# Supplementary material for: Genome-wide and evolutionary analysis of the class III peroxidase gene family in wheat and Aegilops tauschii reveals that some members are involved in stress responses
Source: PubMed Central journal article supplement (PMC6704529; doi:10.1186/s12864-019-6006-5), 2019-08-22

### T.ae class III peroxidase I subfamily exon-intron and prx domain diagram (part 1)

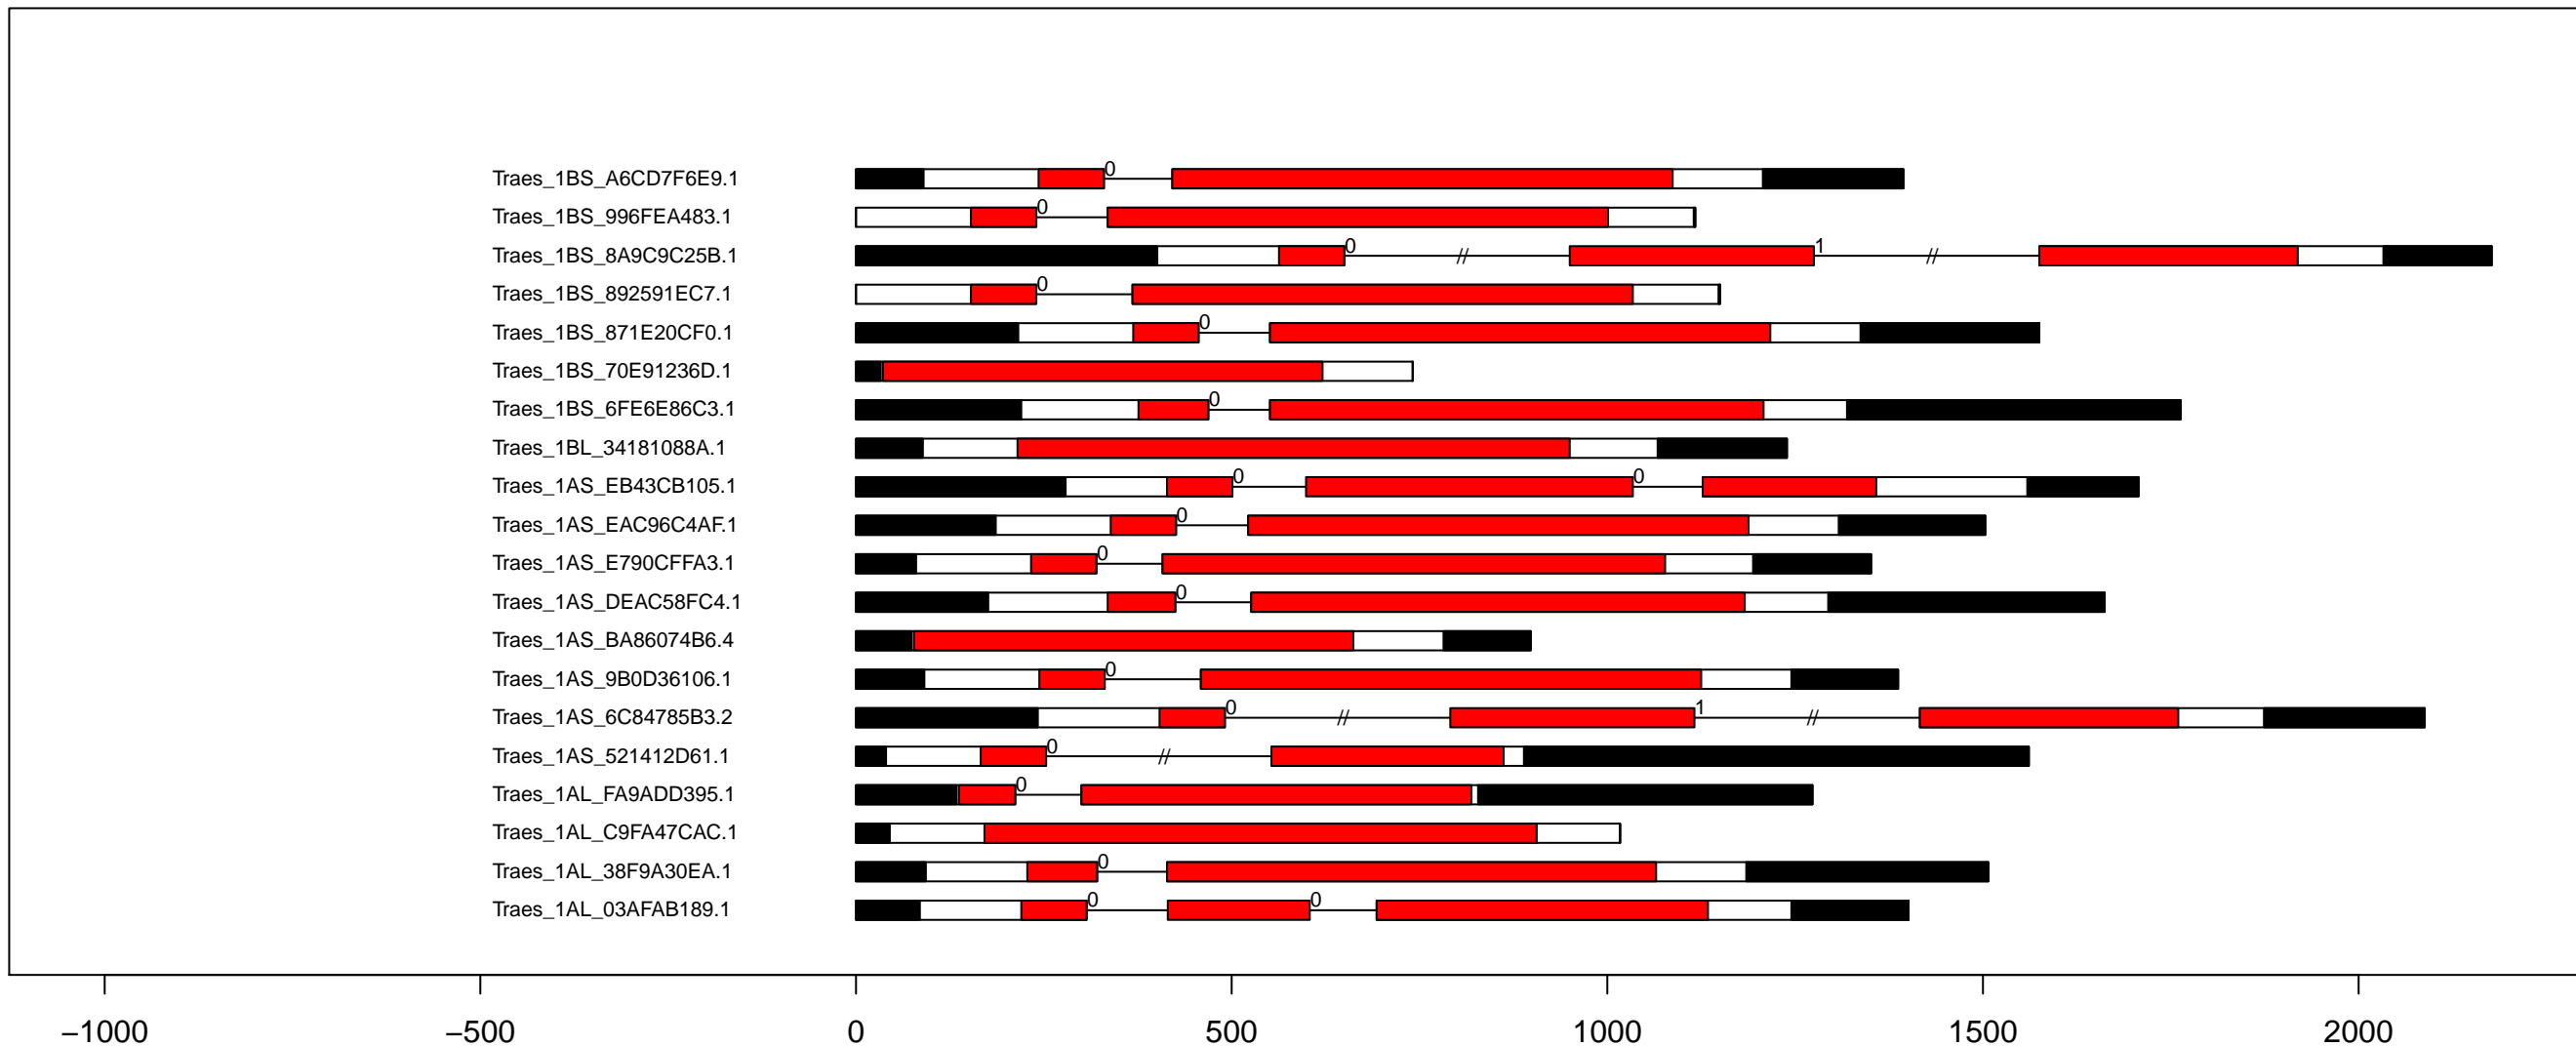

### T.ae class III peroxidase I subfamily exon-intron and prx domain diagram (part 2)

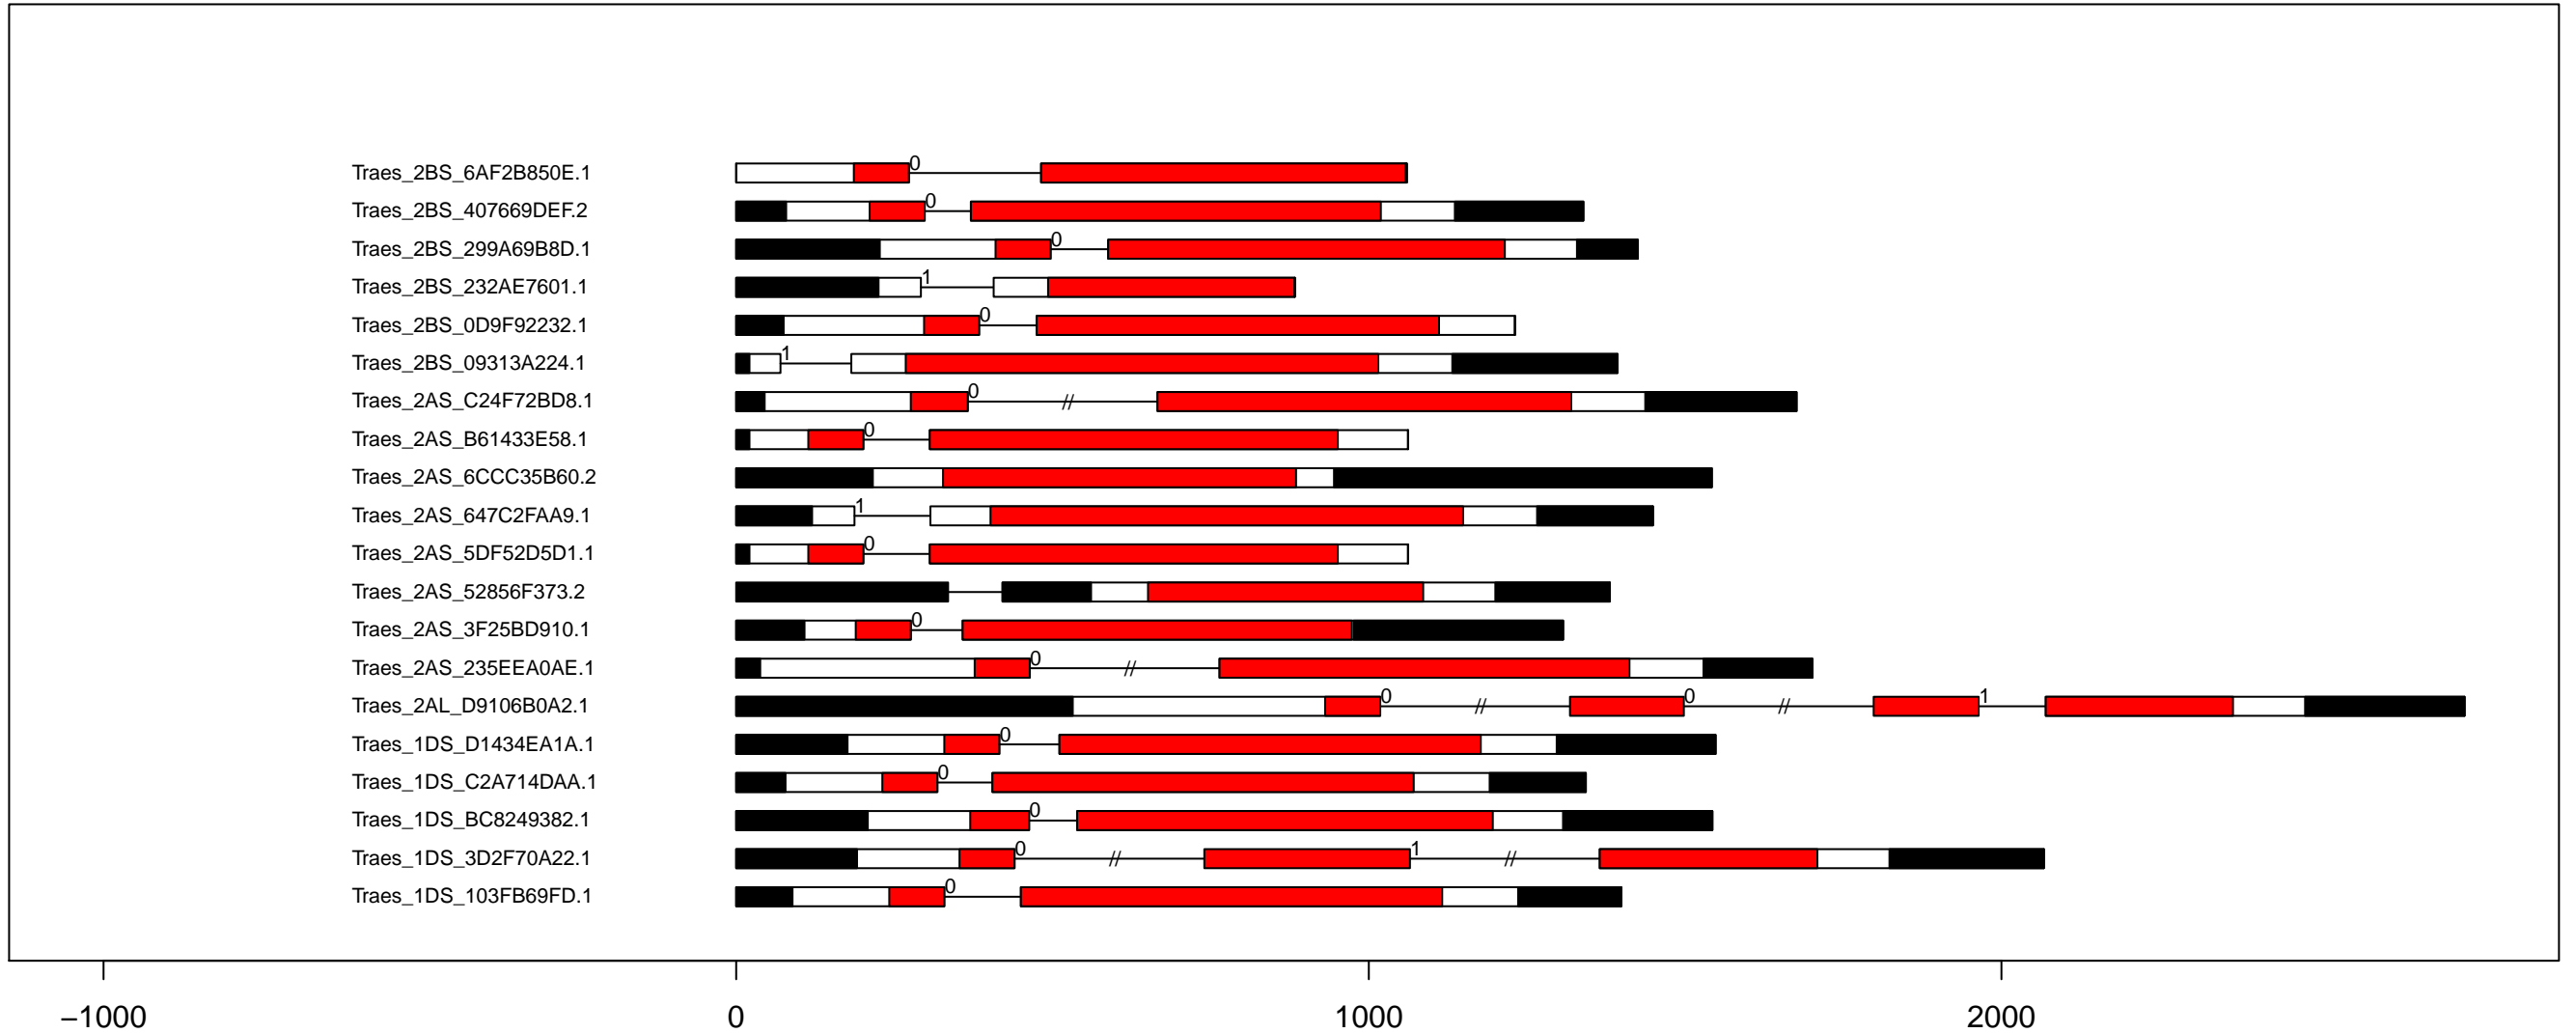

### T.ae class III peroxidase I subfamily exon-intron and prx domain diagram (part 3)

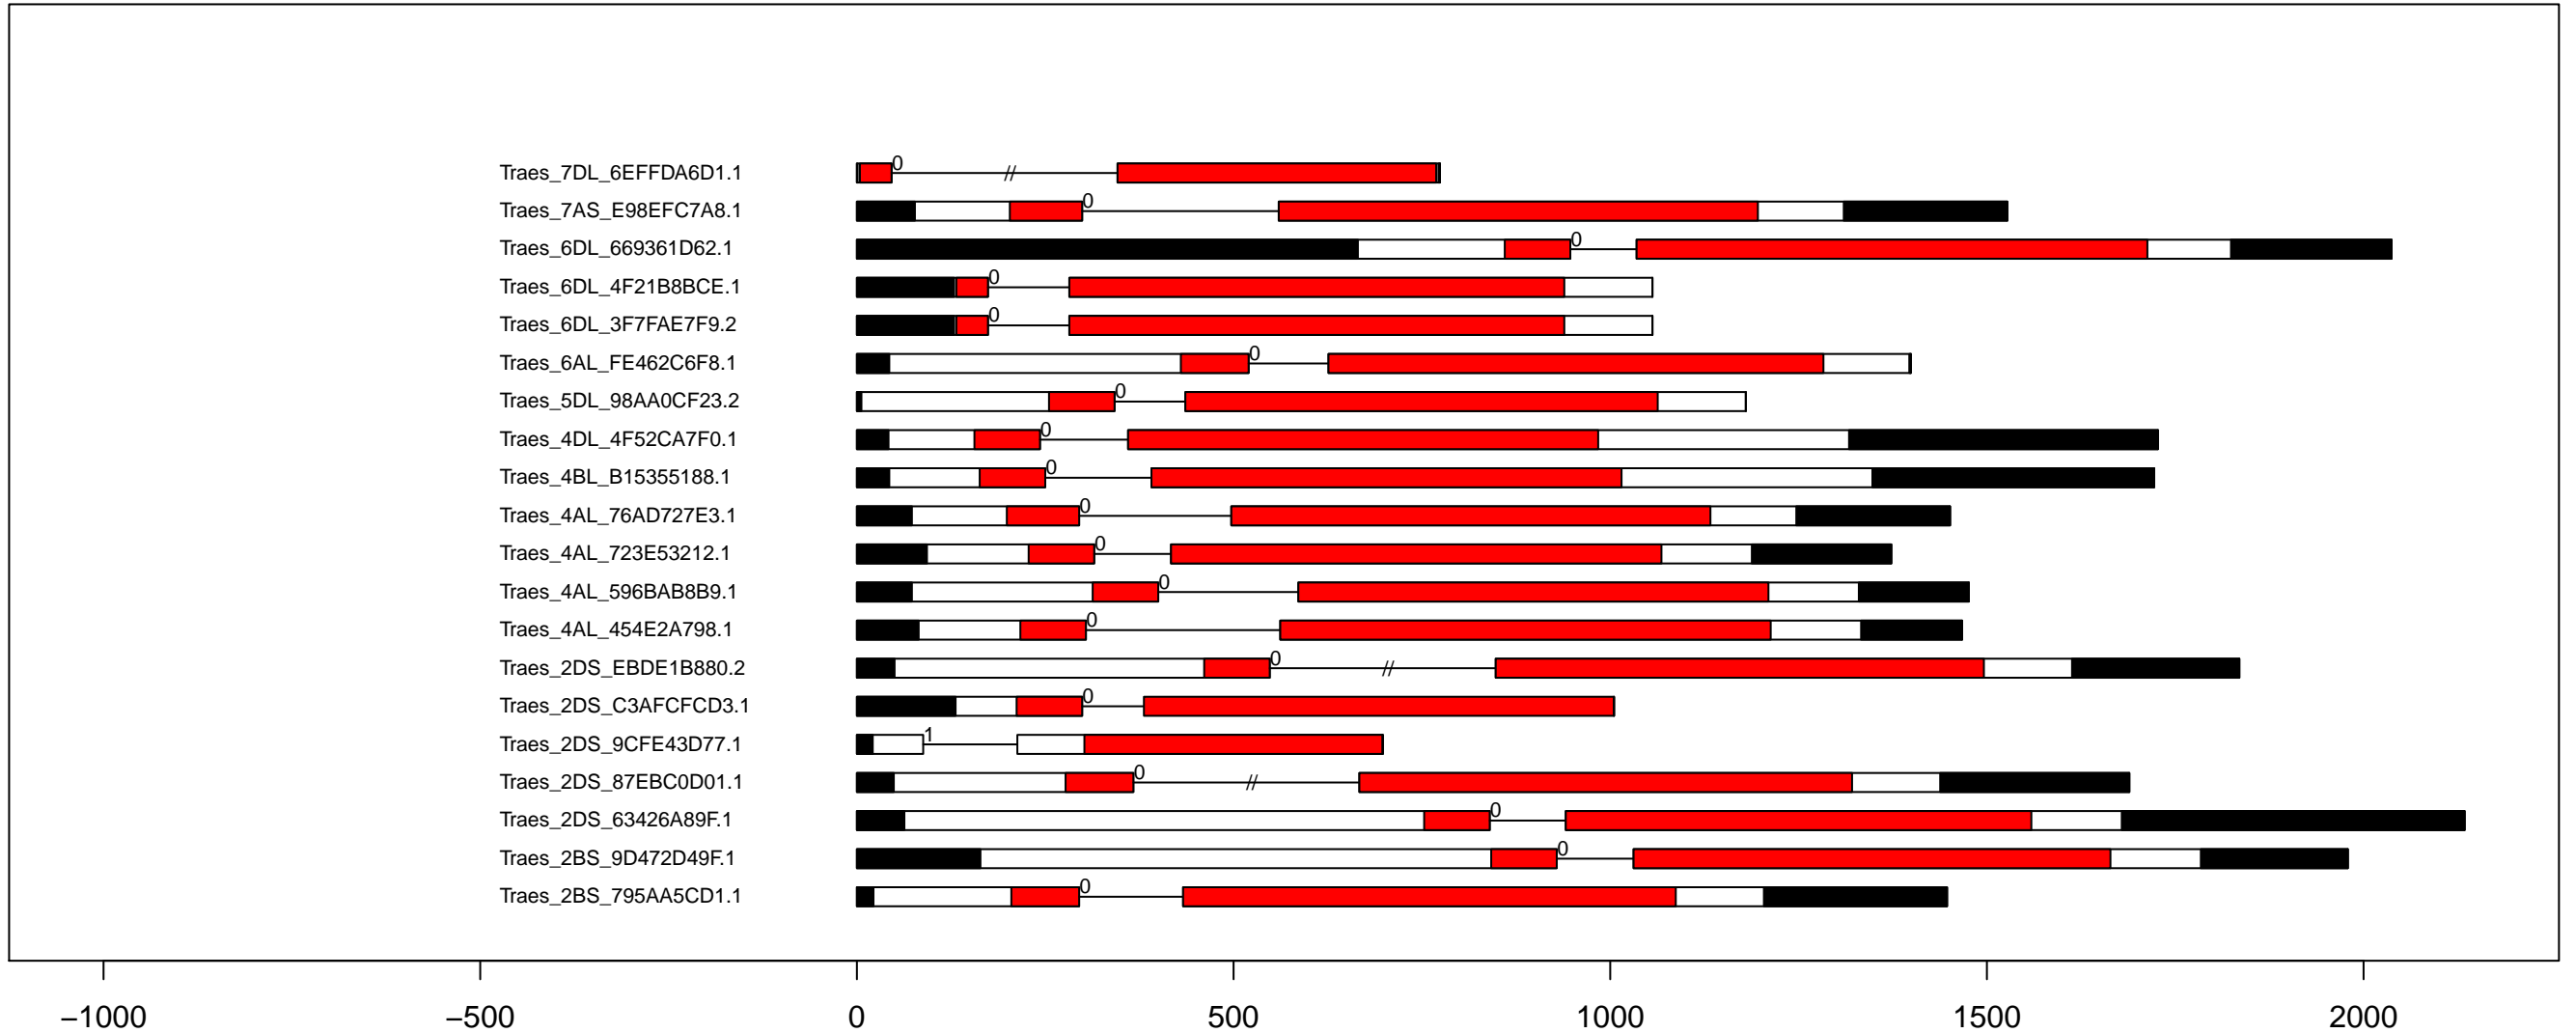

# T.ae class III peroxidase I subfamily exon-intron and prx domain diagram (part 4)

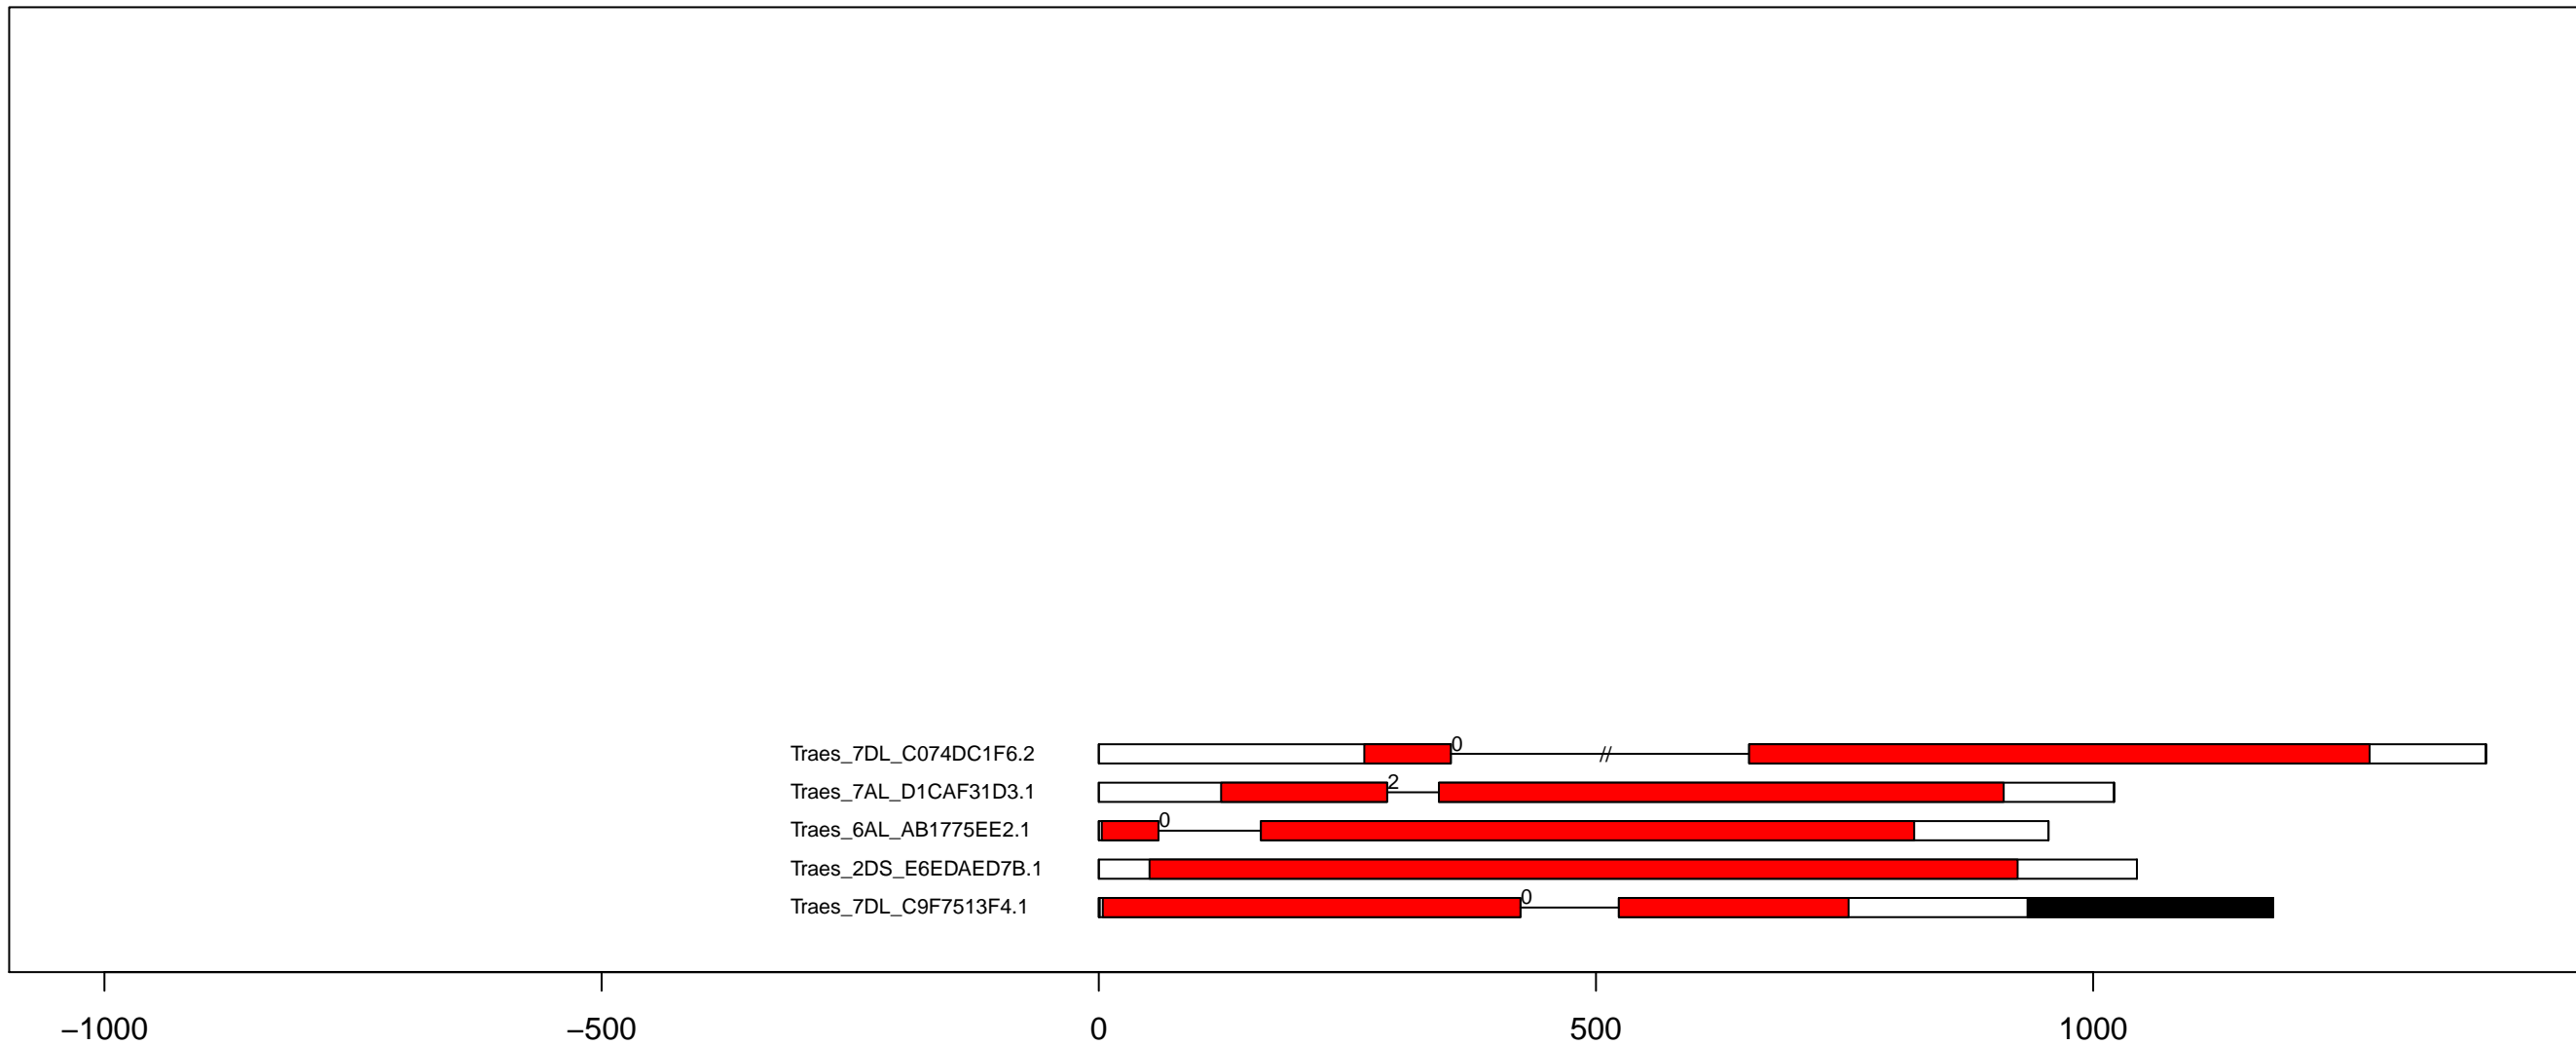

# T.ae class III peroxidase II subfamily exon-intron and prx domain diagram (all)

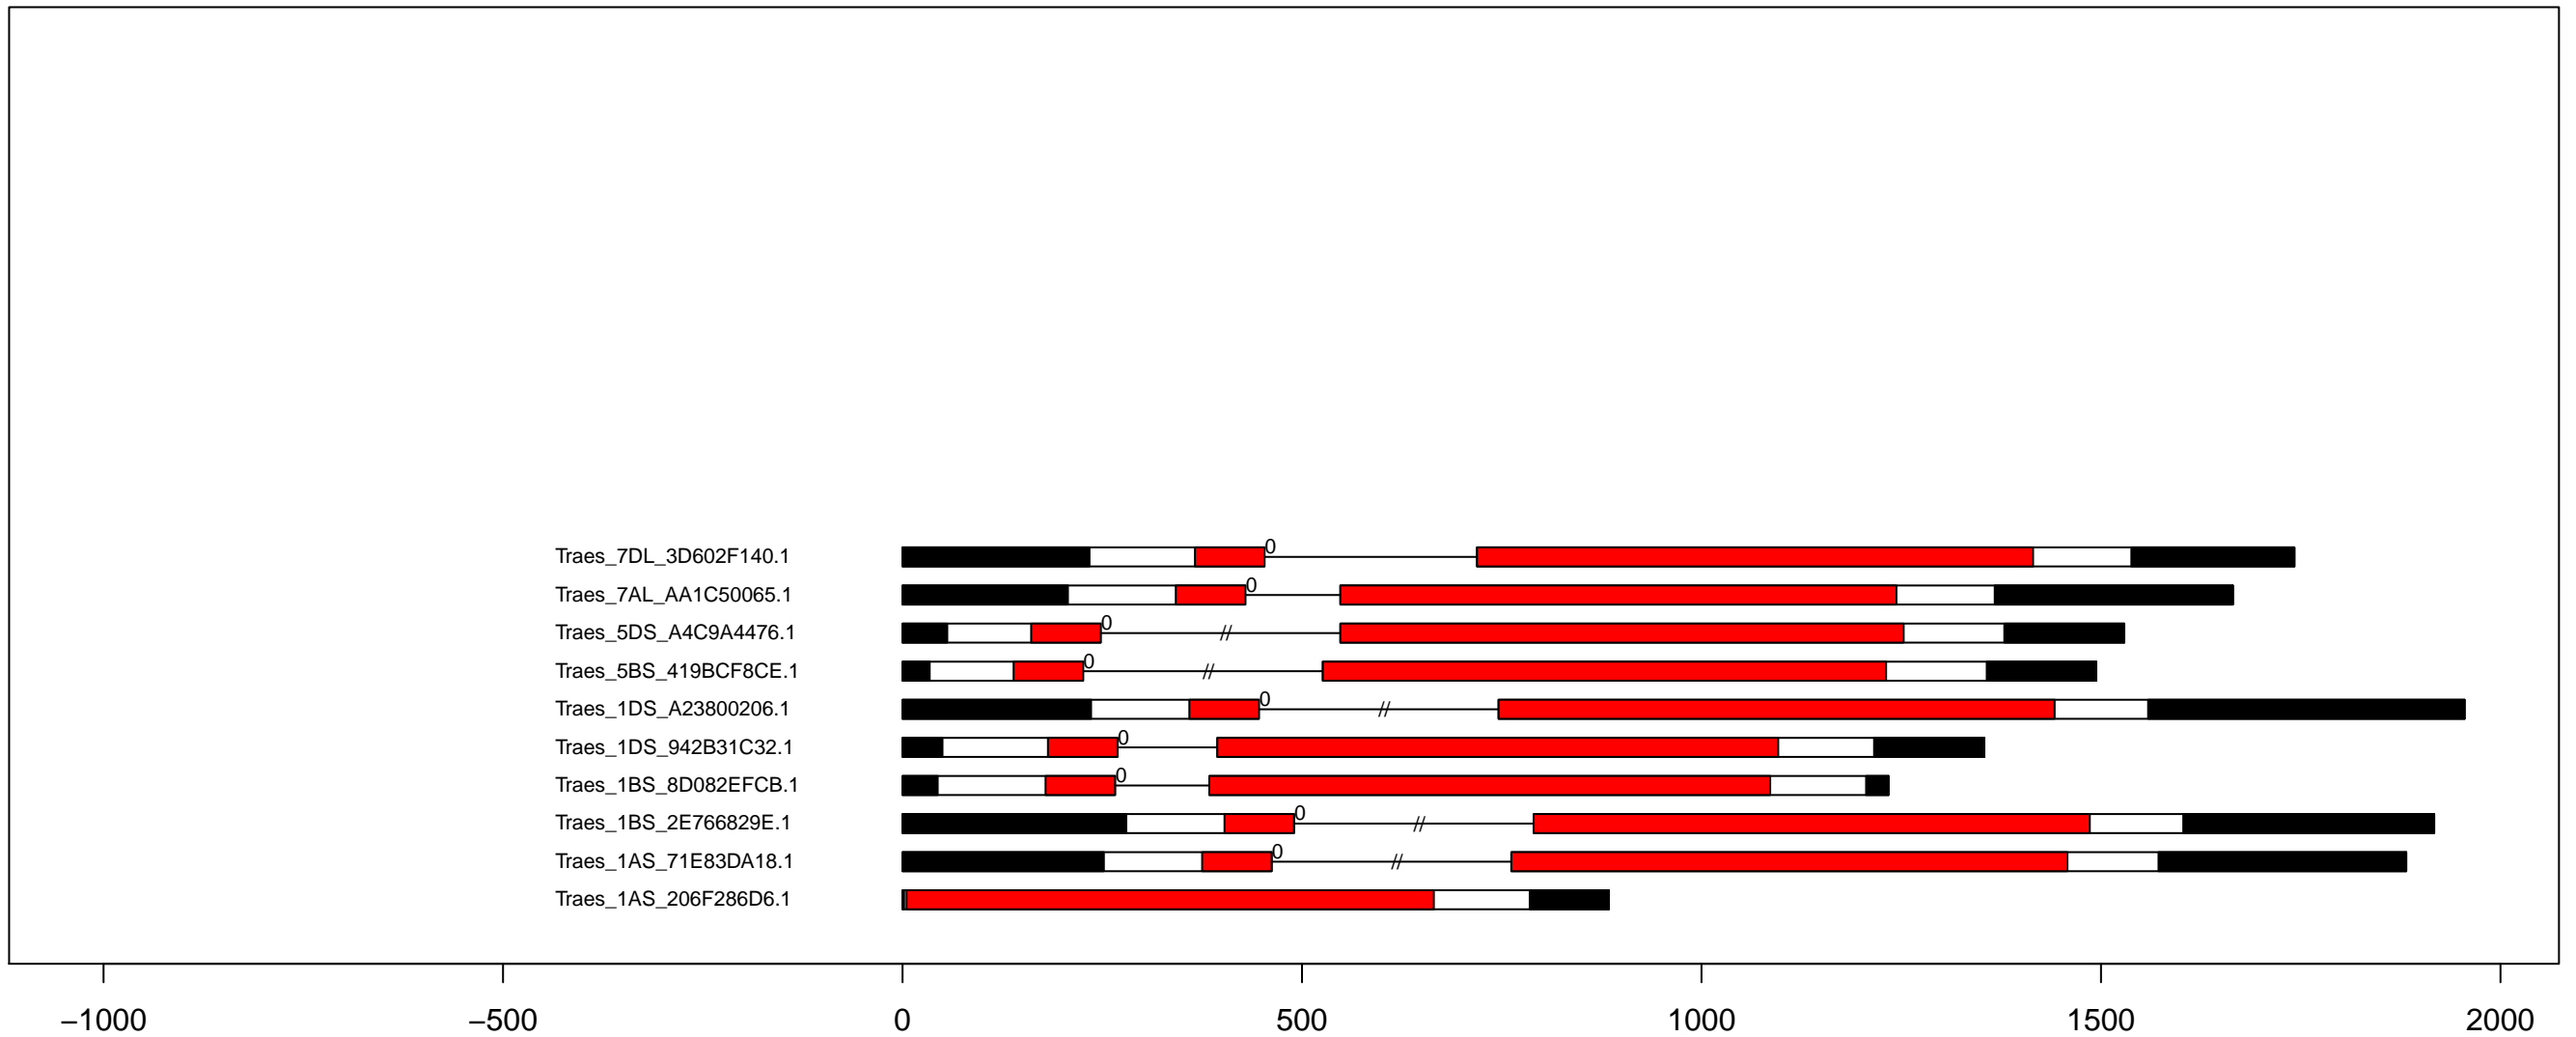

### T.ae class III peroxidase V subfamily exon-intron and prx domain diagram (part 1)

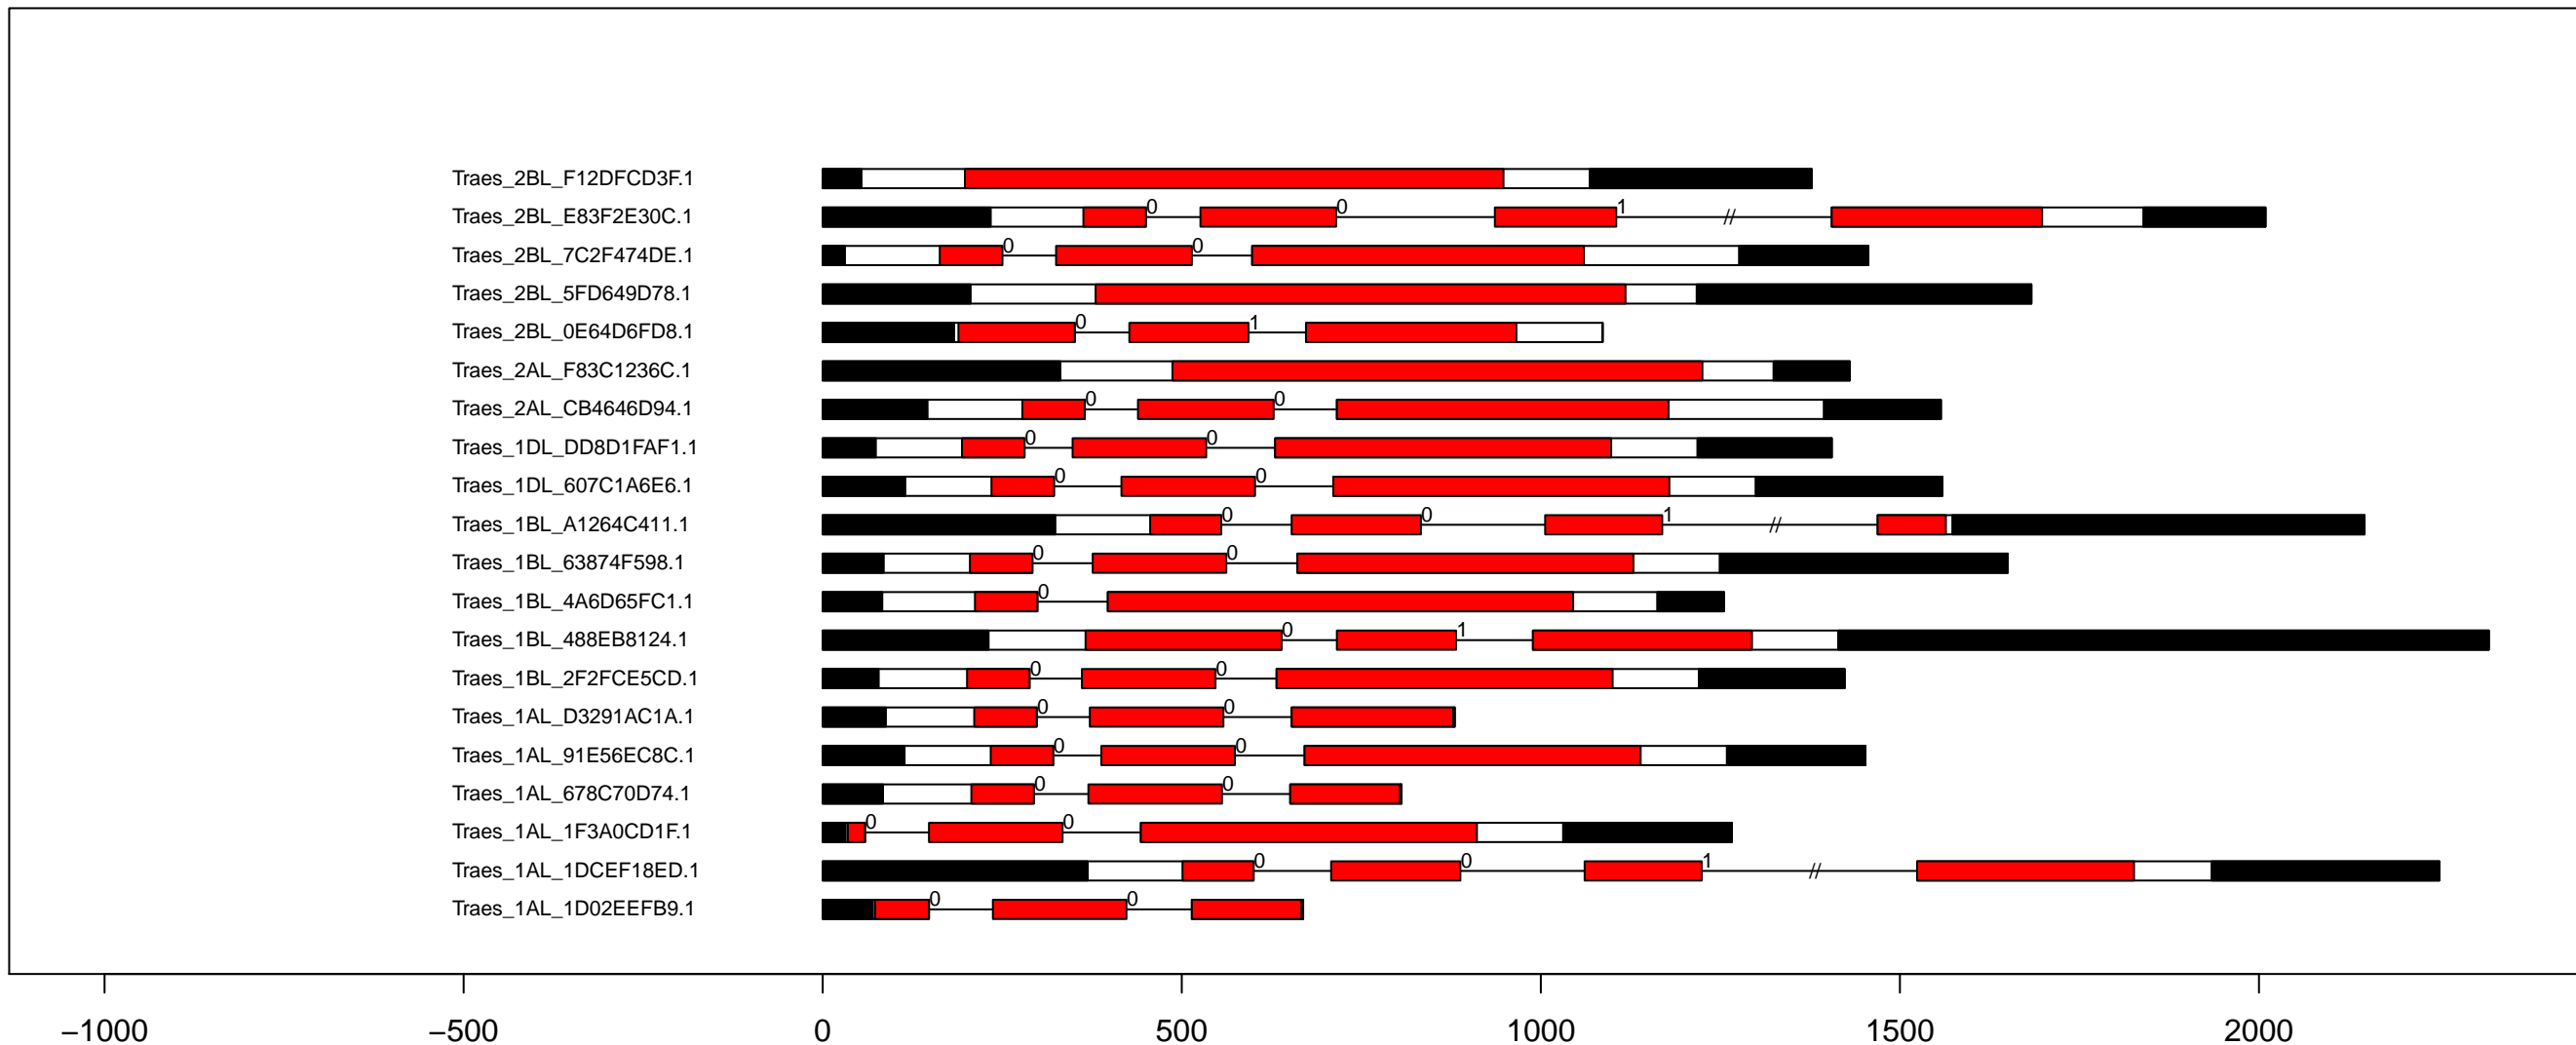

### T.ae class III peroxidase V subfamily exon-intron and prx domain diagram (part 2)

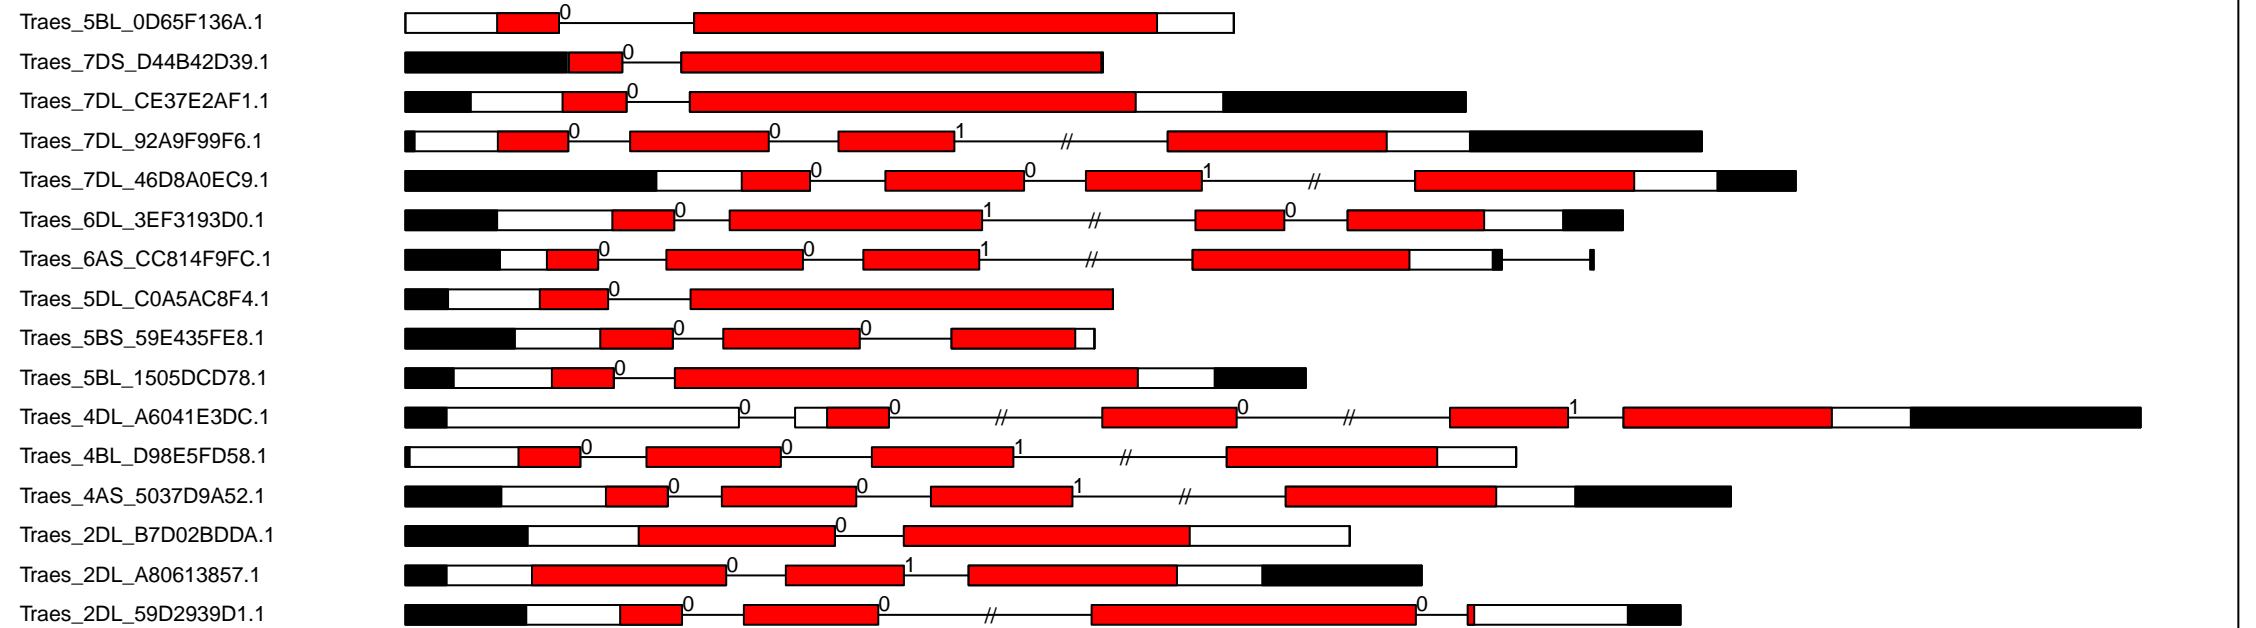

### T.ae class III peroxidase VI subfamily exon-intron and prx domain diagram (all)

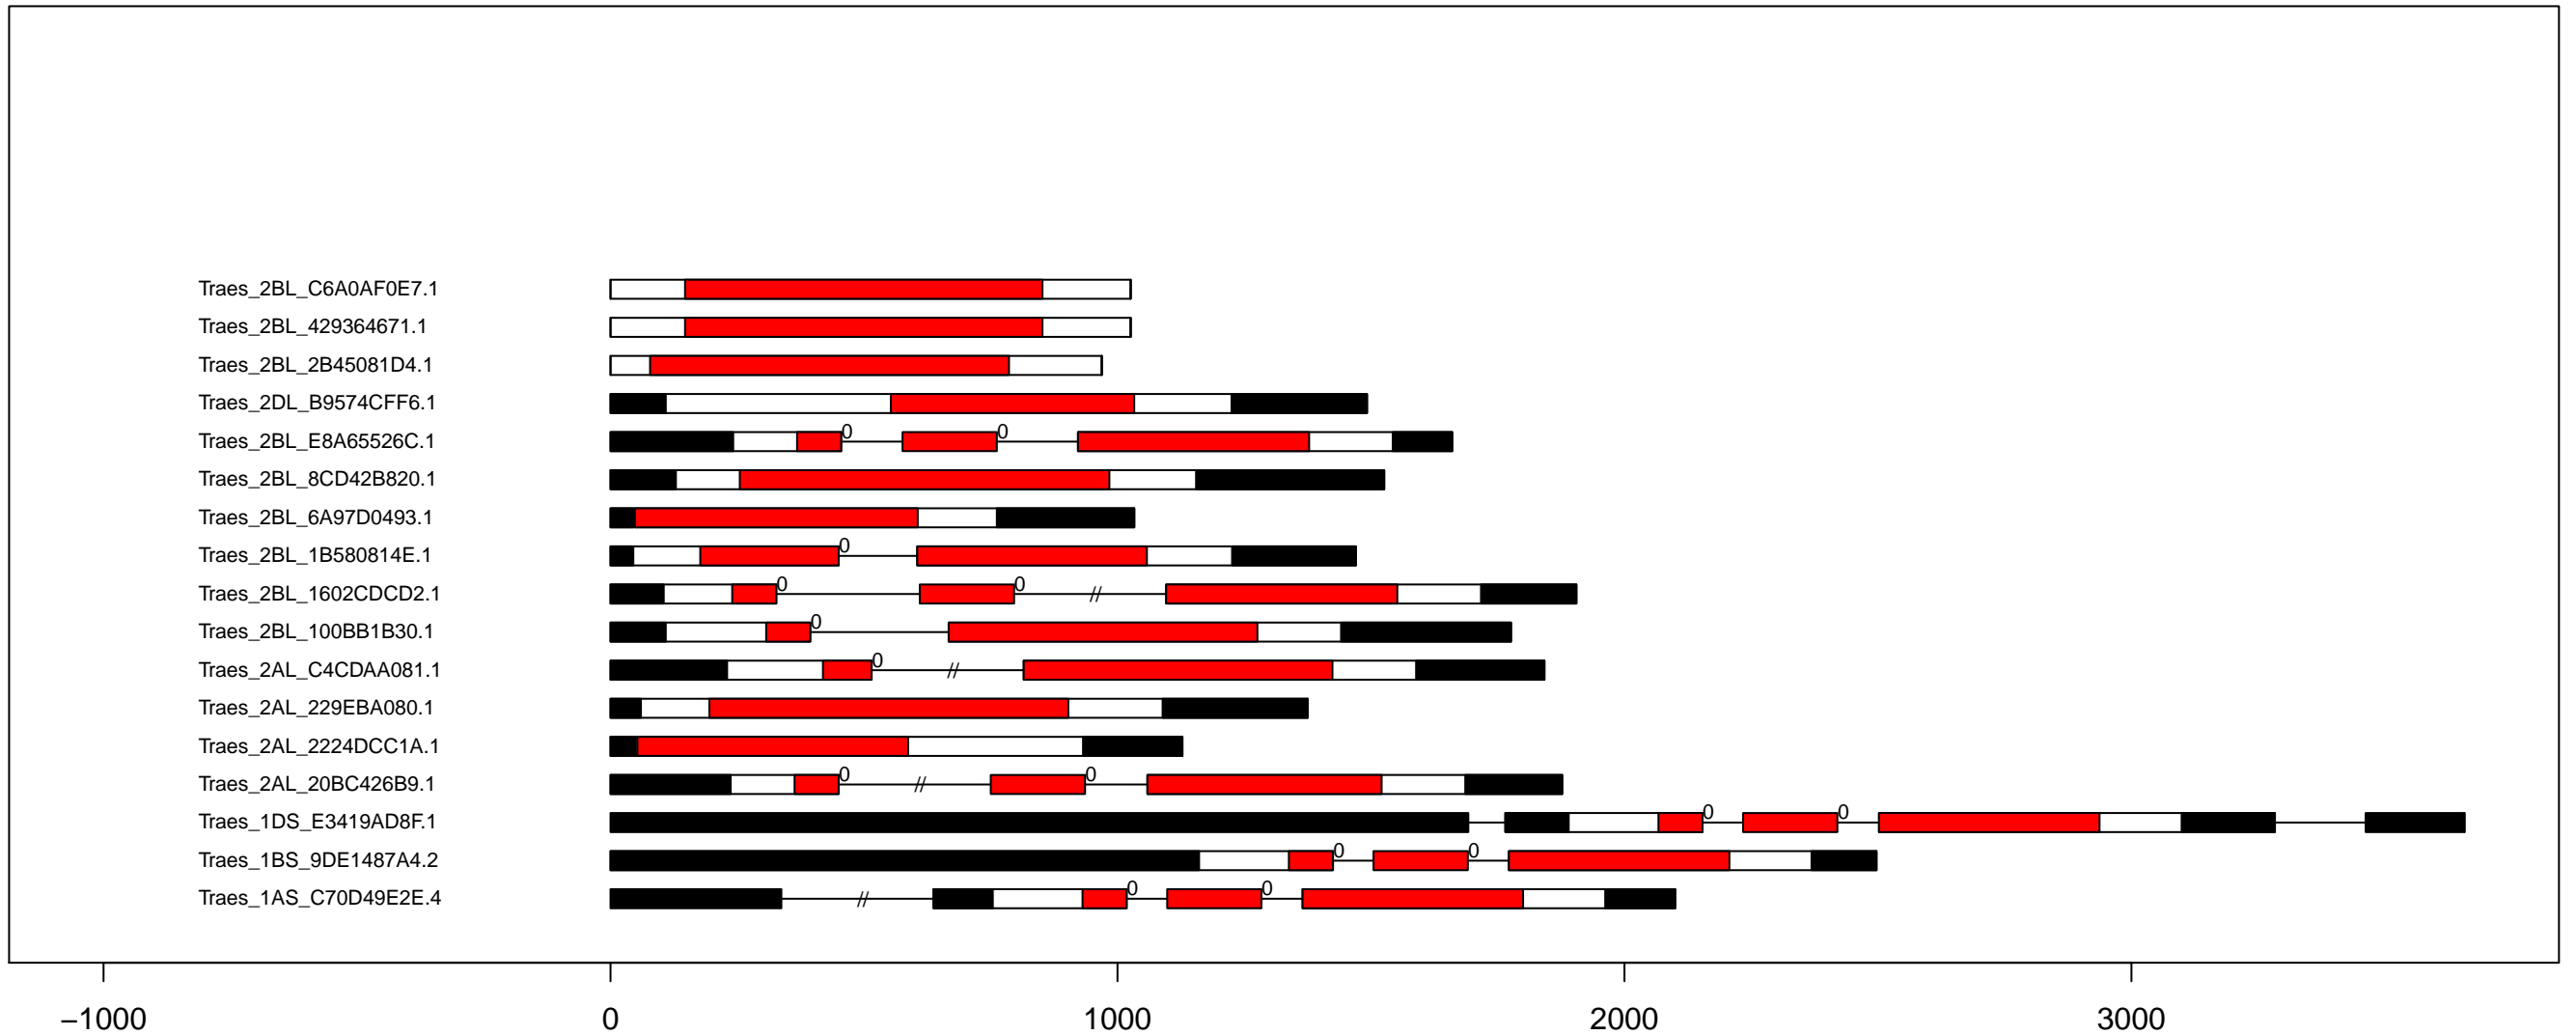



### T.ae class III peroxidase VII subfamily exon-intron and prx domain diagram (all)

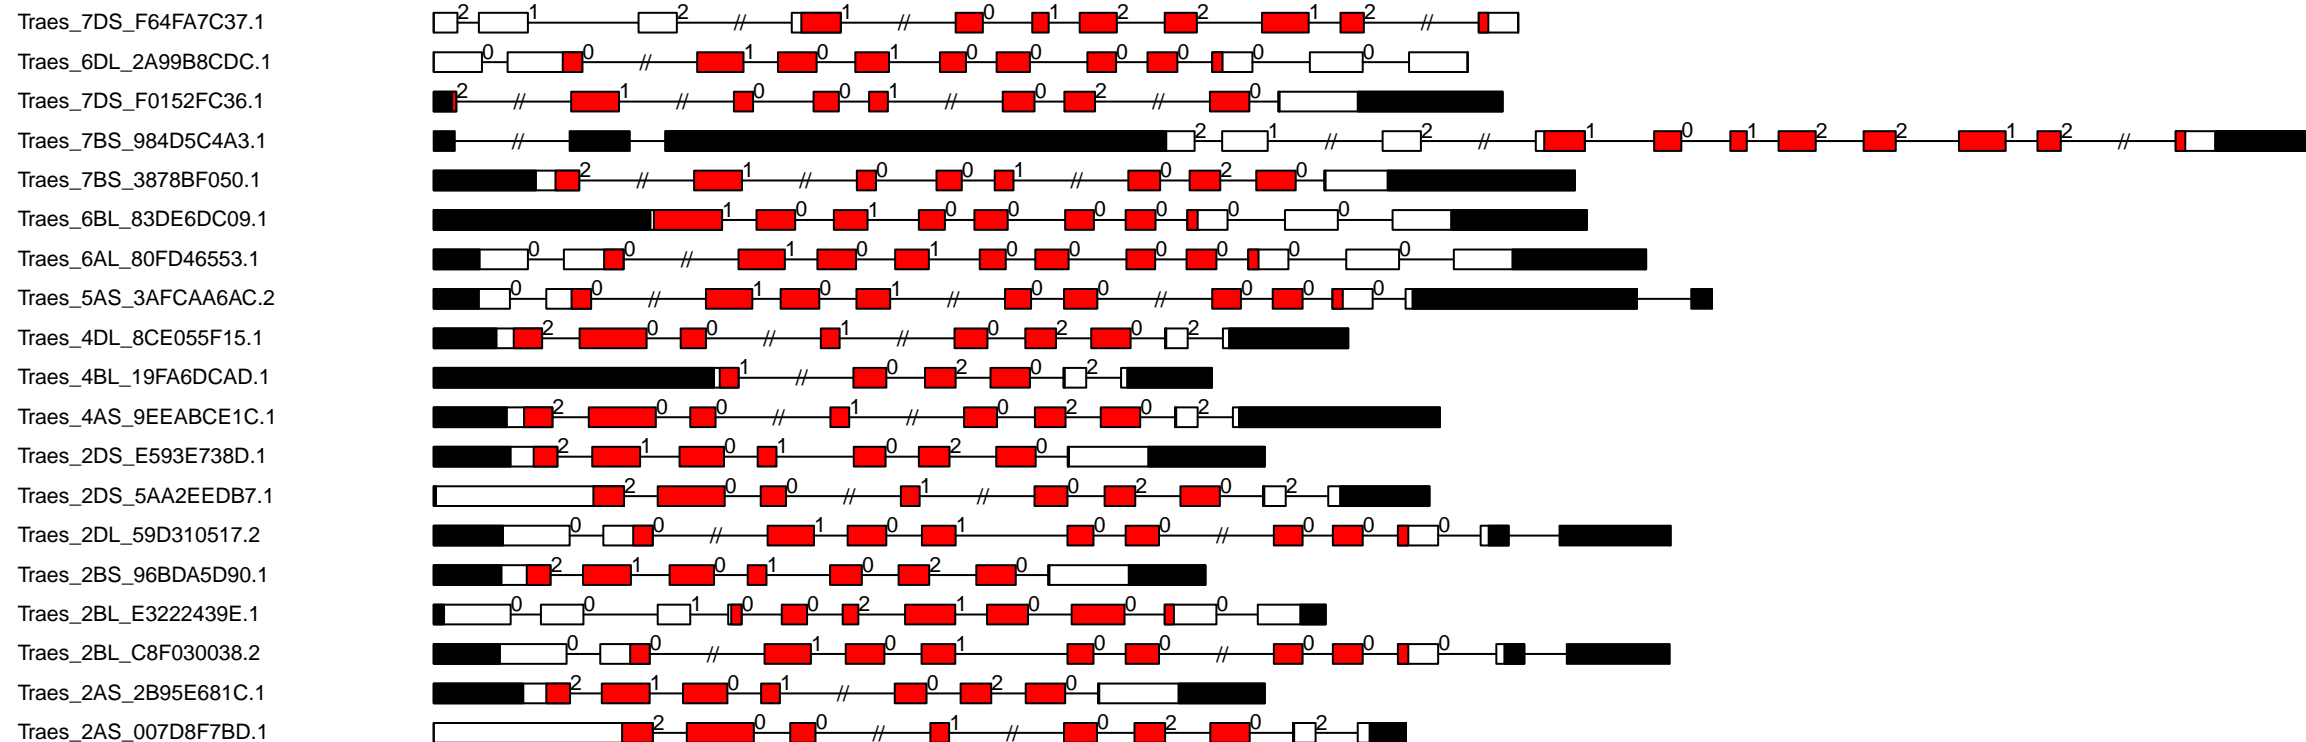

### T.ae class III peroxidase IX subfamily exon-intron and prx domain diagram (all)

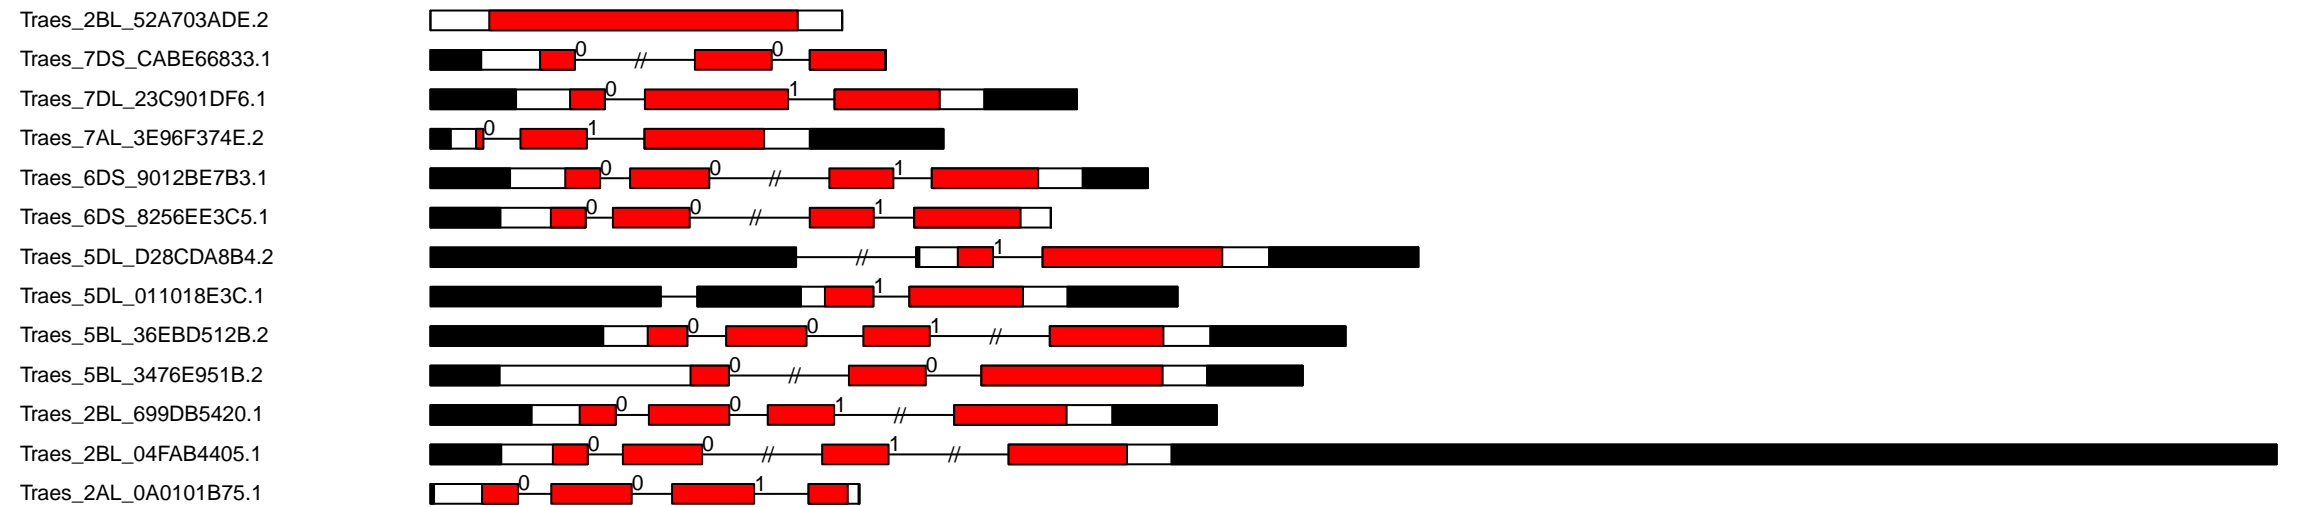

# T.ae class III peroxidase X subfamily exon-intron and prx domain diagram (all)

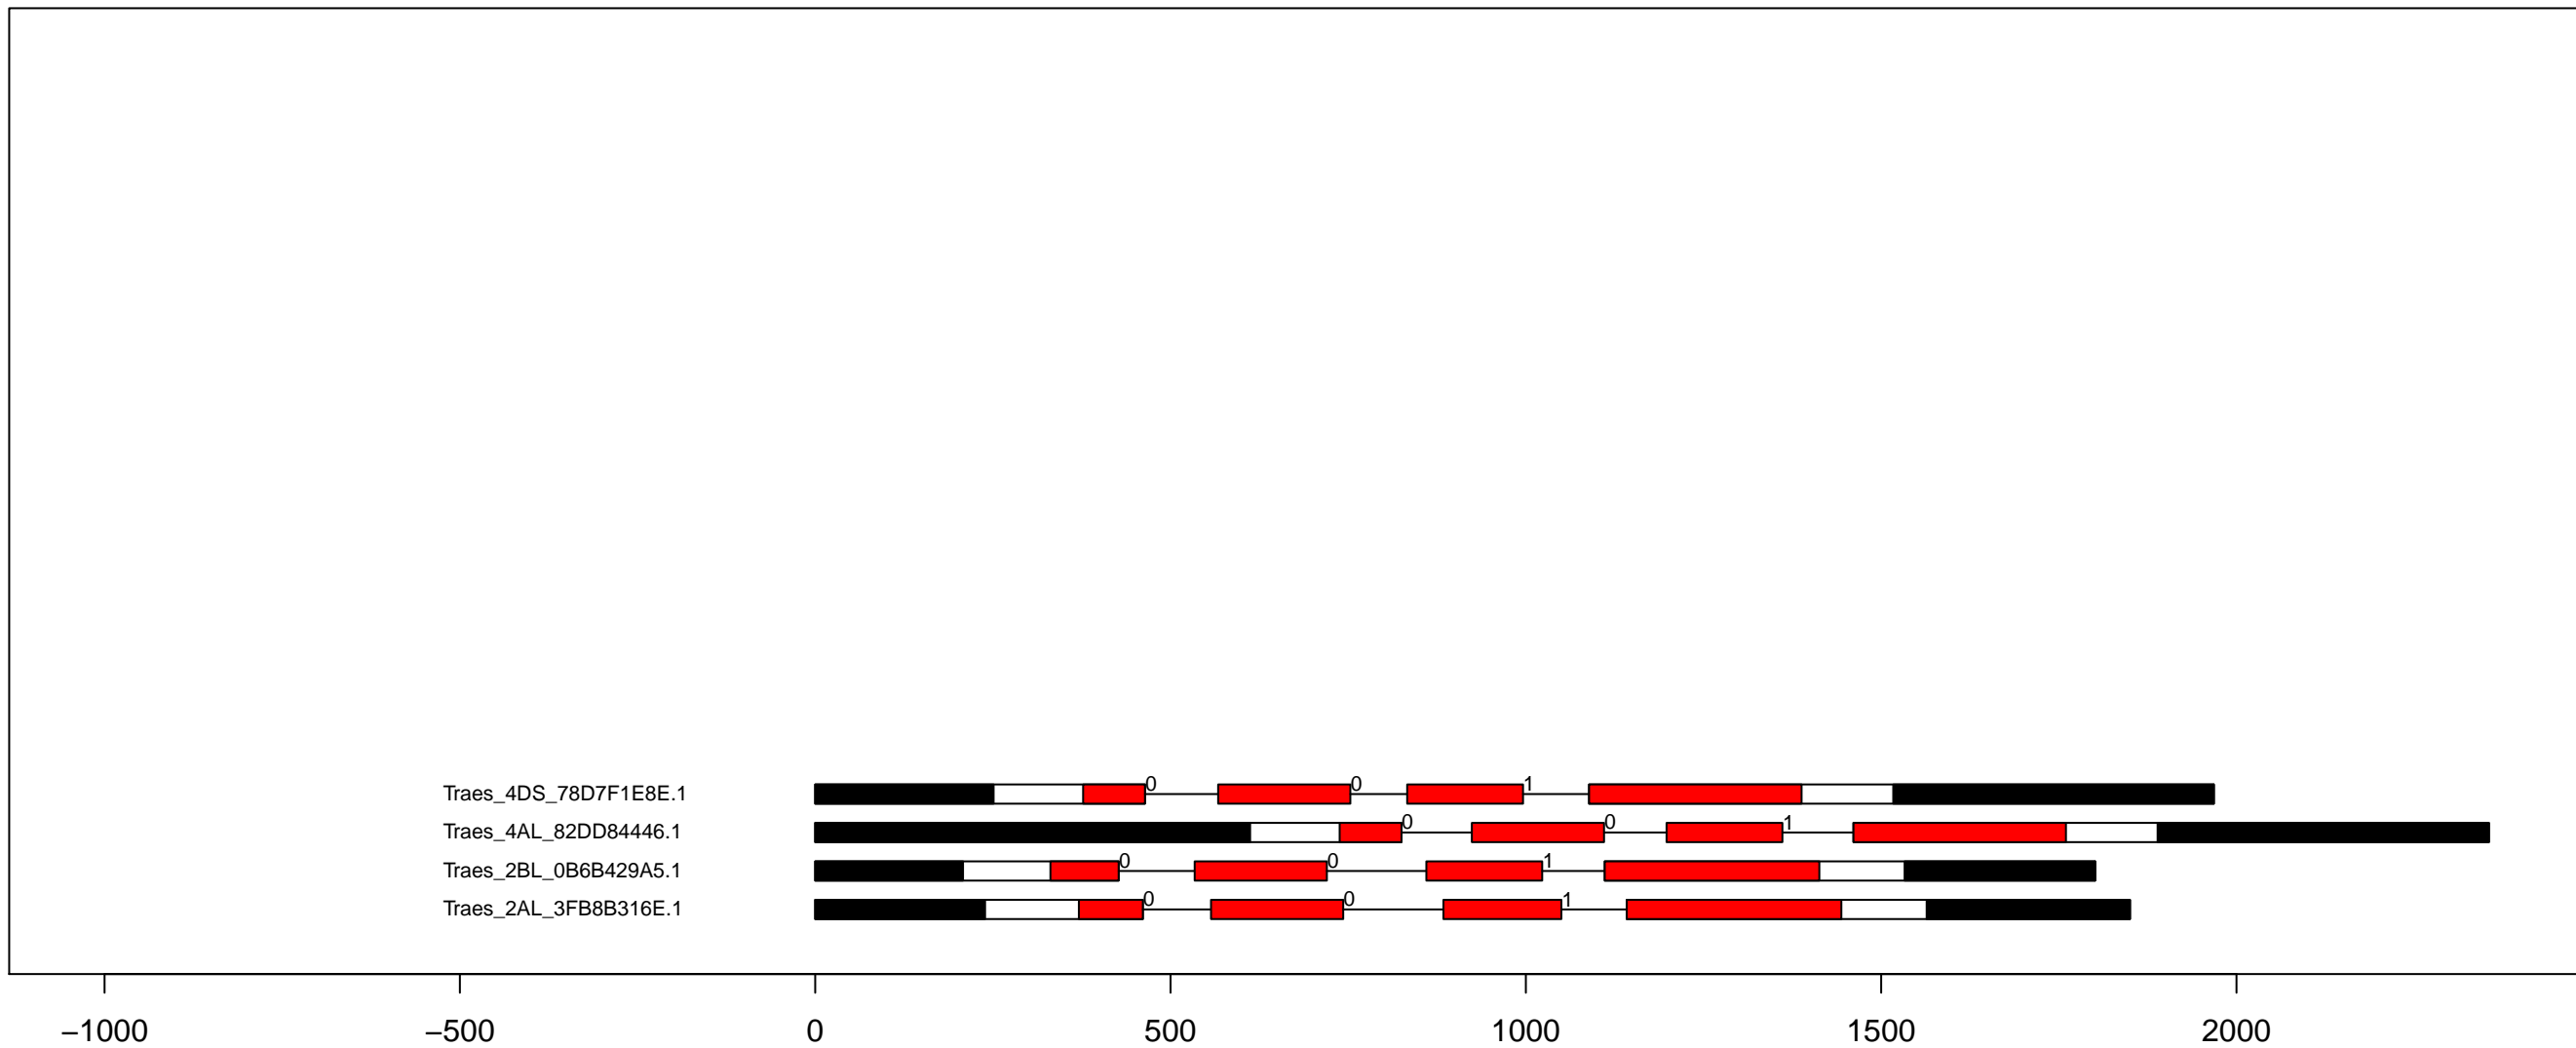

### T.ae class III peroxidase XII subfamily exon-intron and prx domain diagram (all)

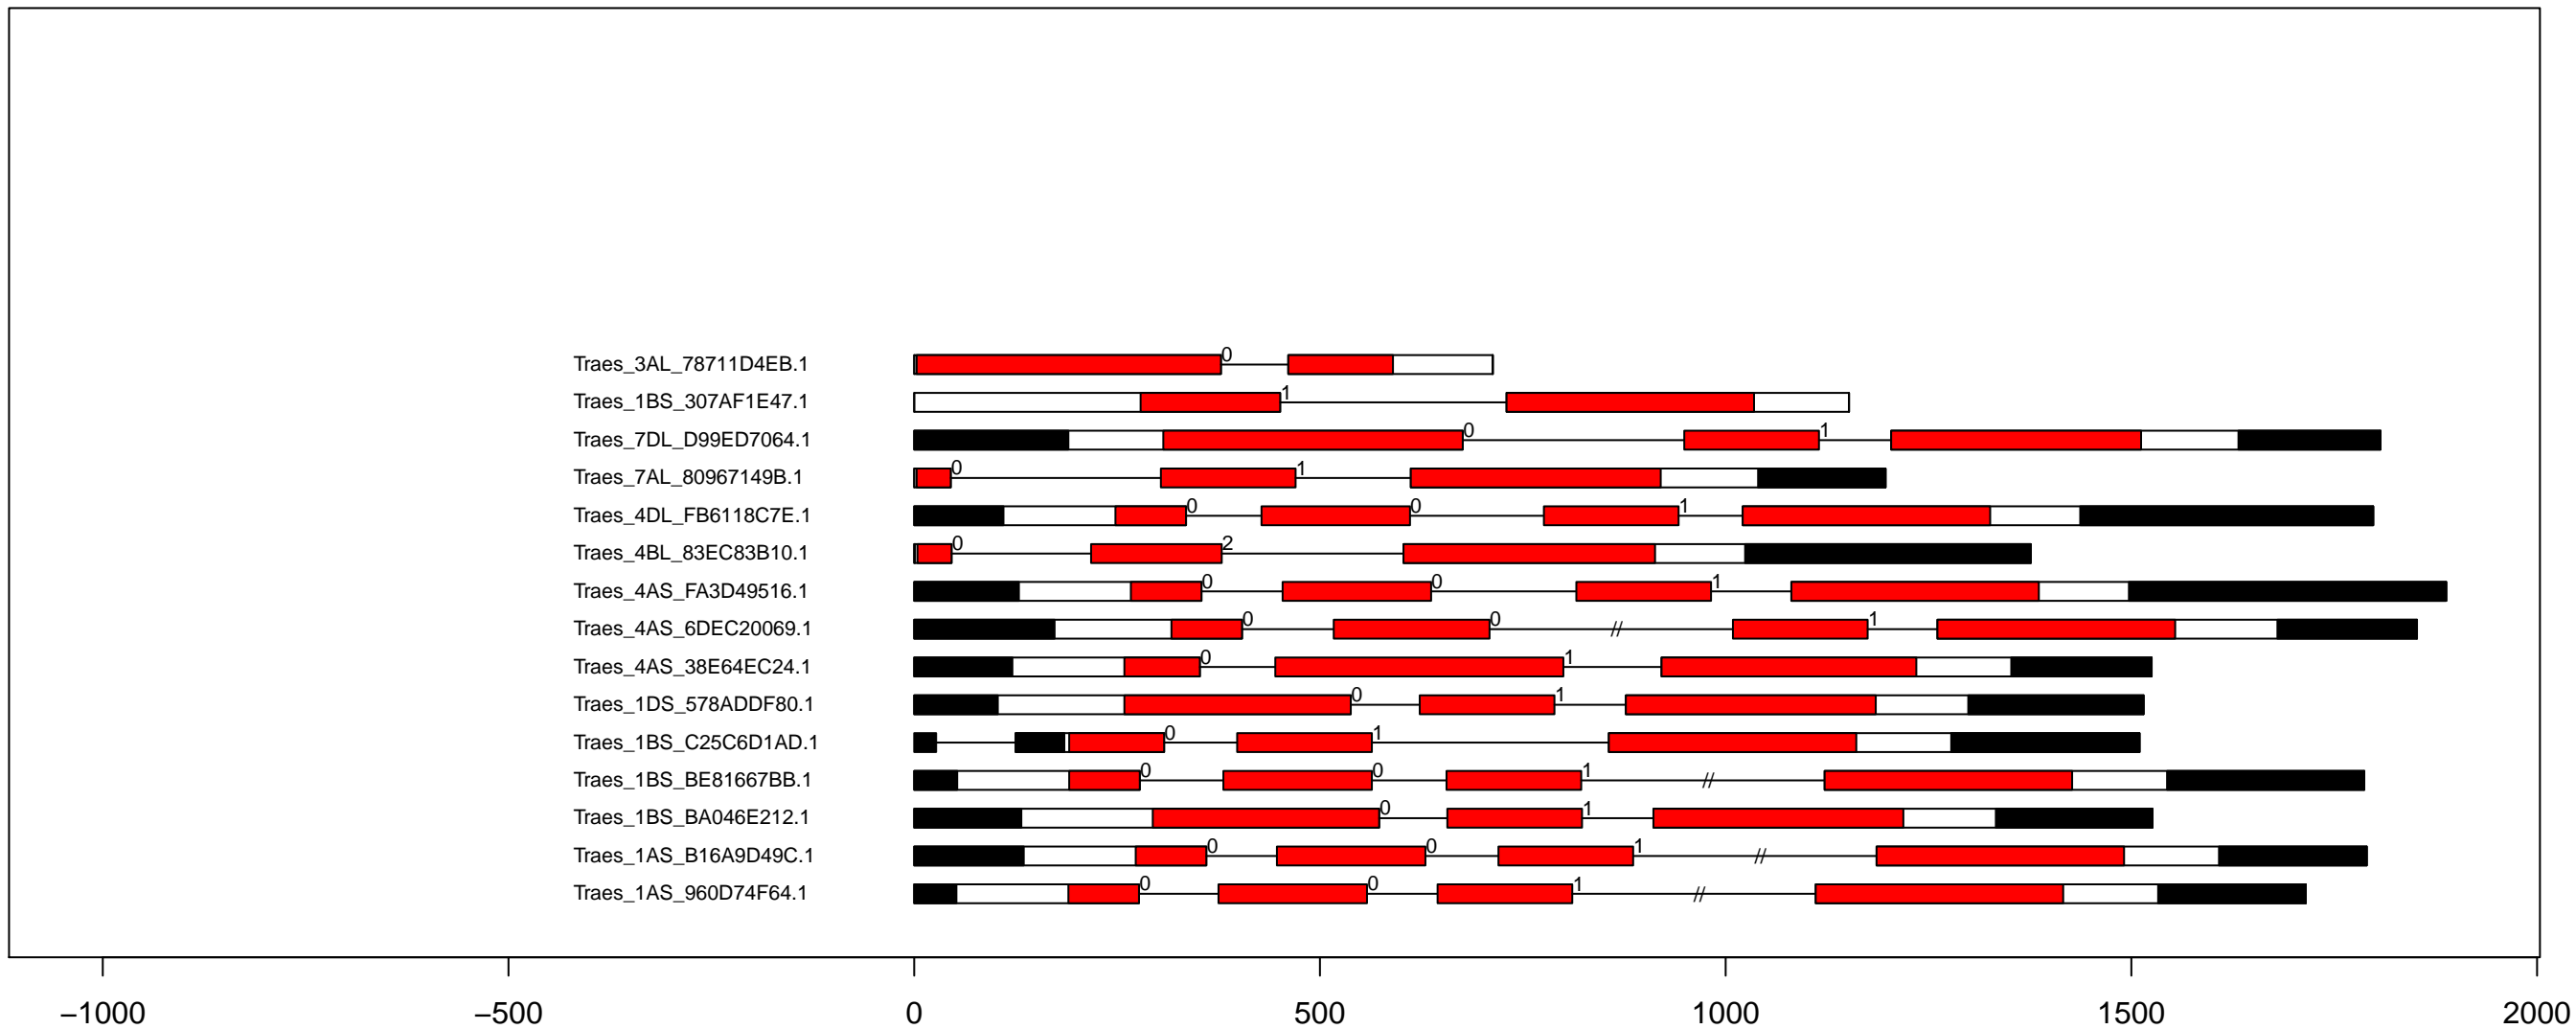

# T.ae class III peroxidase XIV subfamily exon-intron and prx domain diagram (all)

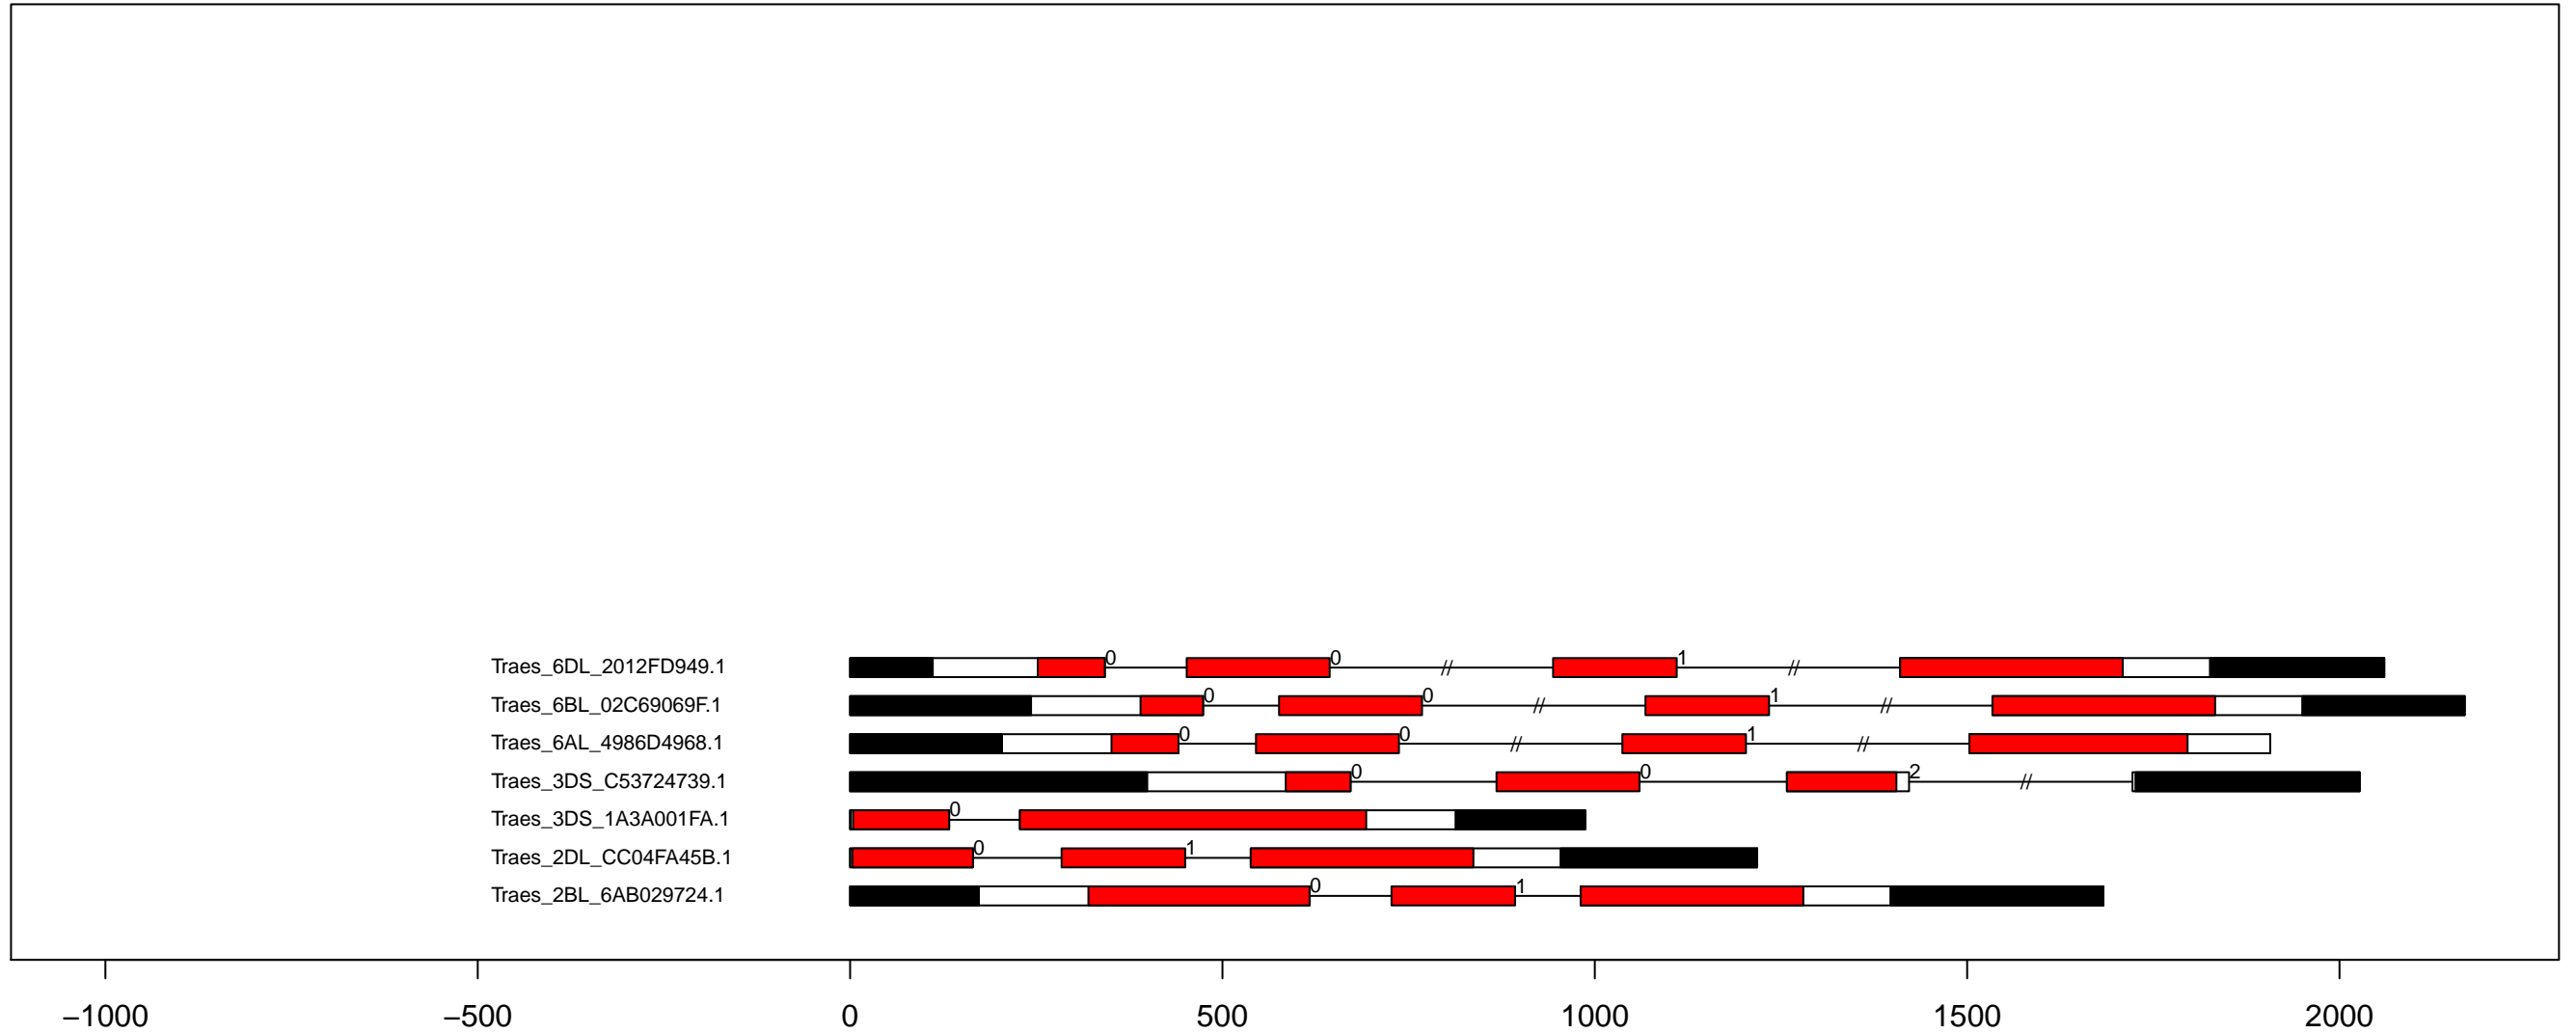

# T.ae class III peroxidase XV subfamily exon-intron and prx domain diagram (all)

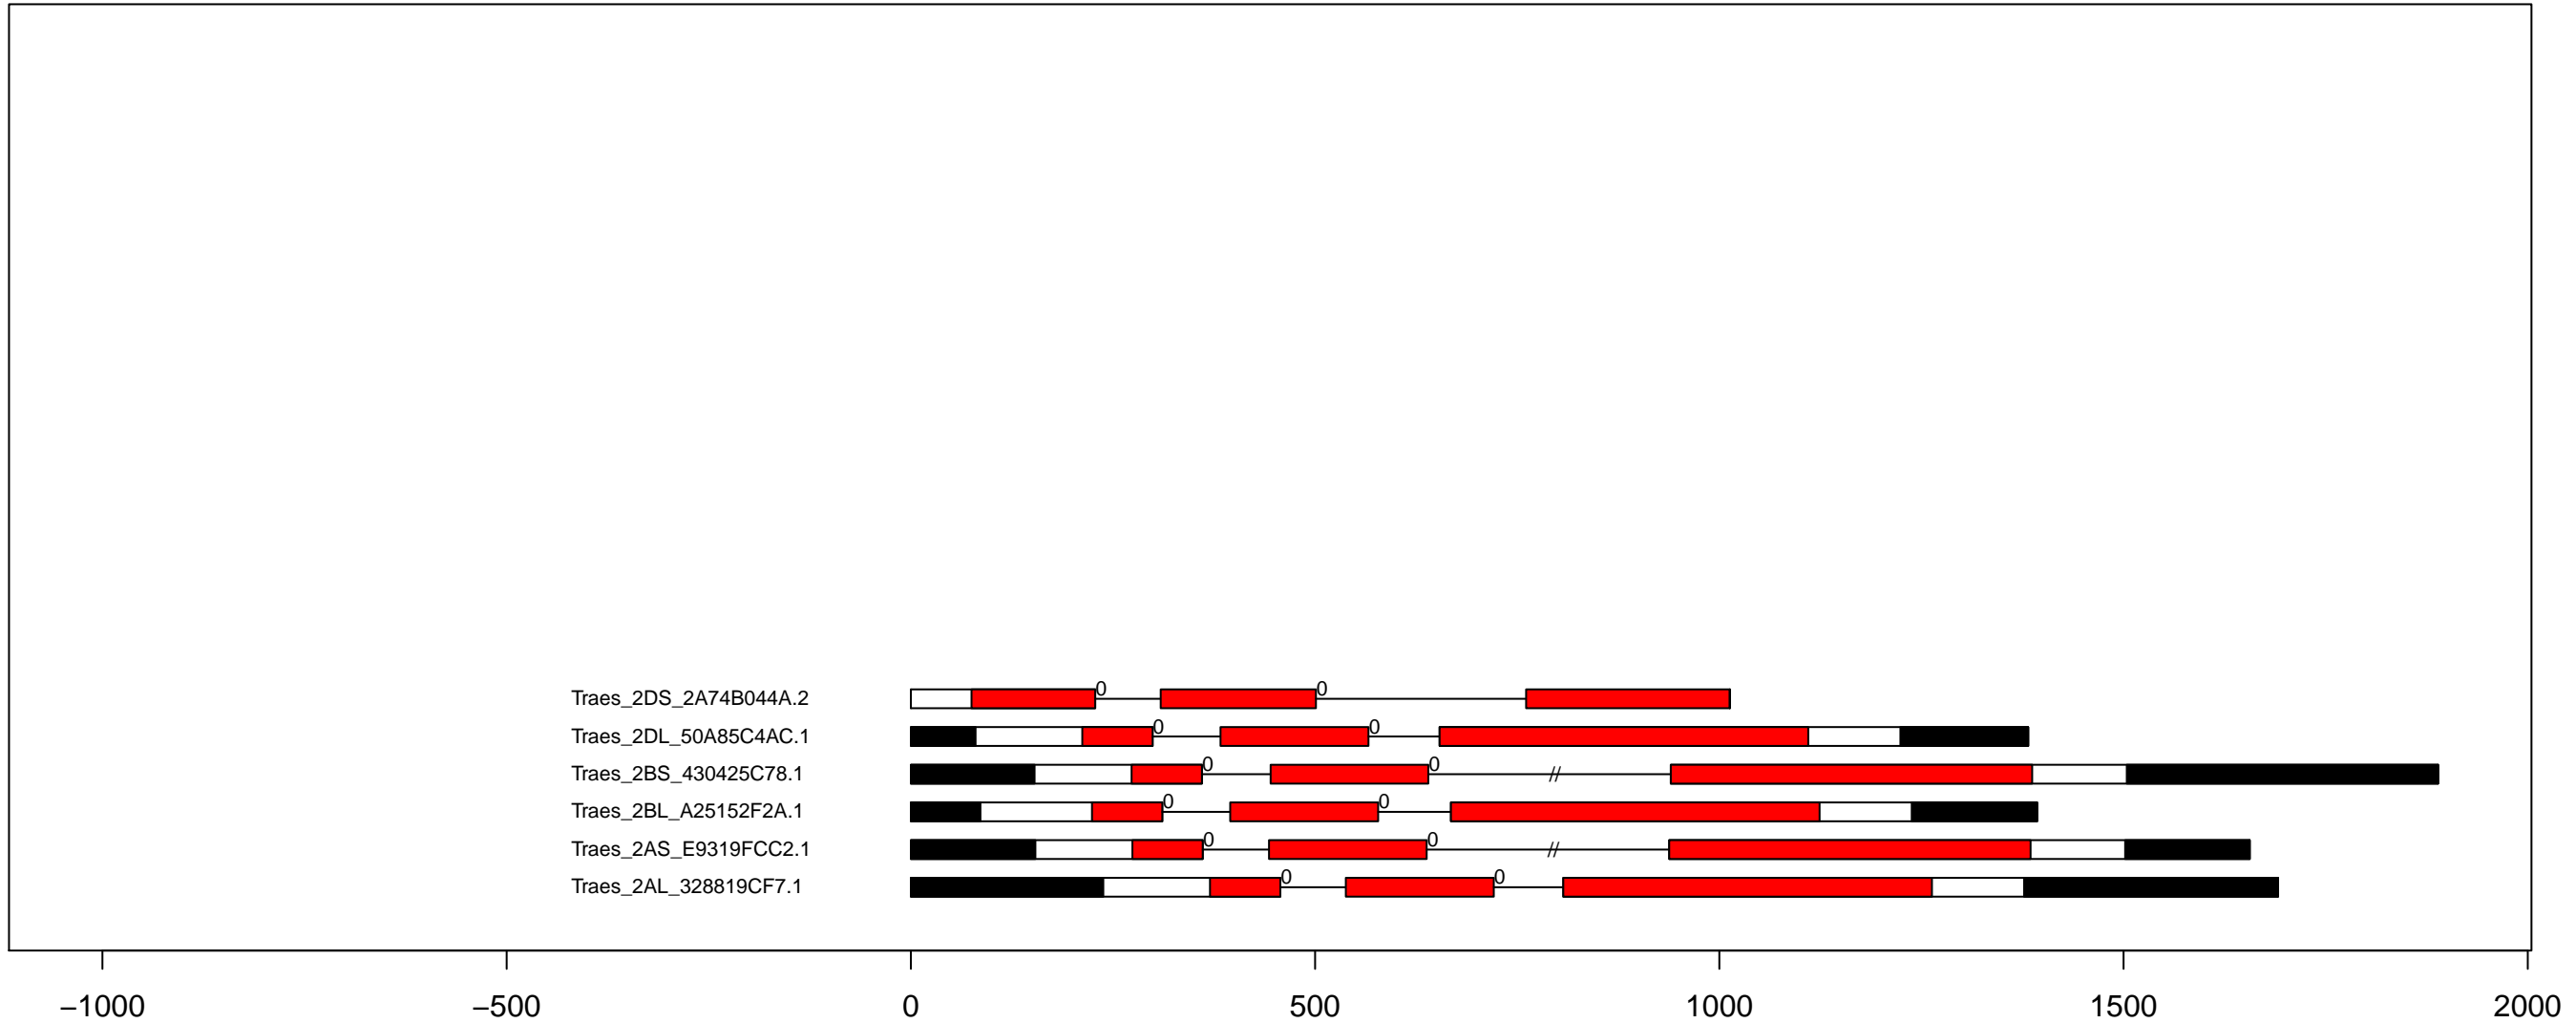

# T.ae class III peroxidase XVI subfamily exon-intron and prx domain diagram (all)

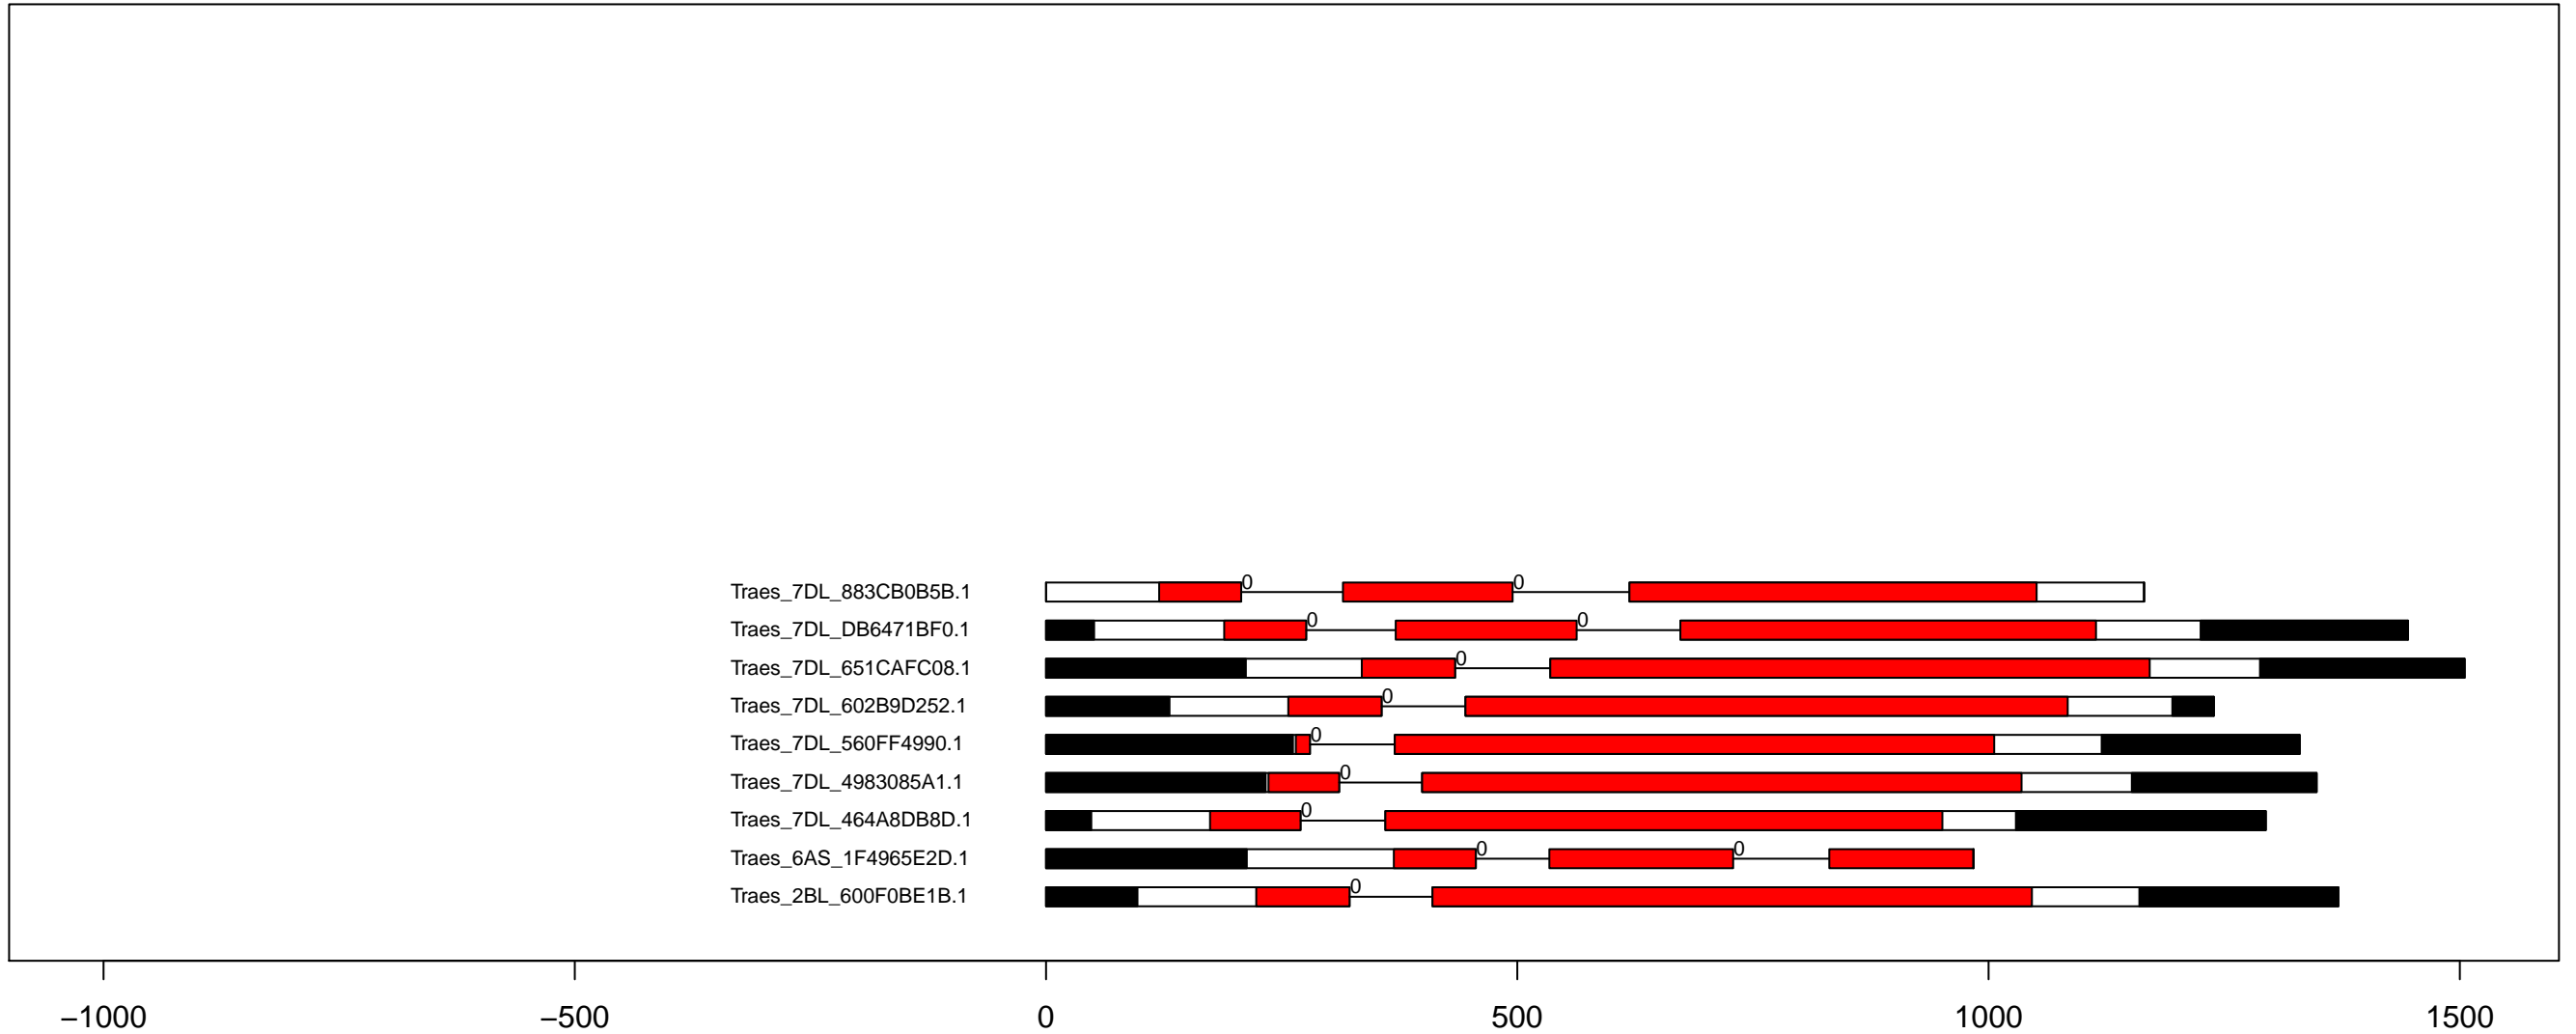

### T.ae class III peroxidase XVII subfamily exon-intron and prx domain diagram (part 1)

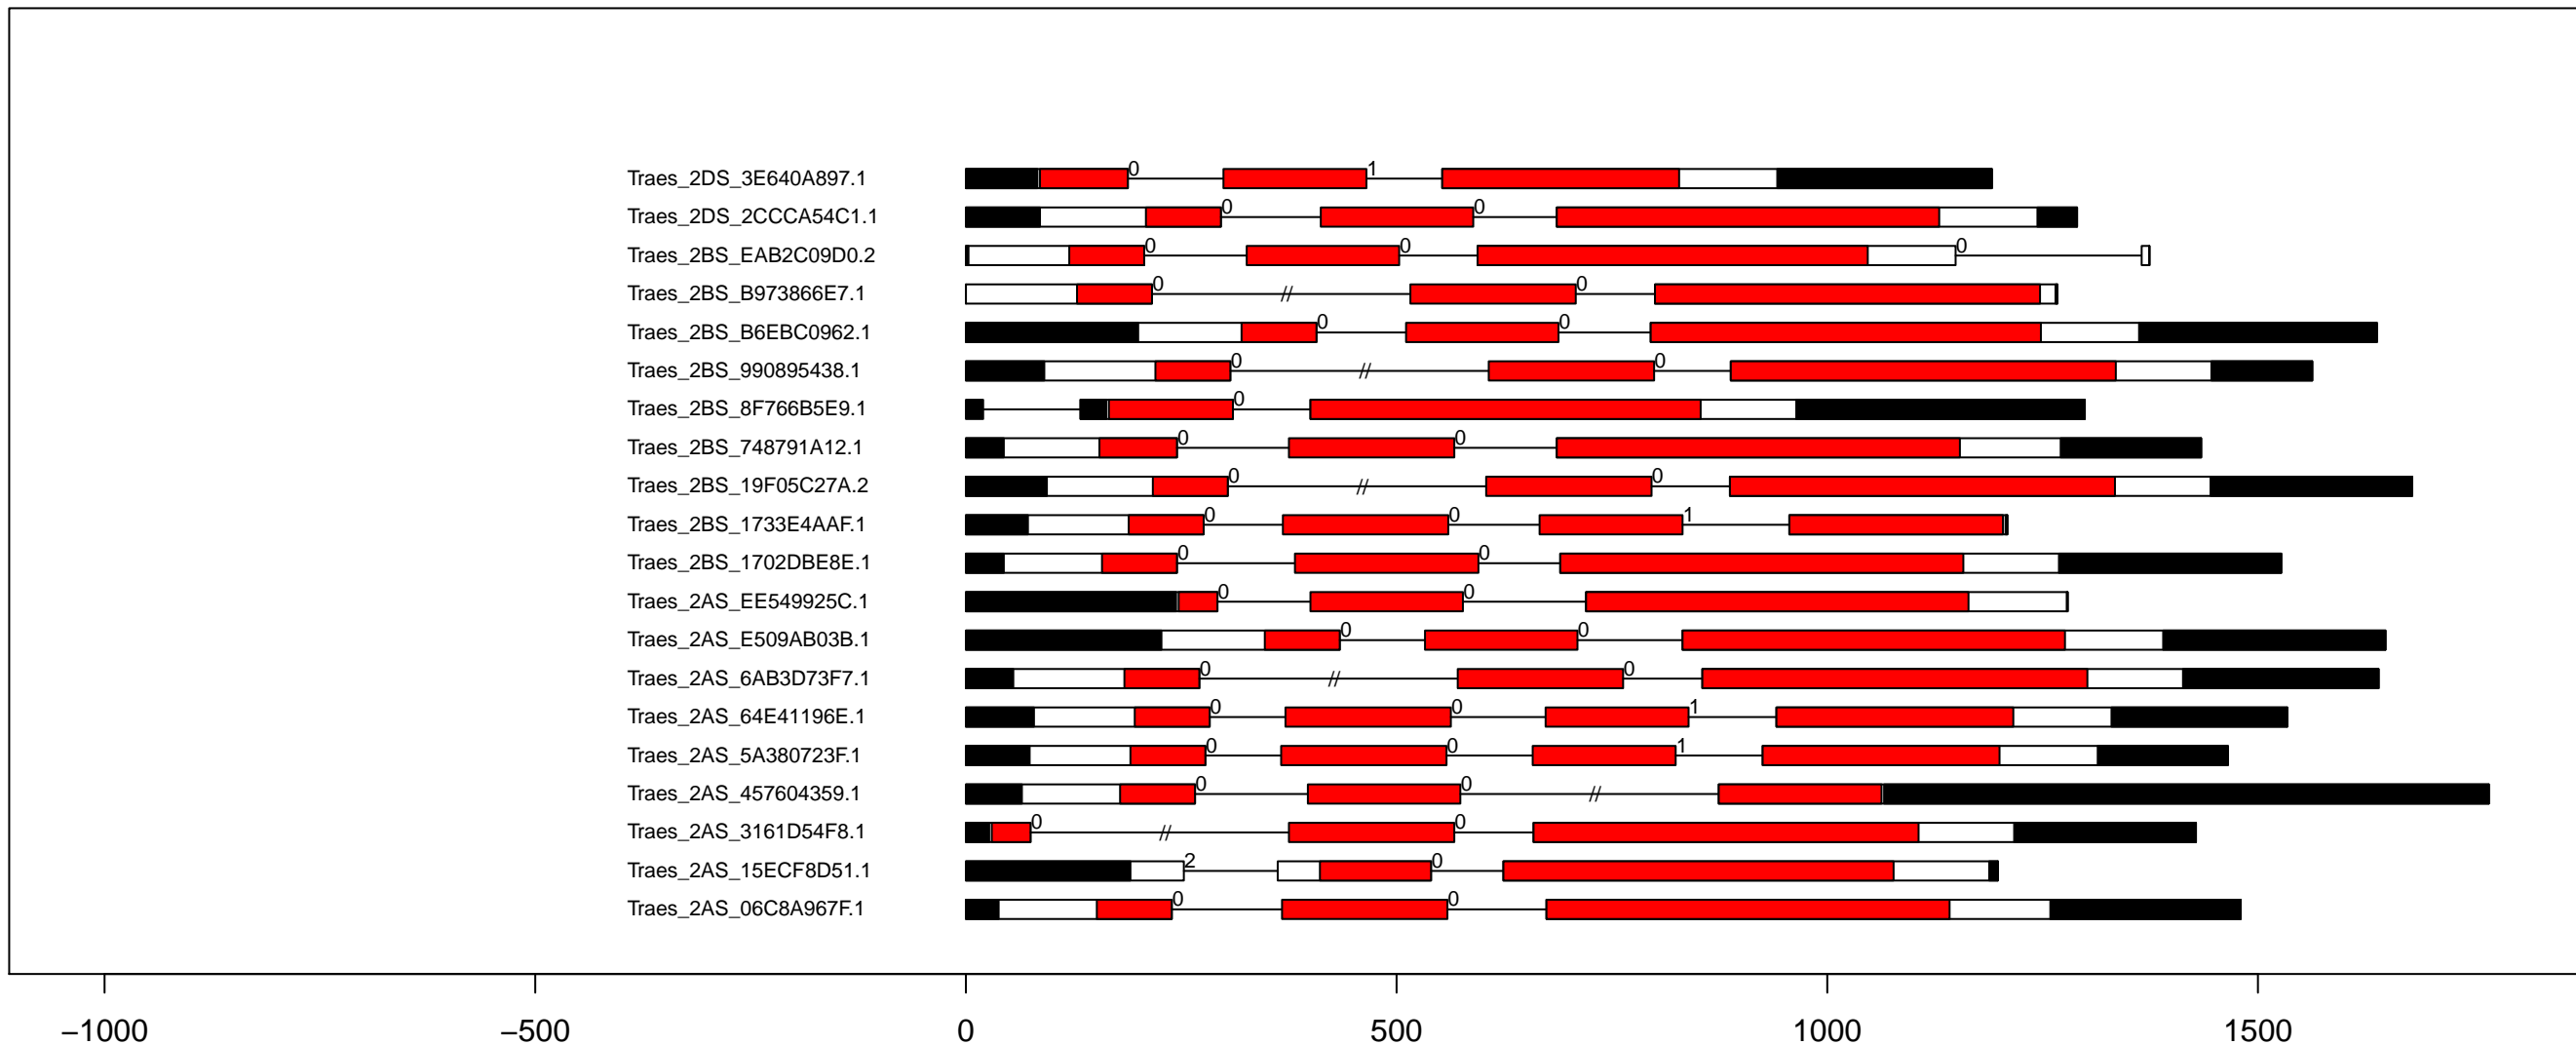



## T.ae class III peroxidase XVII subfamily exon-intron and prx domain diagram (part 2)

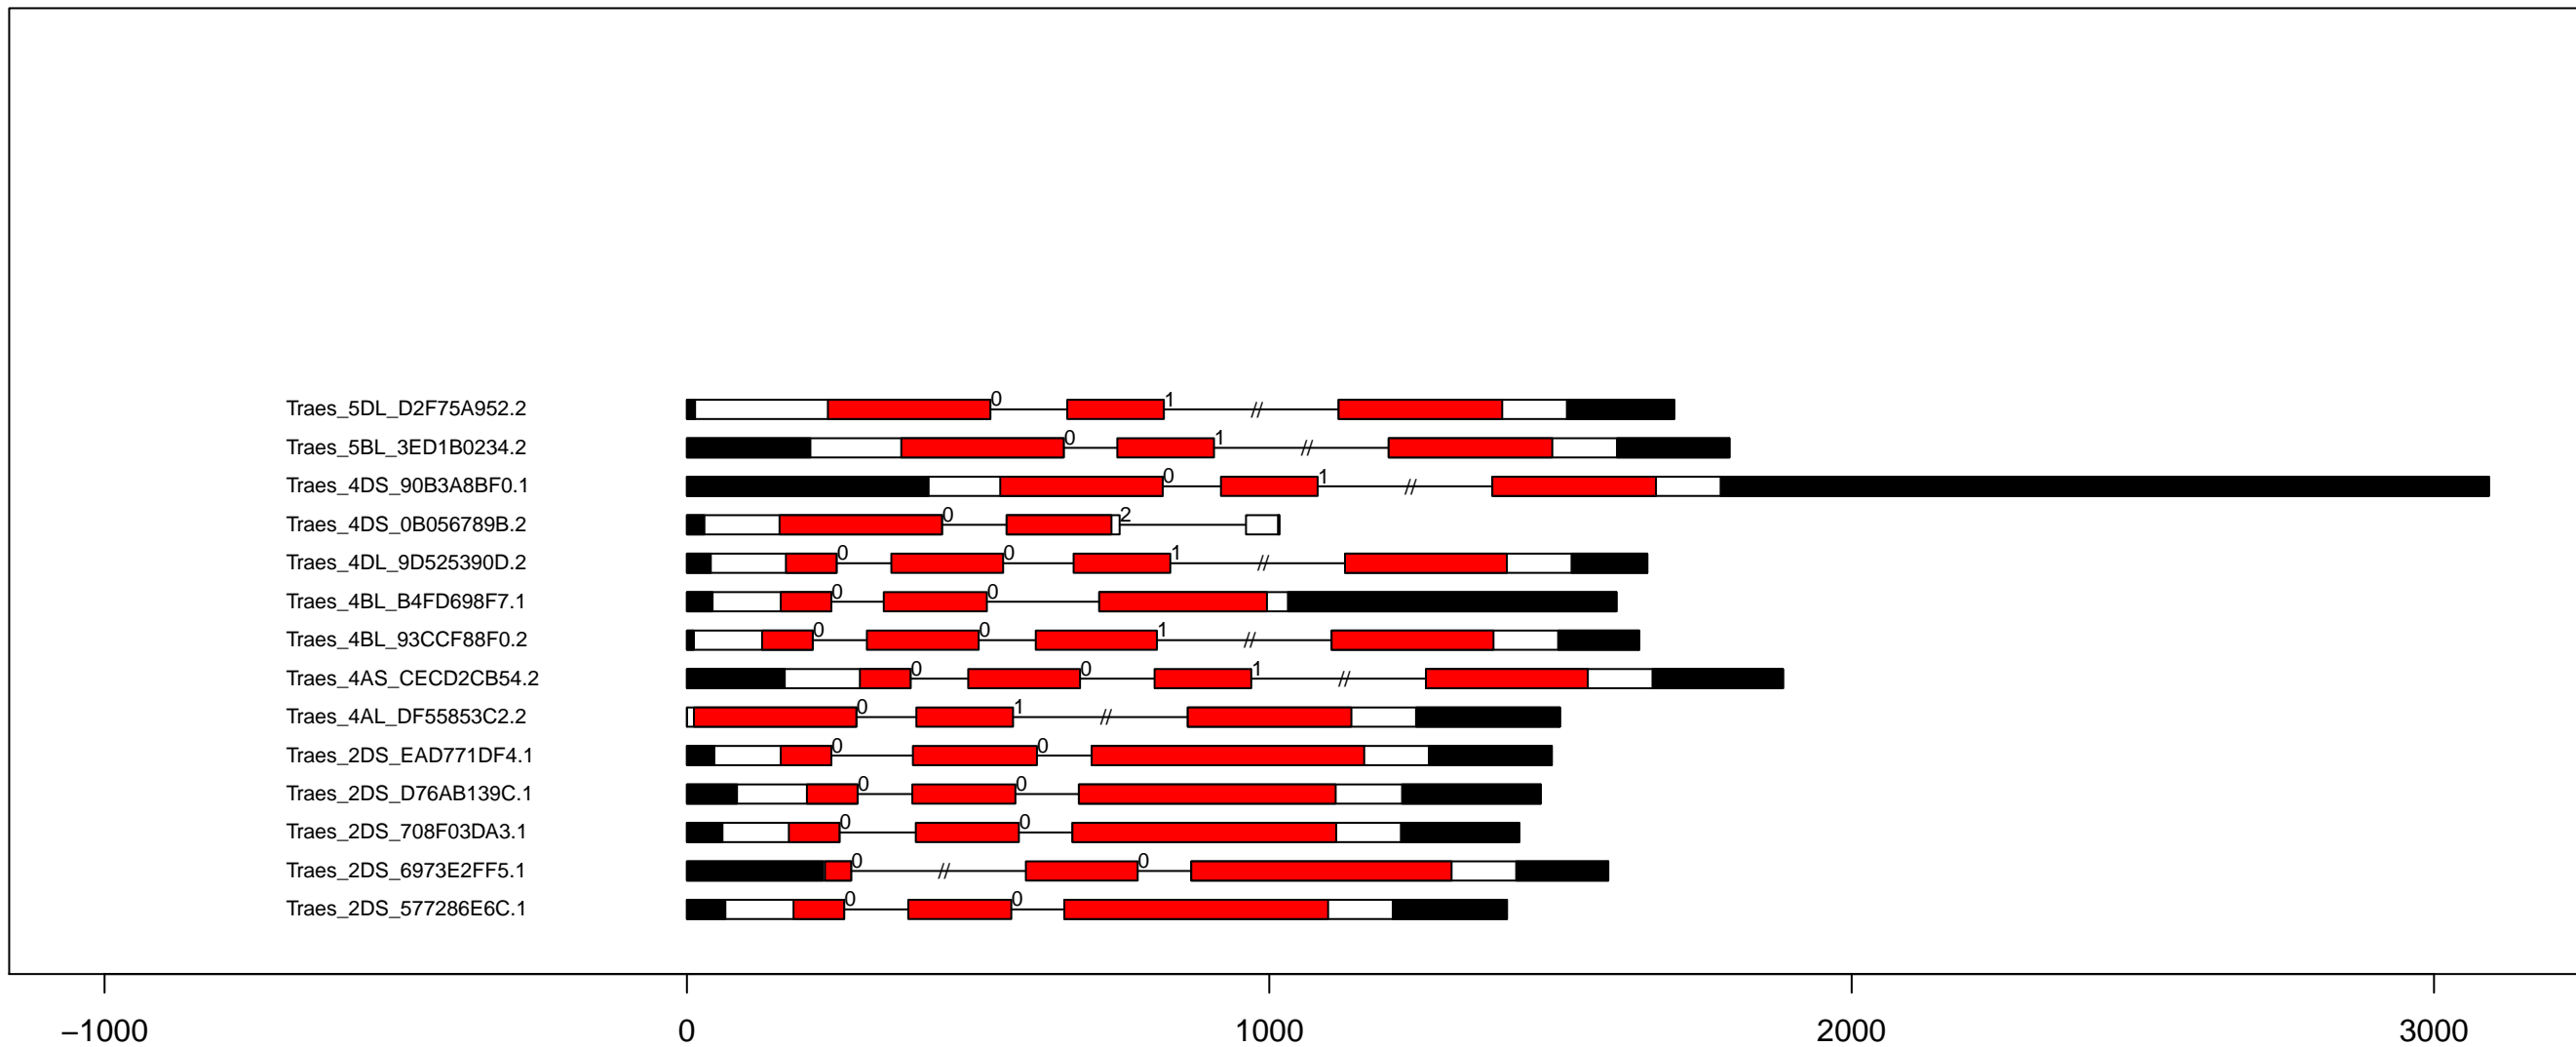

# T.ae class III peroxidase XVIII subfamily exon-intron and prx domain diagram (all)

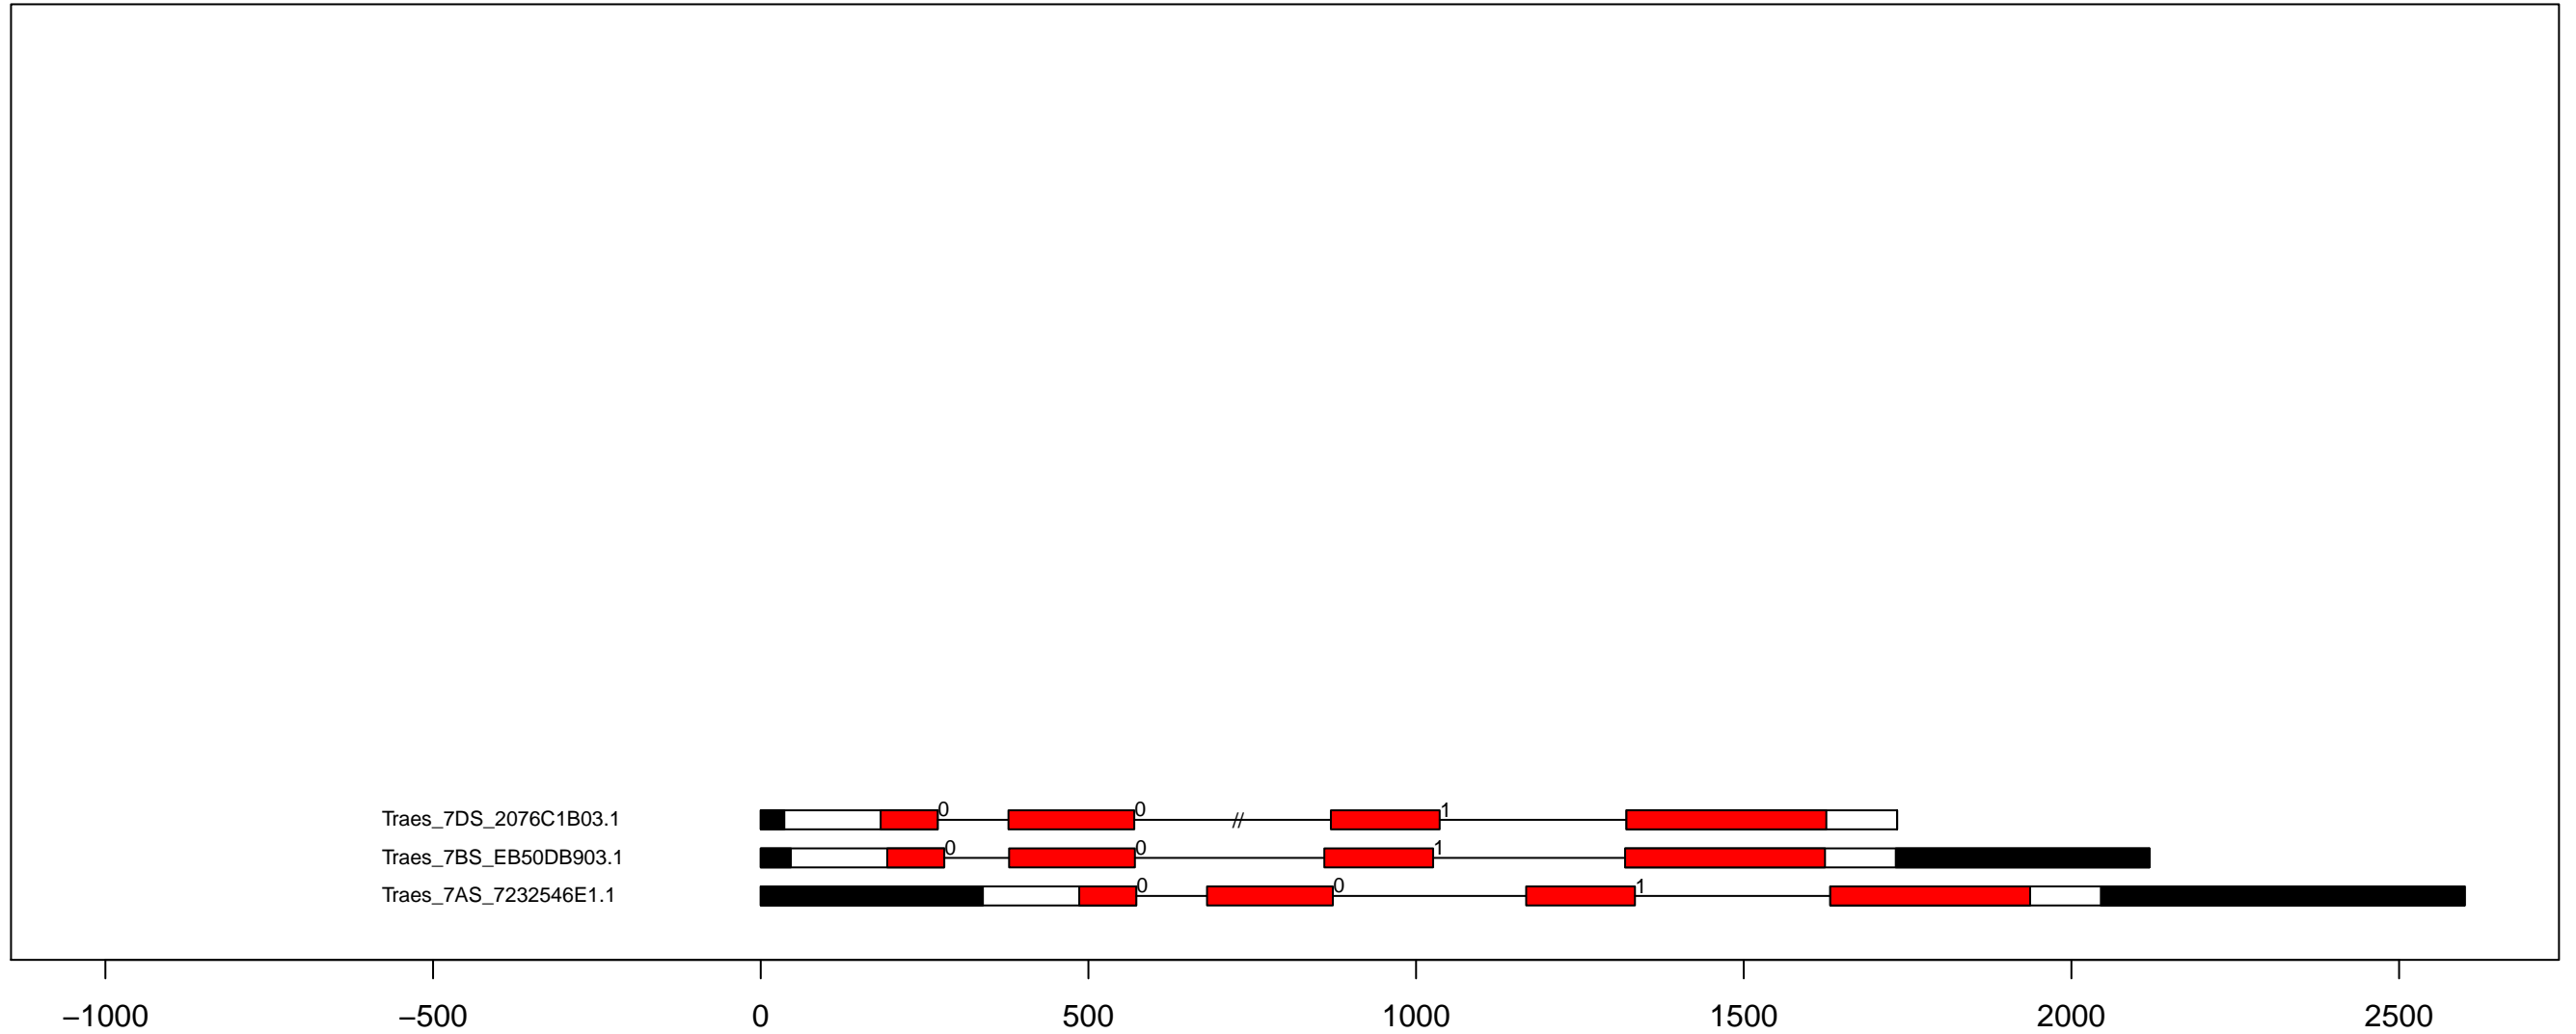



# T.ae class III peroxidase unclar\_classification subfamily exon-intron and prx domain diagram (part 2)

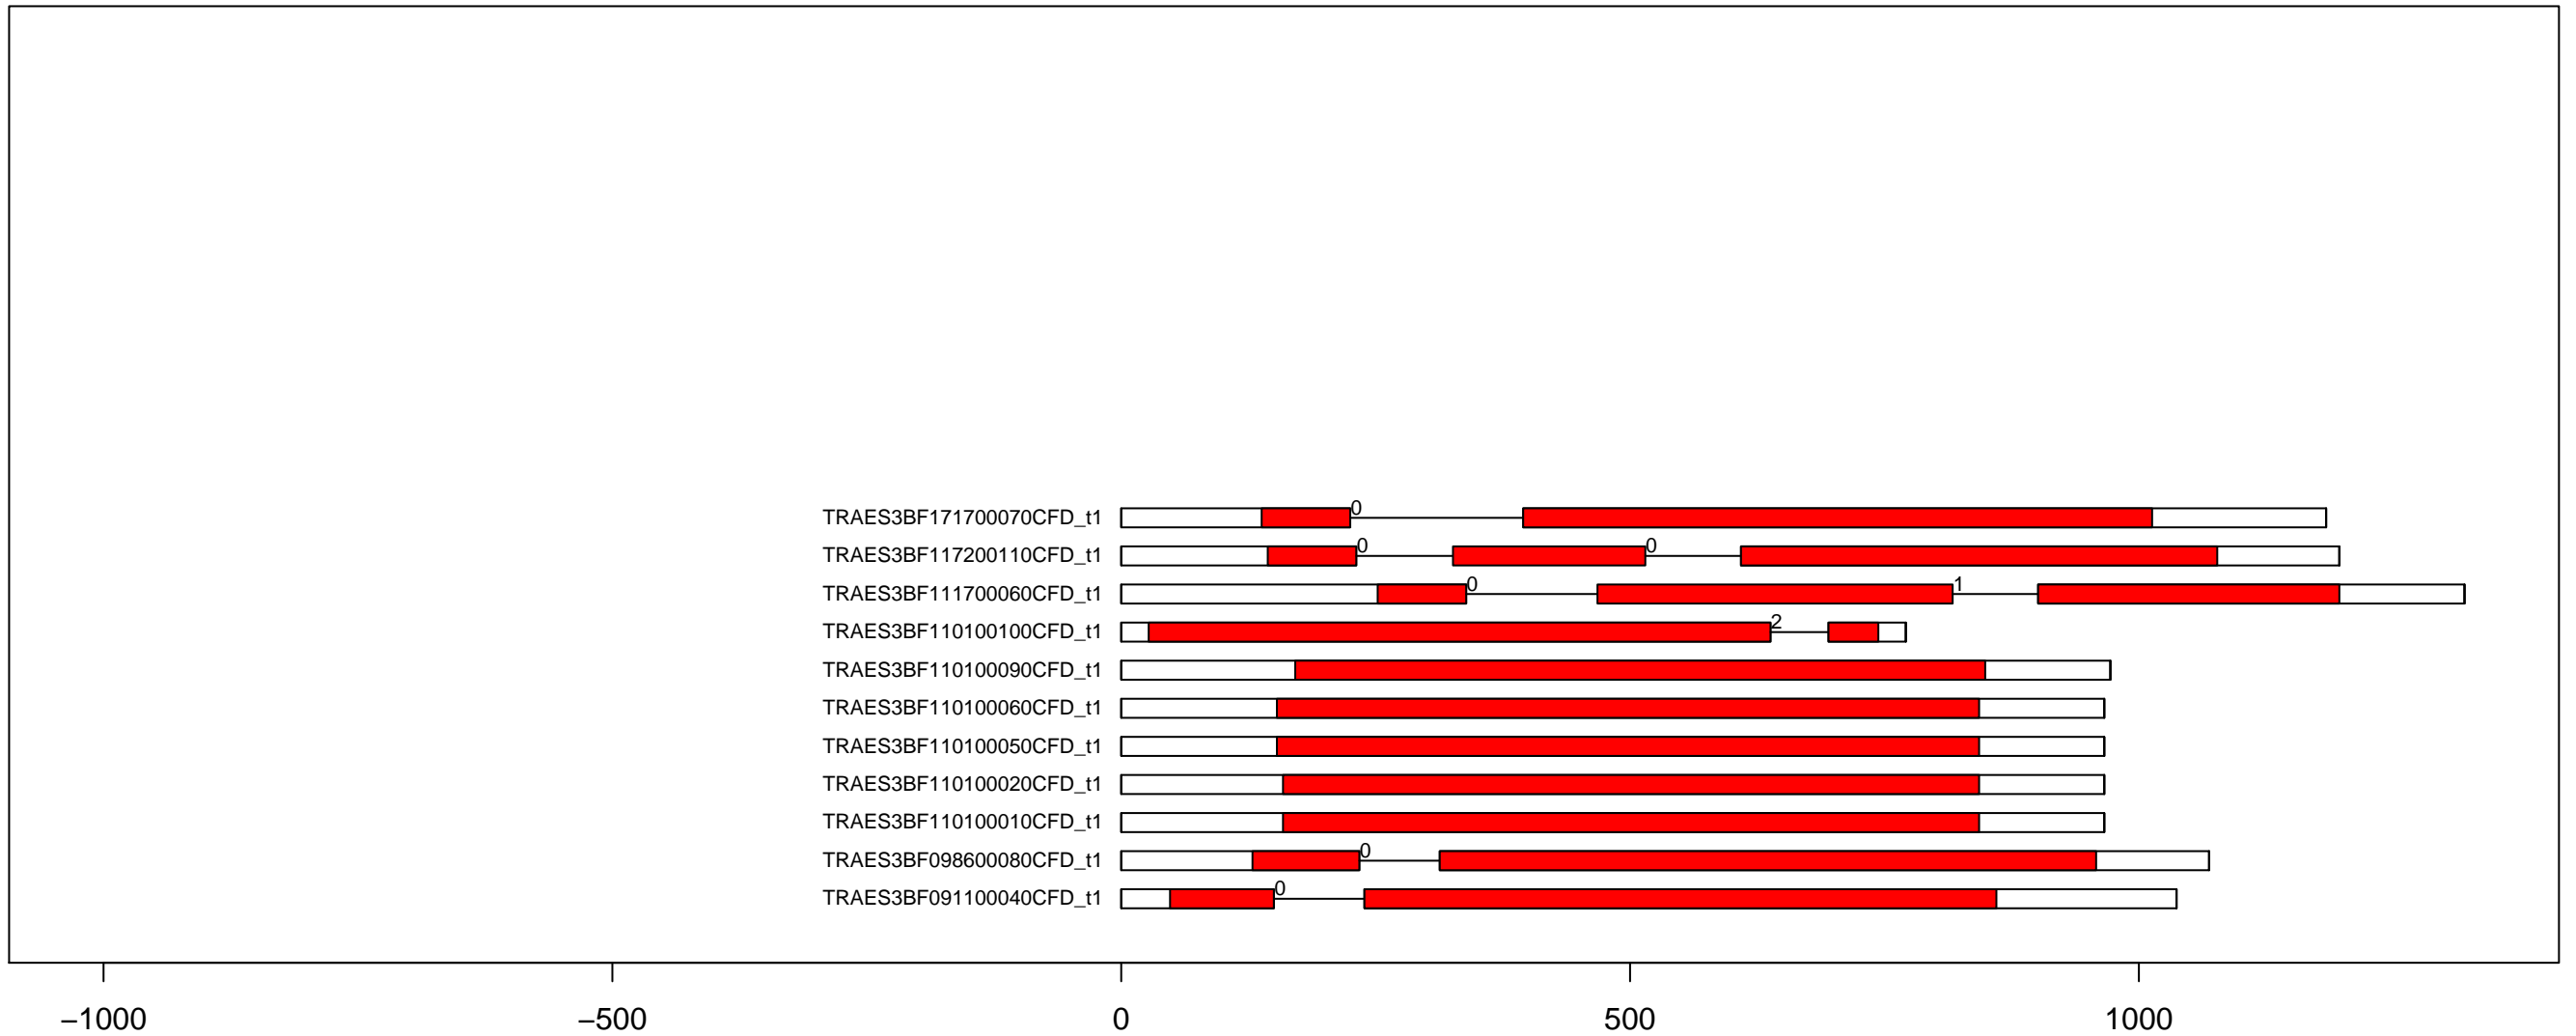

### T.ur class III peroxidase I subfamily exon-intron and prx domain diagram (part 1)

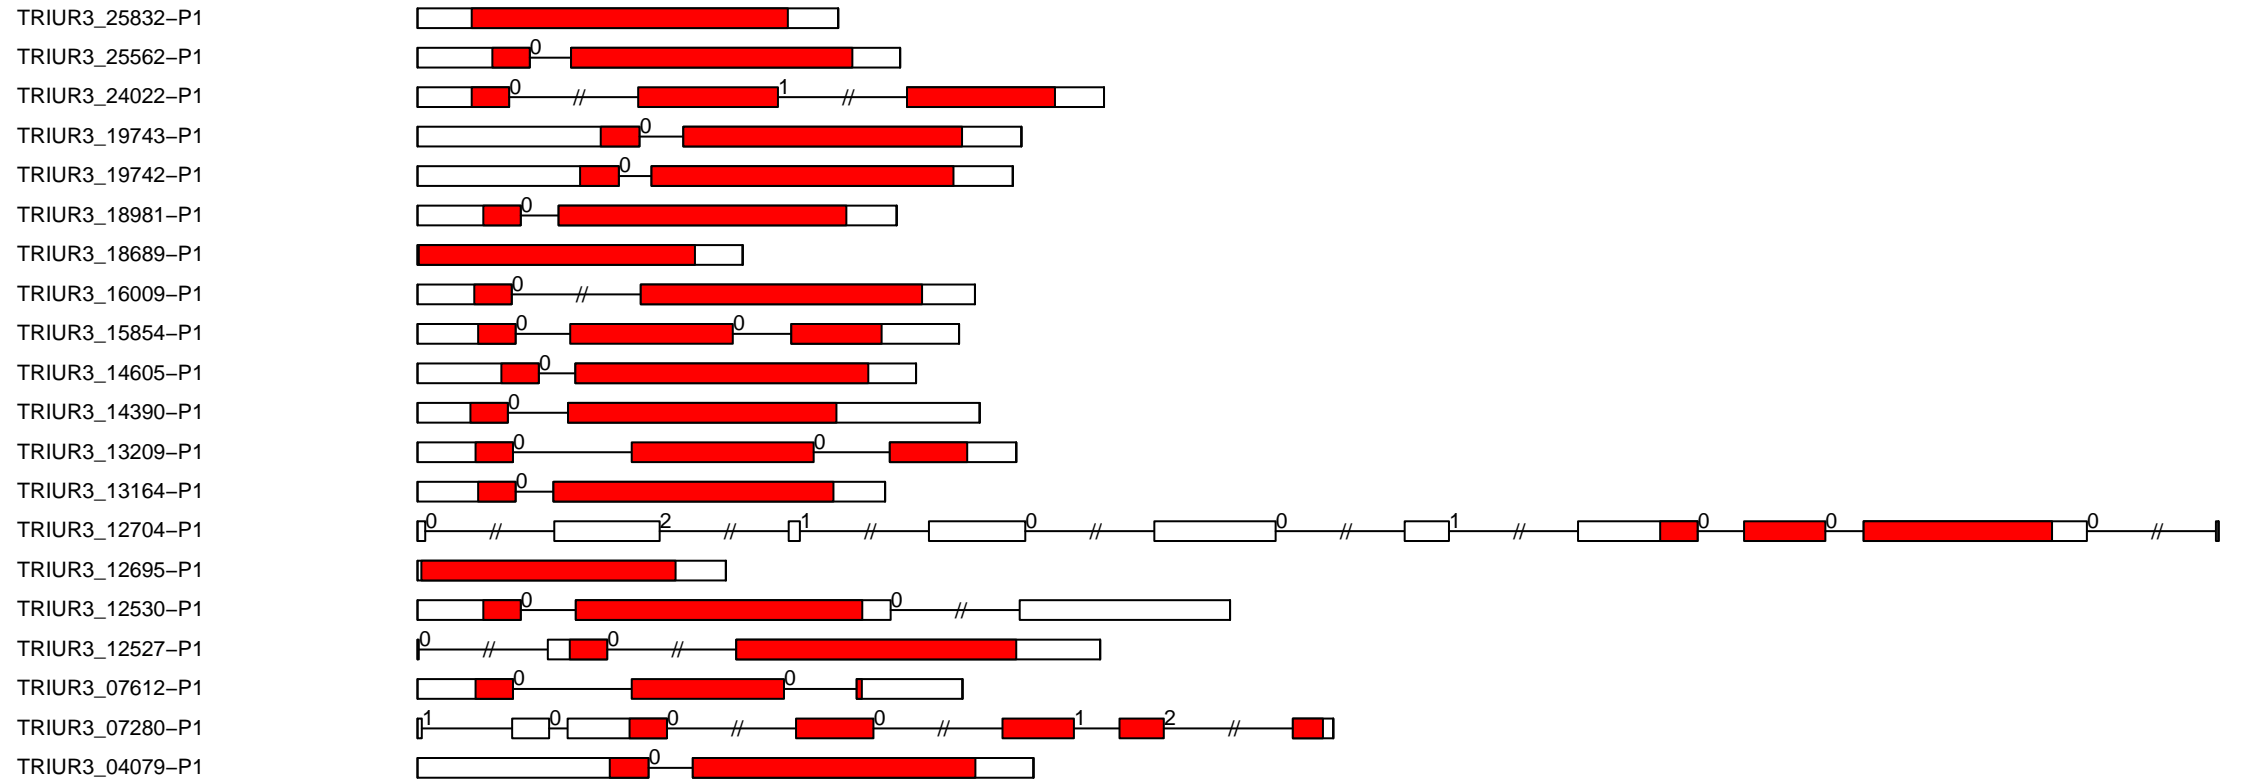

## T.ur class III peroxidase I subfamily exon-intron and prx domain diagram (part 2)

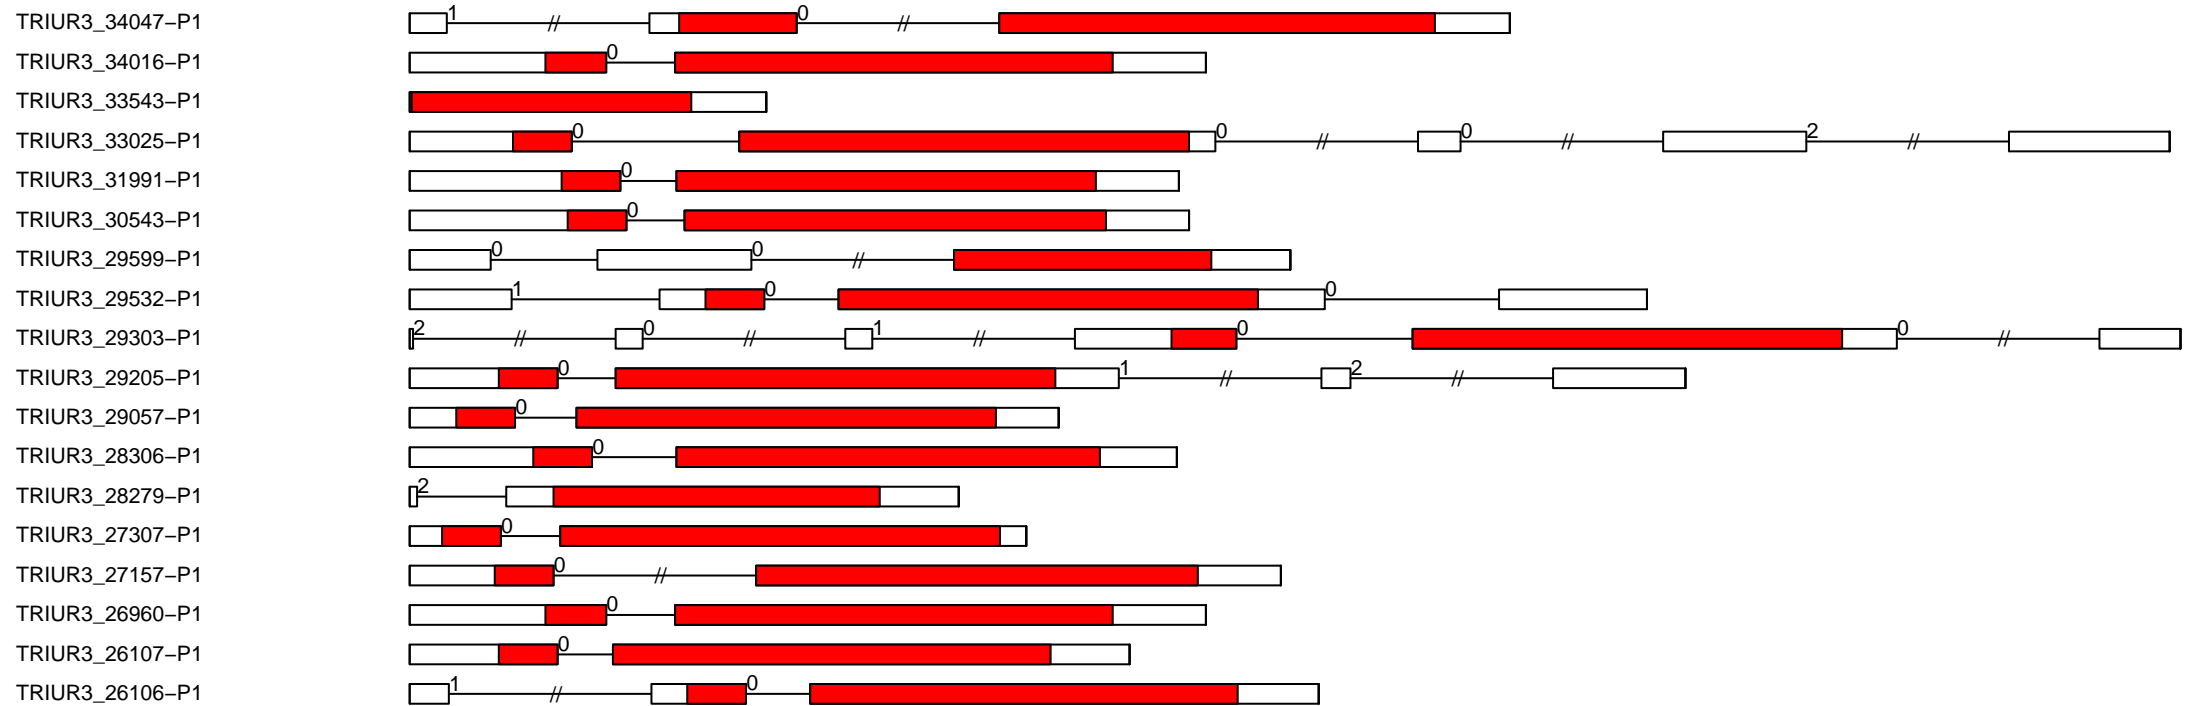

# T.ur class III peroxidase II subfamily exon-intron and prx domain diagram (all)

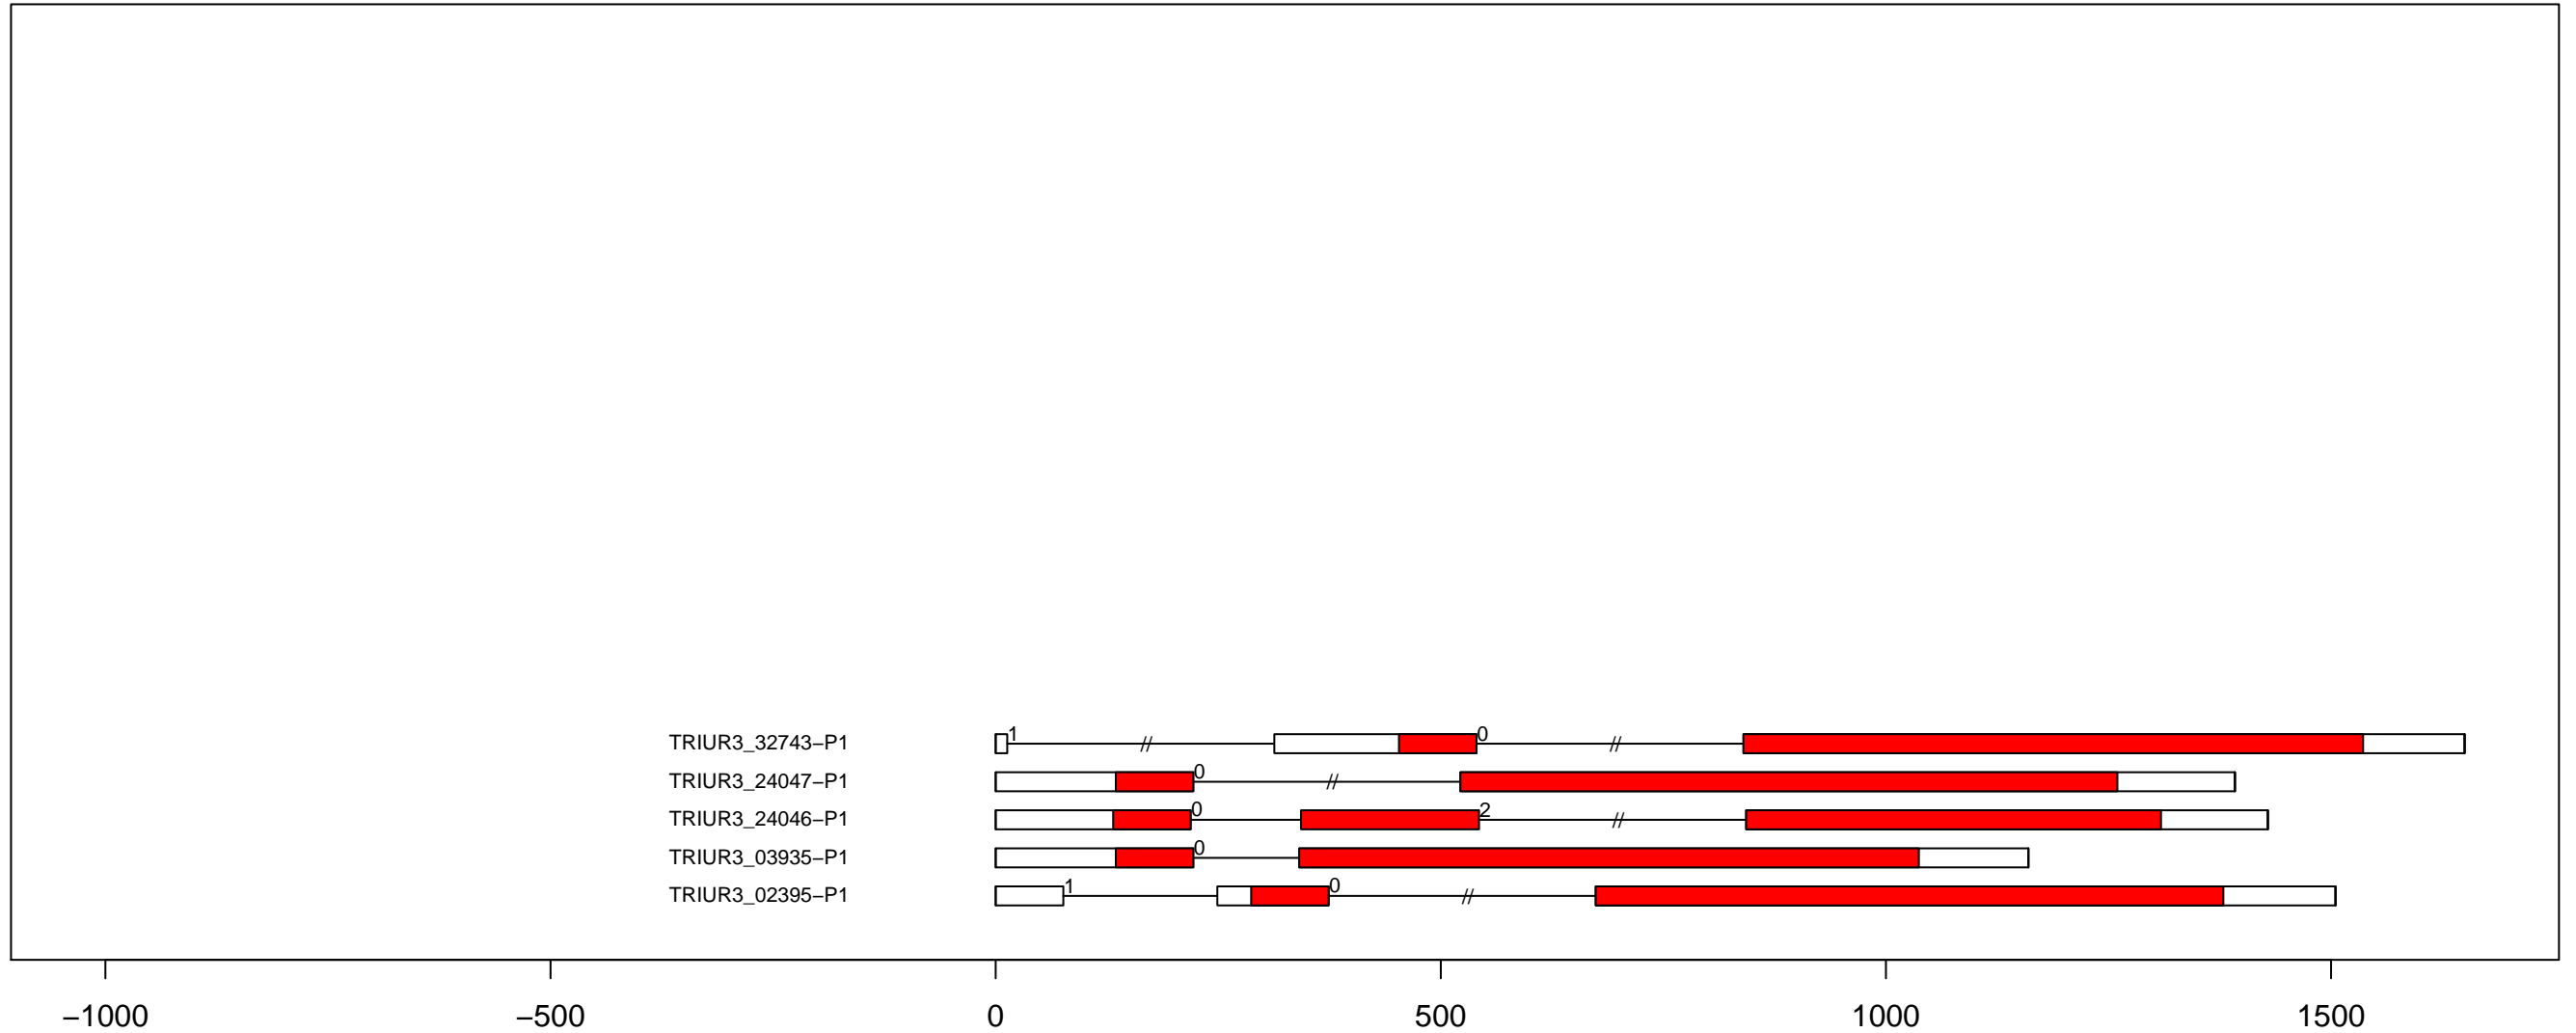

### T.ur class III peroxidase V subfamily exon-intron and prx domain diagram (part 1)

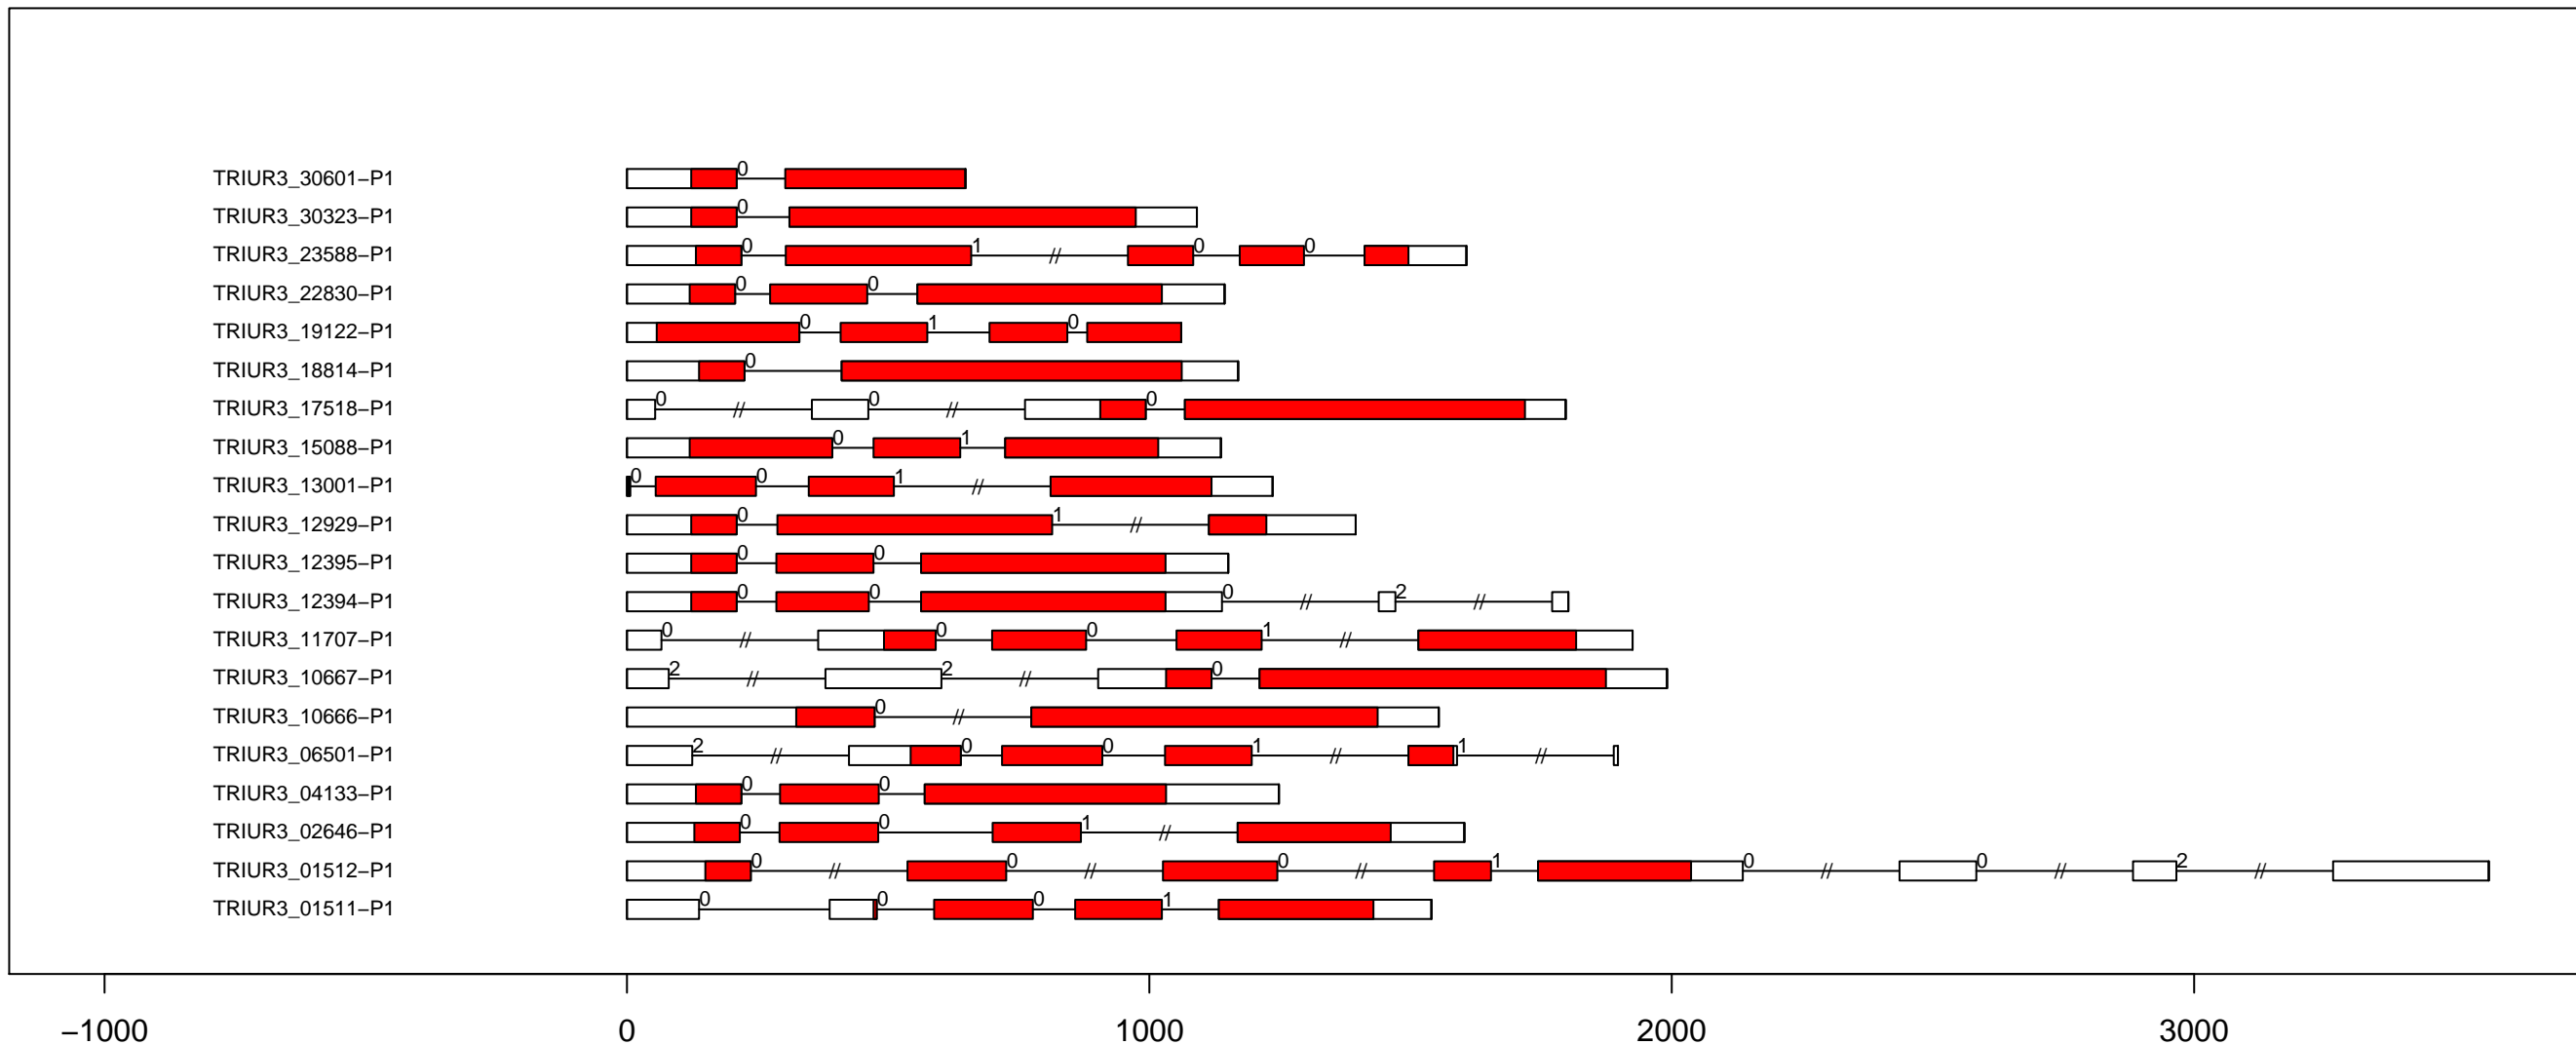



# T.ur class III peroxidase V subfamily exon-intron and prx domain diagram (part 2)

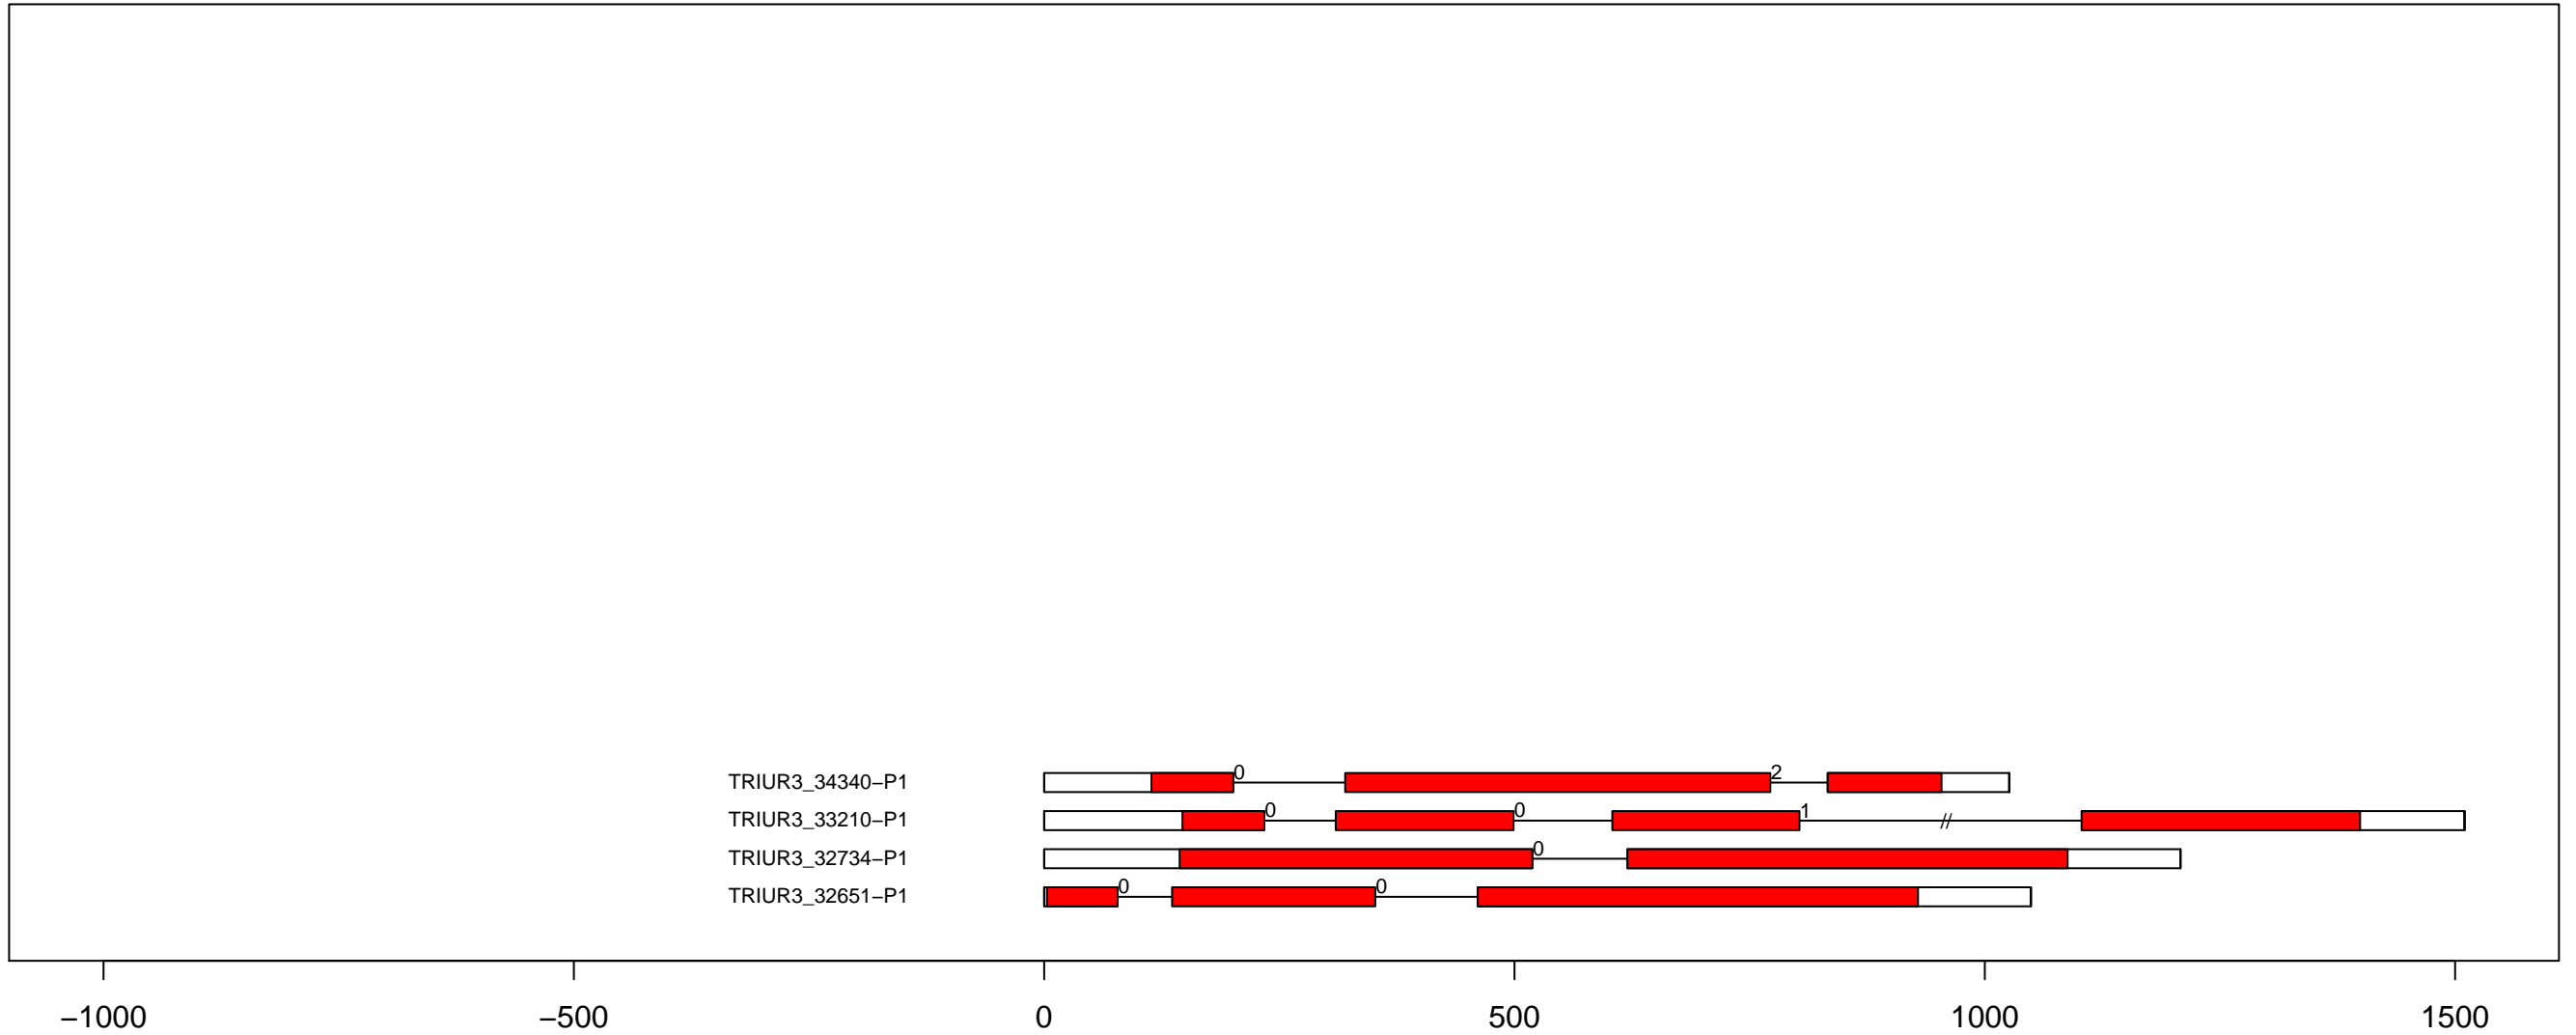





### T.ur class III peroxidase IX subfamily exon-intron and prx domain diagram (all)

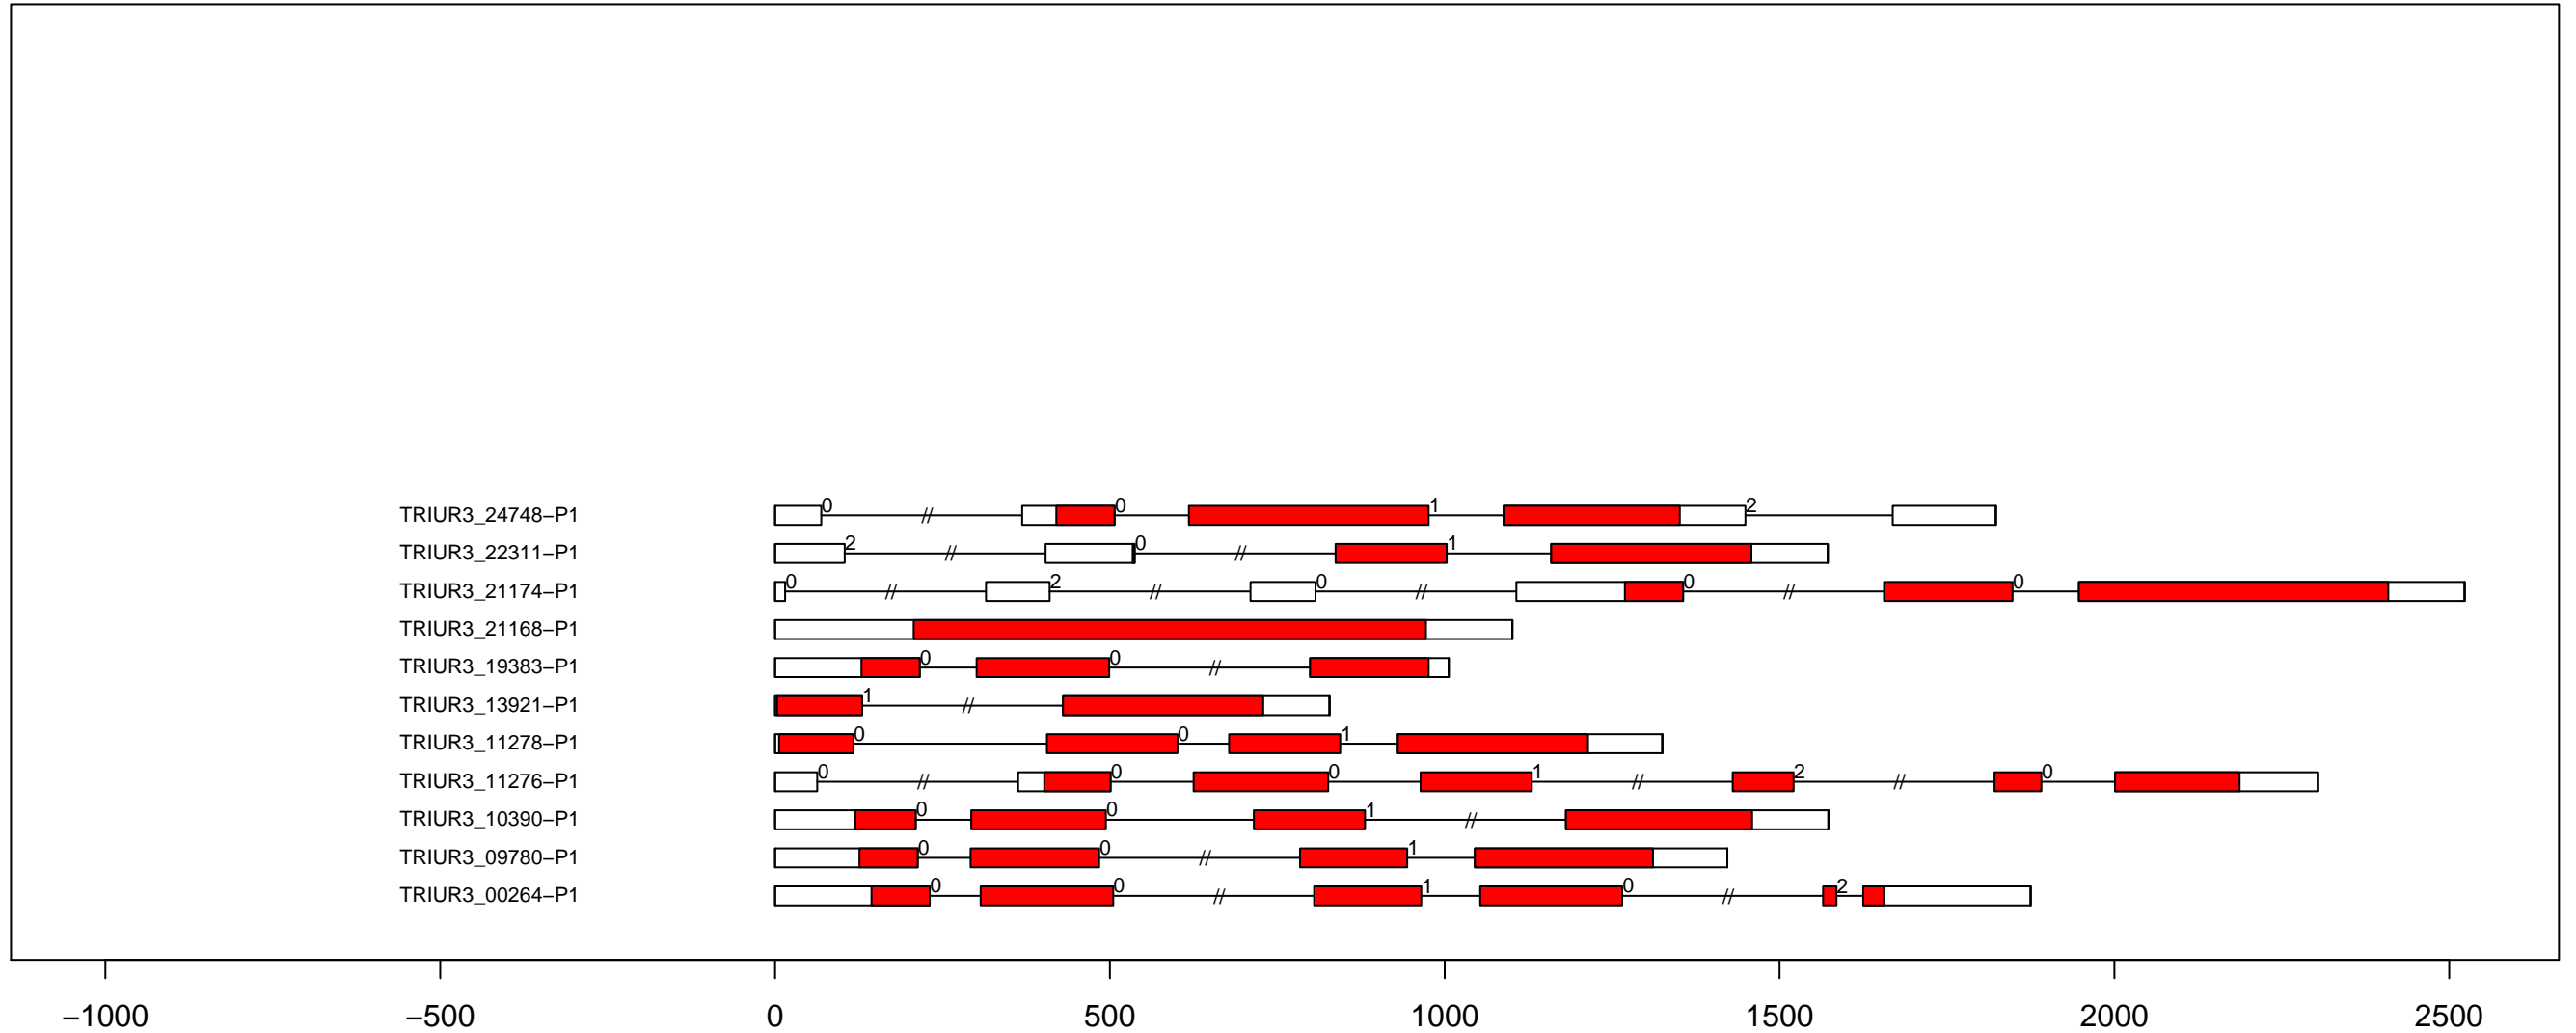

# T.ur class III peroxidase X subfamily exon-intron and prx domain diagram (all)

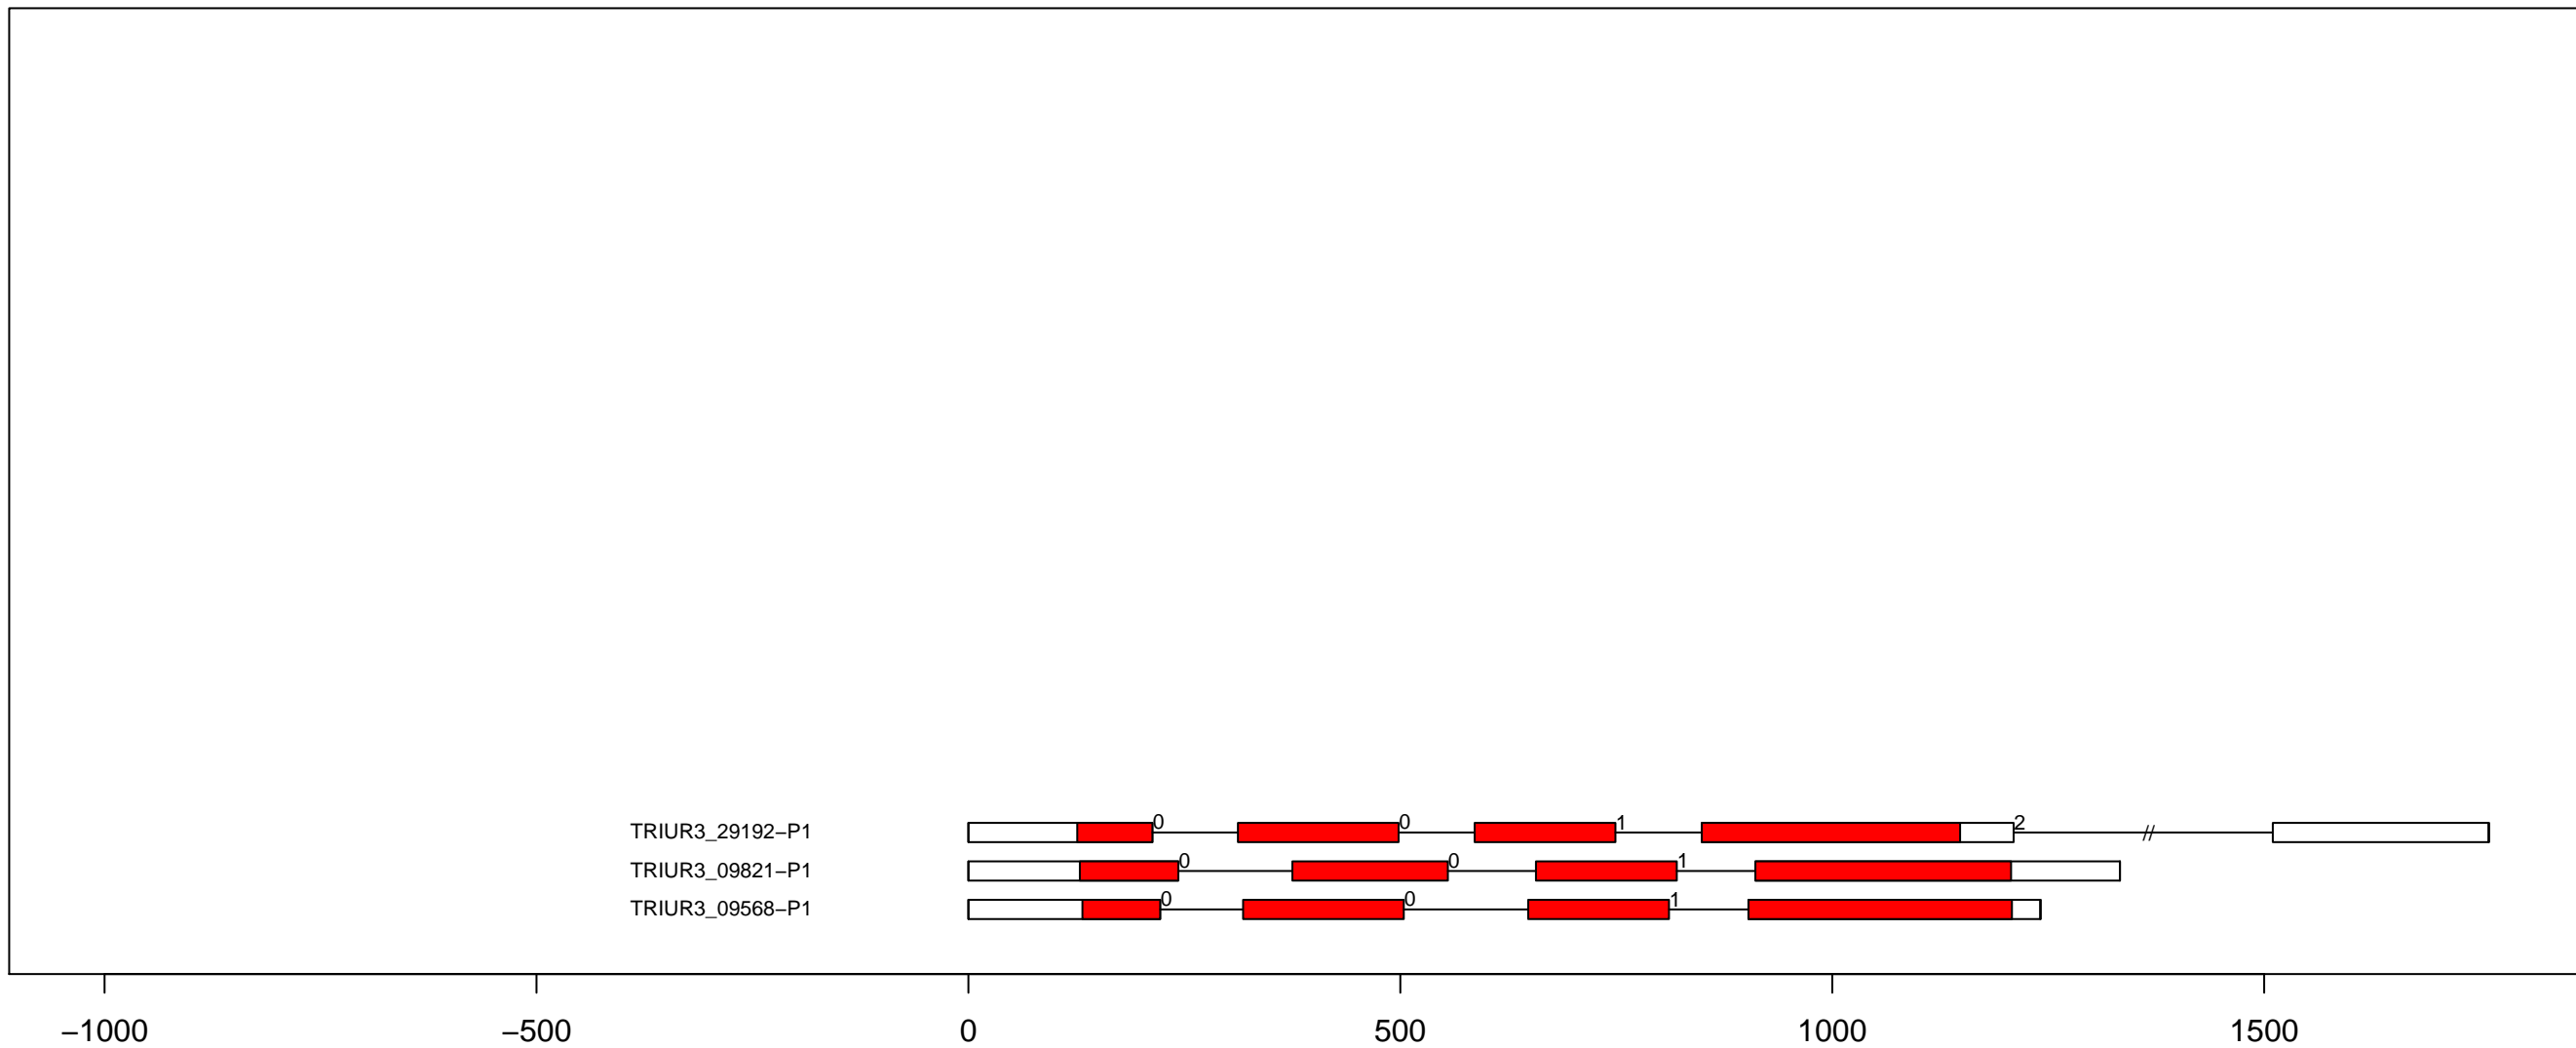

### T.ur class III peroxidase XII subfamily exon-intron and prx domain diagram (all)

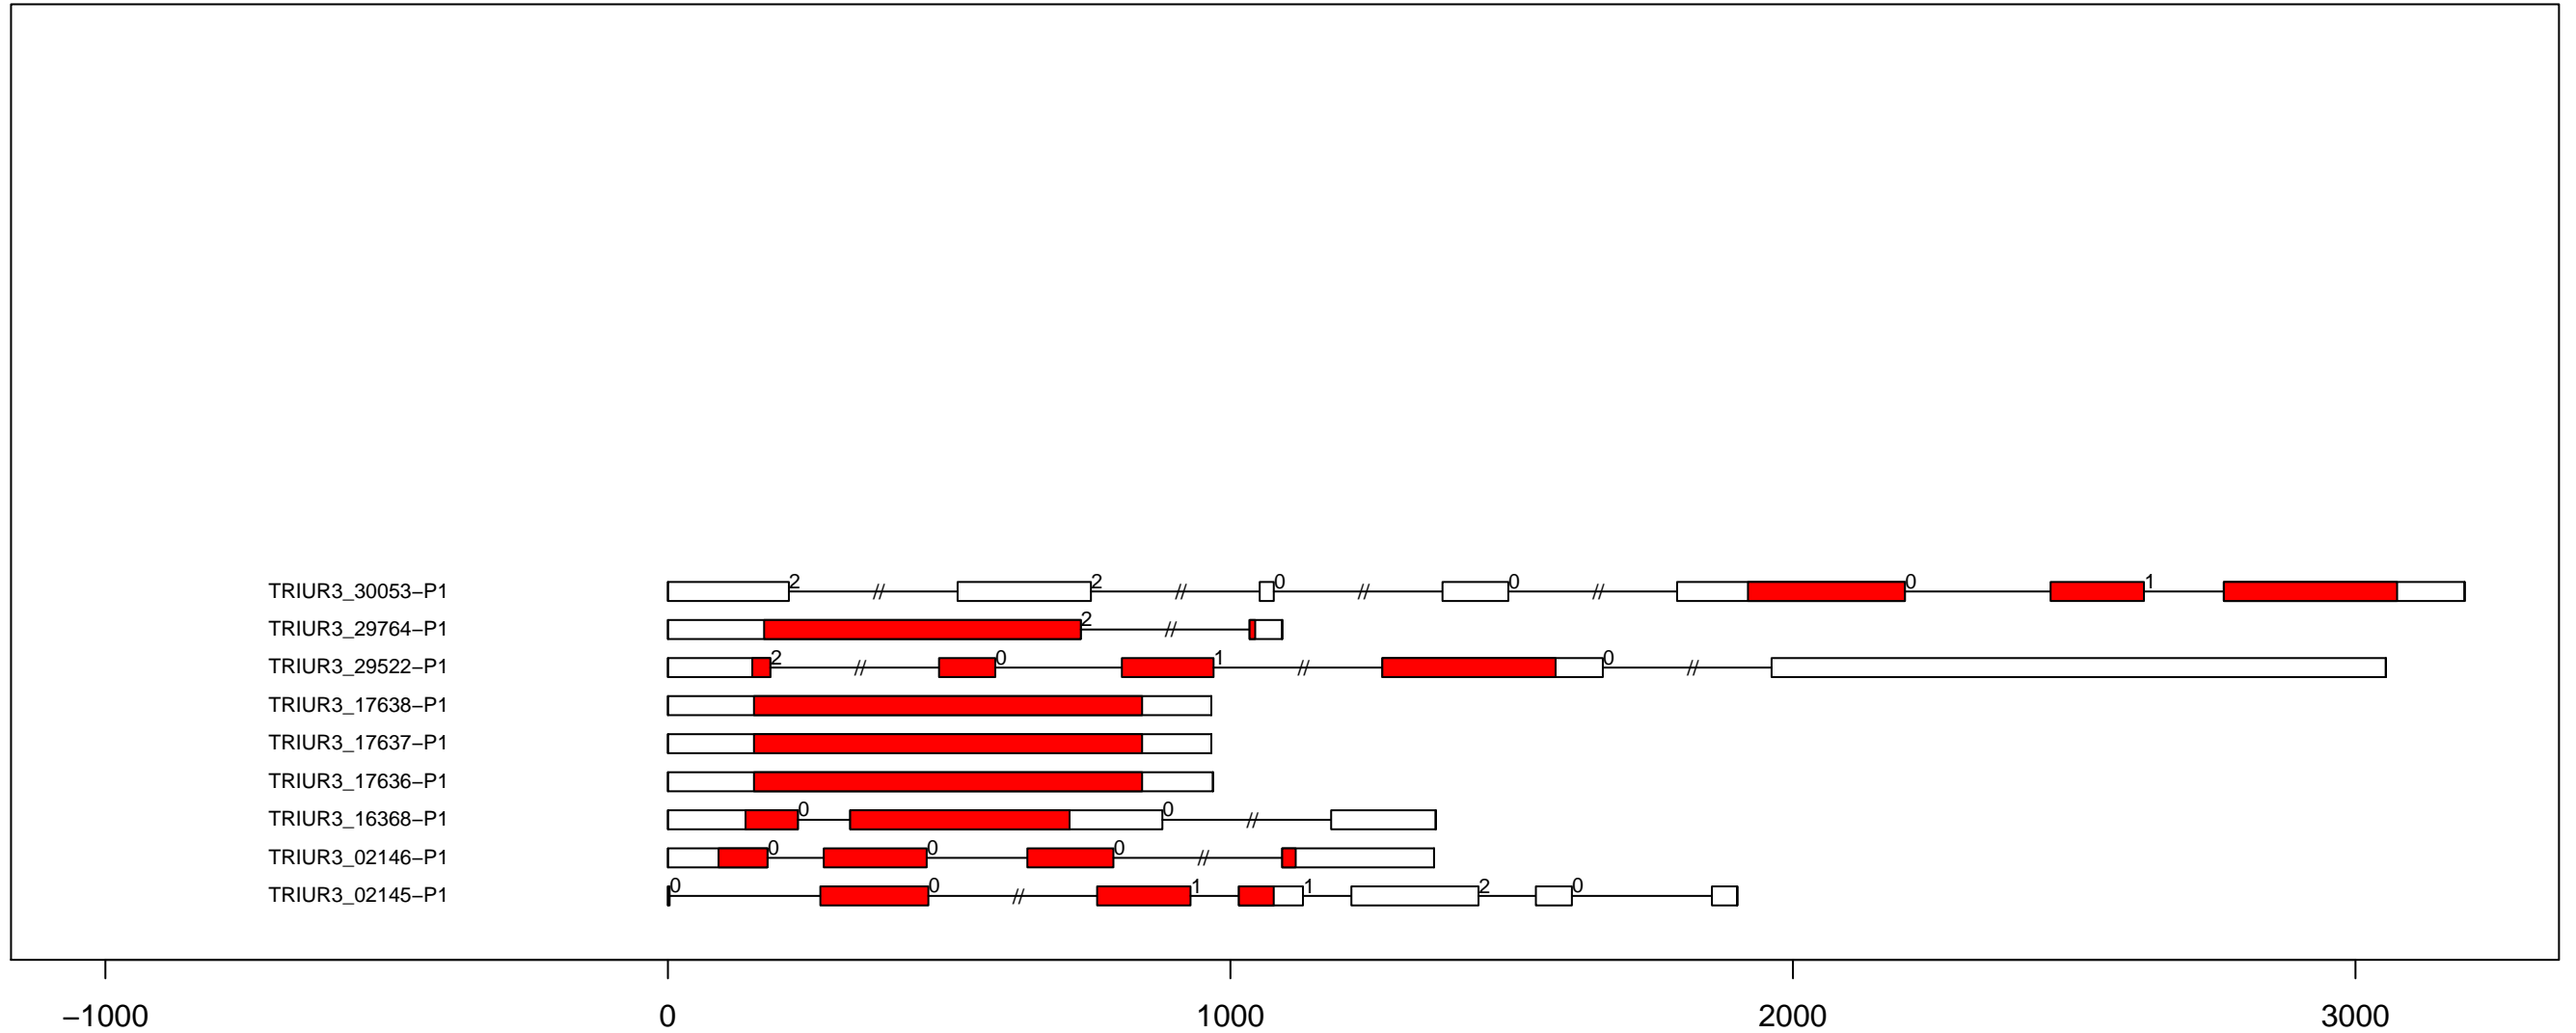

# T.ur class III peroxidase XIV subfamily exon-intron and prx domain diagram (all)

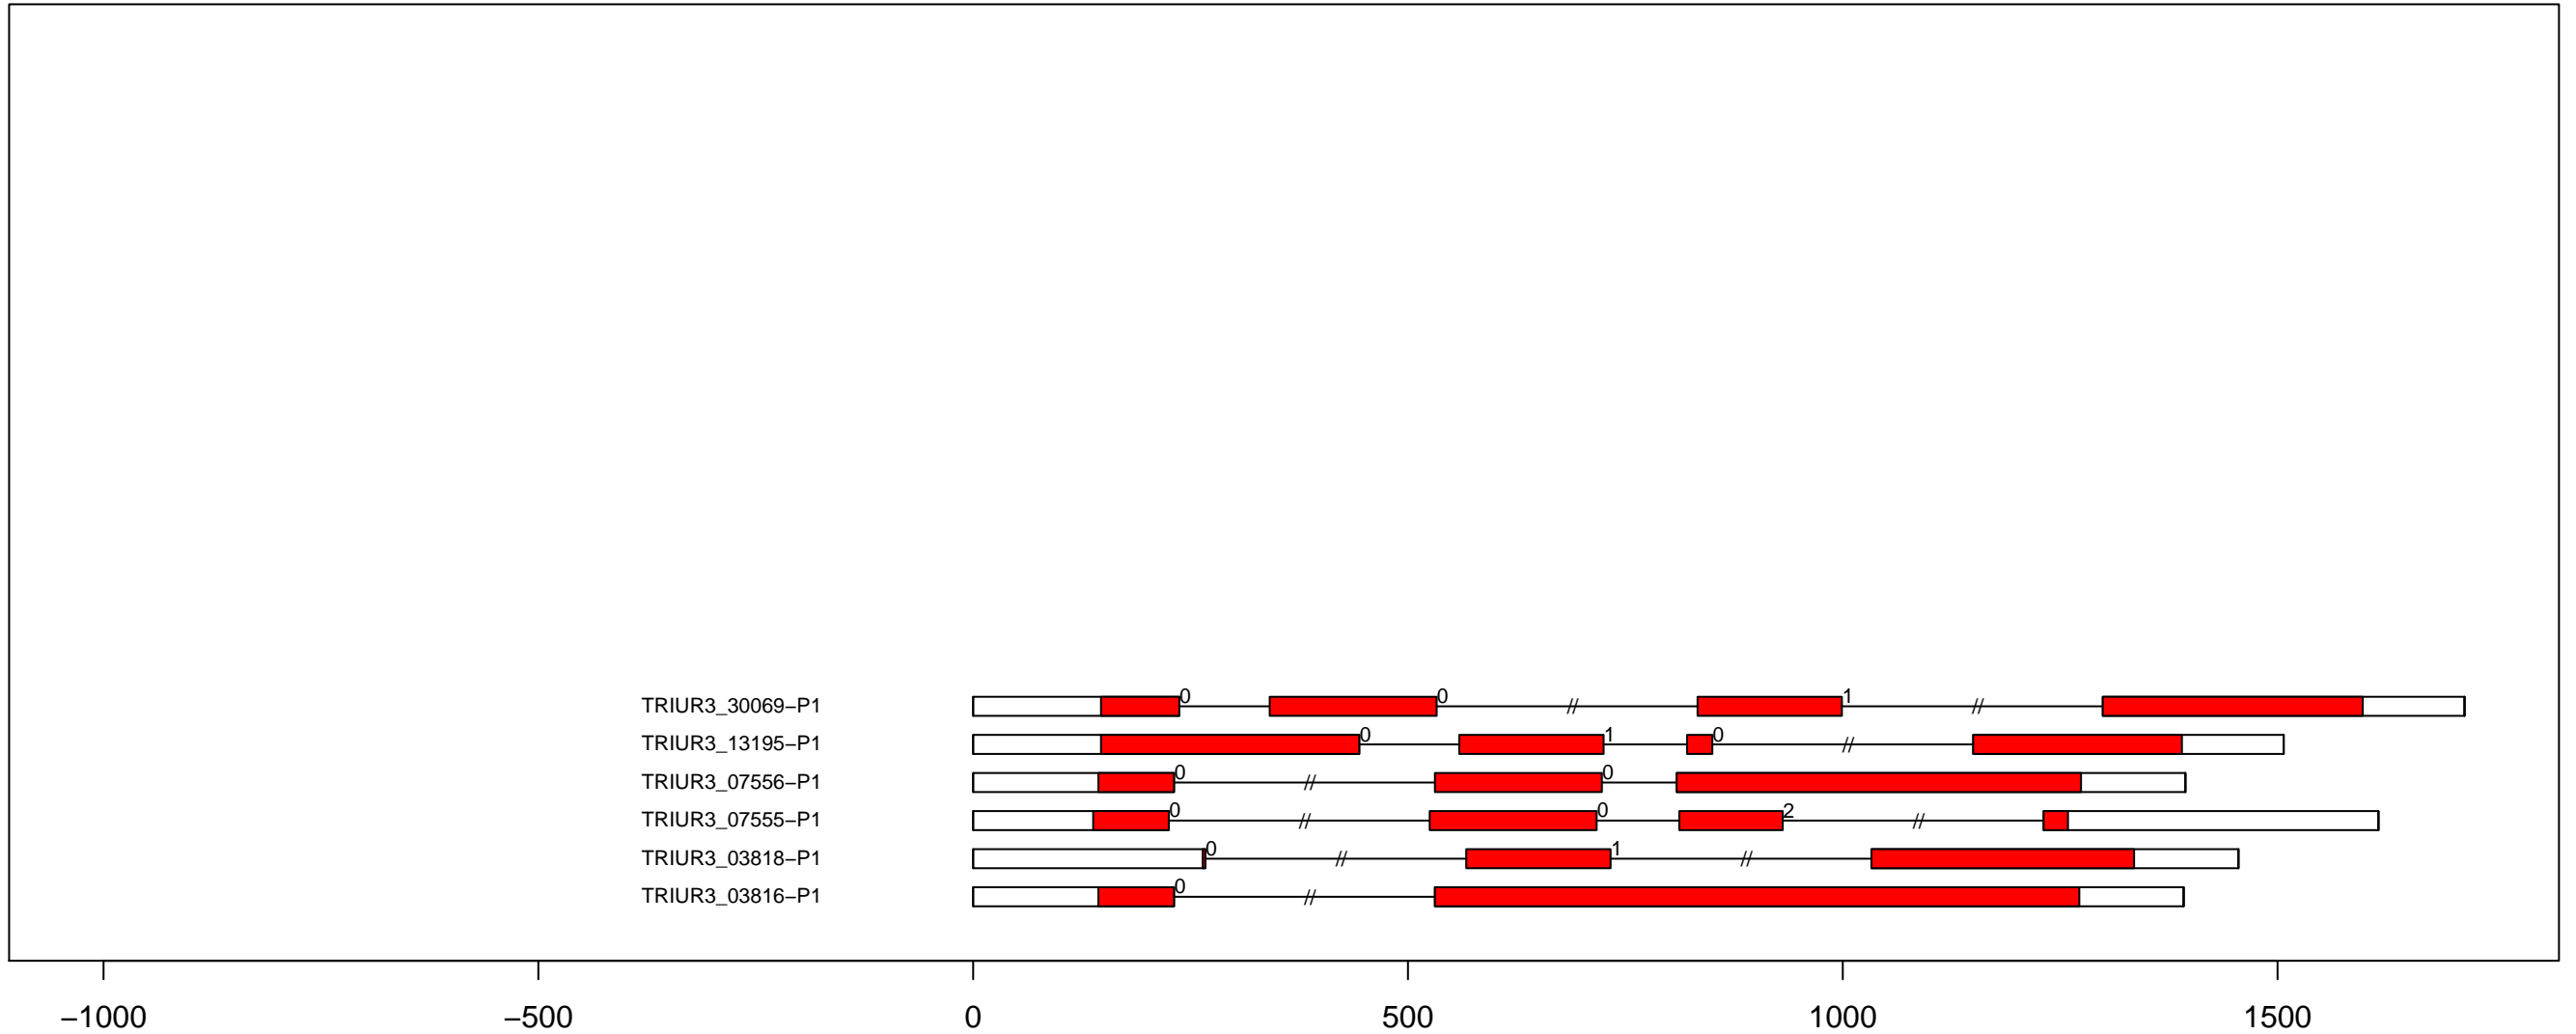

# T.ur class III peroxidase XV subfamily exon-intron and prx domain diagram (all)

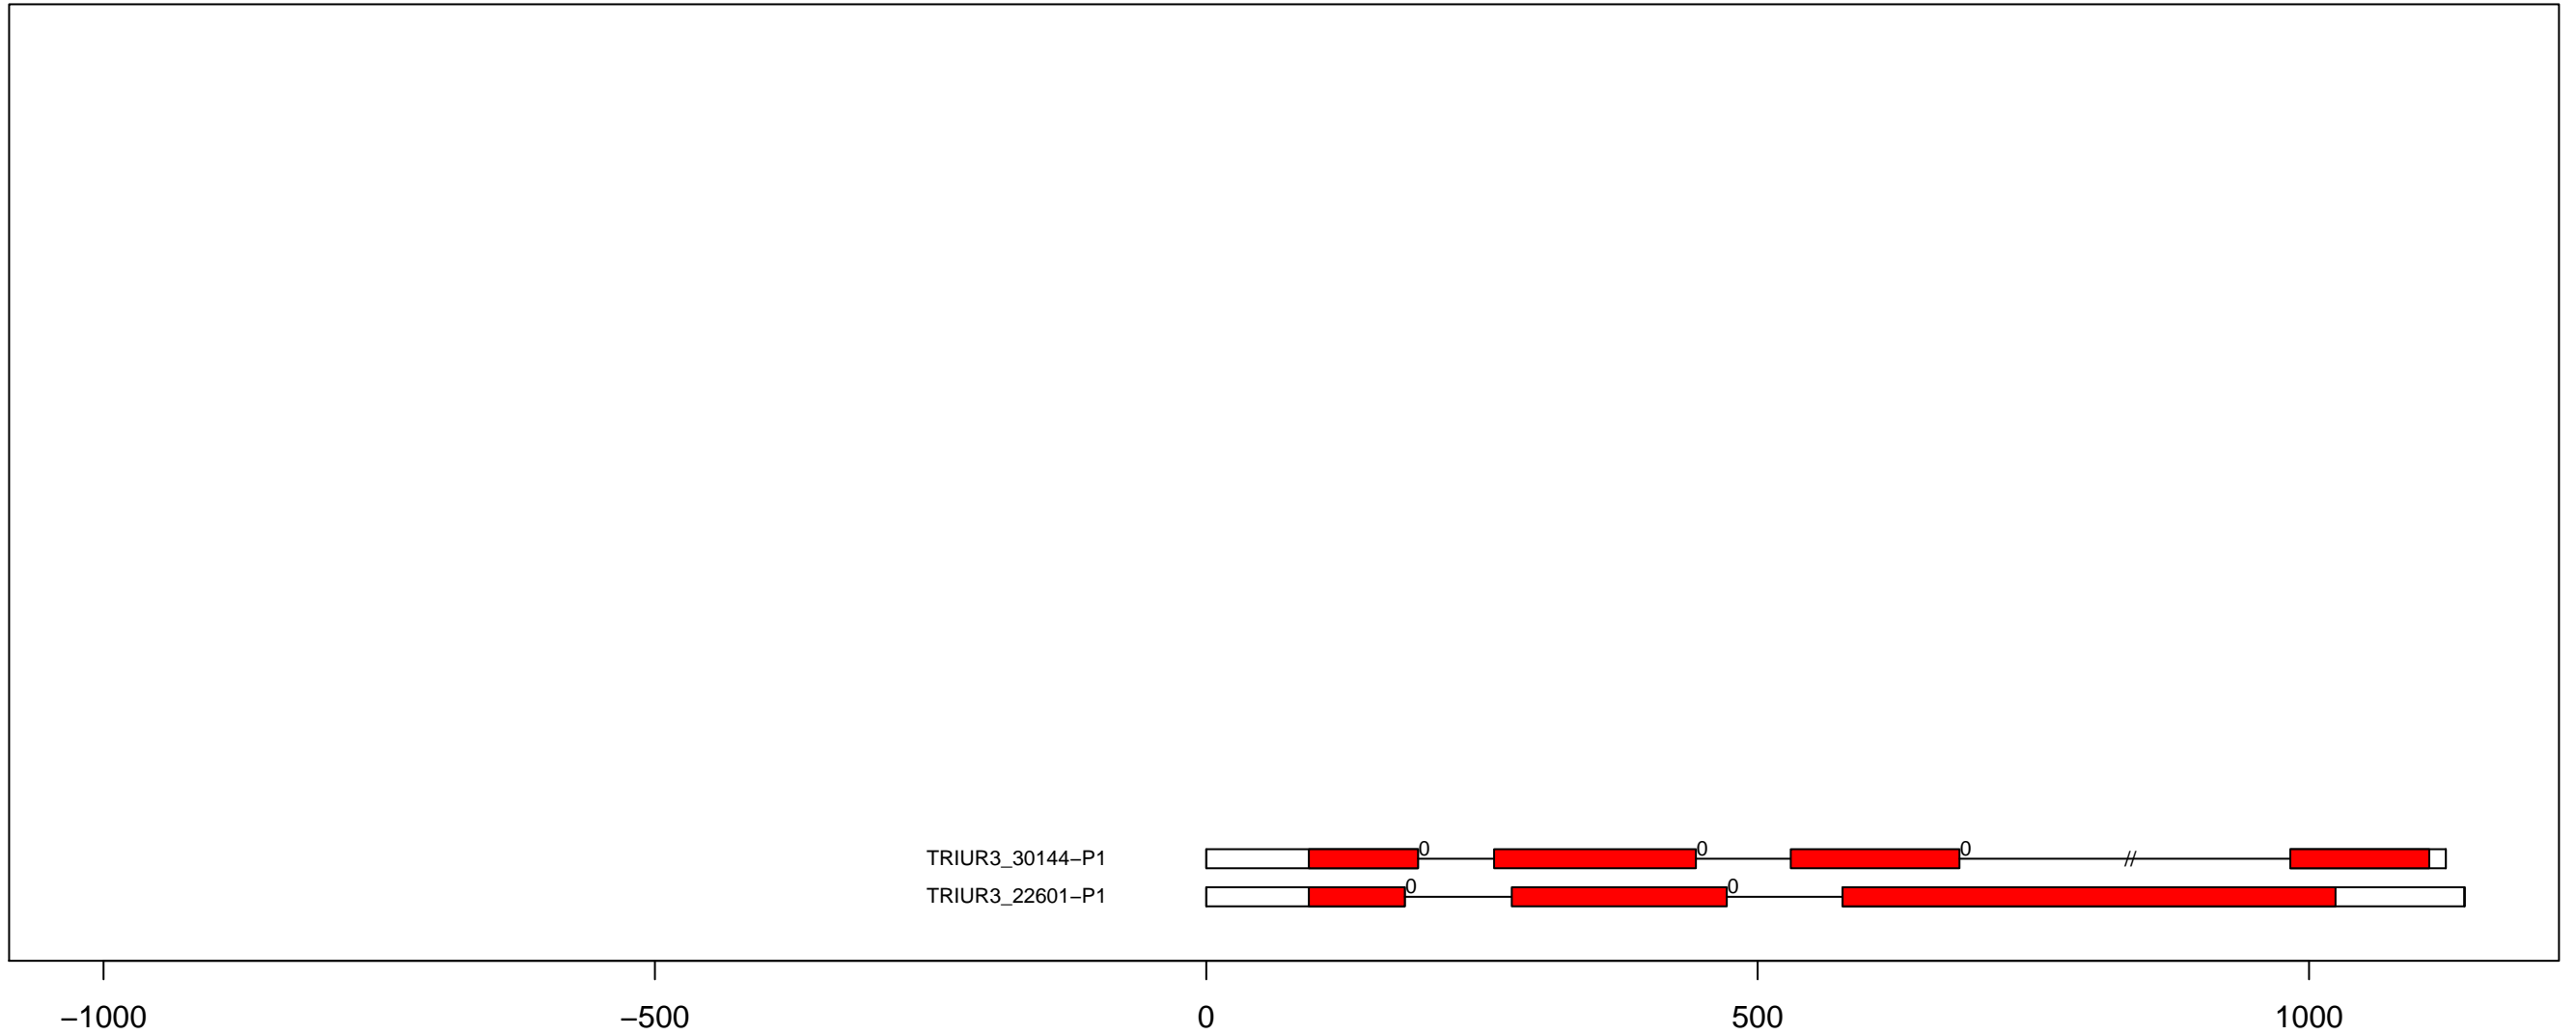



### T.ur class III peroxidase XVI subfamily exon-intron and prx domain diagram (all)

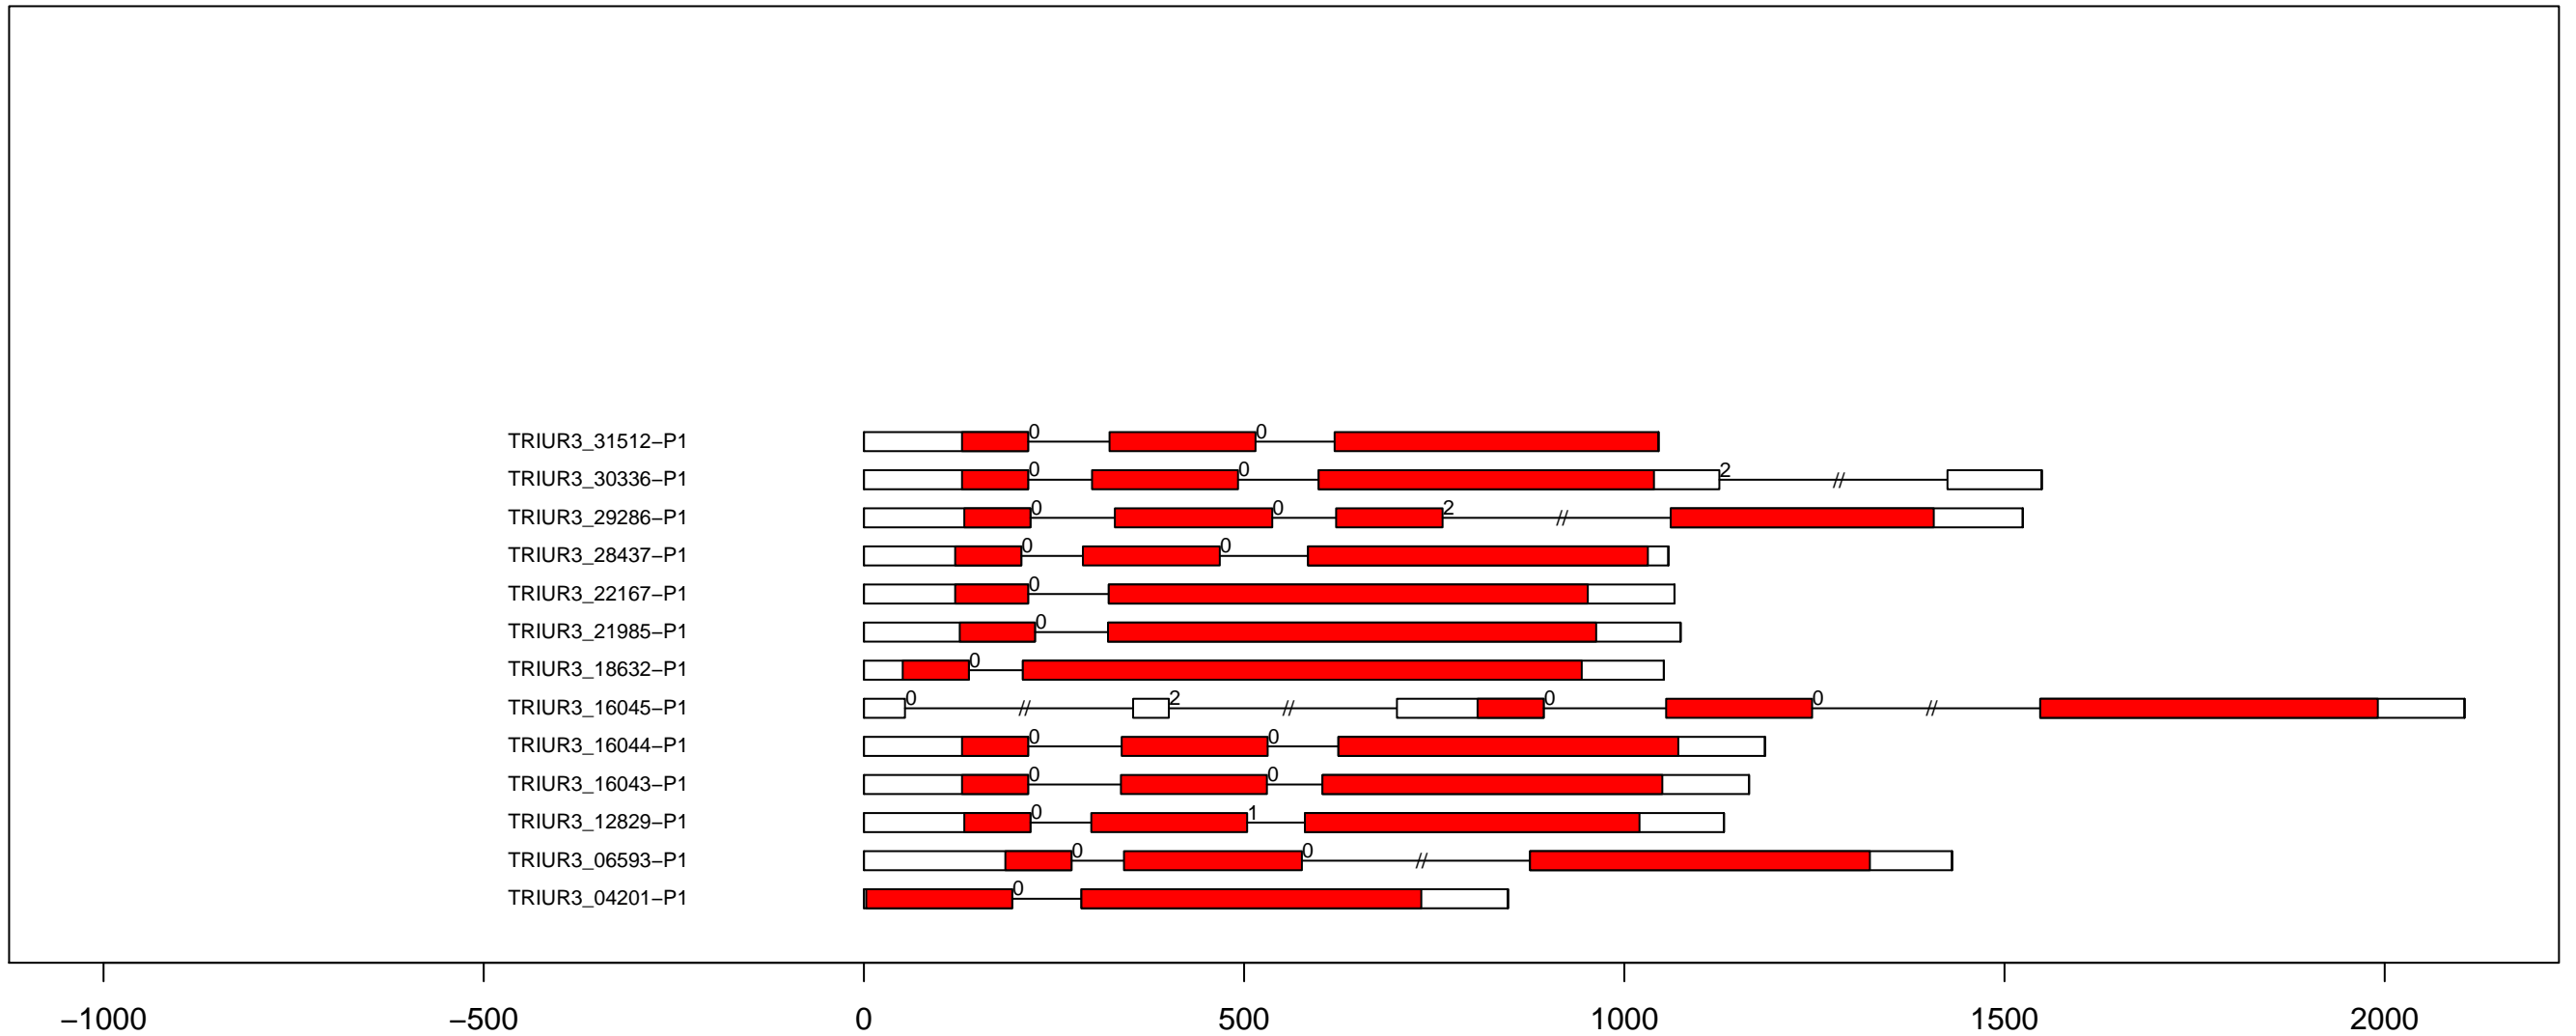

### T.ur class III peroxidase XVII subfamily exon-intron and prx domain diagram (all)

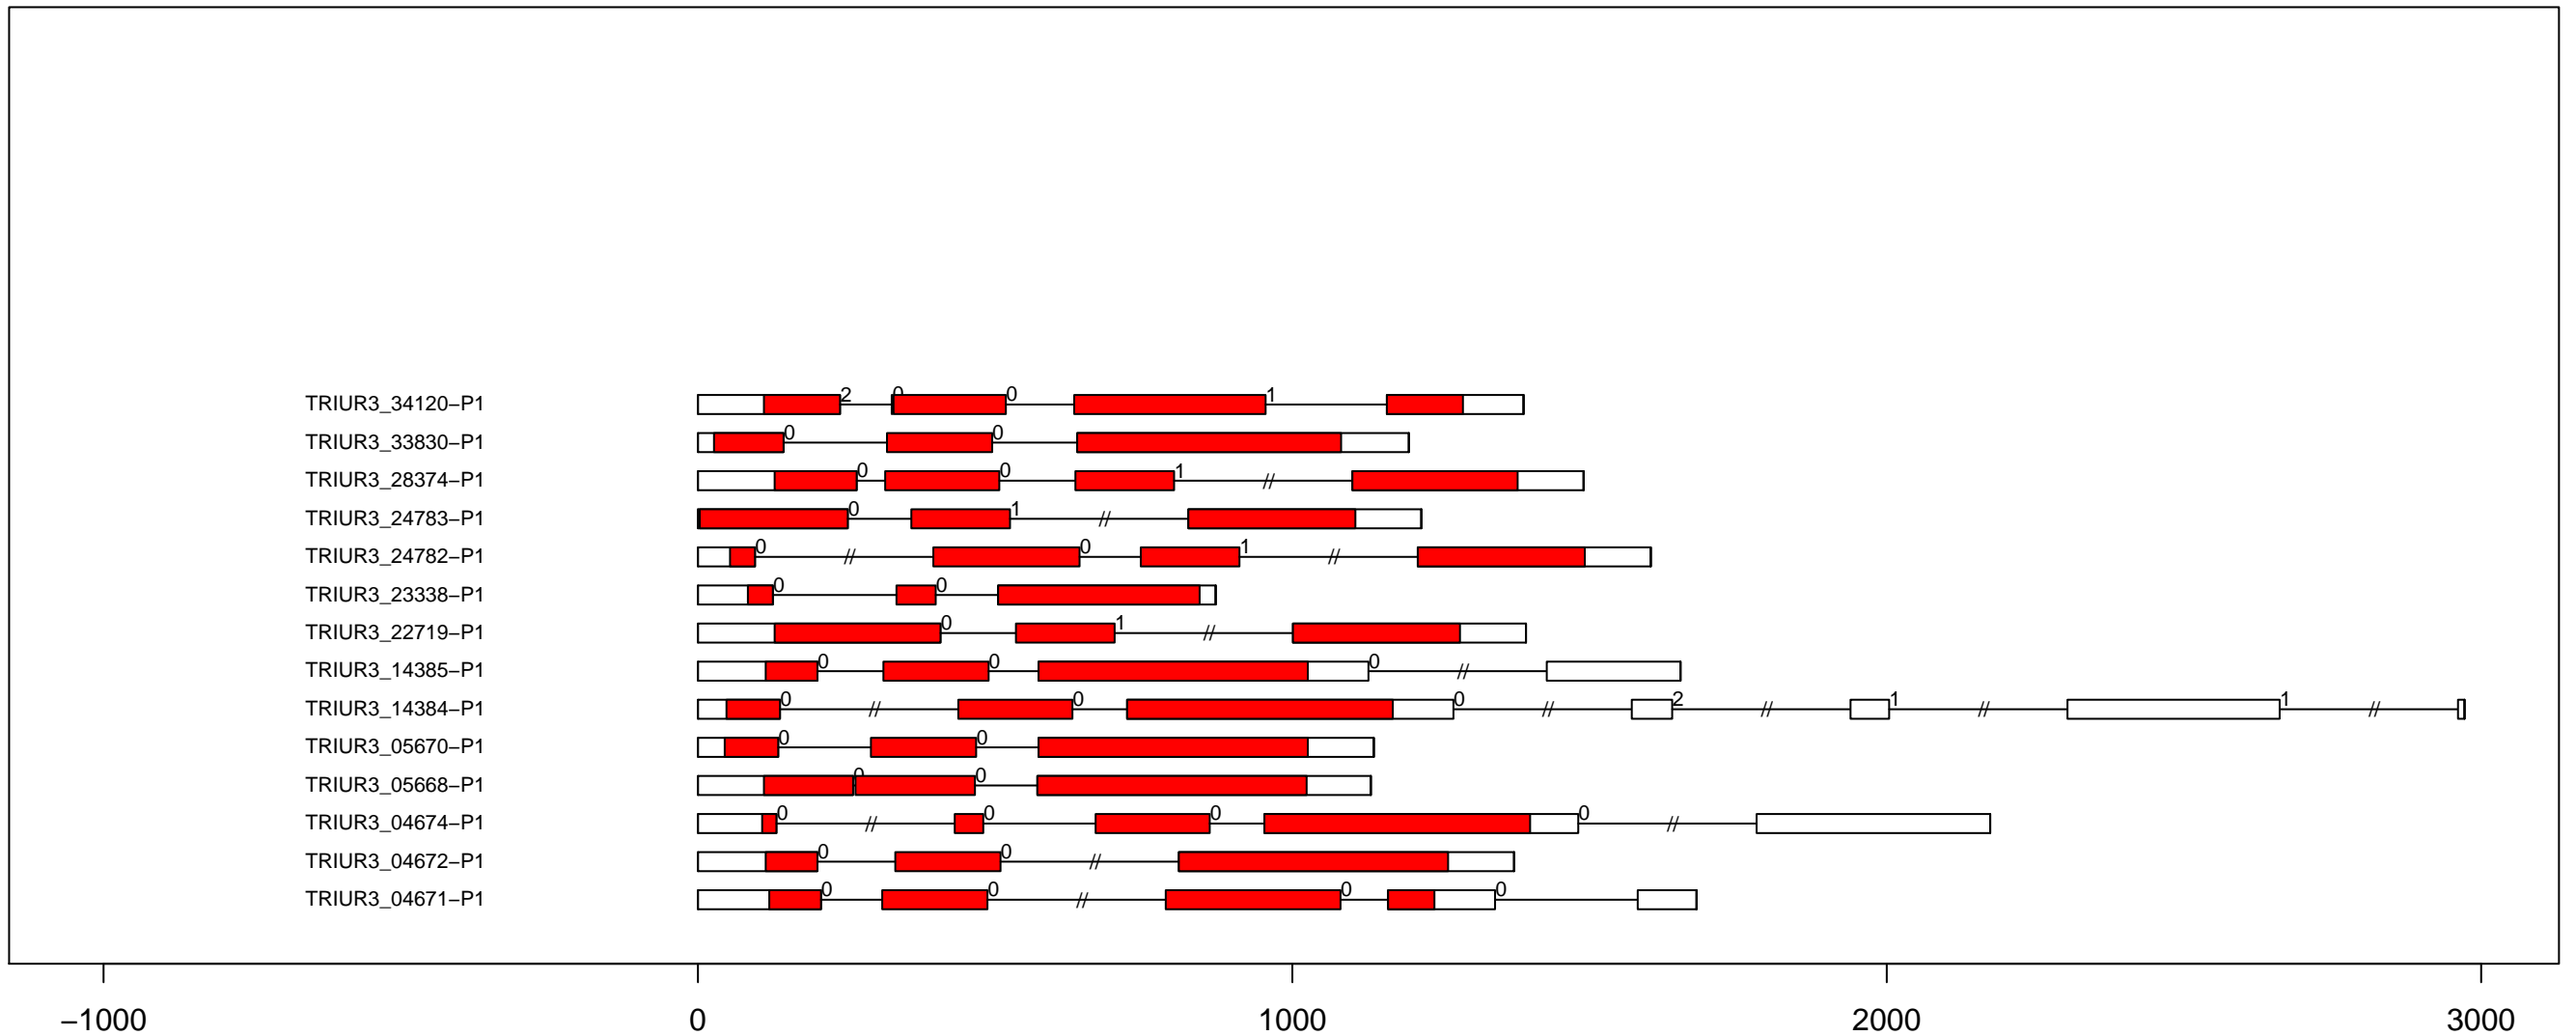

# T.ur class III peroxidase XVIII subfamily exon-intron and prx domain diagram (all)

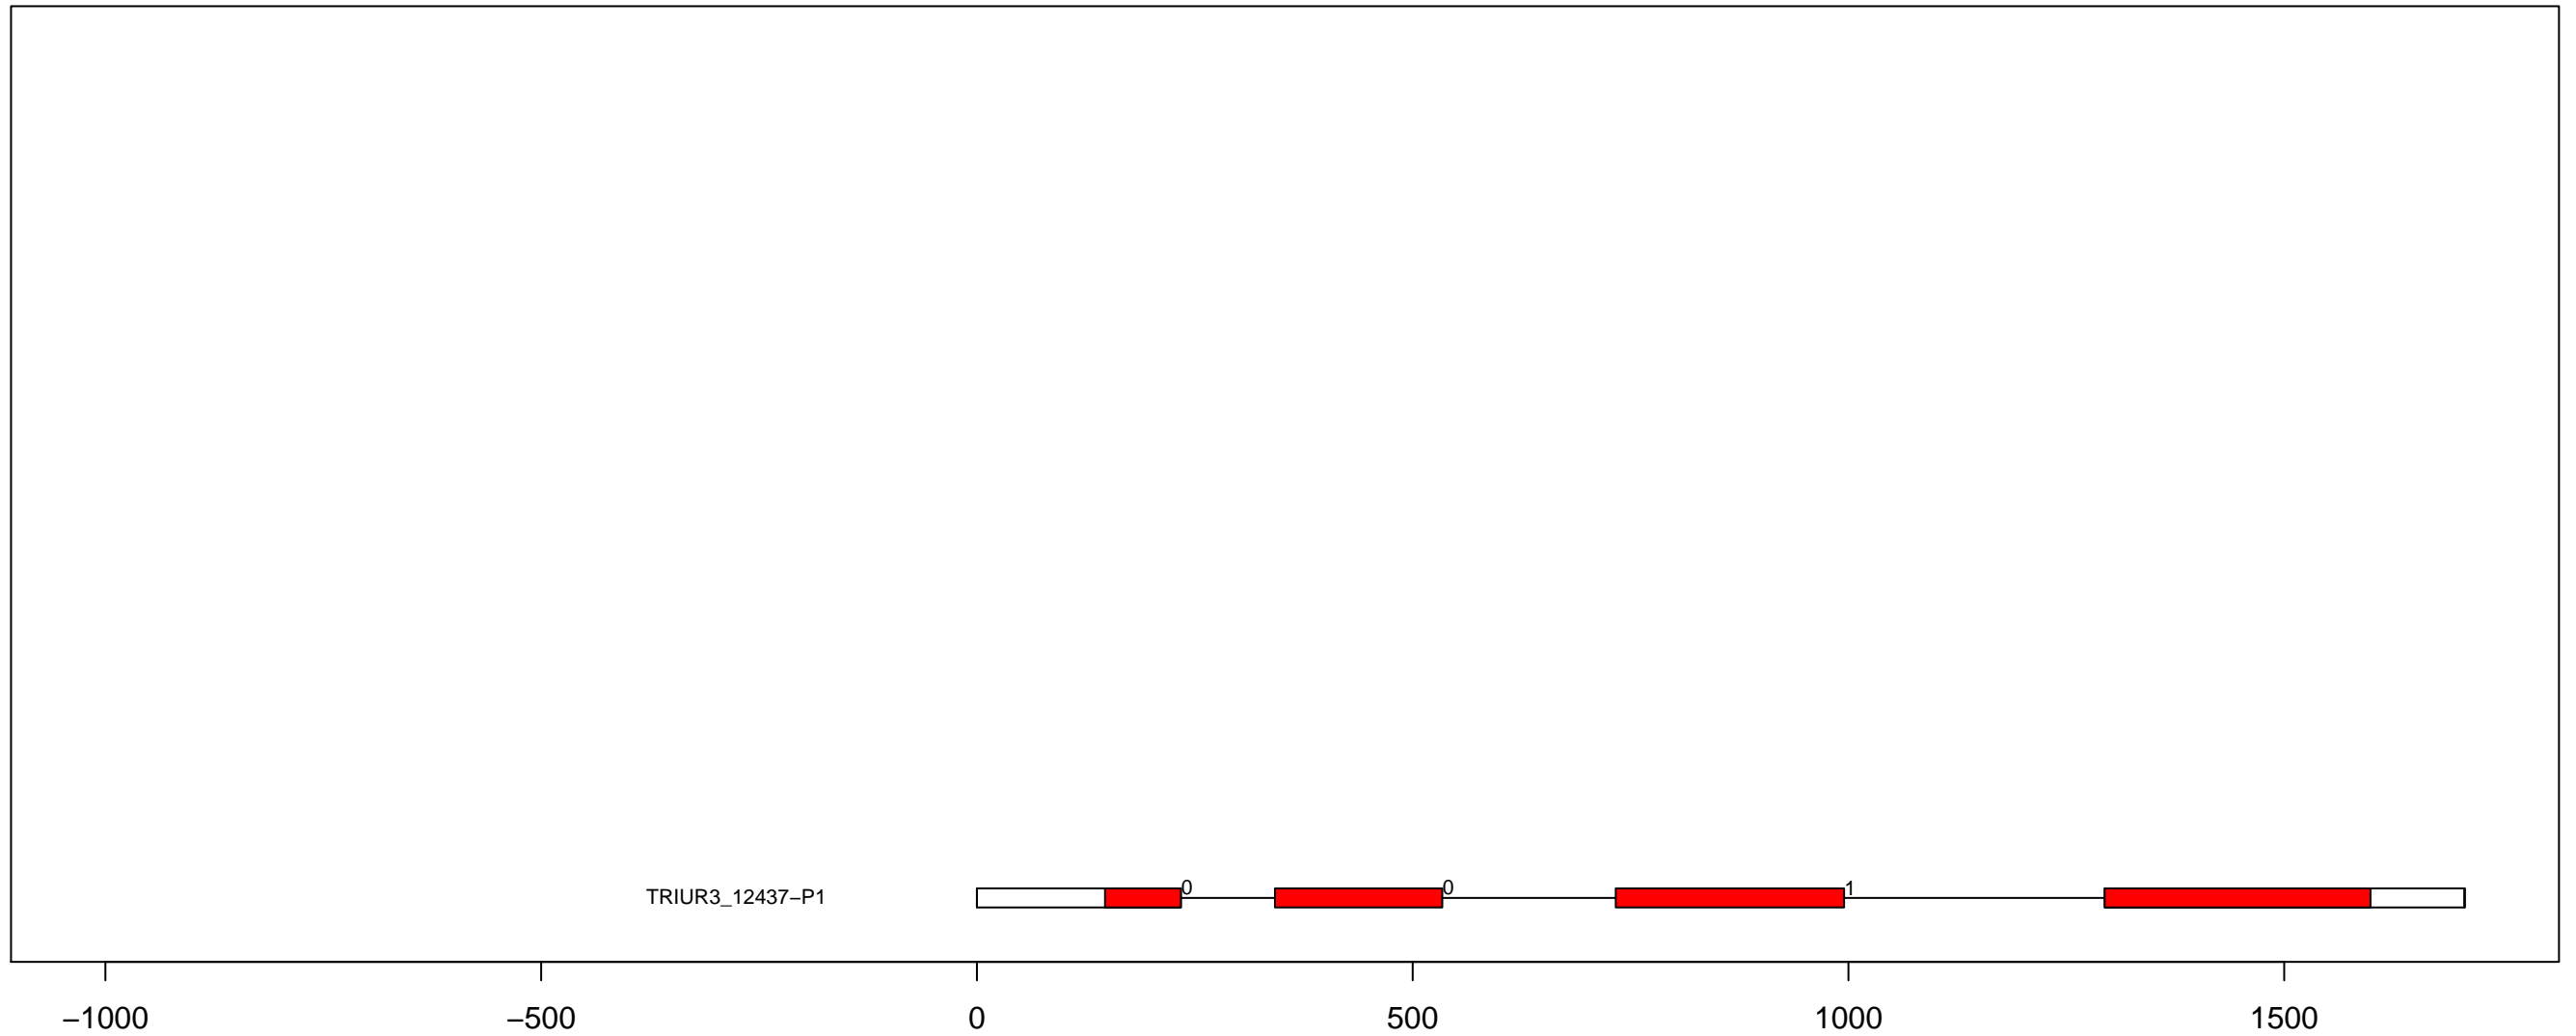

# T.ur class III peroxidase unclar\_classification subfamily exon-intron and prx domain diagram (all)

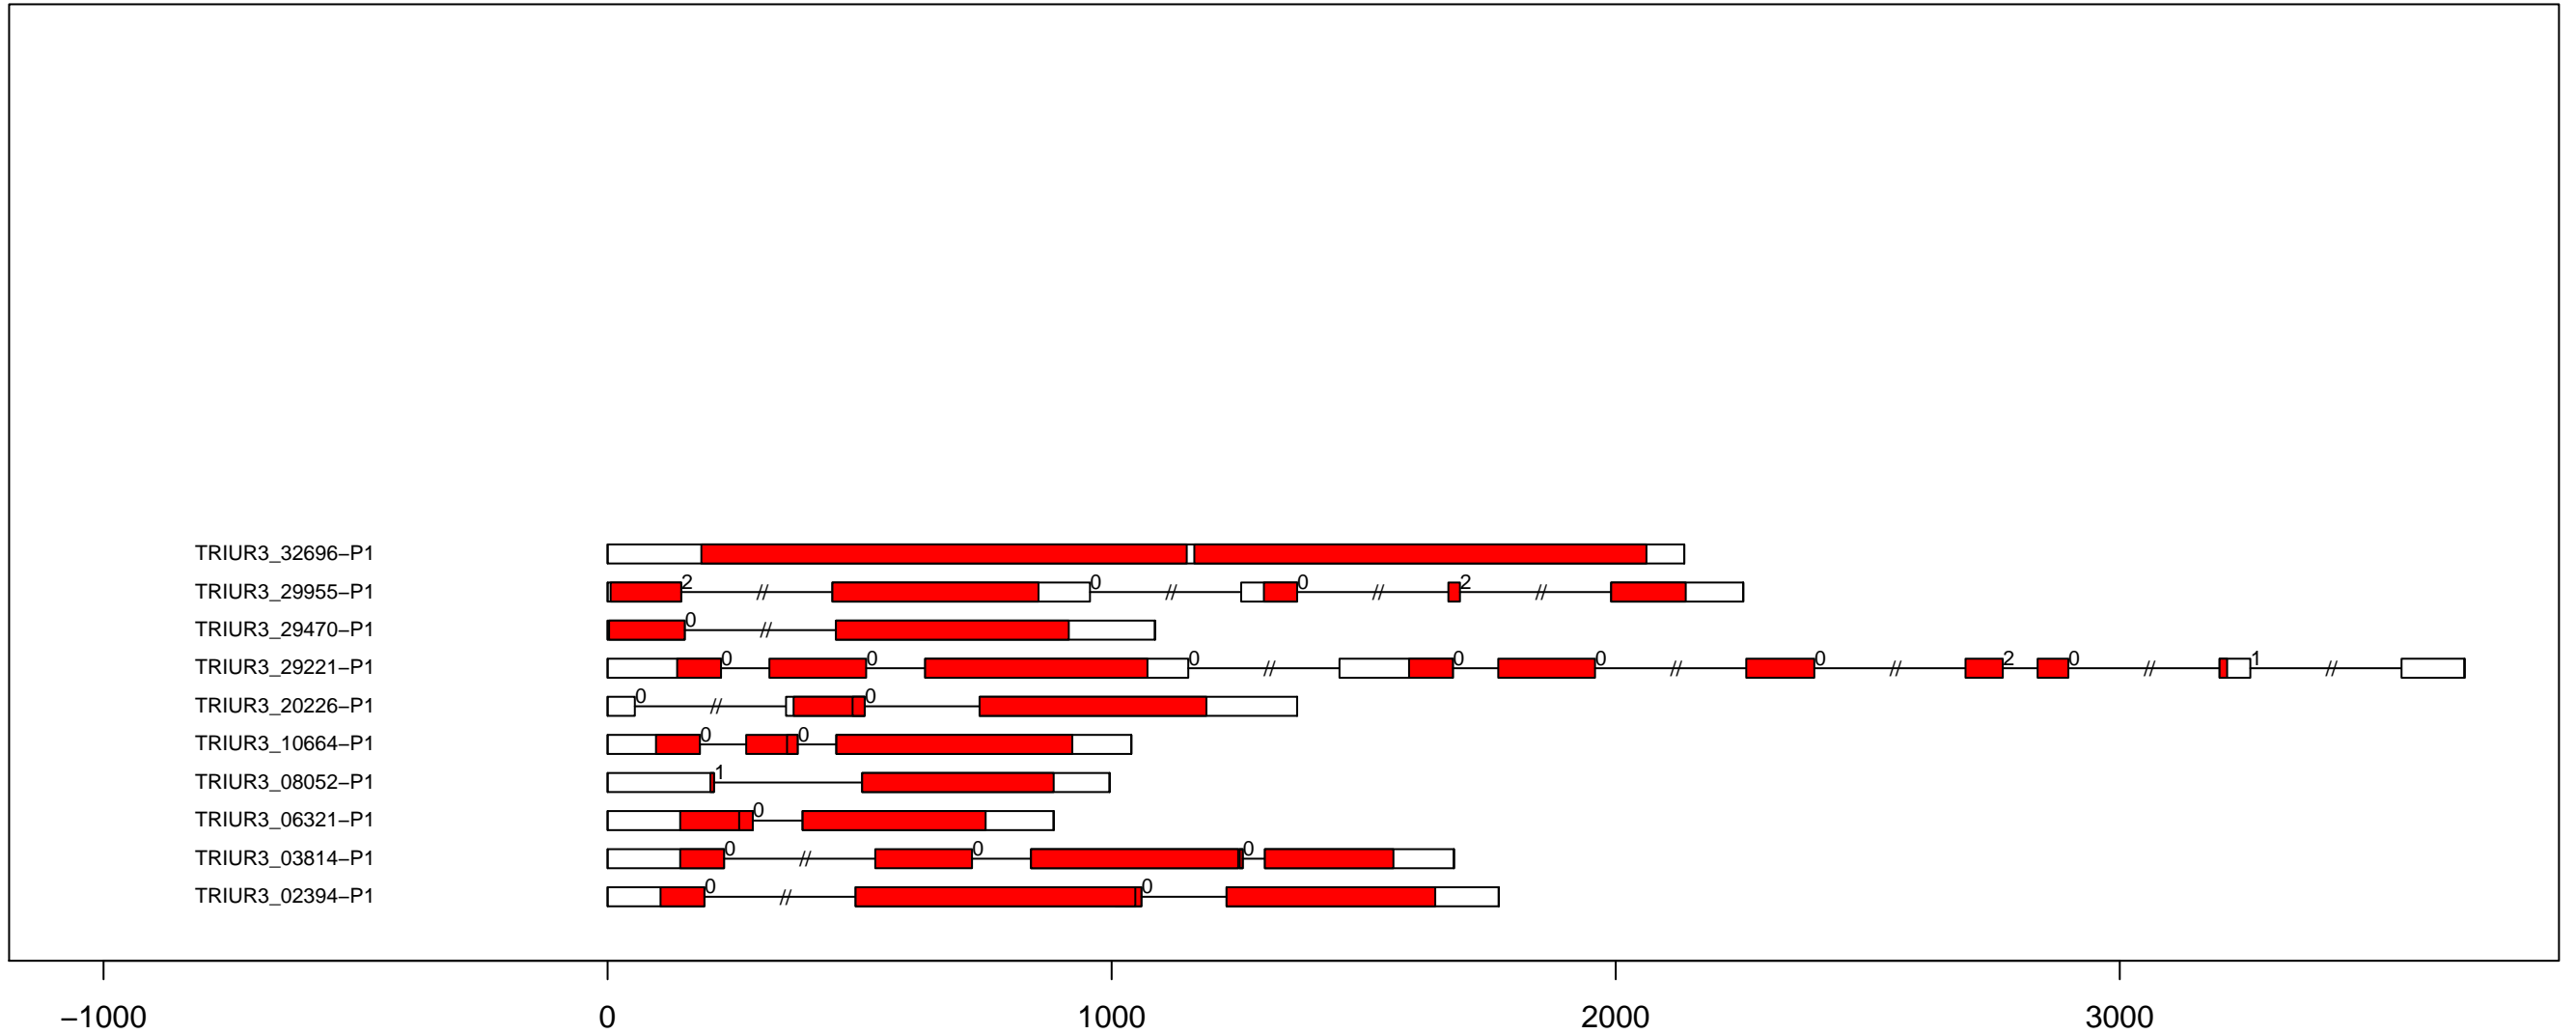

### A.ta class III peroxidase I subfamily exon-intron and prx domain diagram (part 1)

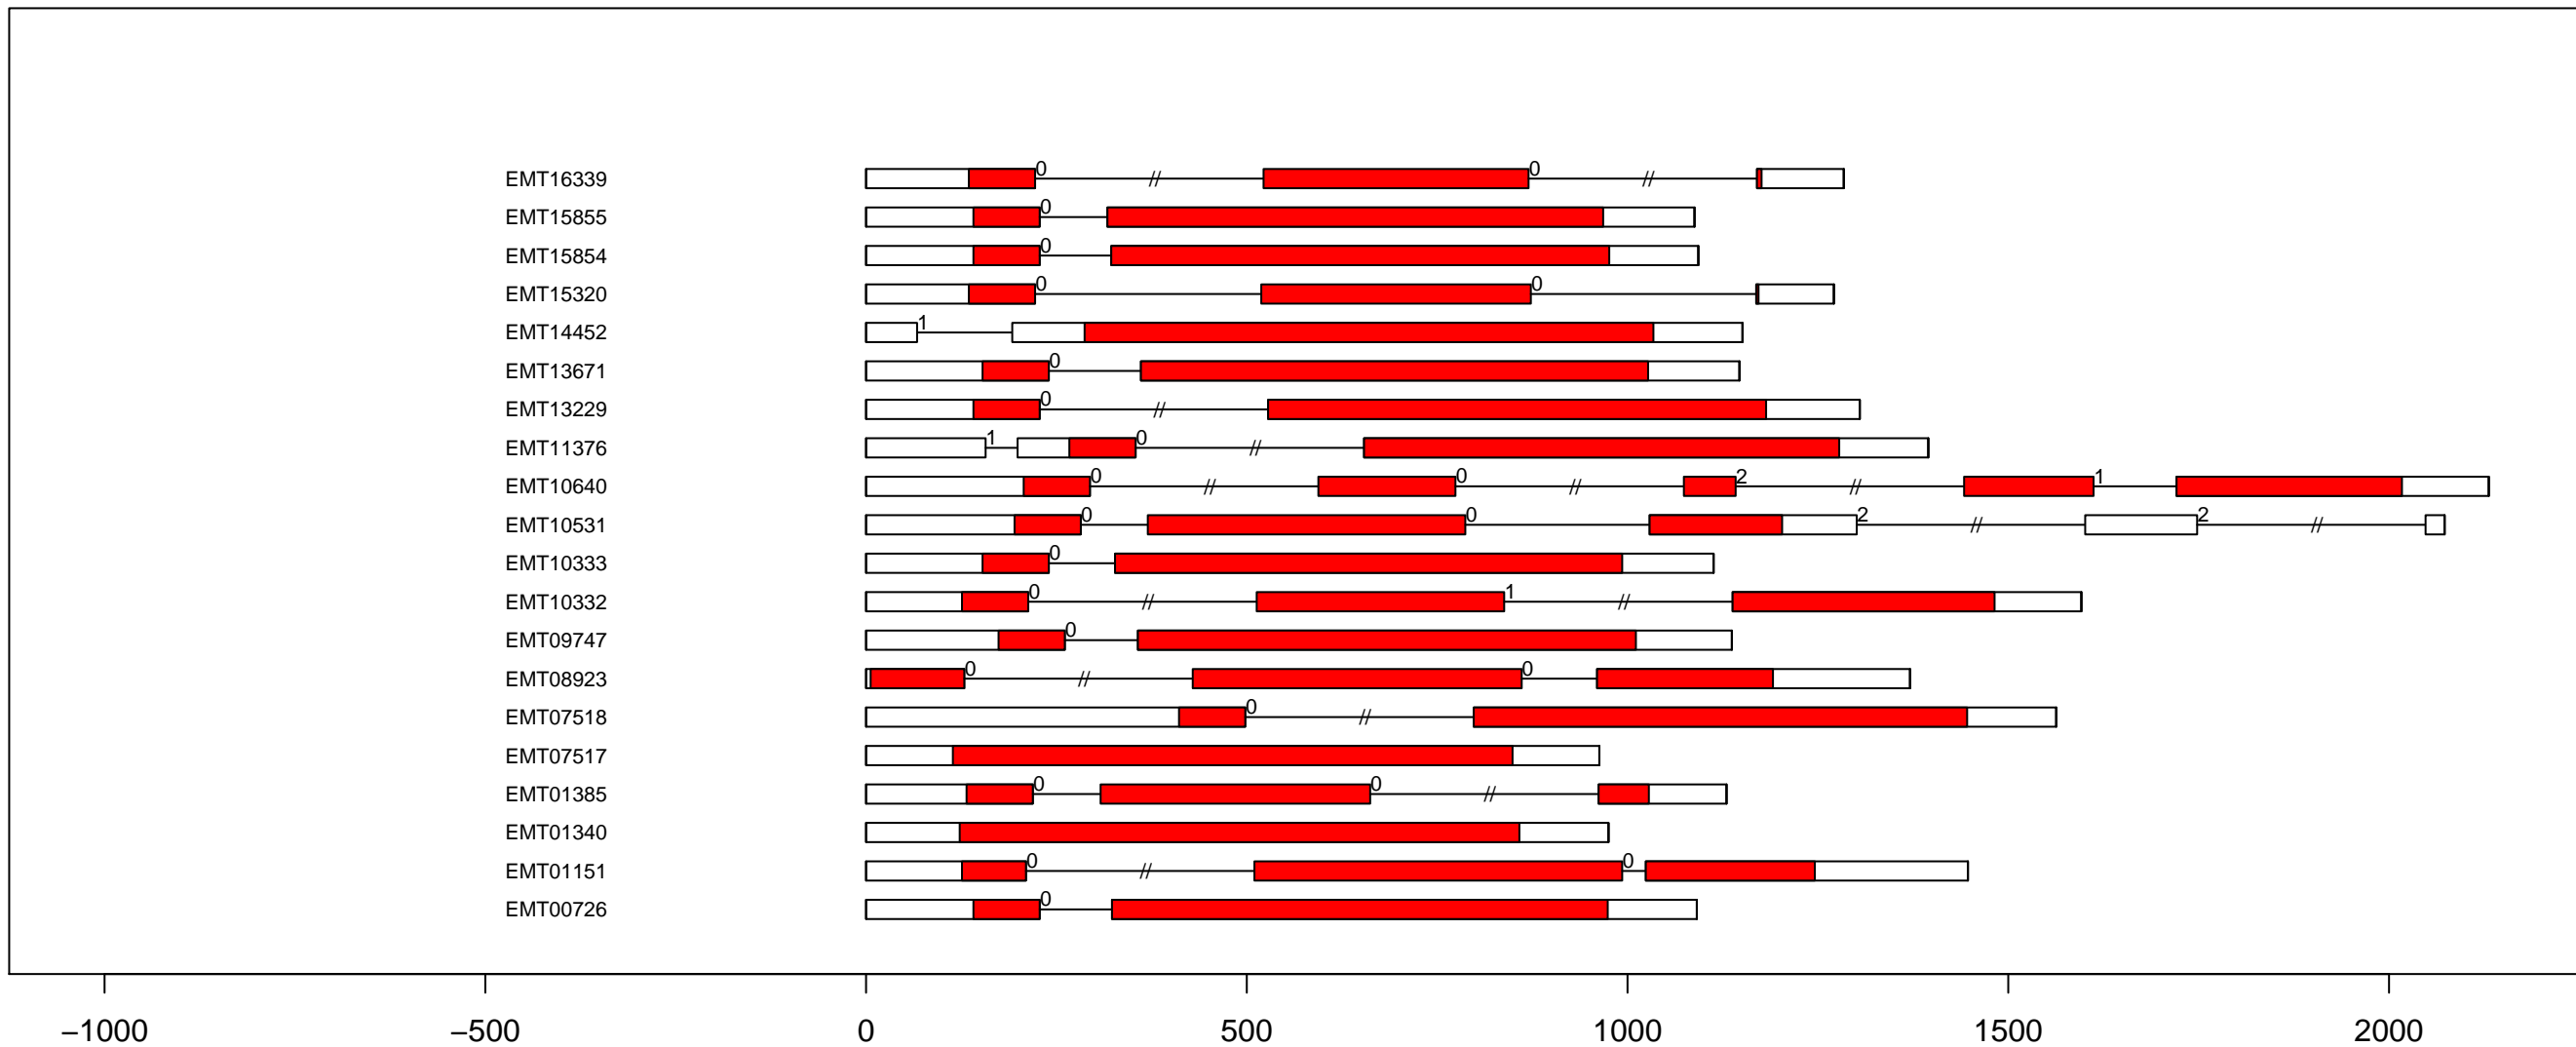

### A.ta class III peroxidase I subfamily exon-intron and prx domain diagram (part 2)

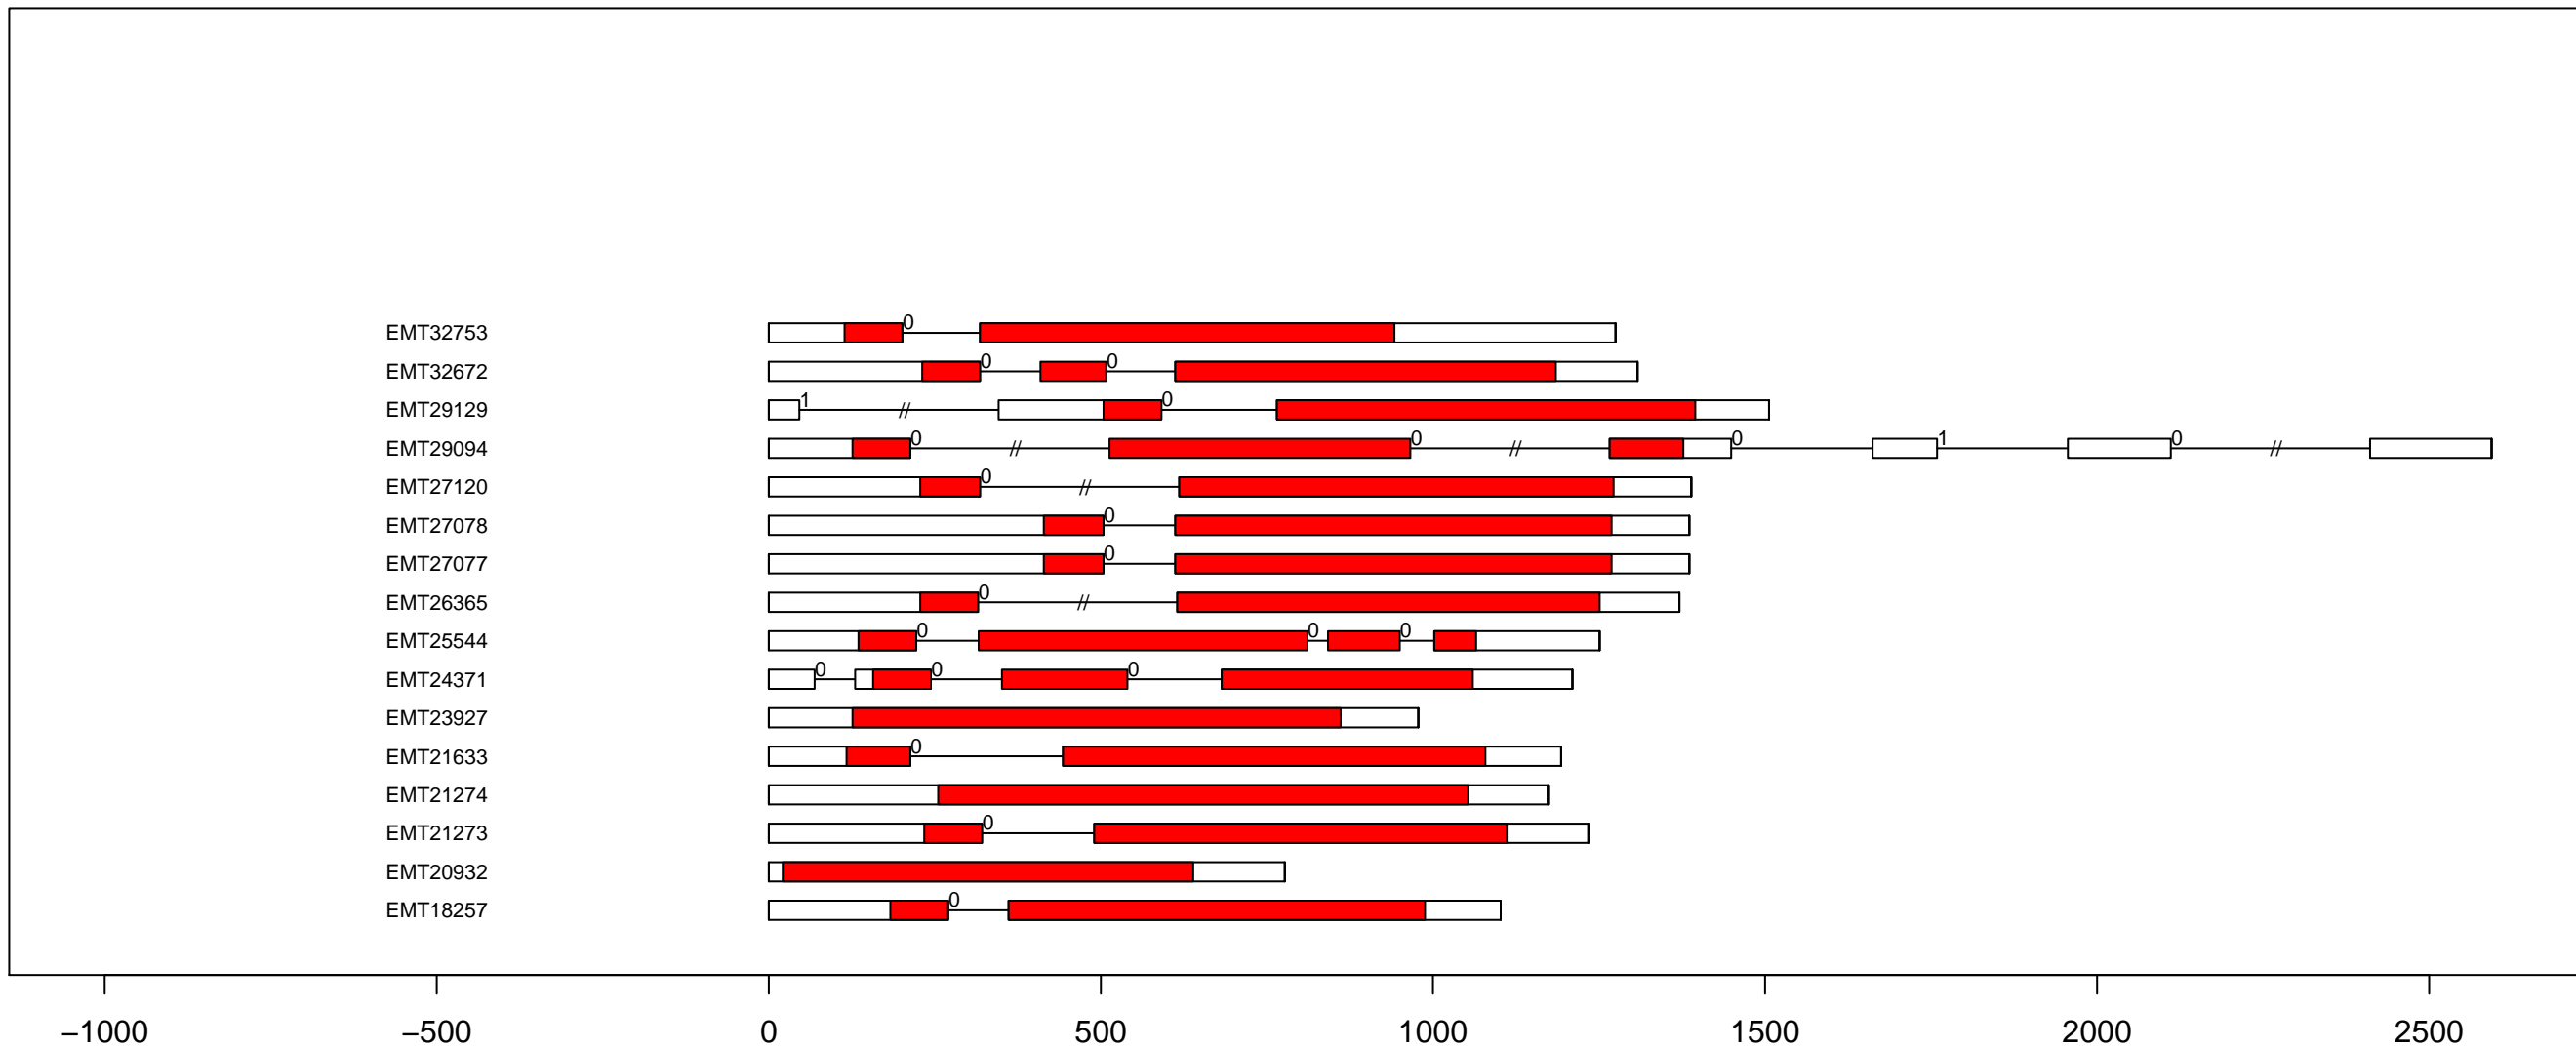

# A.ta class III peroxidase II subfamily exon-intron and prx domain diagram (all)

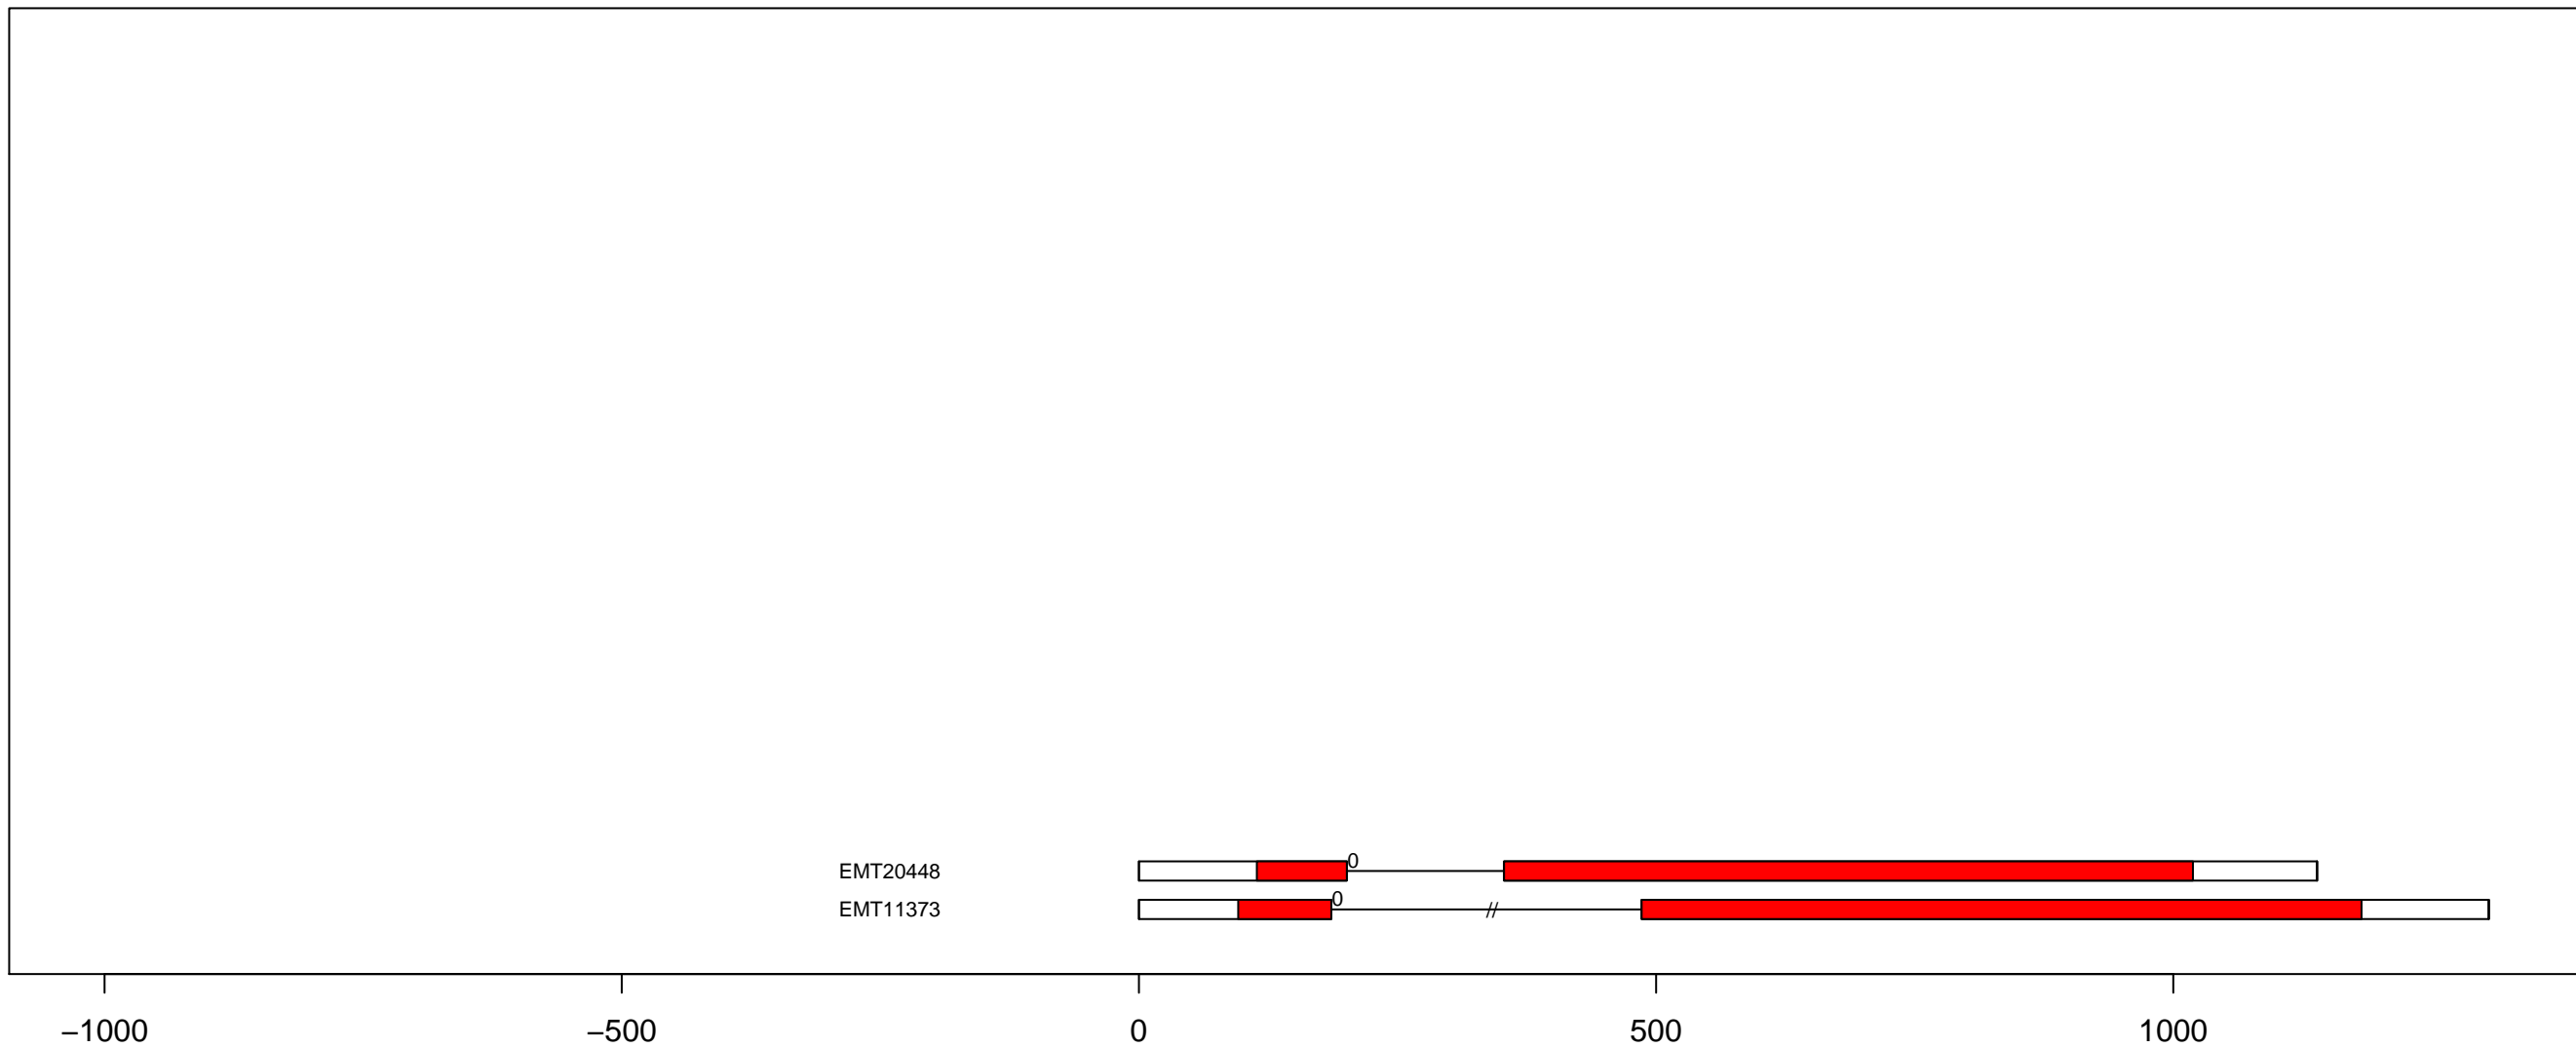

### A.ta class III peroxidase V subfamily exon-intron and prx domain diagram (part 1)

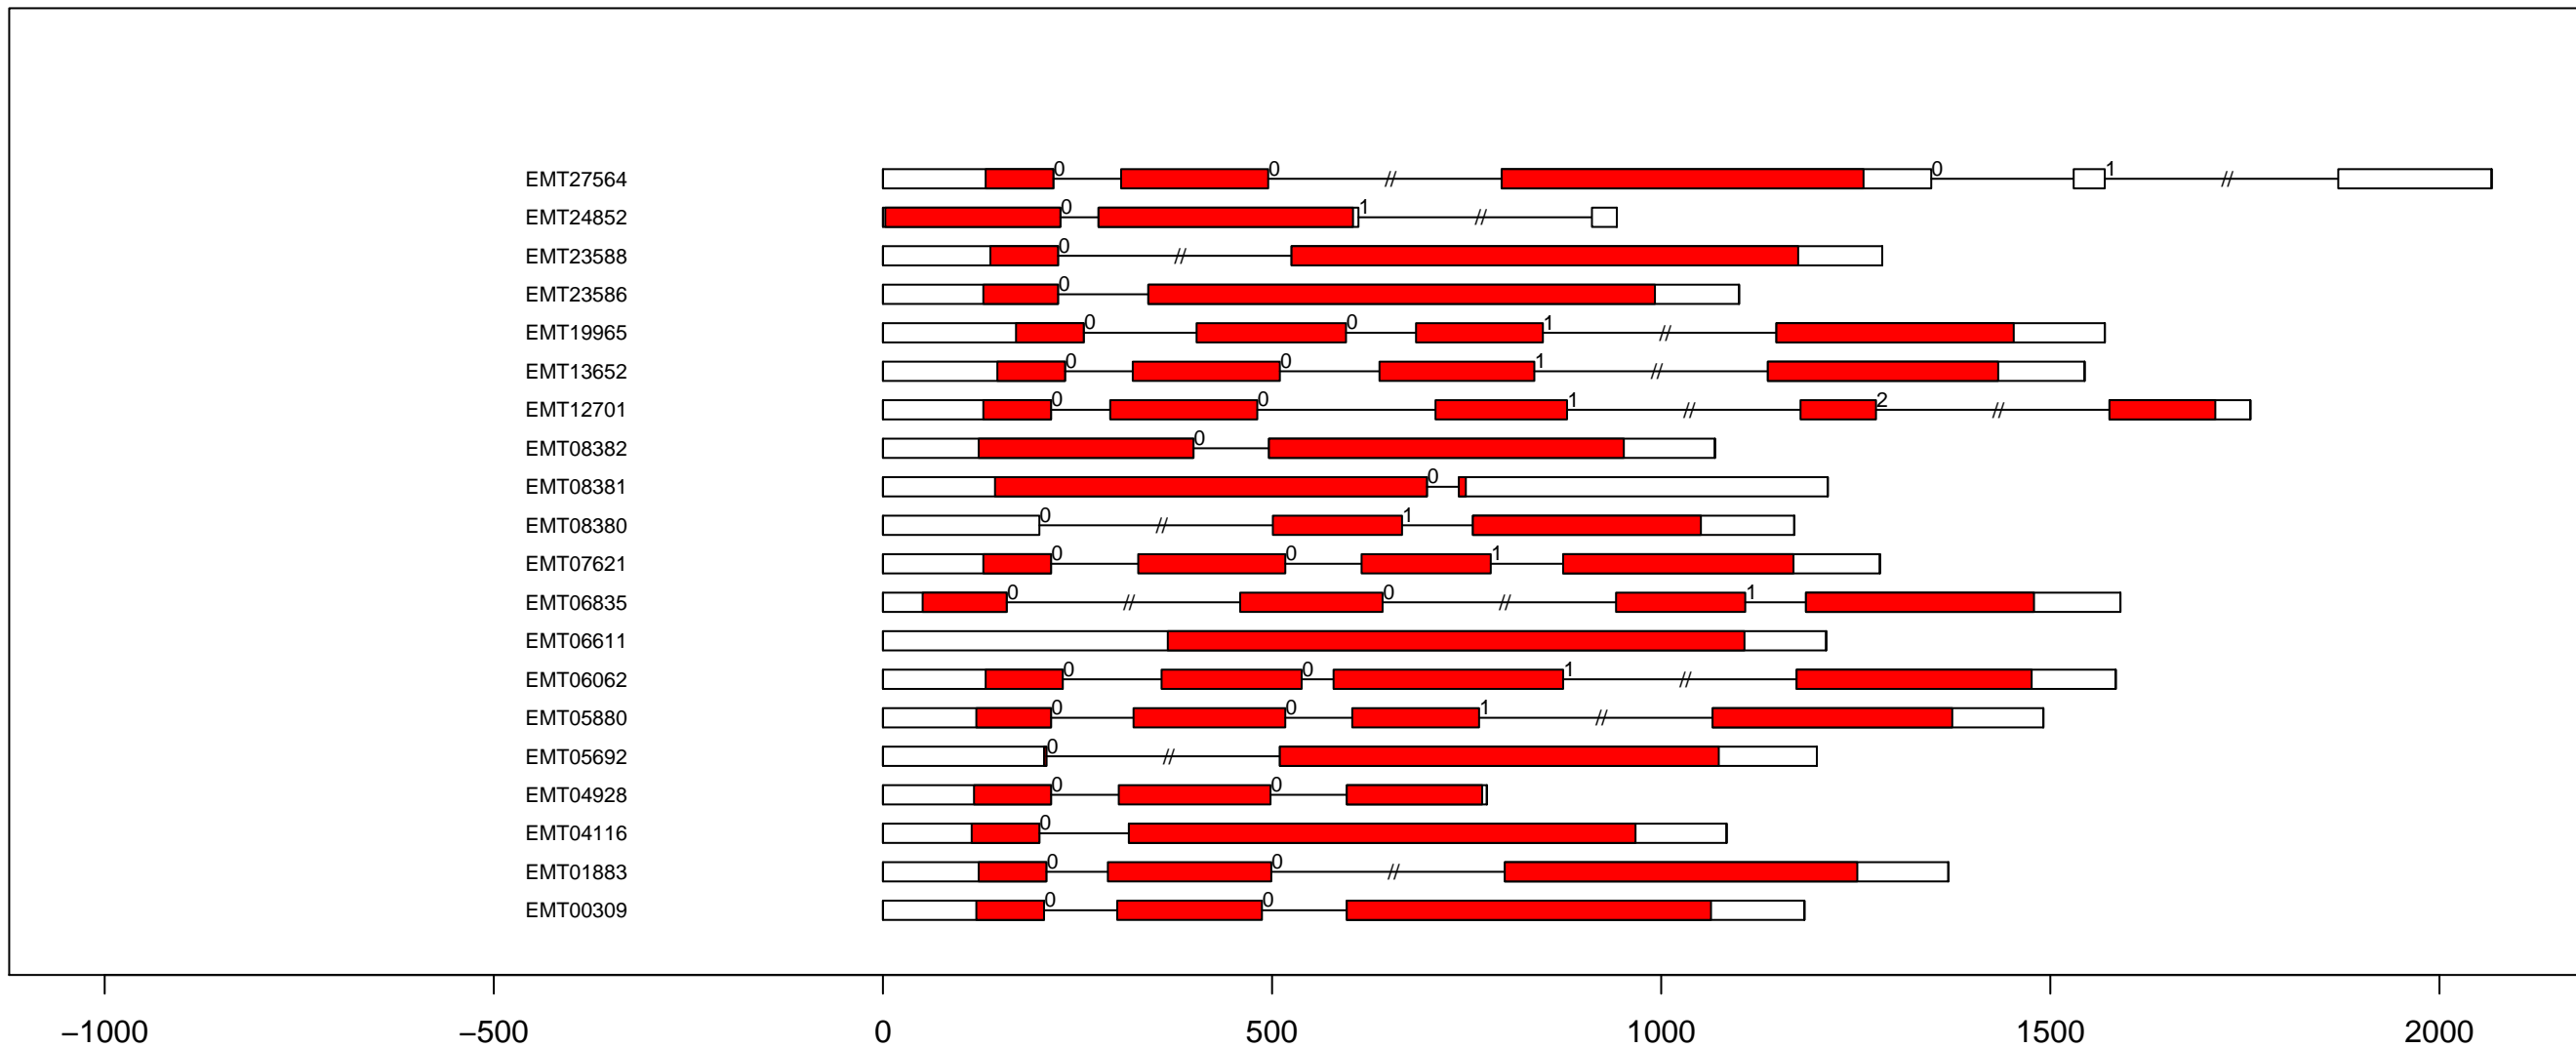



# A.ta class III peroxidase V subfamily exon-intron and prx domain diagram (part 2)

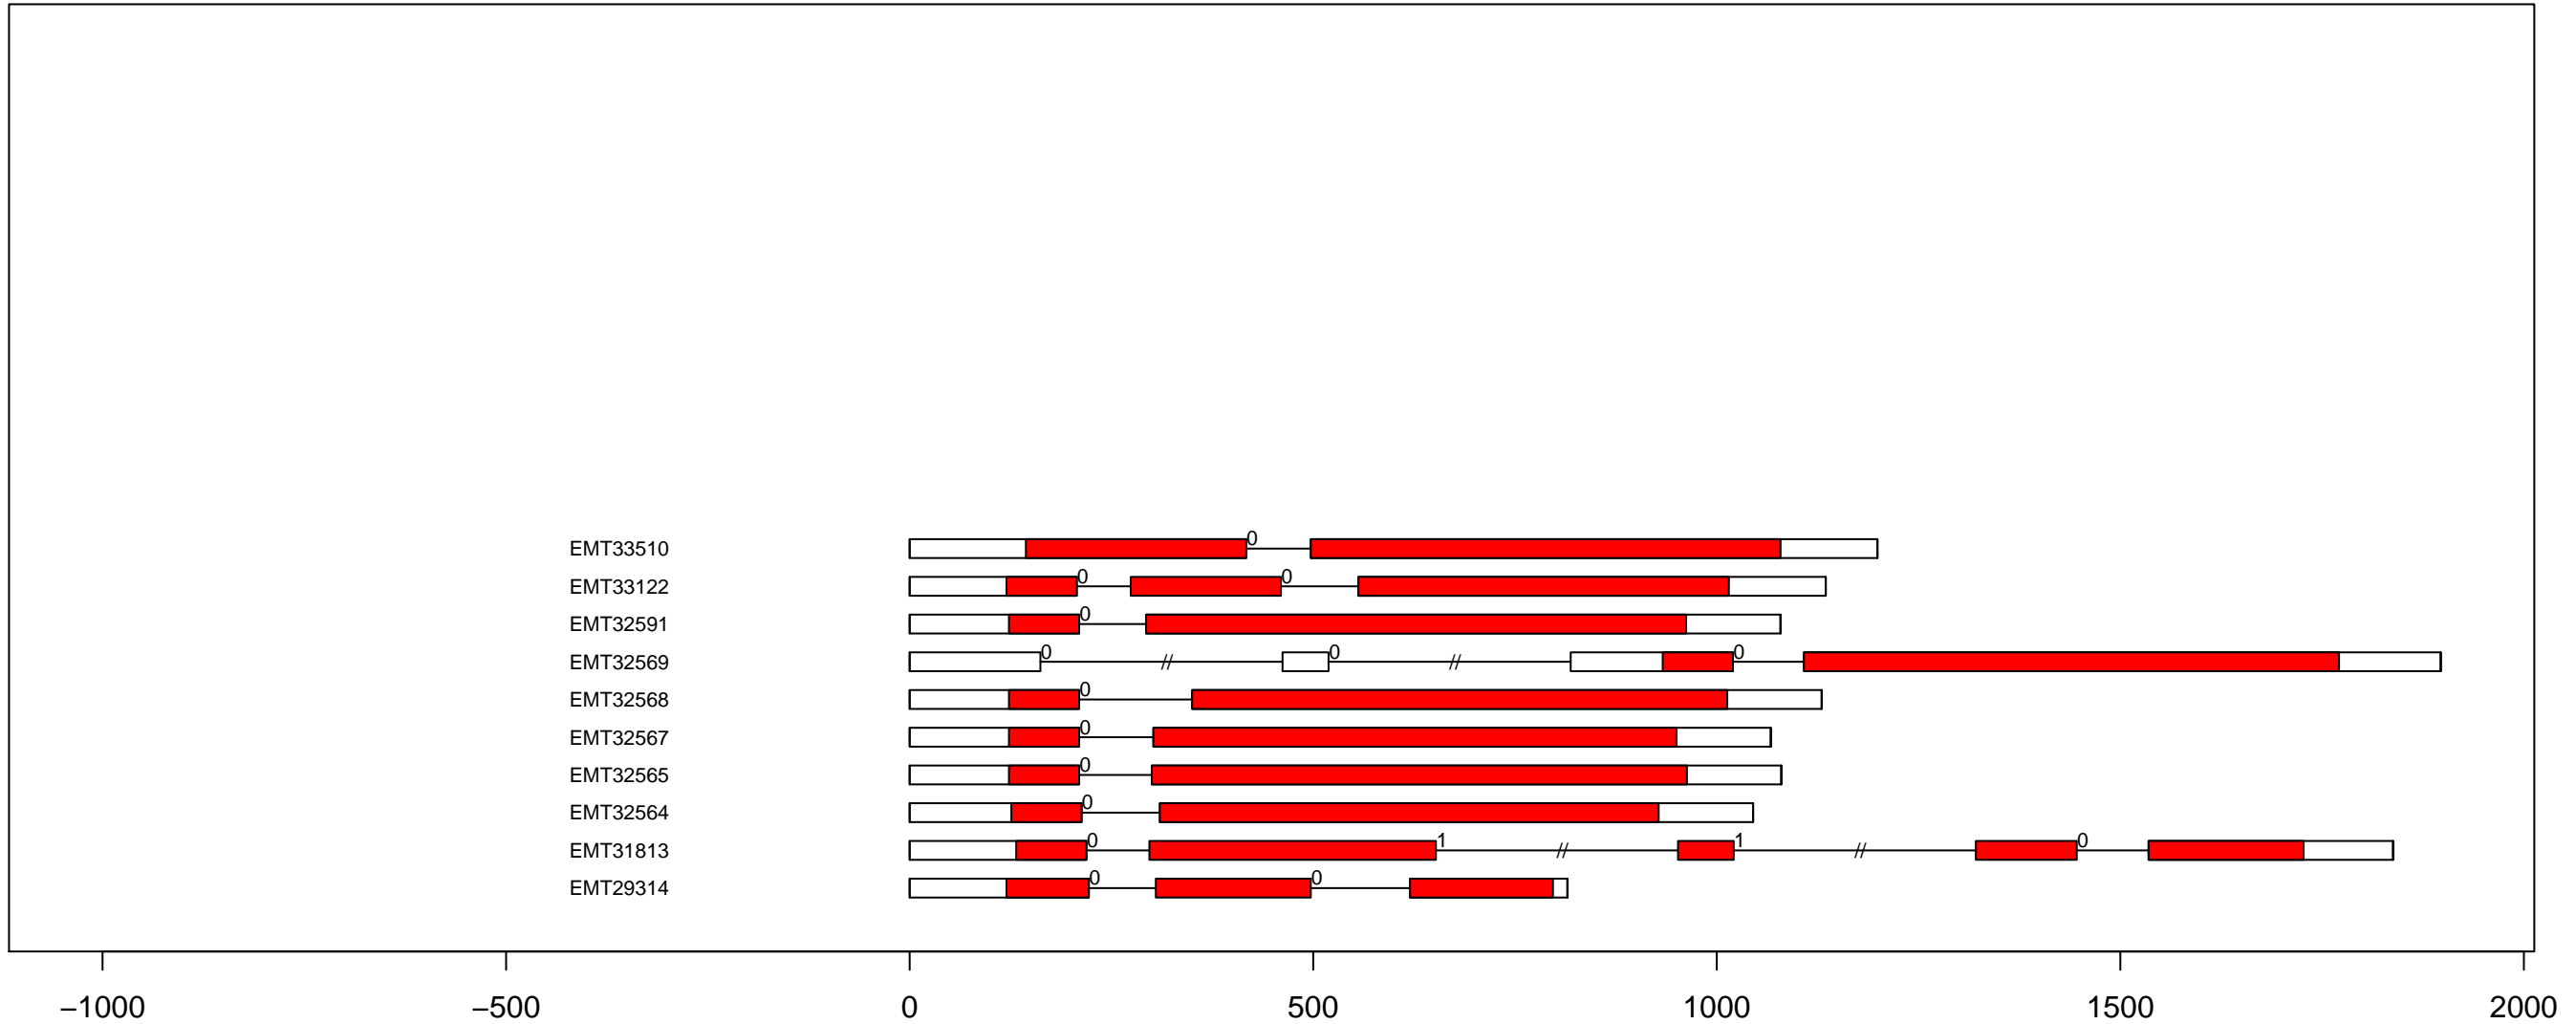

### A.ta class III peroxidase VI subfamily exon-intron and prx domain diagram (all)

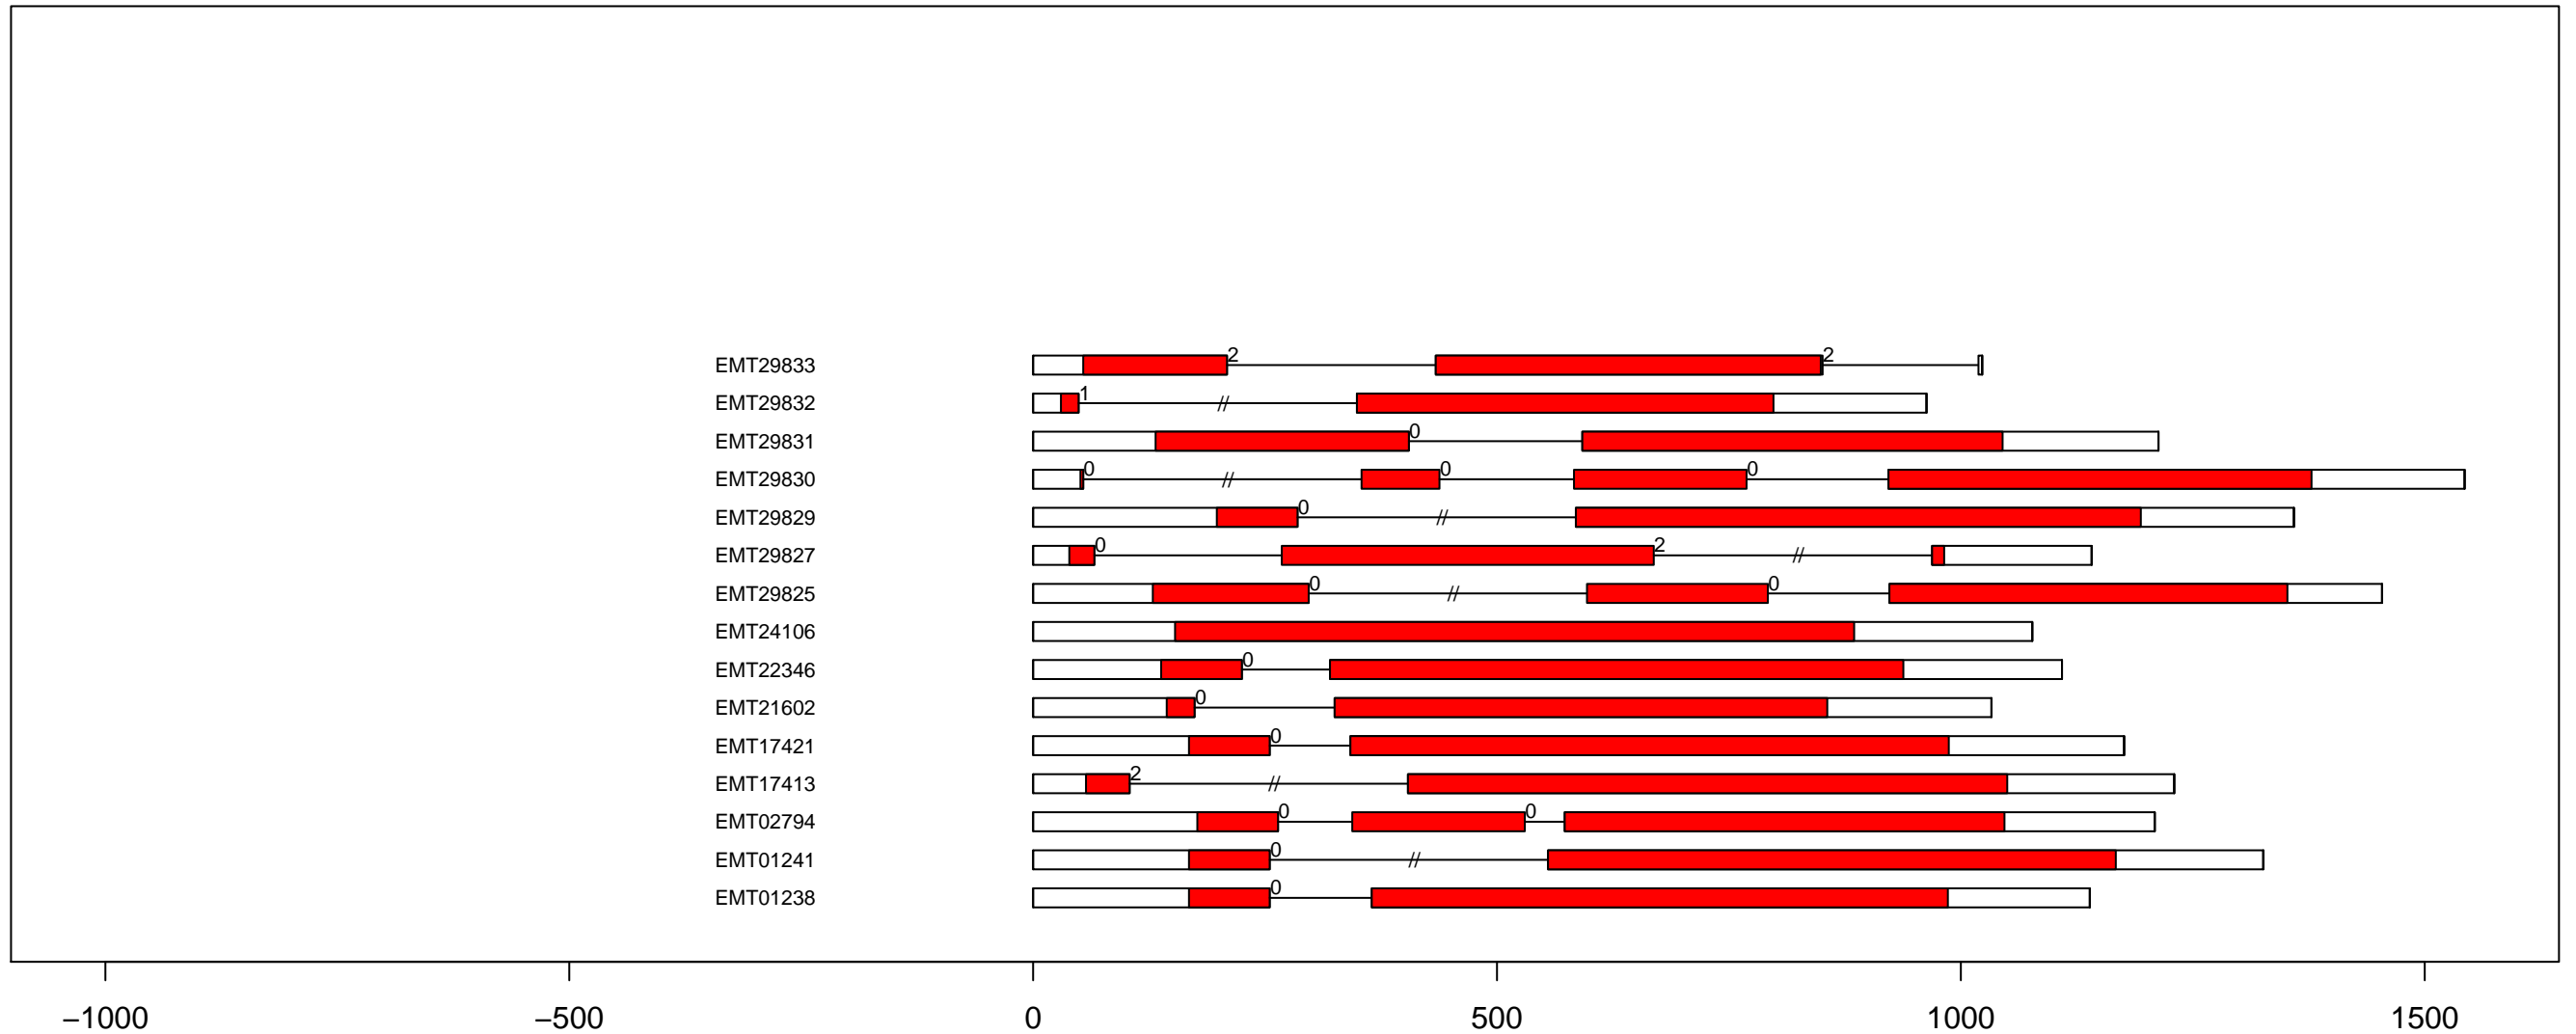

### A.ta class III peroxidase VII subfamily exon-intron and prx domain diagram (all)

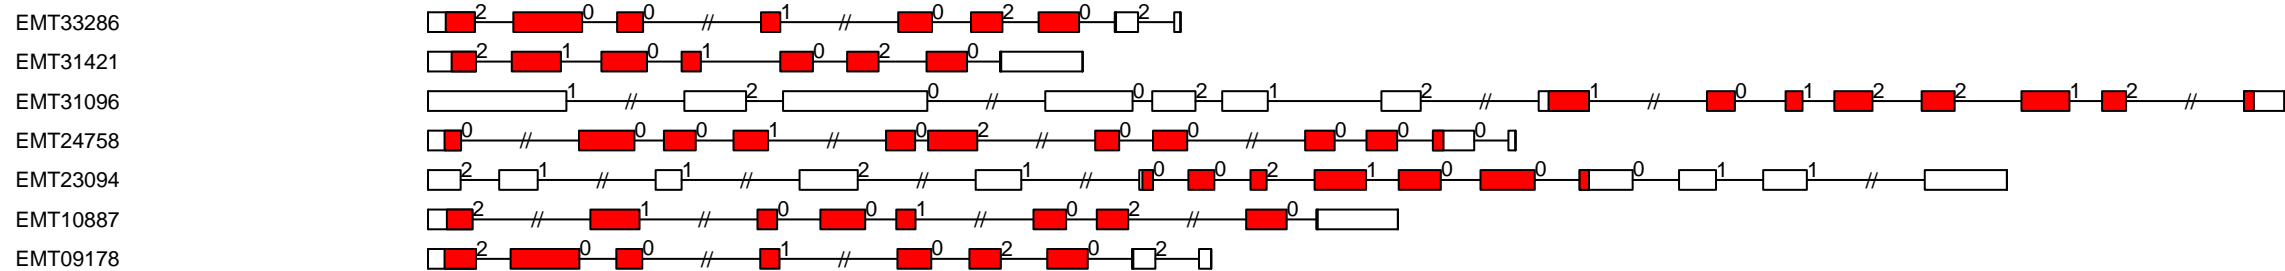

-1000

0

1000

2000

3000

4000

# A.ta class III peroxidase IX subfamily exon-intron and prx domain diagram (all)

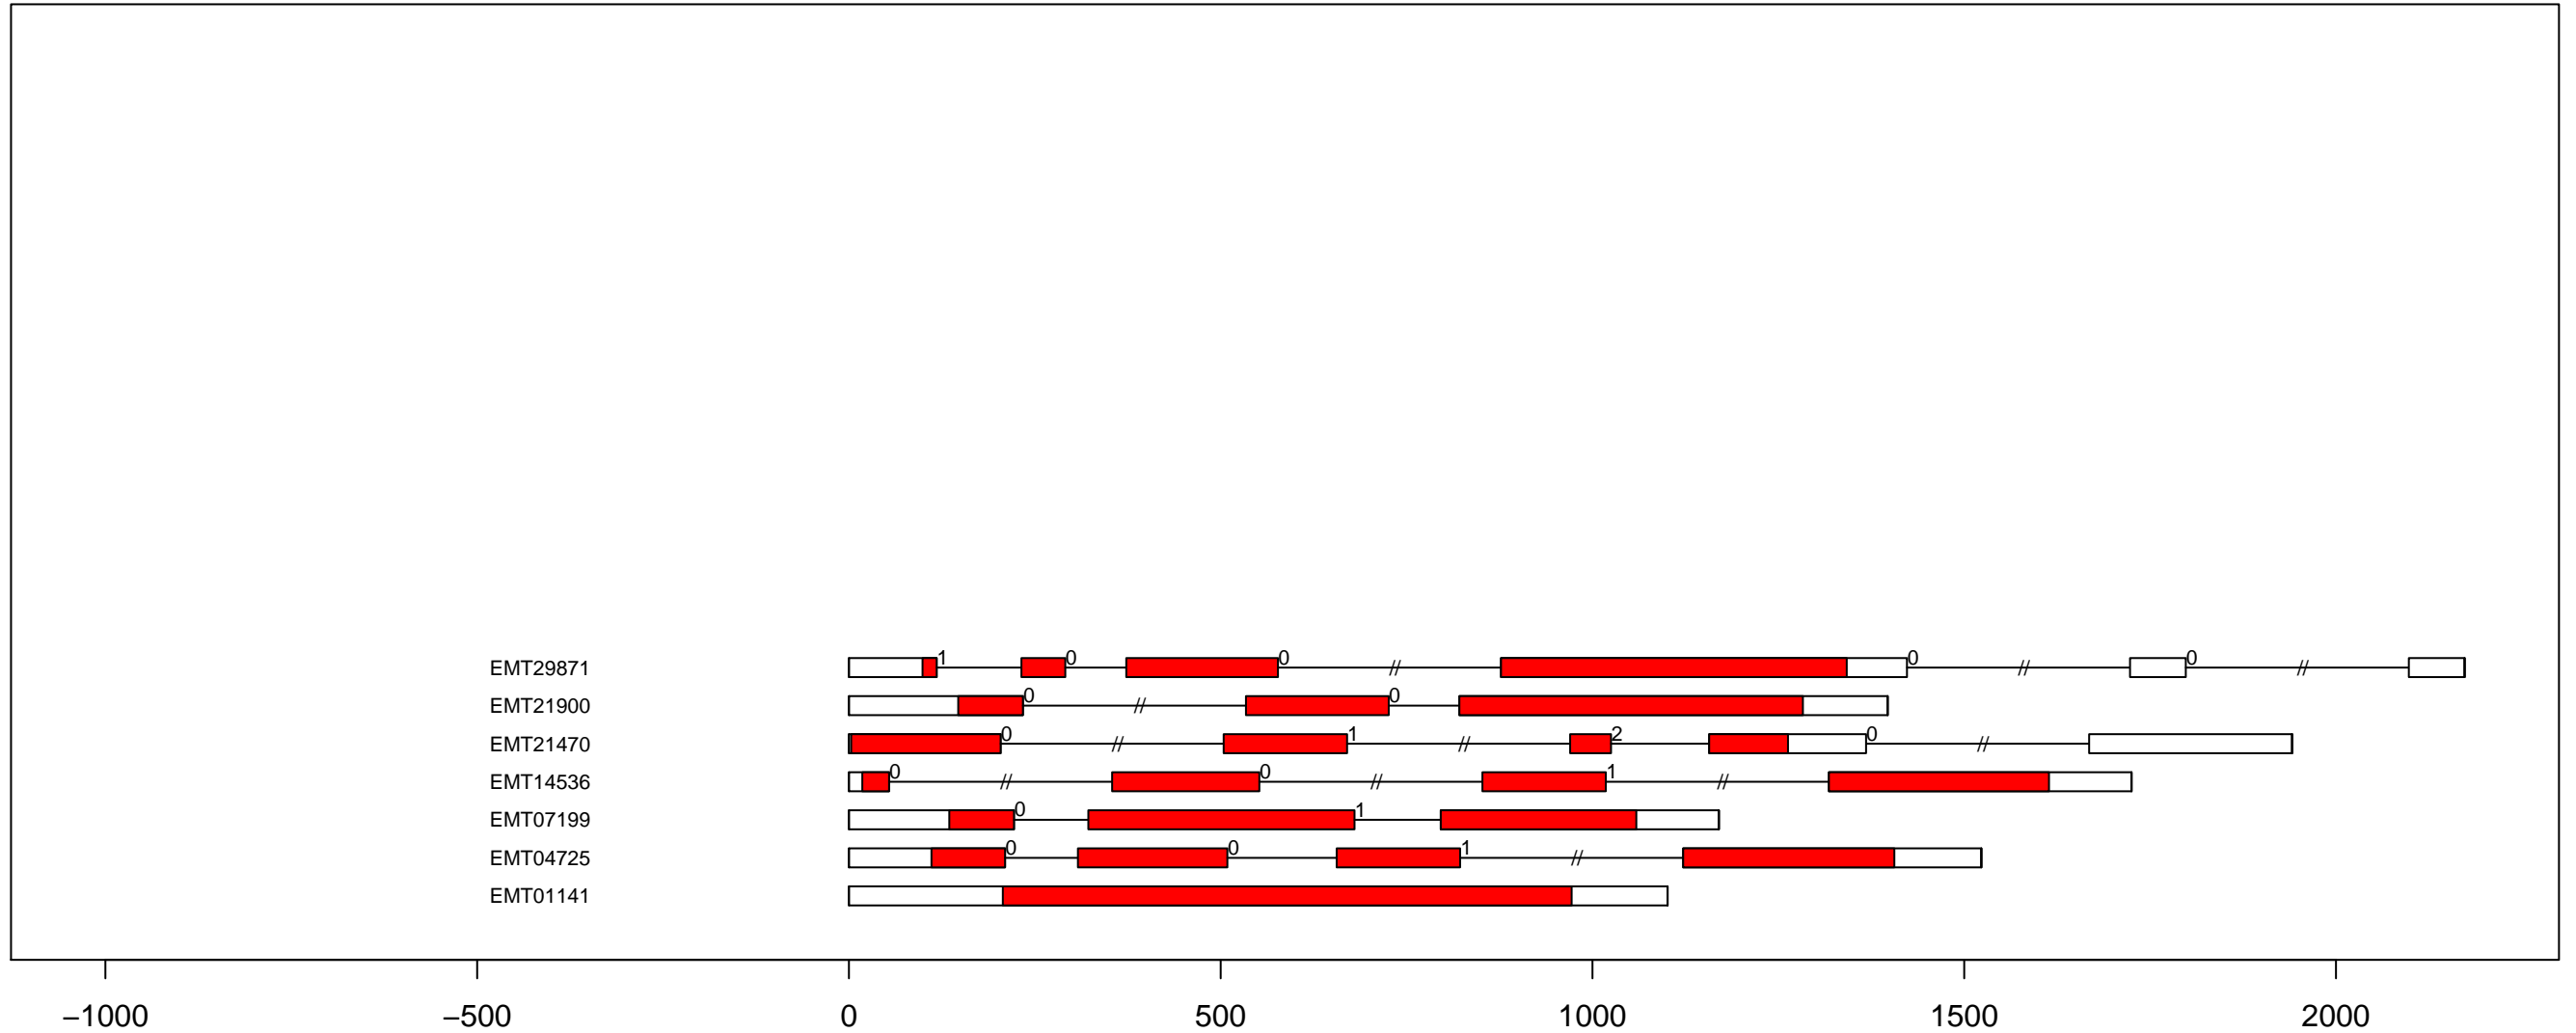

# A.ta class III peroxidase X subfamily exon-intron and prx domain diagram (all)

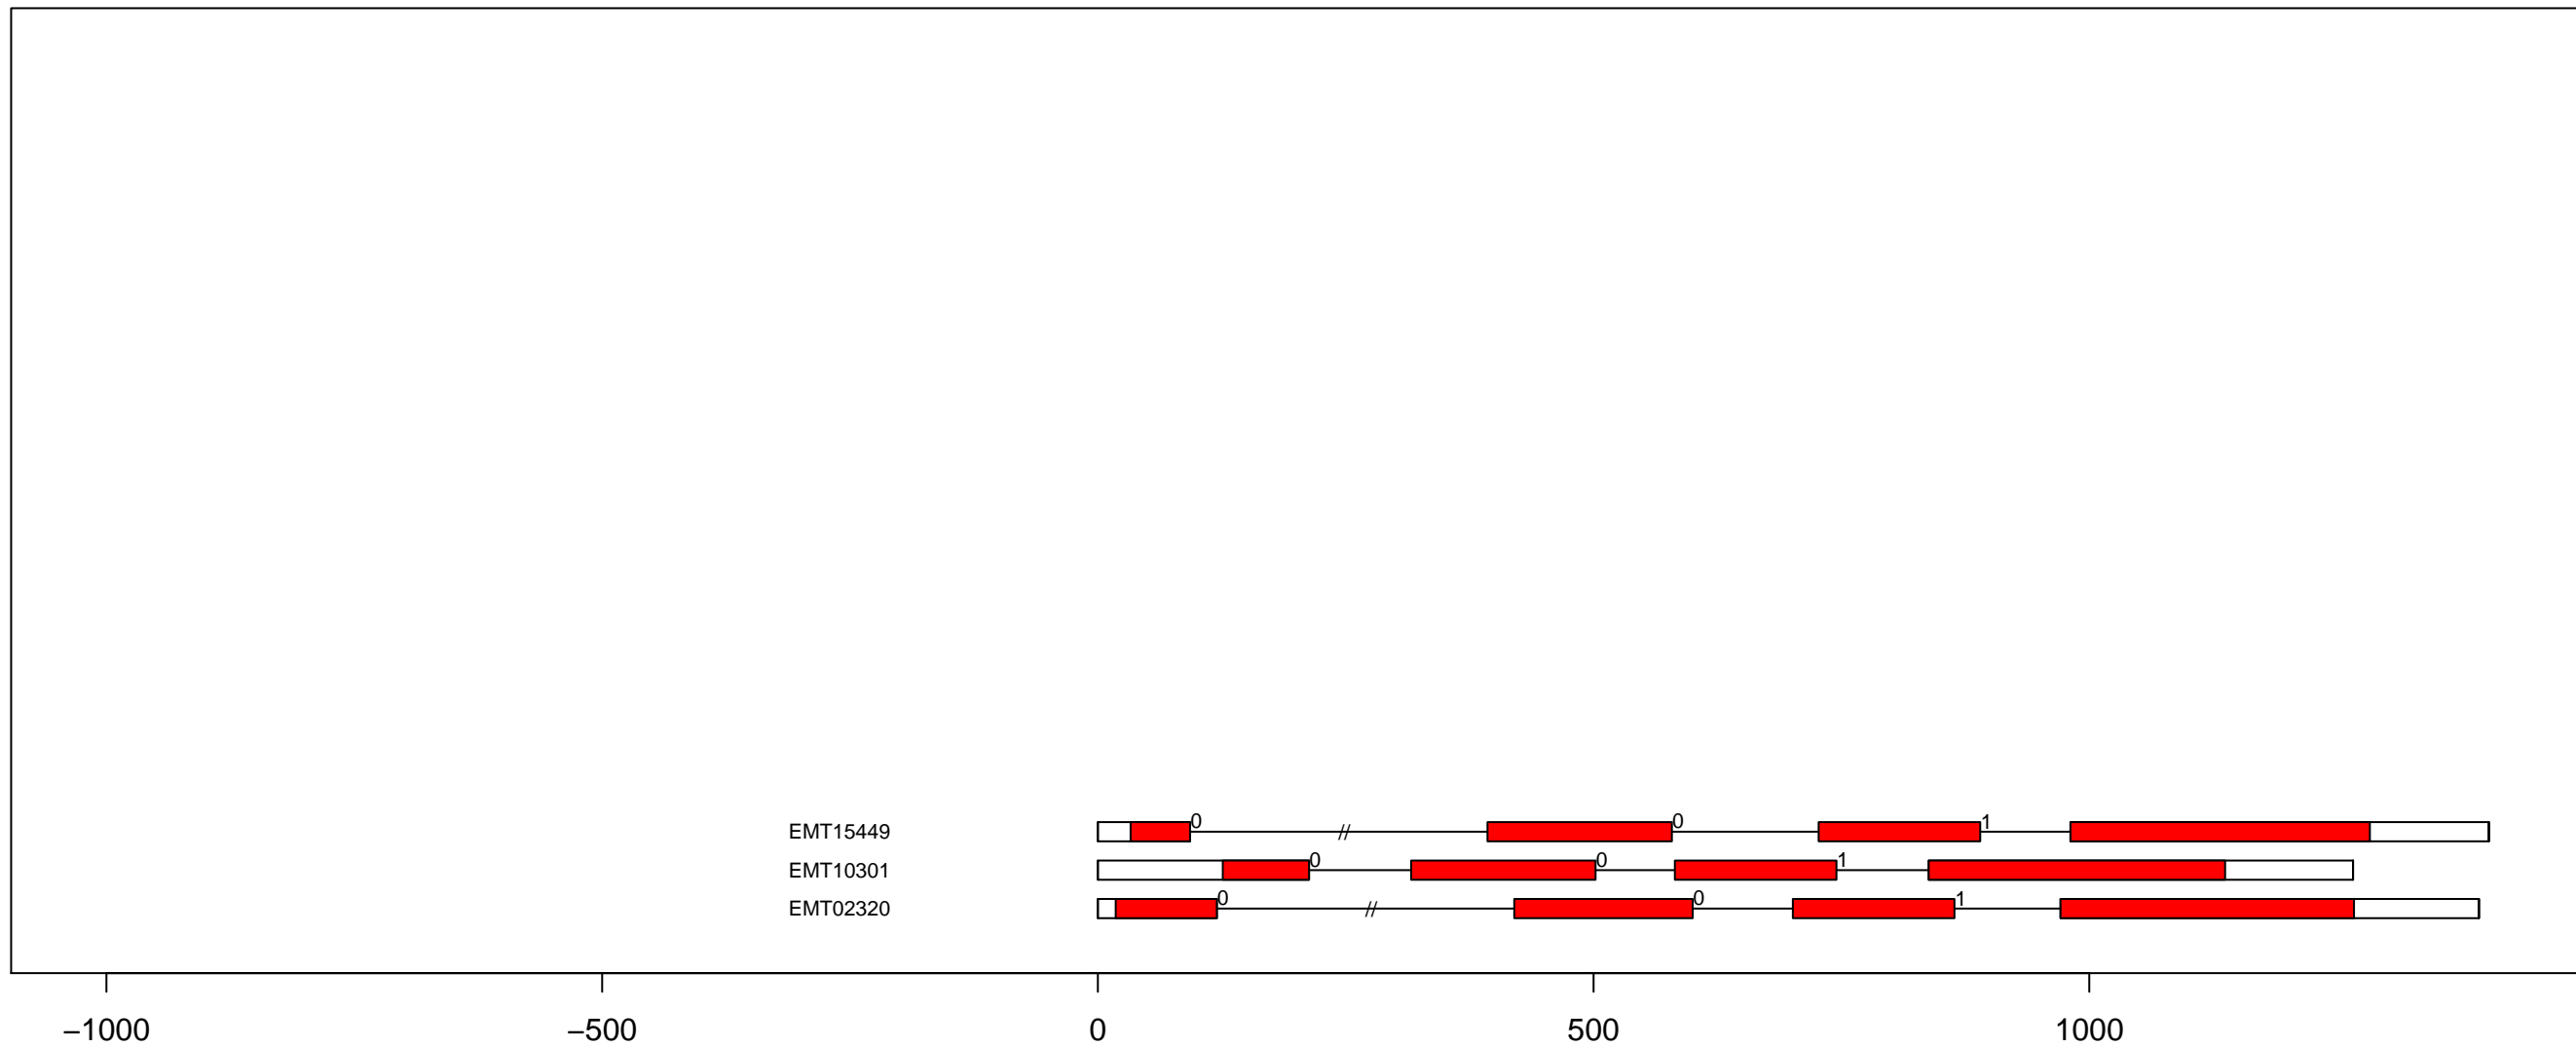

# A.ta class III peroxidase XII subfamily exon-intron and prx domain diagram (all)

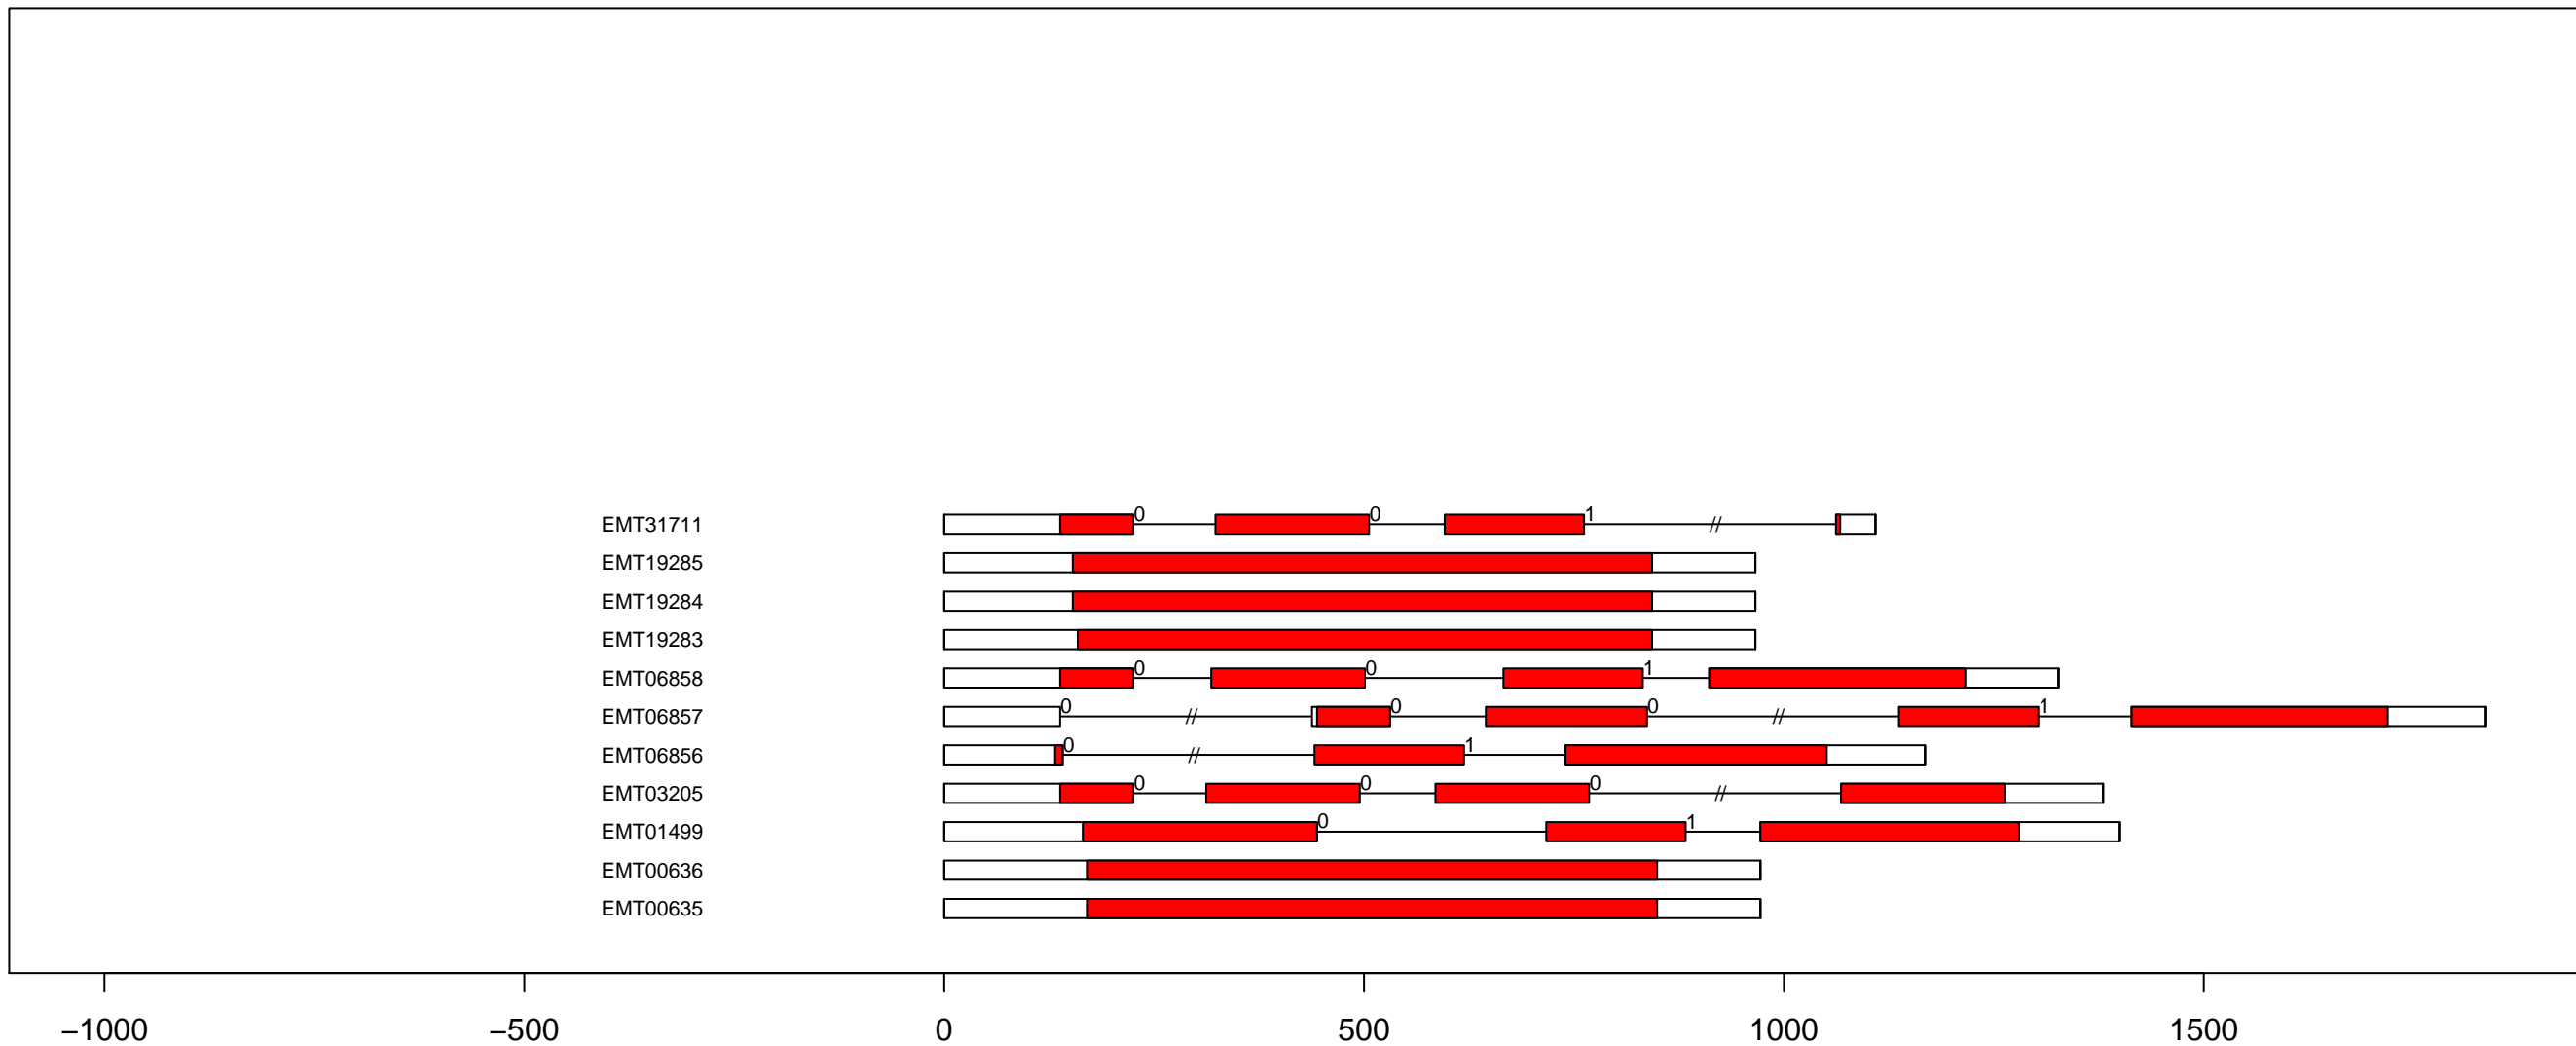

# A.ta class III peroxidase XIV subfamily exon-intron and prx domain diagram (all)

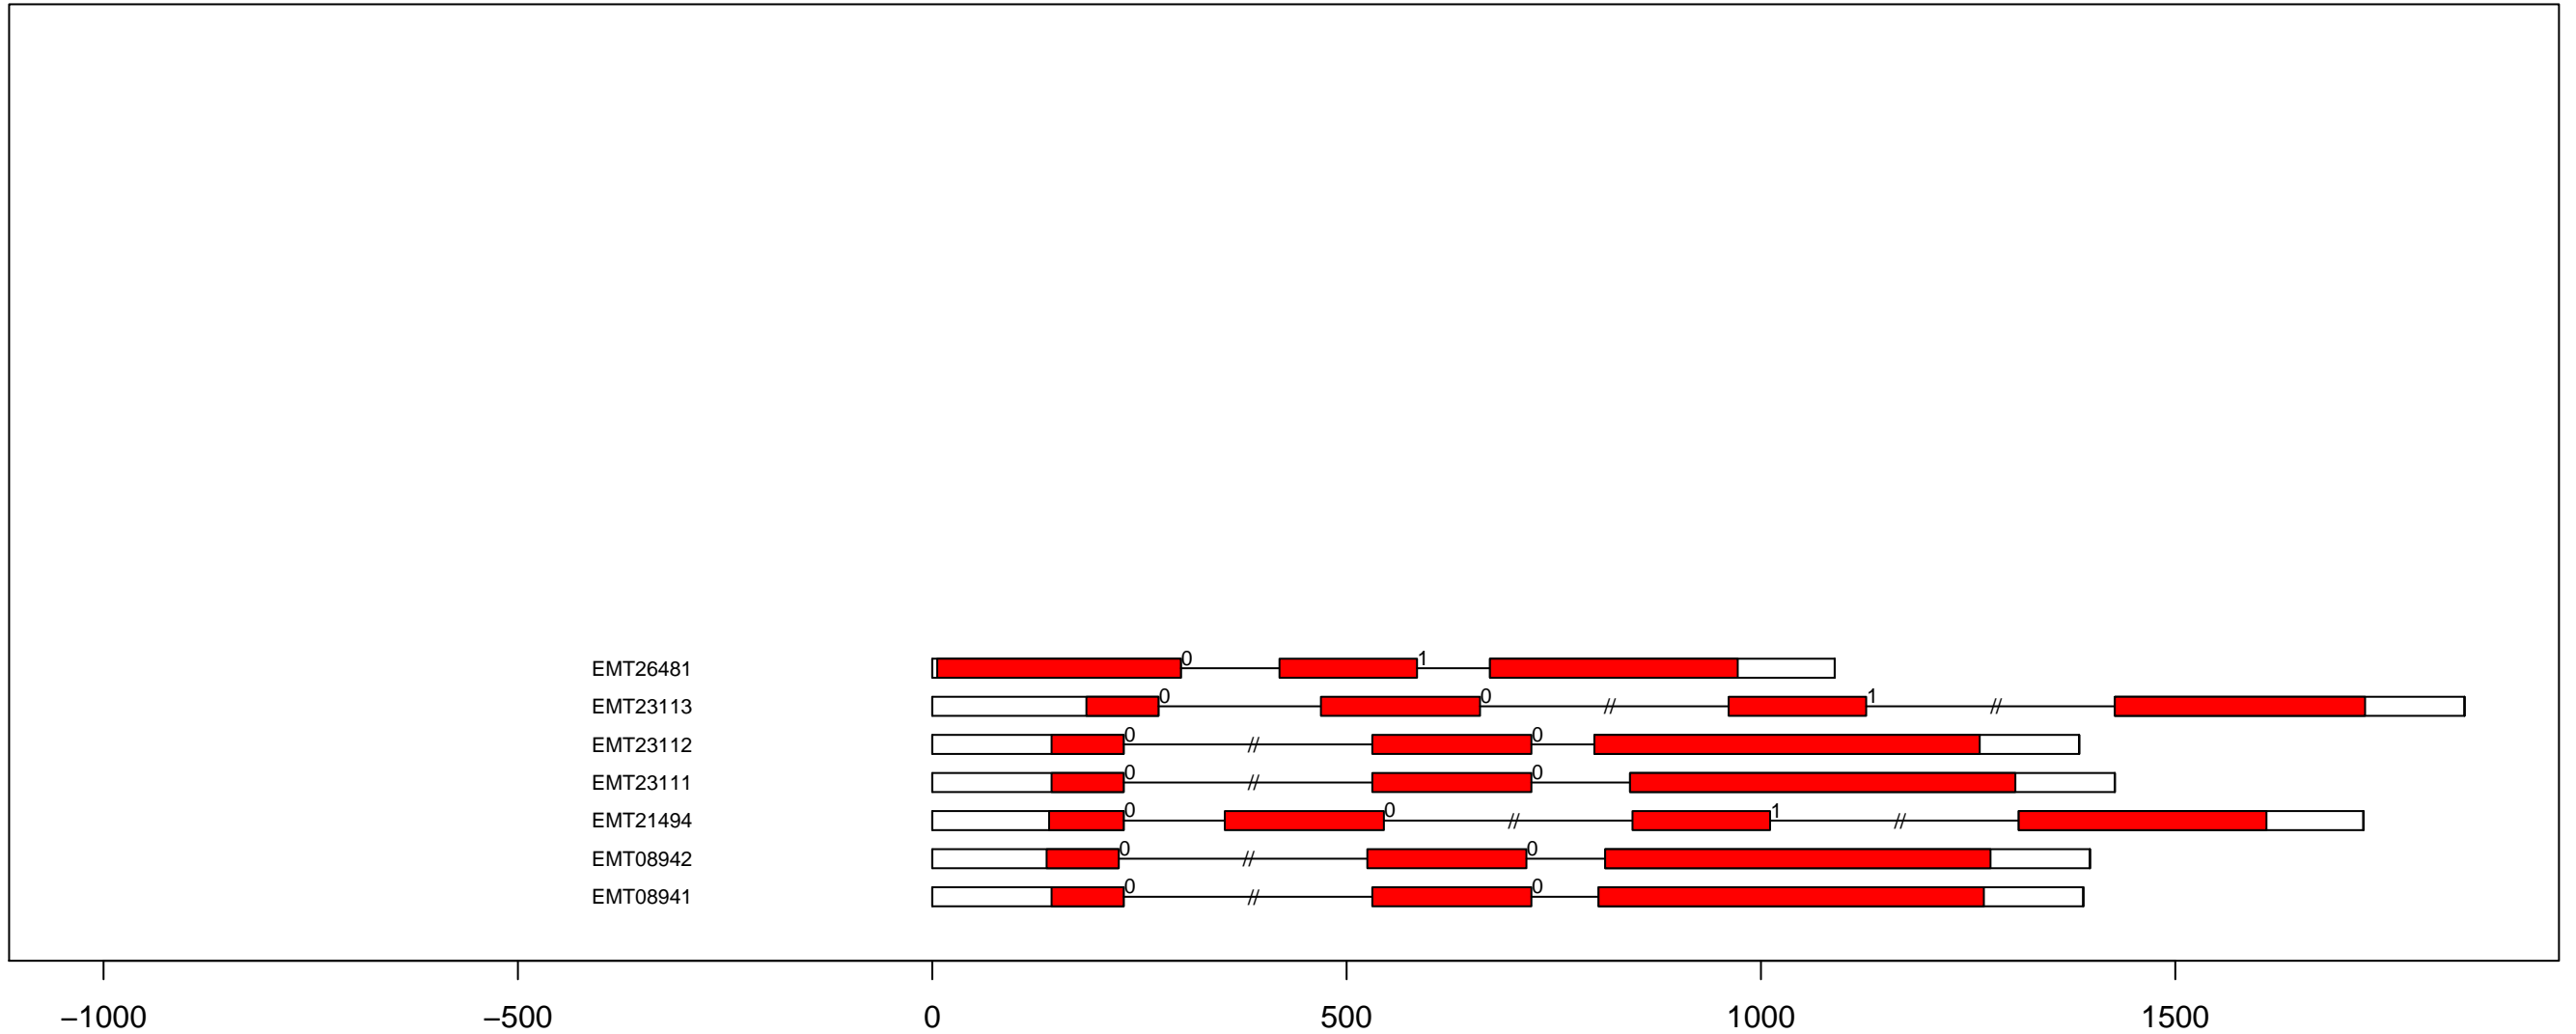

# A.ta class III peroxidase XV subfamily exon-intron and prx domain diagram (all)

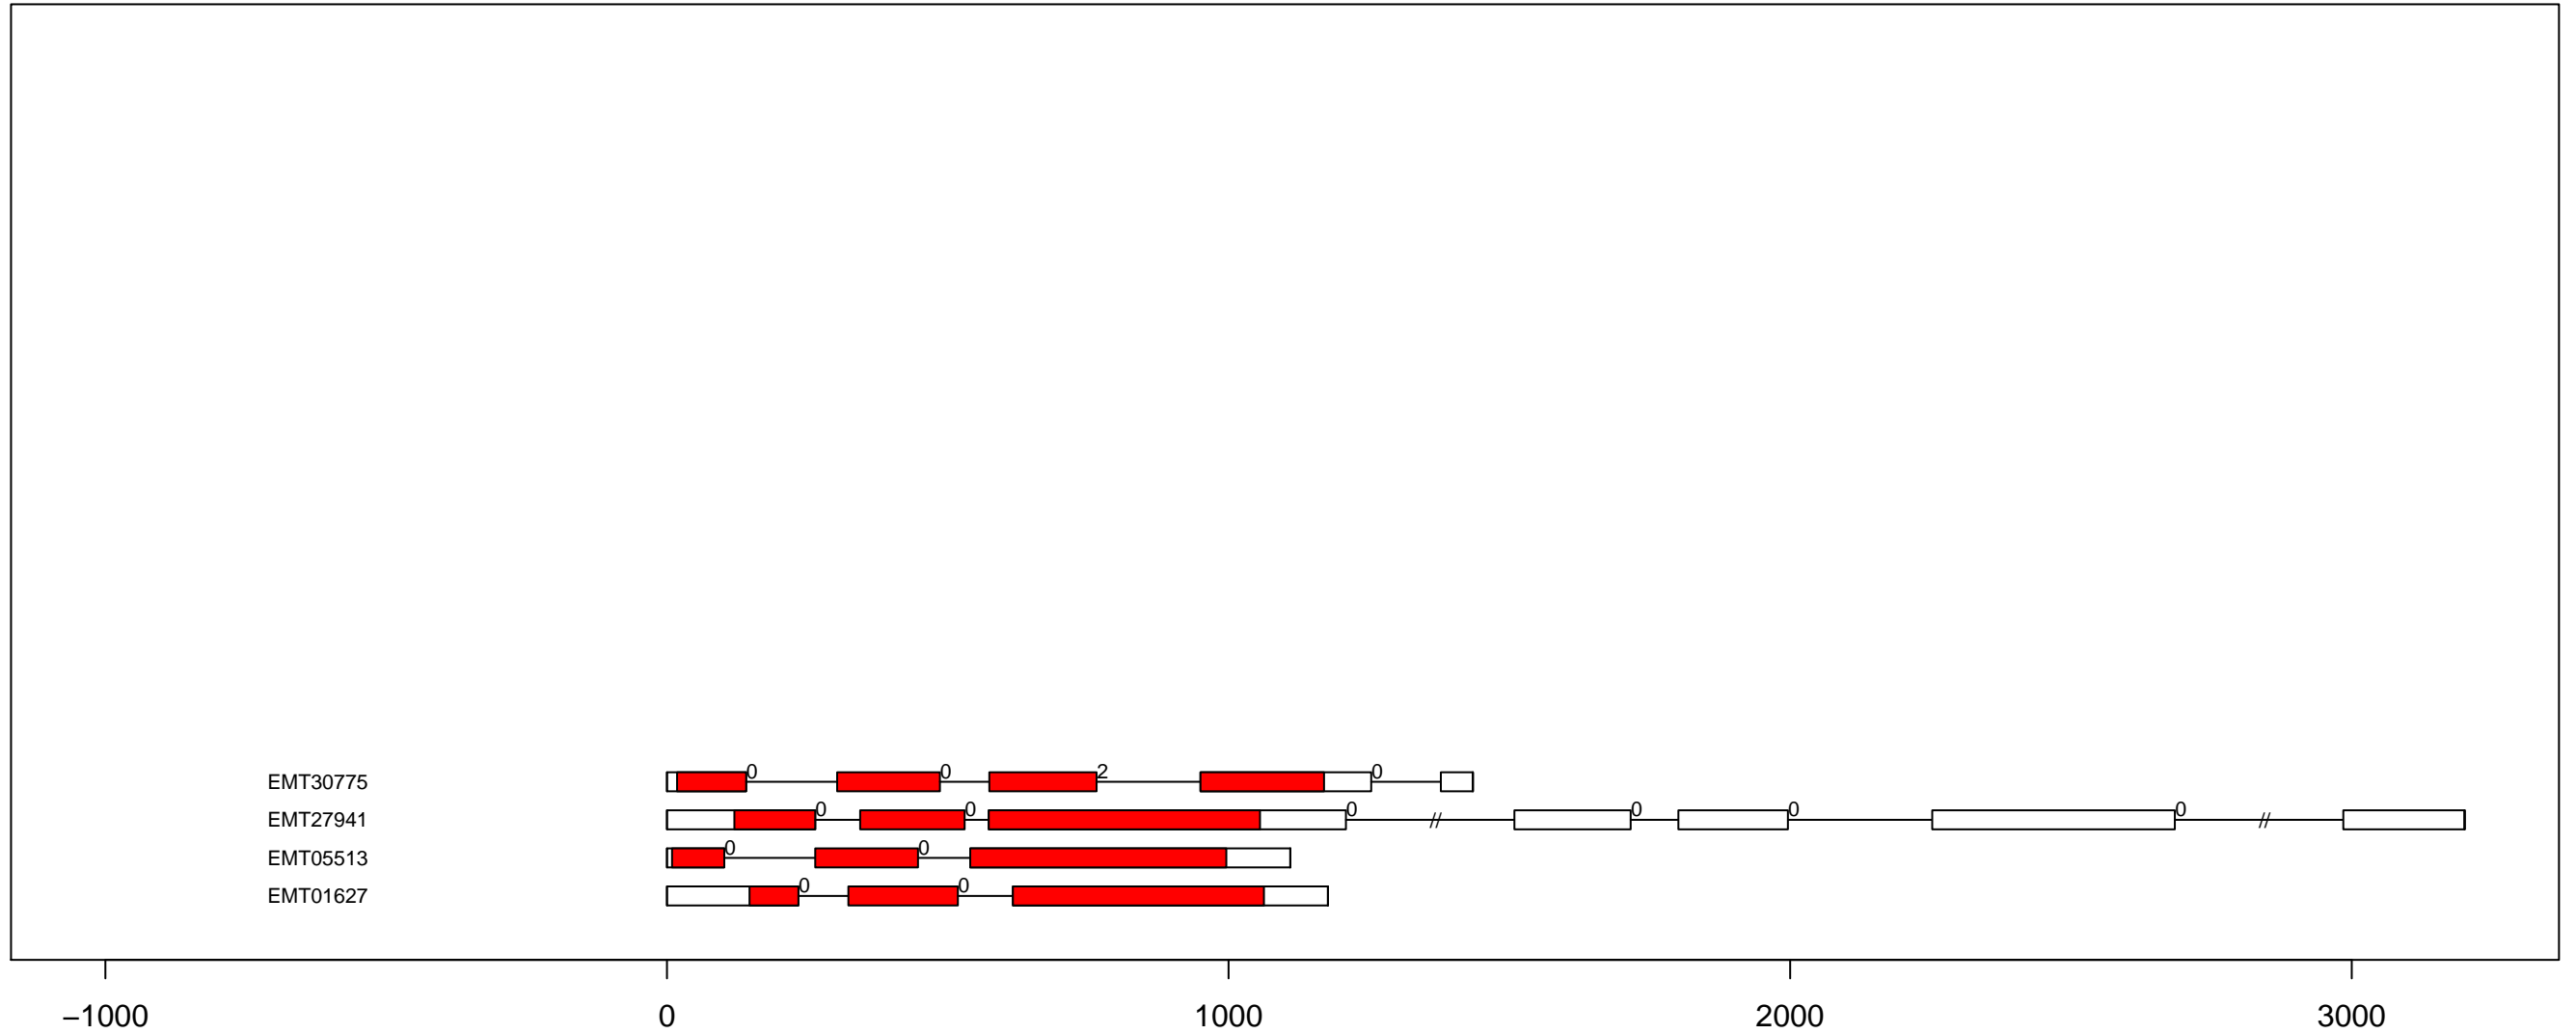



### A.ta class III peroxidase XVI subfamily exon-intron and prx domain diagram (part 1)

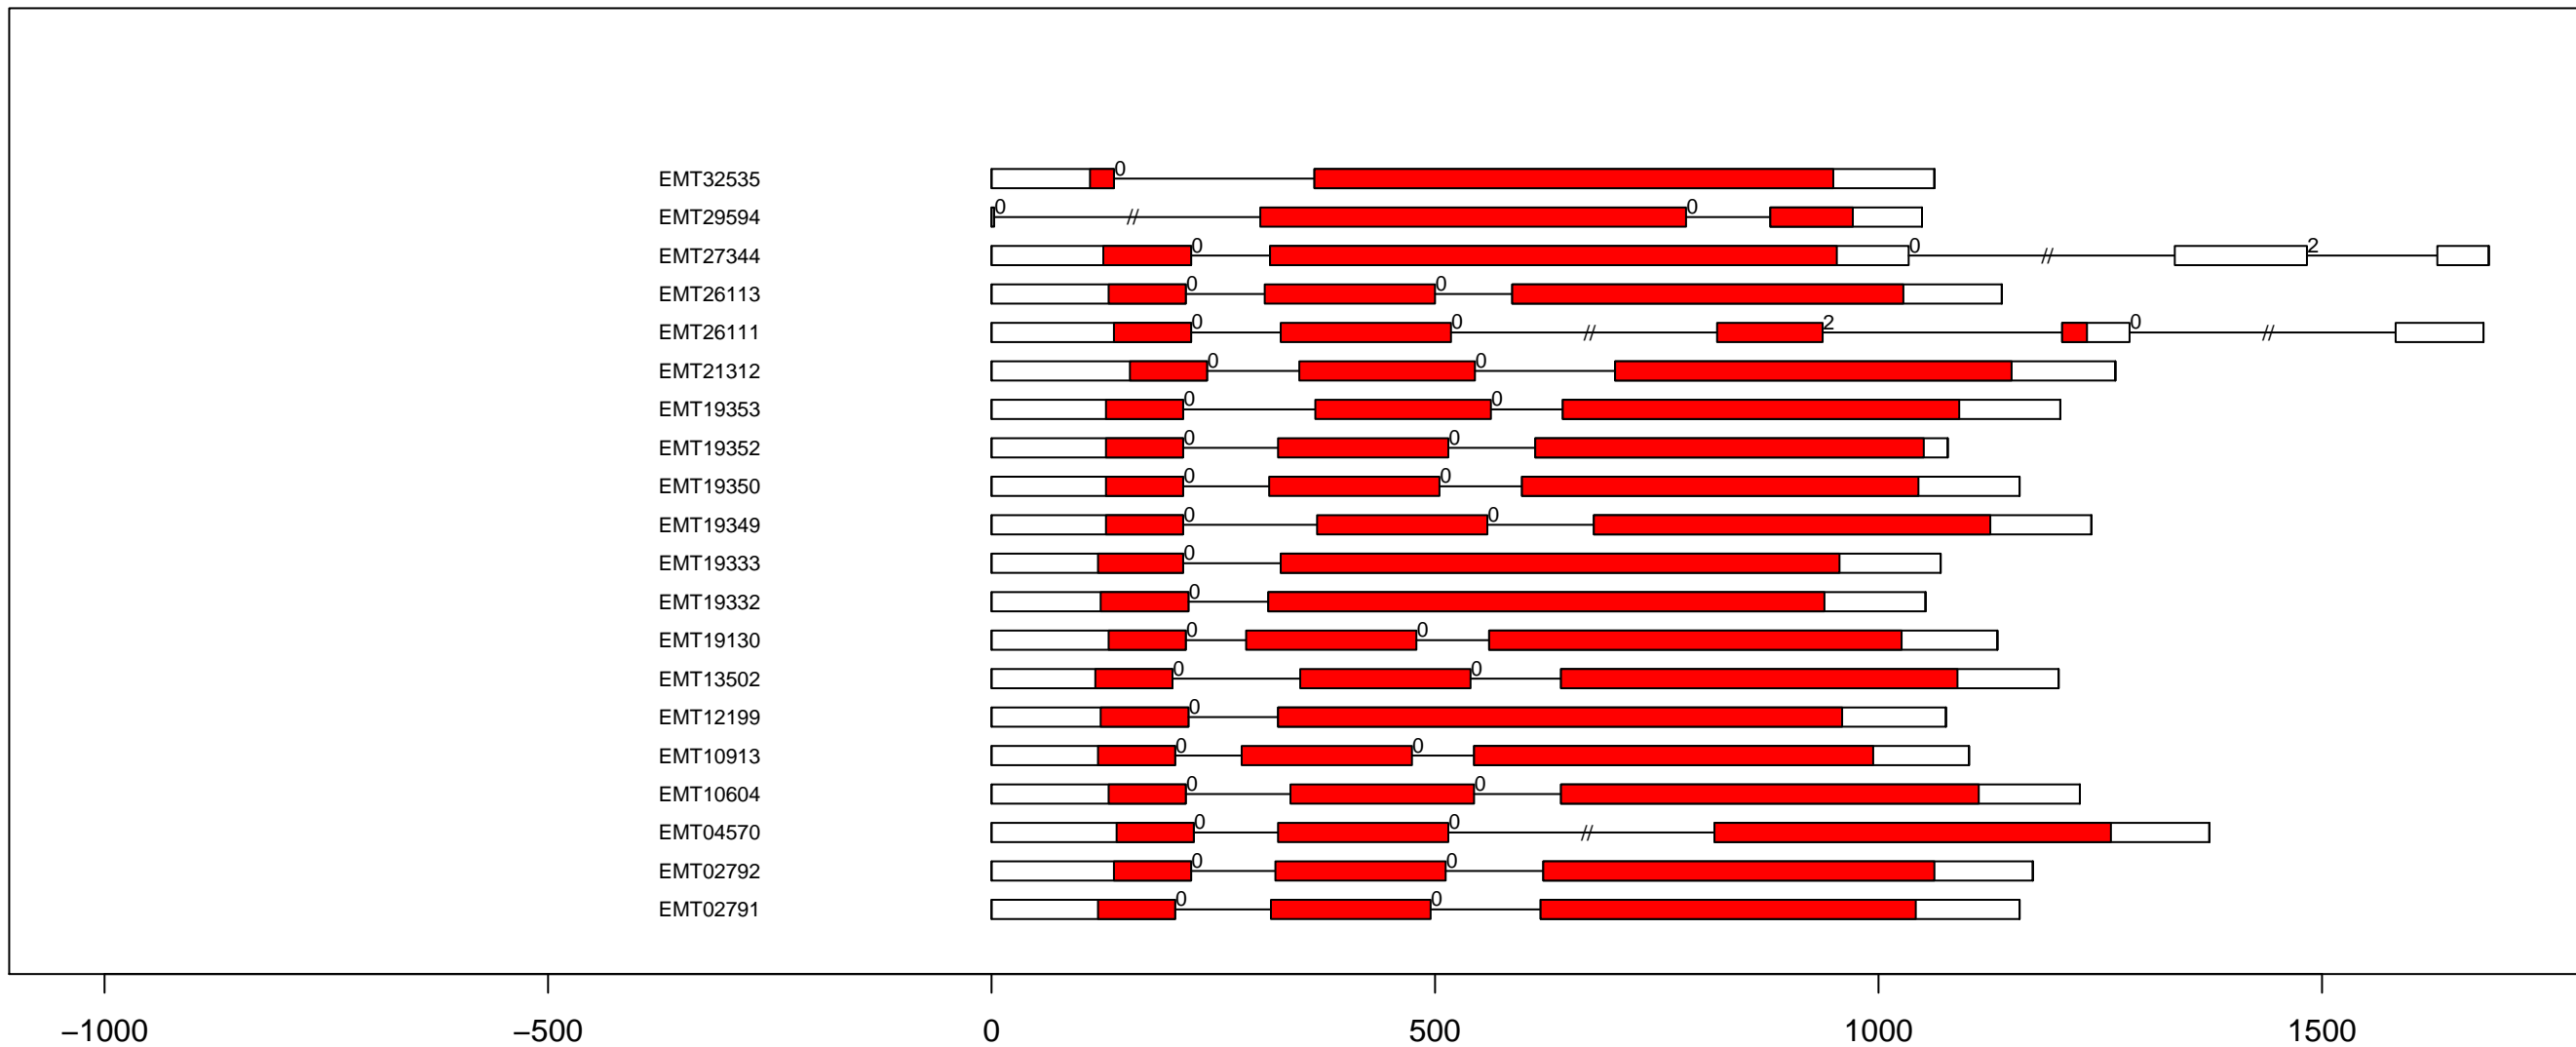

# A.ta class III peroxidase XVI subfamily exon-intron and prx domain diagram (part 2)

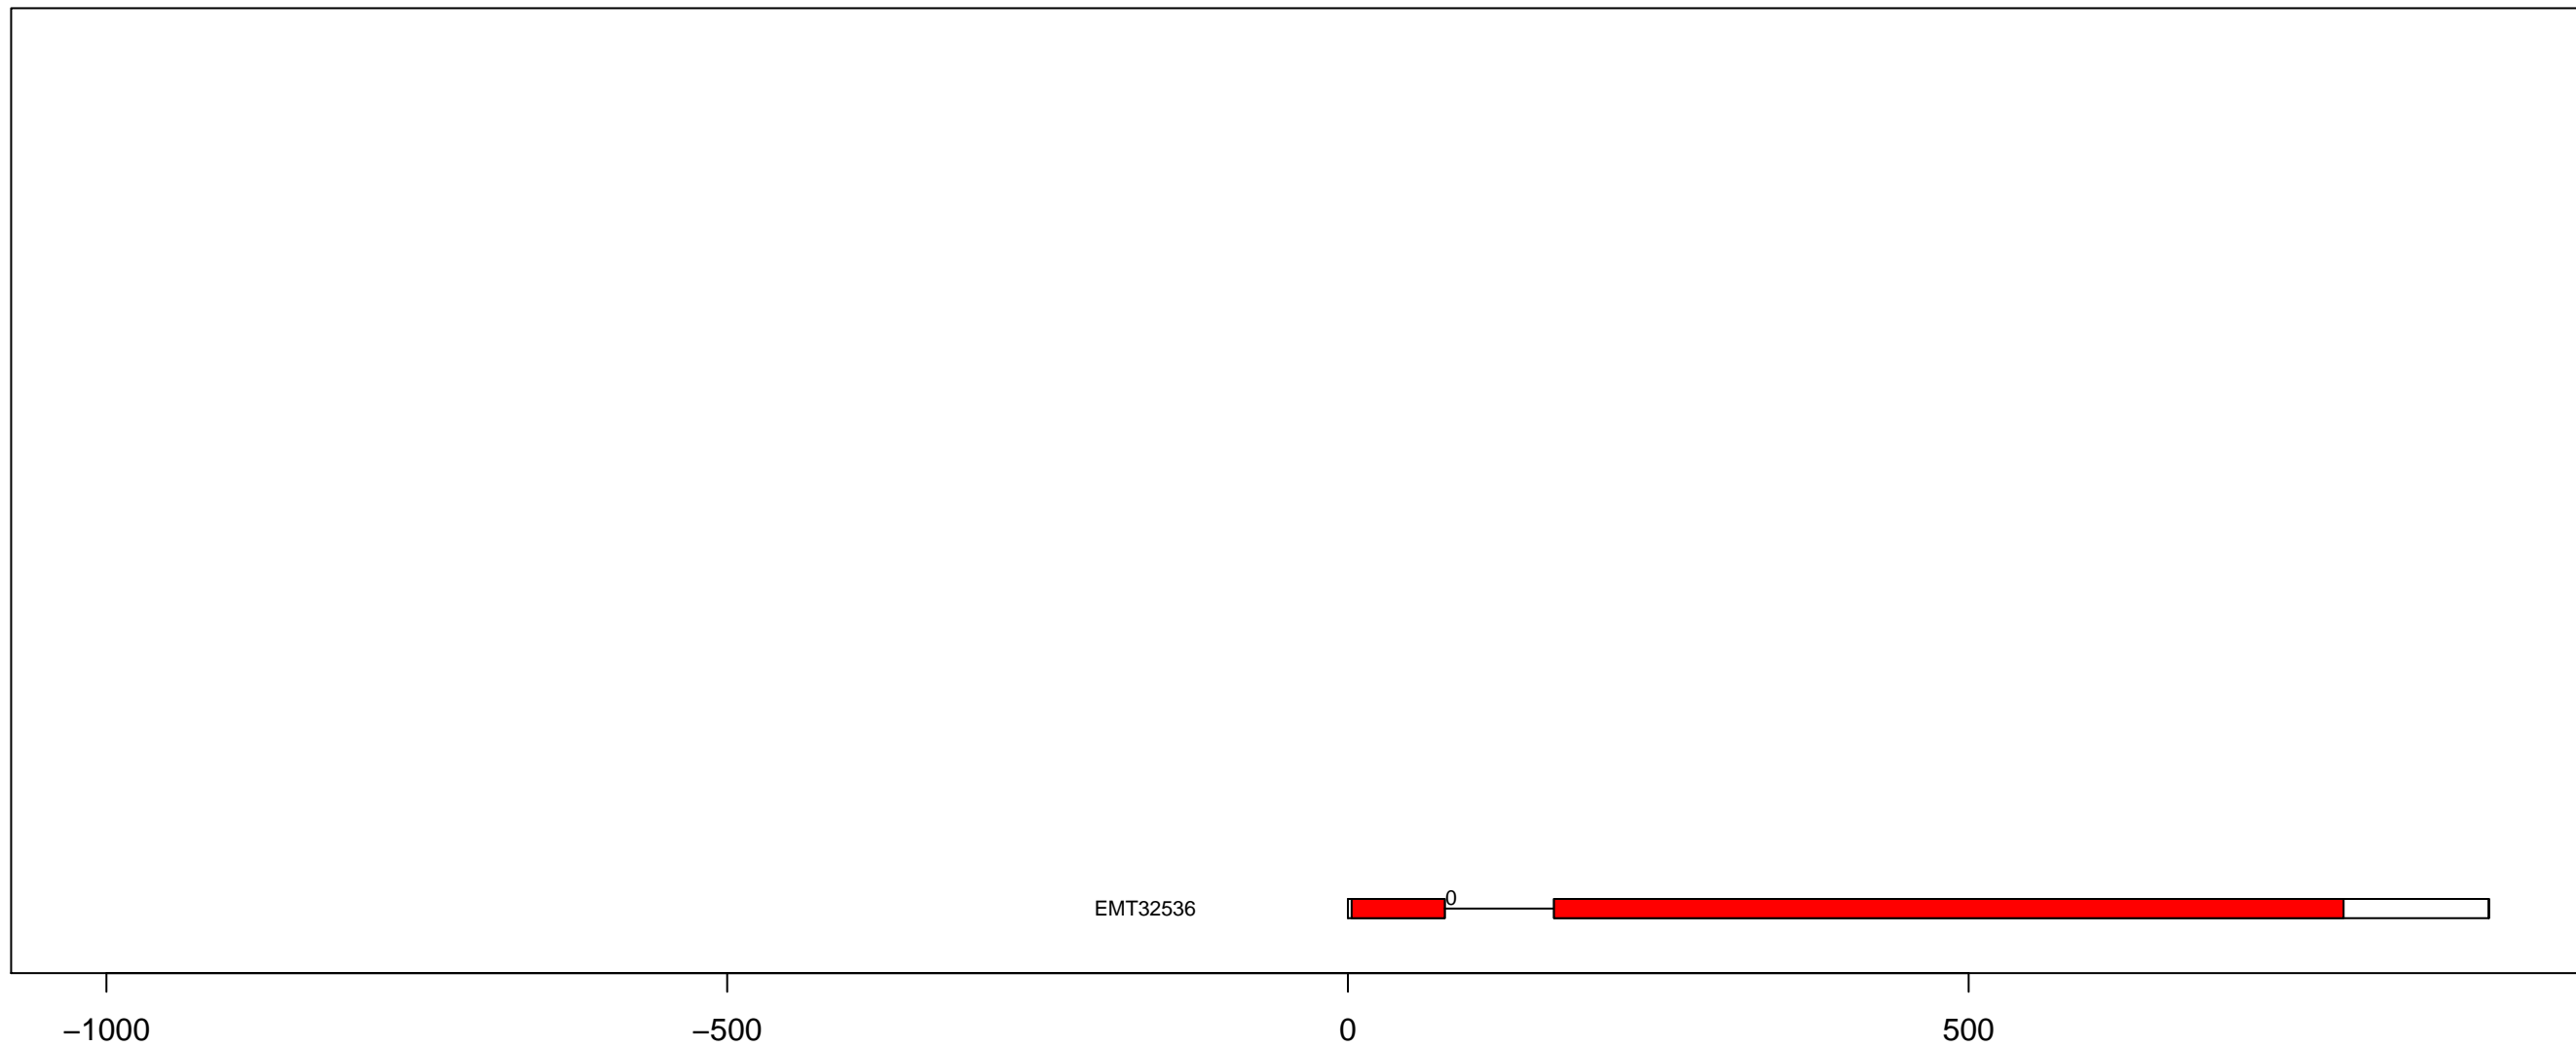

### A.ta class III peroxidase XVII subfamily exon-intron and prx domain diagram (all)

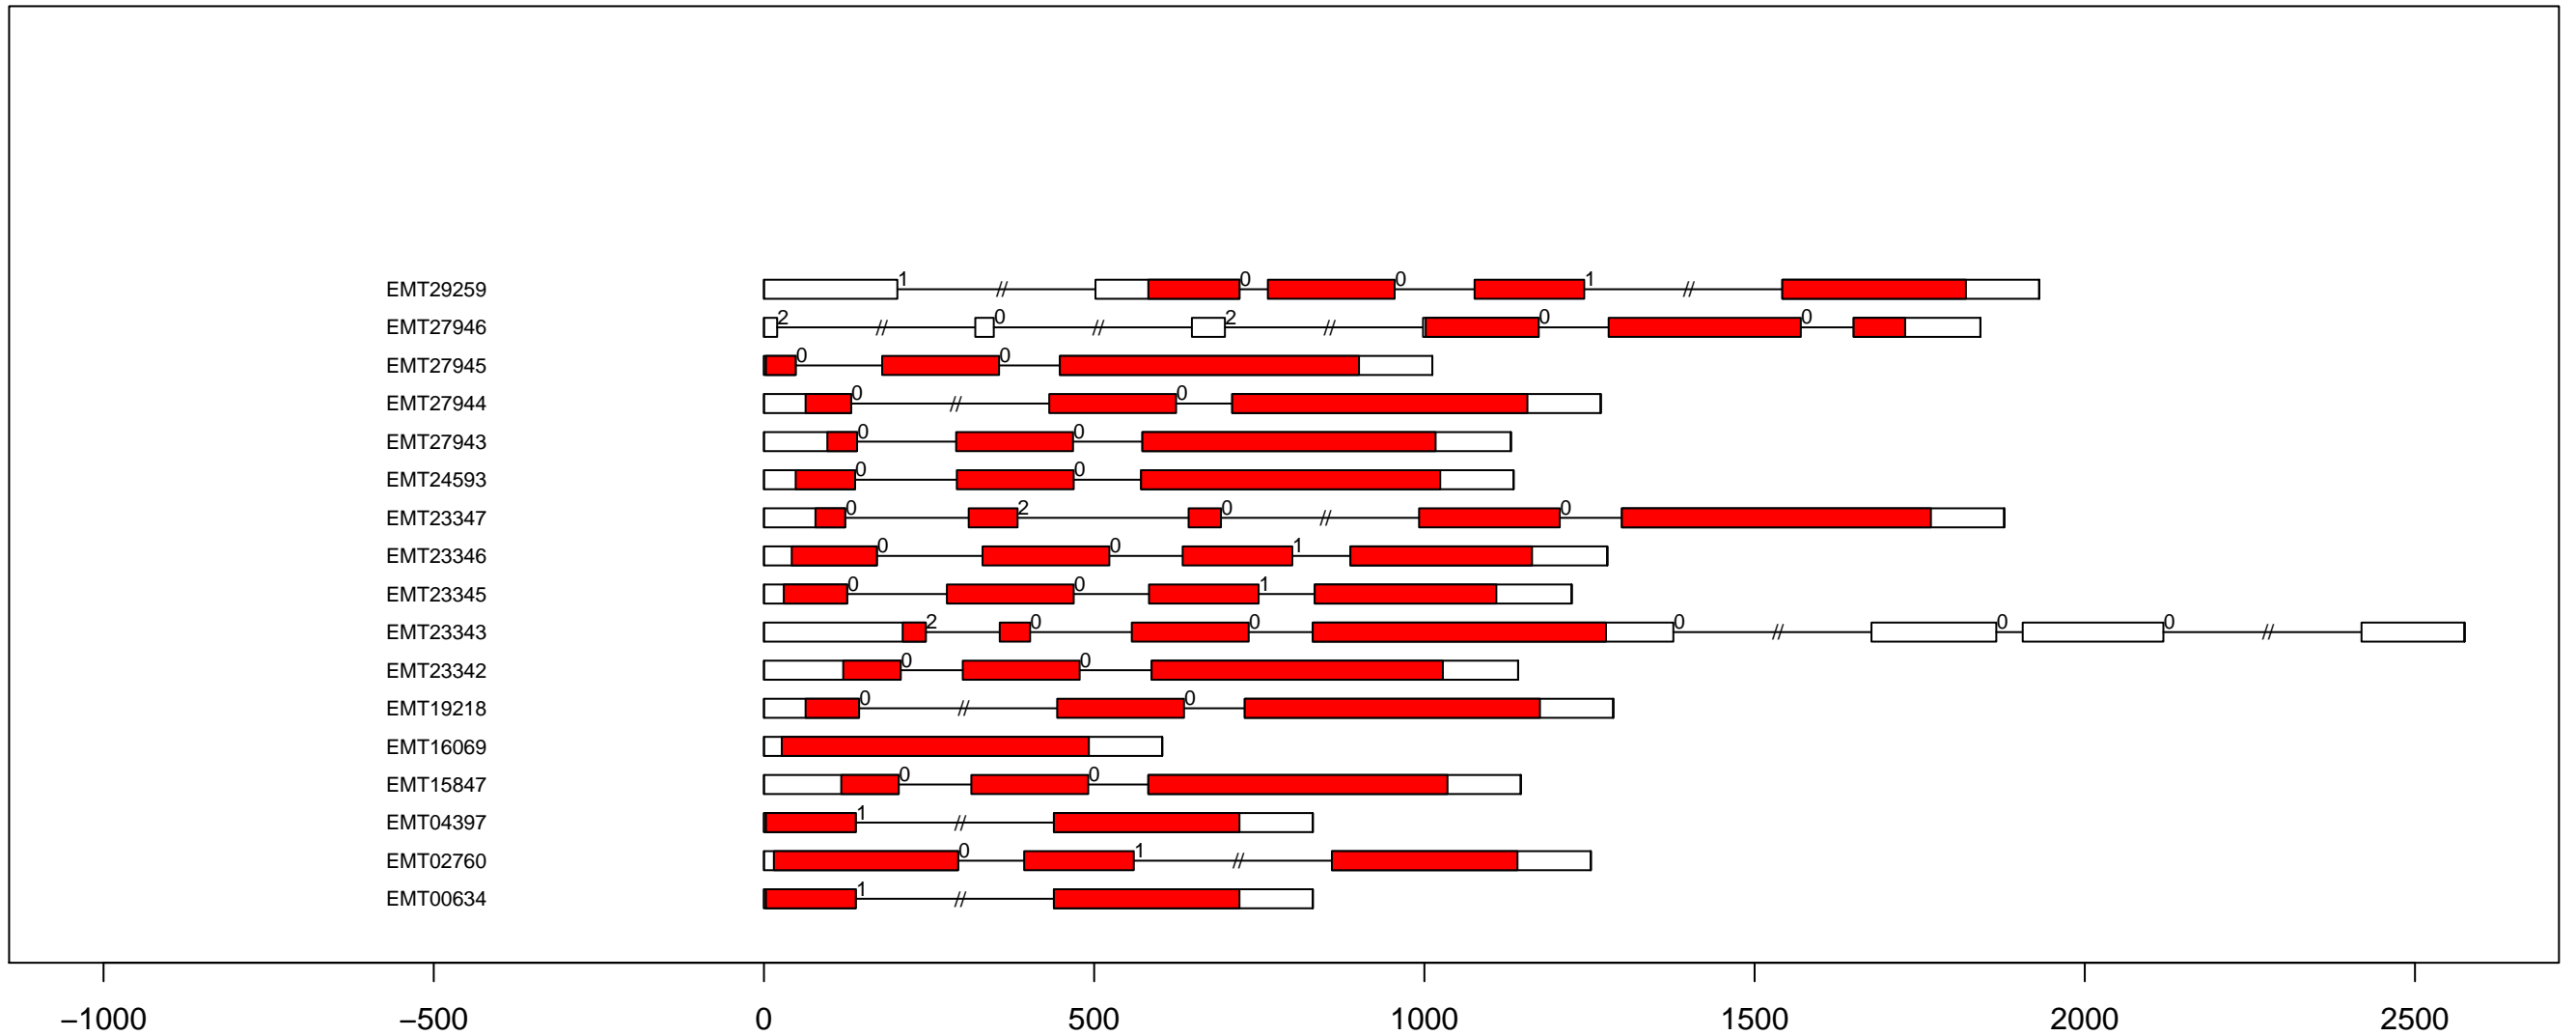

# A.ta class III peroxidase unclar\_classification subfamily exon-intron and prx domain diagram (all)

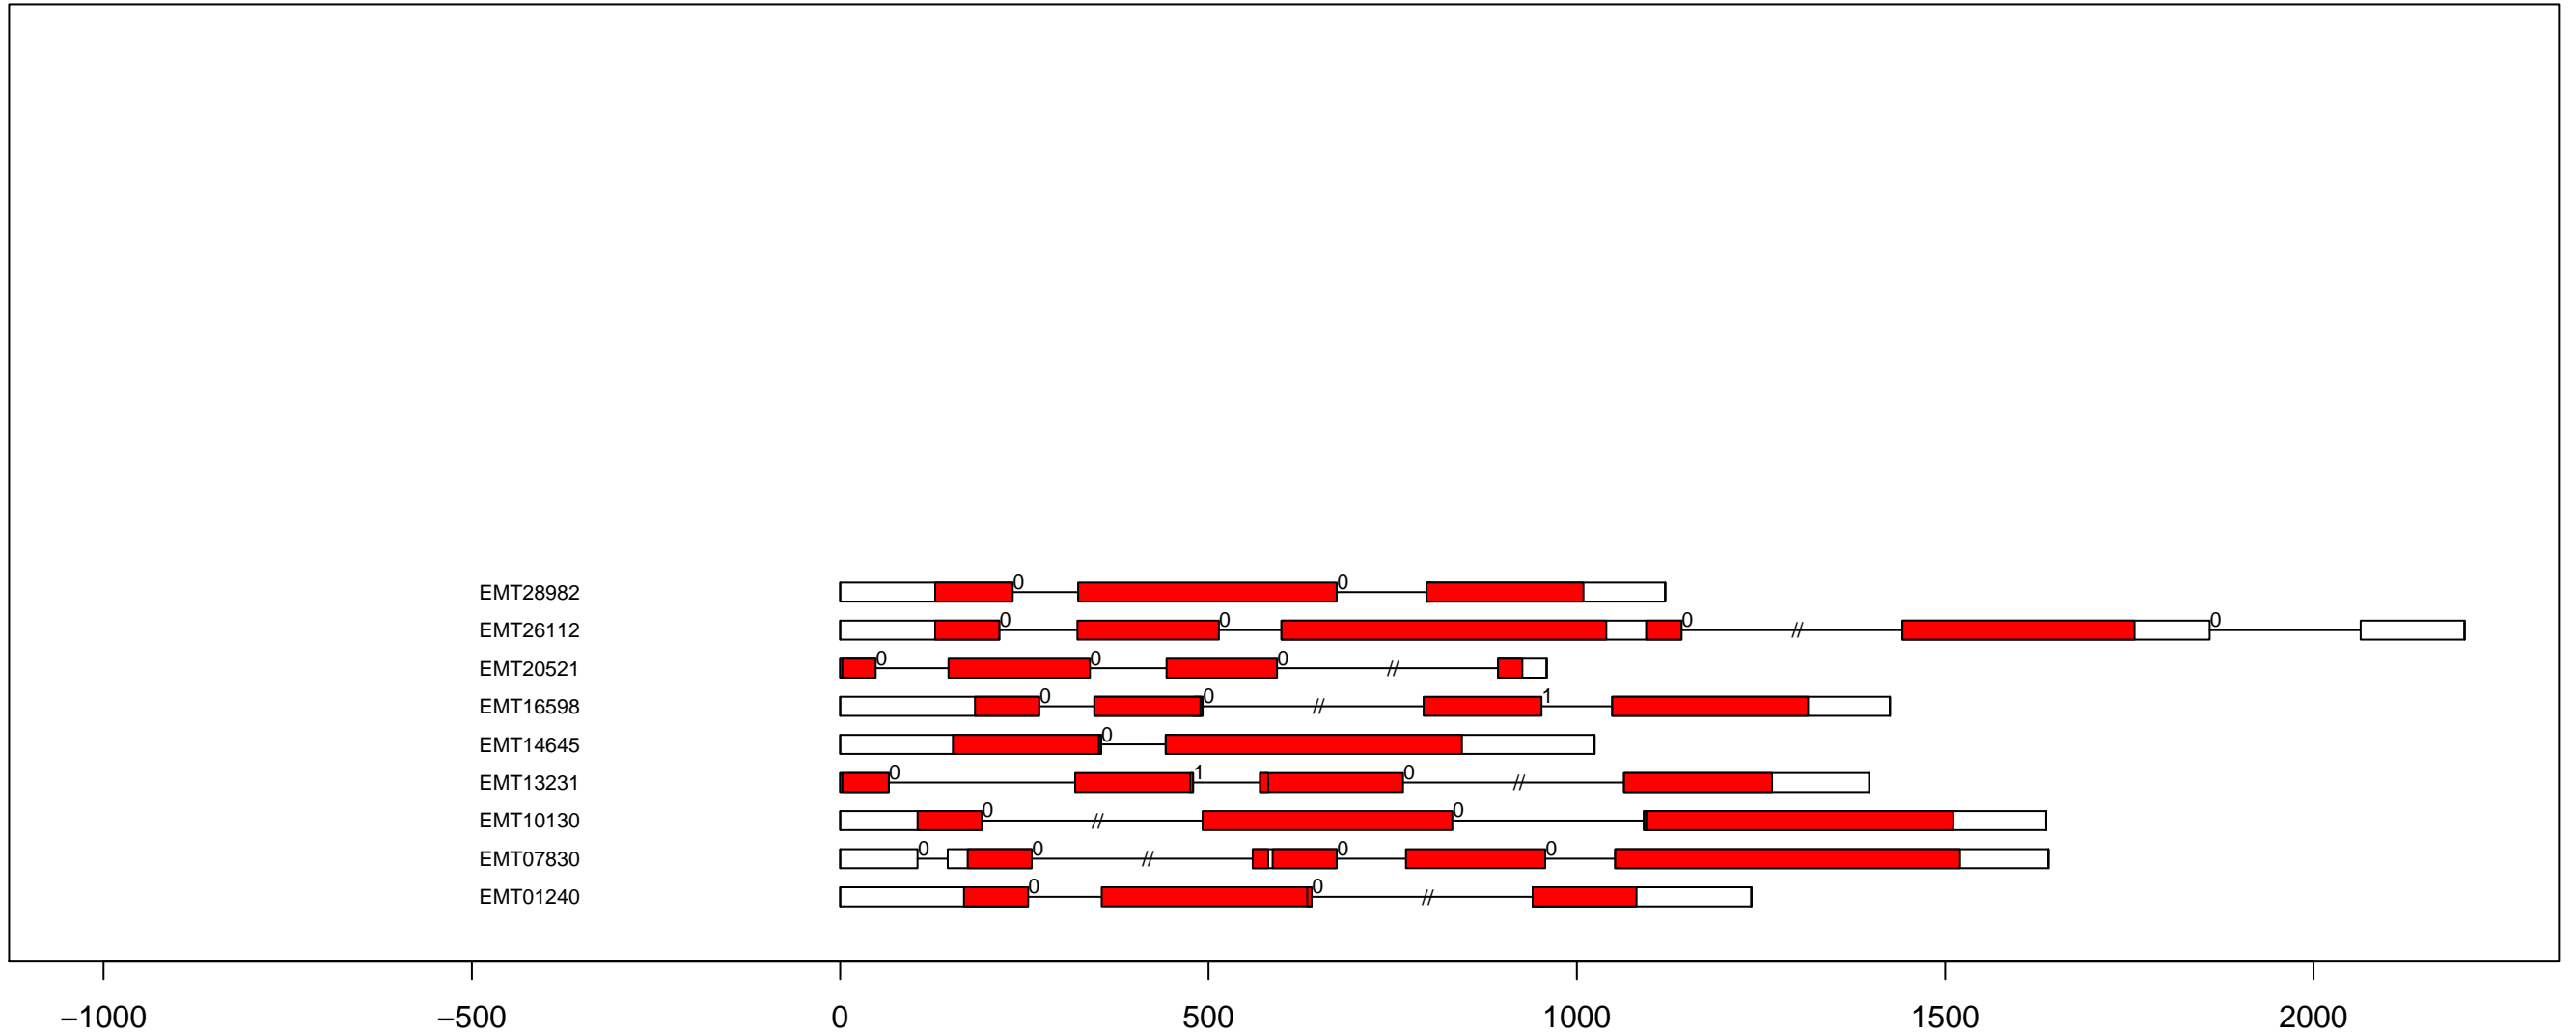

### B.di class III peroxidase I subfamily exon-intron and prx domain diagram (part 1)

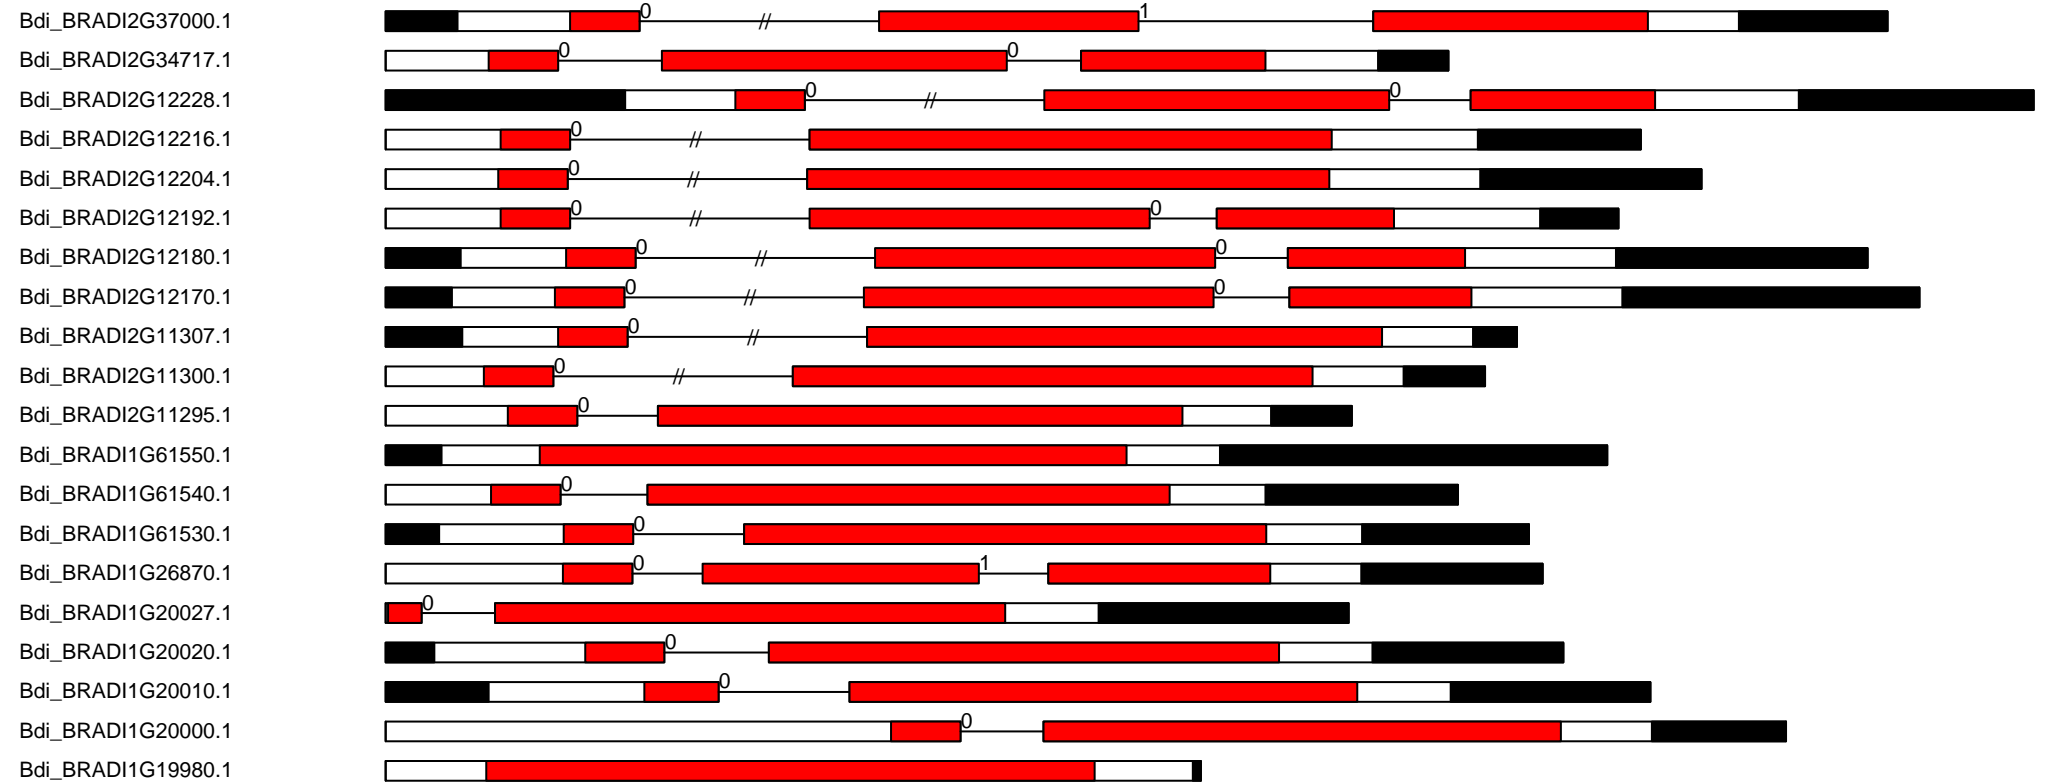

# B.di class III peroxidase I subfamily exon-intron and prx domain diagram (part 2)

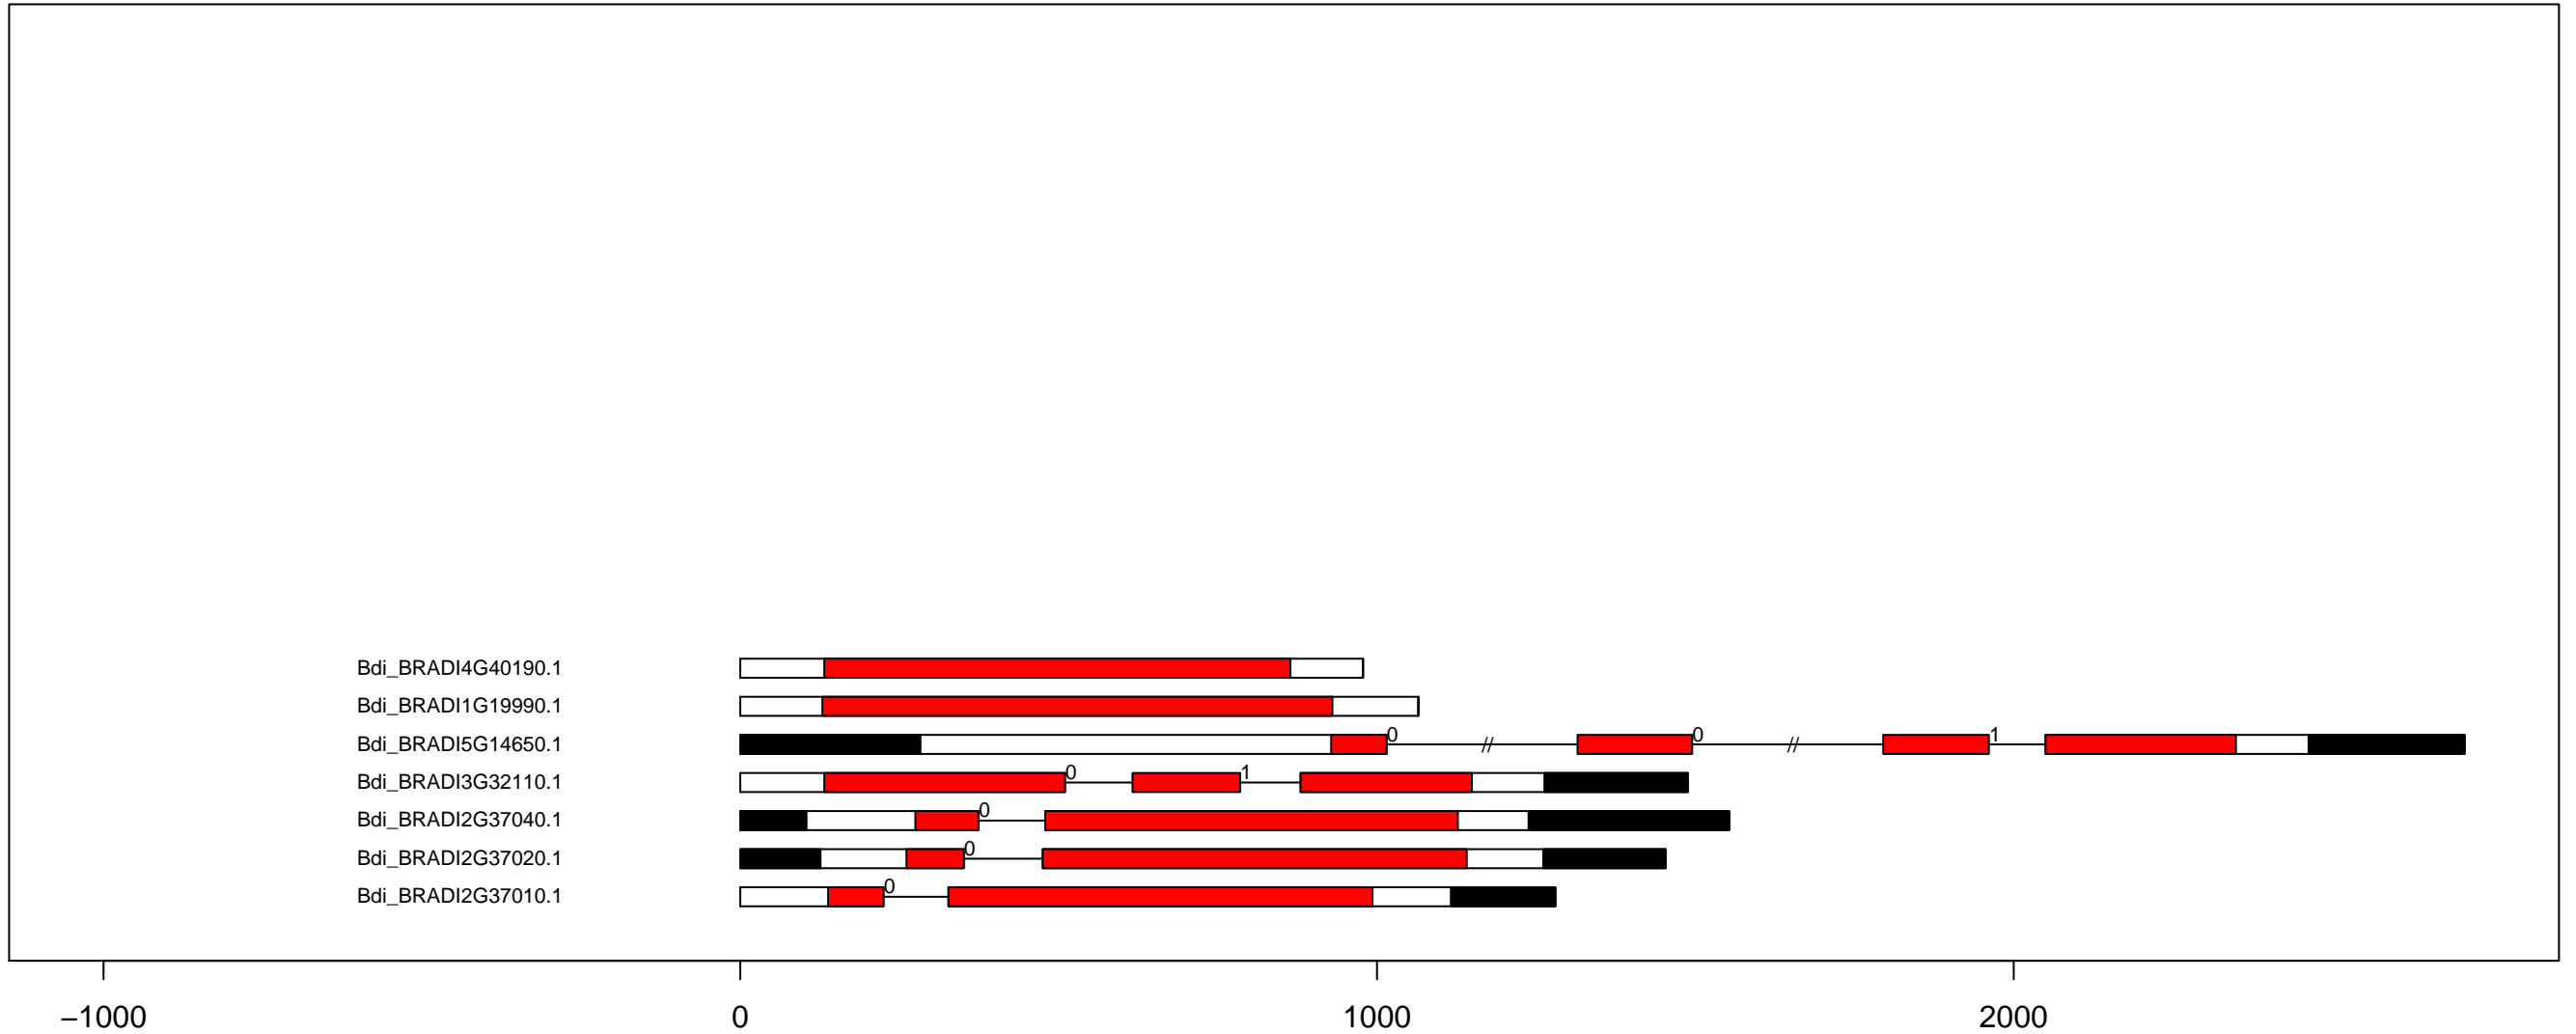

### B.di class III peroxidase II subfamily exon-intron and prx domain diagram (all)

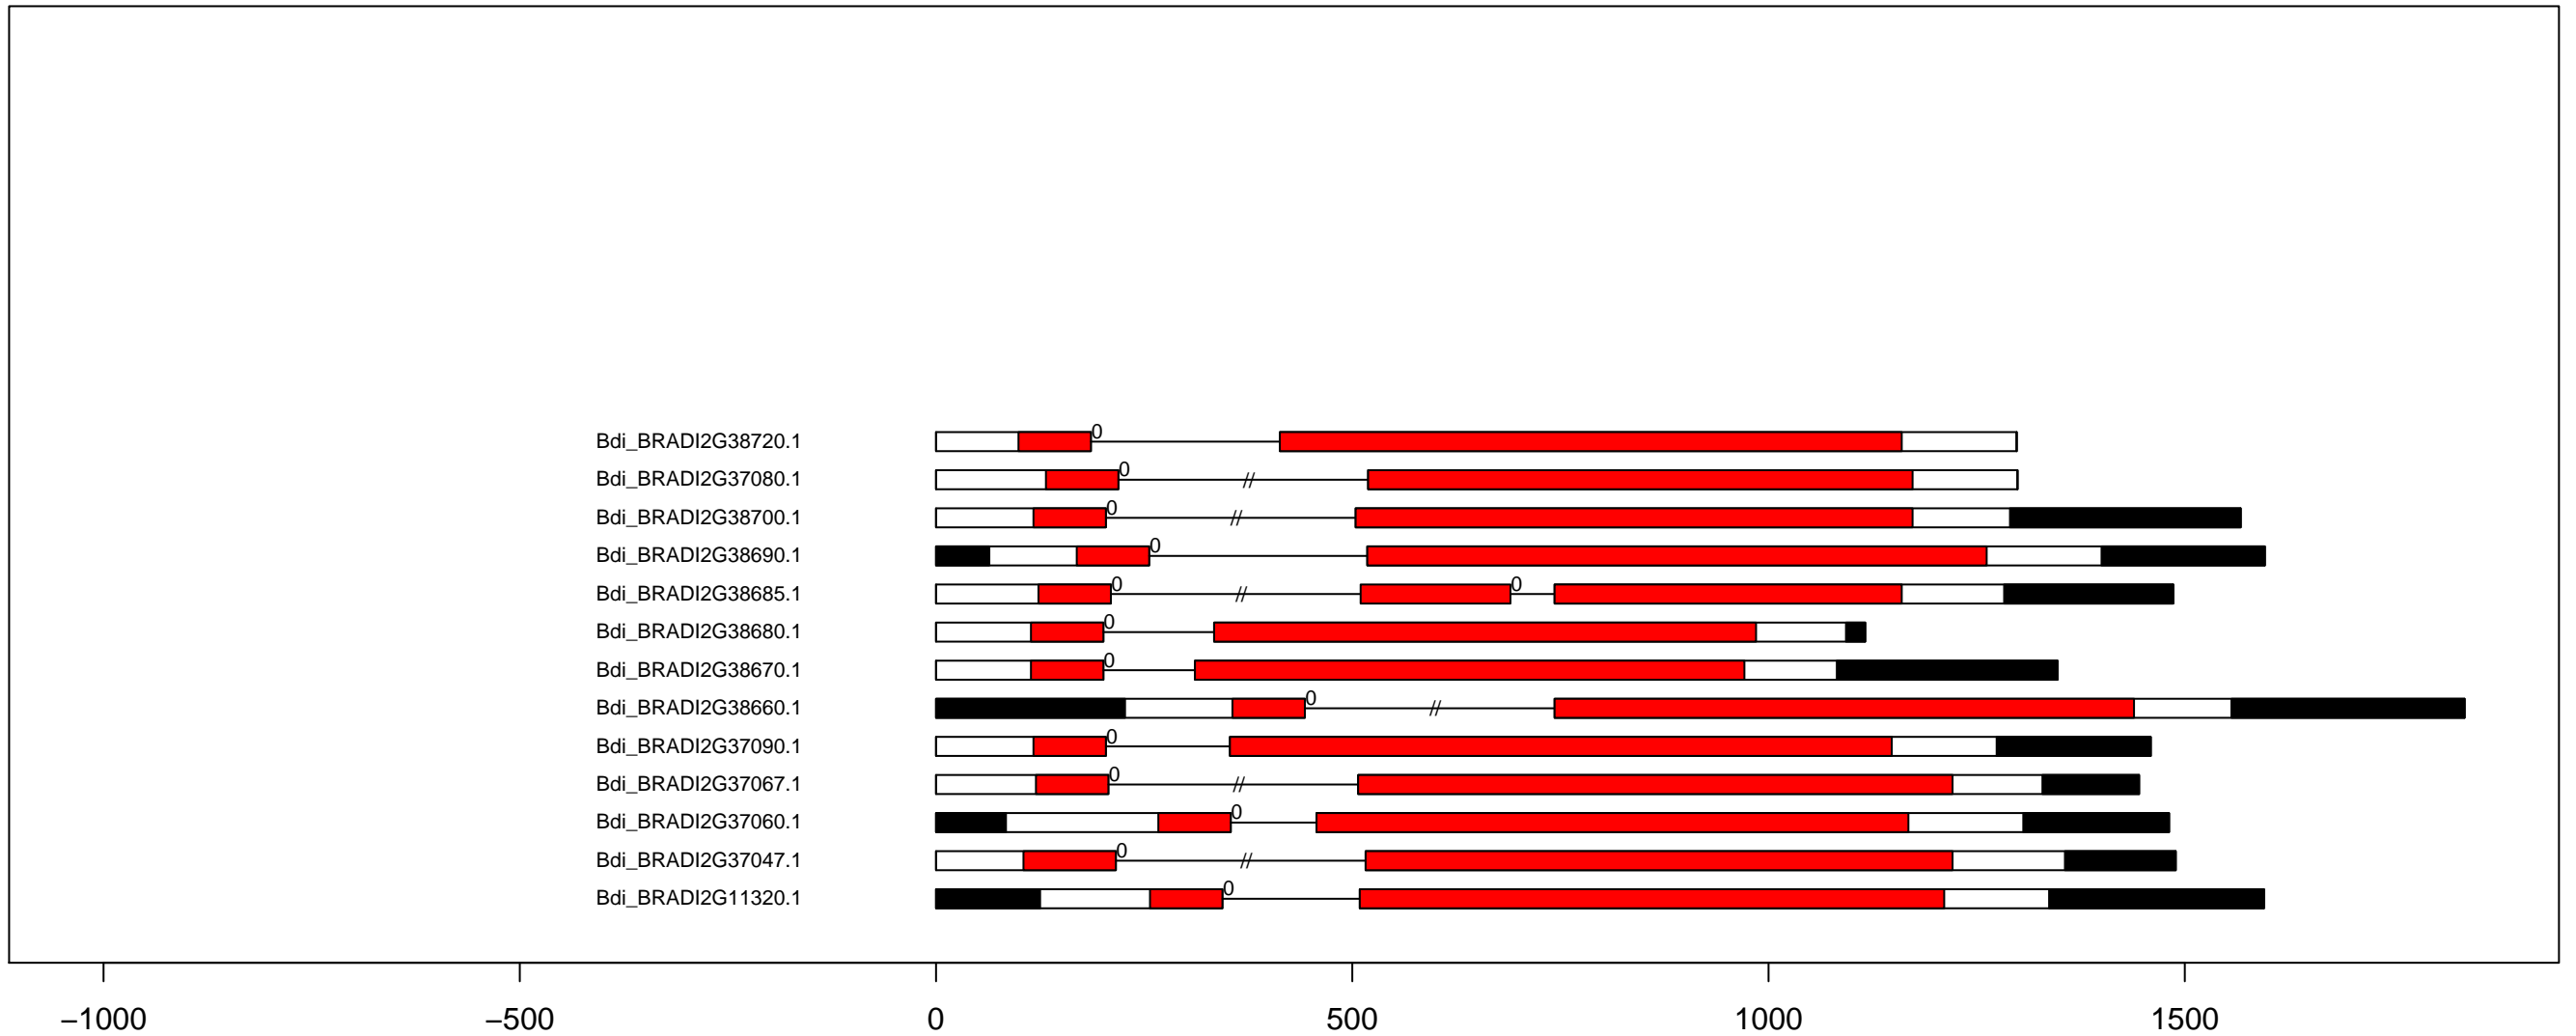

### B.di class III peroxidase V subfamily exon-intron and prx domain diagram (part 1)

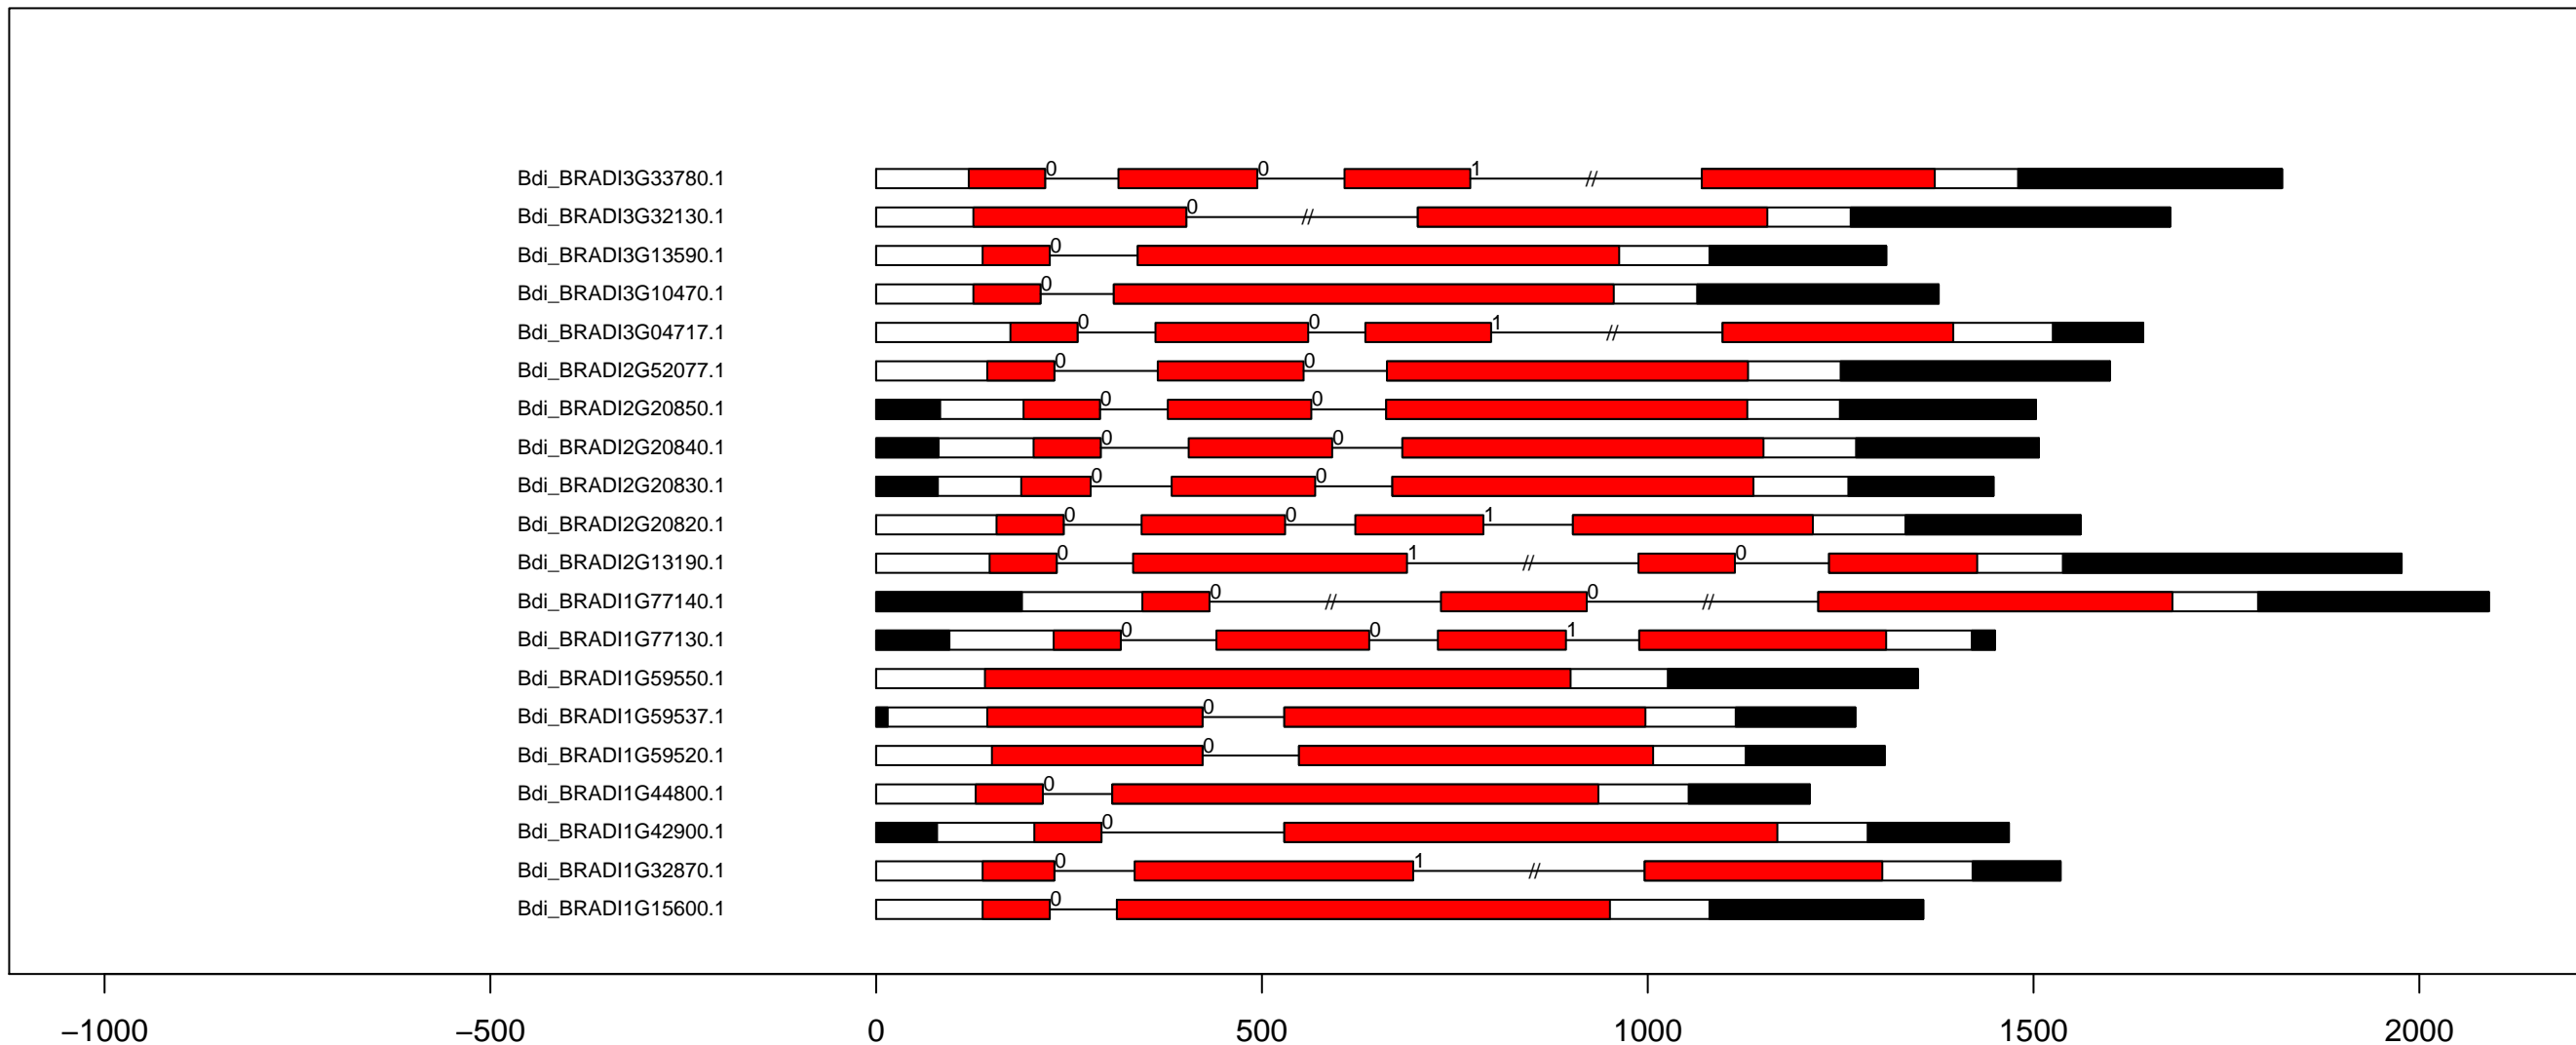





# B.di class III peroxidase VI subfamily exon-intron and prx domain diagram (all)

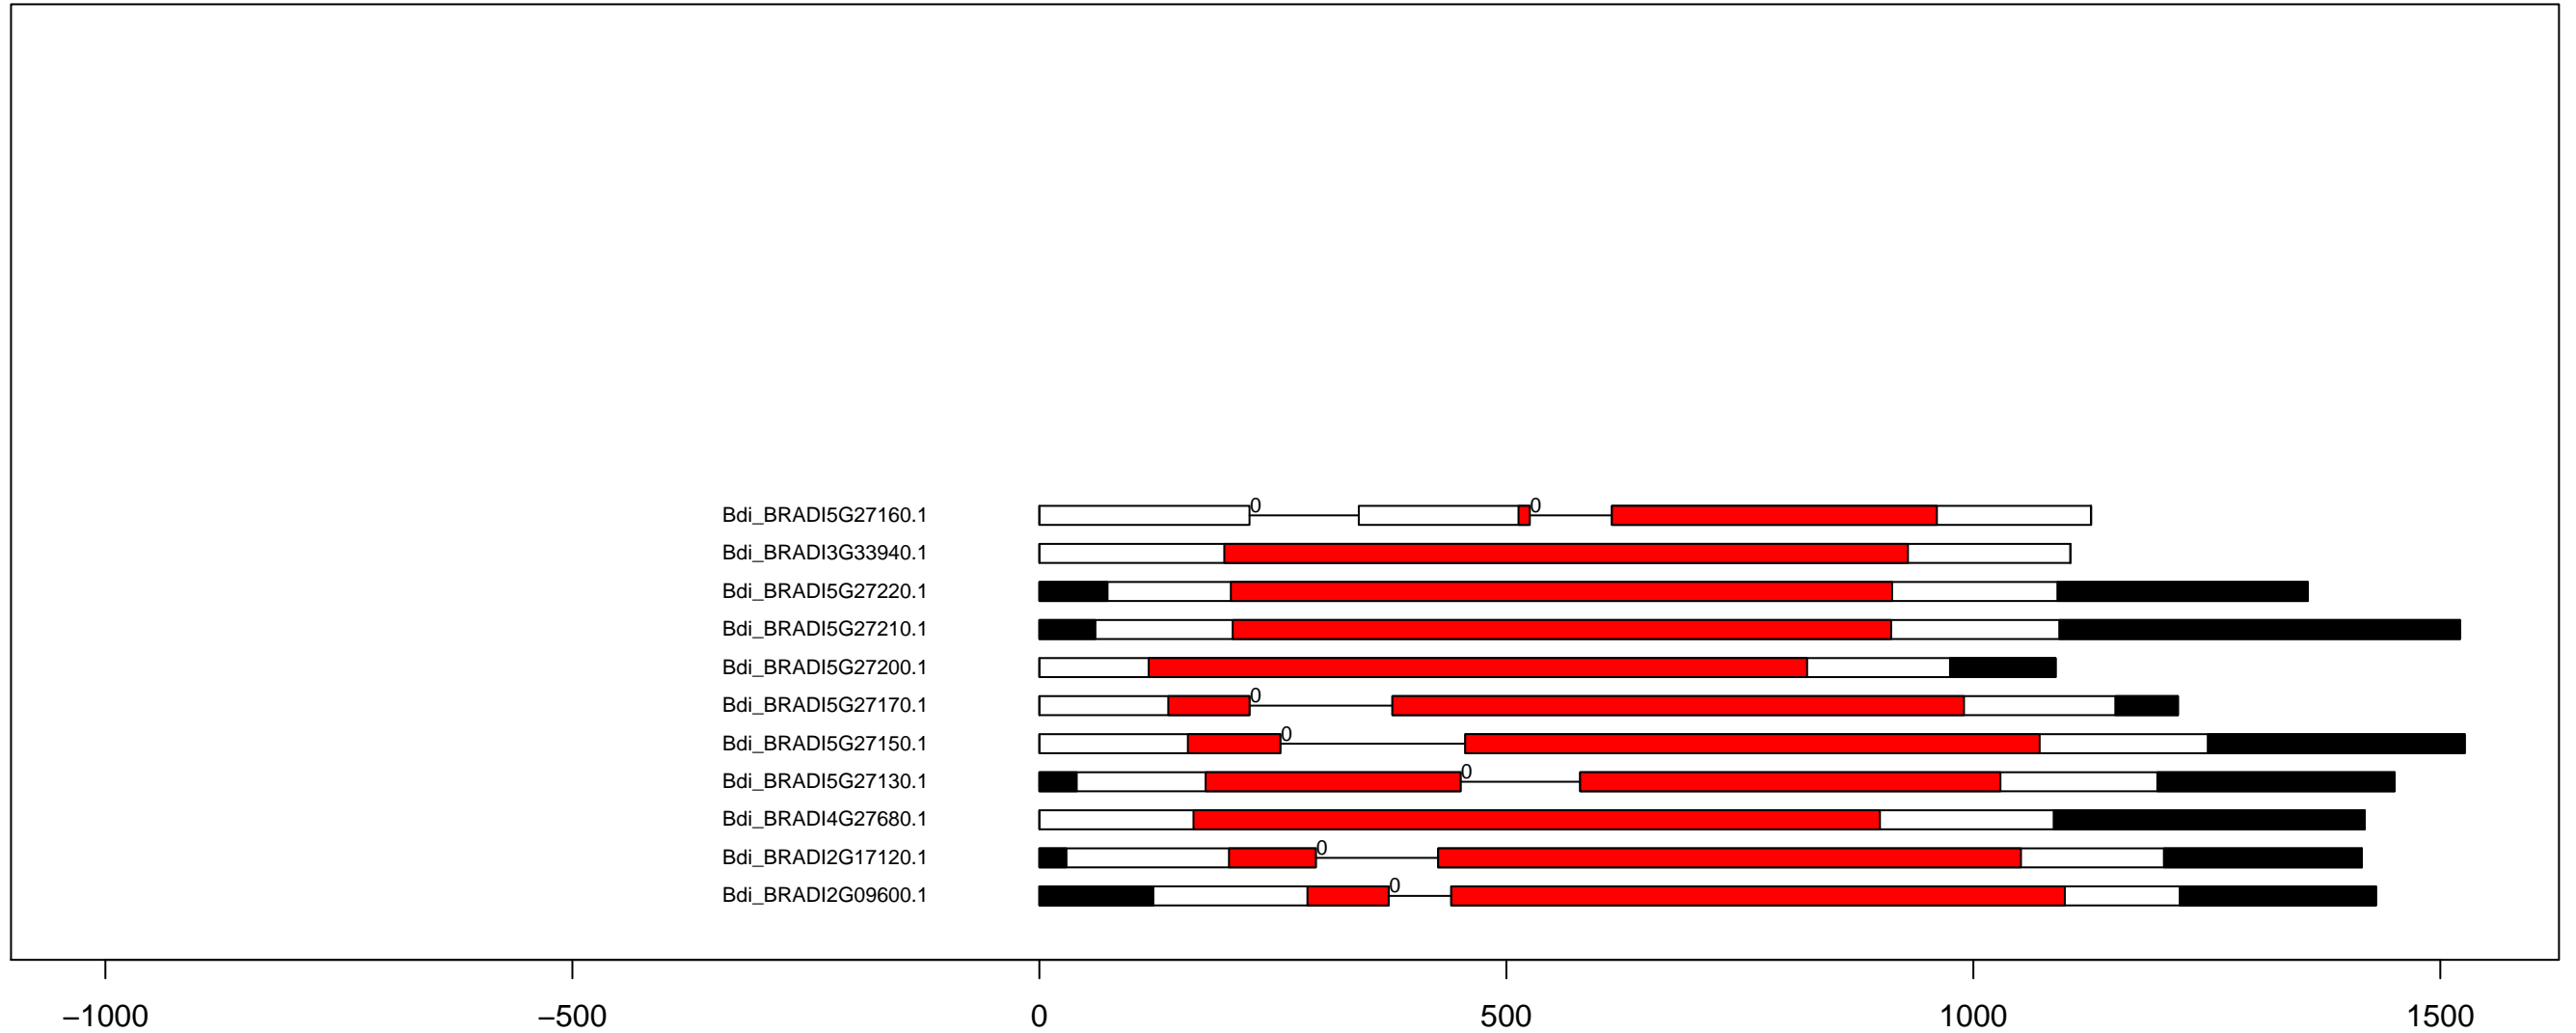



### B.di class III peroxidase IX subfamily exon-intron and prx domain diagram (all)

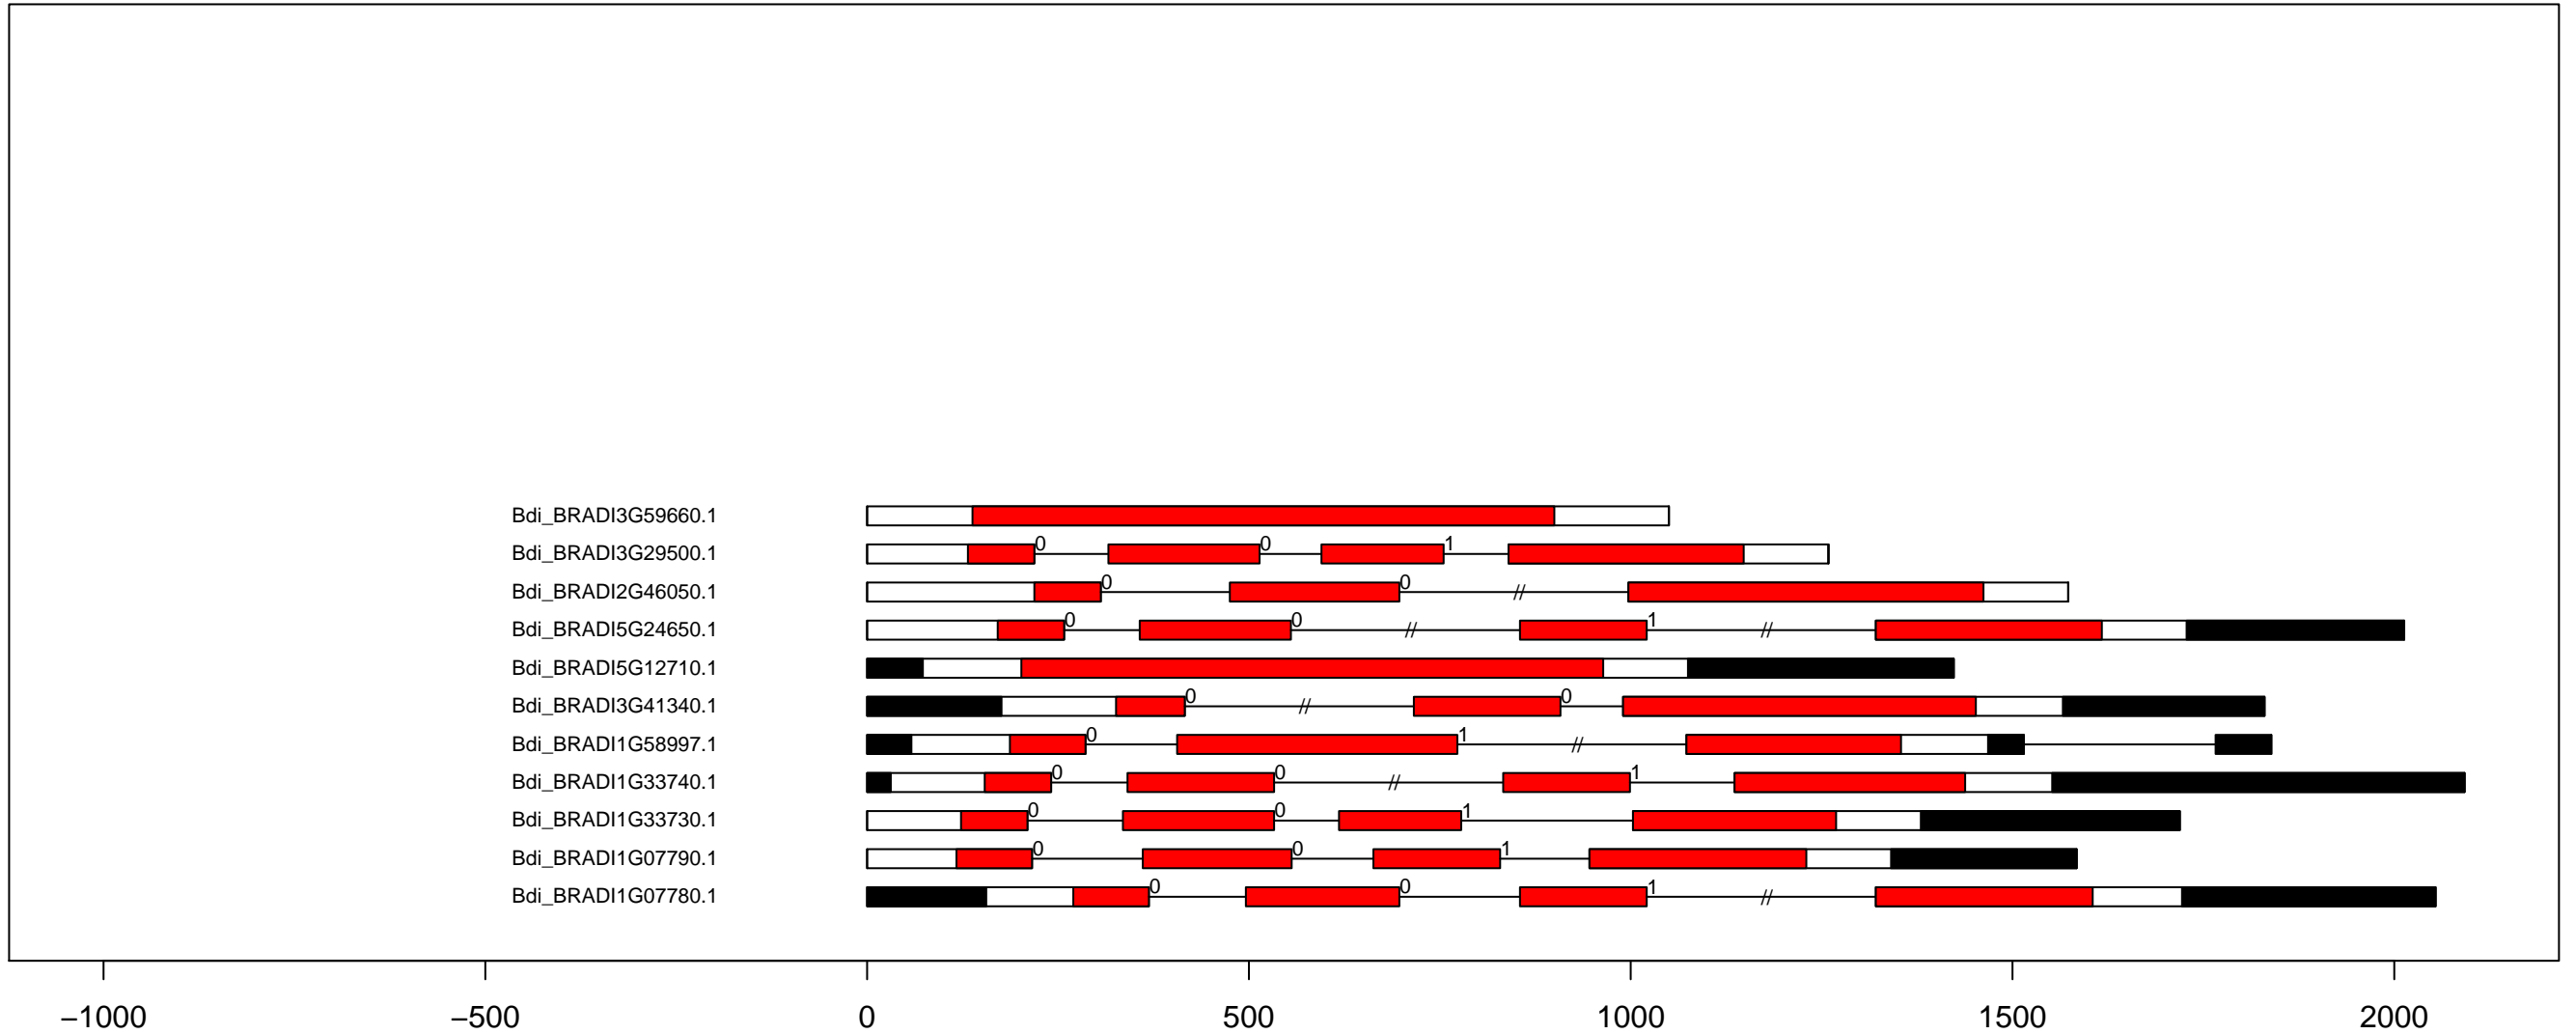

# B.di class III peroxidase X subfamily exon-intron and prx domain diagram (all)

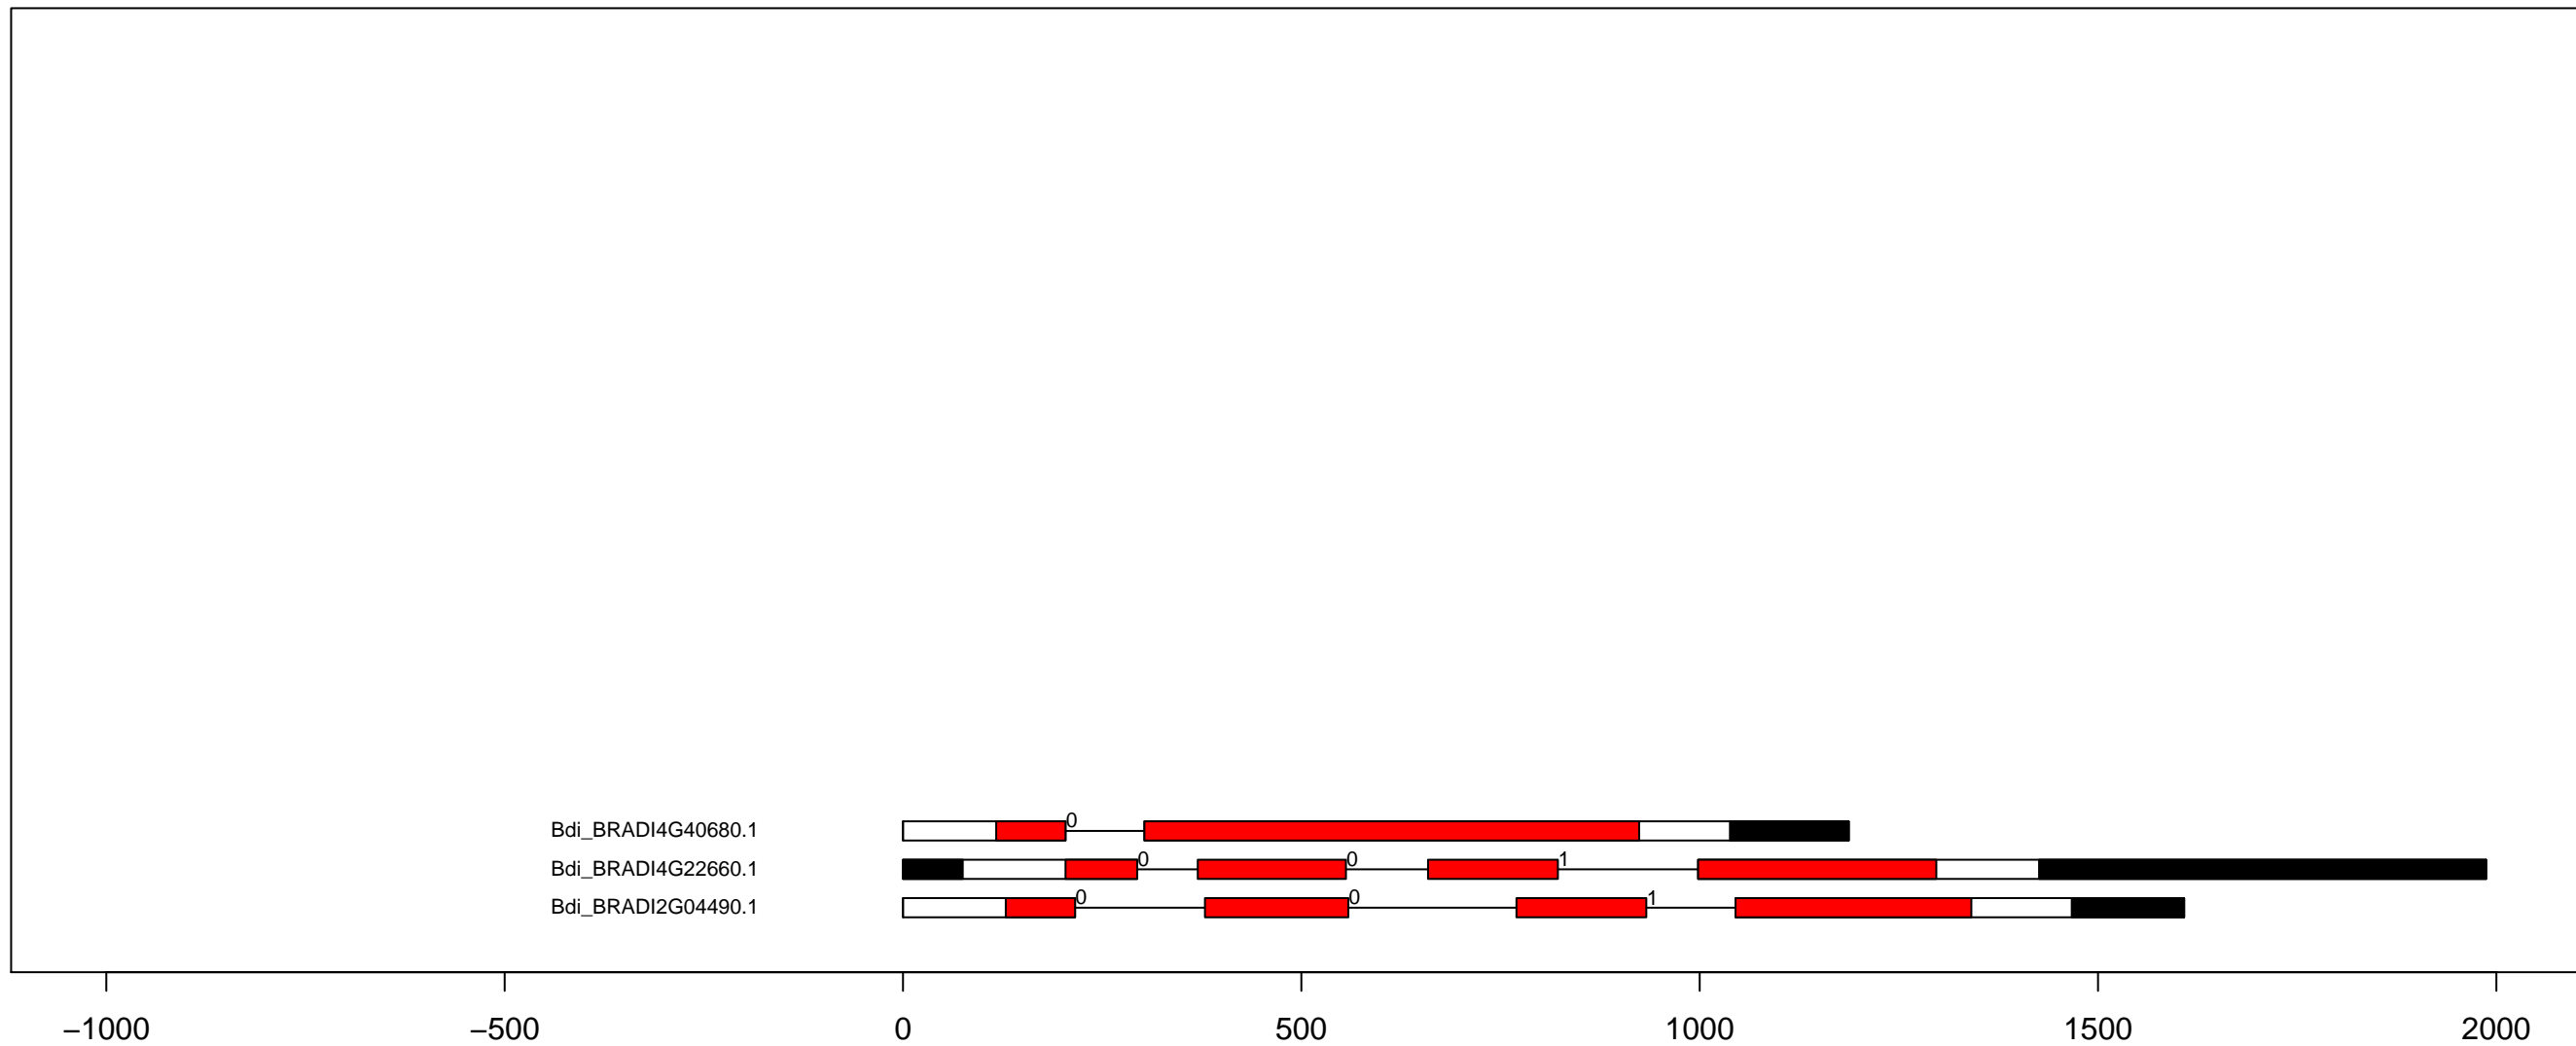

# B.di class III peroxidase XII subfamily exon-intron and prx domain diagram (all)

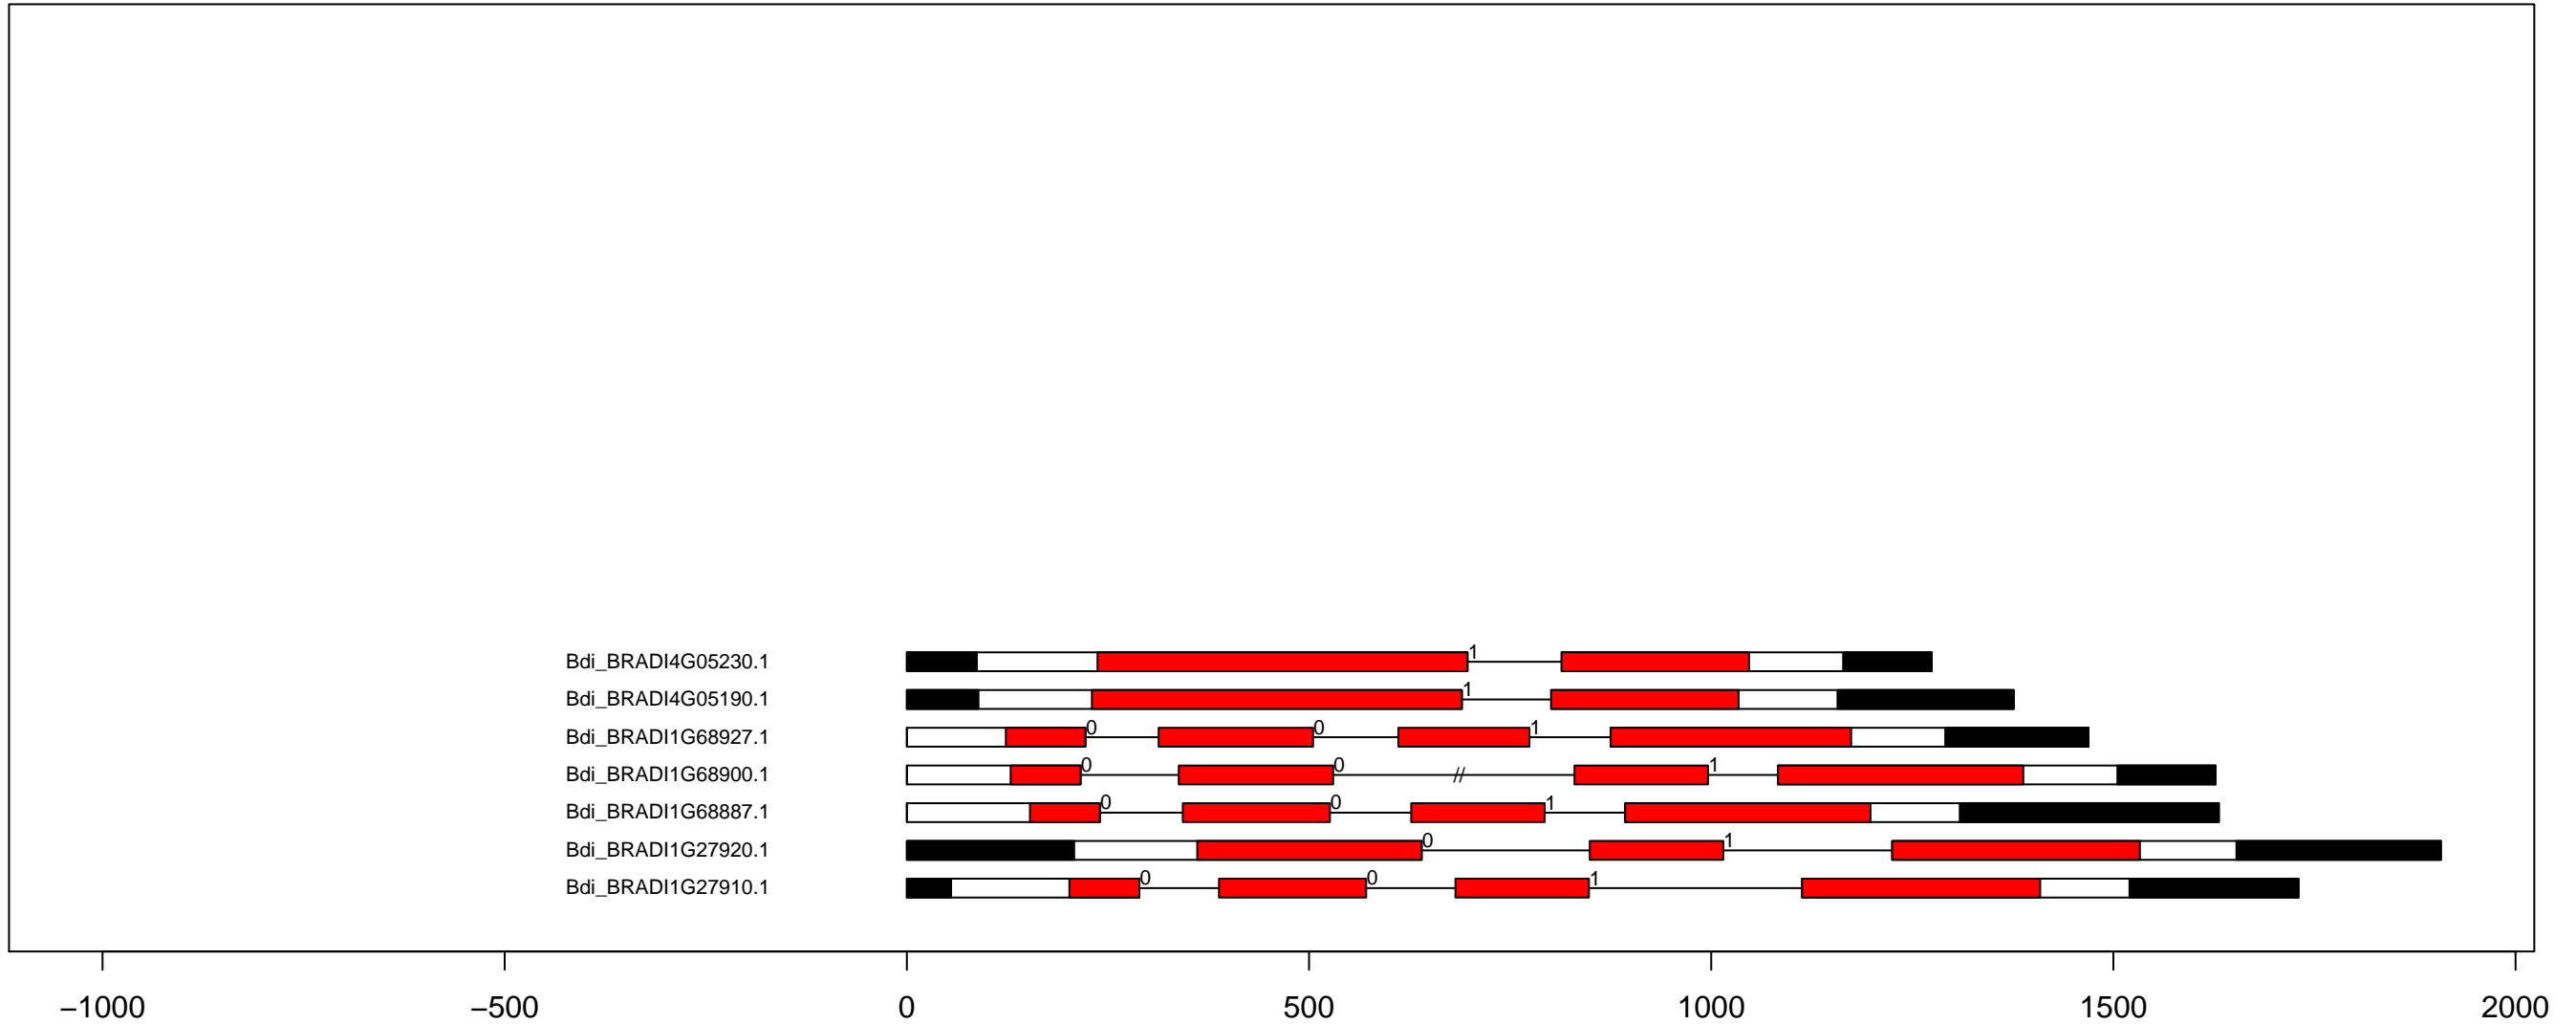

### B.di class III peroxidase XIV subfamily exon-intron and prx domain diagram (all)

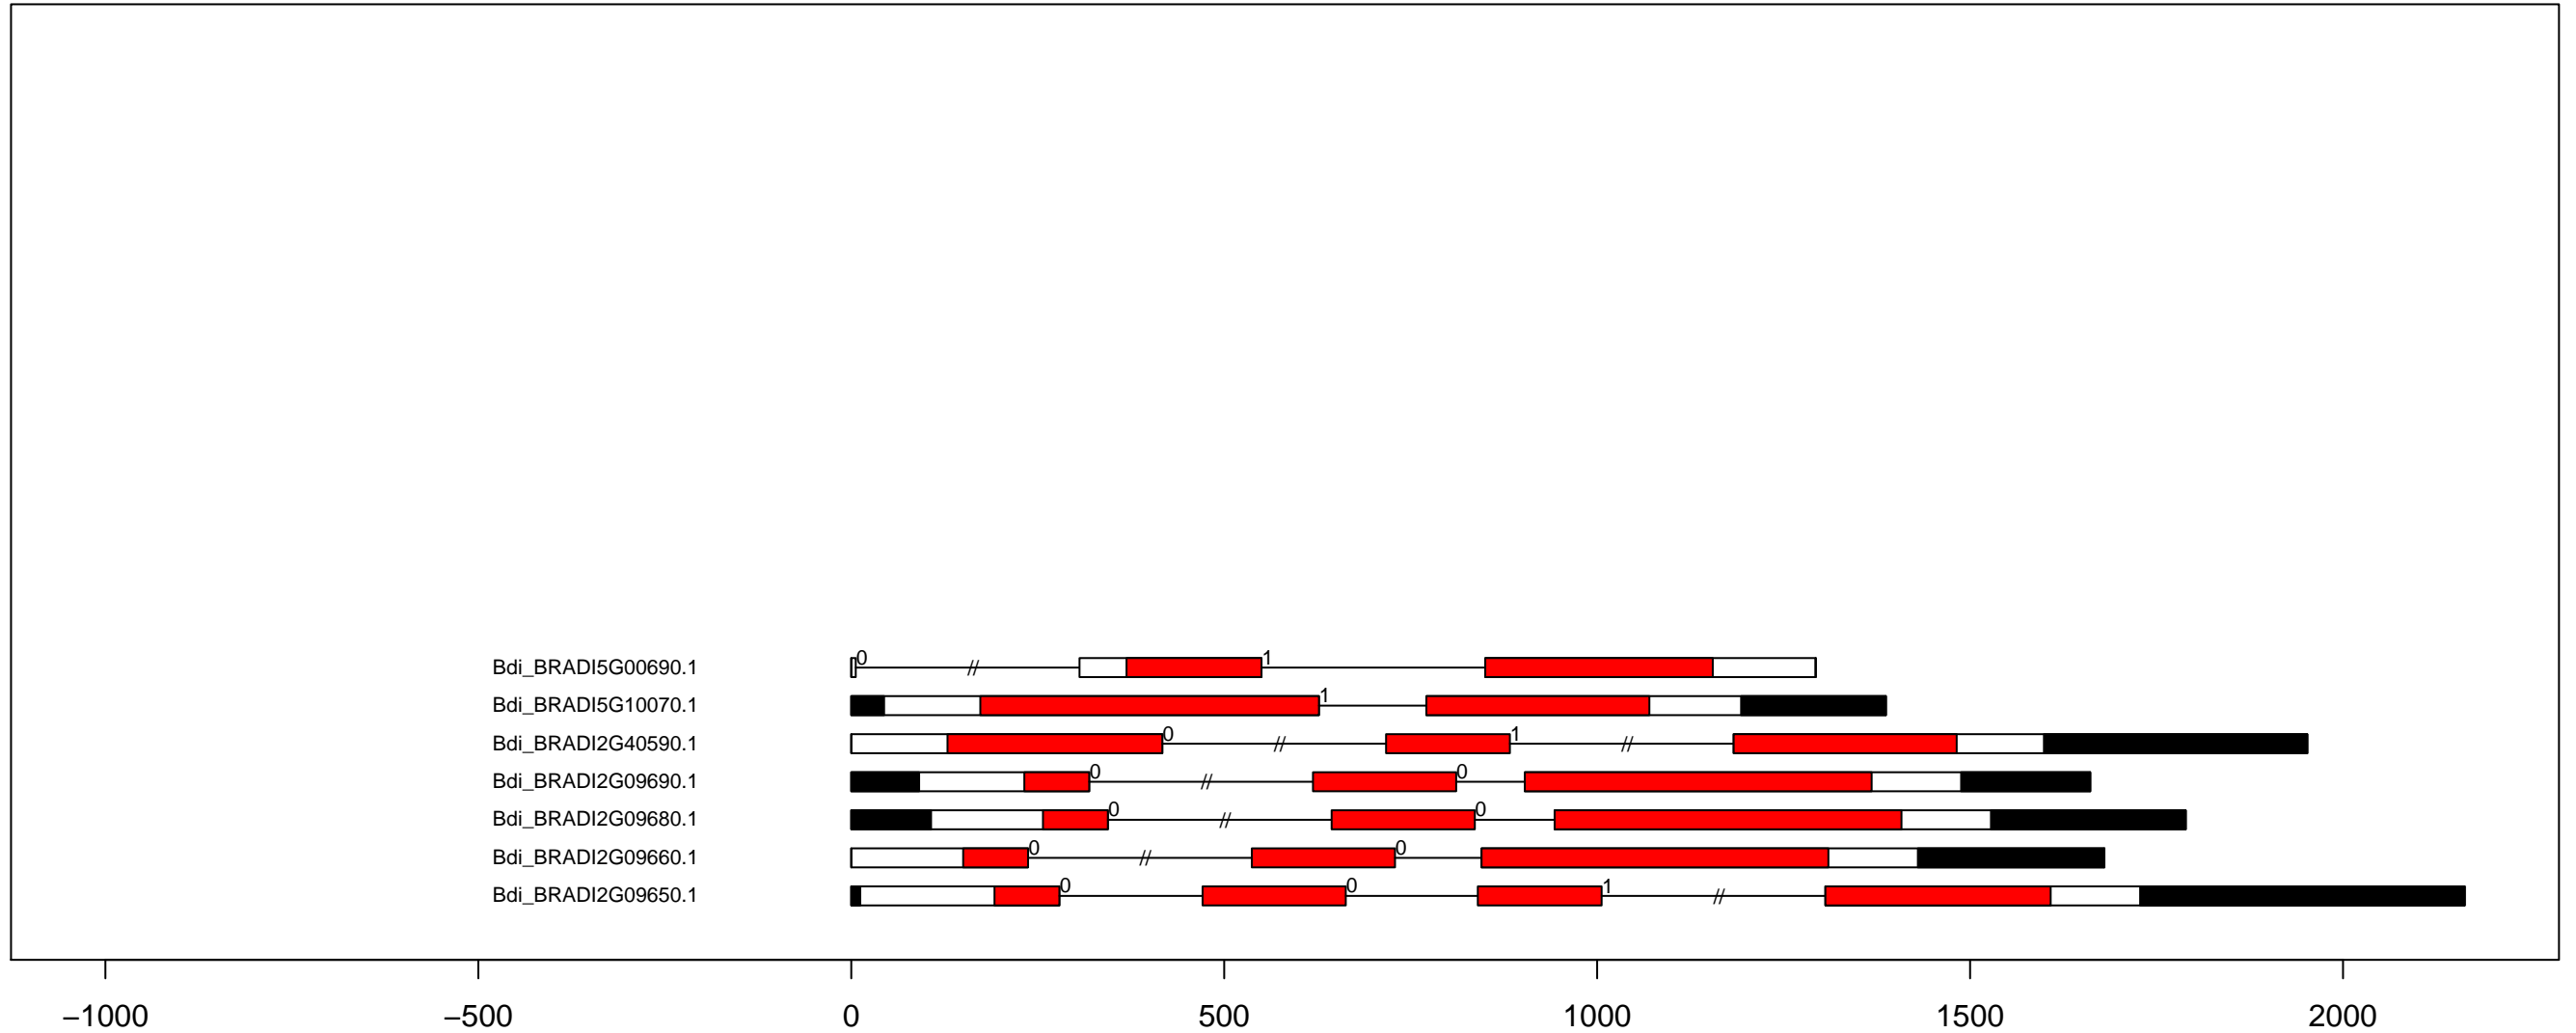

# B.di class III peroxidase XV subfamily exon-intron and prx domain diagram (all)

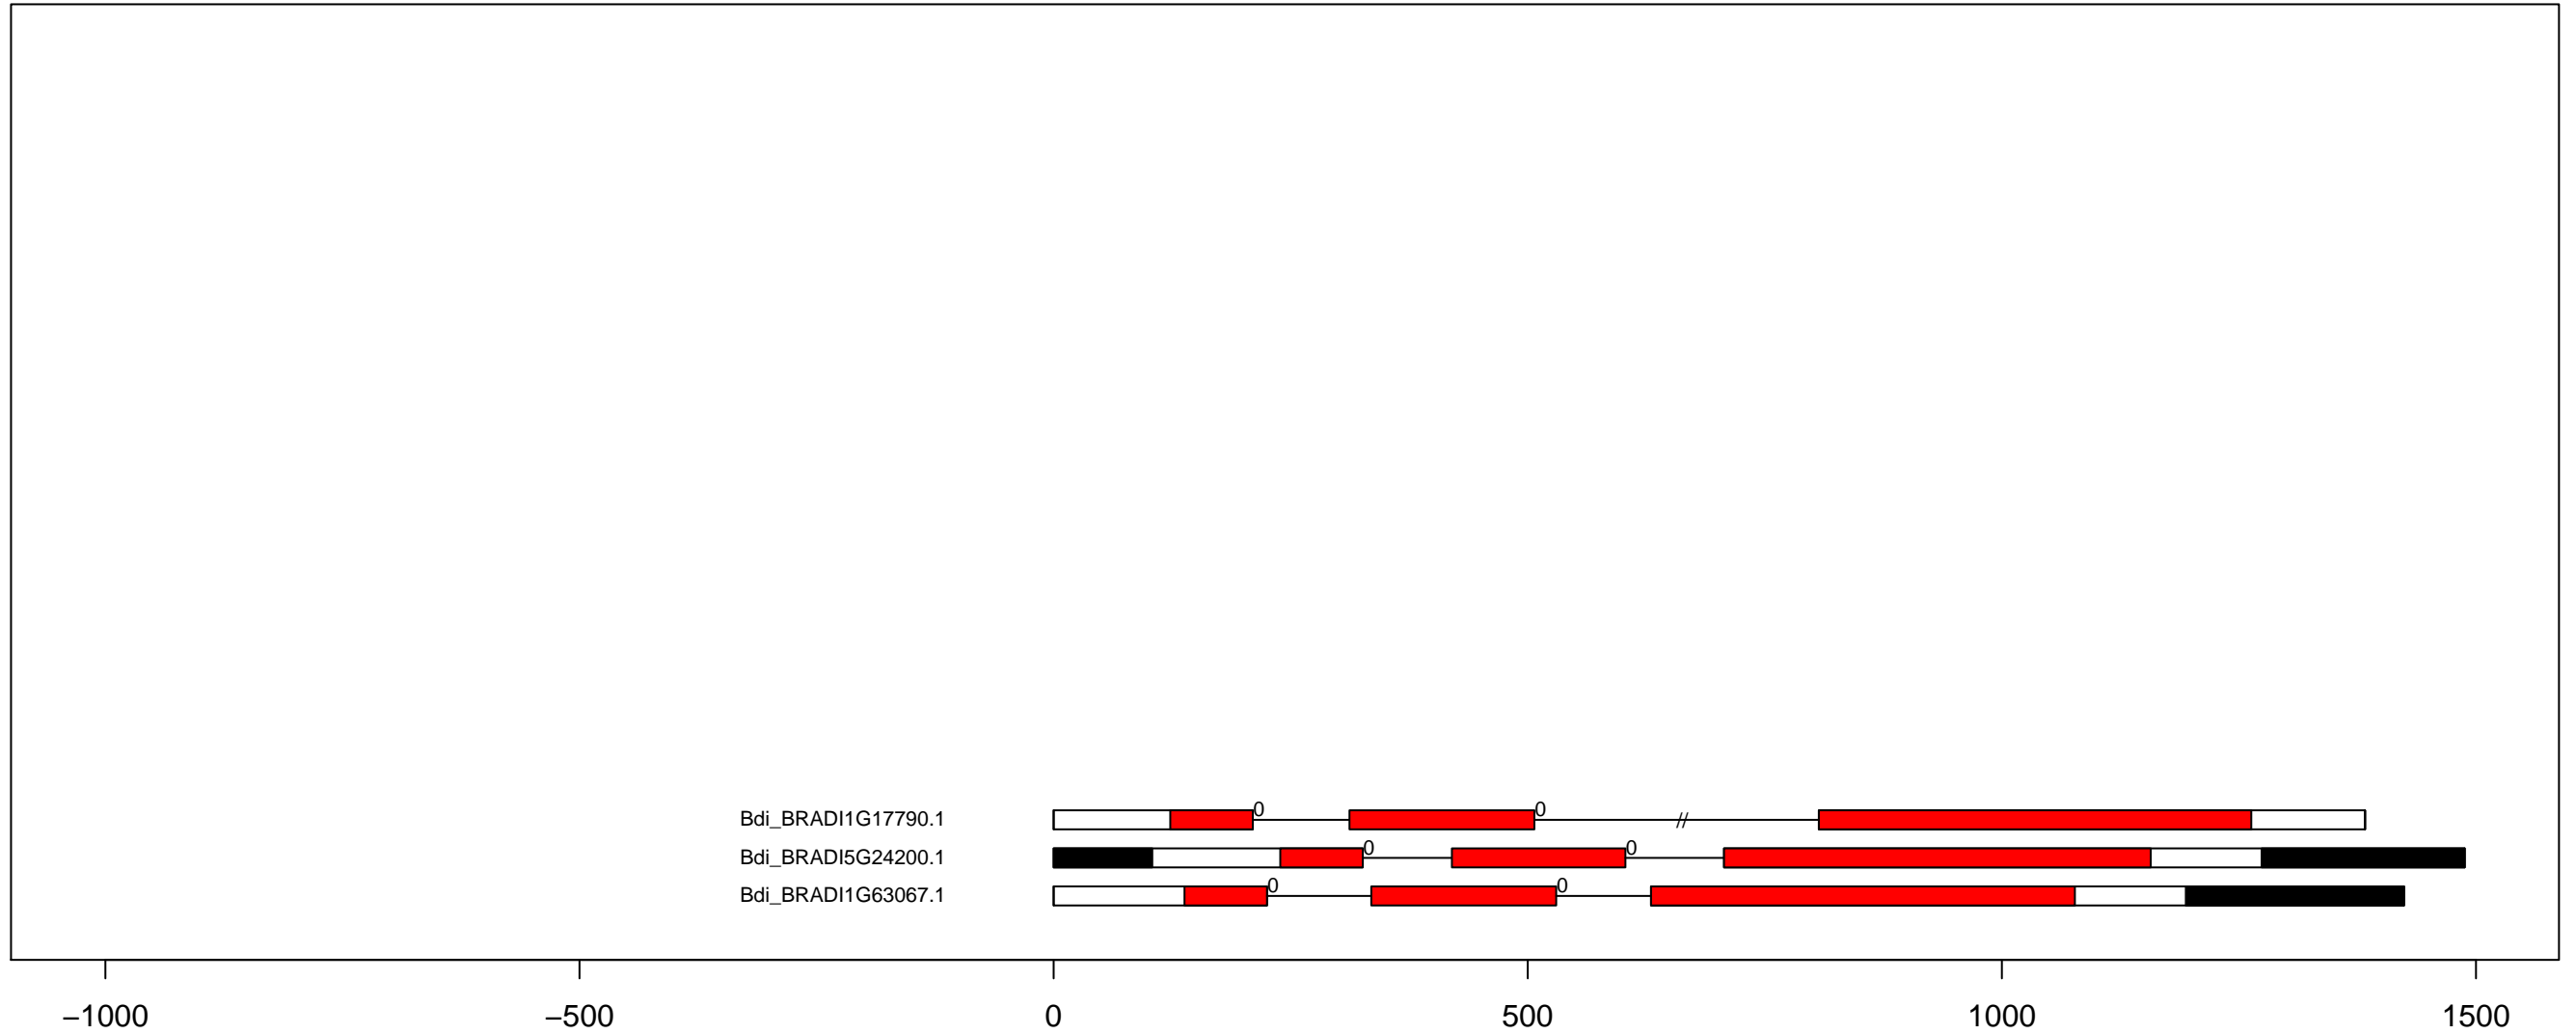



### B.di class III peroxidase XVI subfamily exon-intron and prx domain diagram (all)

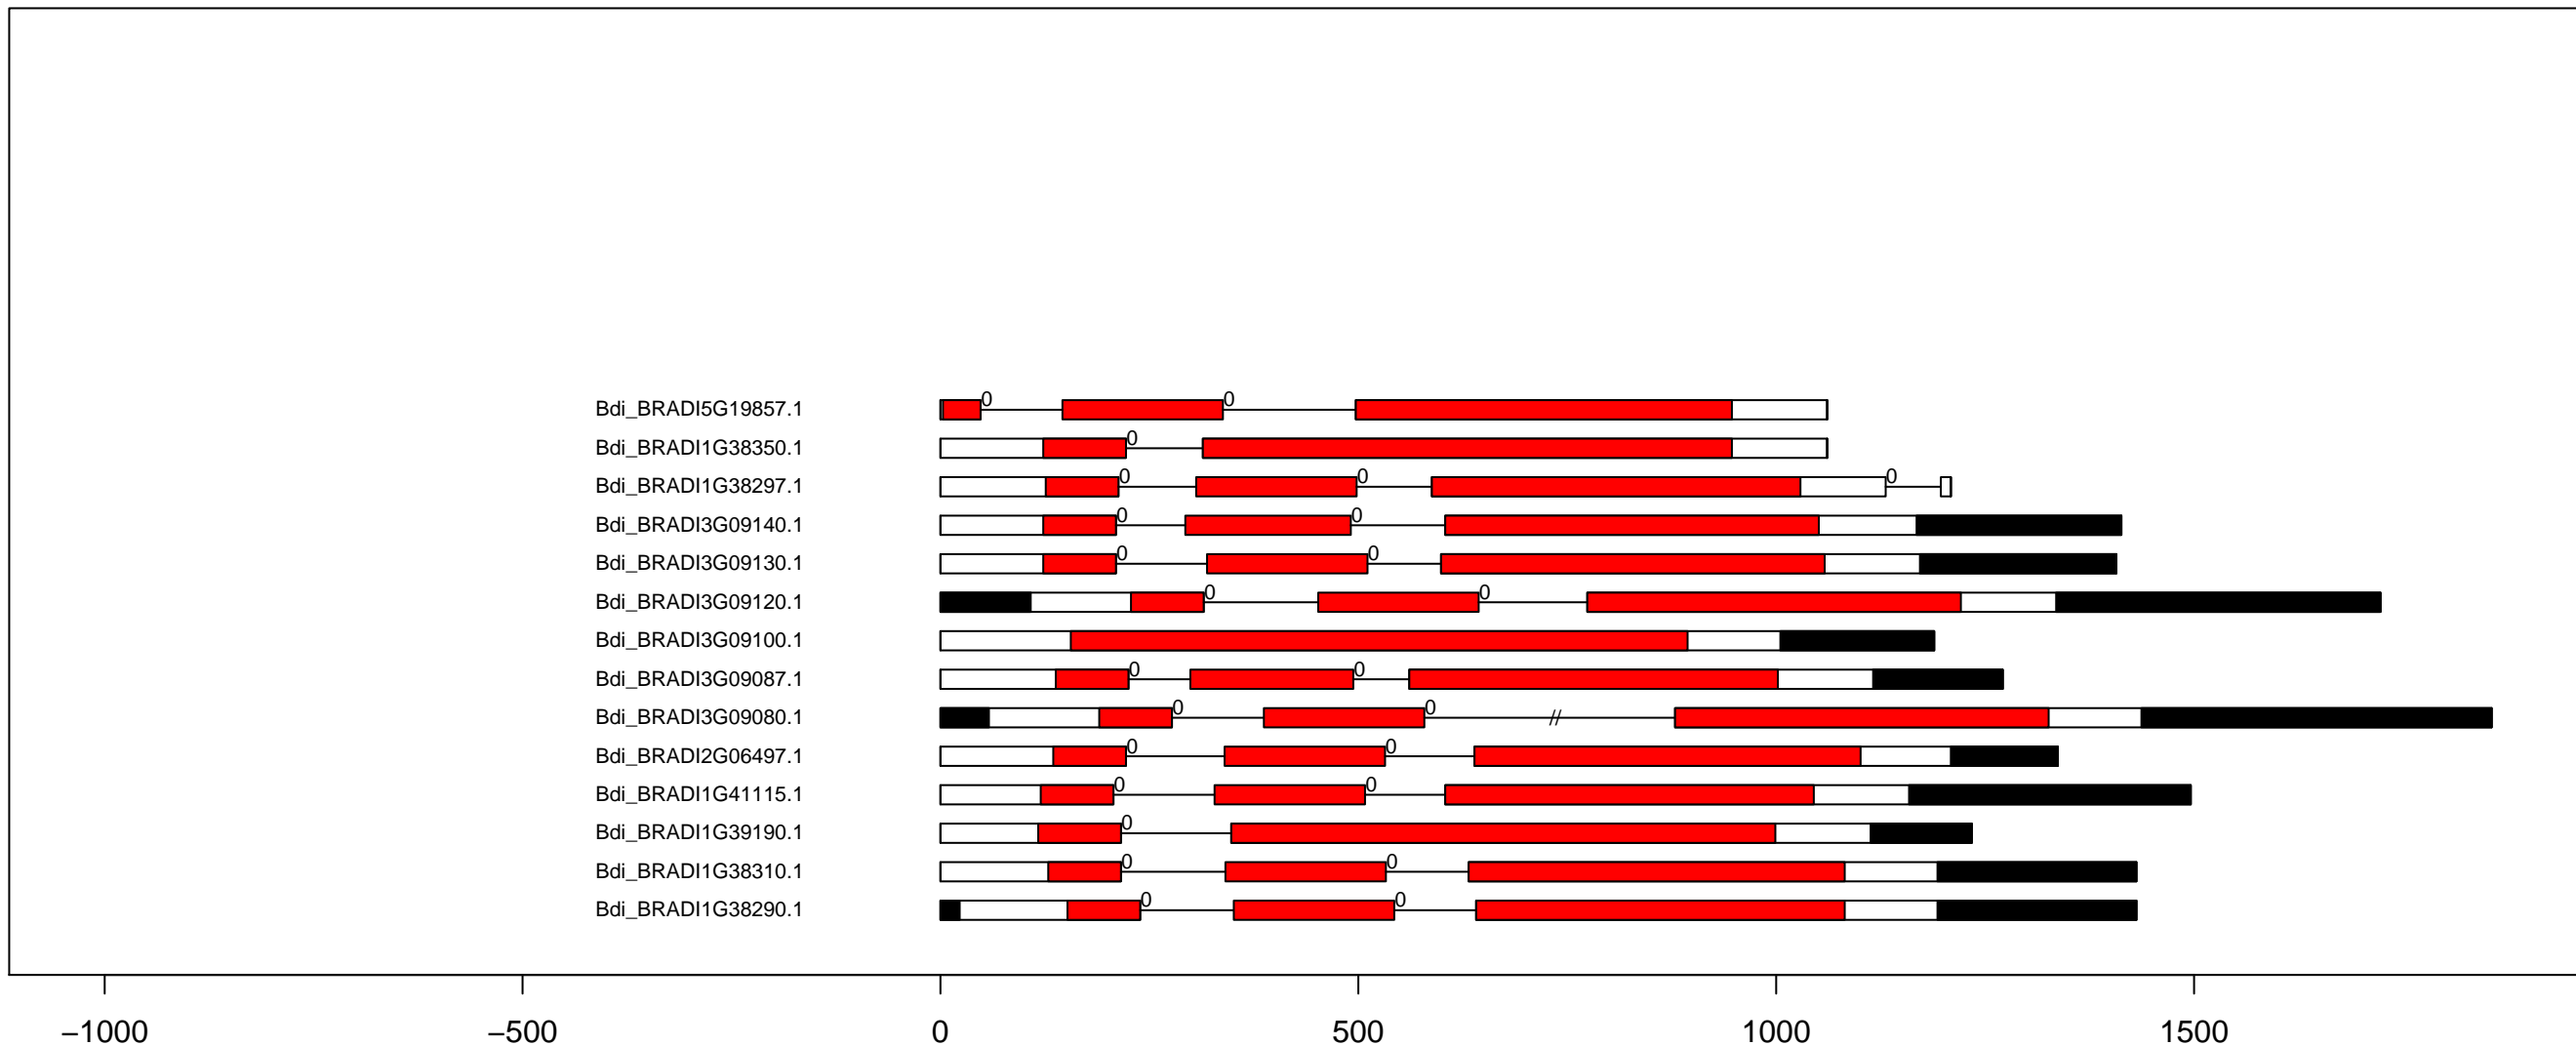

### B.di class III peroxidase XVII subfamily exon-intron and prx domain diagram (all)

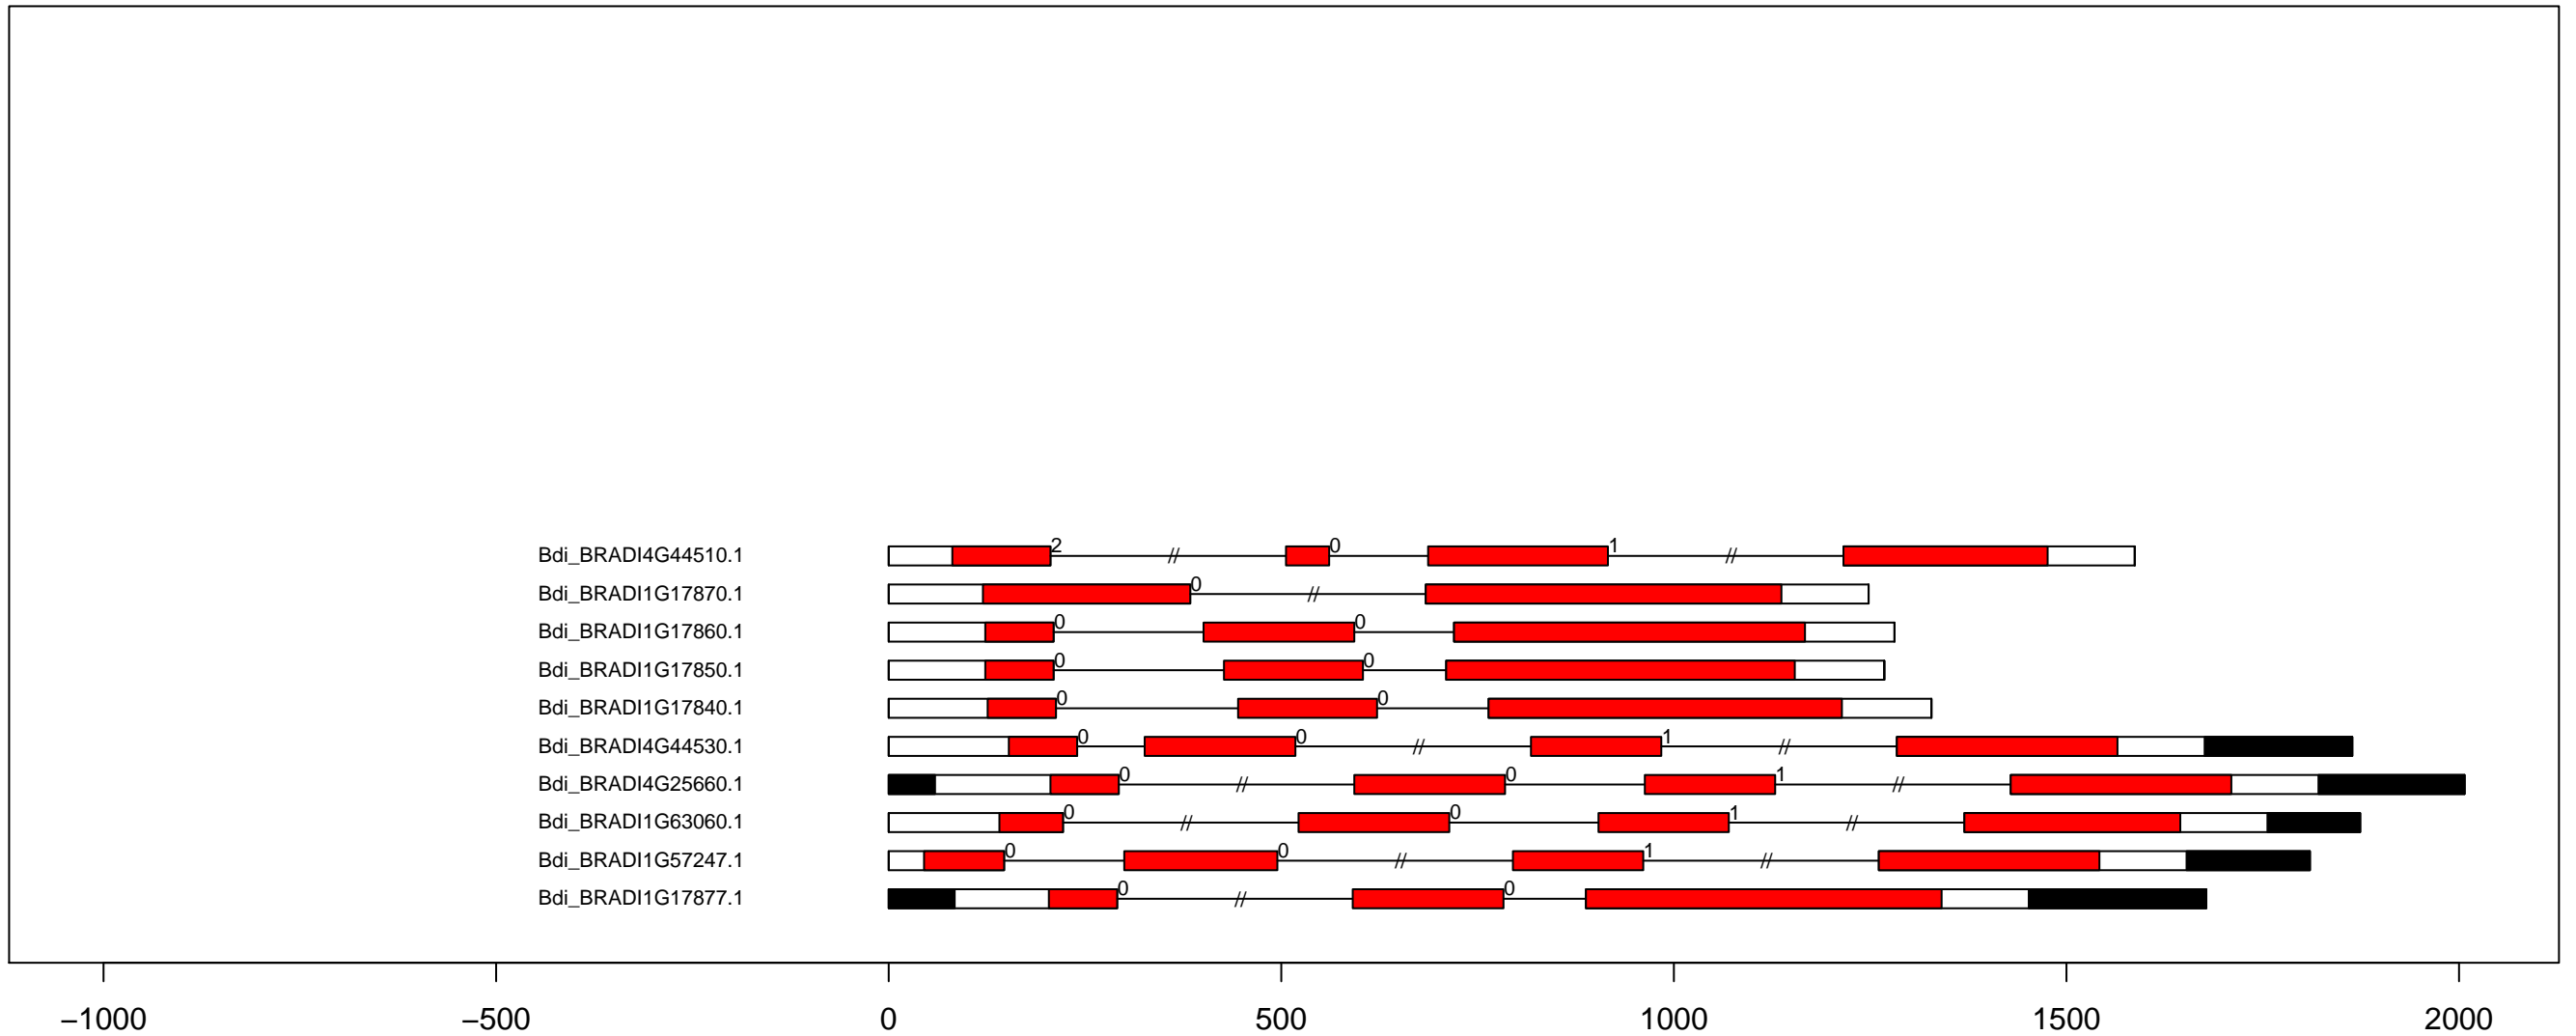

# B.di class III peroxidase XVIII subfamily exon-intron and prx domain diagram (all)

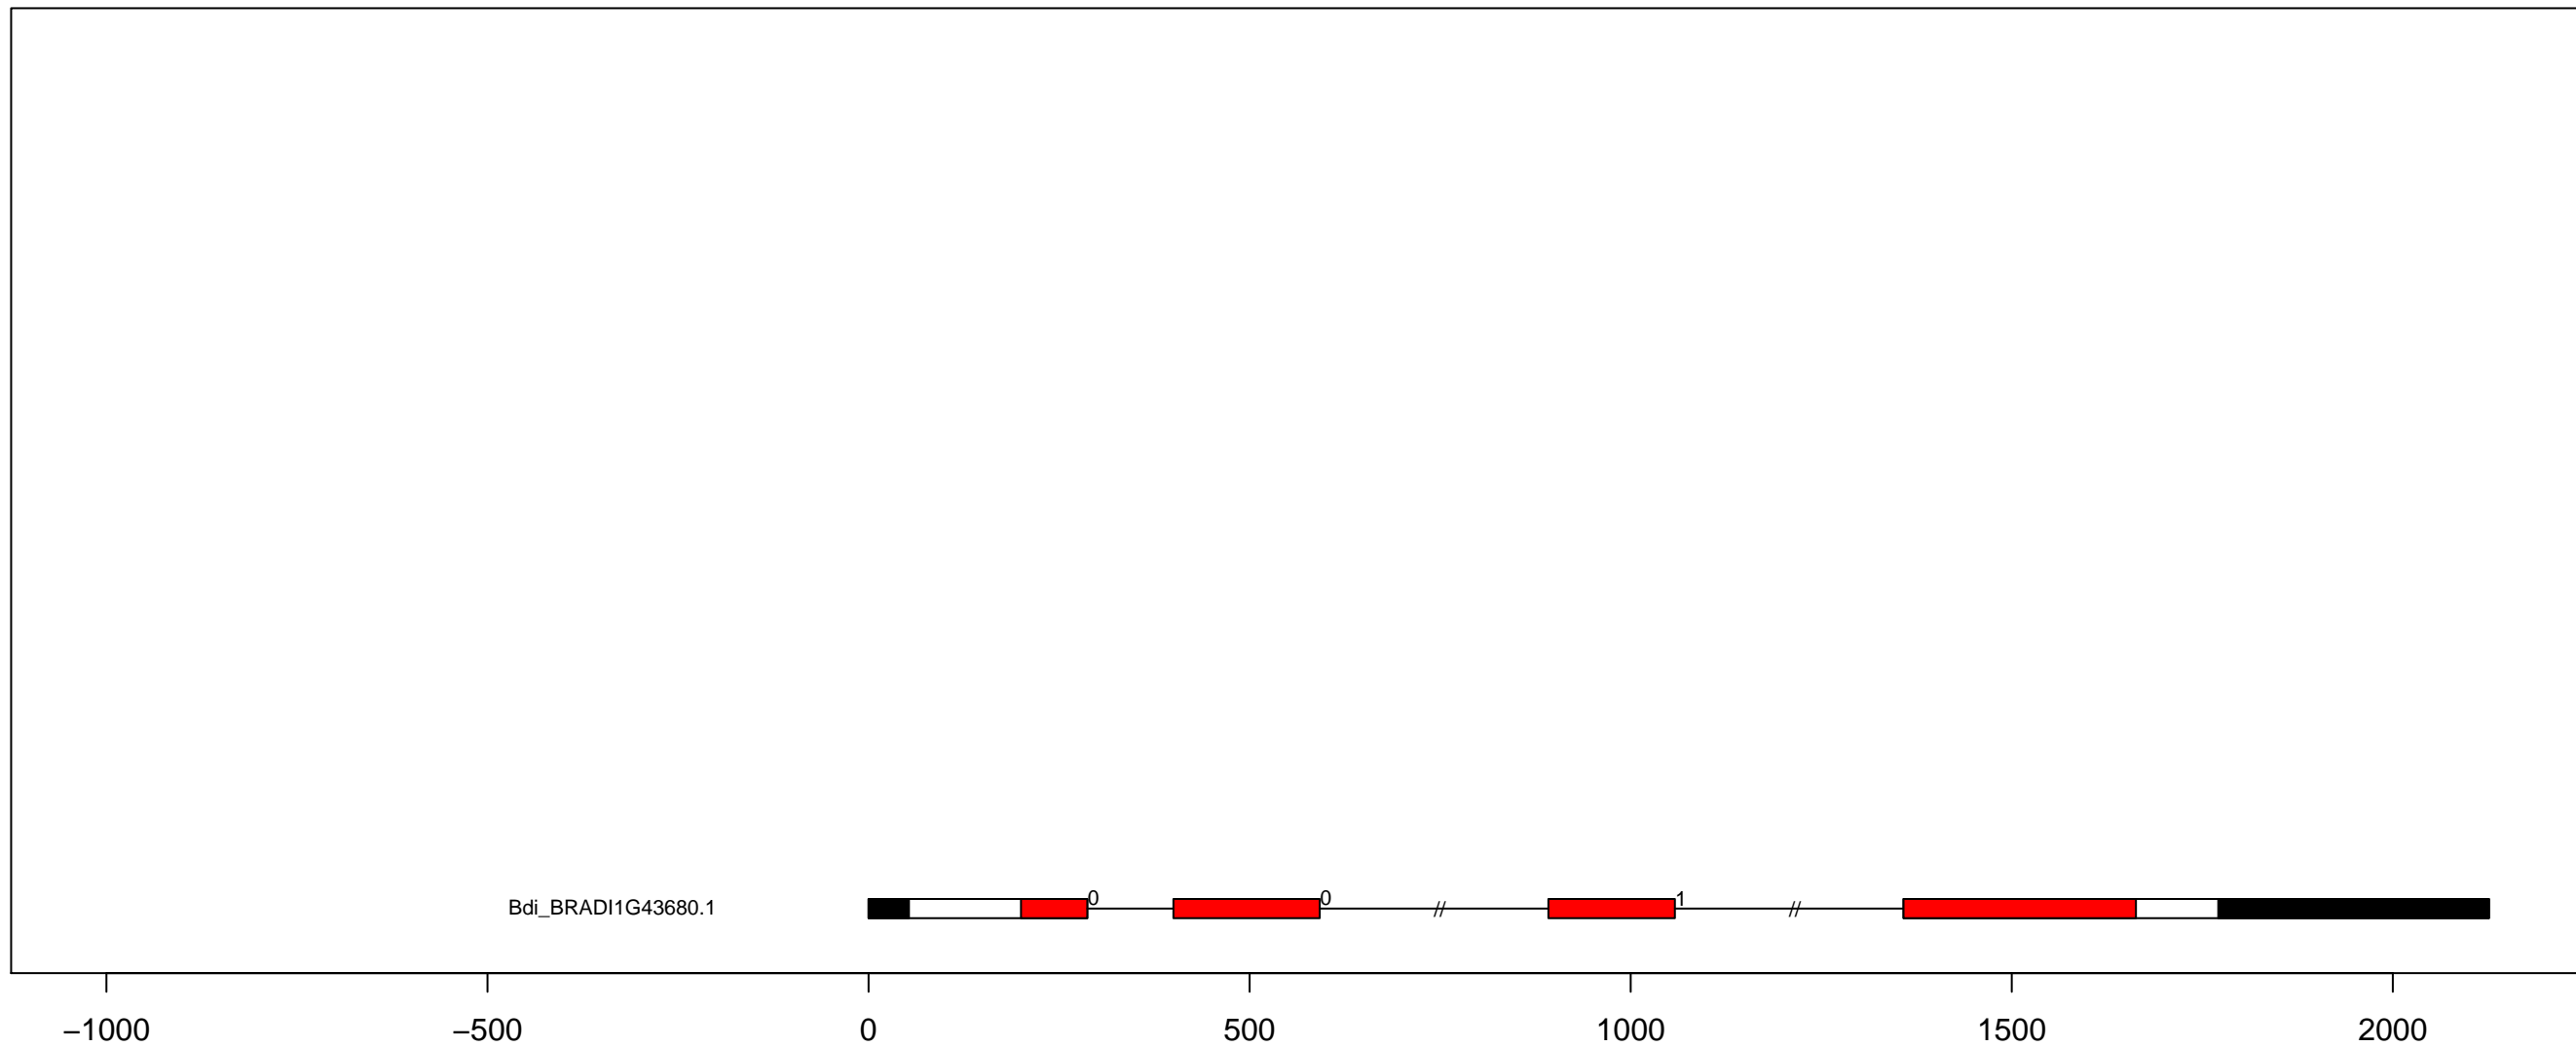

# B.di class III peroxidase unclar\_classification subfamily exon-intron and prx domain diagram (all)

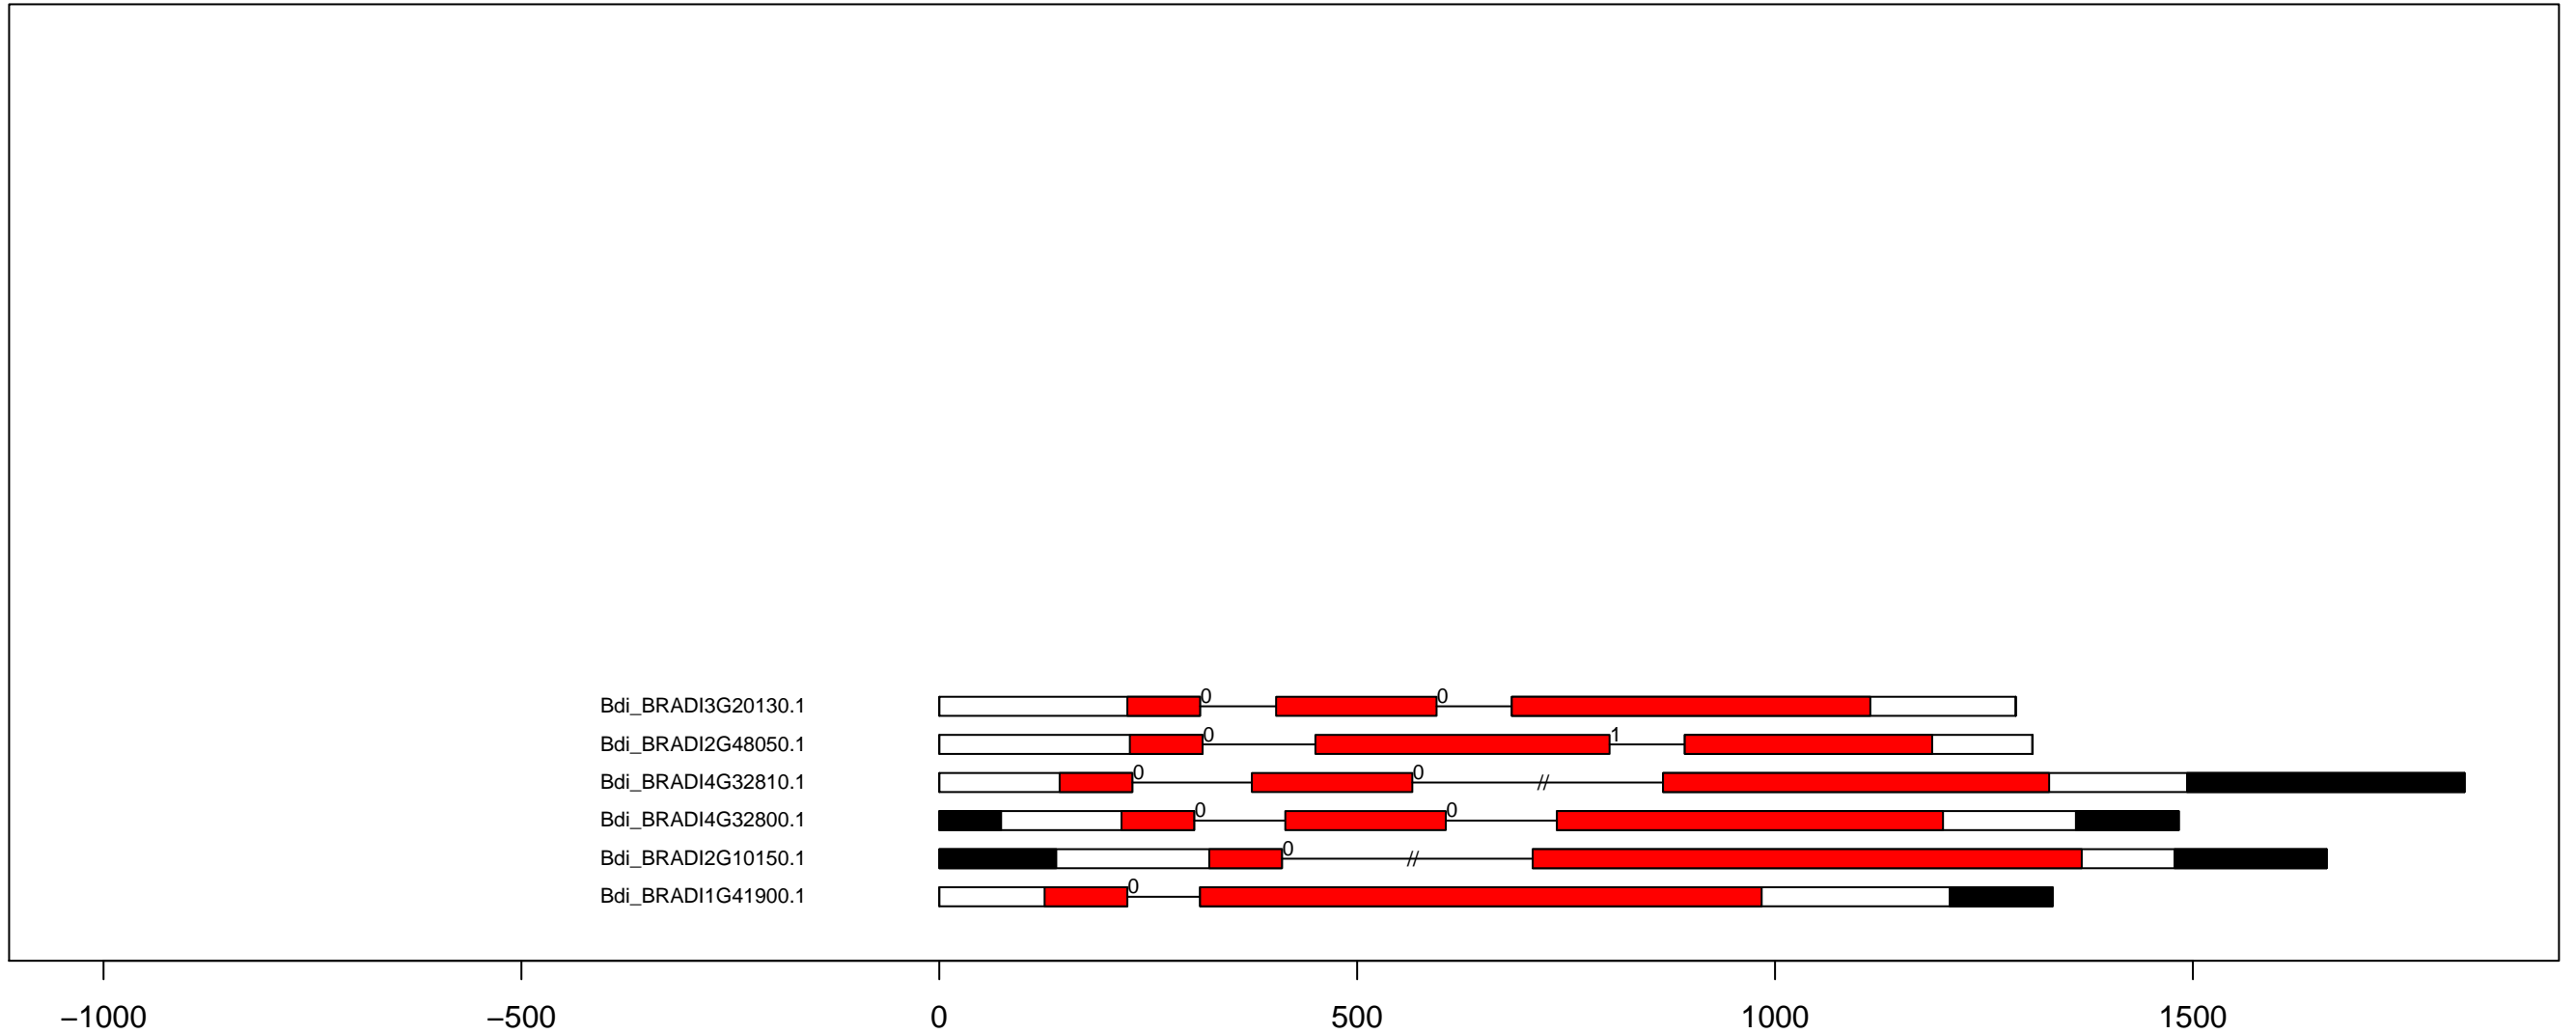

### O.sa class III peroxidase I subfamily exon-intron and prx domain diagram (part 1)

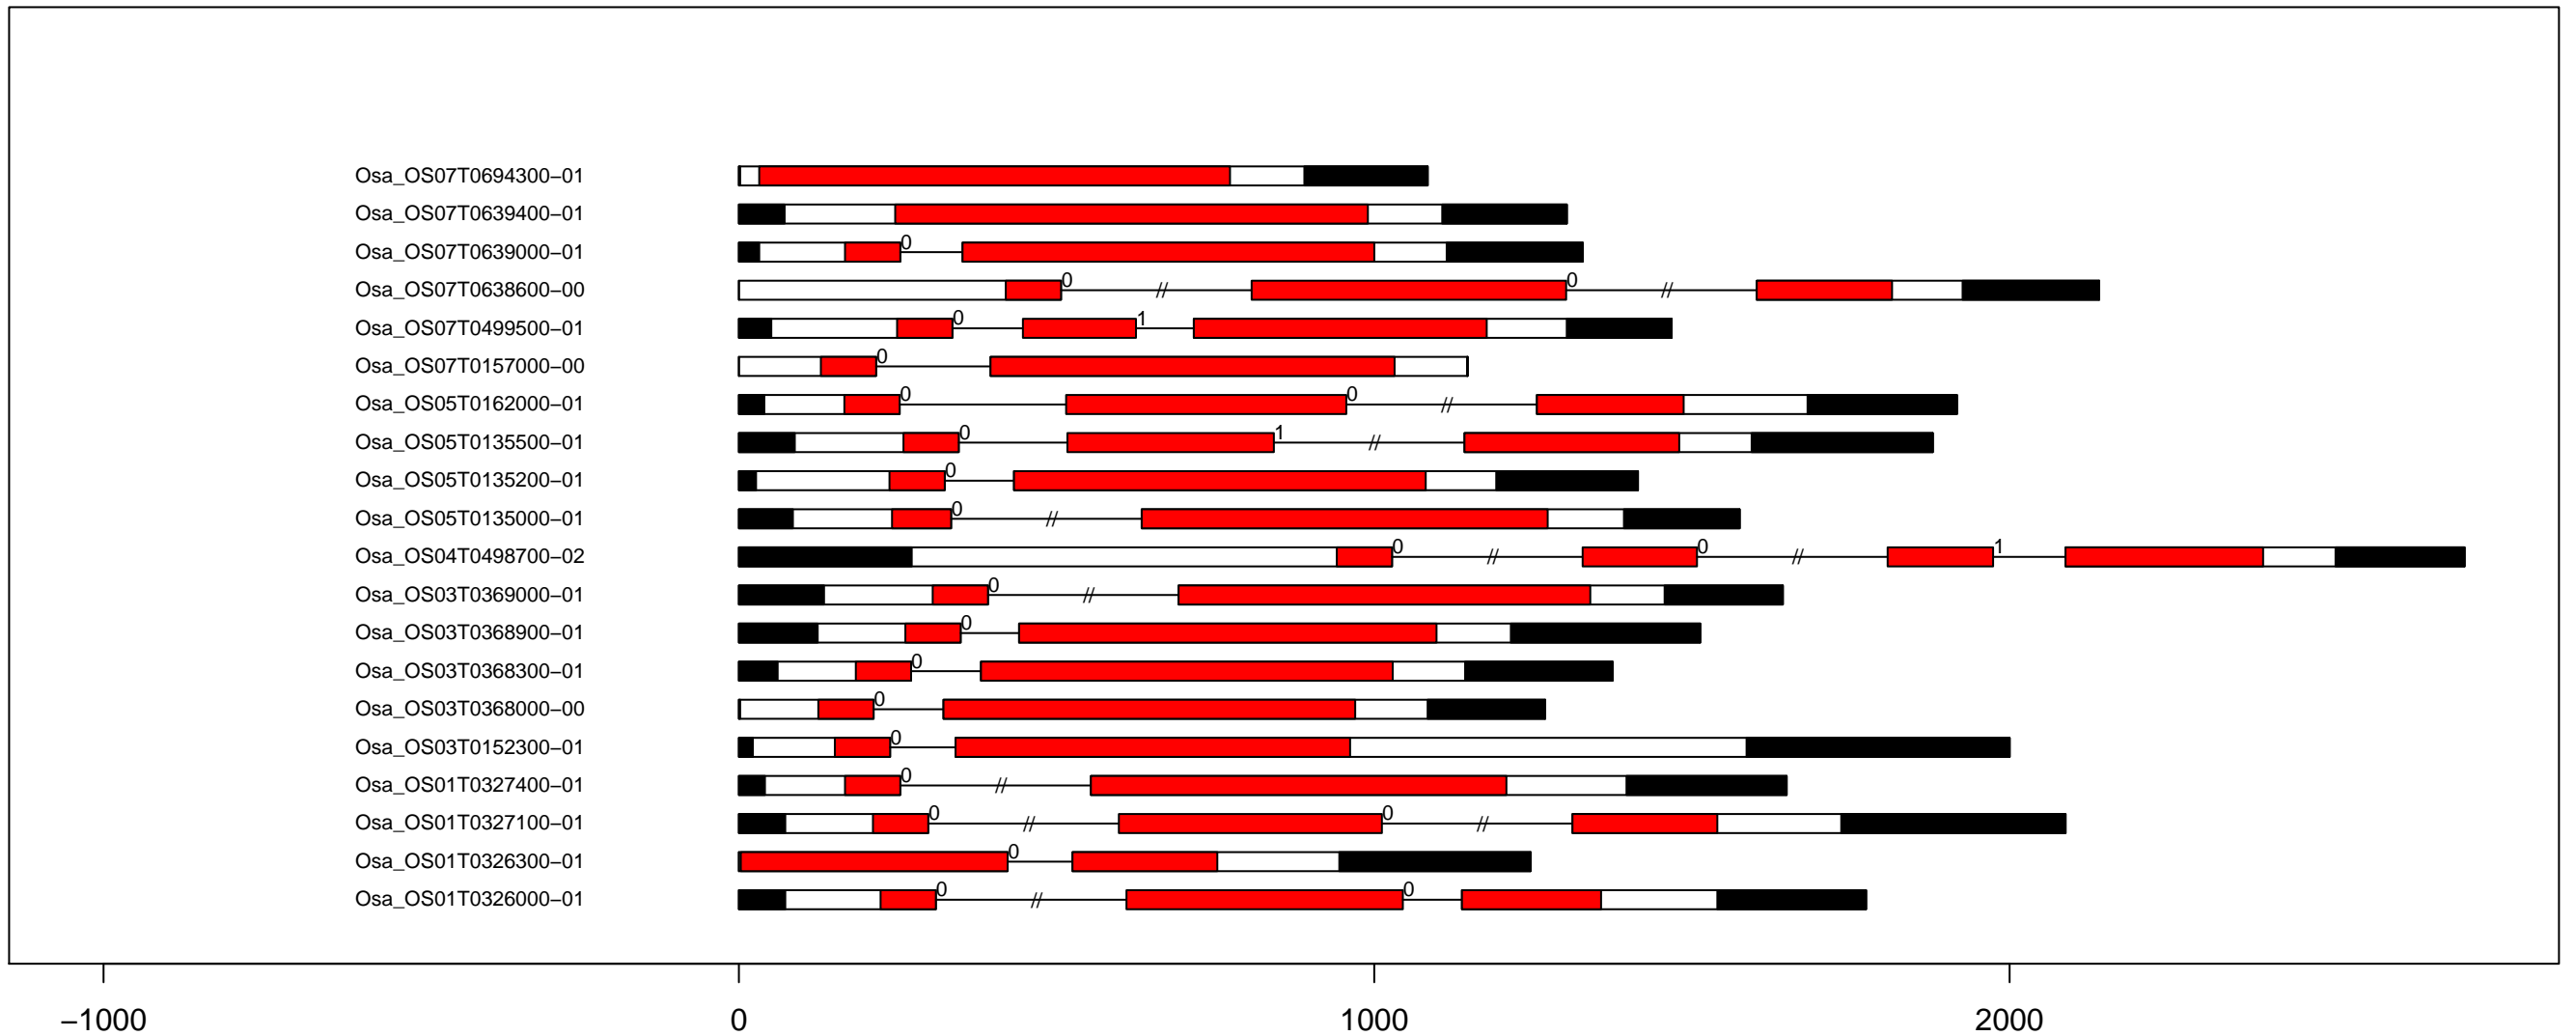

# O.sa class III peroxidase I subfamily exon-intron and prx domain diagram (part 2)

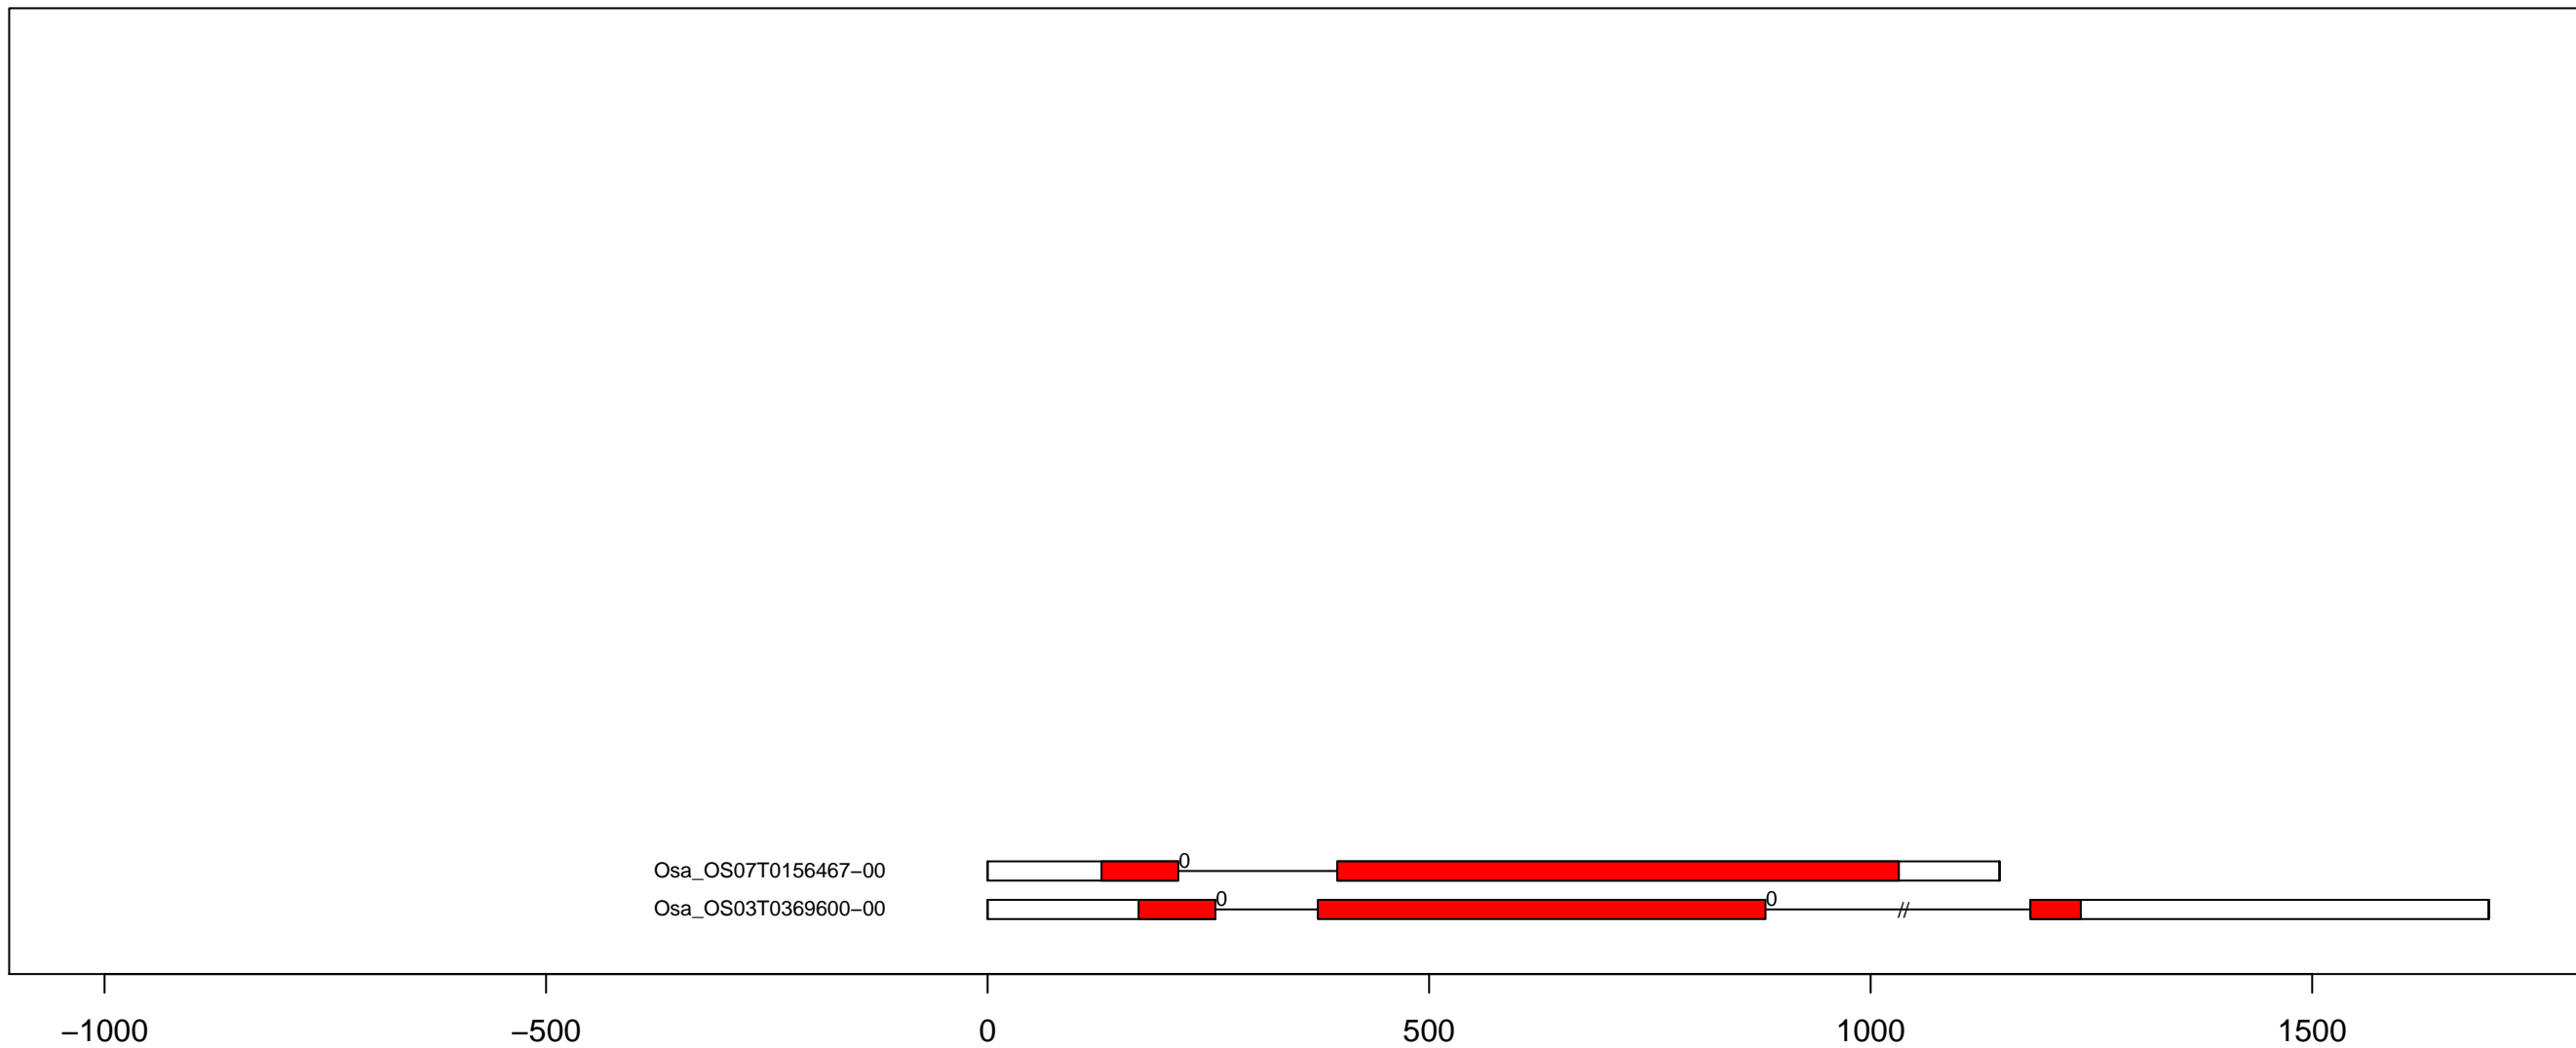

# O.sa class III peroxidase II subfamily exon-intron and prx domain diagram (all)

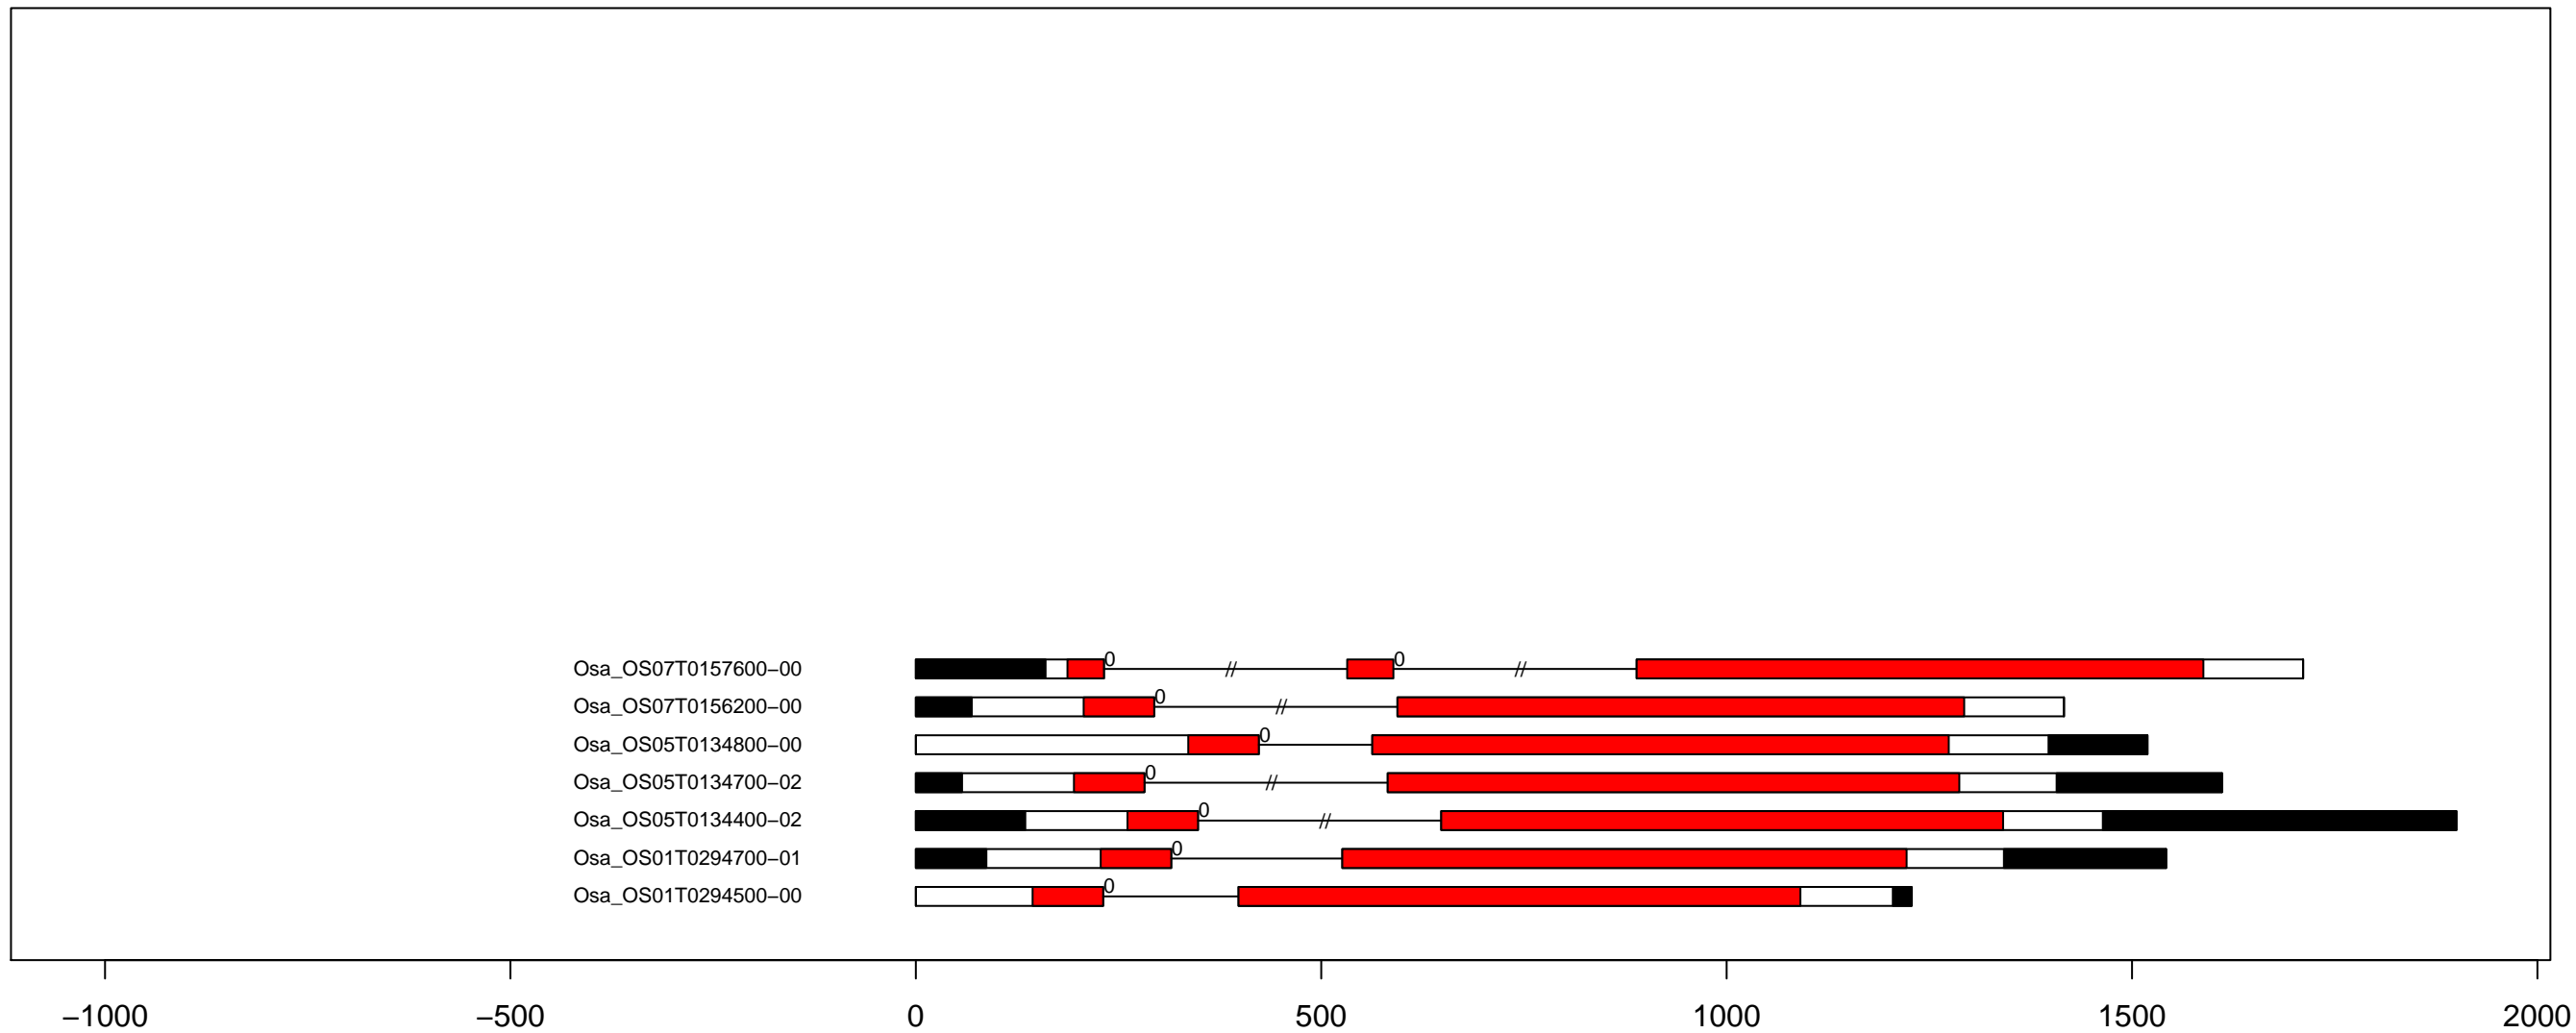

### O.sa class III peroxidase V subfamily exon-intron and prx domain diagram (all)

Osa\_OS12T0530100-01  
 Osa\_OS11T0661600-01  
 Osa\_OS10T0566800-01  
 Osa\_OS10T0536700-01  
 Osa\_OS09T0323700-00  
 Osa\_OS08T0113000-01  
 Osa\_OS07T0531400-01  
 Osa\_OS07T0104500-01  
 Osa\_OS06T0681600-01  
 Osa\_OS06T0490400-00  
 Osa\_OS06T0306300-01  
 Osa\_OS05T0499400-02  
 Osa\_OS05T0499300-01  
 Osa\_OS03T0563600-01  
 Osa\_OS03T0121300-01  
 Osa\_OS03T0121200-01  
 Osa\_OS02T0833900-03  
 Osa\_OS02T0161800-01  
 Osa\_OS01T0787000-01

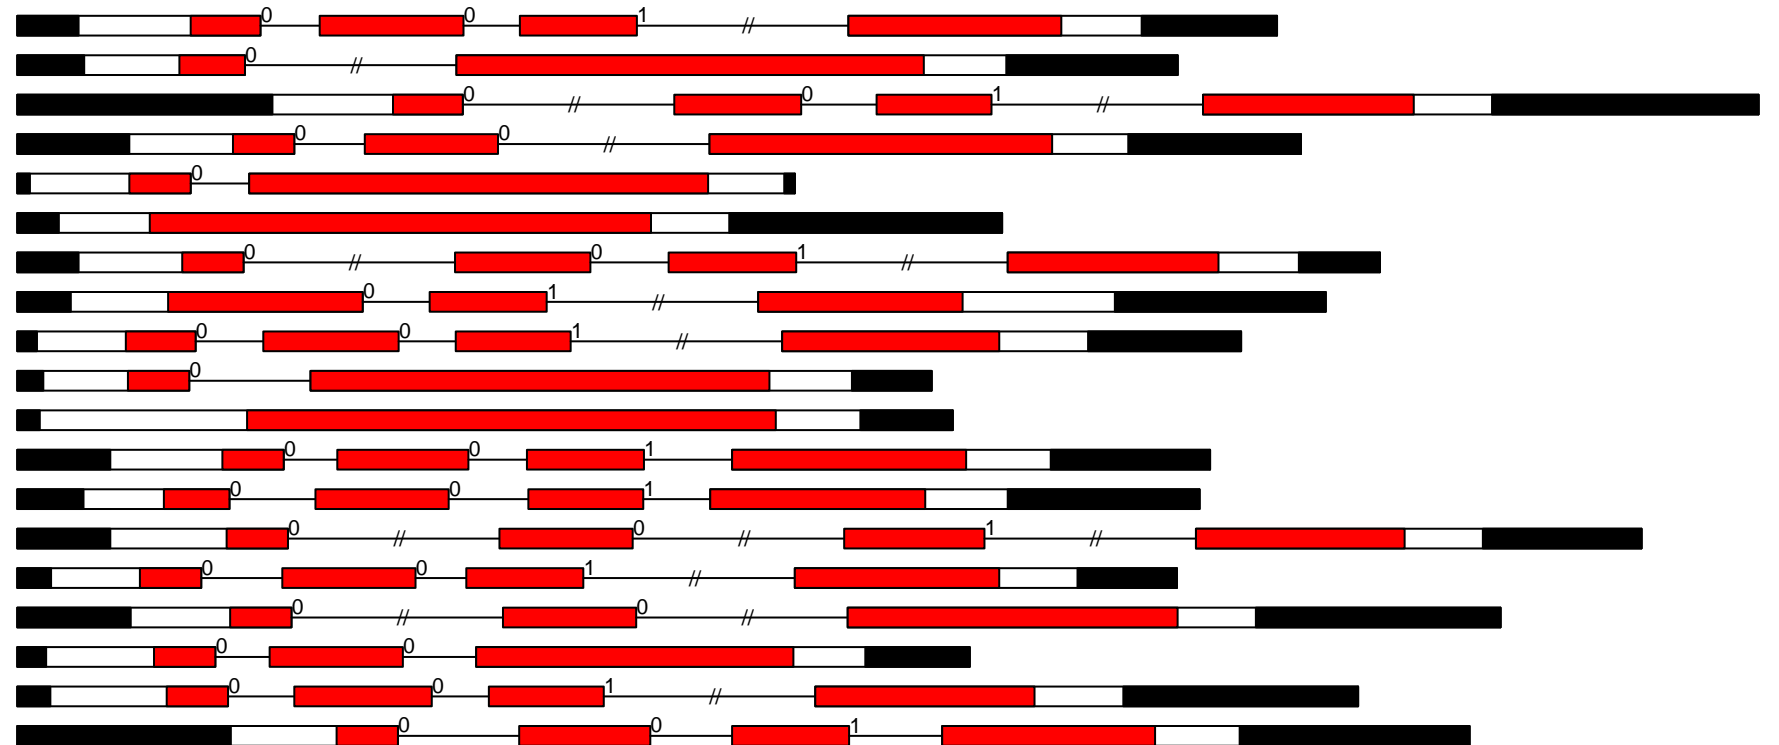

-1000

-500

0

500

1000

1500

2000

2500



# O.sa class III peroxidase VI subfamily exon-intron and prx domain diagram (all)

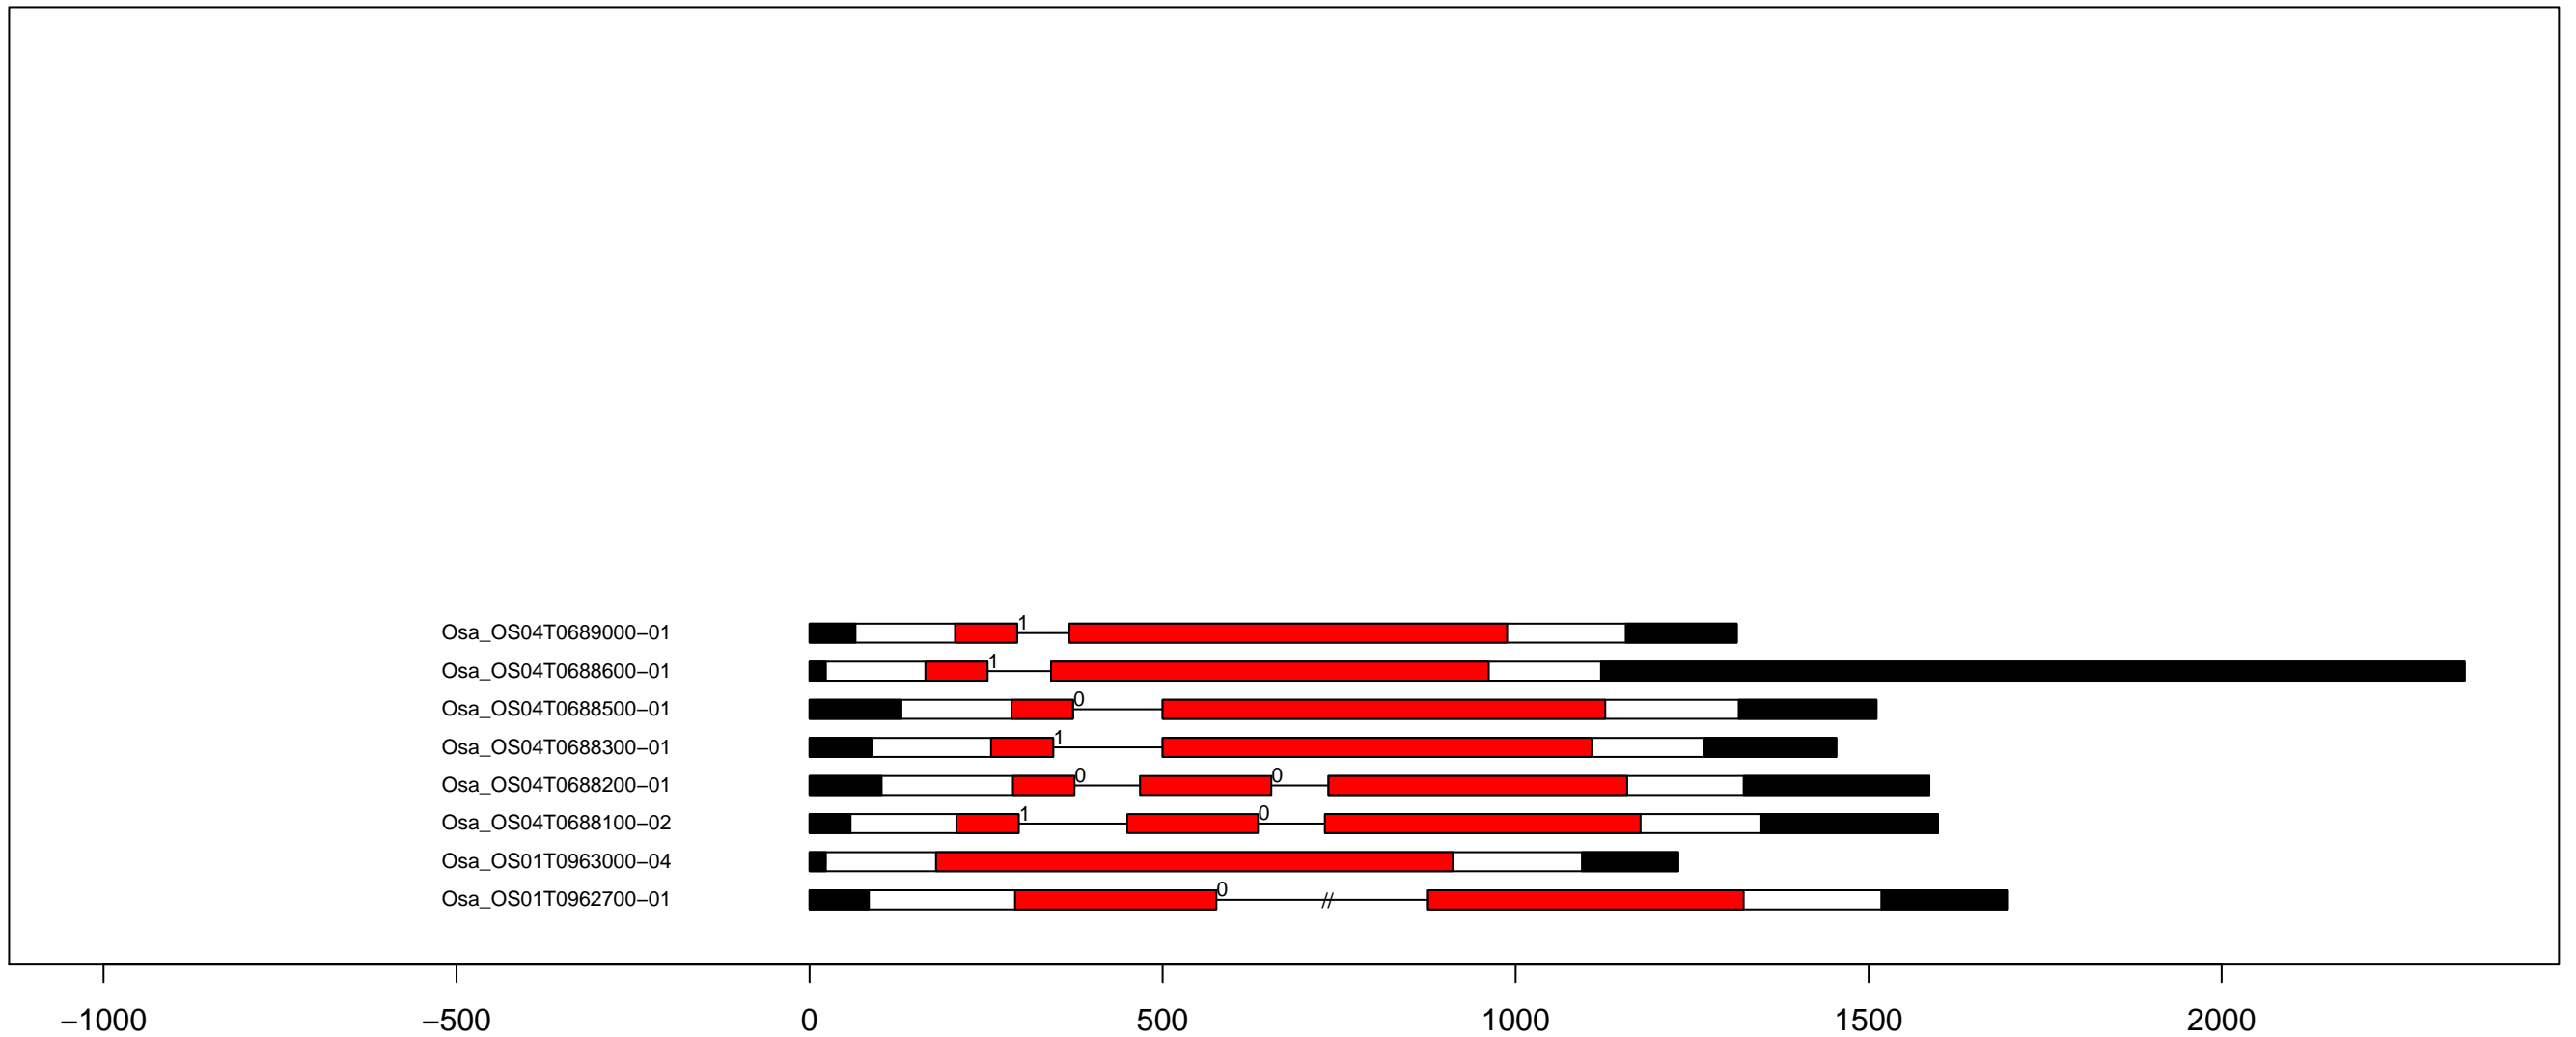

# O.sa class III peroxidase VII subfamily exon-intron and prx domain diagram (all)

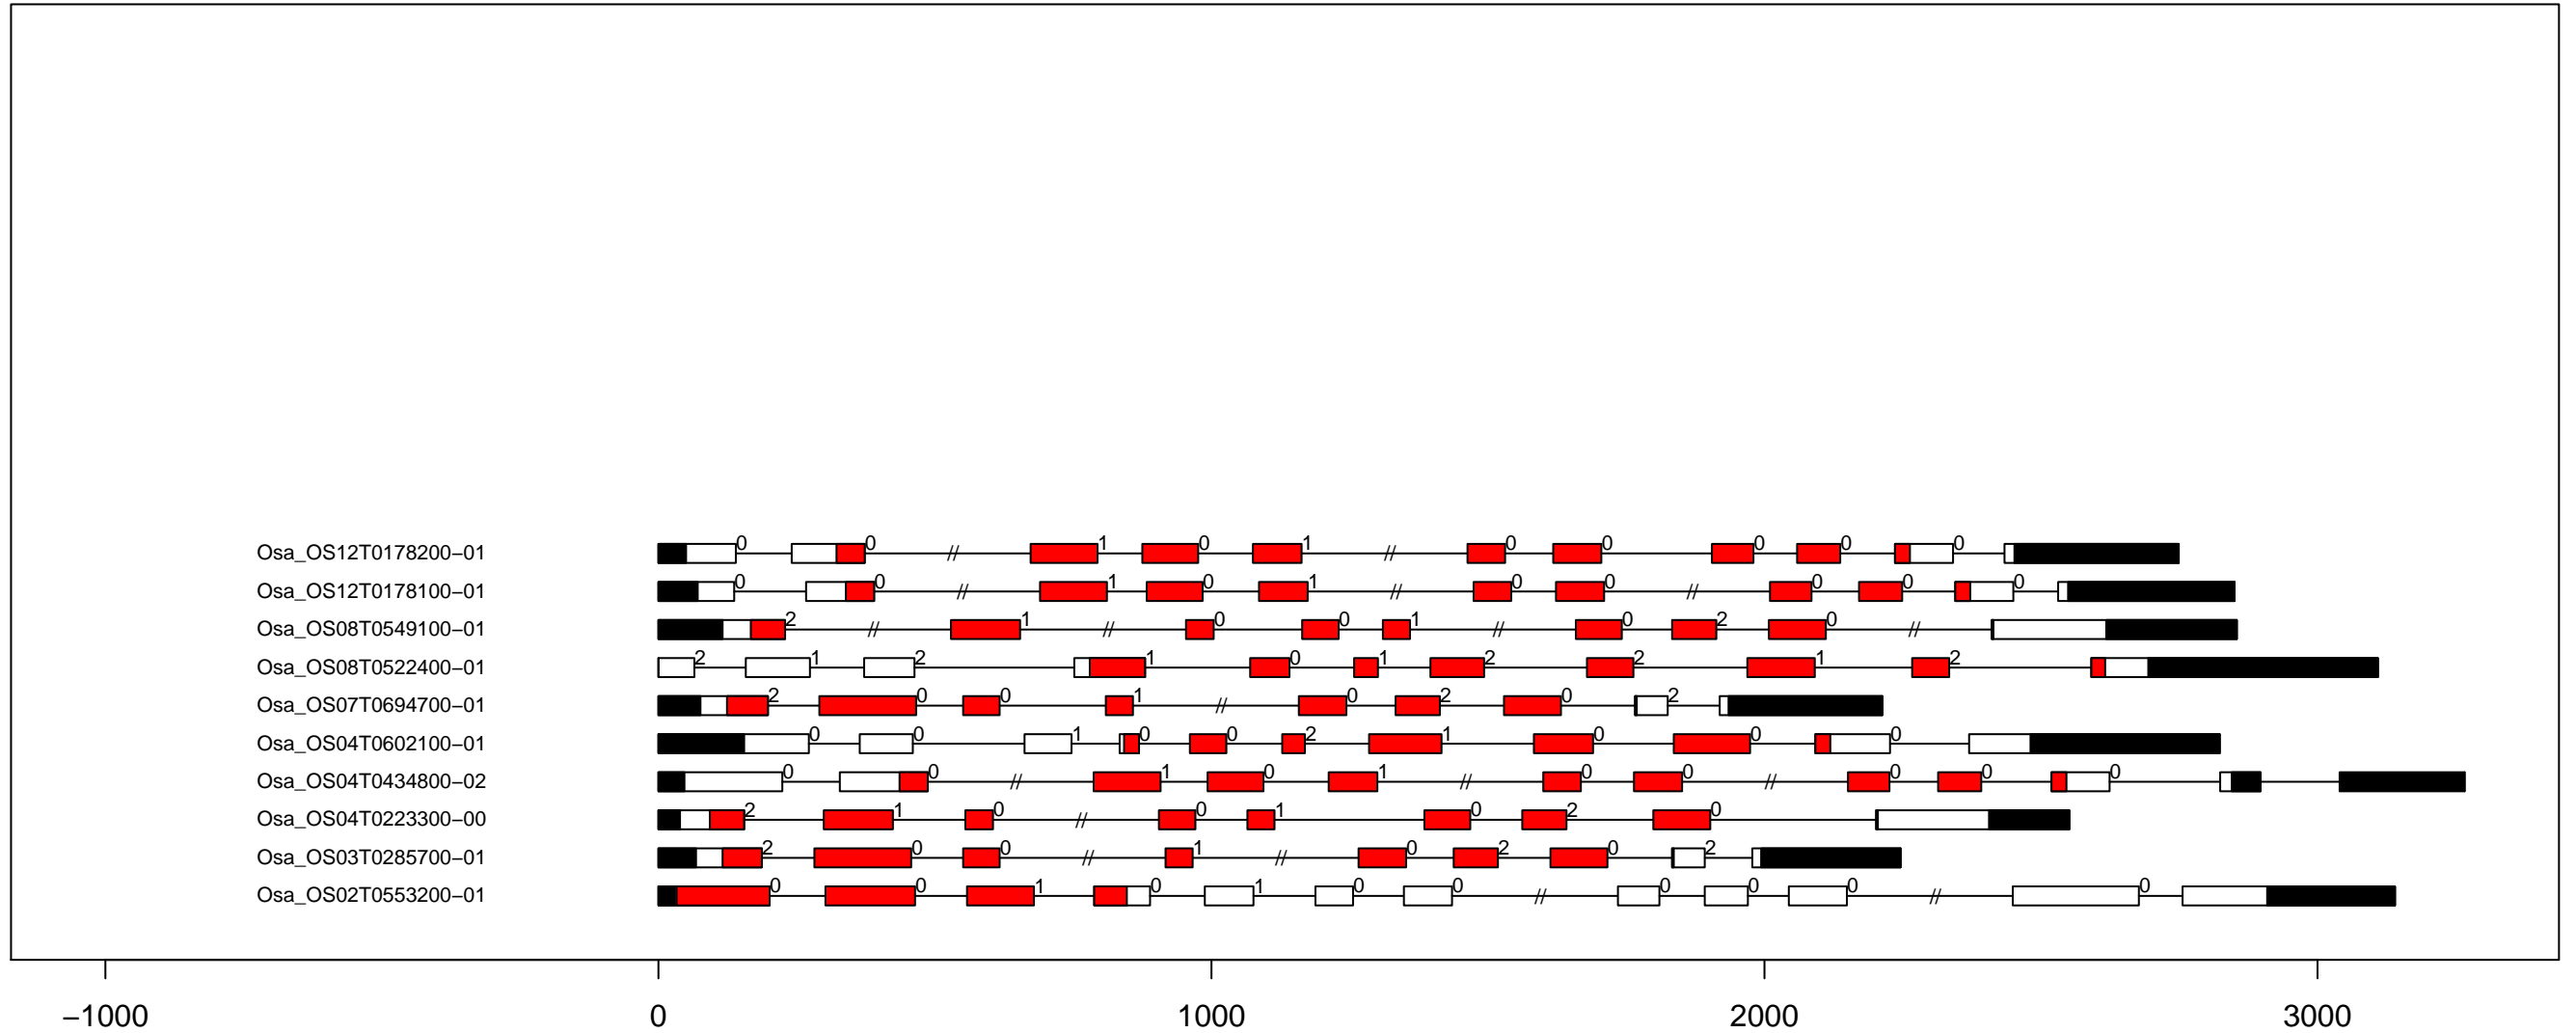

### O.sa class III peroxidase IX subfamily exon-intron and prx domain diagram (all)

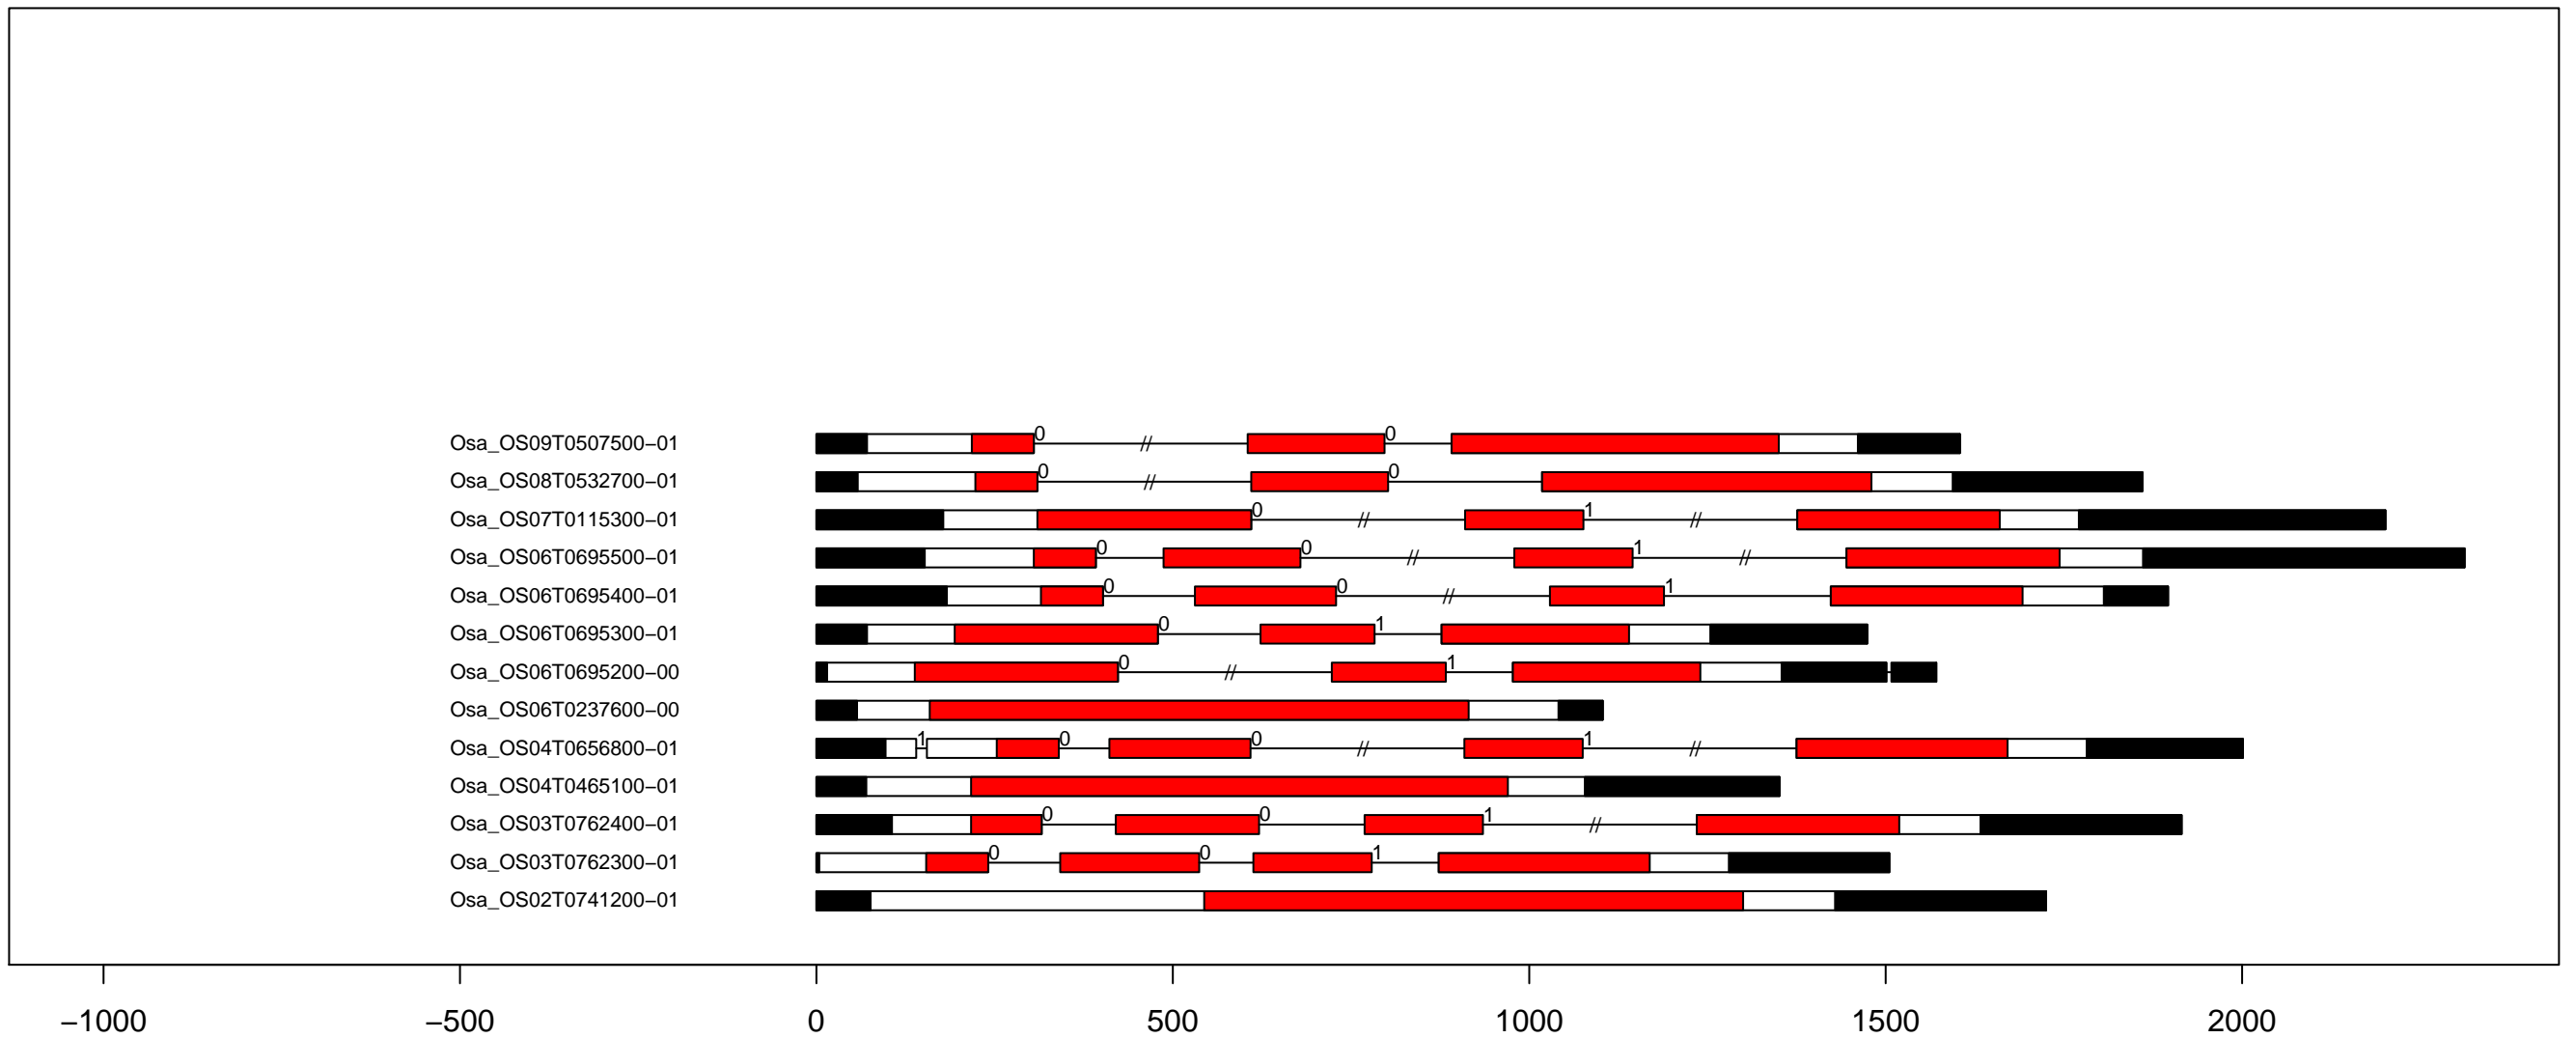

# O.sa class III peroxidase X subfamily exon-intron and prx domain diagram (all)

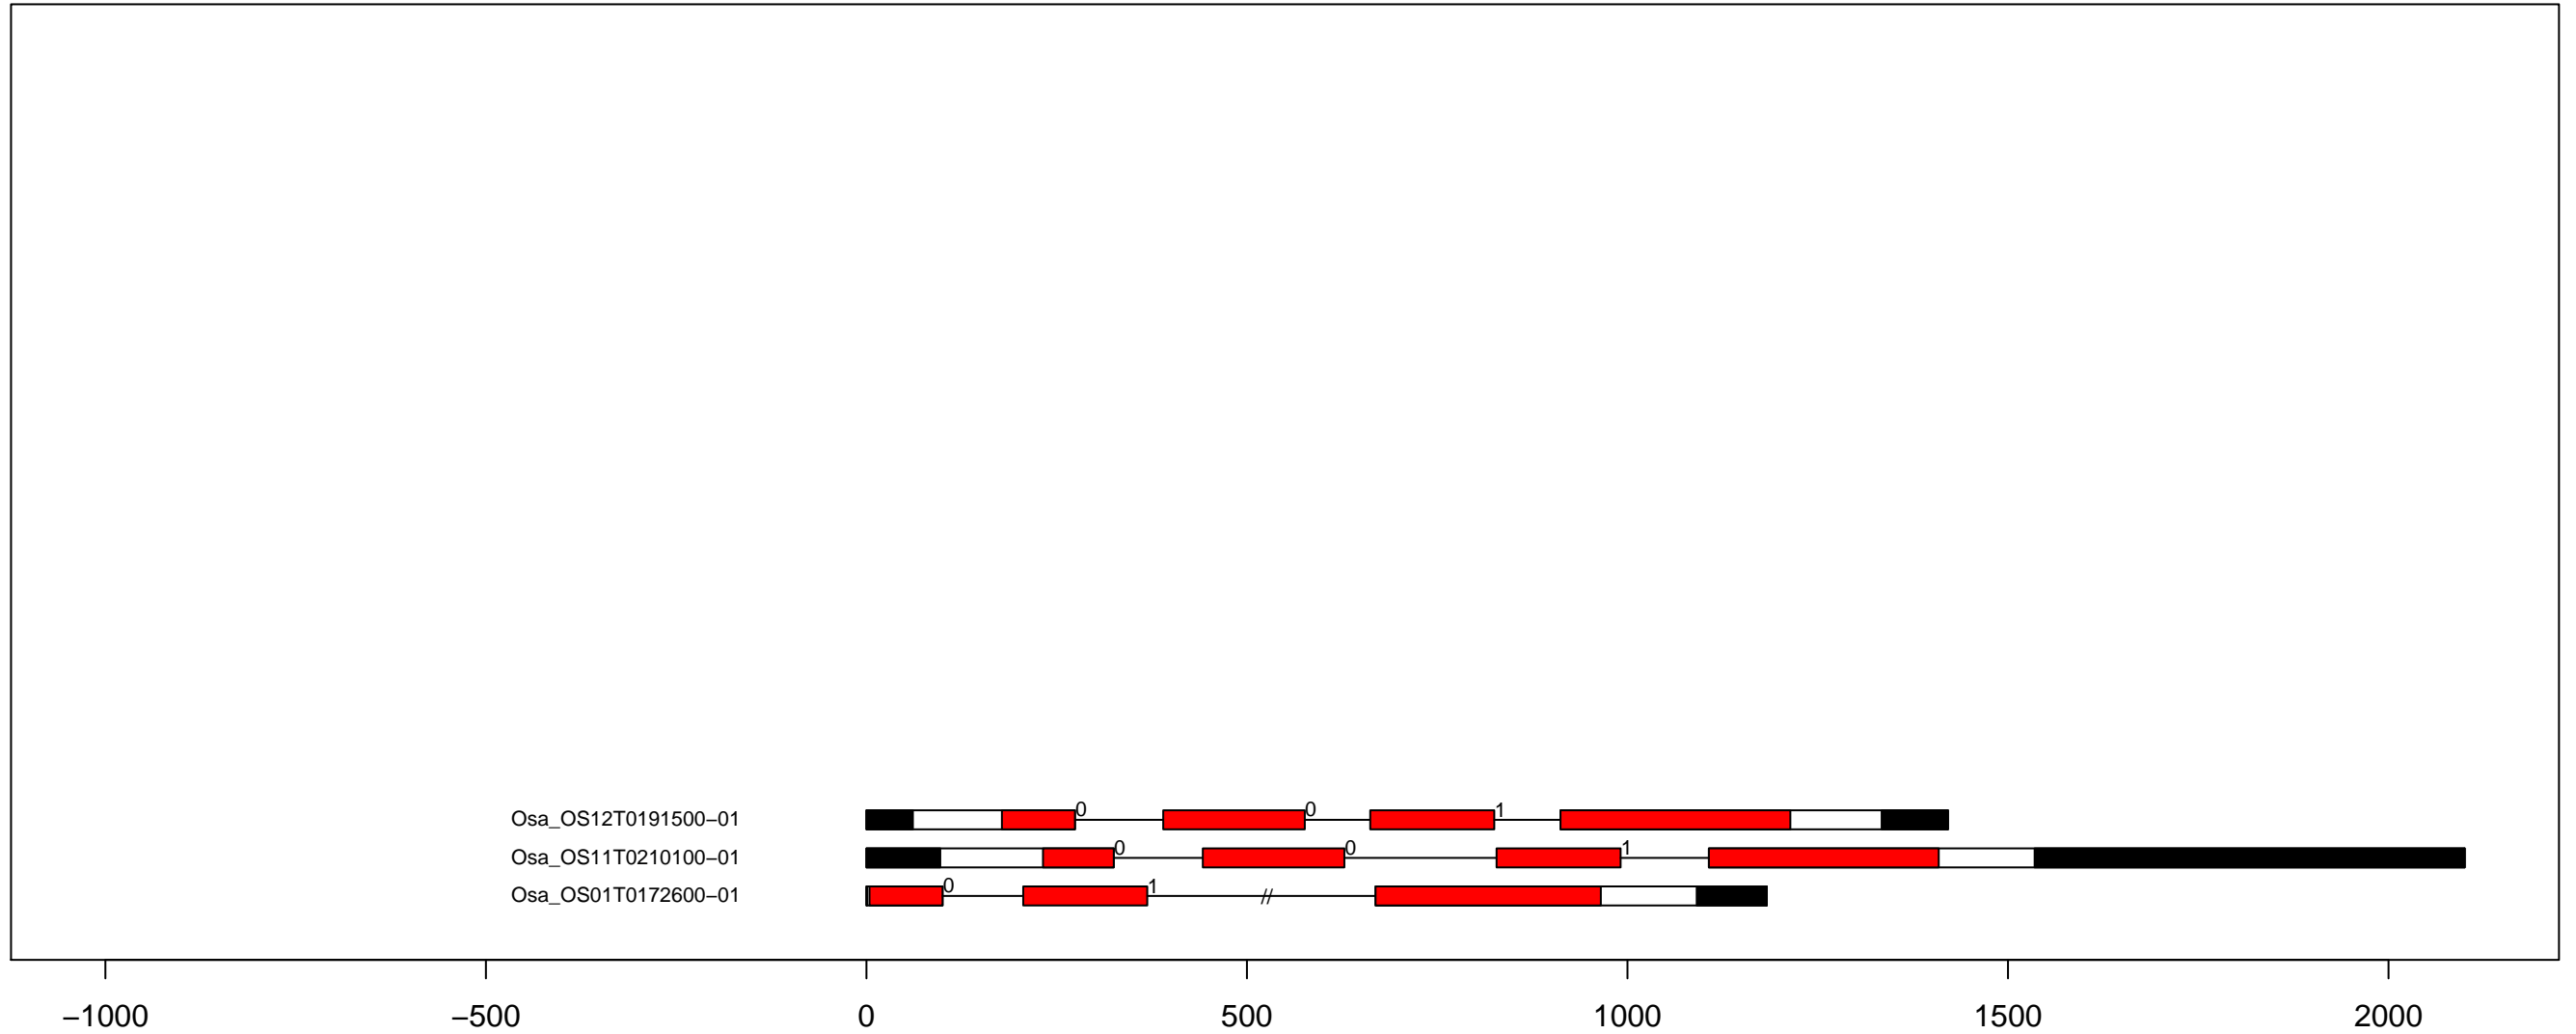

# O.sa class III peroxidase XII subfamily exon-intron and prx domain diagram (all)

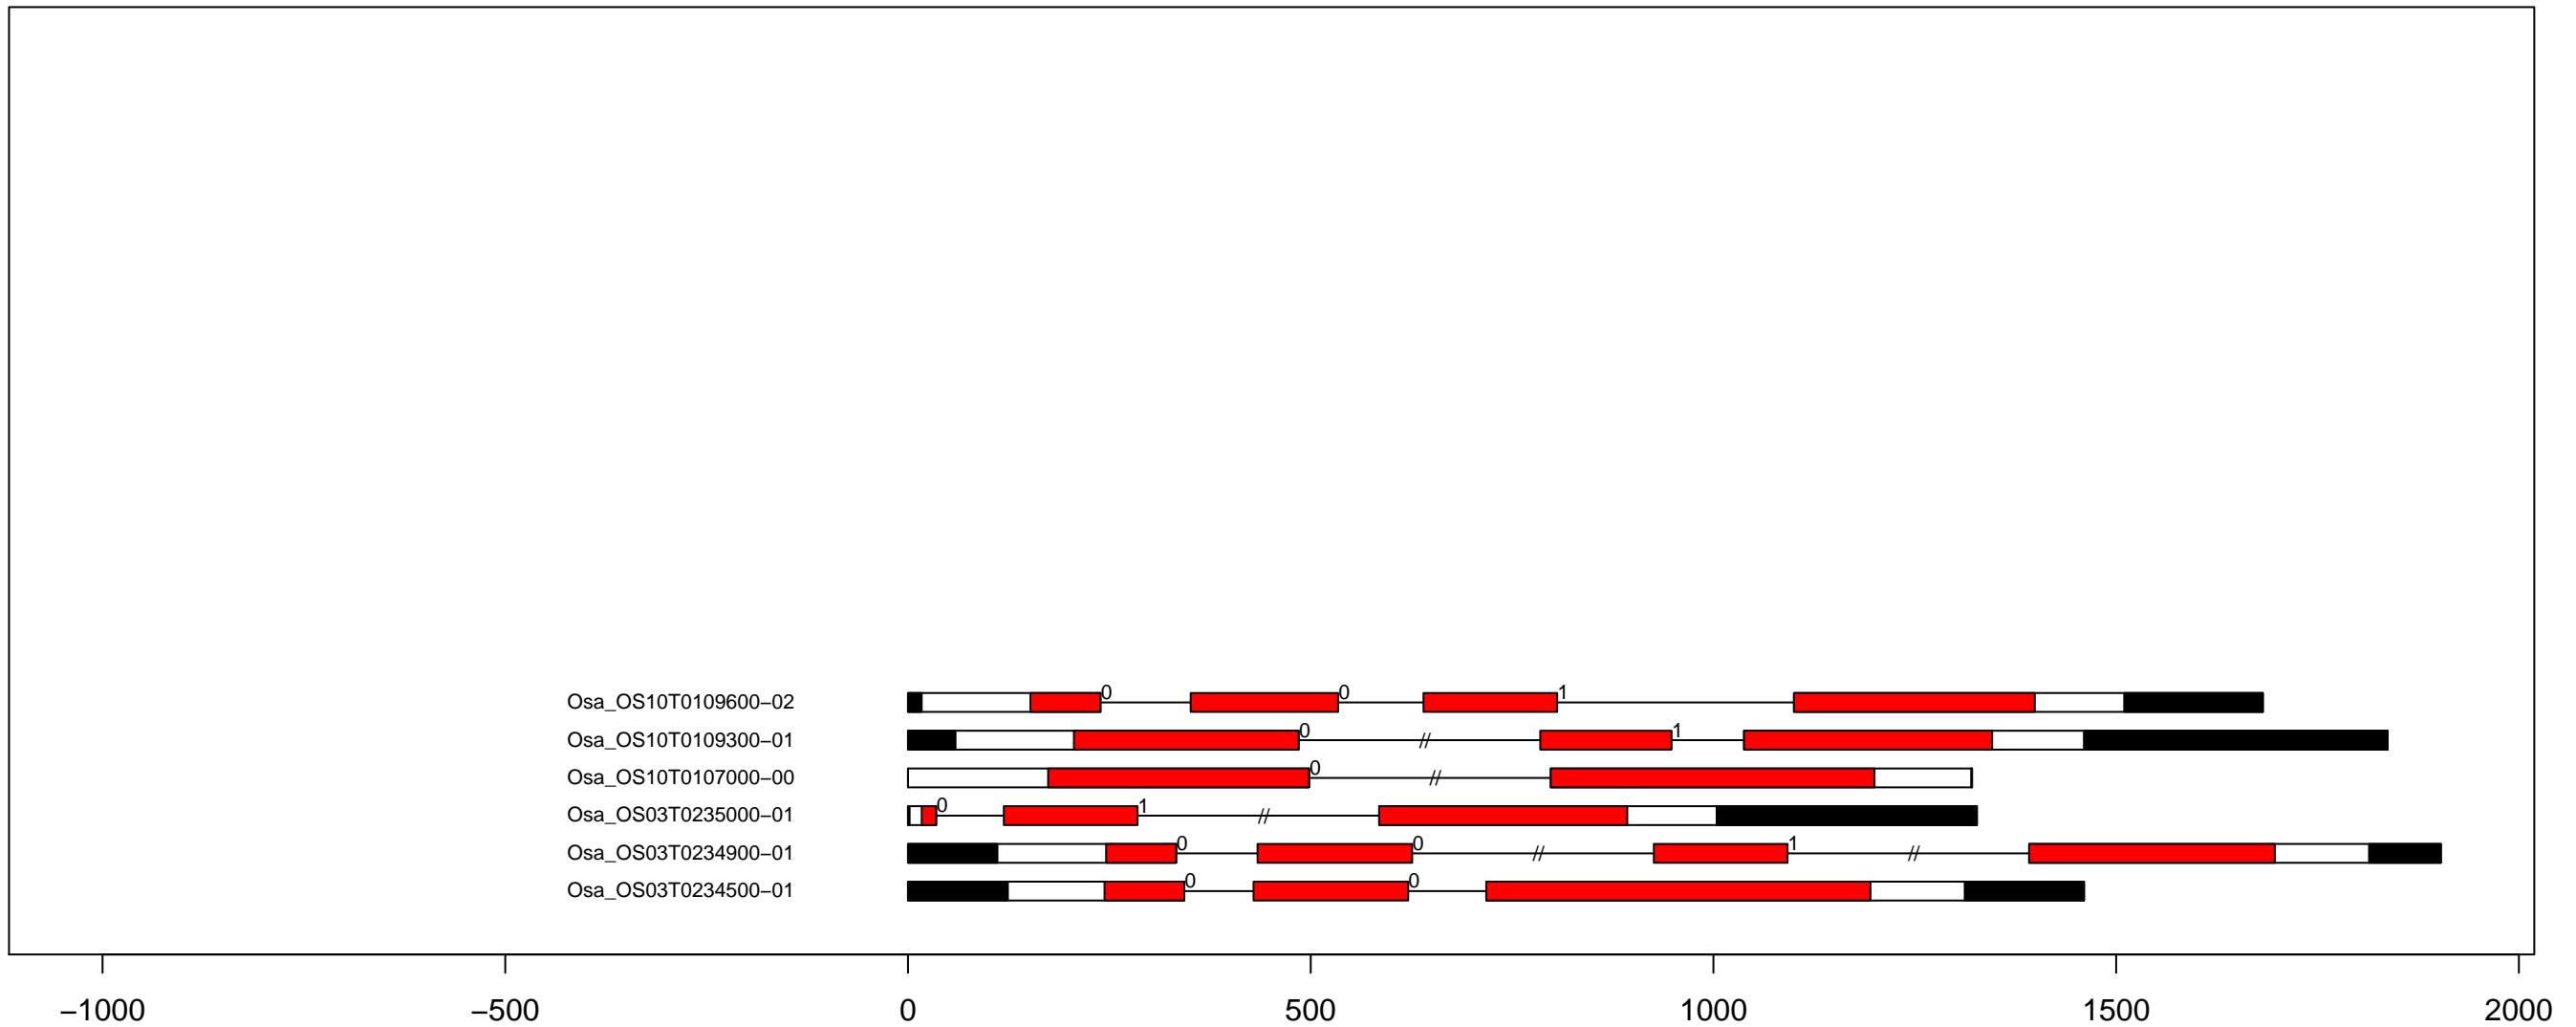

# O.sa class III peroxidase XIV subfamily exon-intron and prx domain diagram (all)

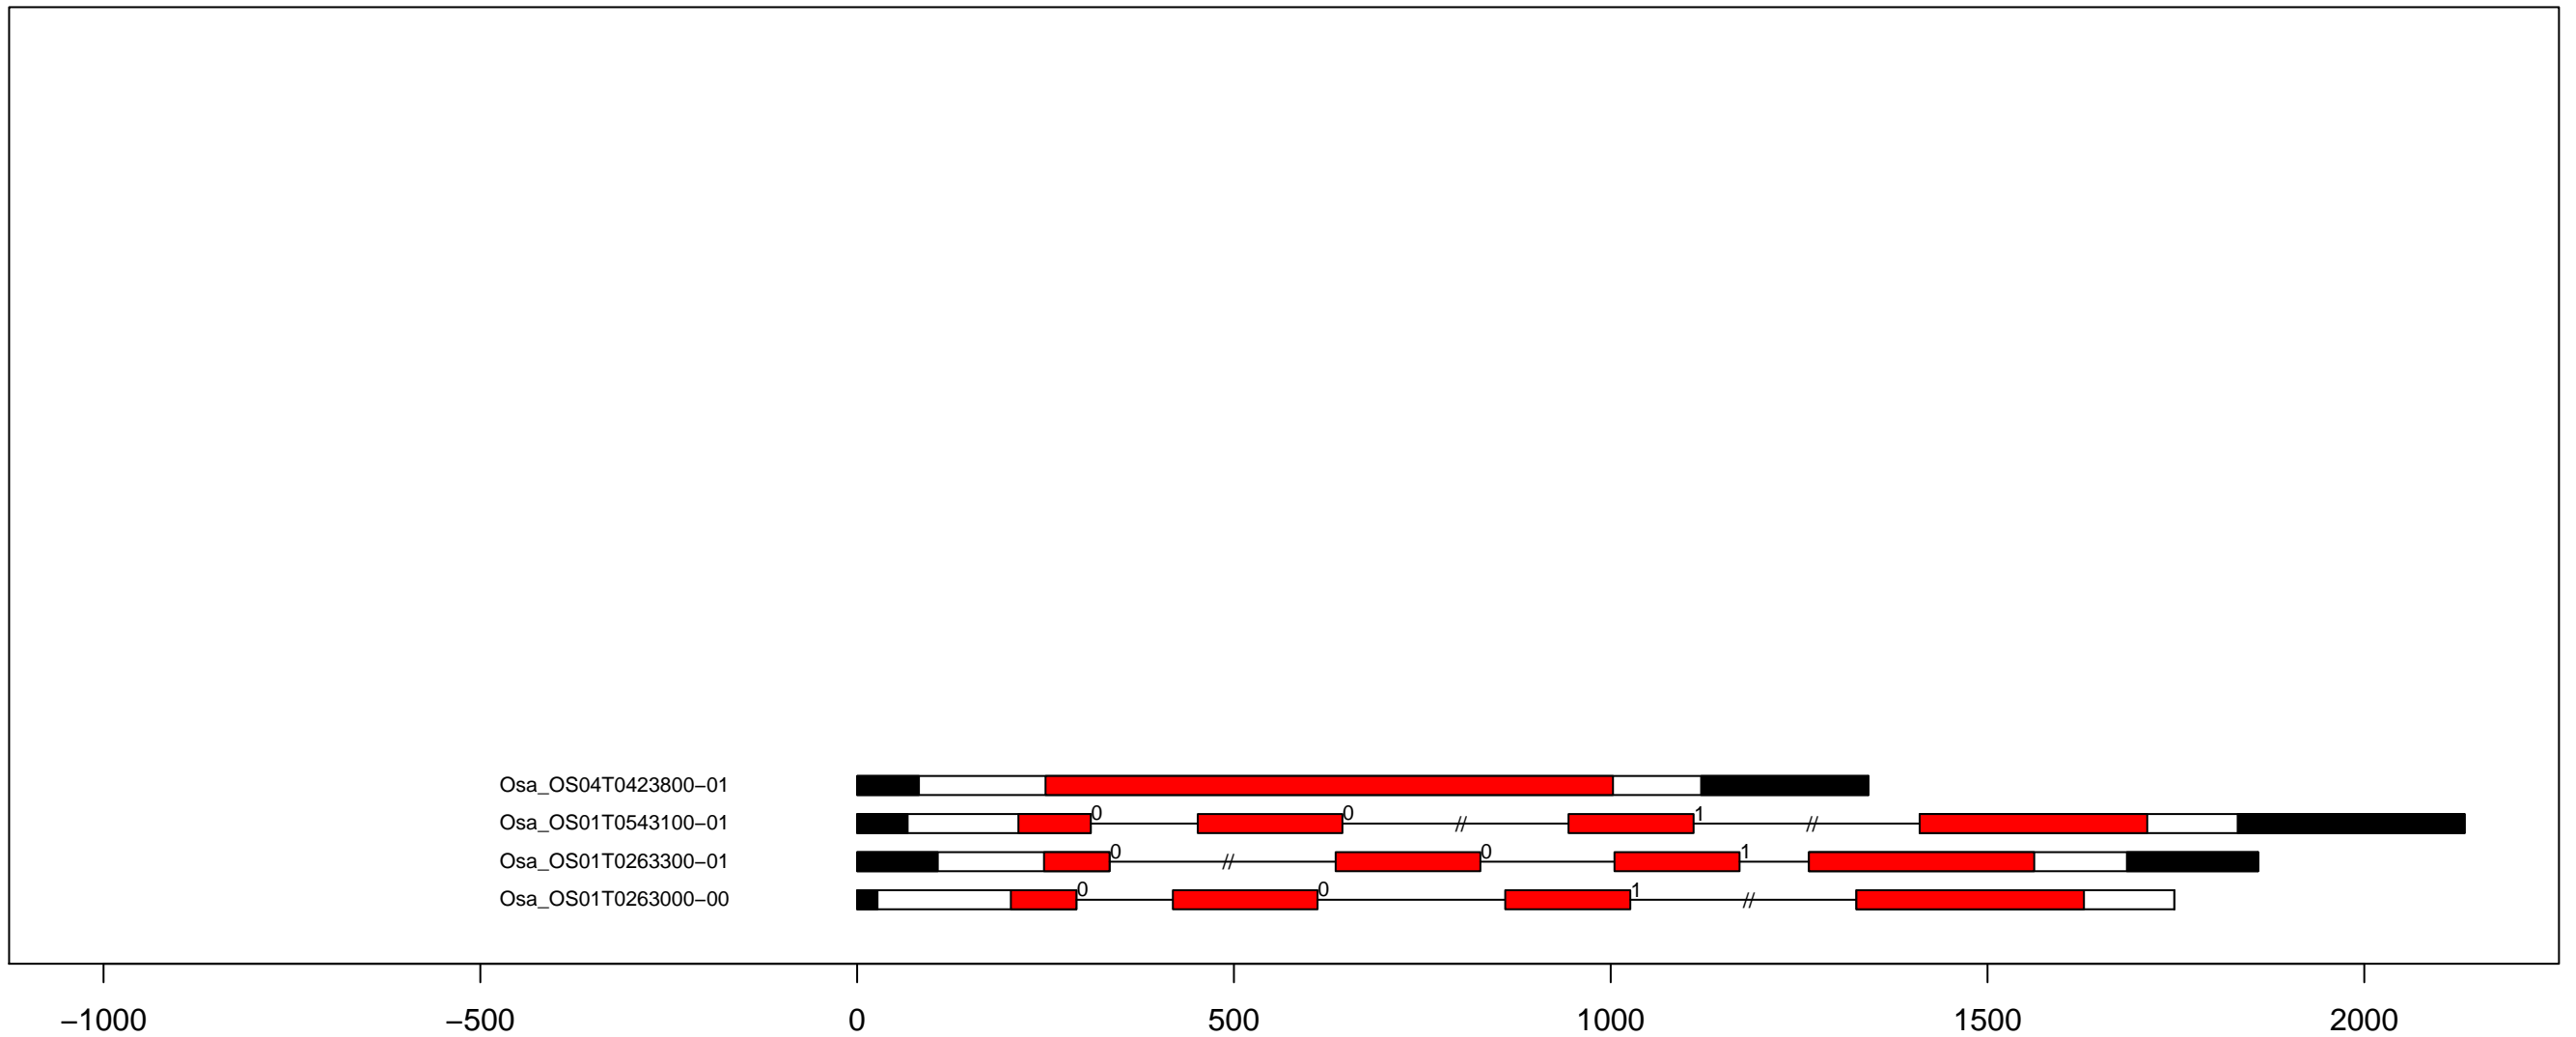

# O.sa class III peroxidase XV subfamily exon-intron and prx domain diagram (all)

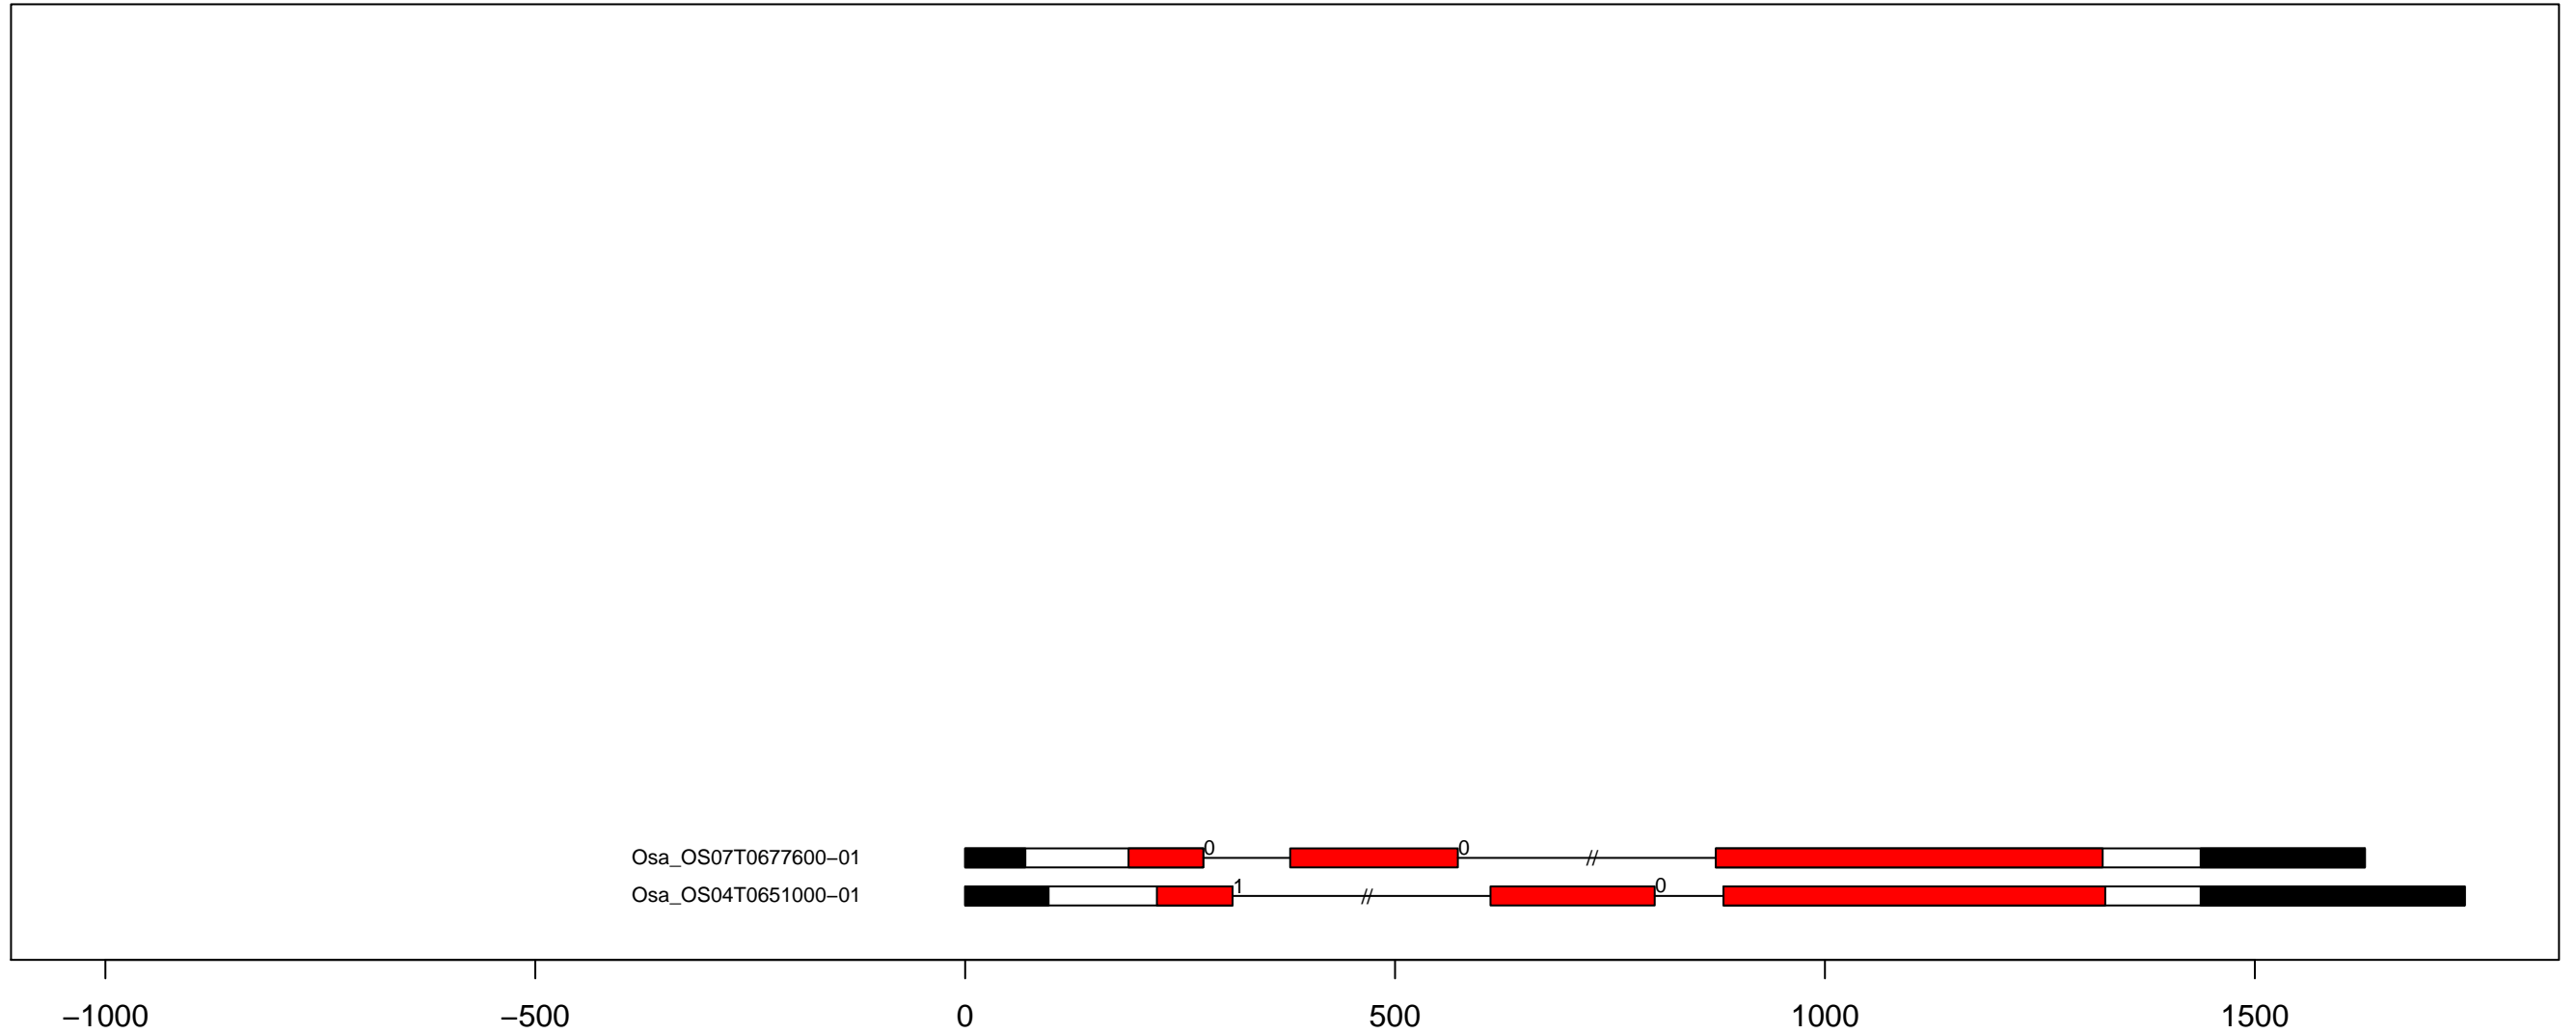

### O.sa class III peroxidase XVI subfamily exon-intron and prx domain diagram (all)

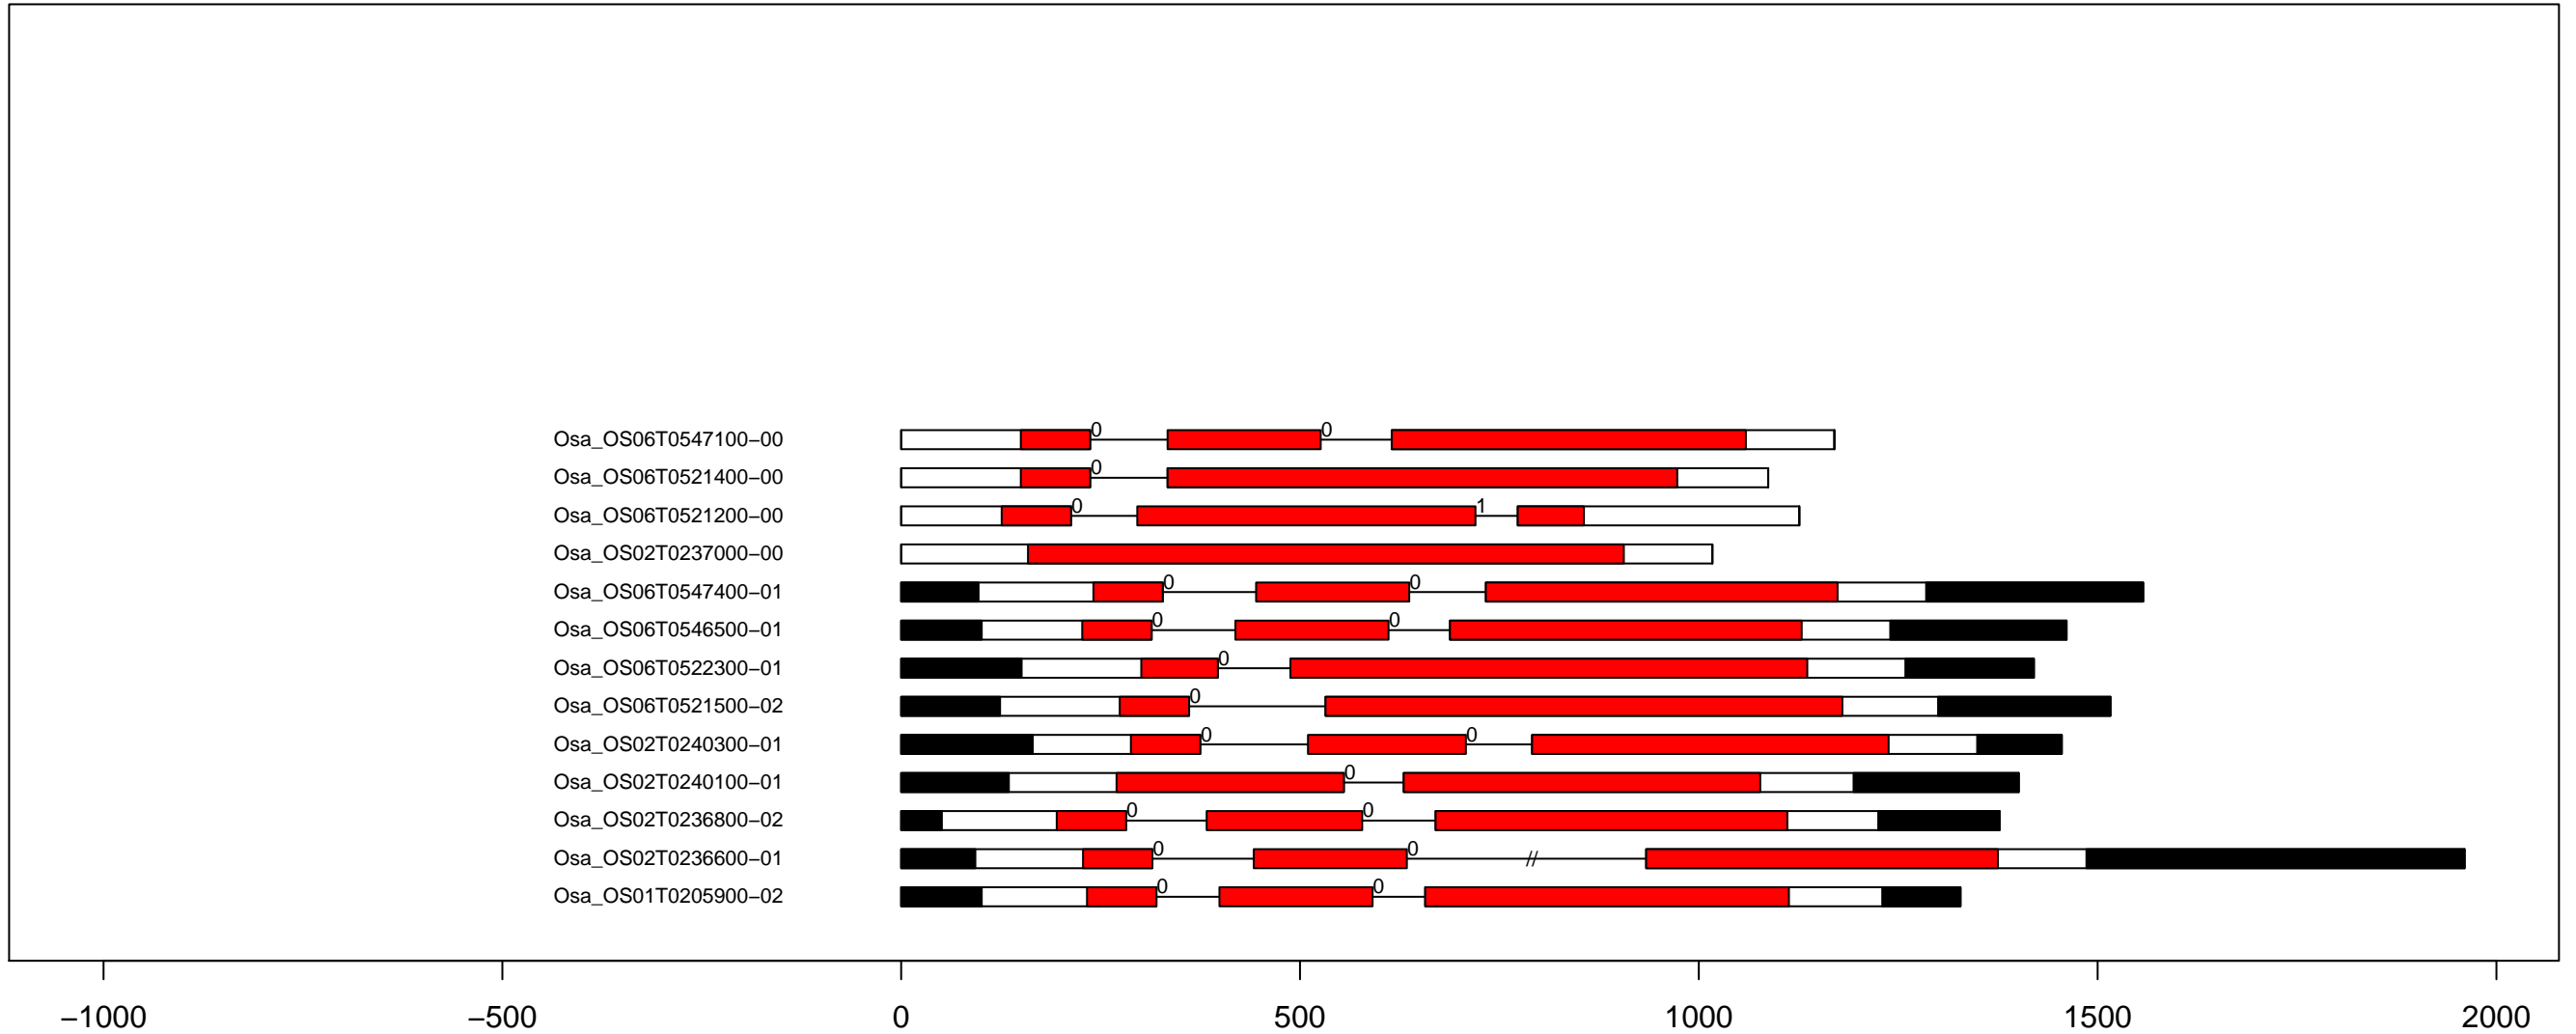



### O.sa class III peroxidase XVII subfamily exon-intron and prx domain diagram (all)

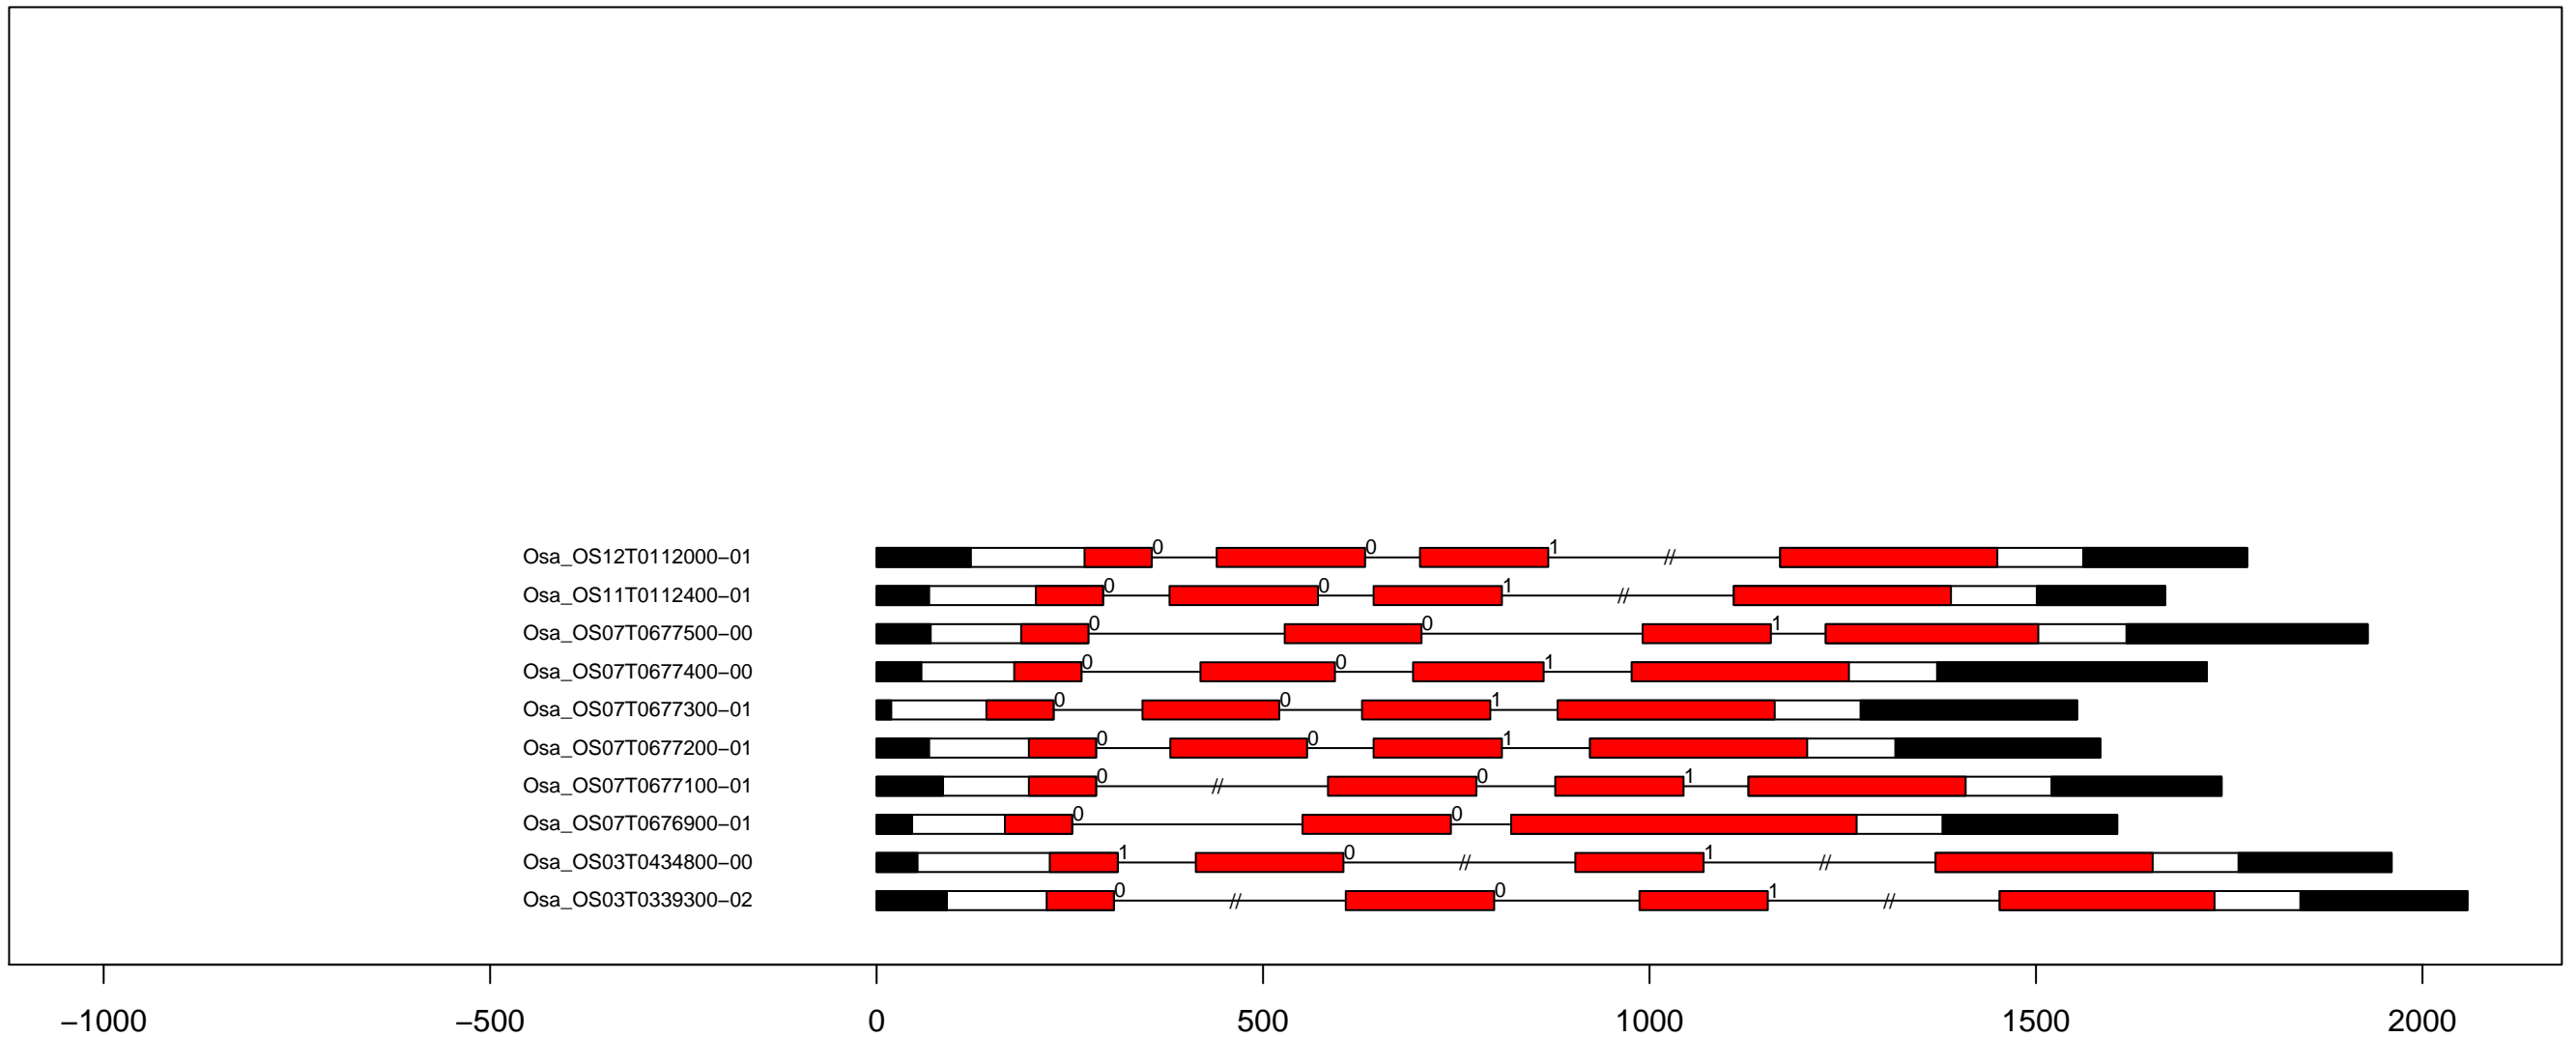

# O.sa class III peroxidase XVIII subfamily exon-intron and prx domain diagram (all)

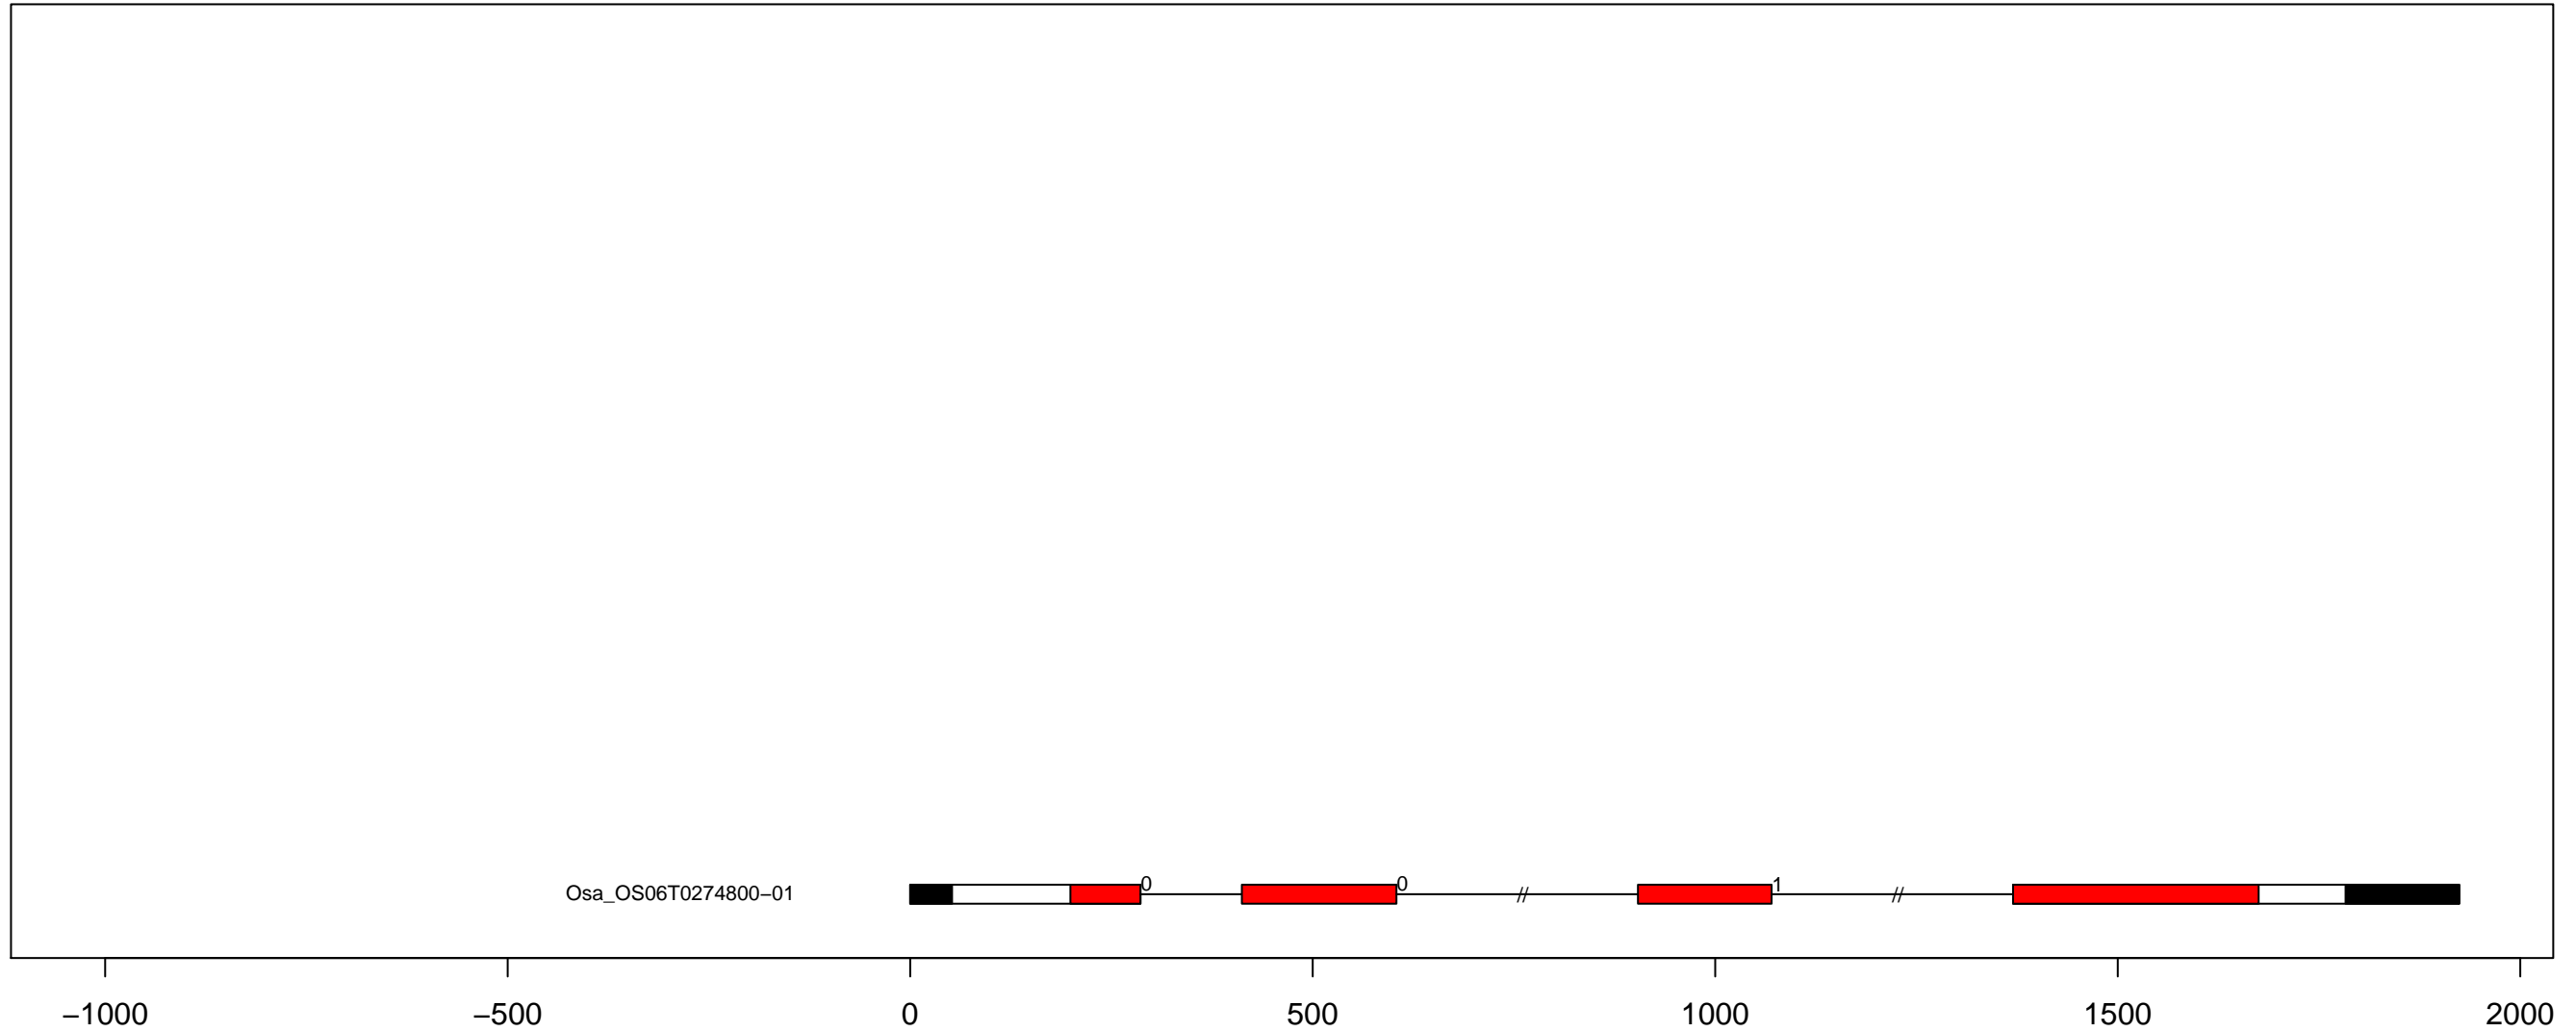

# O.sa class III peroxidase unclar\_classification subfamily exon-intron and prx domain diagram (all)

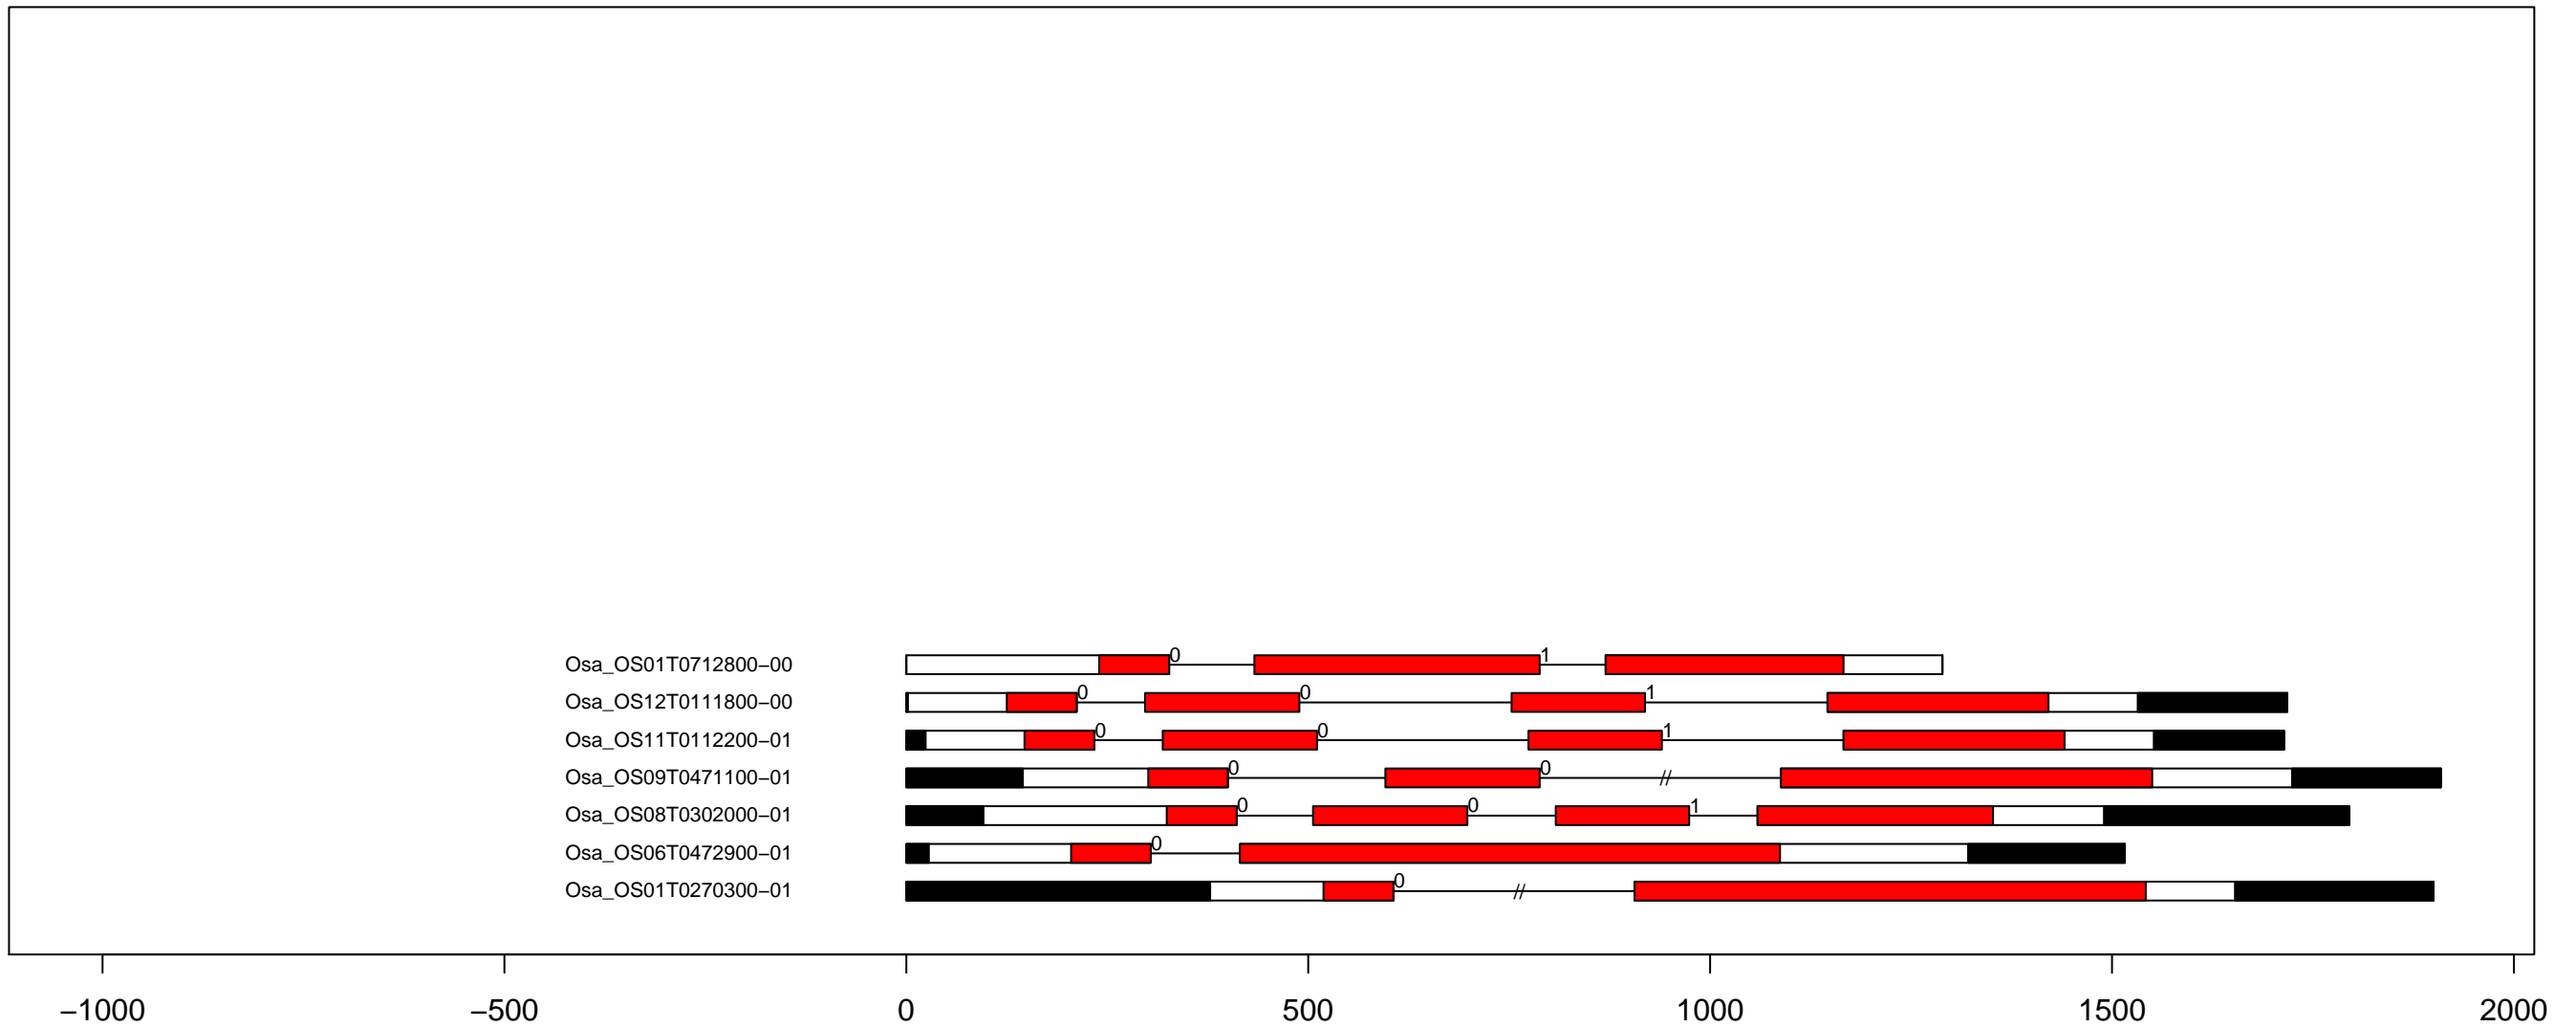



## Z.ma class III peroxidase I subfamily exon-intron and prx domain diagram (part 2)

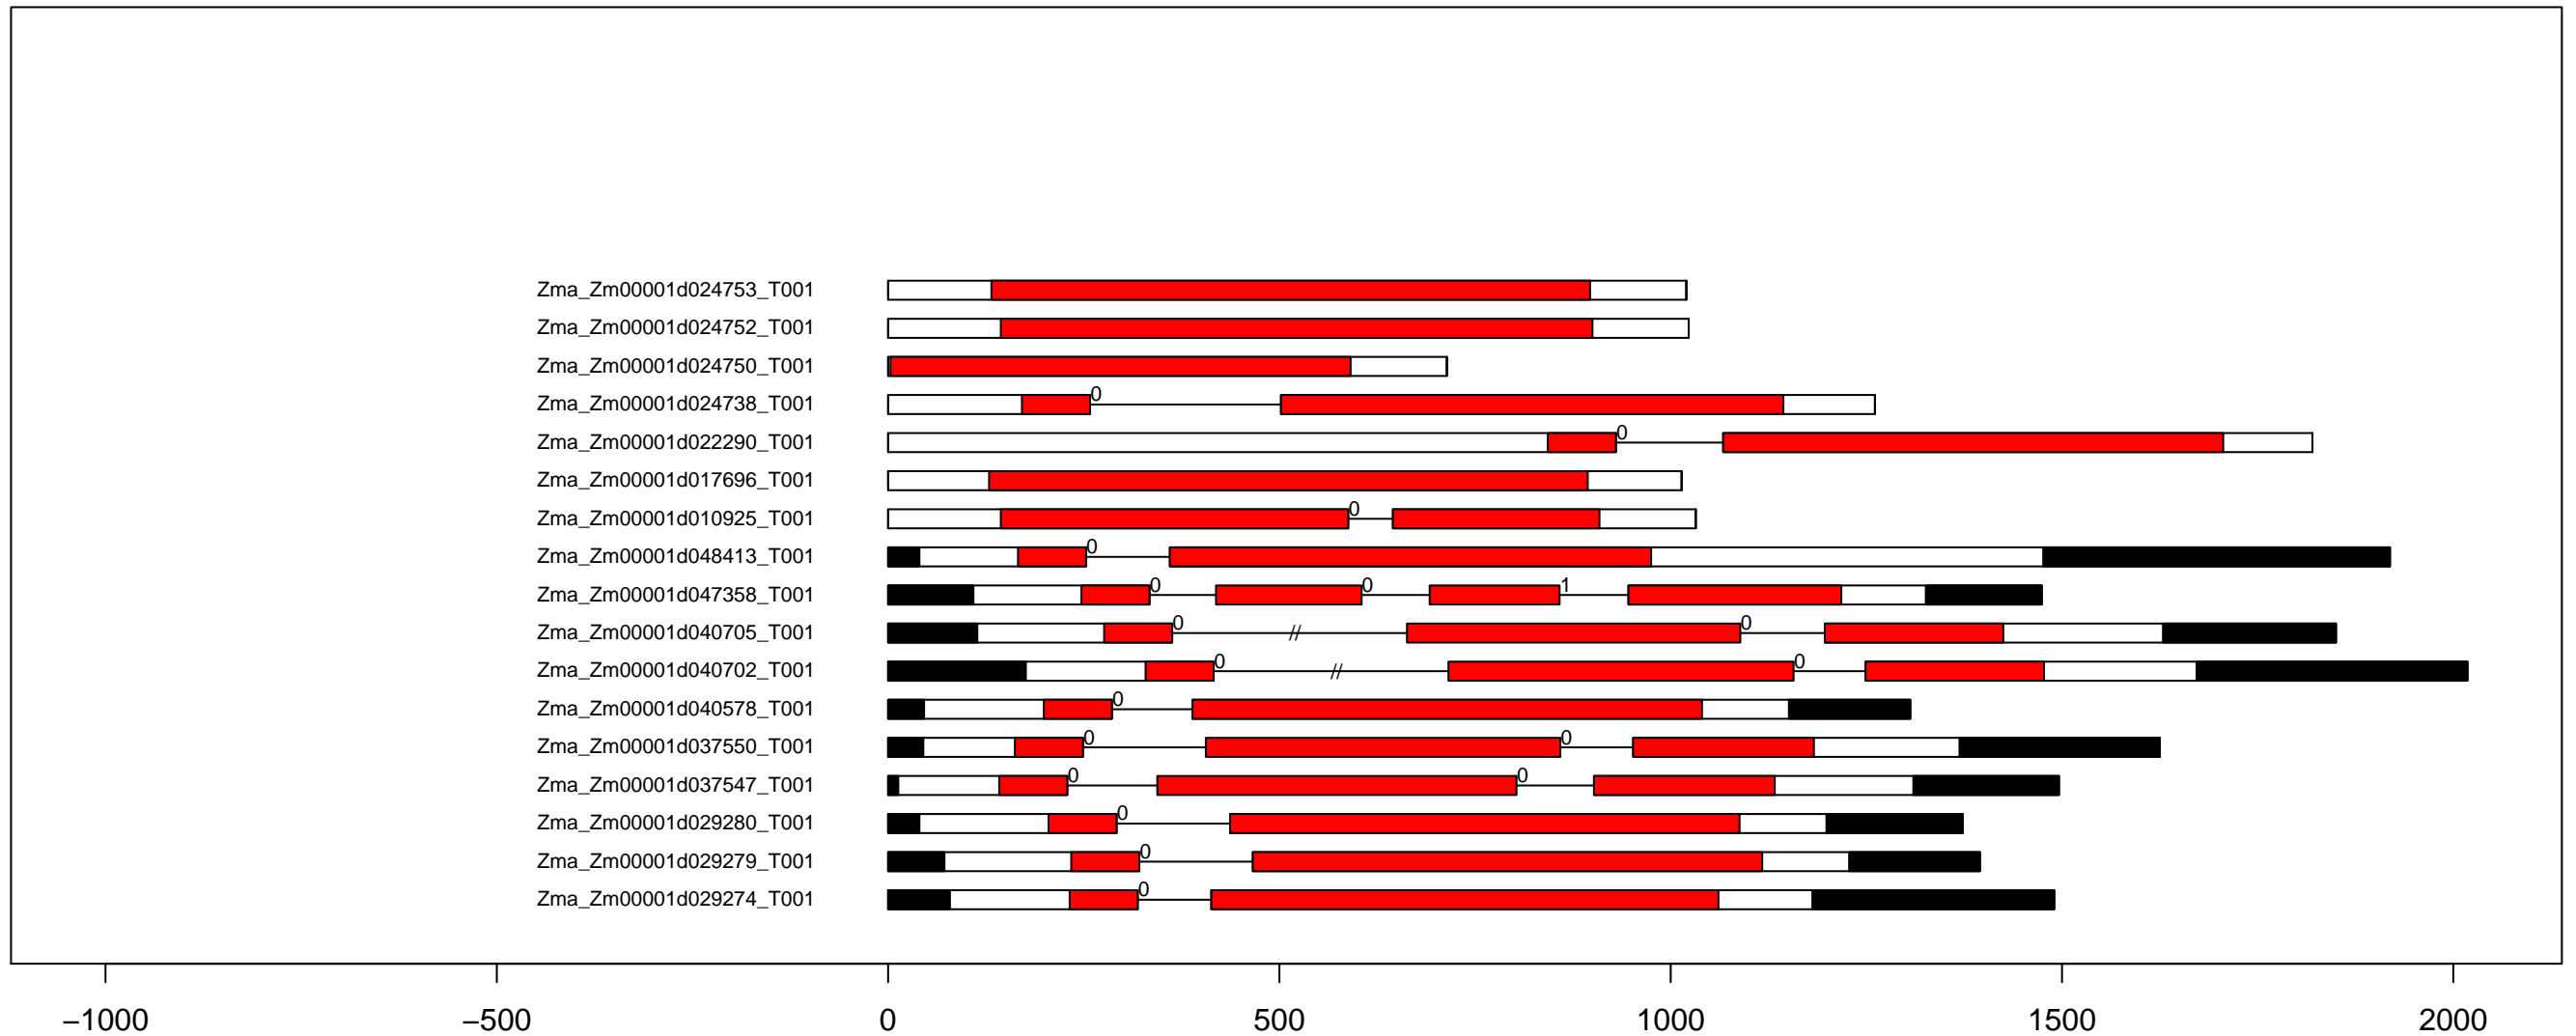

# Z.ma class III peroxidase II subfamily exon-intron and prx domain diagram (all)

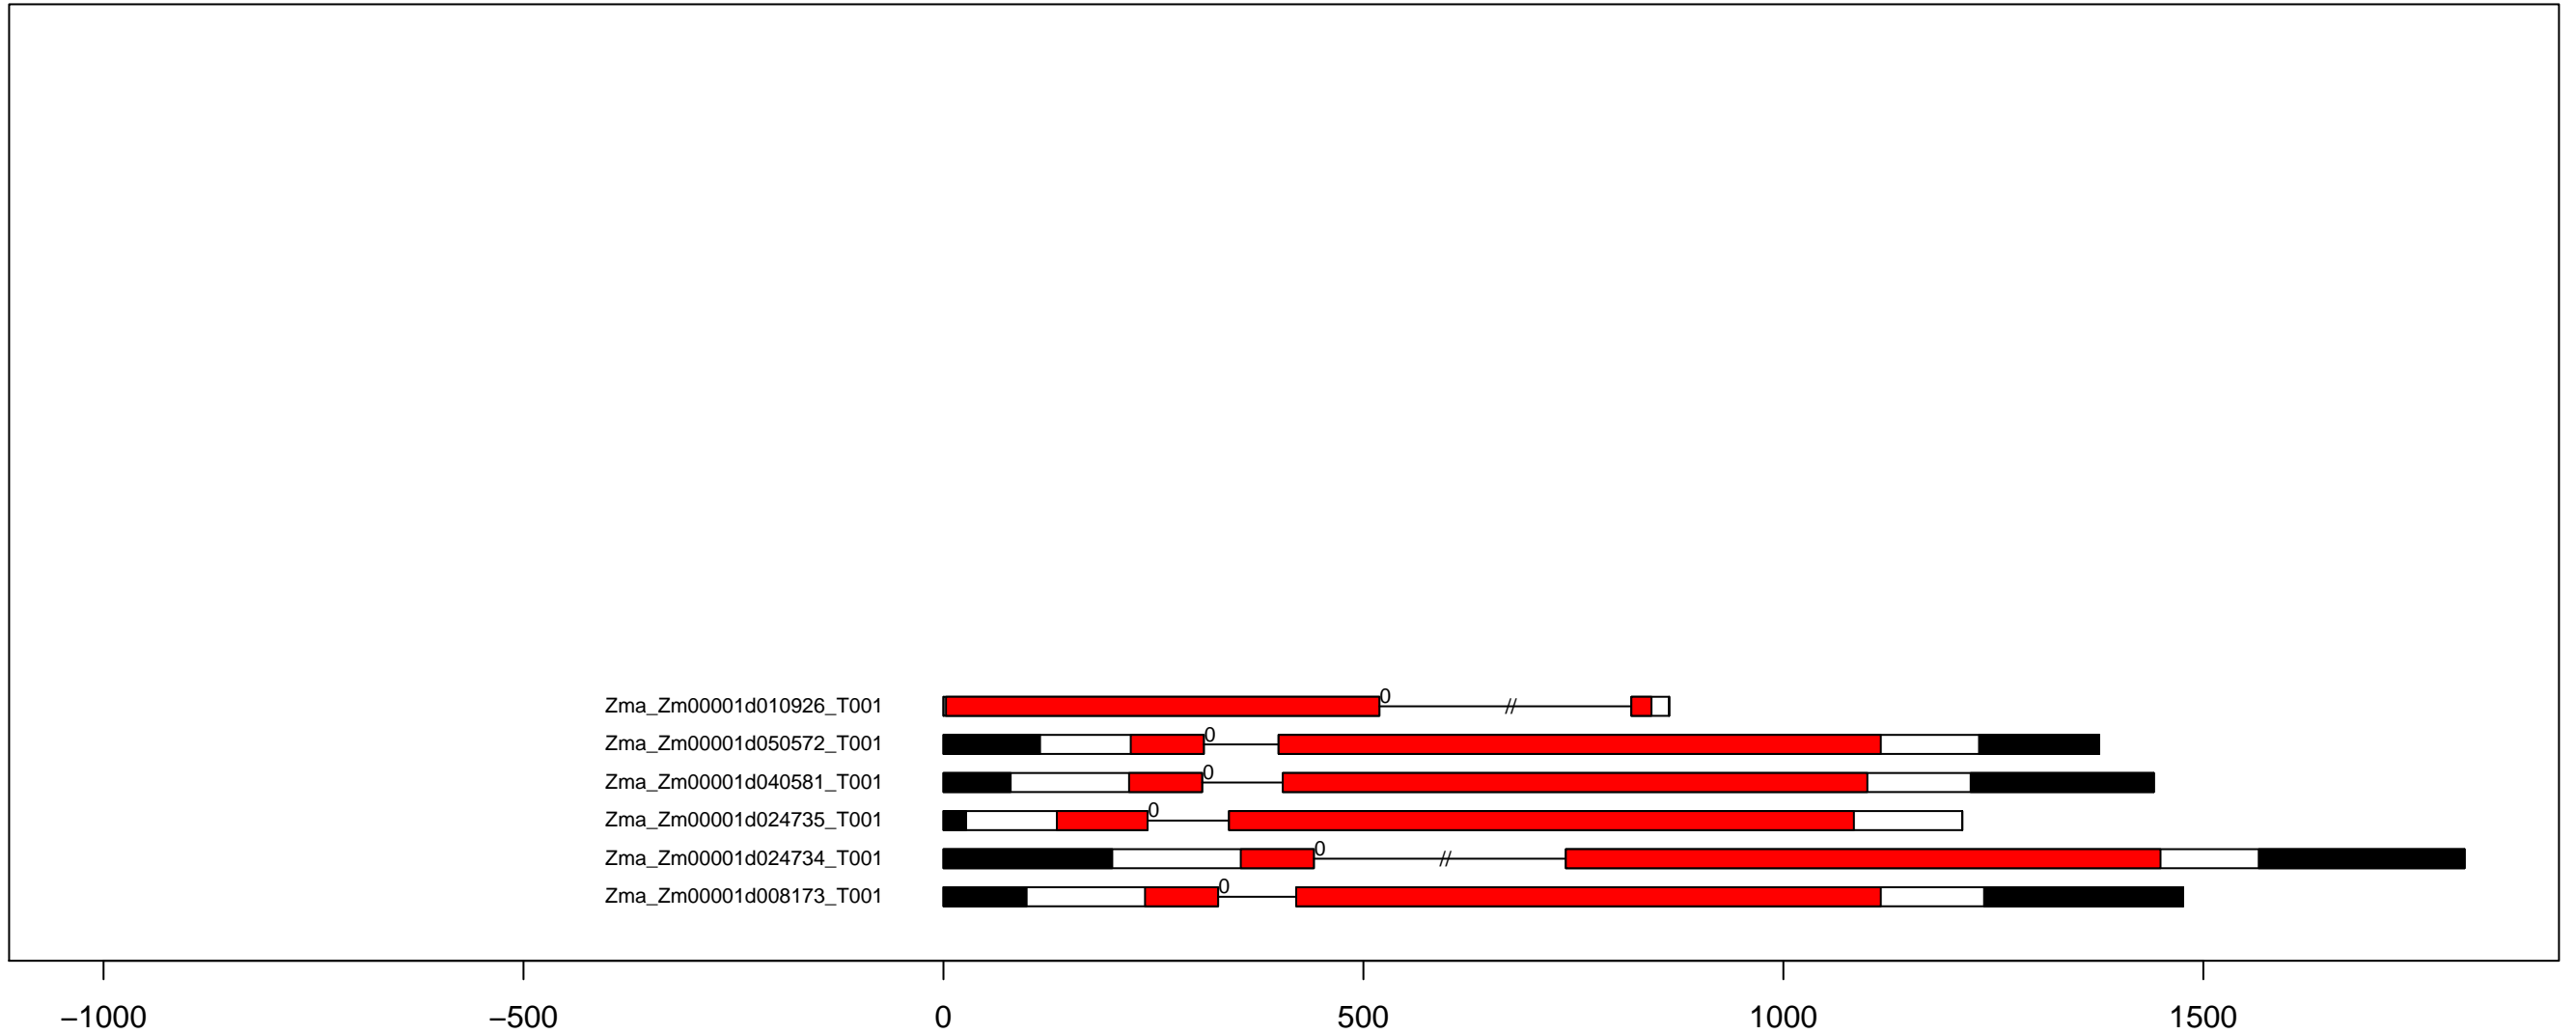

### Z.ma class III peroxidase V subfamily exon-intron and prx domain diagram (part 1)

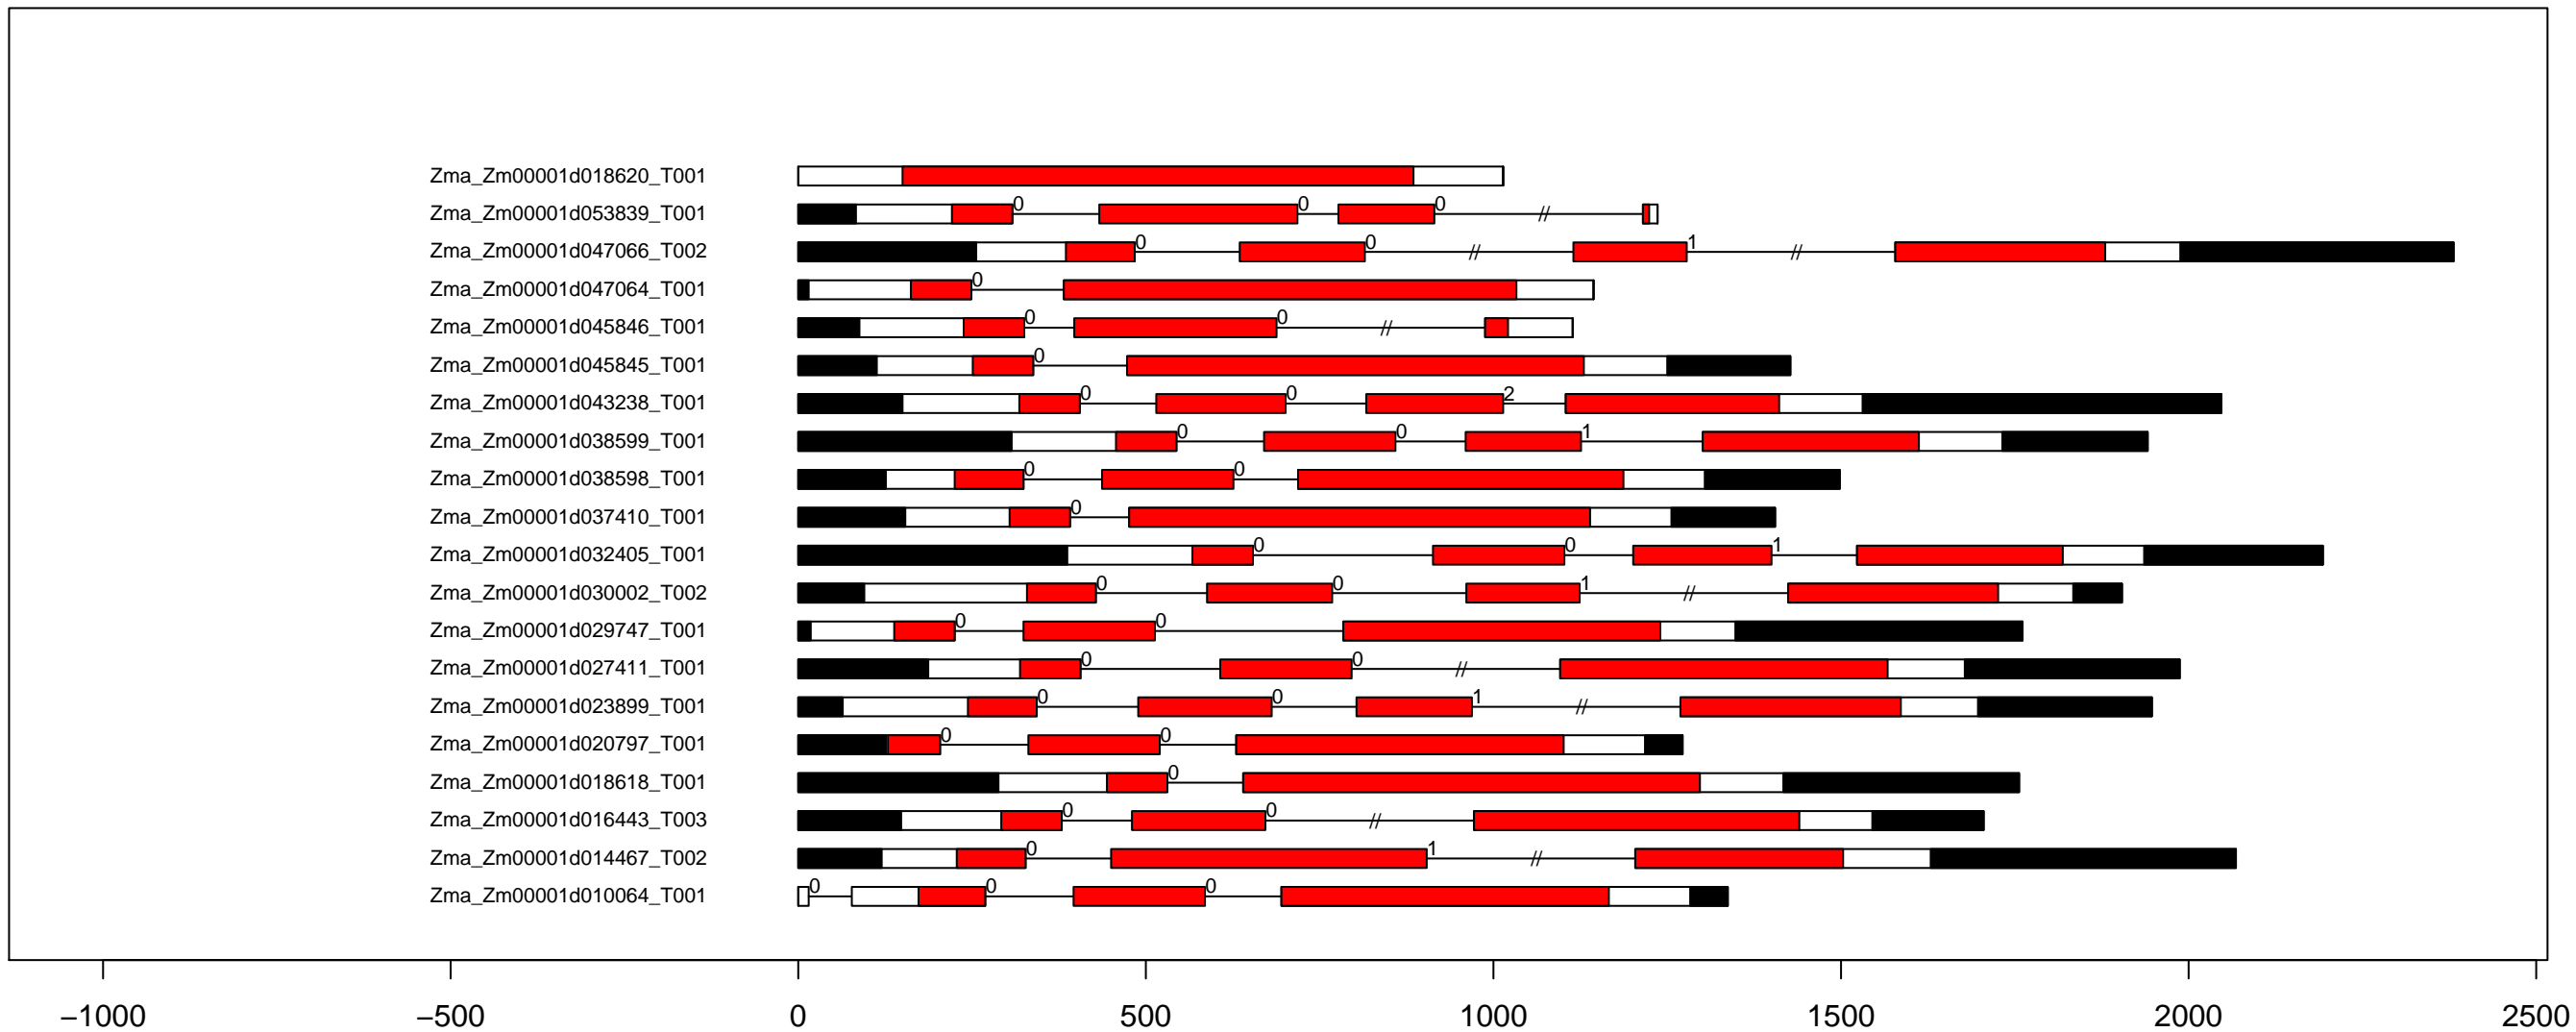

# Z.ma class III peroxidase V subfamily exon-intron and prx domain diagram (part 2)

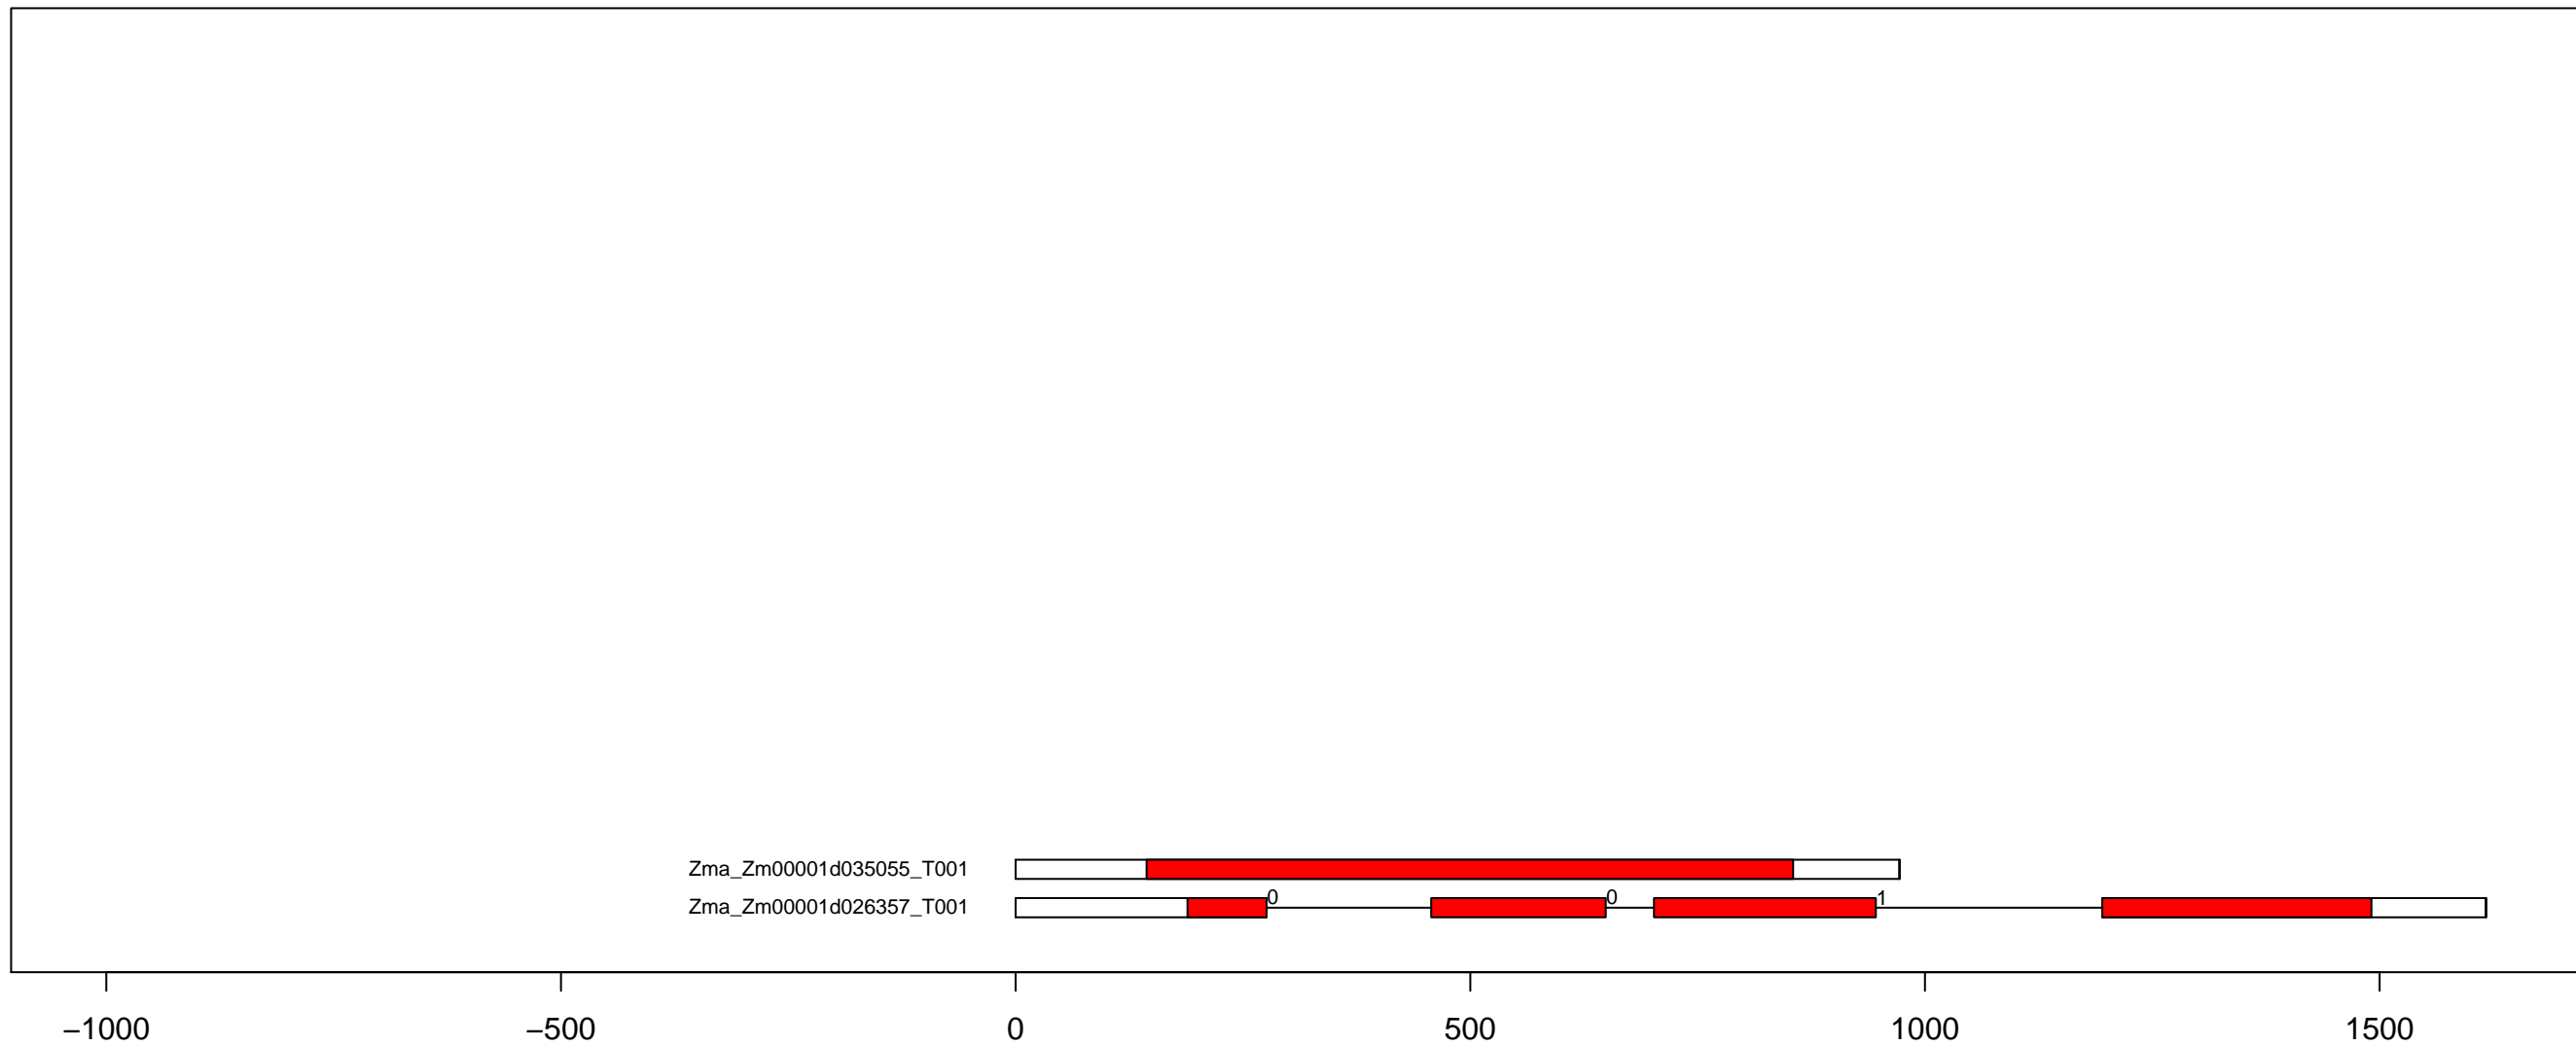



# Z.ma class III peroxidase VI subfamily exon-intron and prx domain diagram (all)

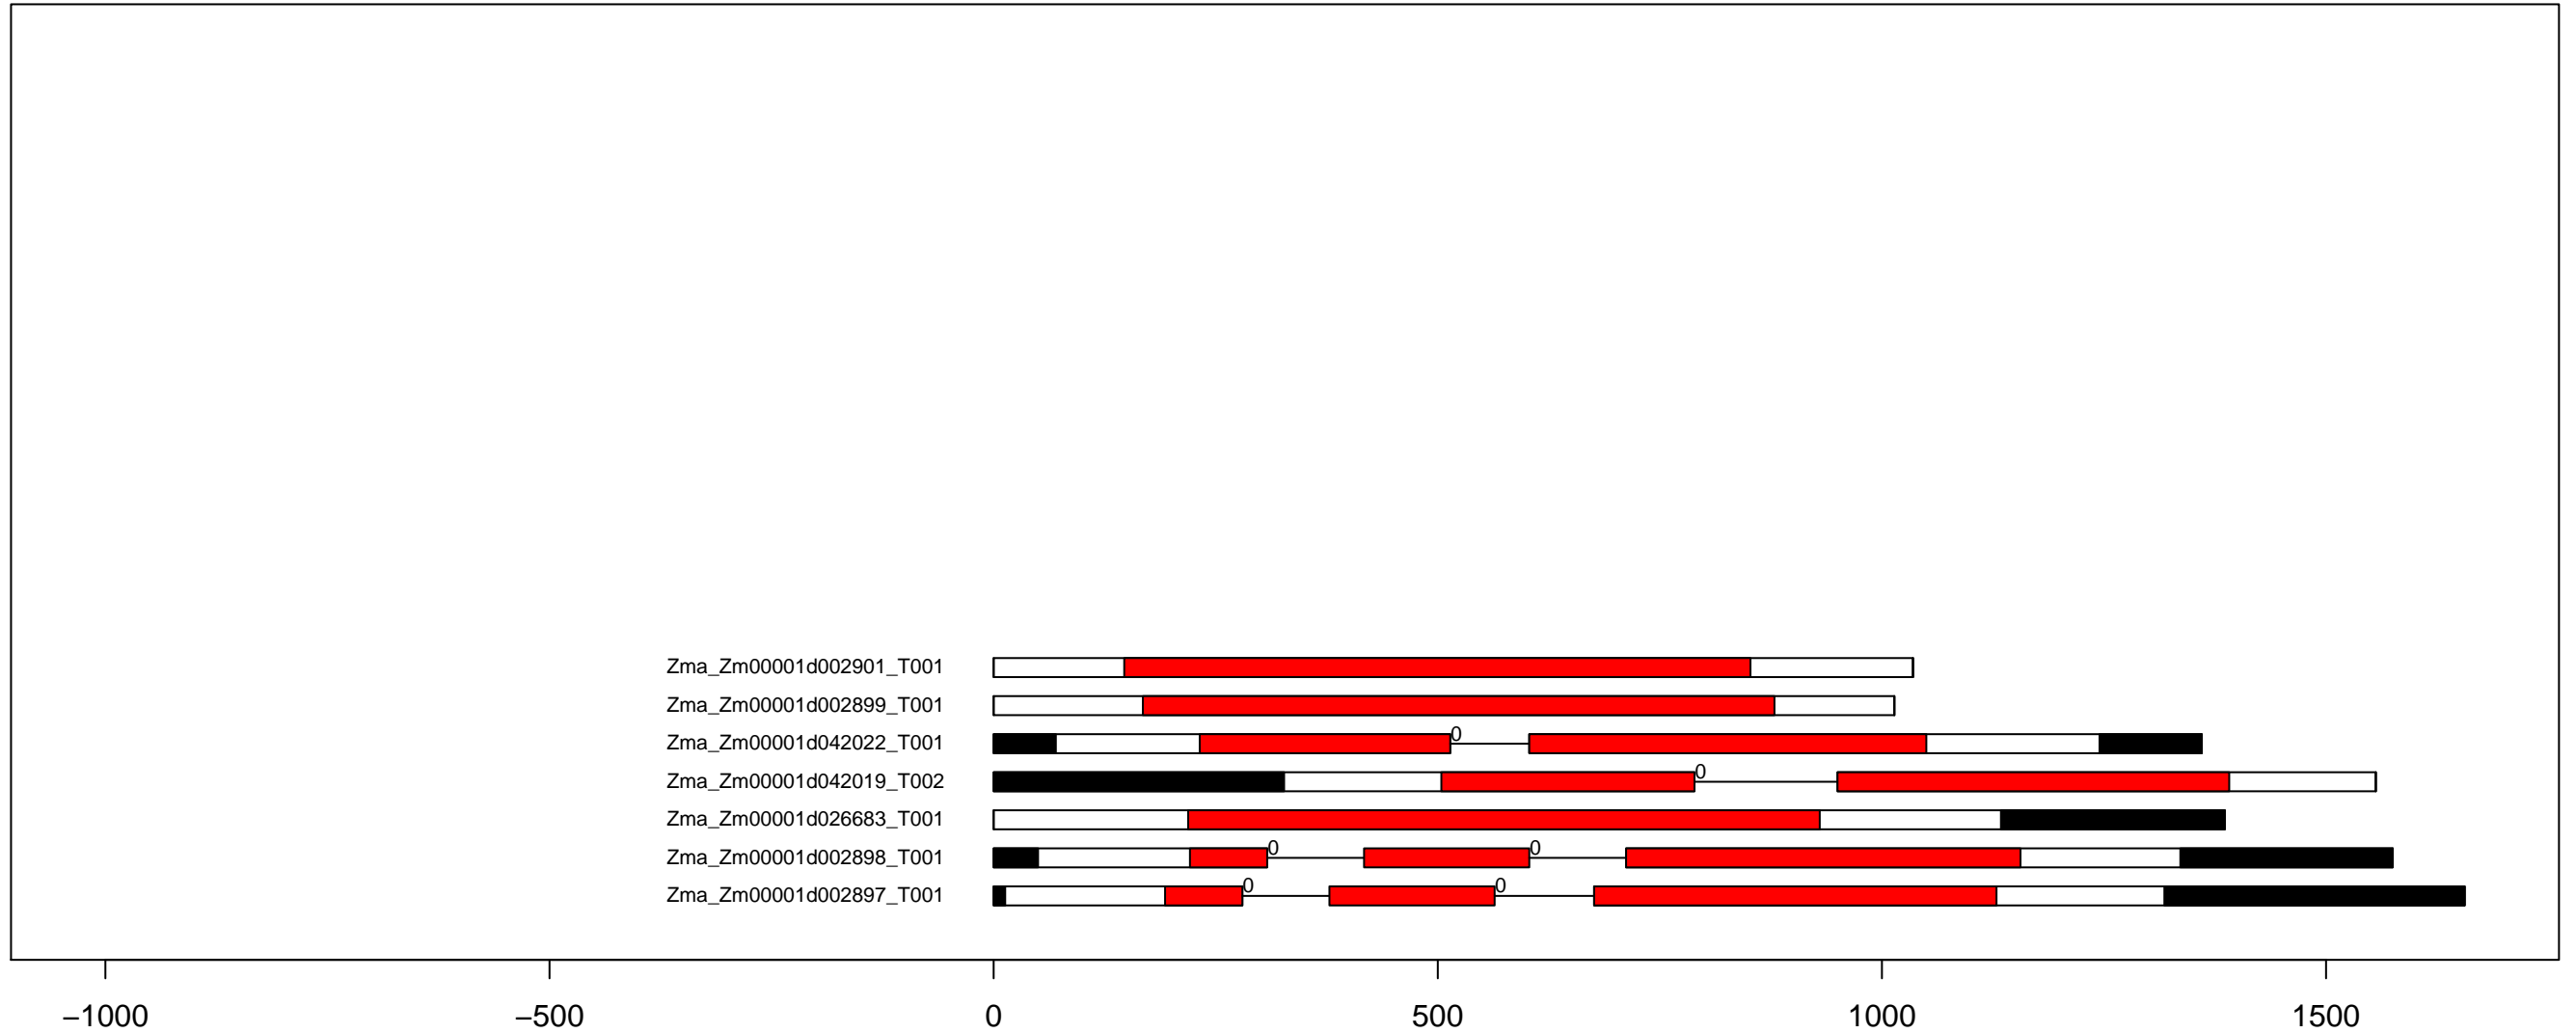

### Z.ma class III peroxidase VII subfamily exon-intron and prx domain diagram (all)

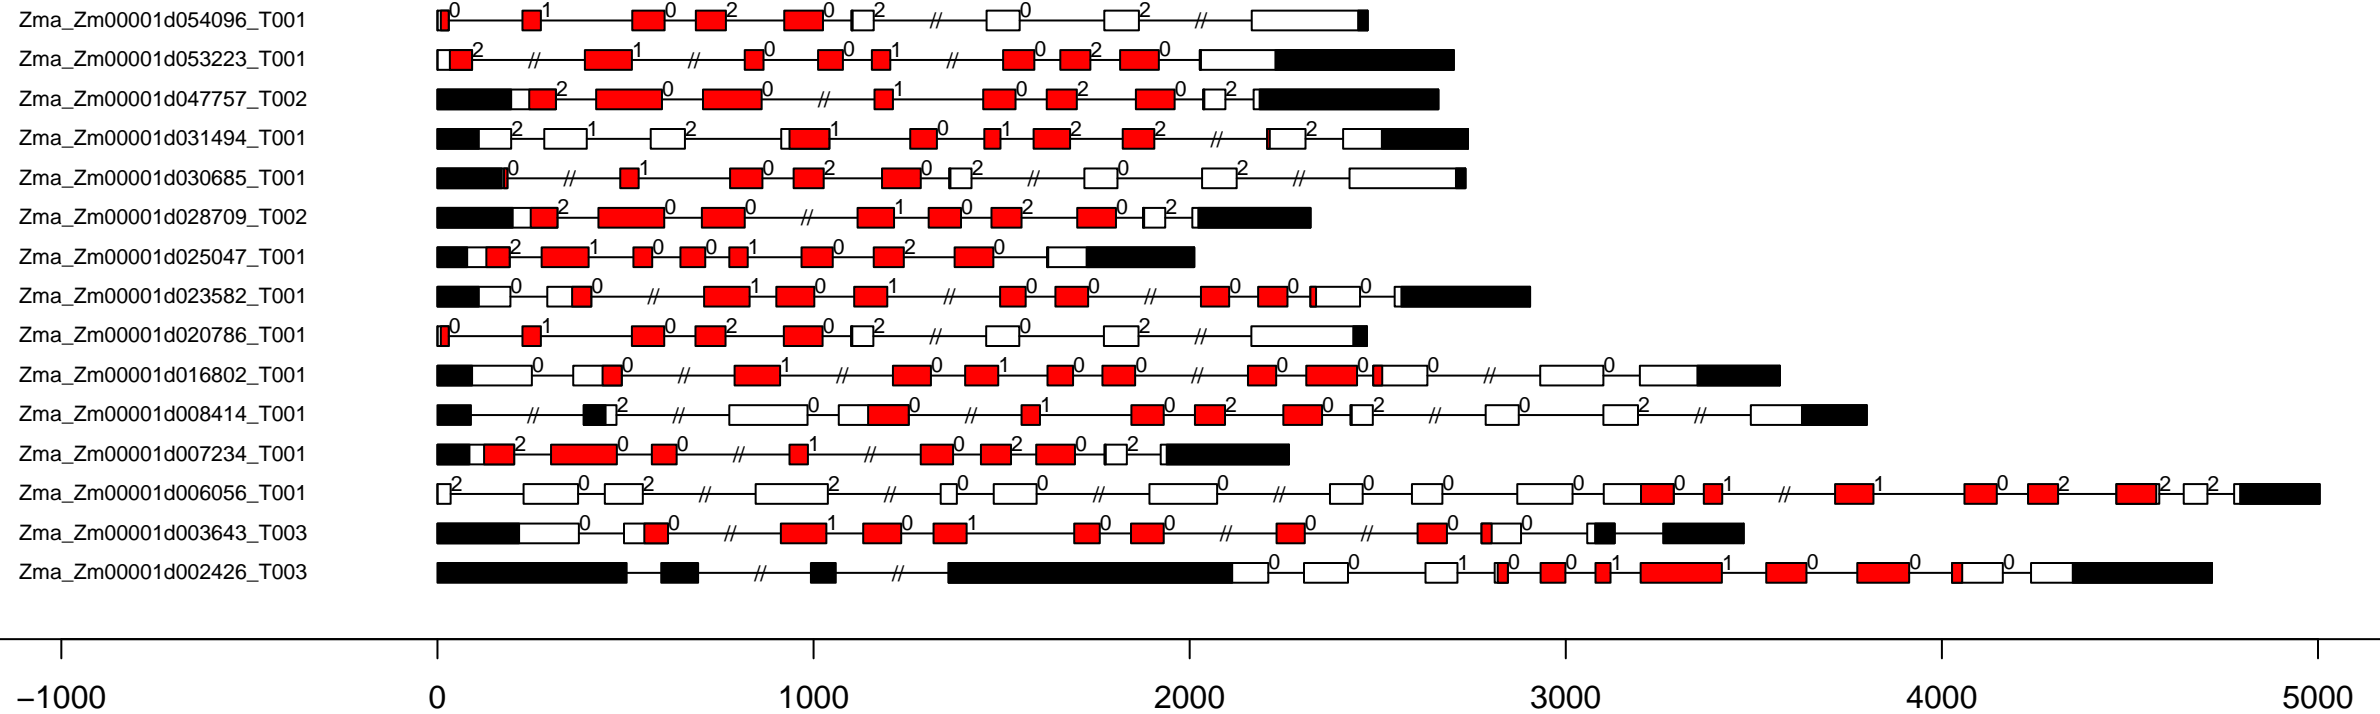

### Z.ma class III peroxidase IX subfamily exon-intron and prx domain diagram (all)

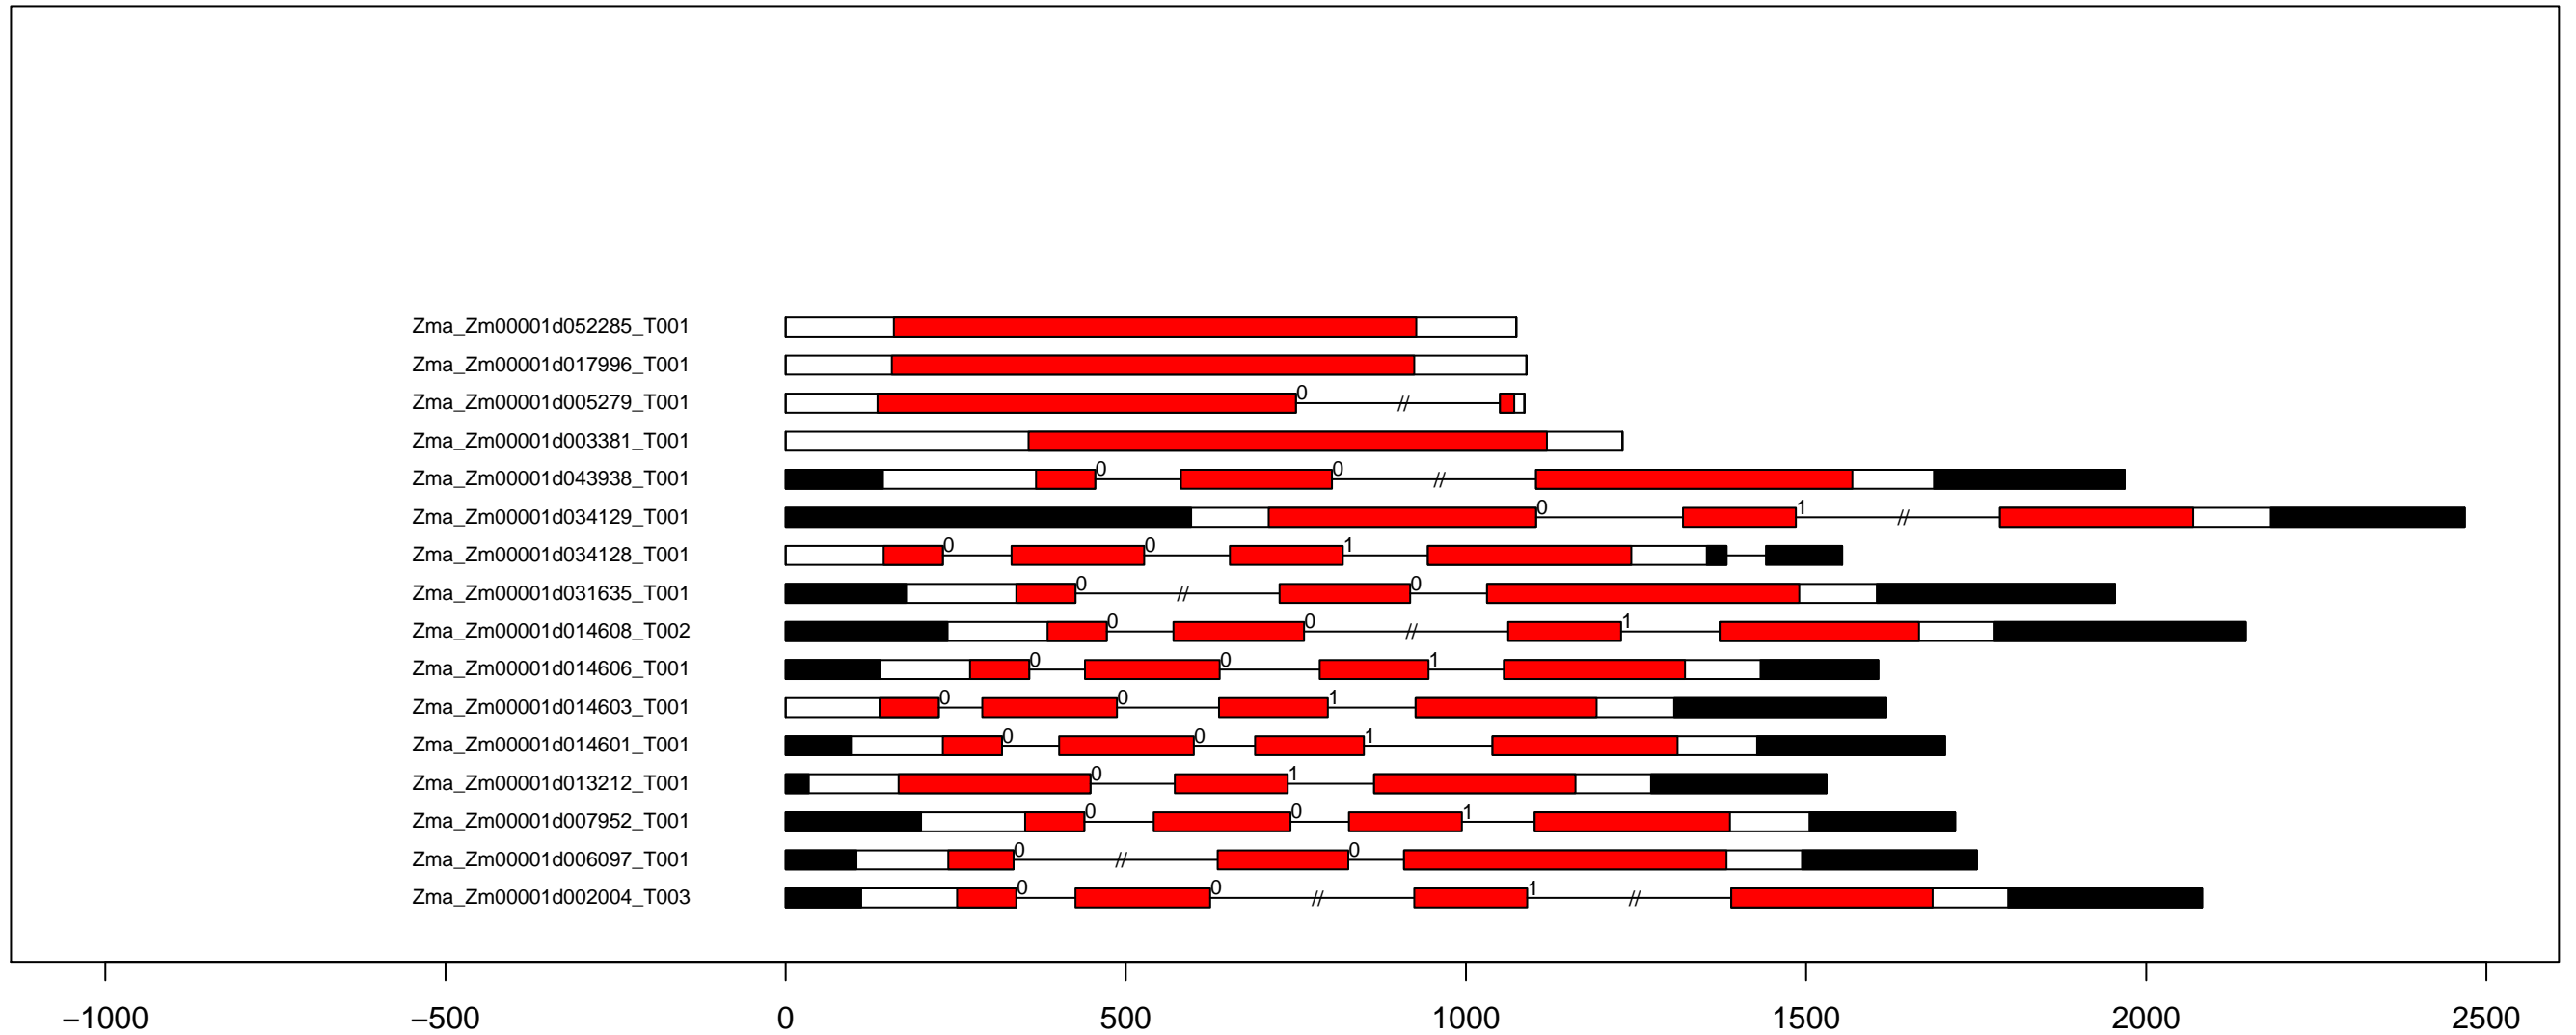

# Z.ma class III peroxidase X subfamily exon-intron and prx domain diagram (all)

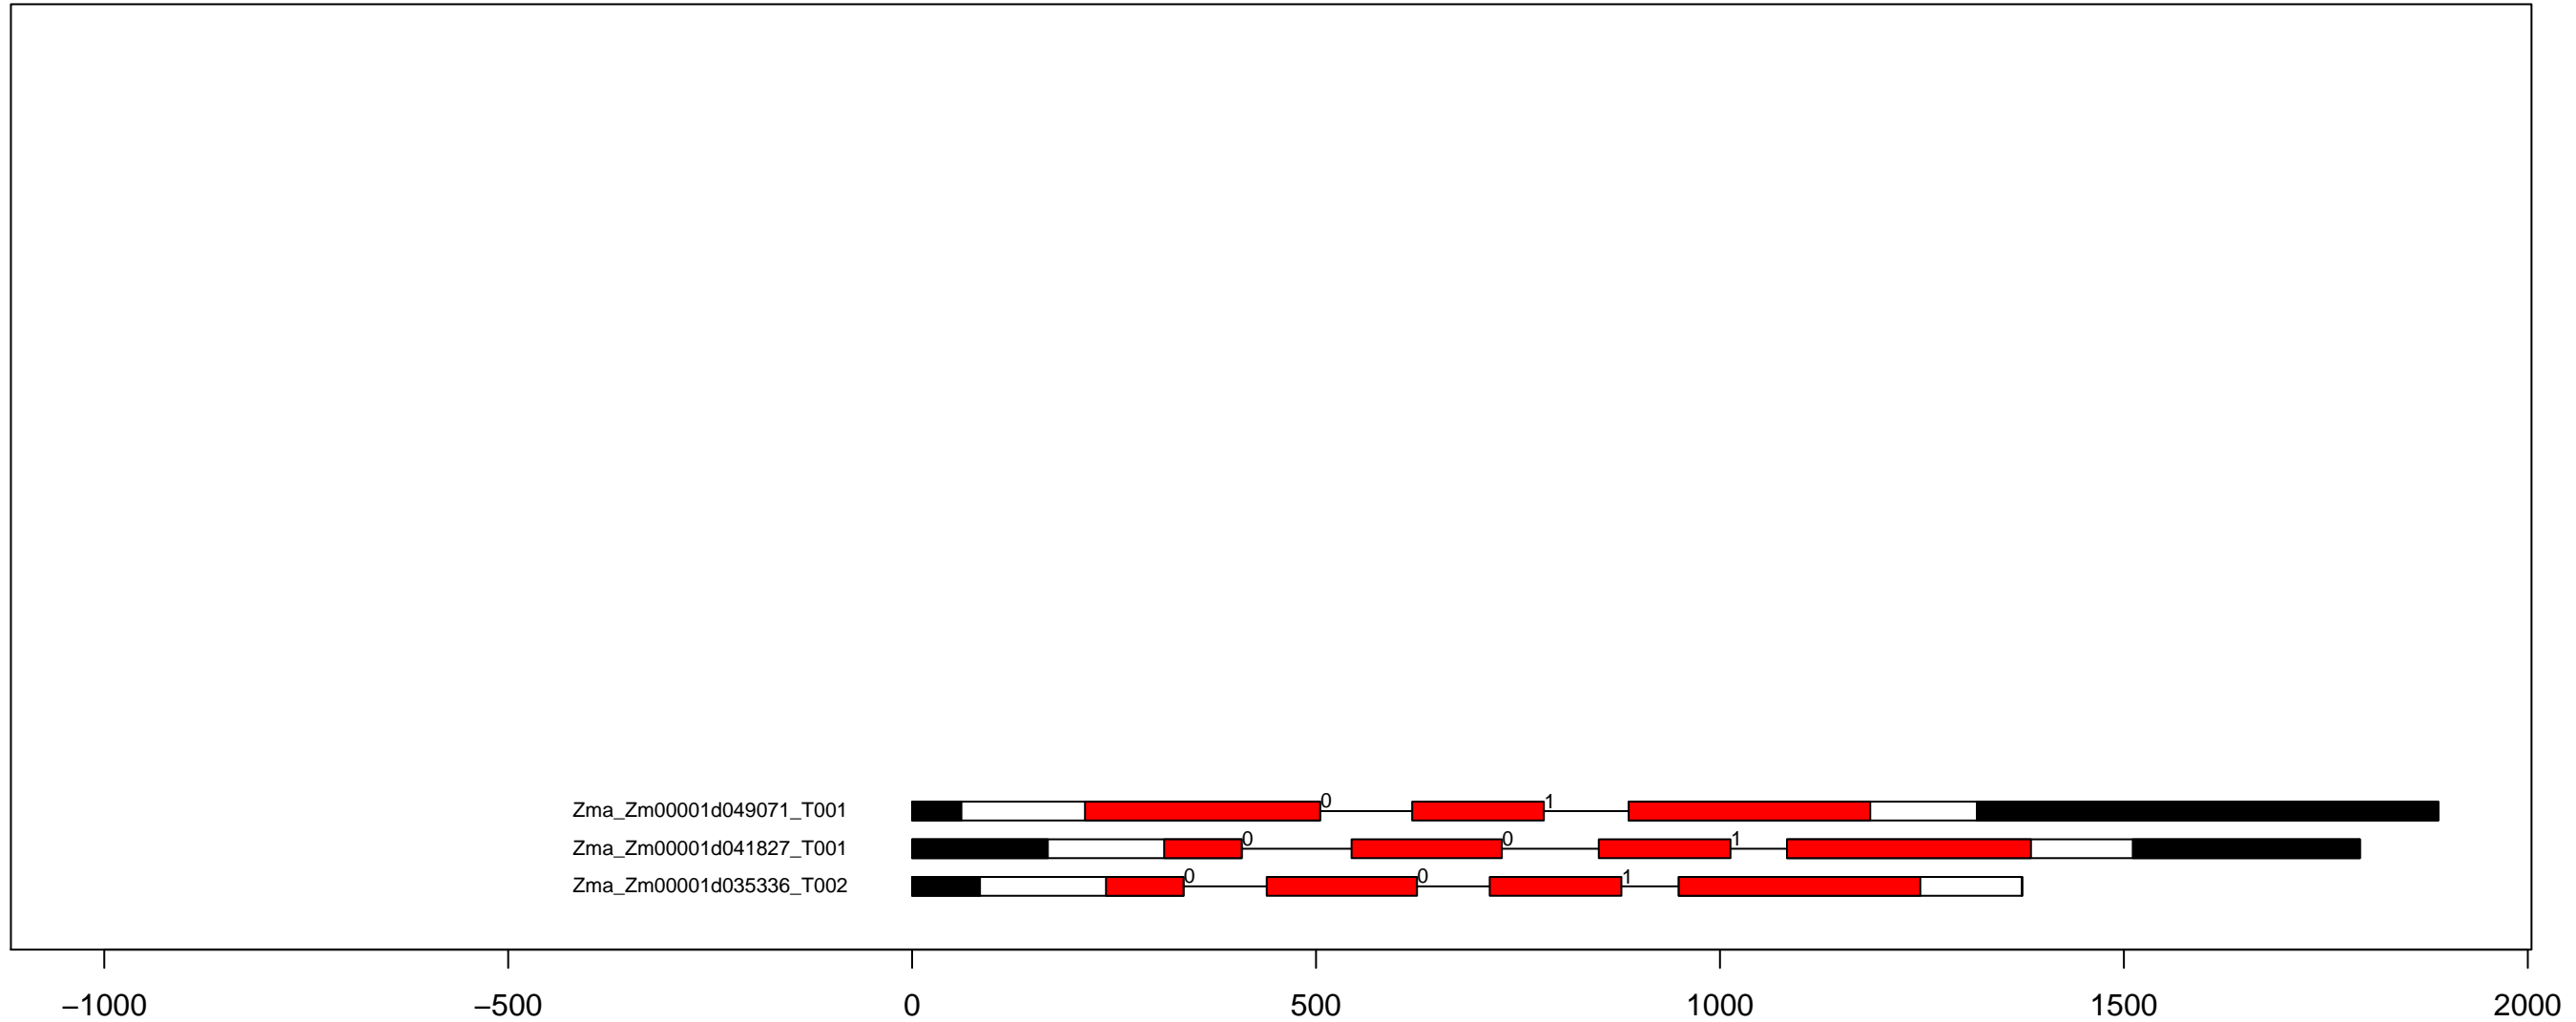

# Z.ma class III peroxidase XII subfamily exon-intron and prx domain diagram (all)

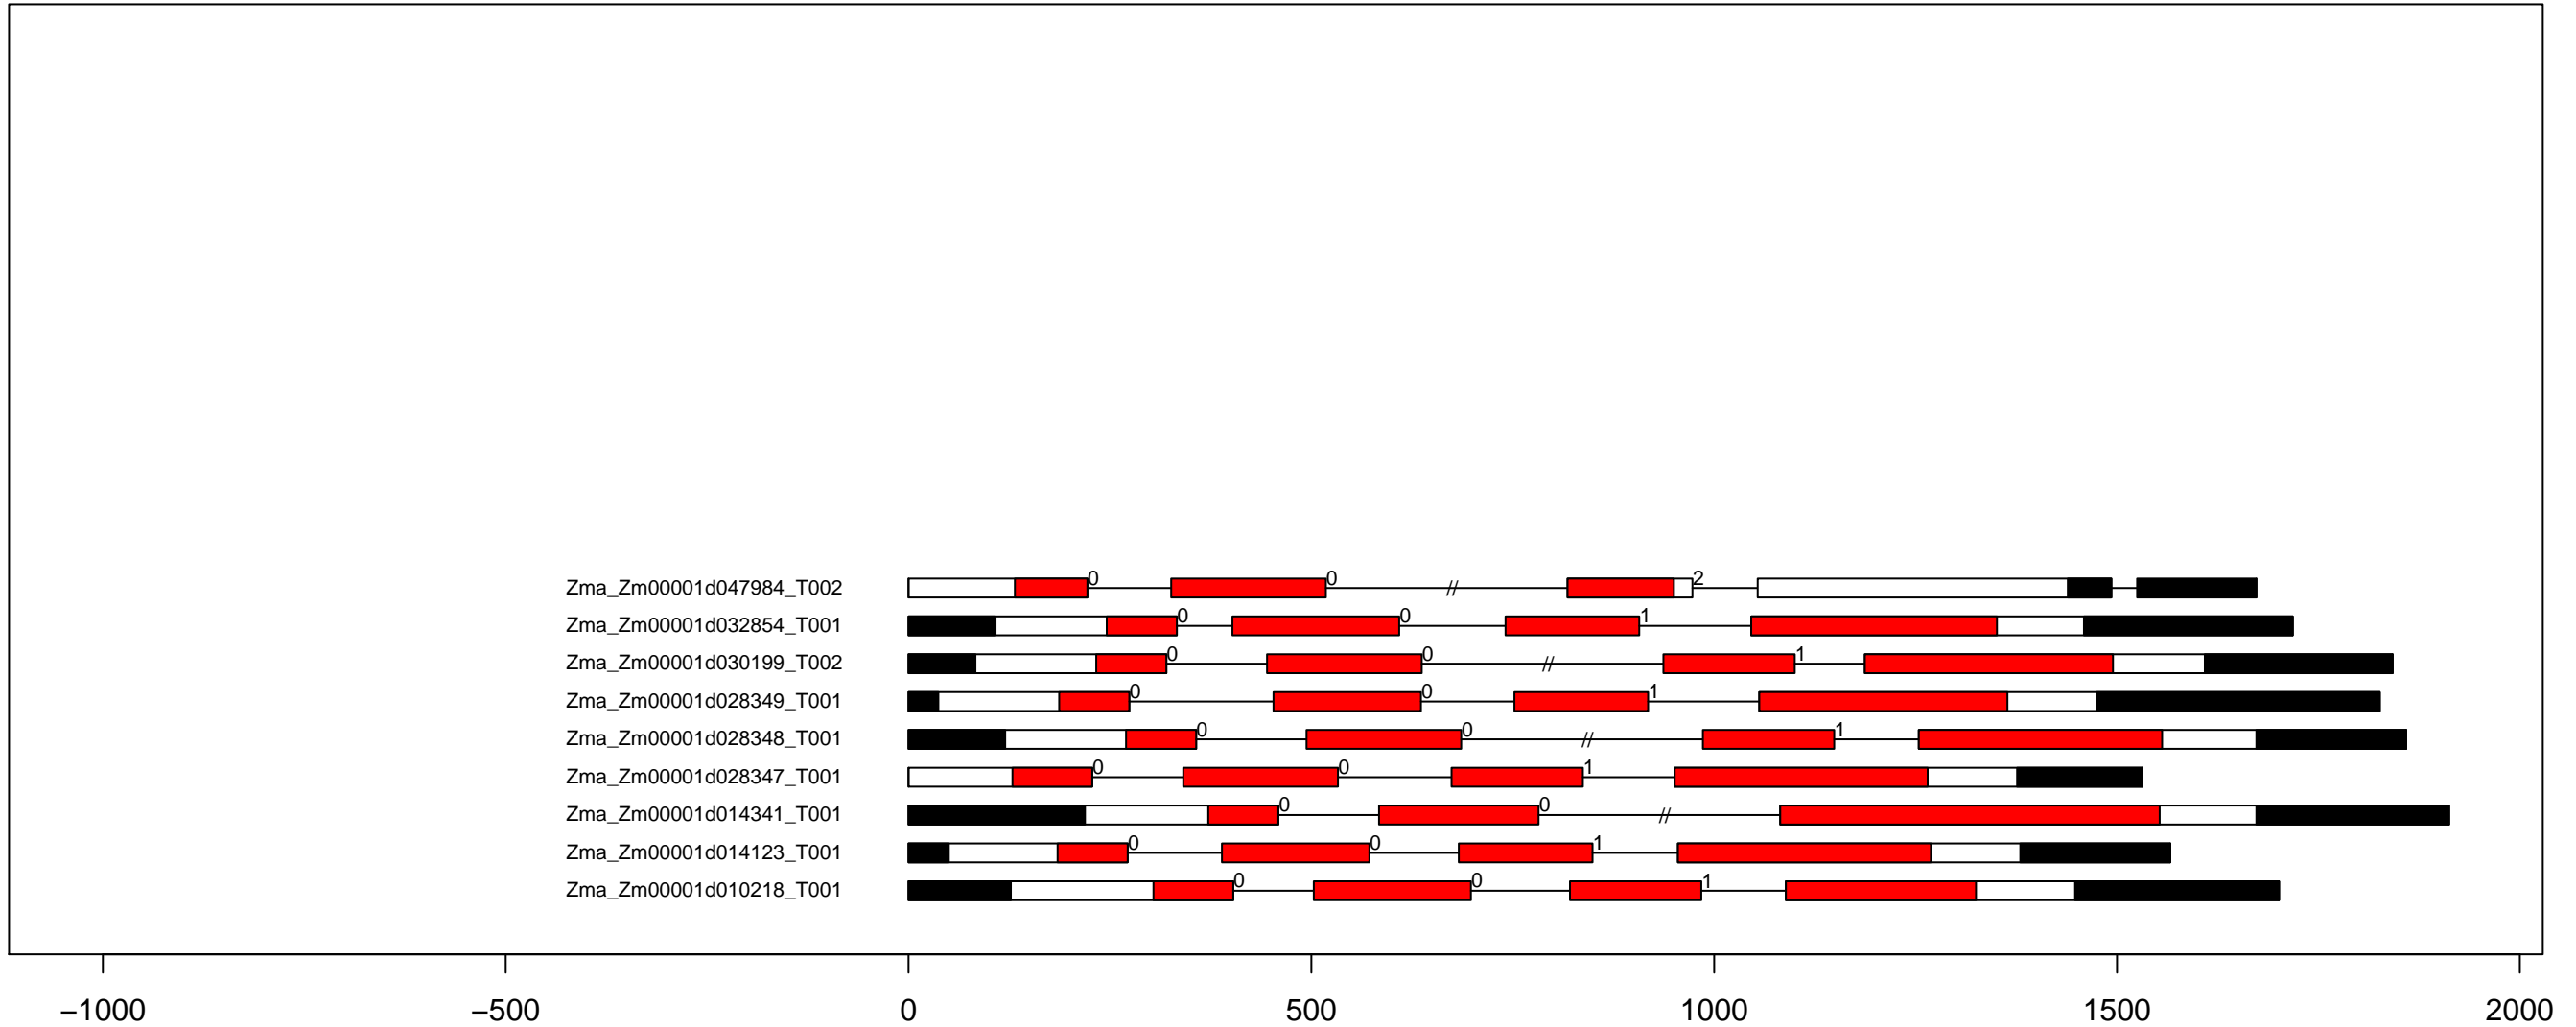

# Z.ma class III peroxidase XIV subfamily exon-intron and prx domain diagram (all)

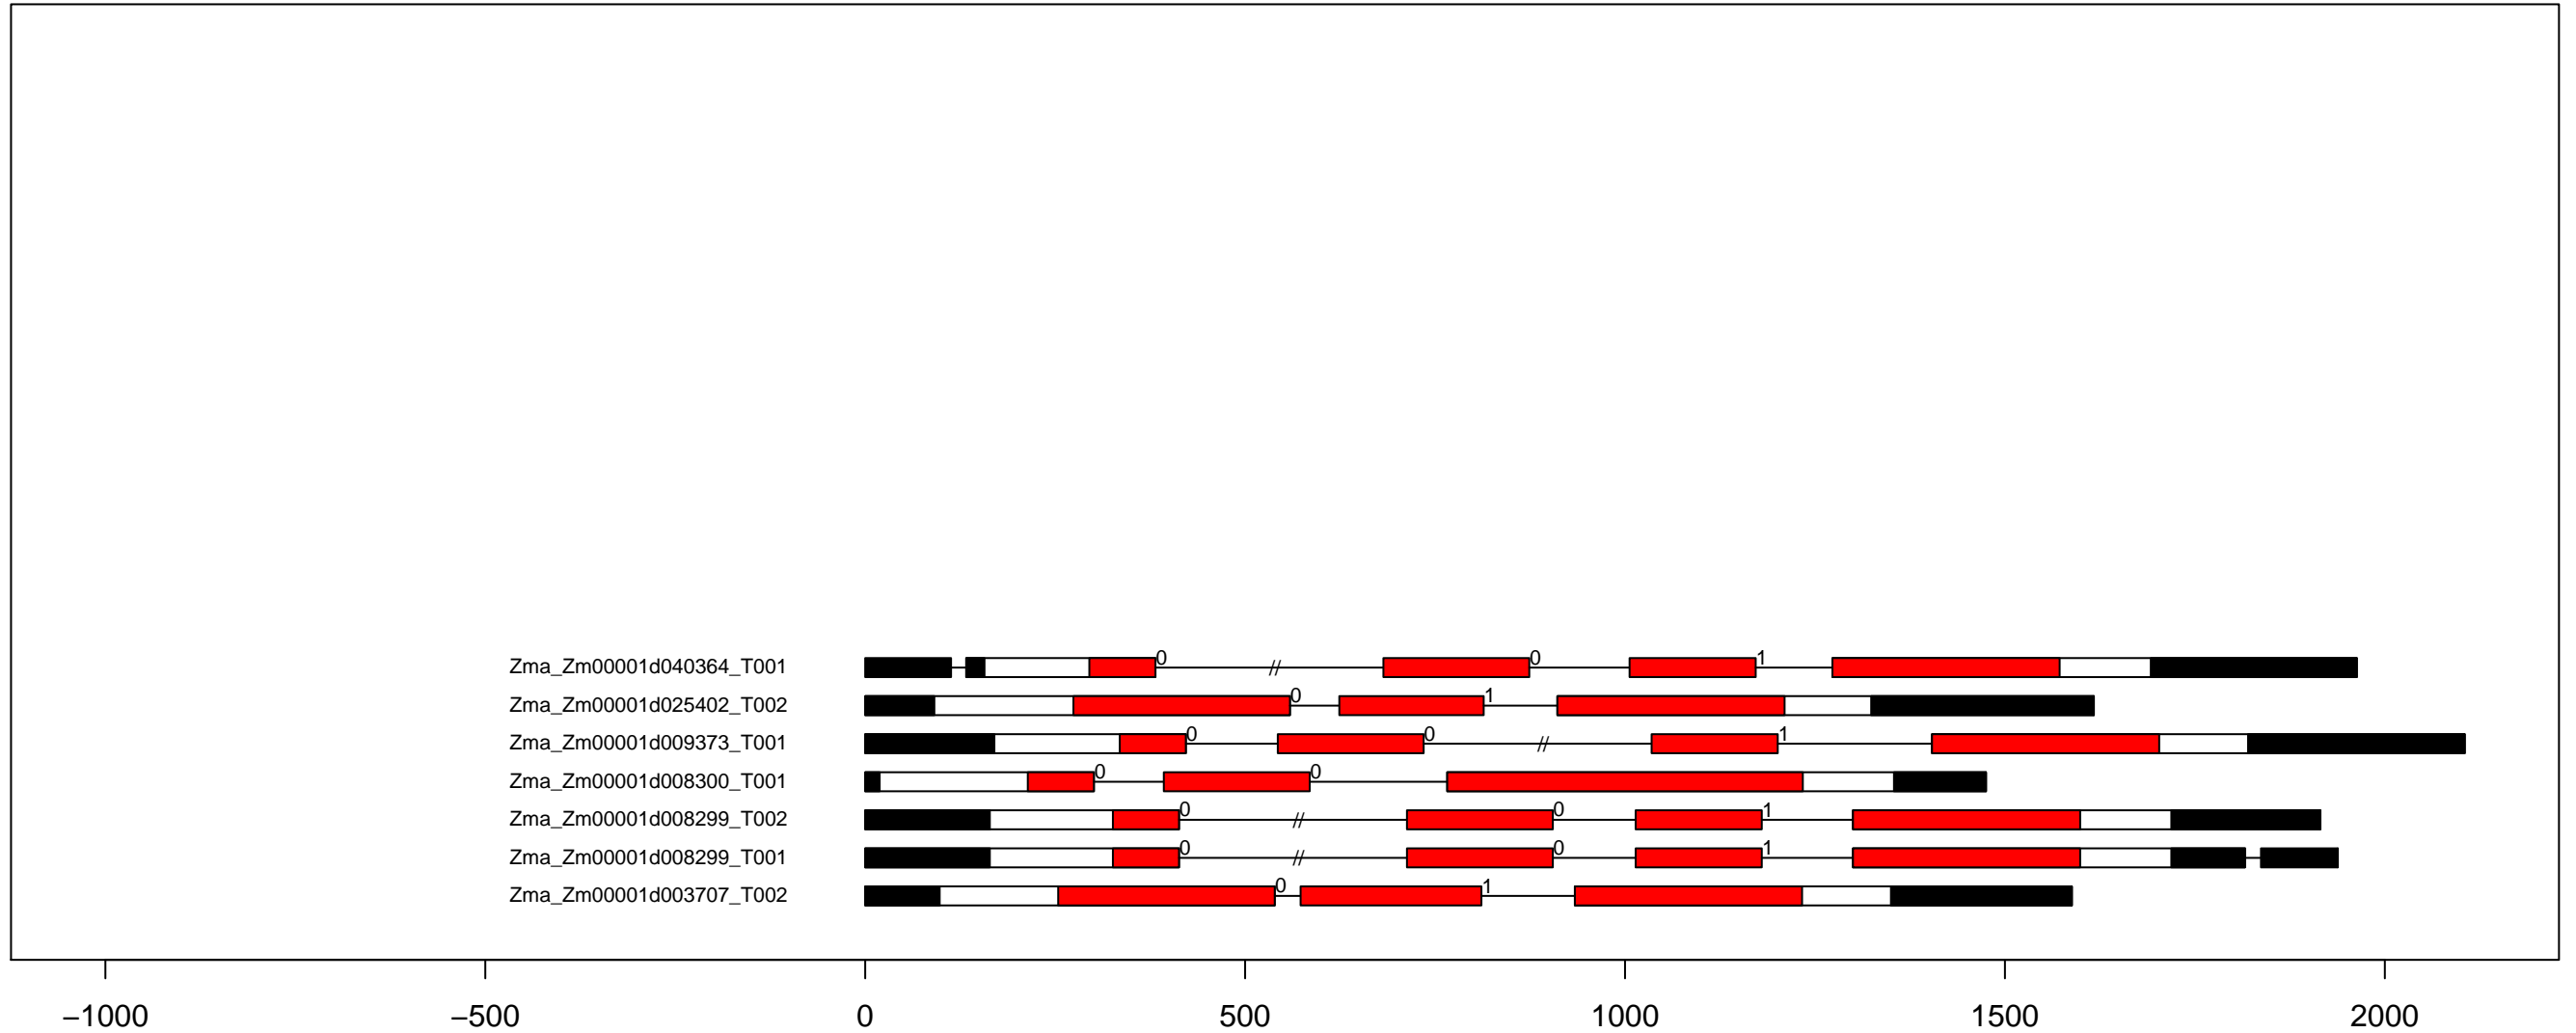

# Z.ma class III peroxidase XV subfamily exon-intron and prx domain diagram (all)

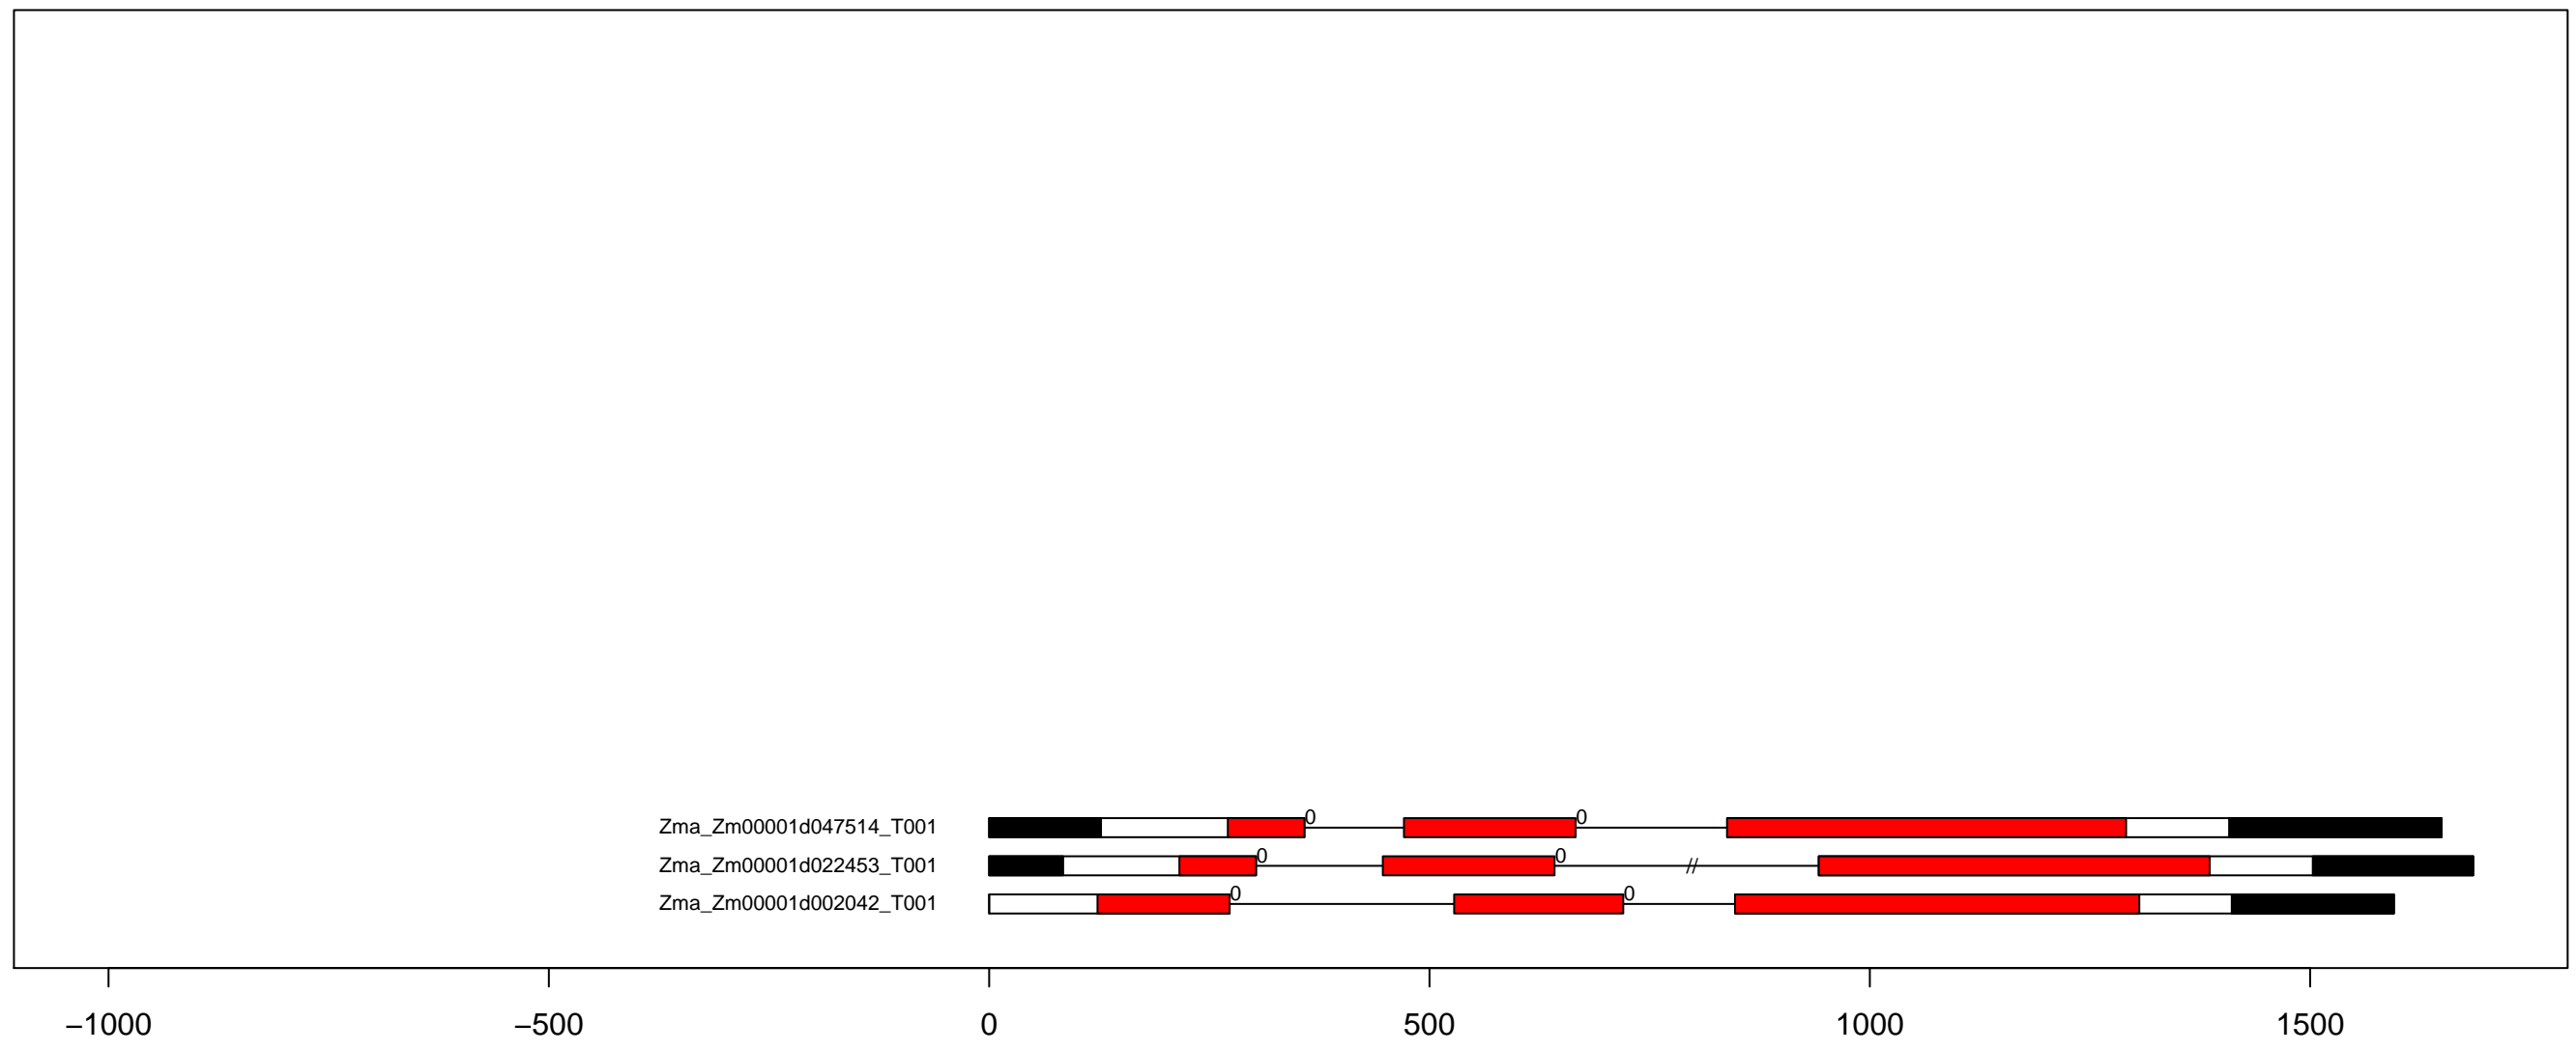

# Z.ma class III peroxidase XVI subfamily exon-intron and prx domain diagram (all)

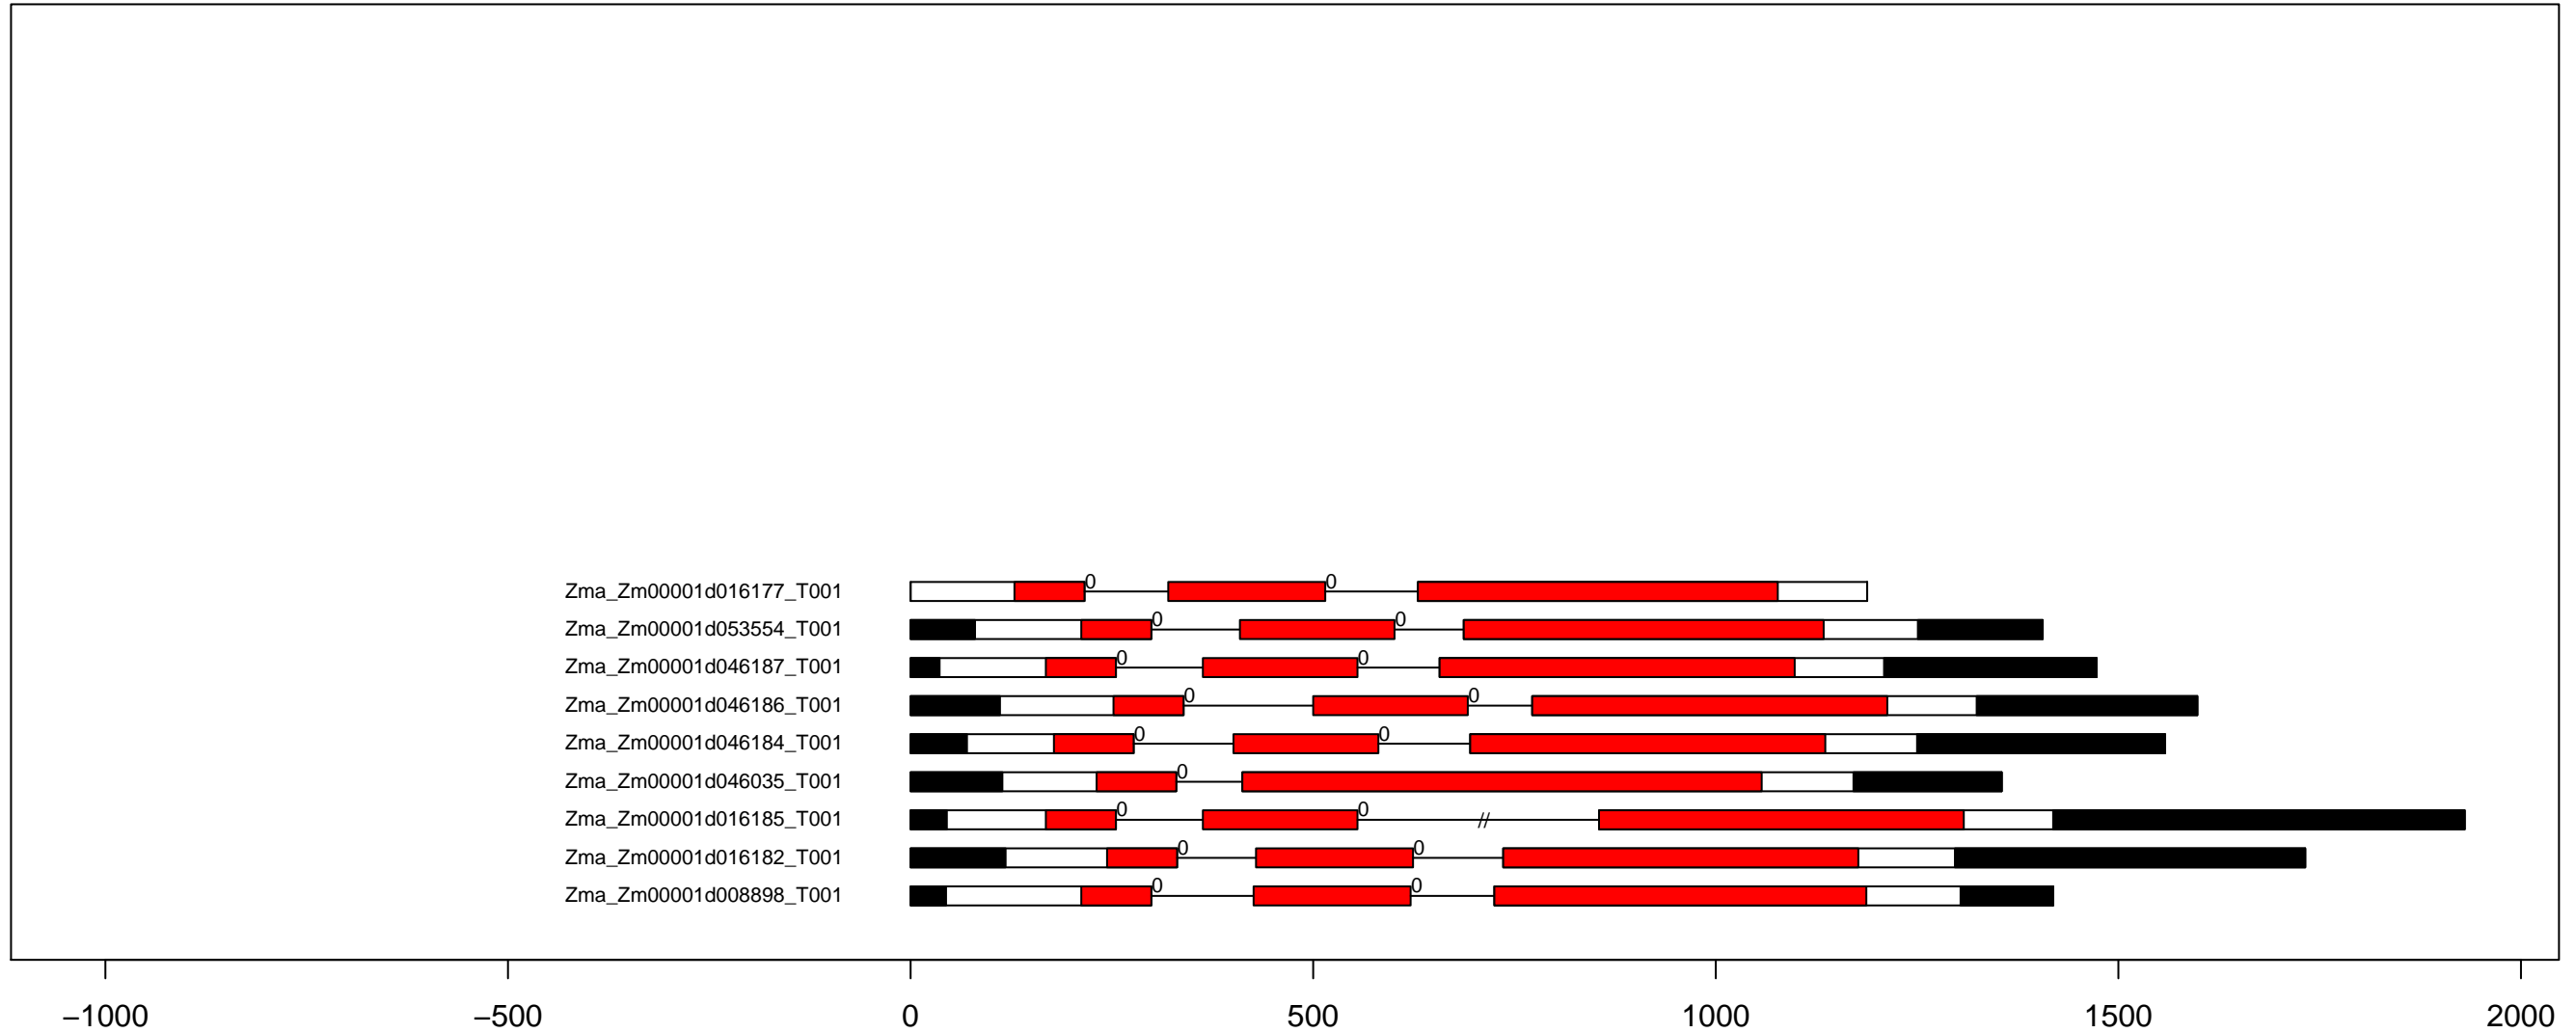



### Z.ma class III peroxidase XVII subfamily exon-intron and prx domain diagram (all)

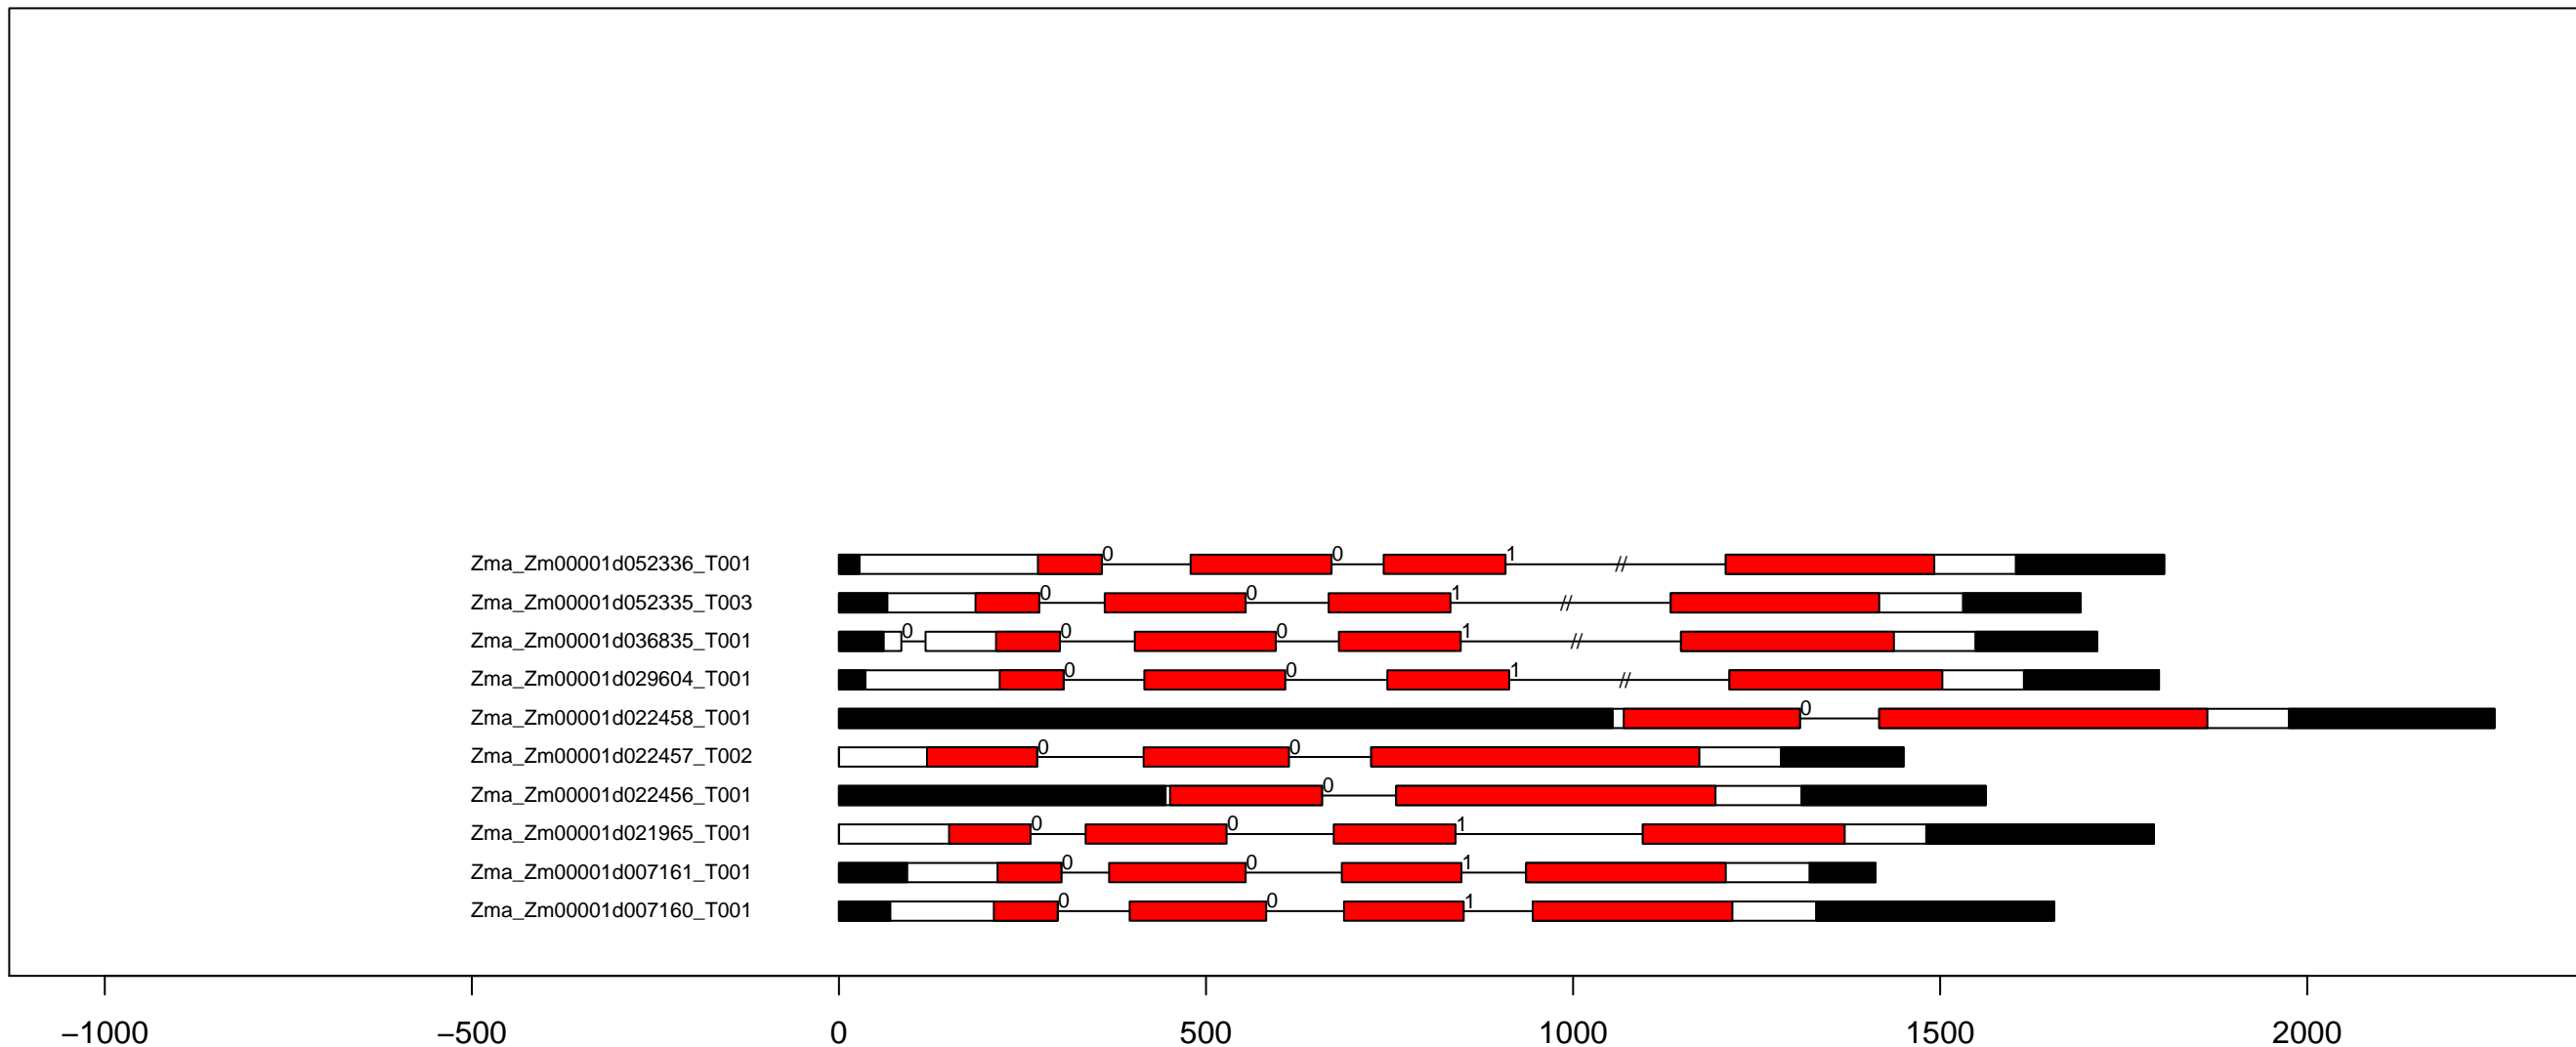

# Z.ma class III peroxidase XVIII subfamily exon-intron and prx domain diagram (all)

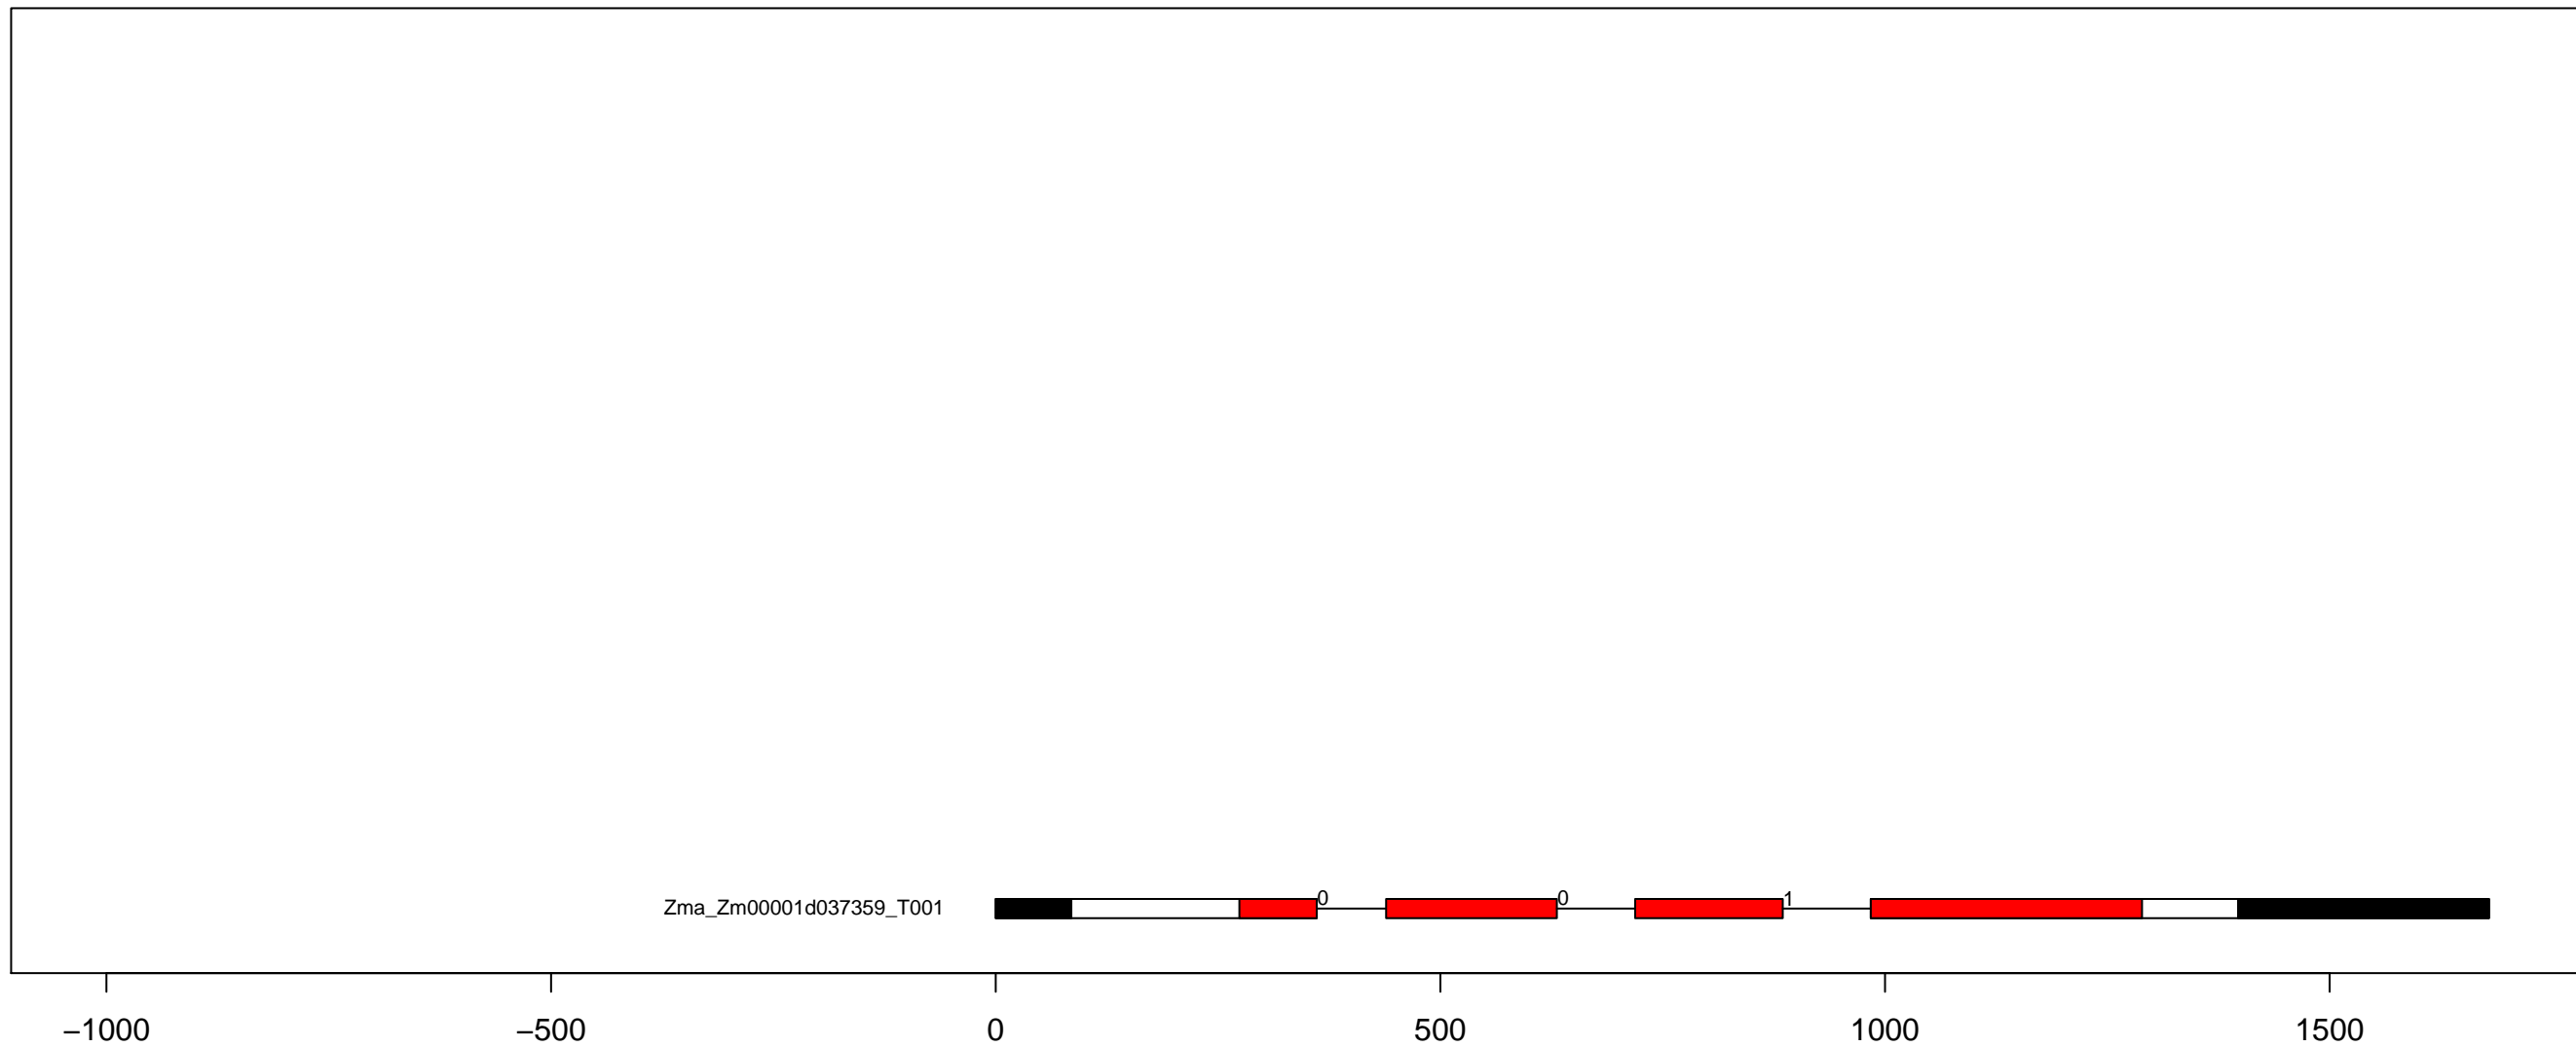

### Z.ma class III peroxidase unclear\_classification subfamily exon-intron and prx domain diagram (all)

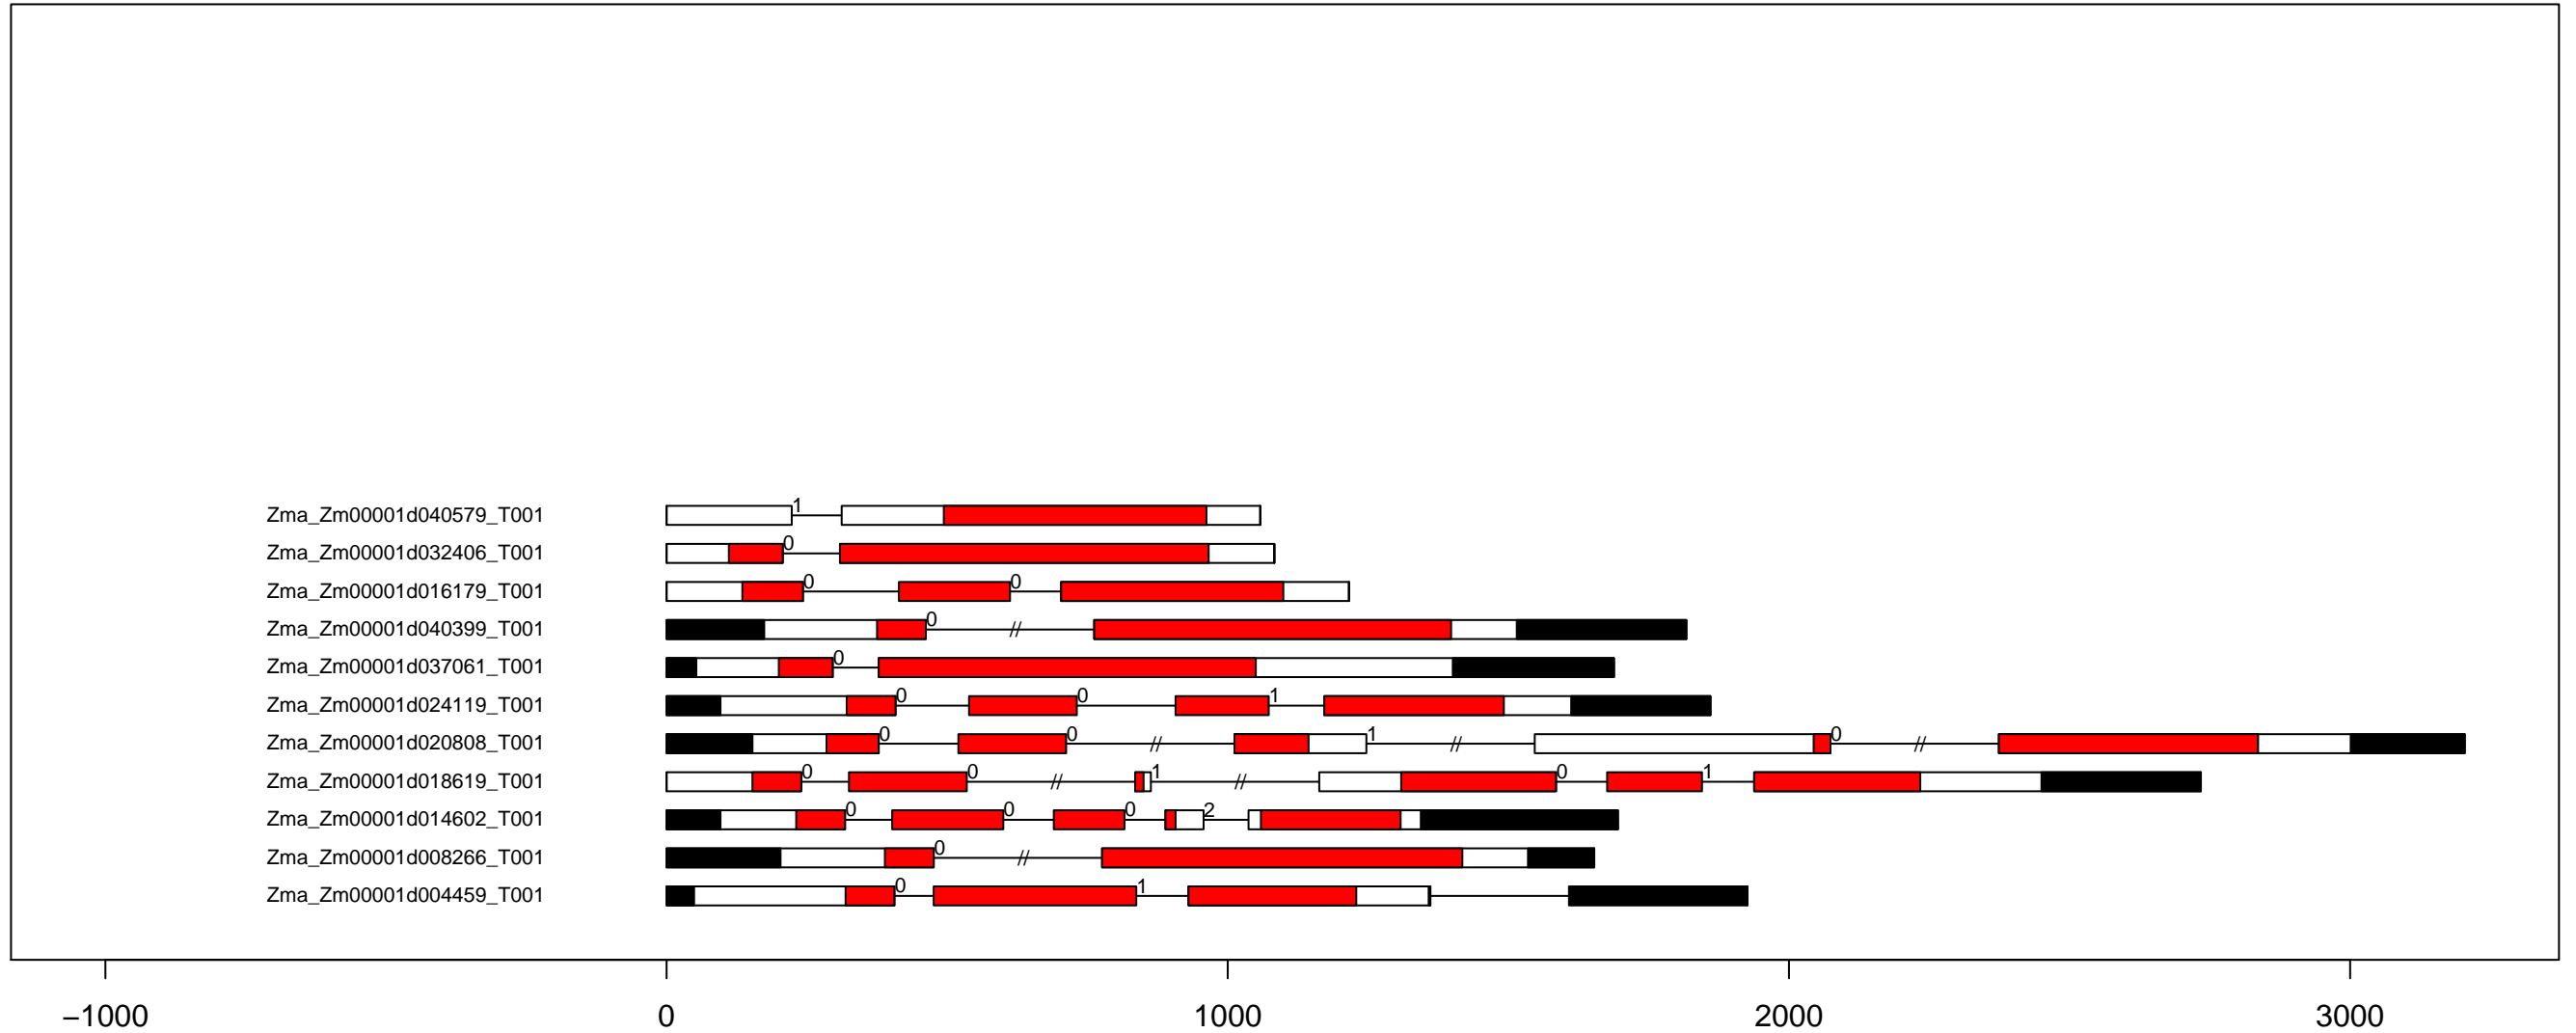

# A.th class III peroxidase I subfamily exon-intron and prx domain diagram (all)

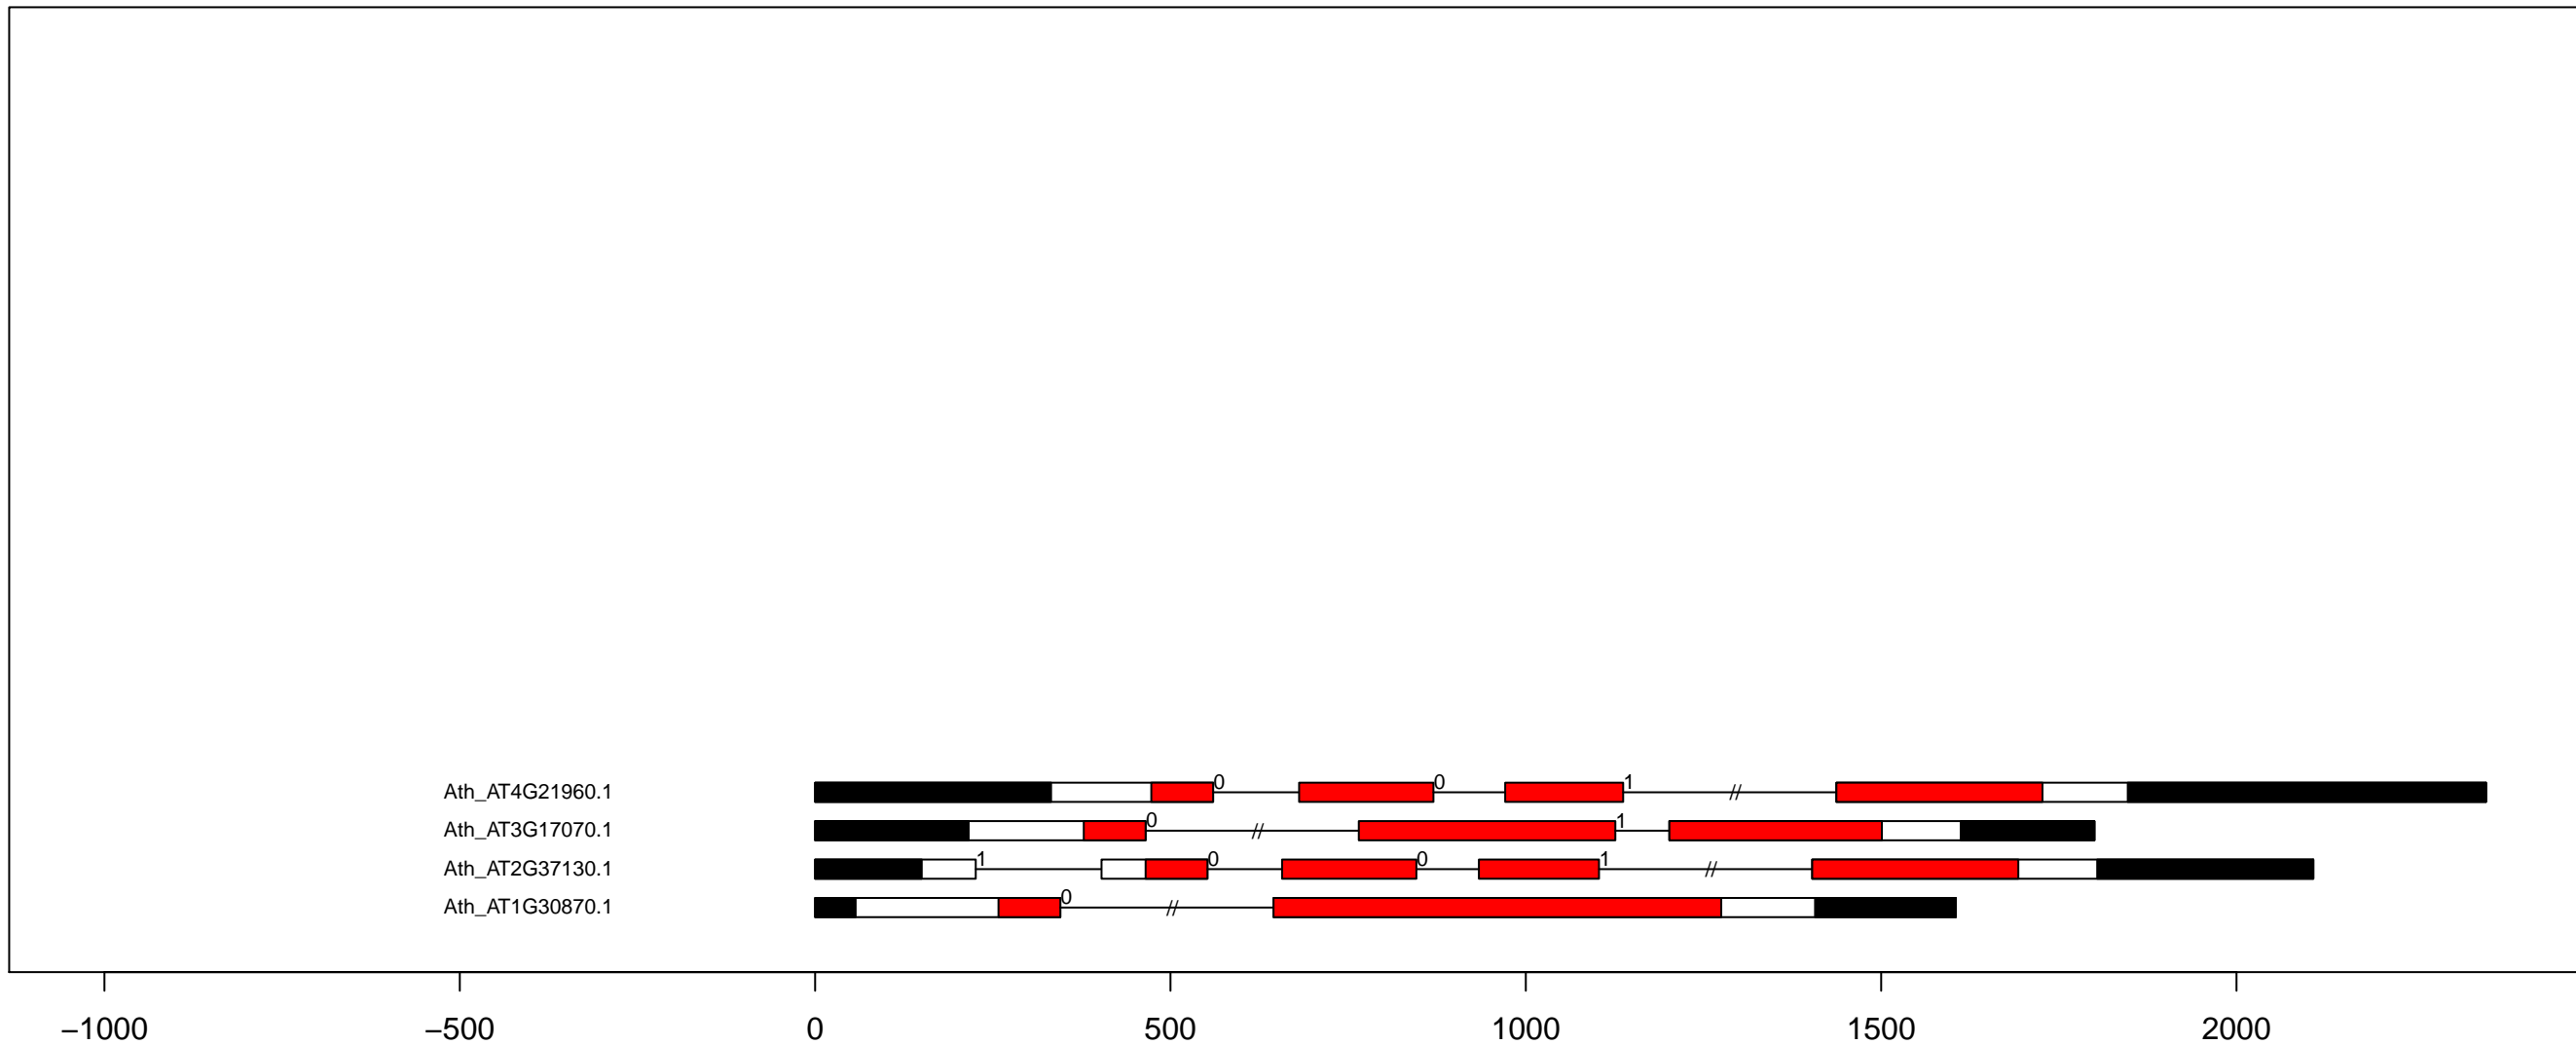

# A.th class III peroxidase V subfamily exon-intron and prx domain diagram (all)

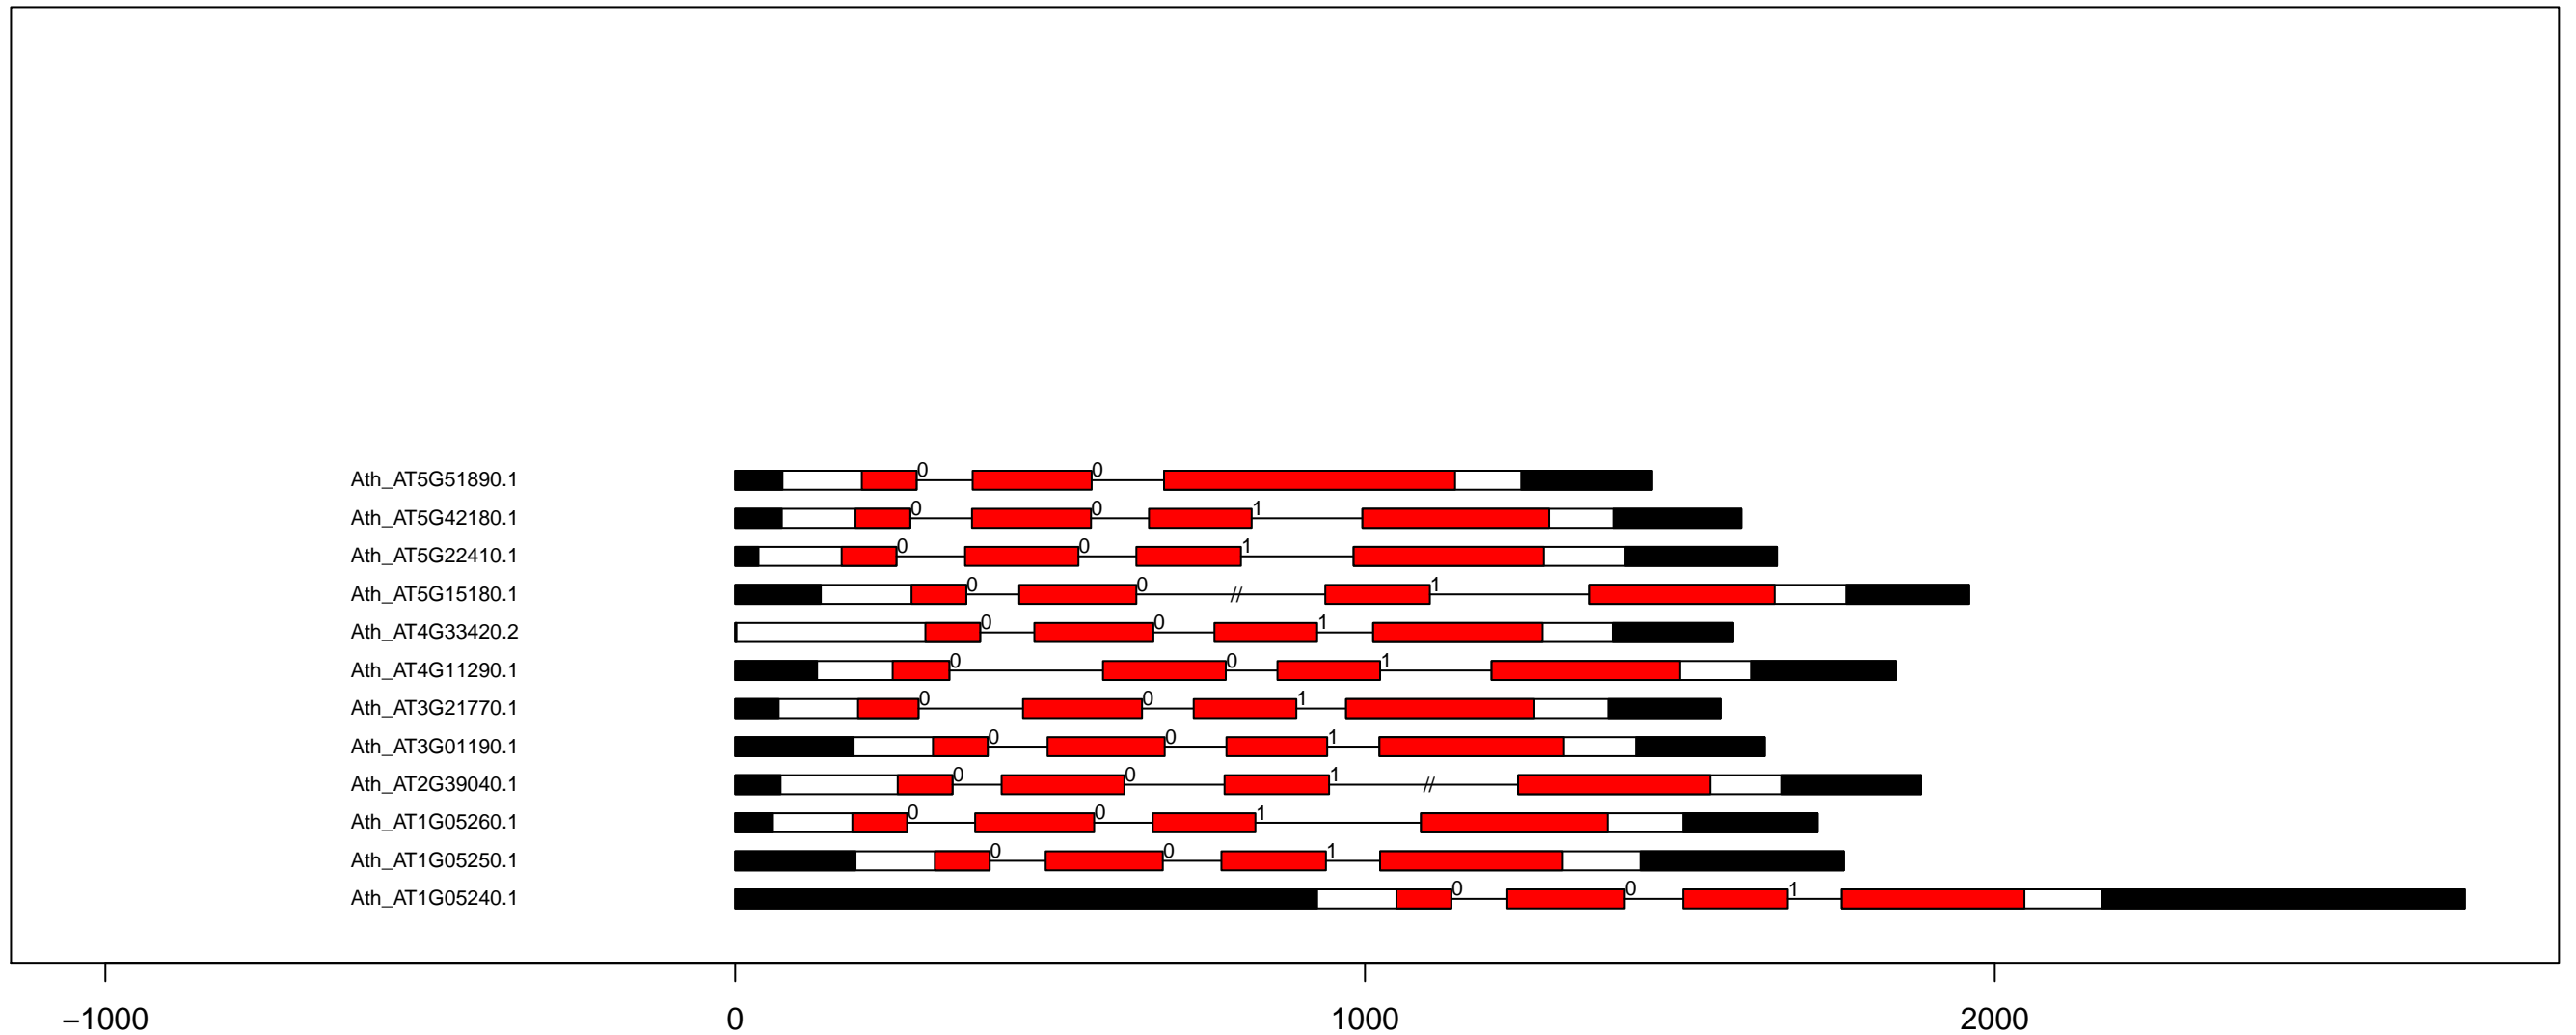

# A.th class III peroxidase VI subfamily exon-intron and prx domain diagram (all)

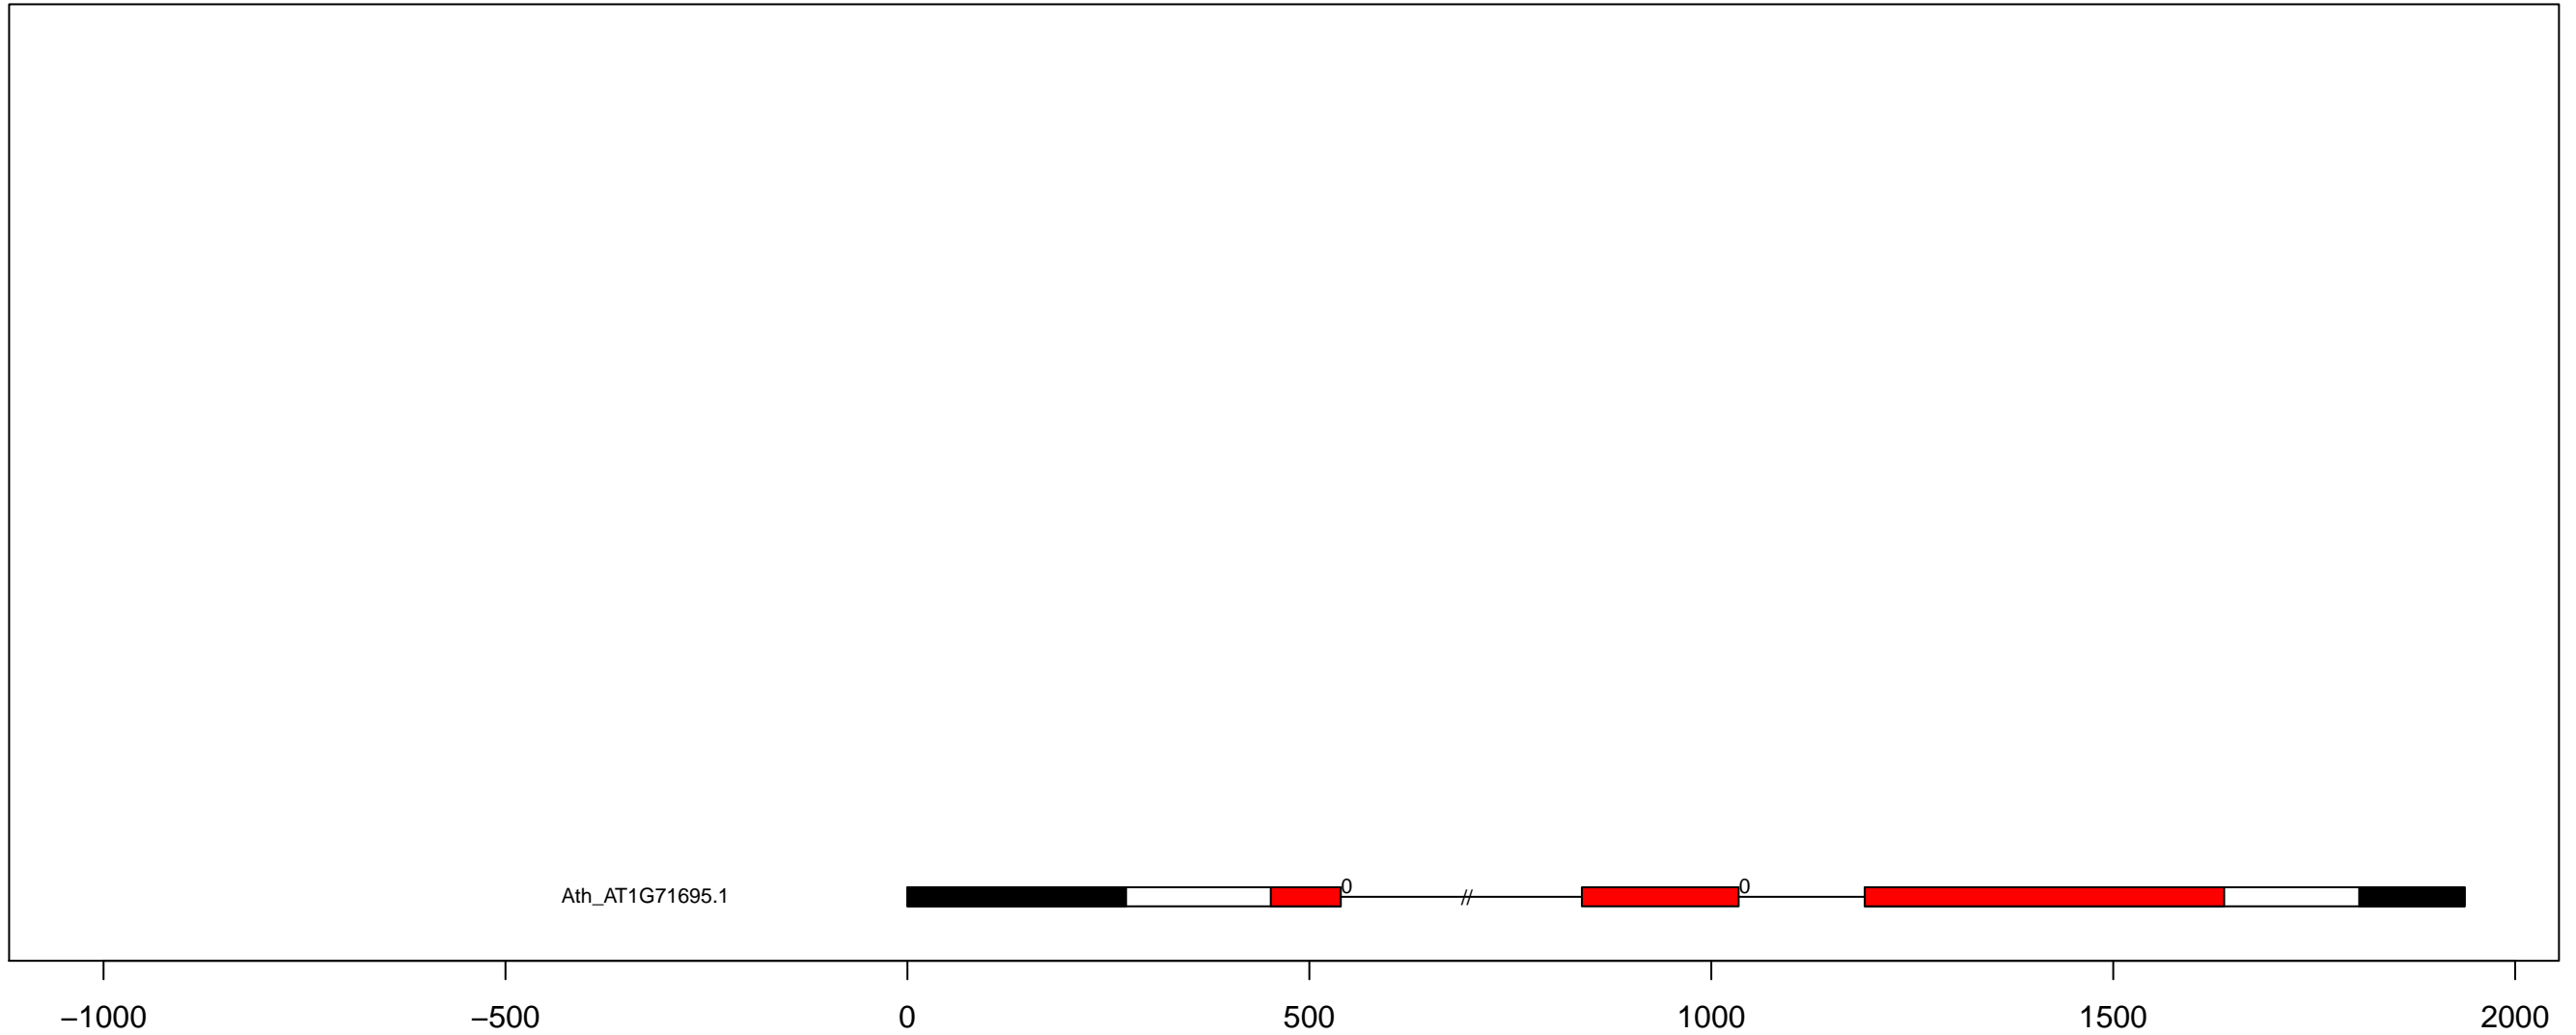

### A.th class III peroxidase VII subfamily exon-intron and prx domain diagram (all)

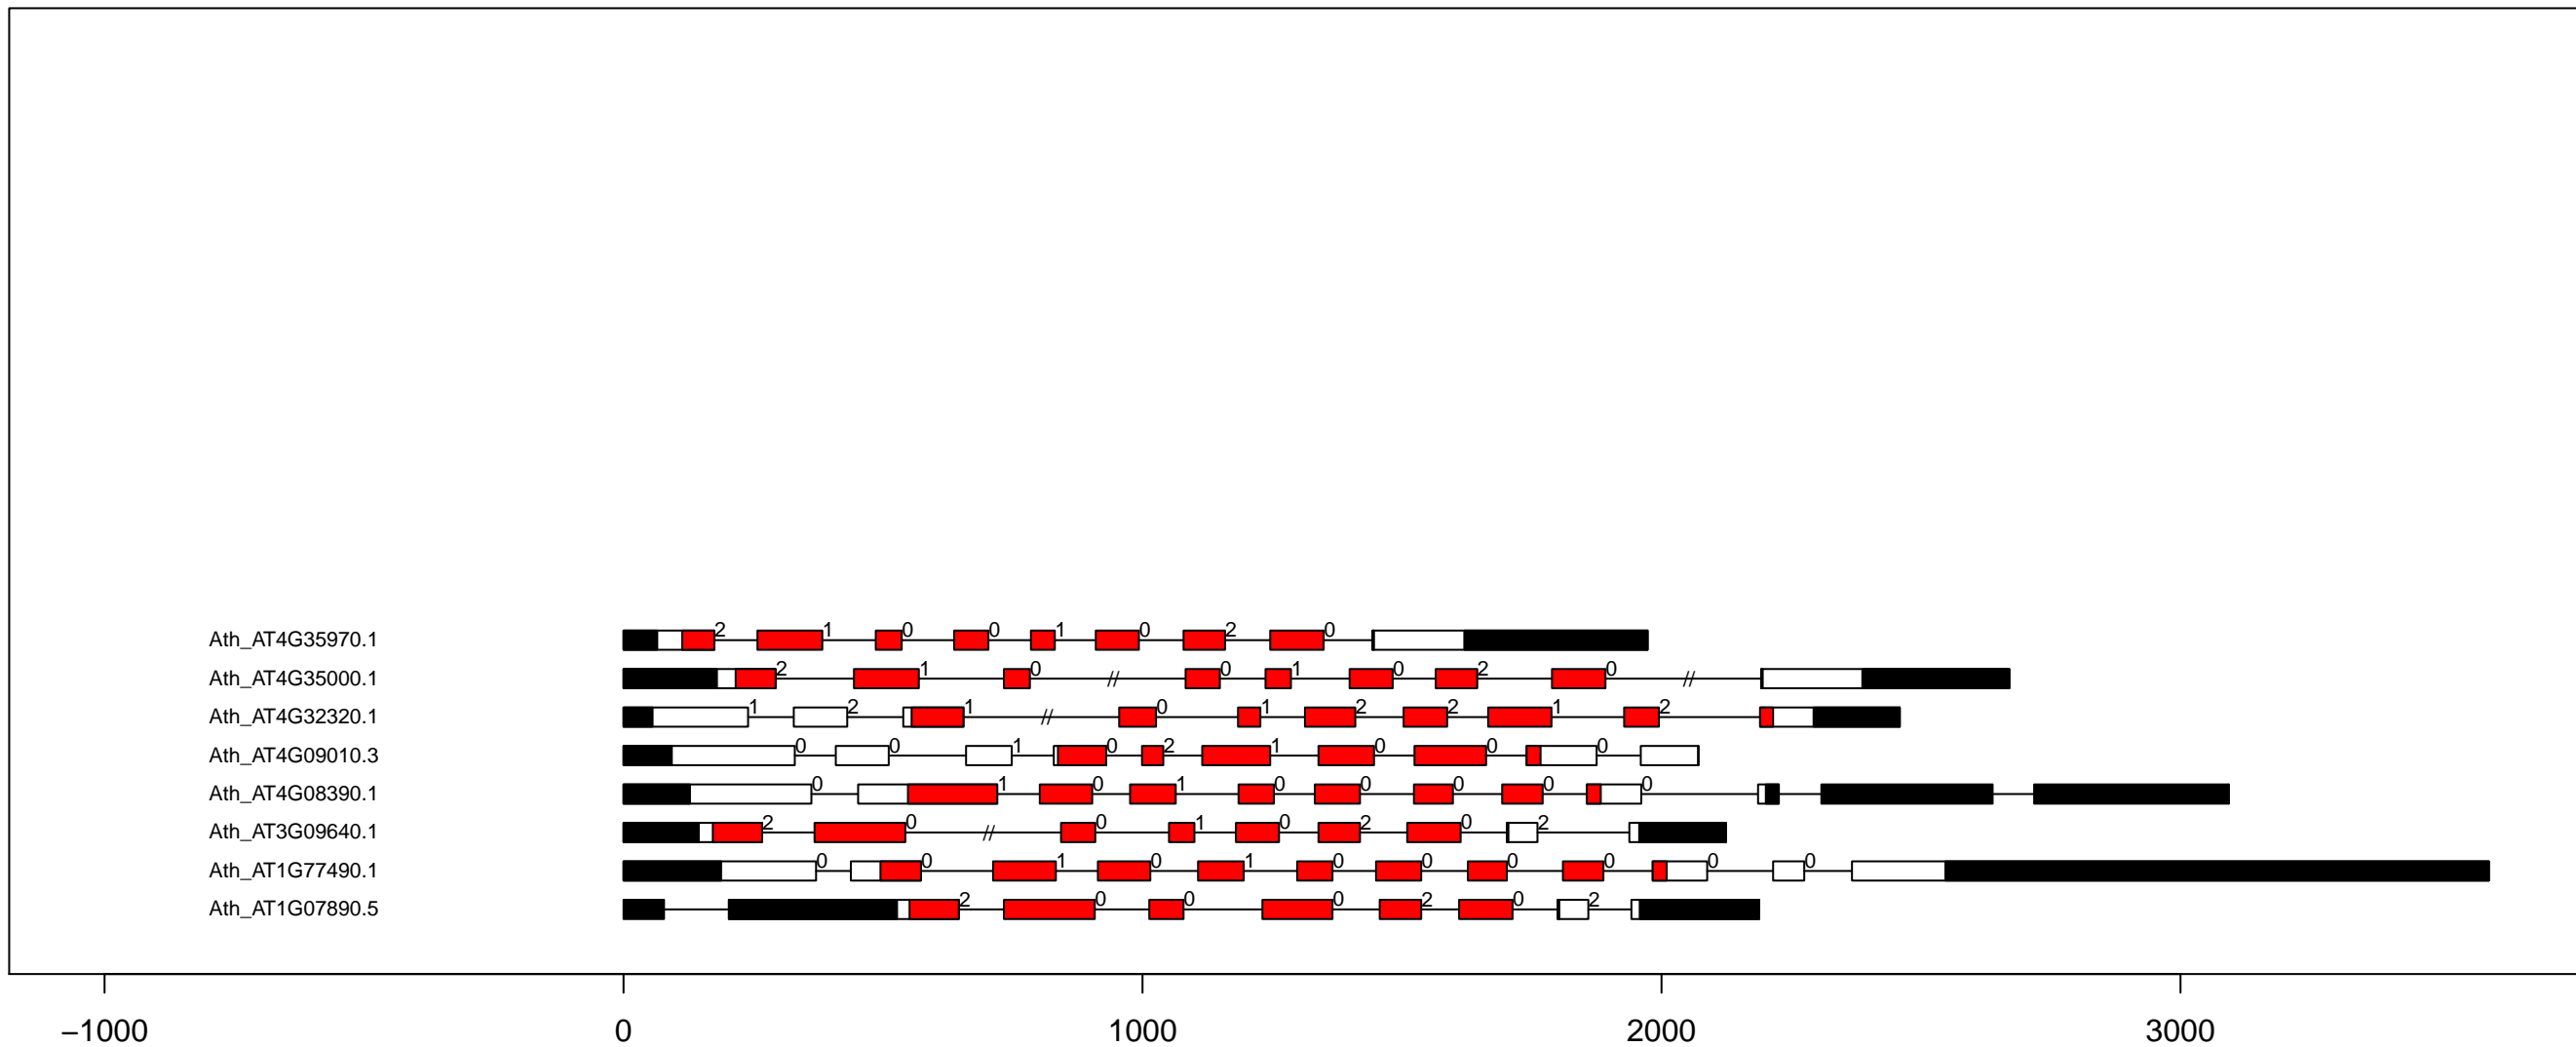

### A.th class III peroxidase IX subfamily exon-intron and prx domain diagram (all)

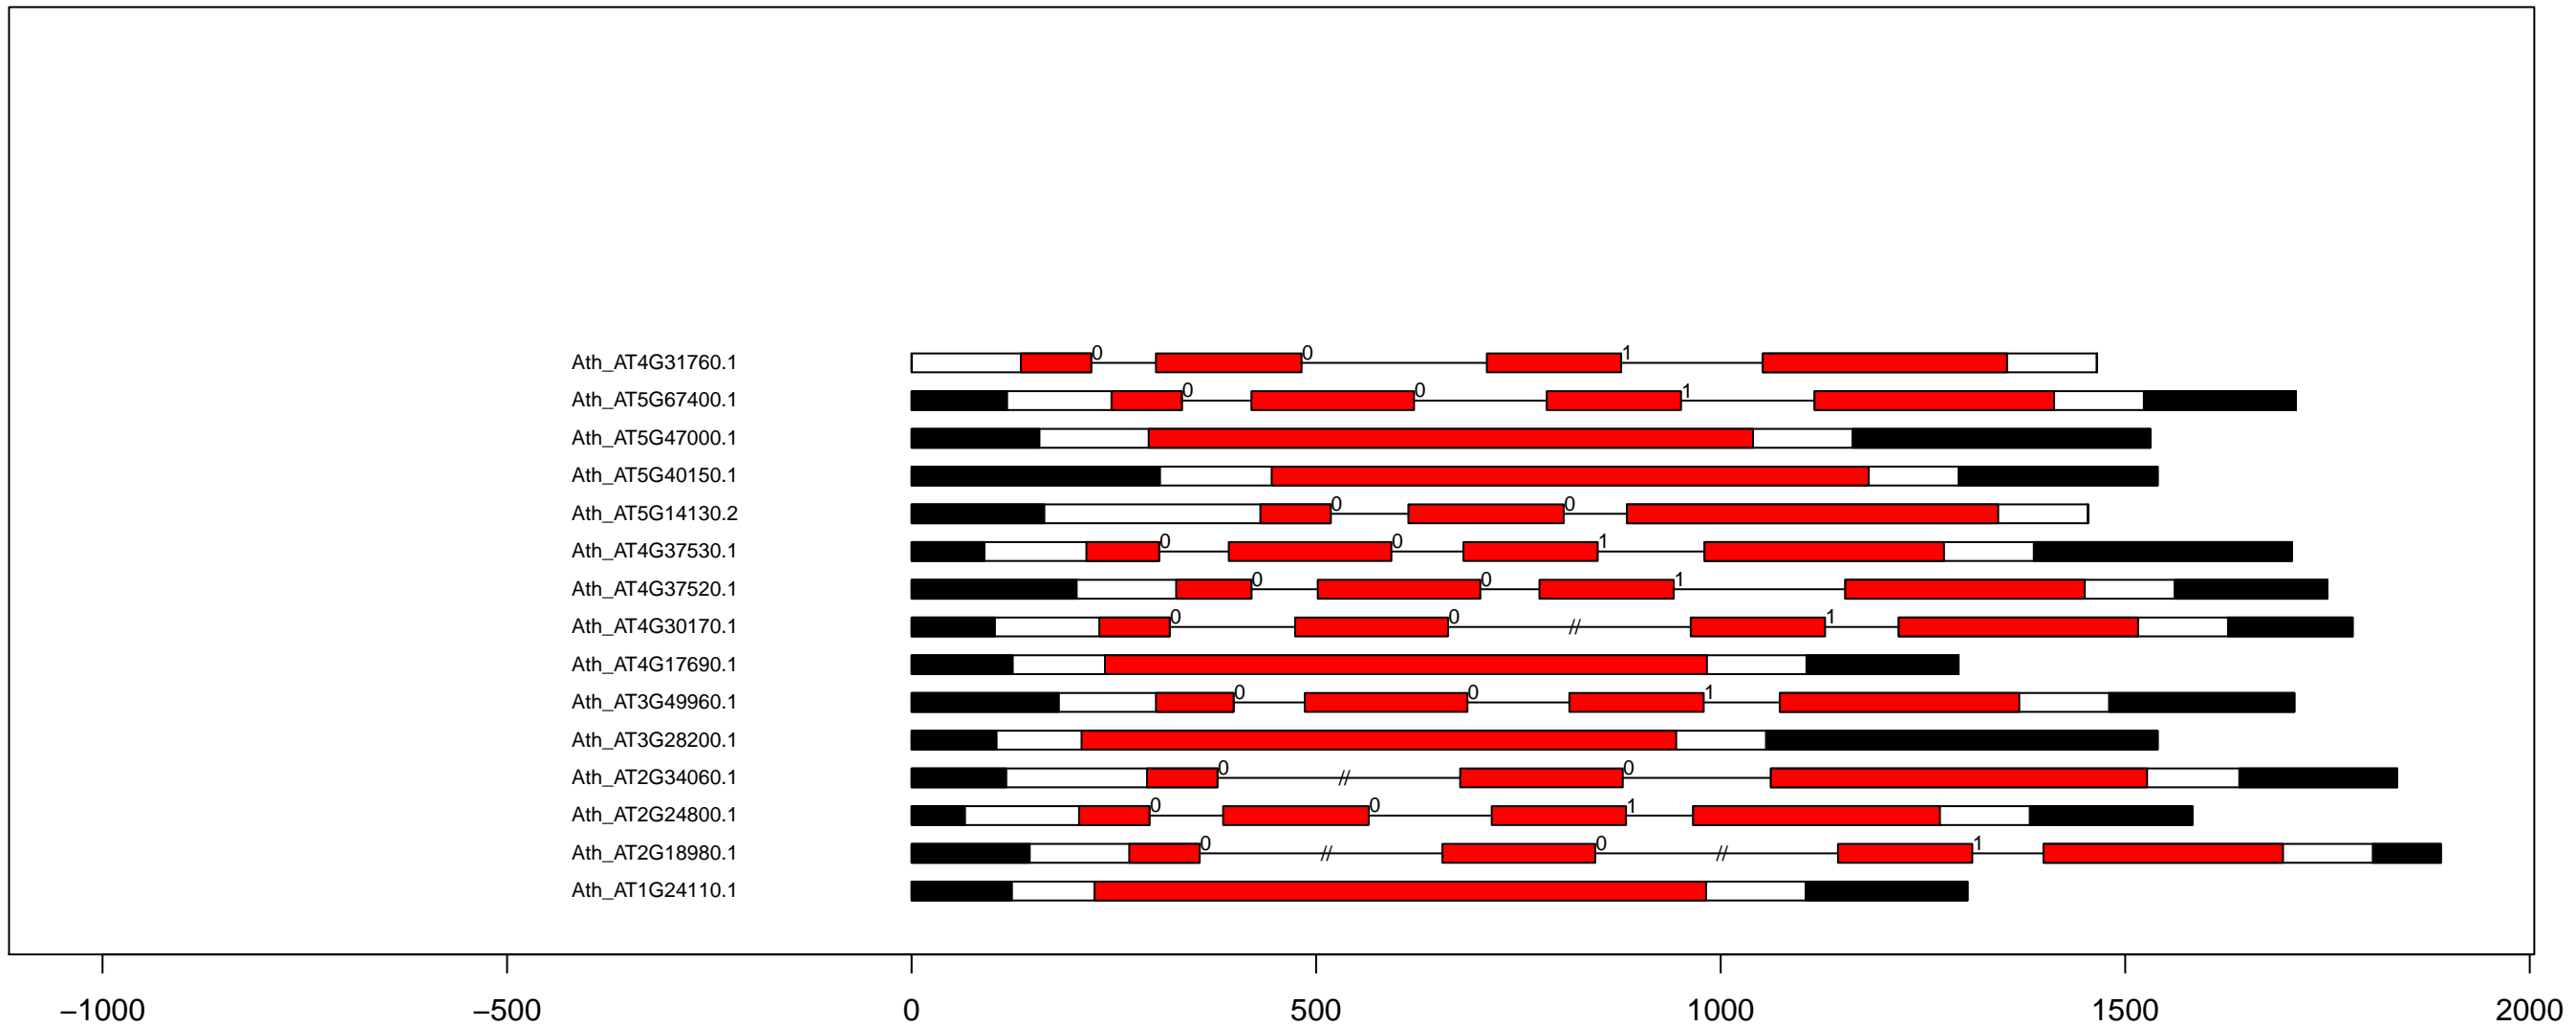



### A.th class III peroxidase X subfamily exon-intron and prx domain diagram (all)

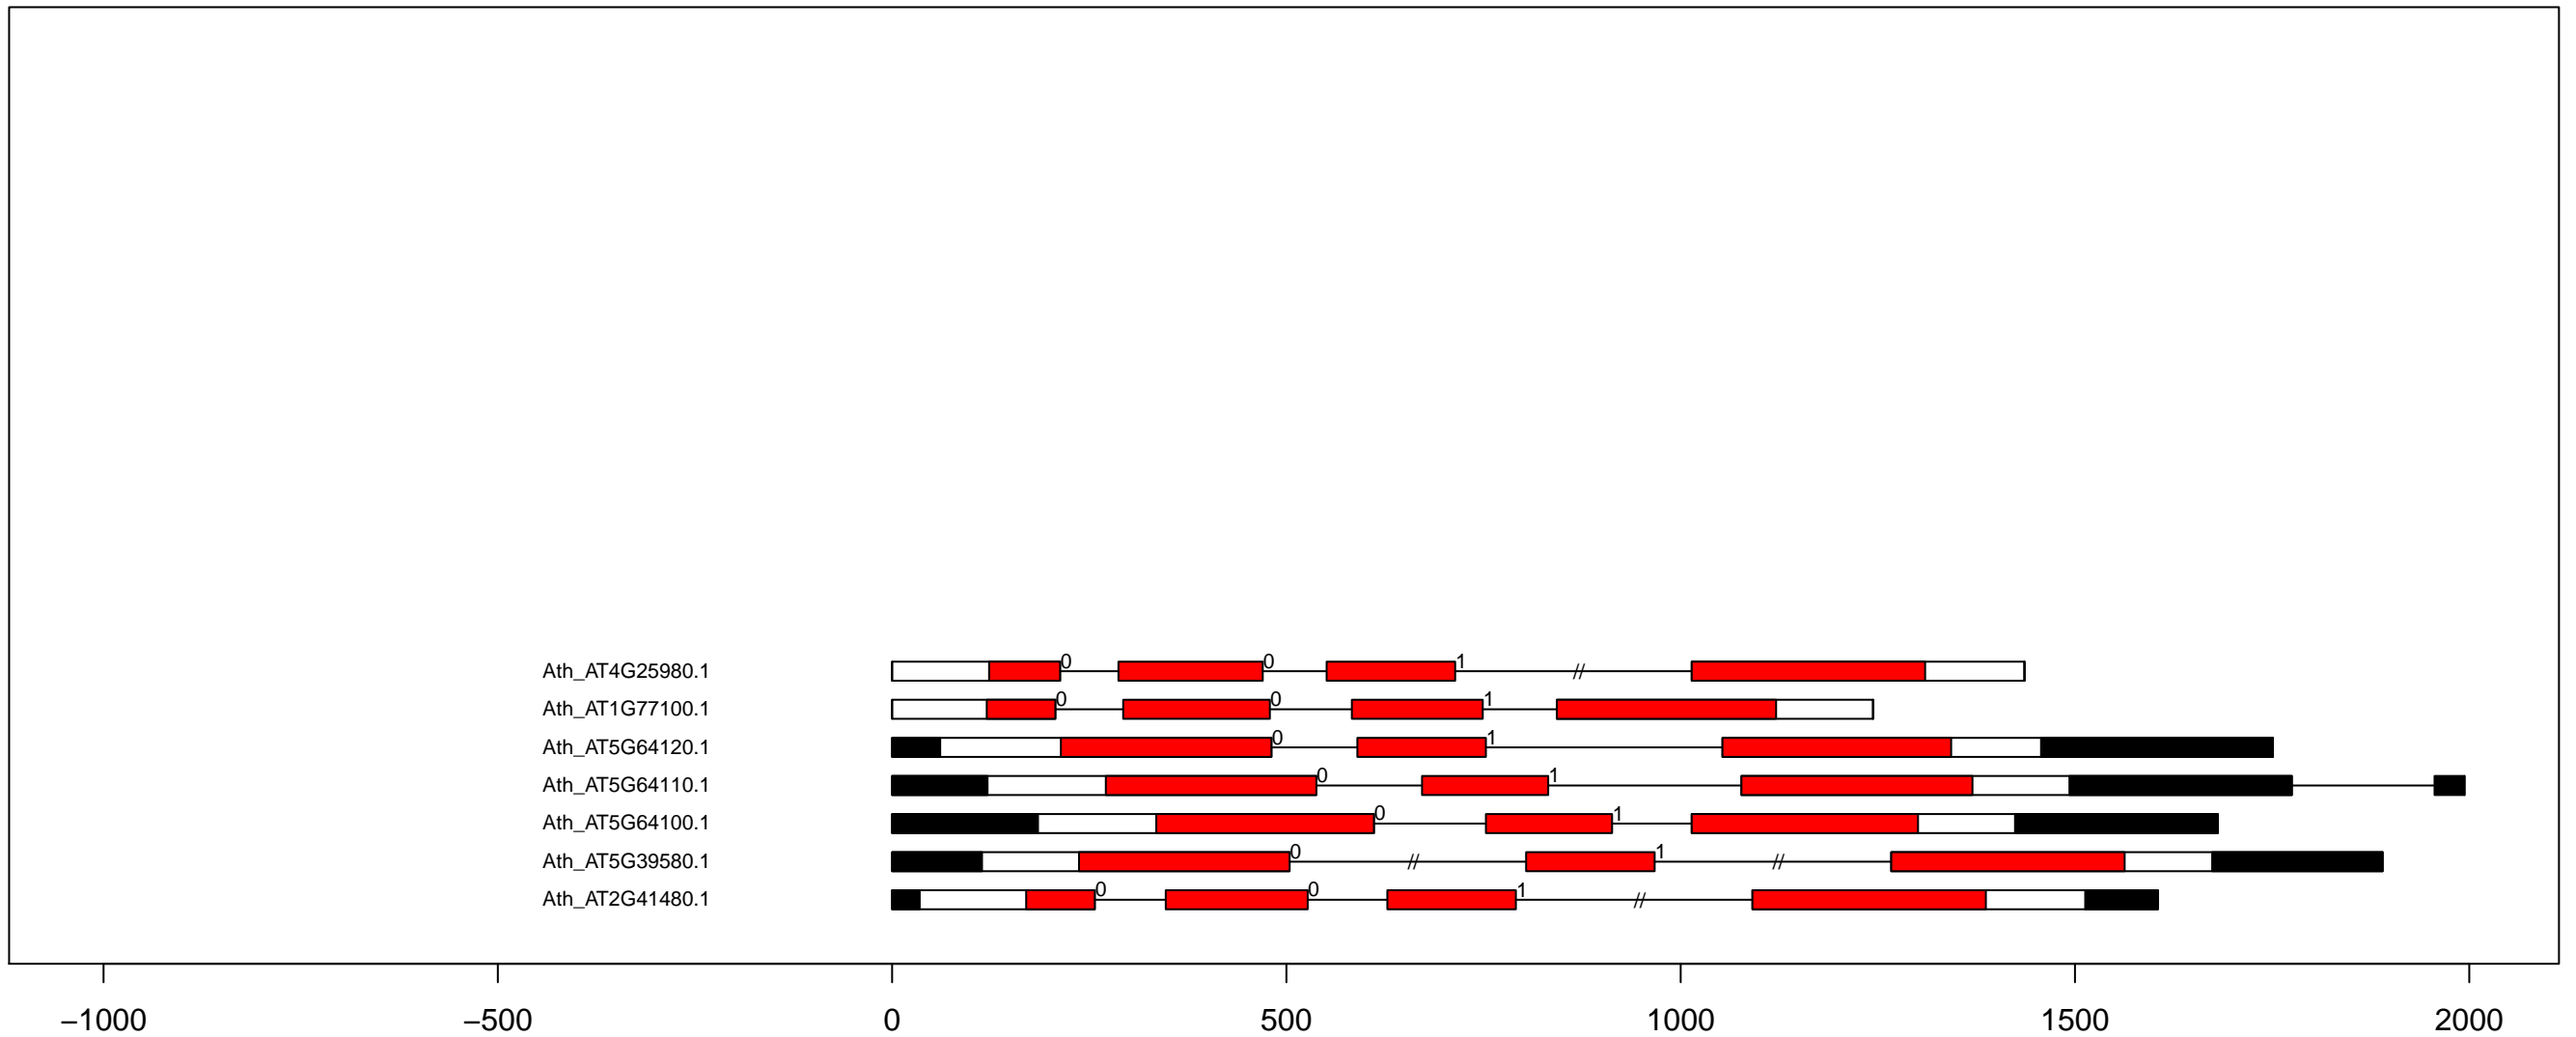

### A.th class III peroxidase XII subfamily exon-intron and prx domain diagram (all)

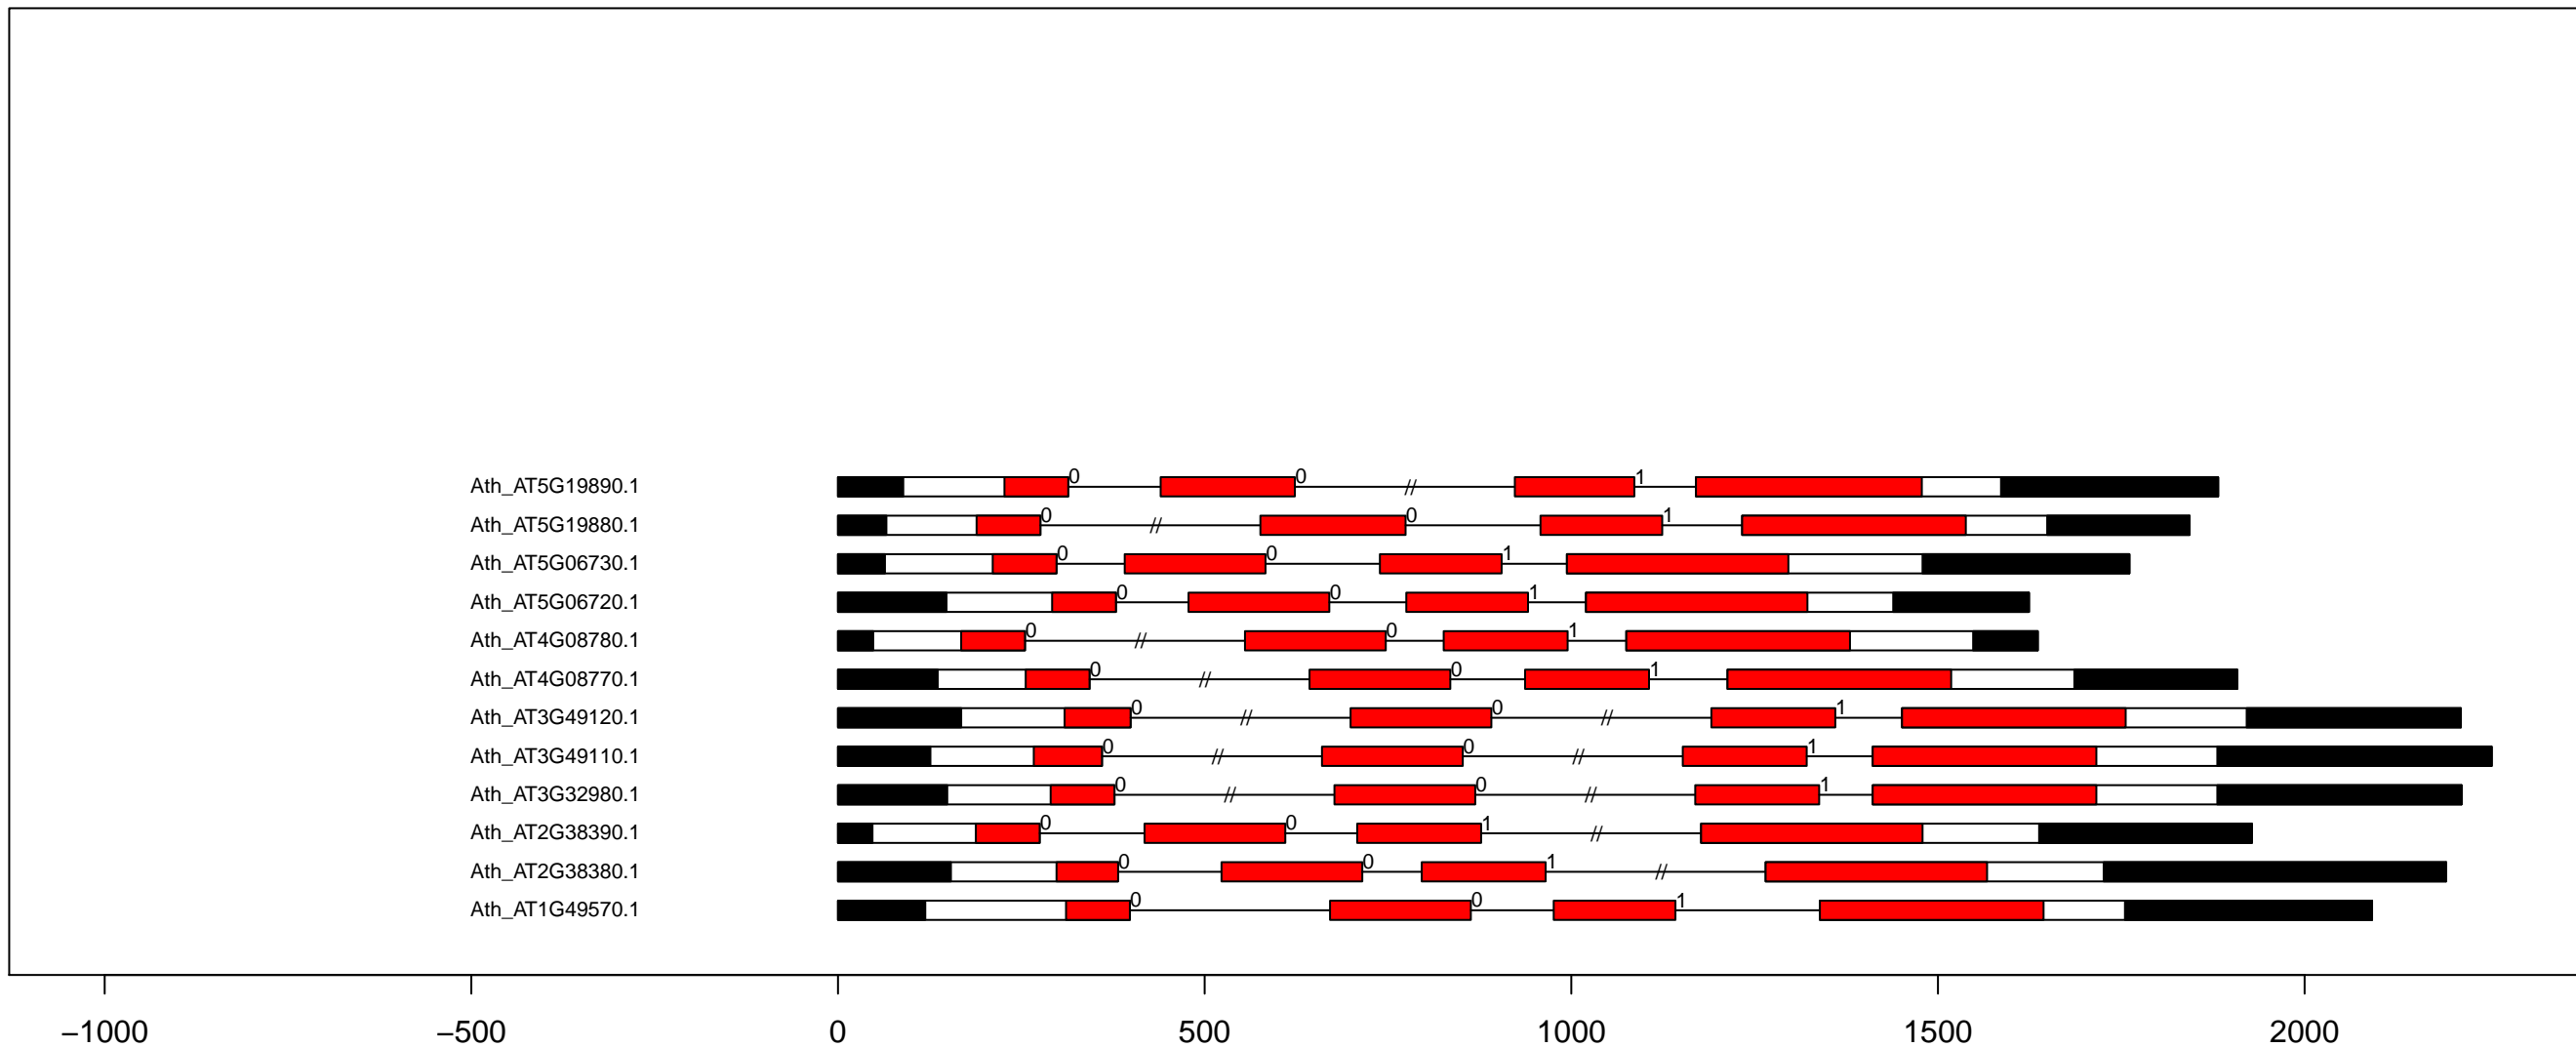

# A.th class III peroxidase XIV subfamily exon-intron and prx domain diagram (all)

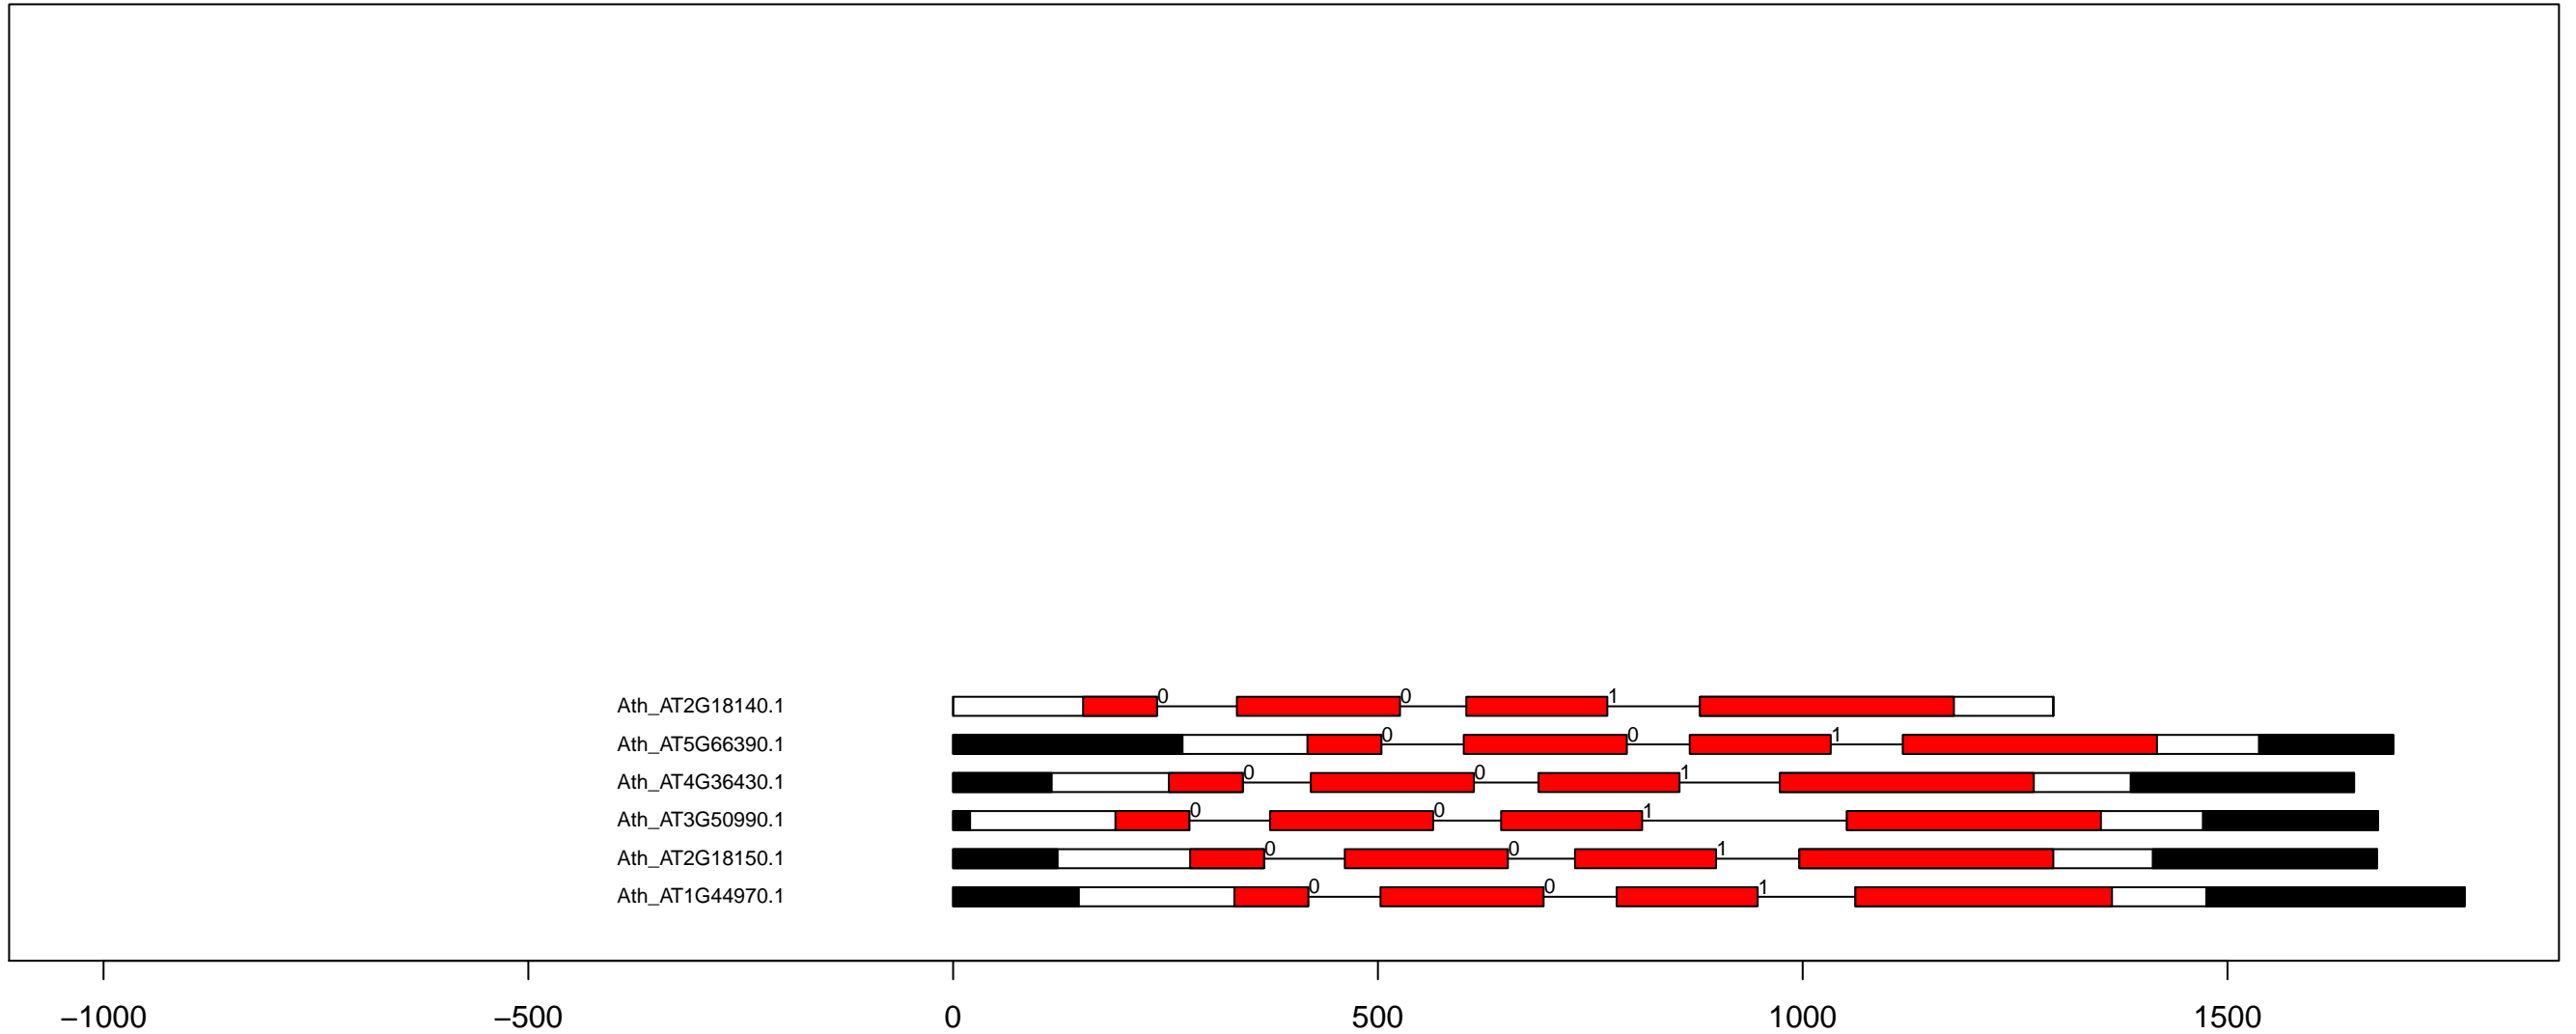

# A.th class III peroxidase XVII subfamily exon-intron and prx domain diagram (all)

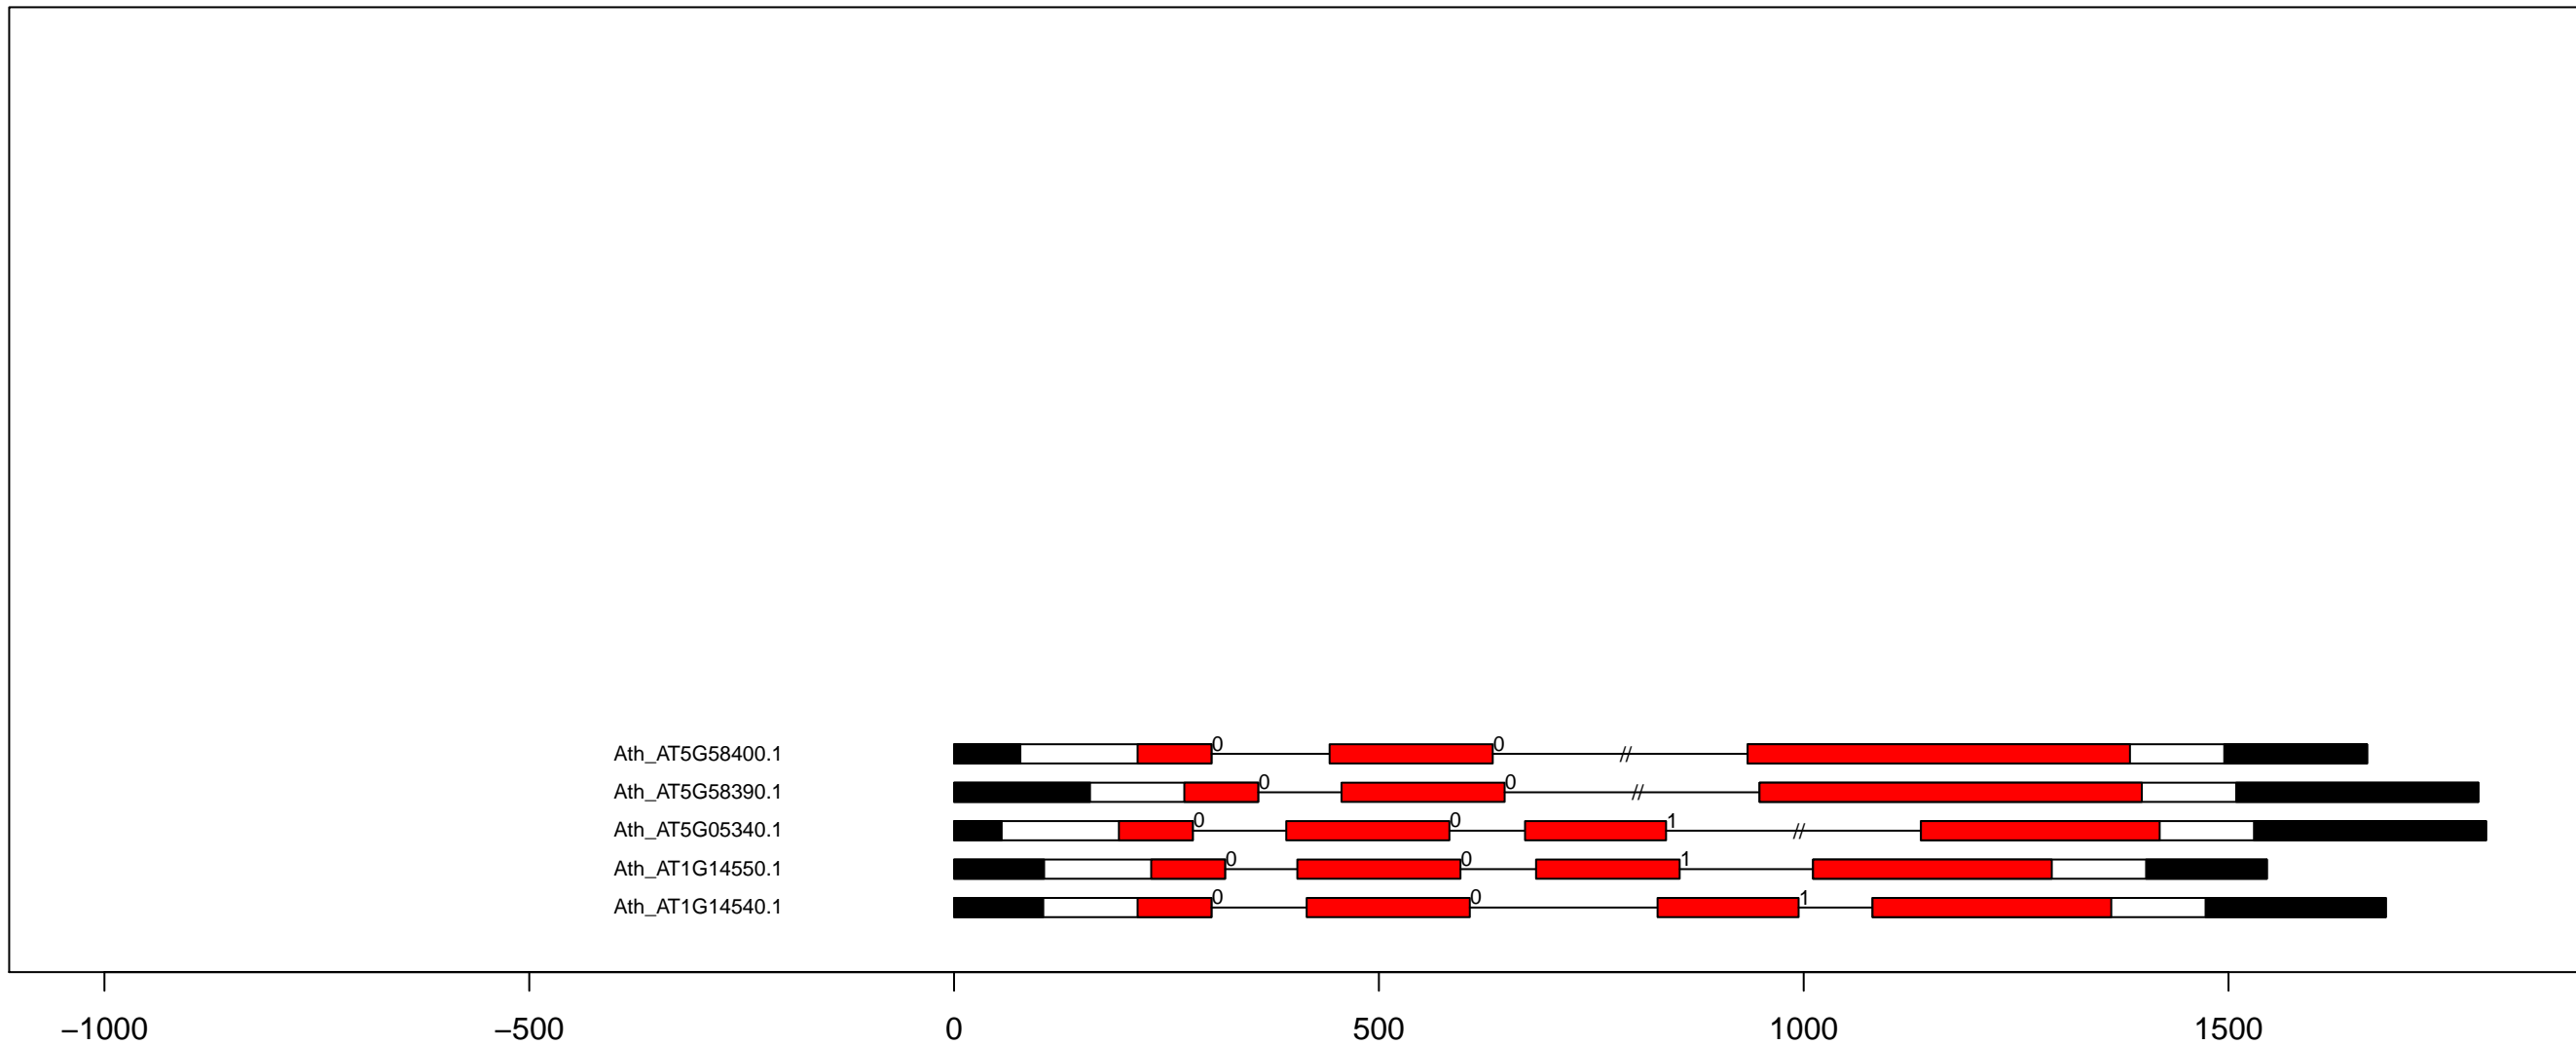

**A.th class III peroxidase XVIII subfamily exon-intron and prx domain diagram (all)**

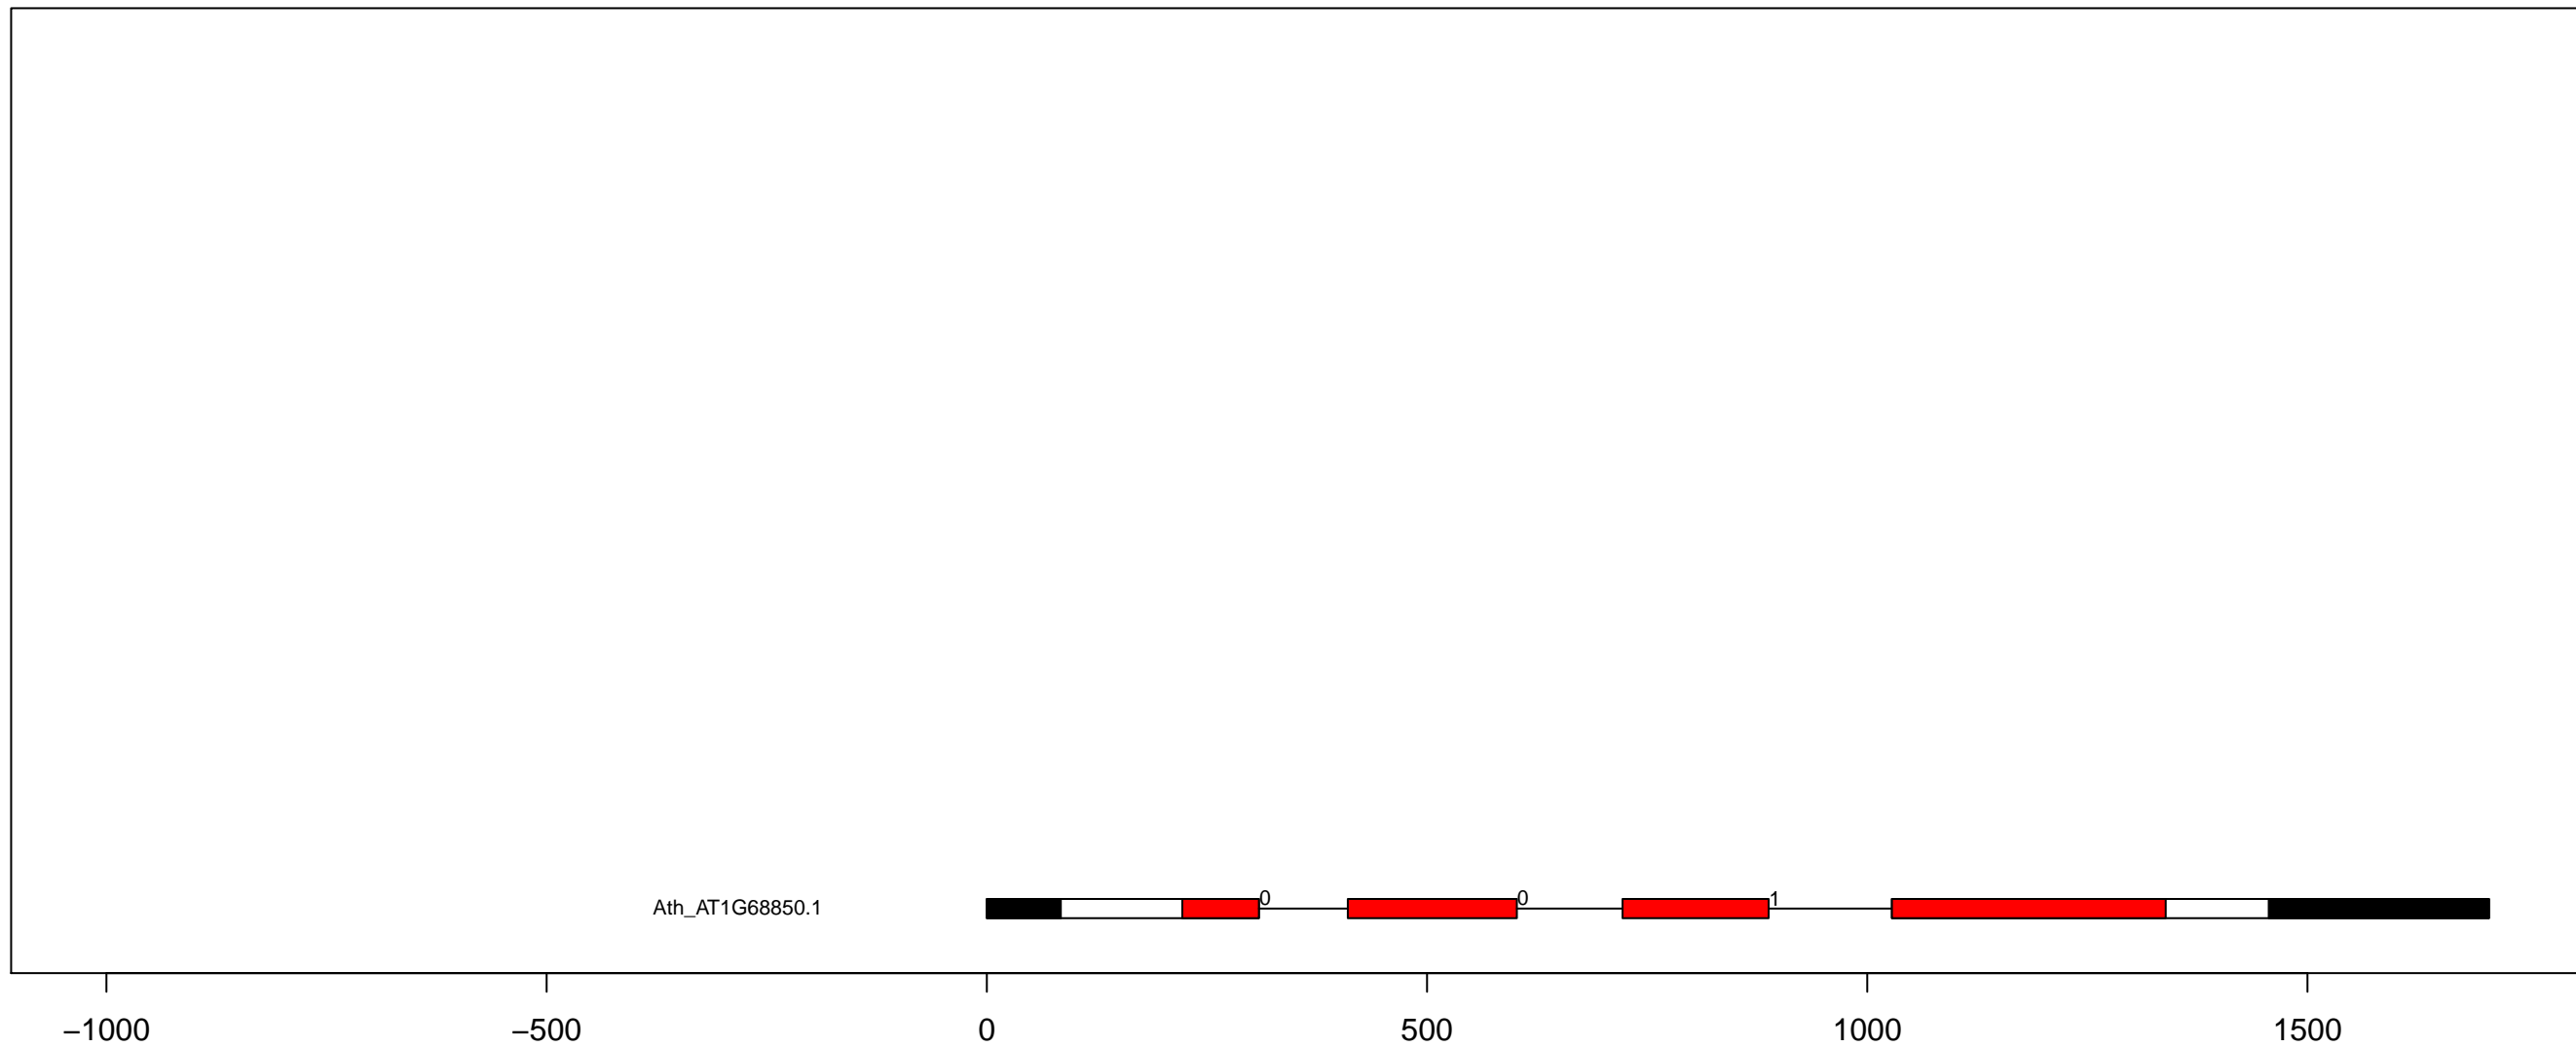

# A.th class III peroxidase unclar\_classification subfamily exon-intron and prx domain diagram (all)

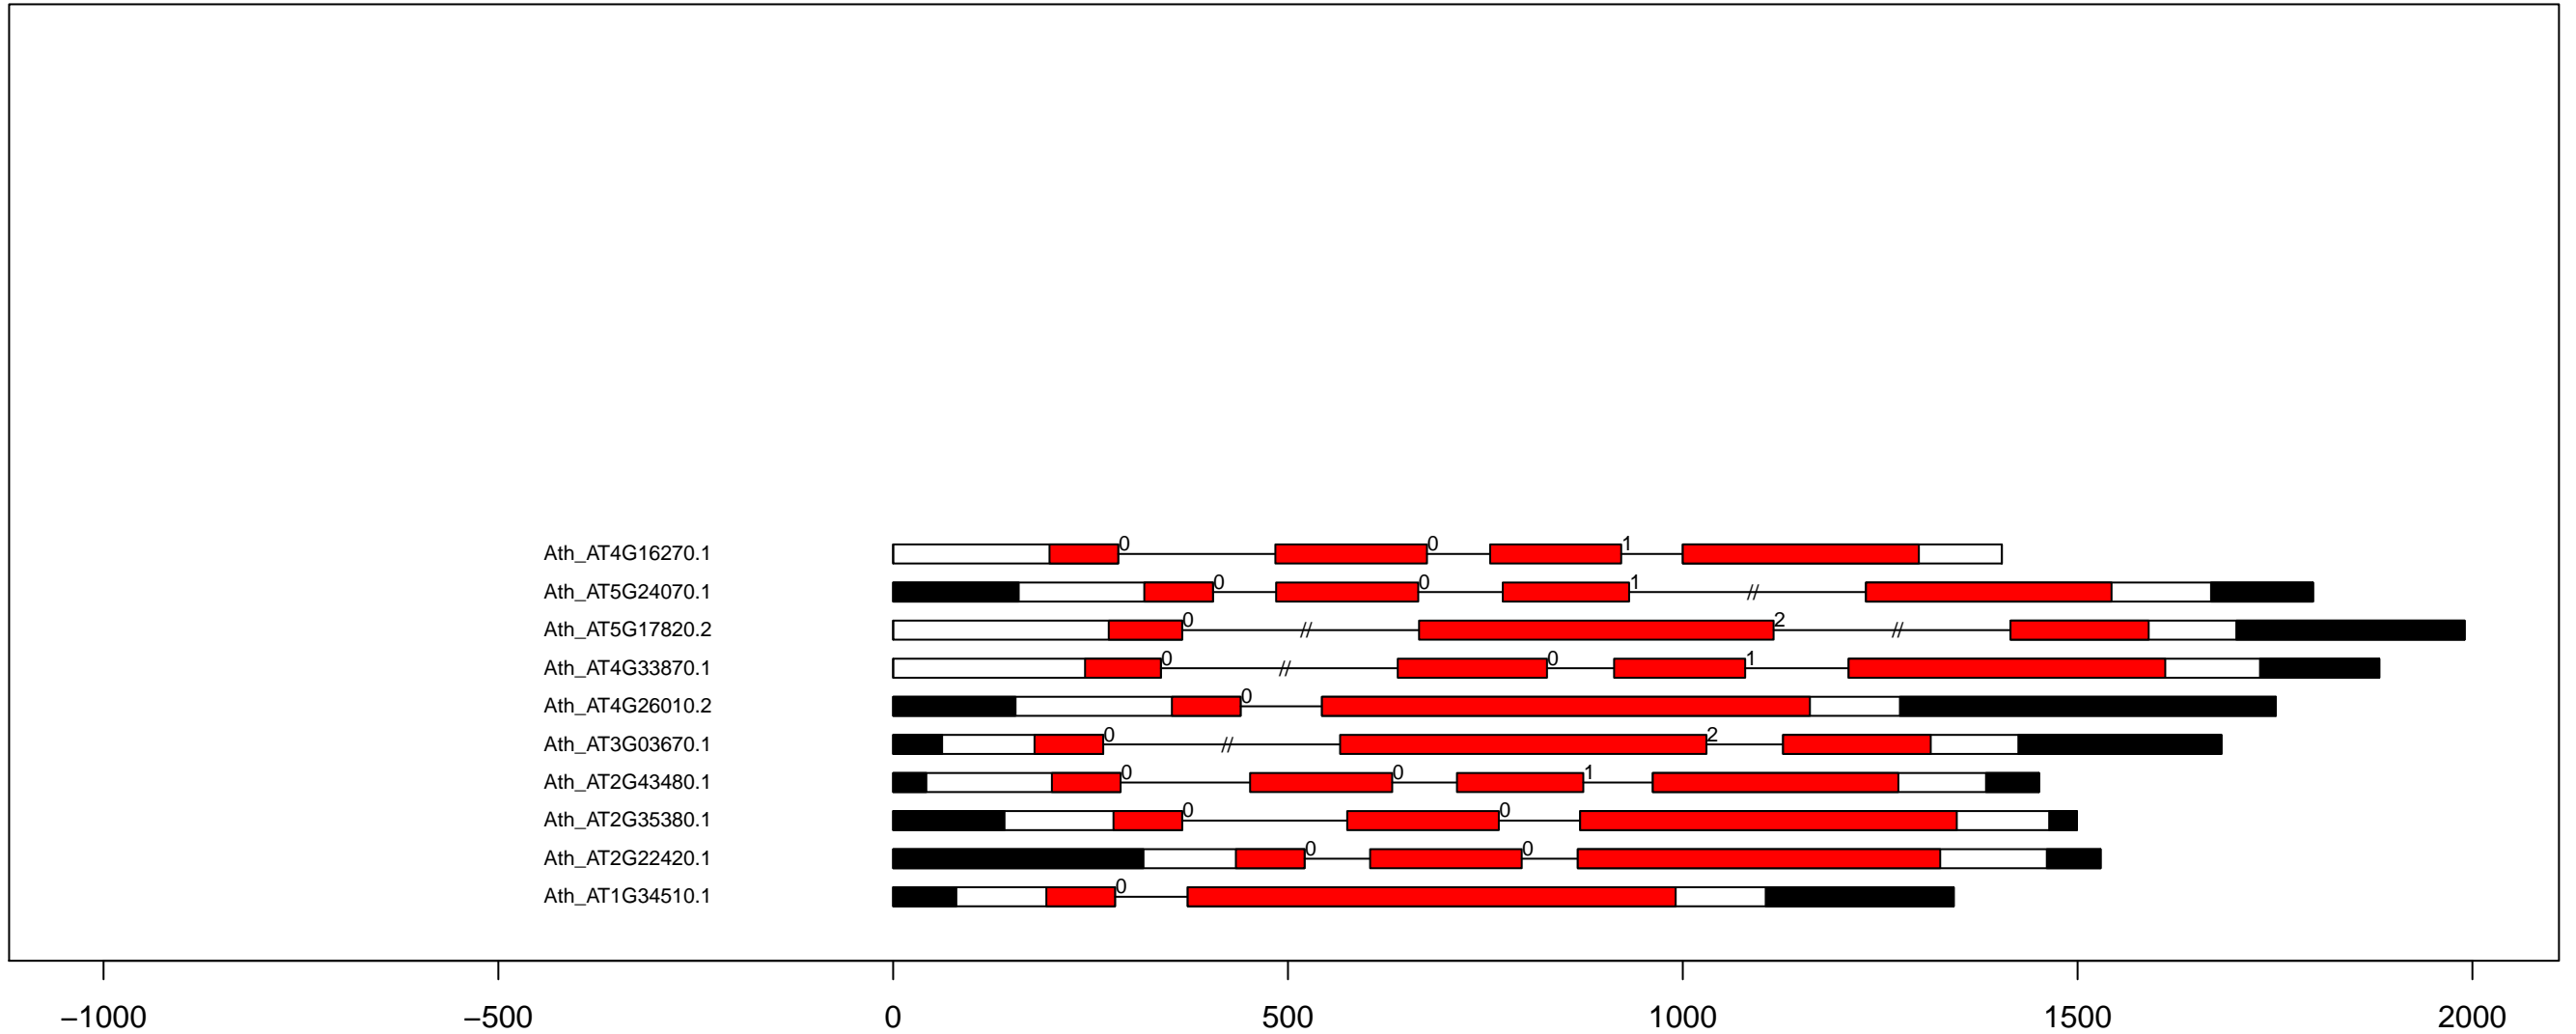



### V.vi class III peroxidase V subfamily exon-intron and prx domain diagram (all)

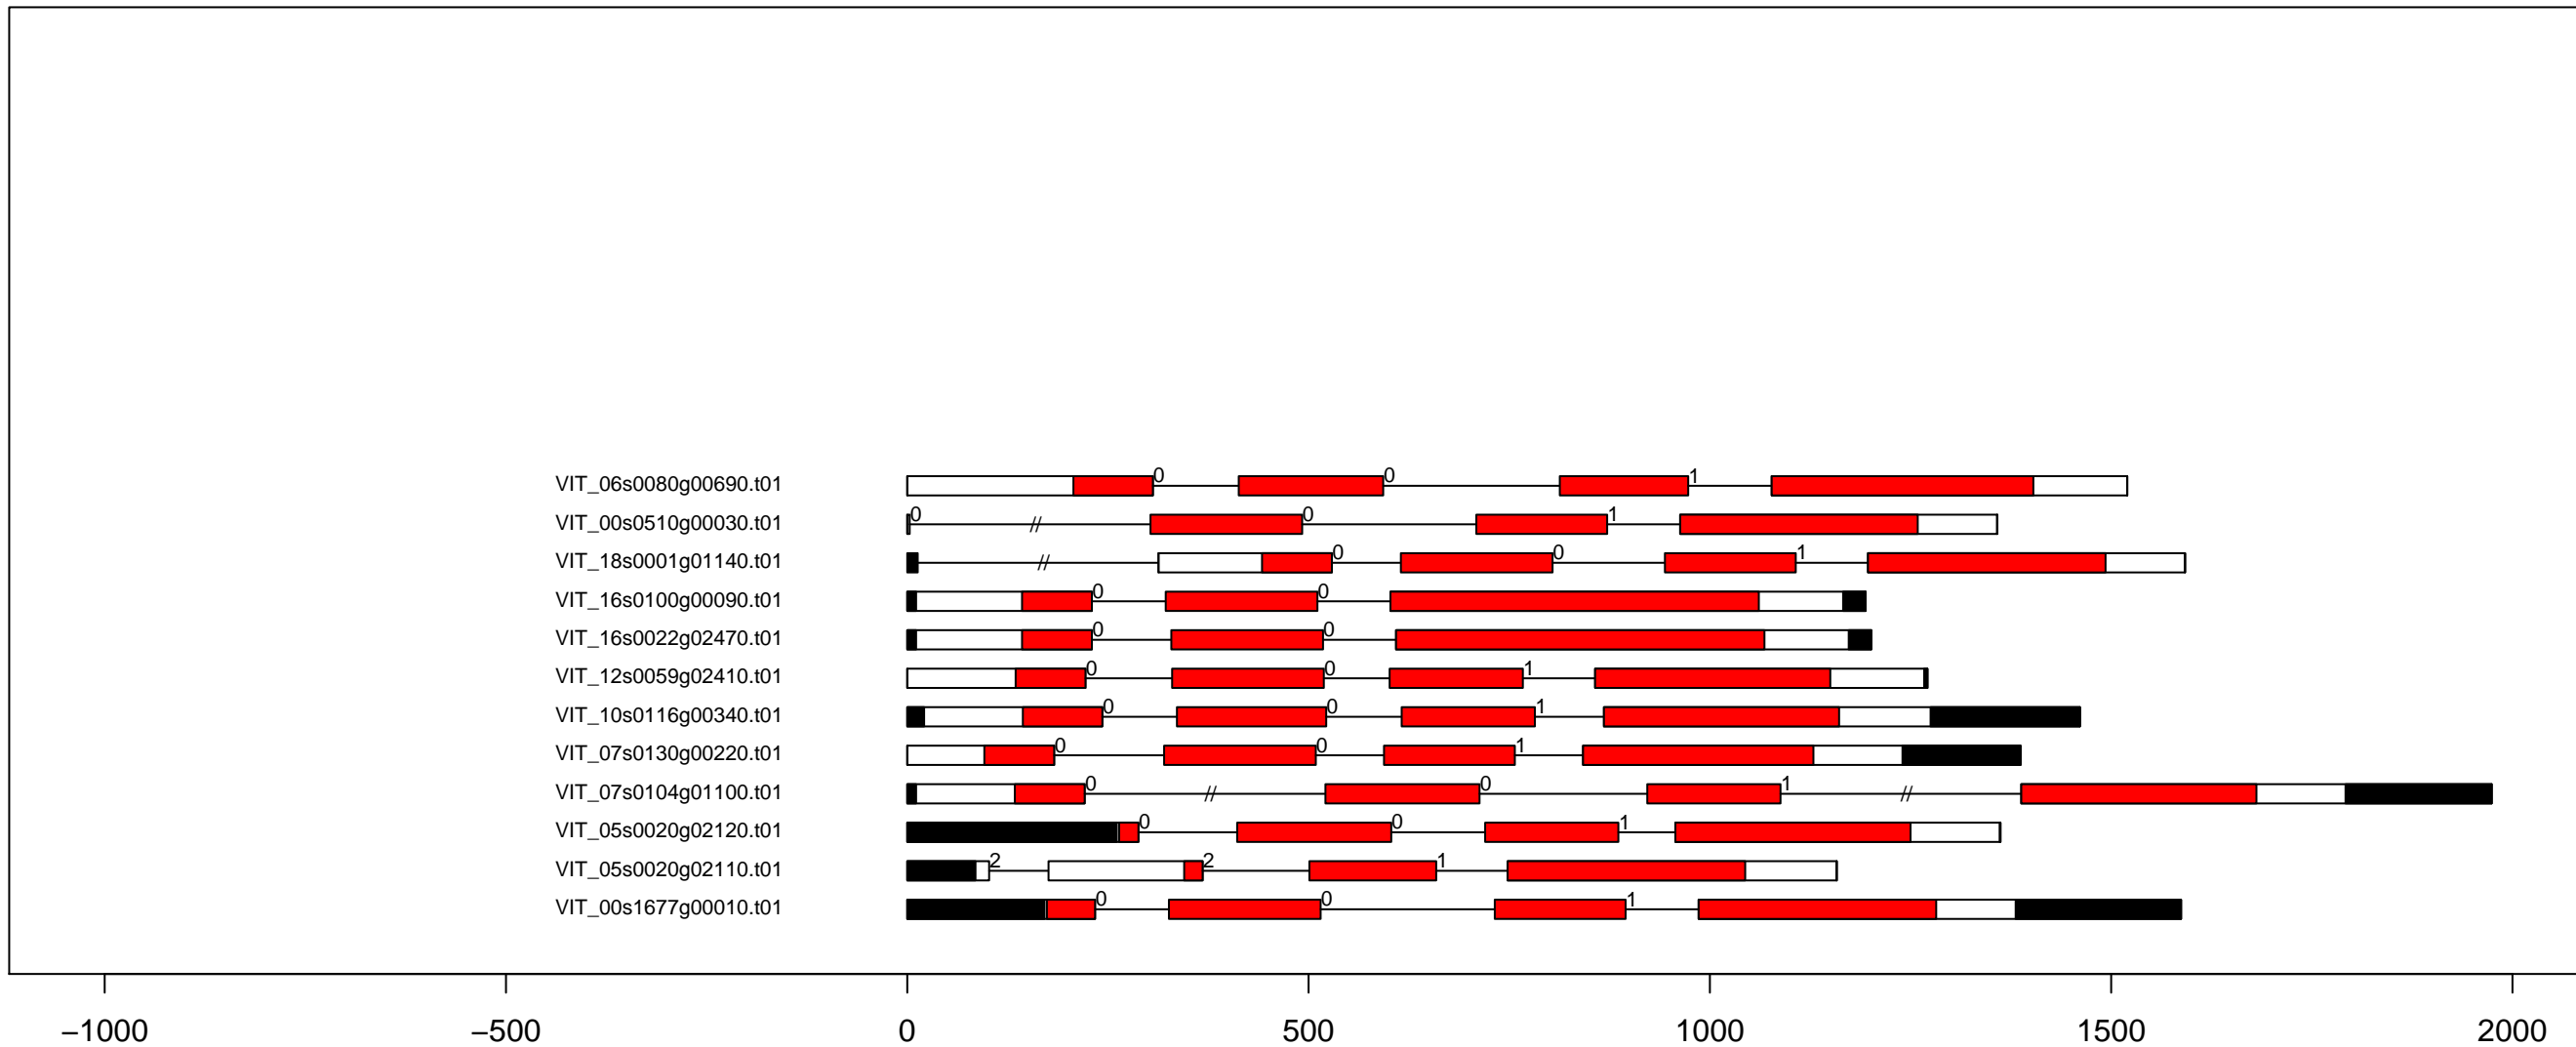



# V.vi class III peroxidase VI subfamily exon-intron and prx domain diagram (all)

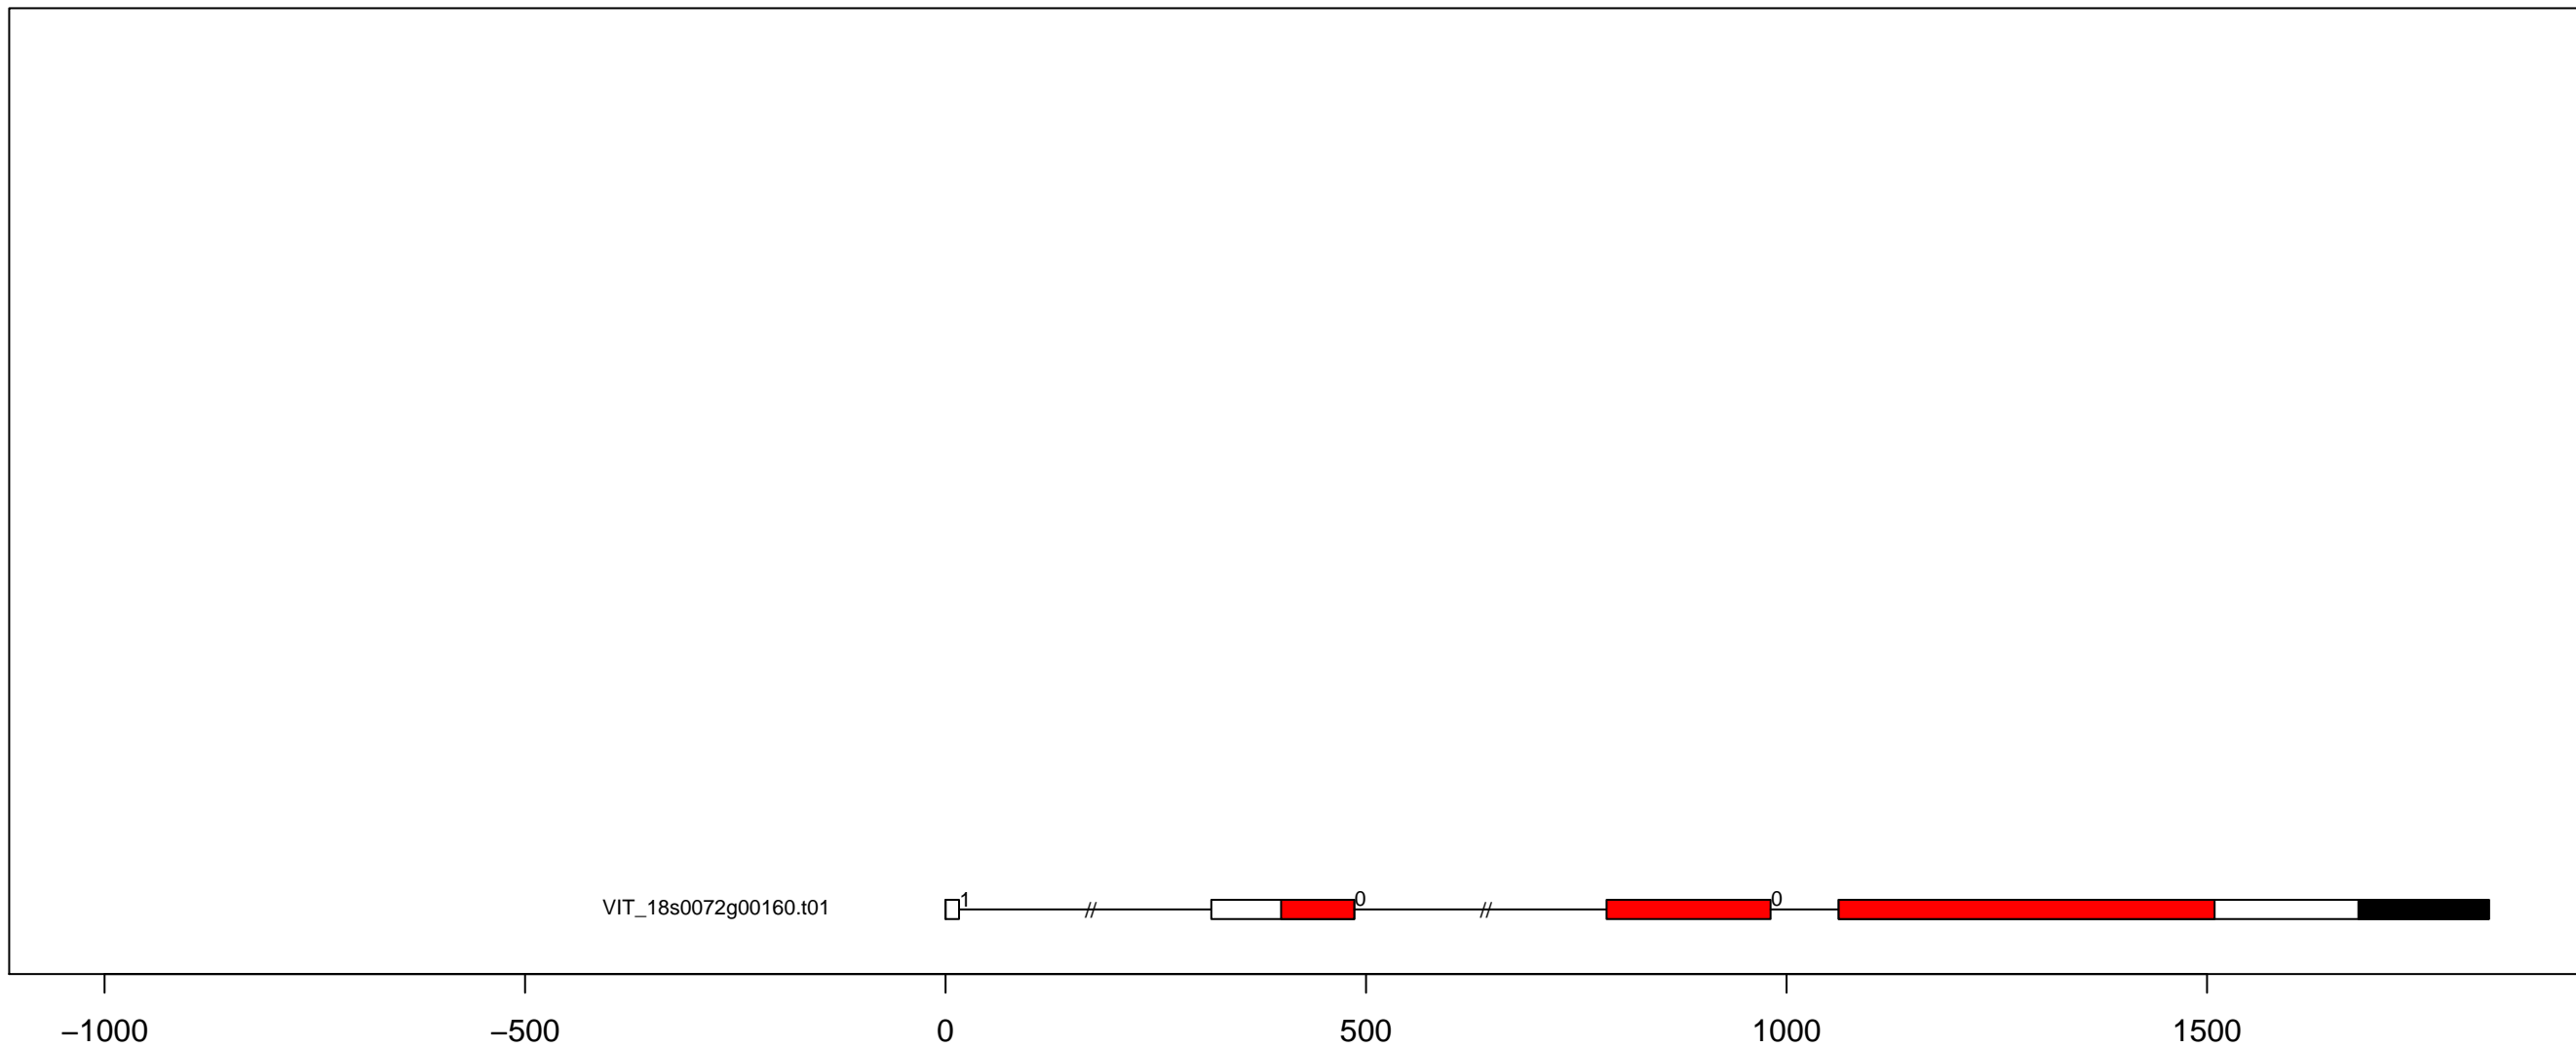

# V.vi class III peroxidase VII subfamily exon-intron and prx domain diagram (all)

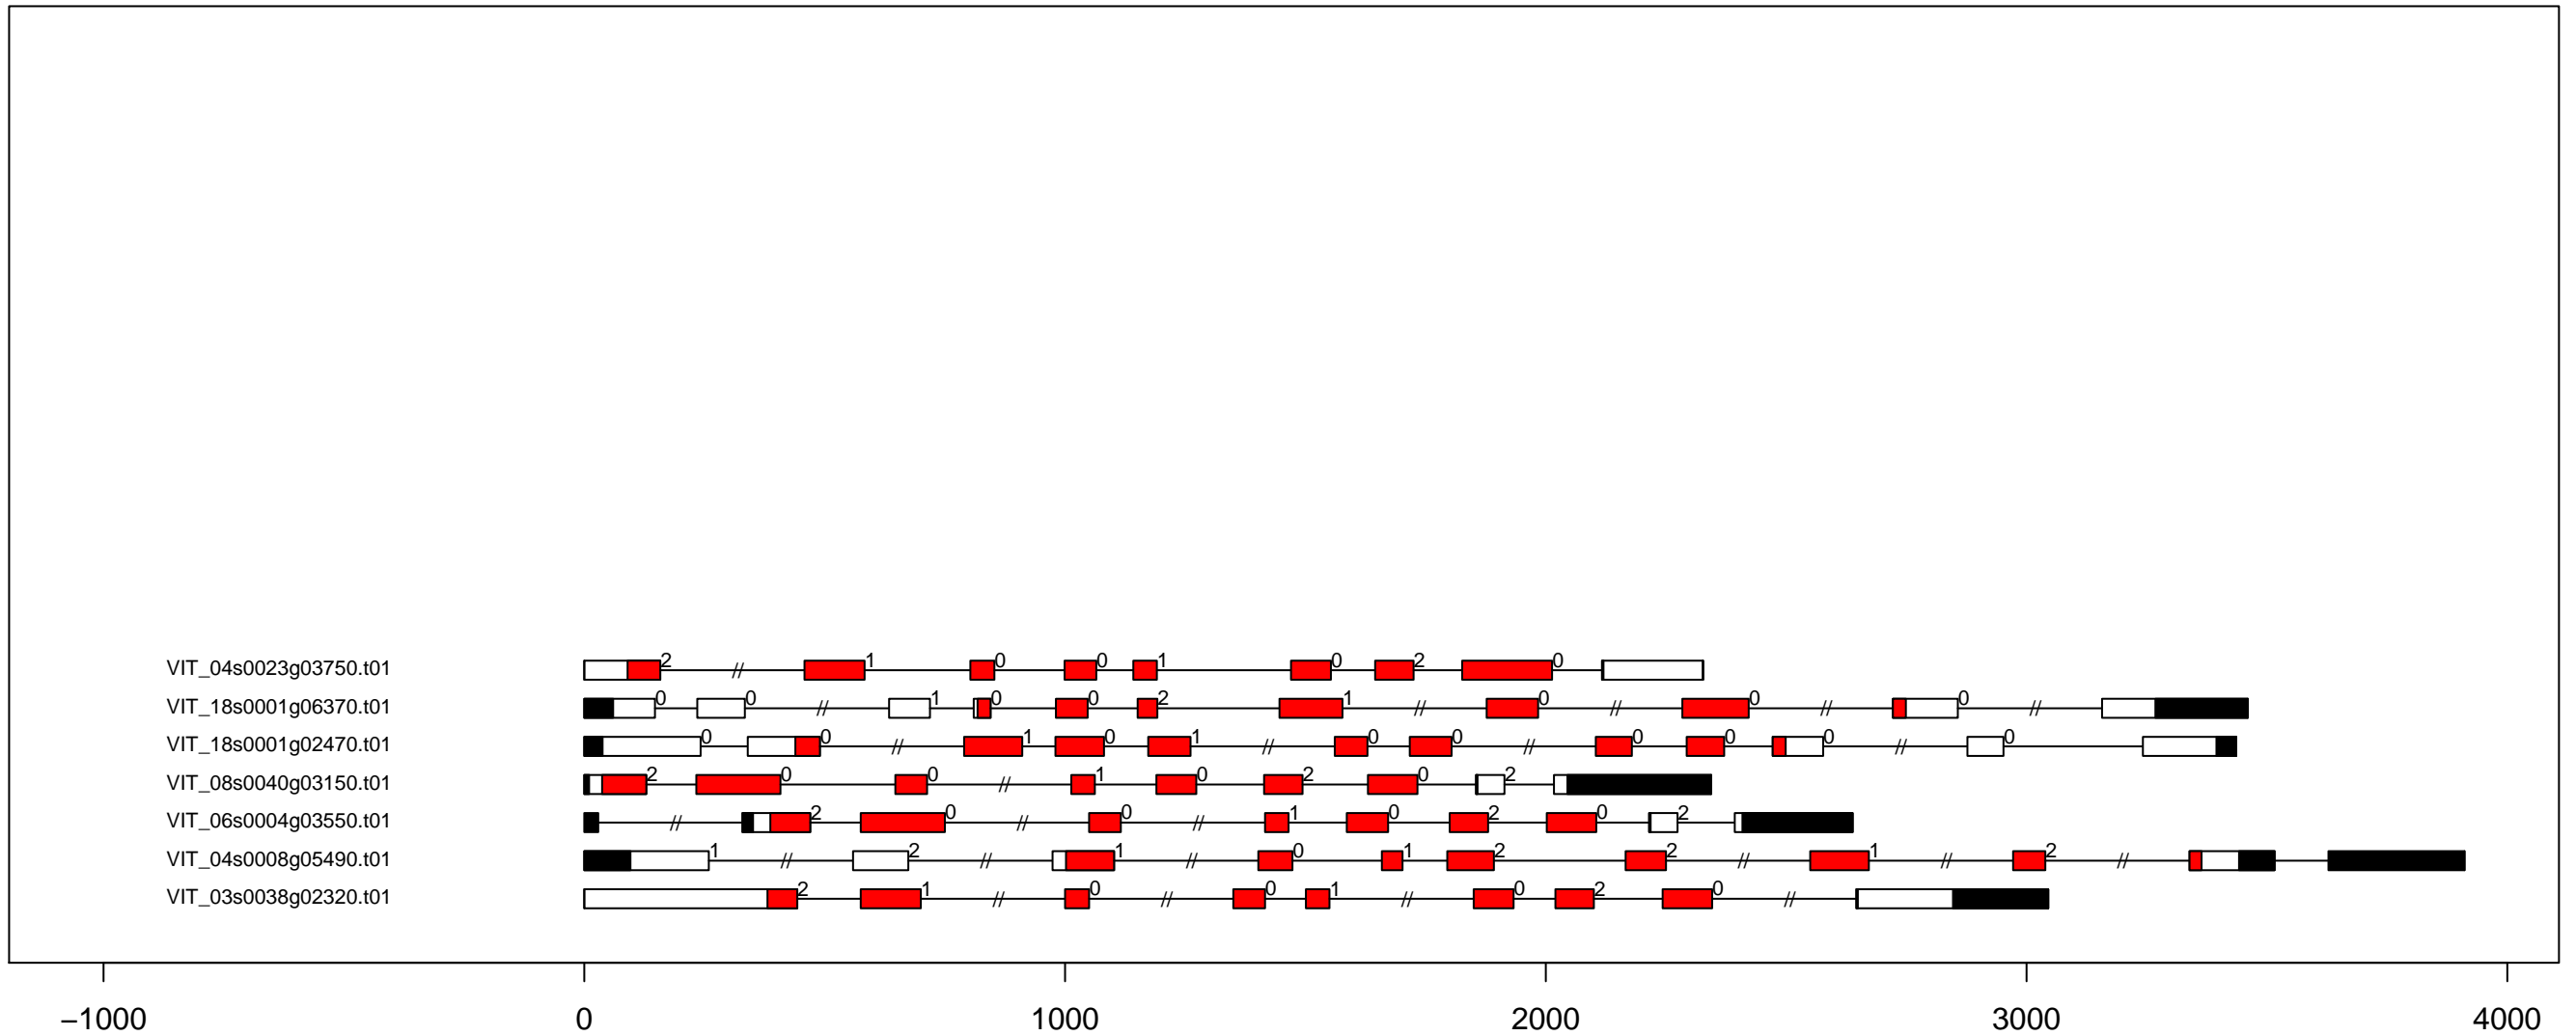



V.vi class III peroxidase X subfamily exon-intron and prx domain diagram (all)

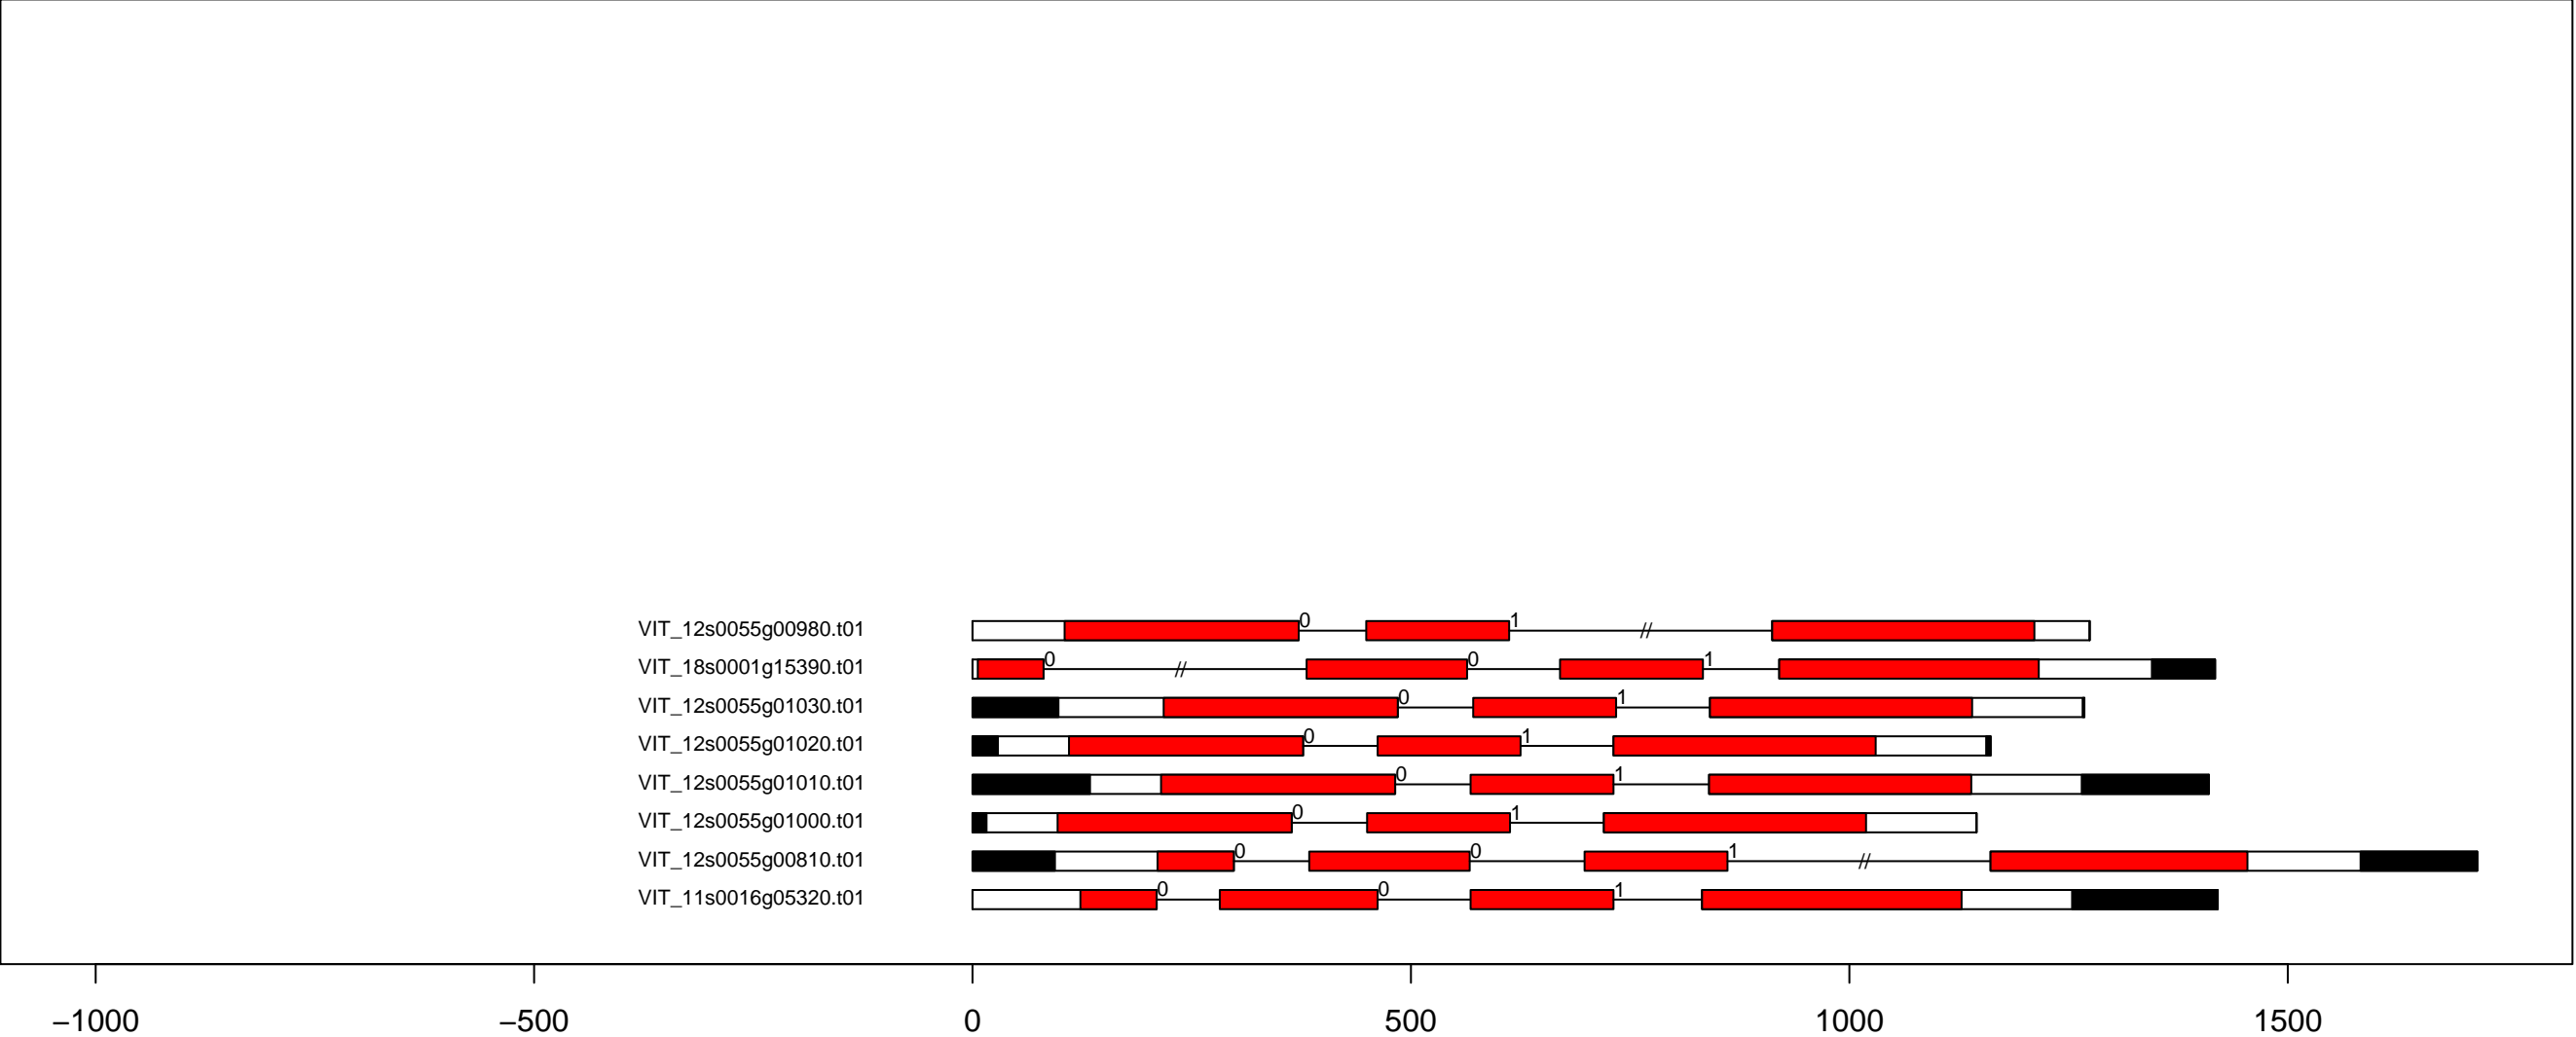

### V.vi class III peroxidase XII subfamily exon-intron and prx domain diagram (all)

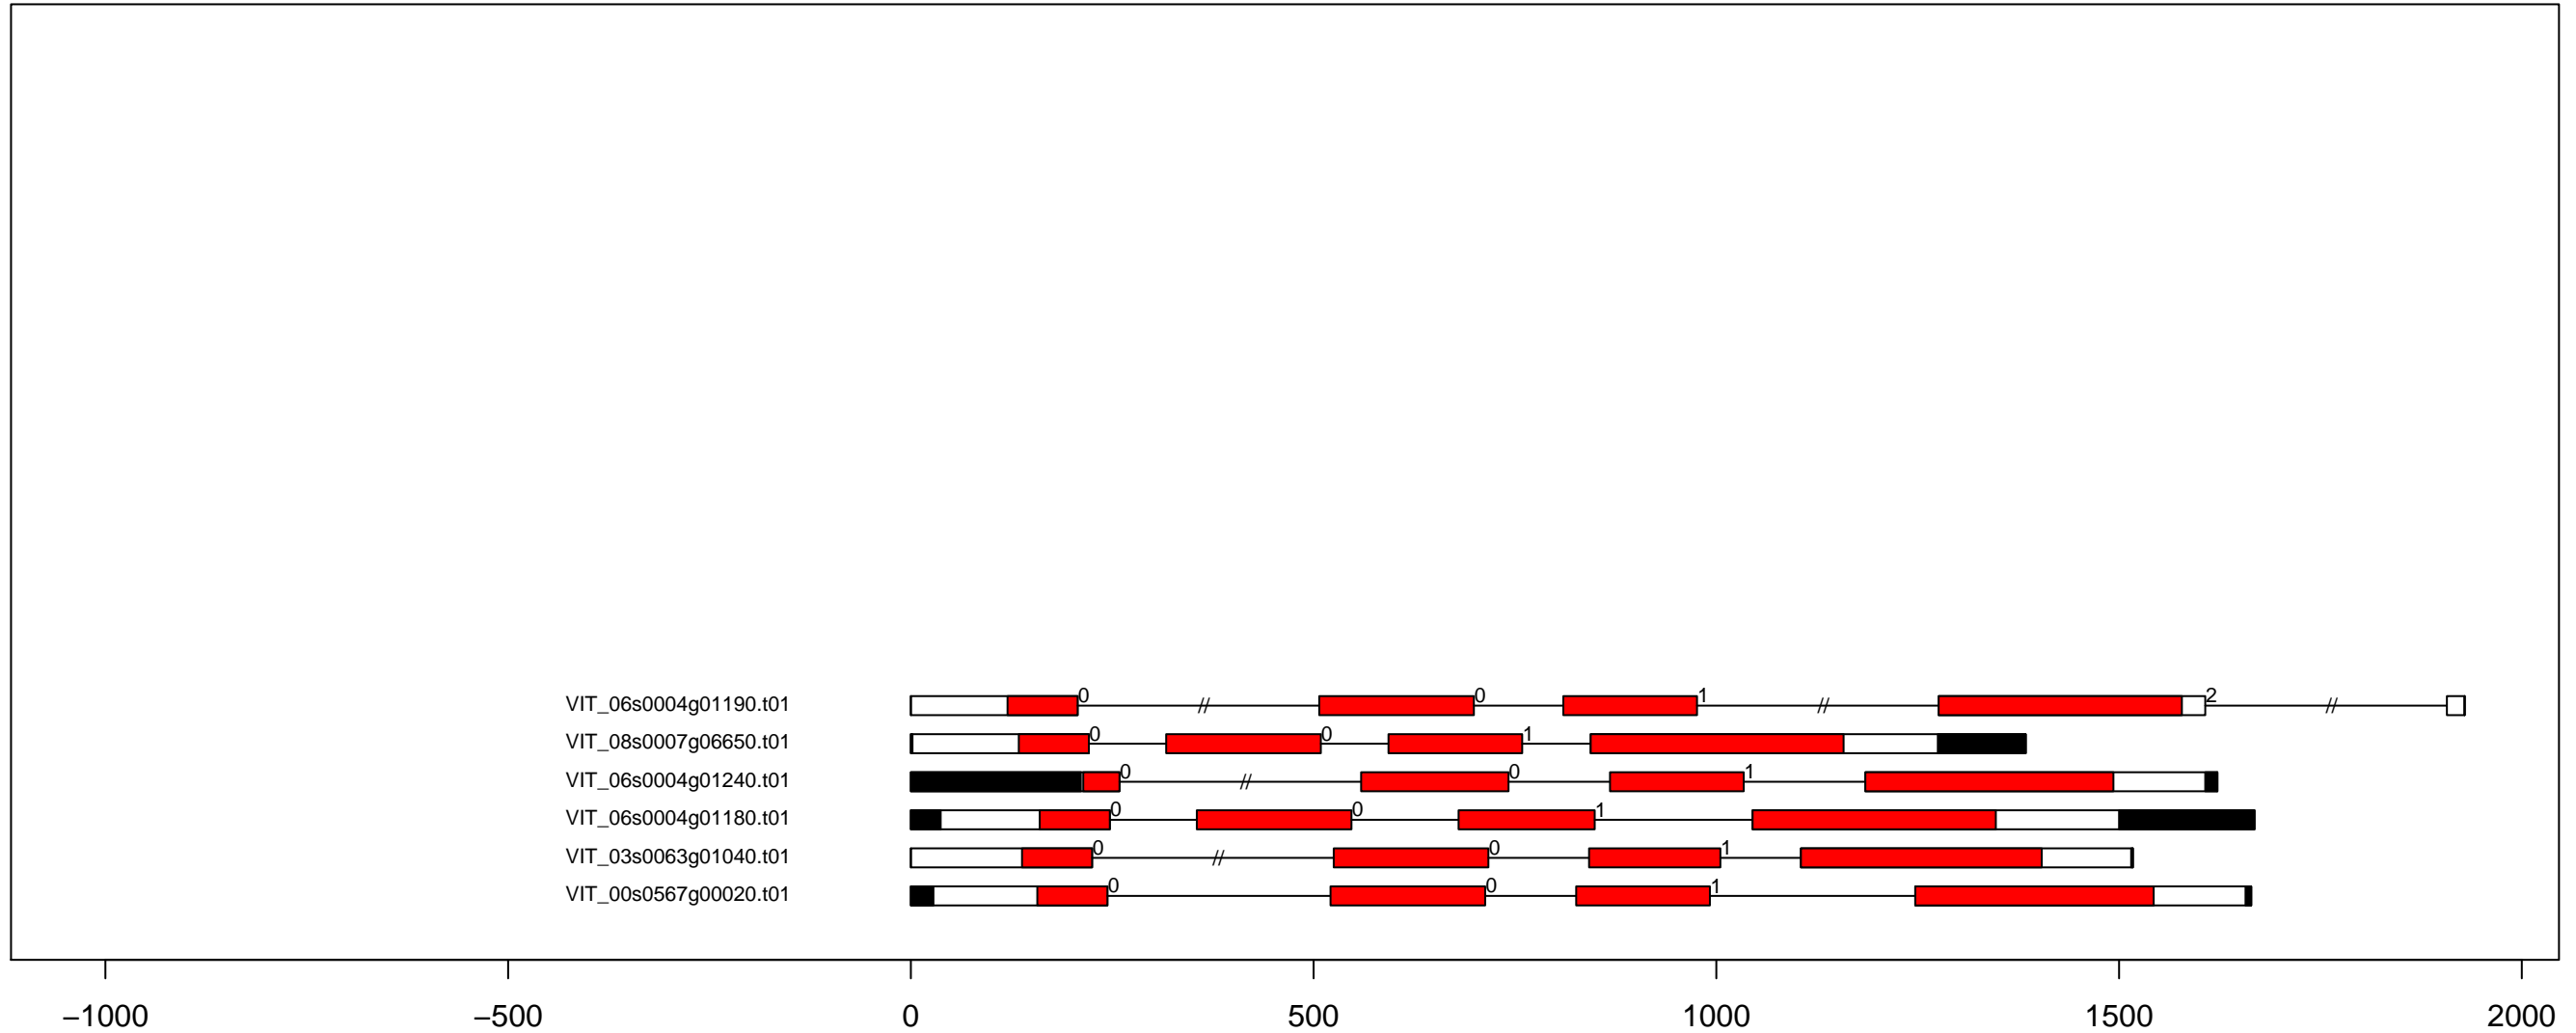

# V.vi class III peroxidase XIV subfamily exon-intron and prx domain diagram (all)

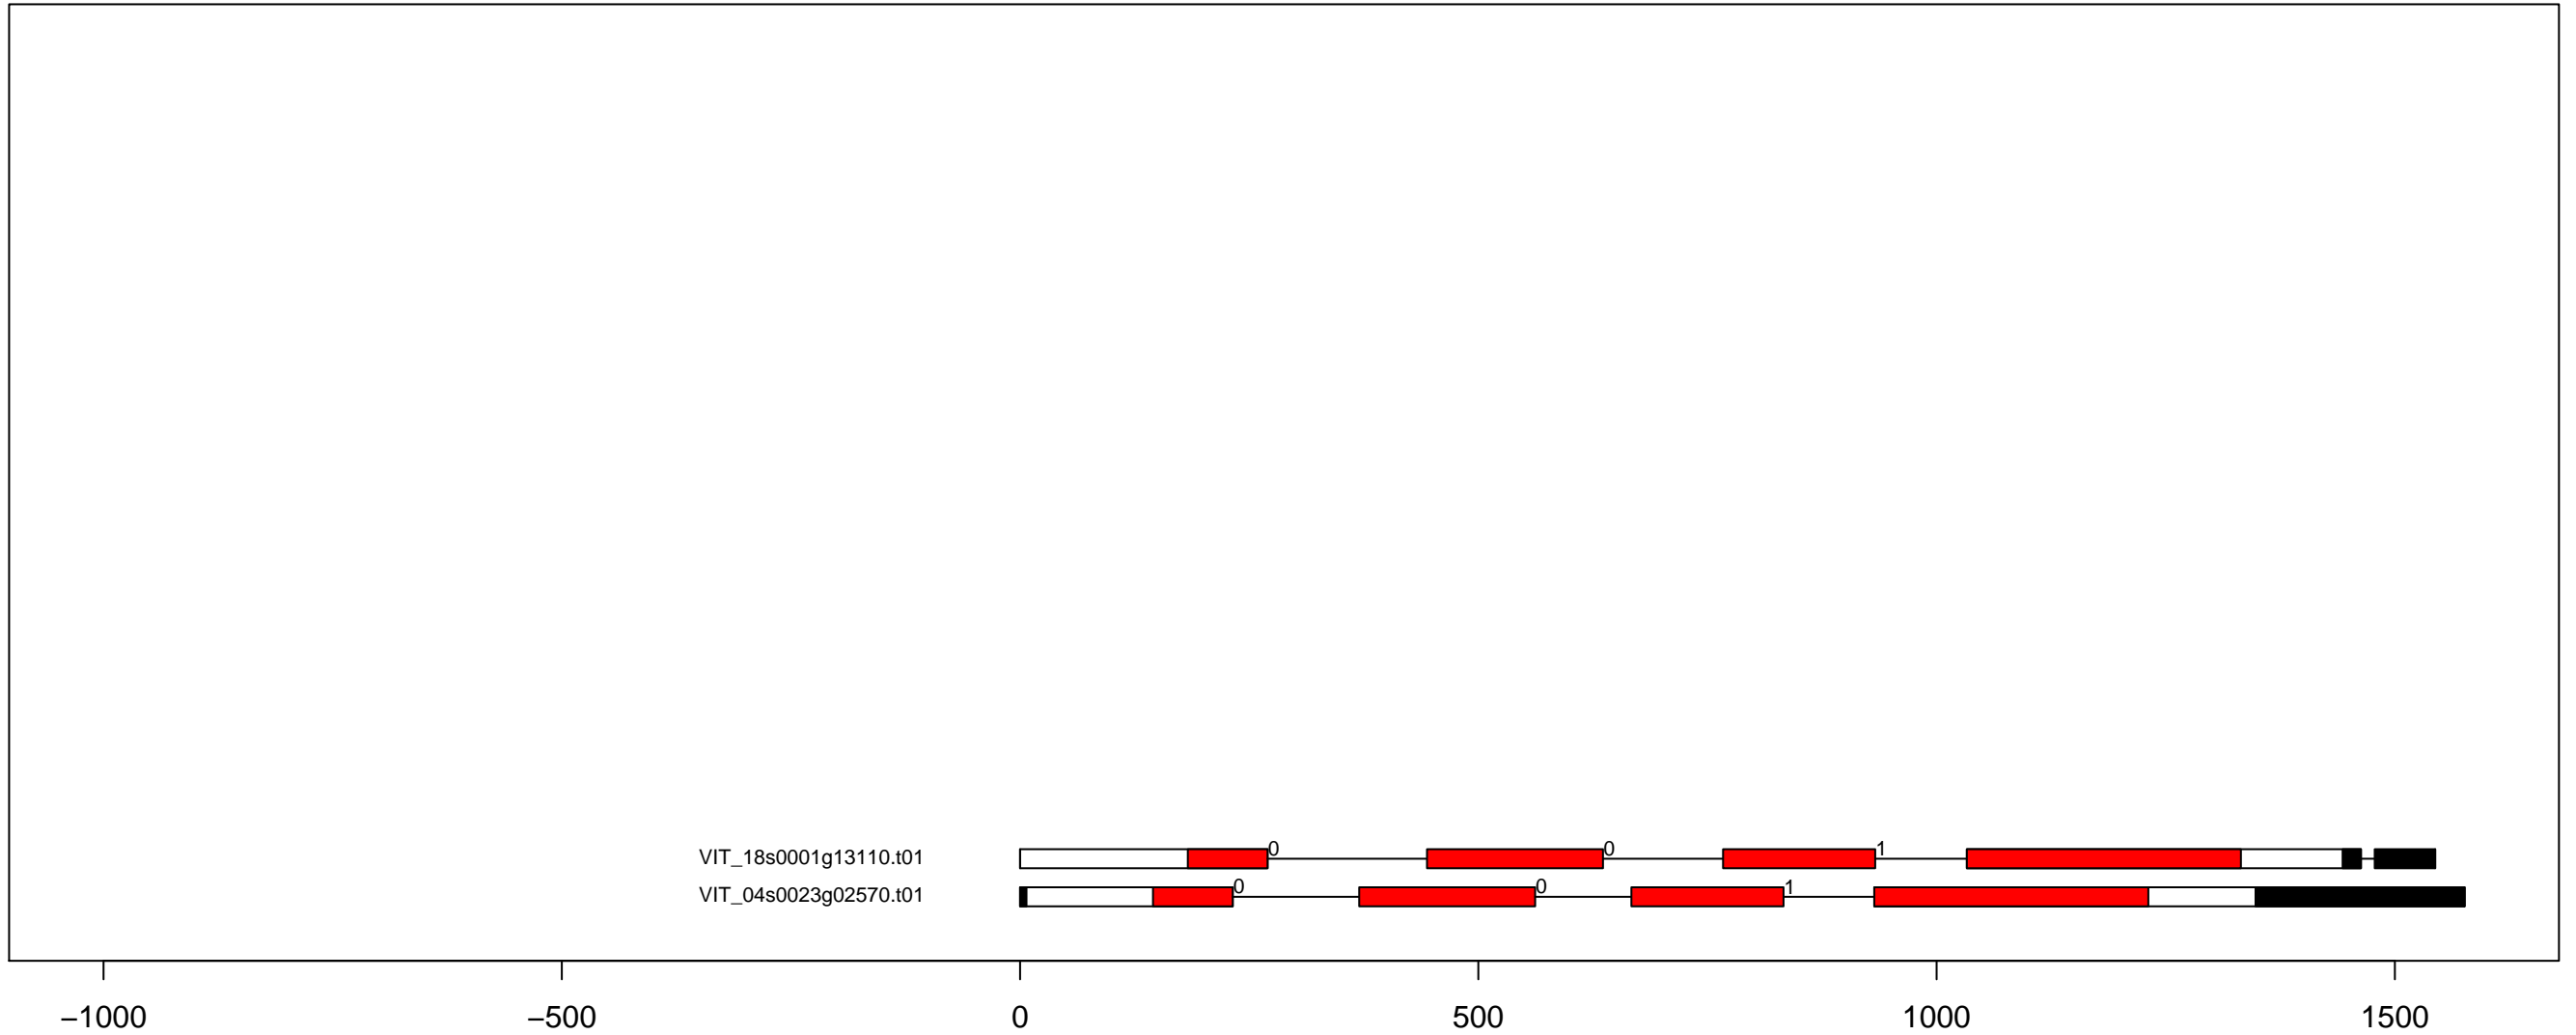

V.vi class III peroxidase XV subfamily exon-intron and prx domain diagram (all)

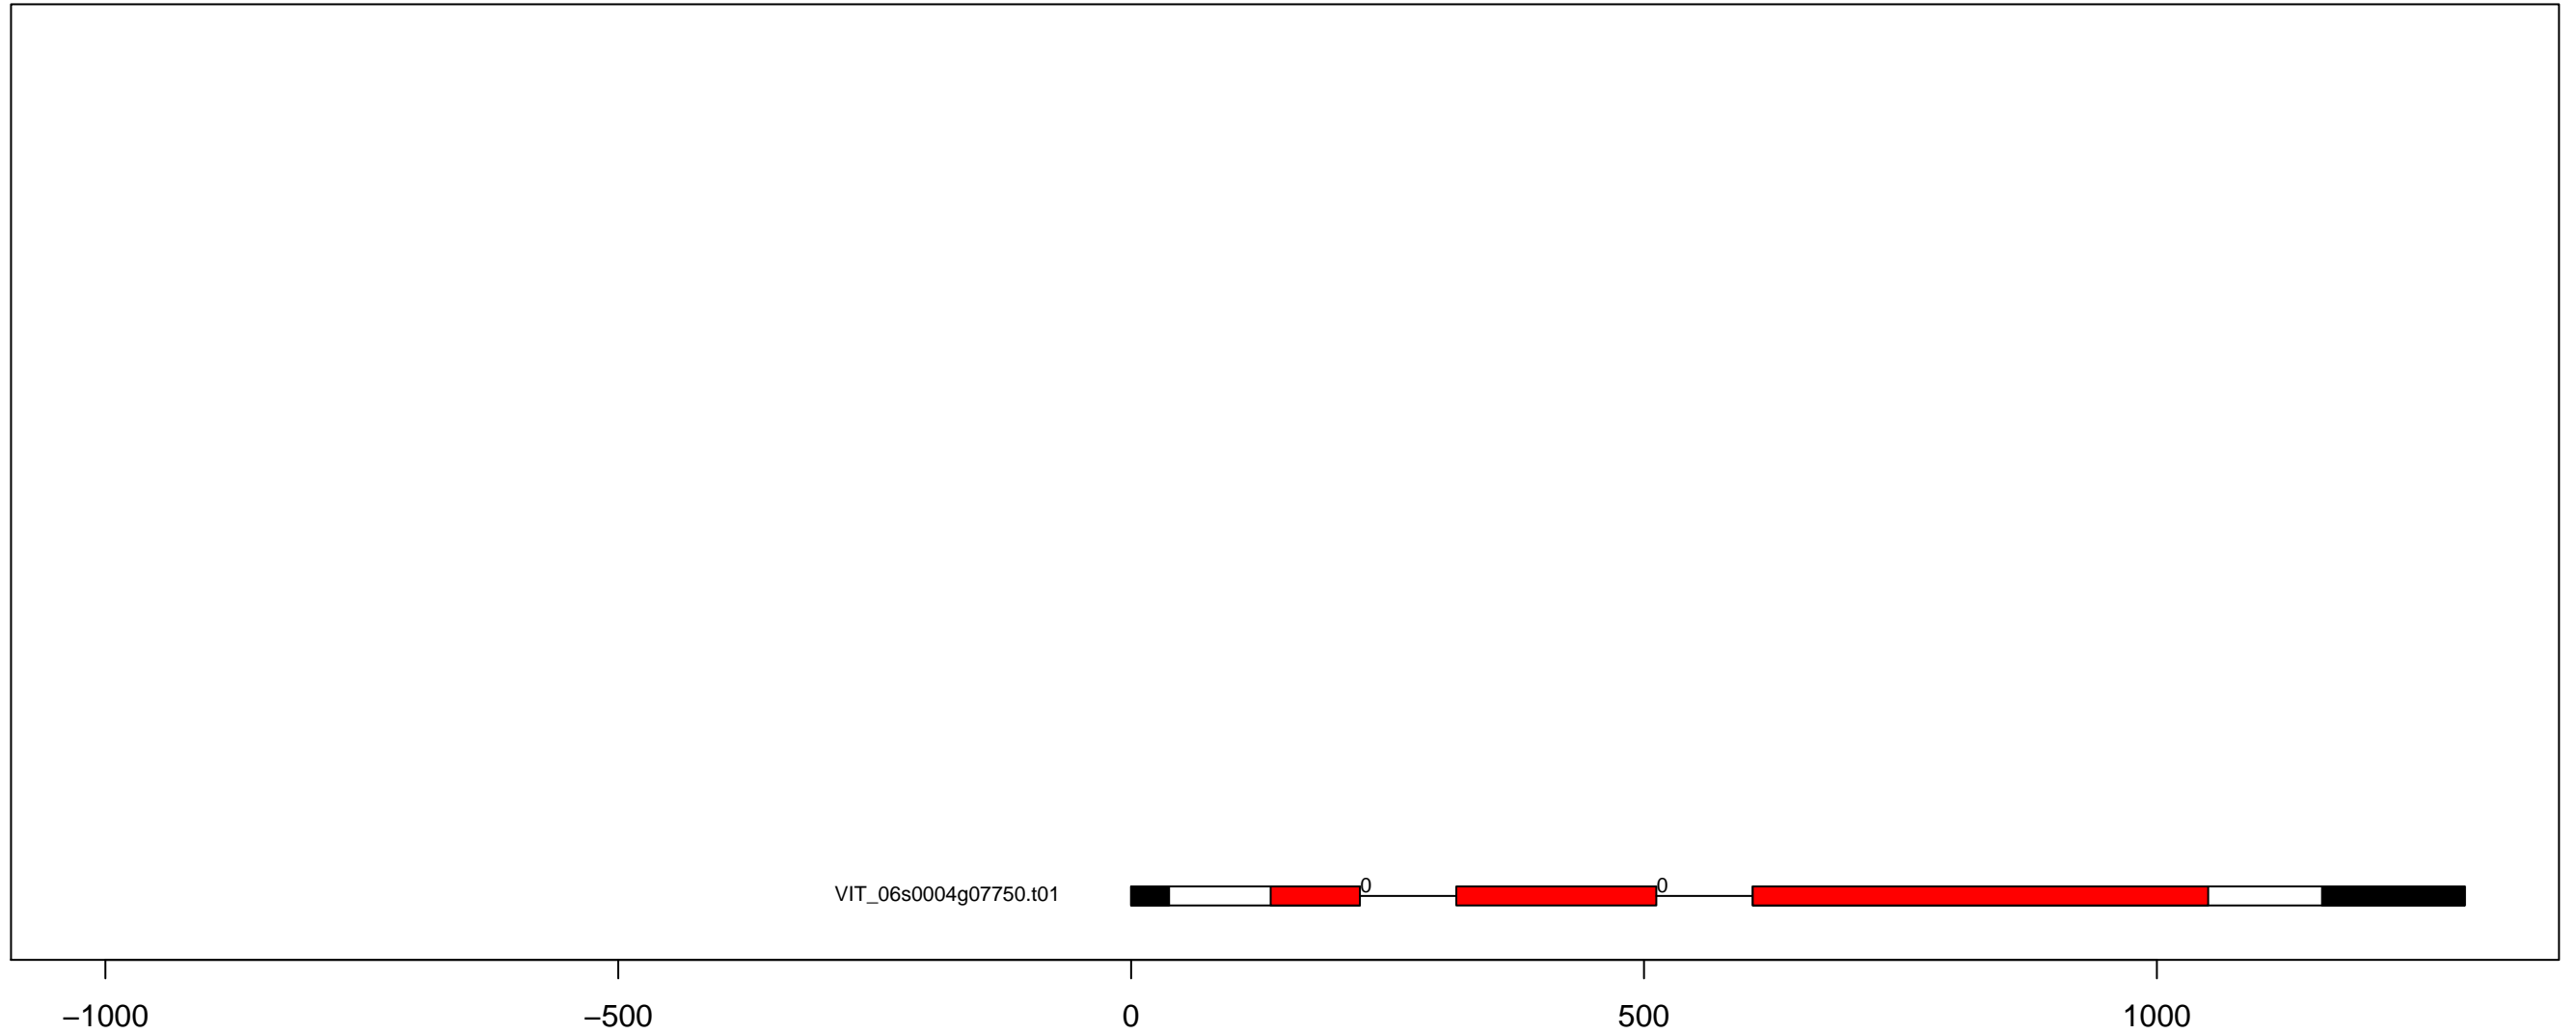

# V.vi class III peroxidase XVI subfamily exon-intron and prx domain diagram (all)

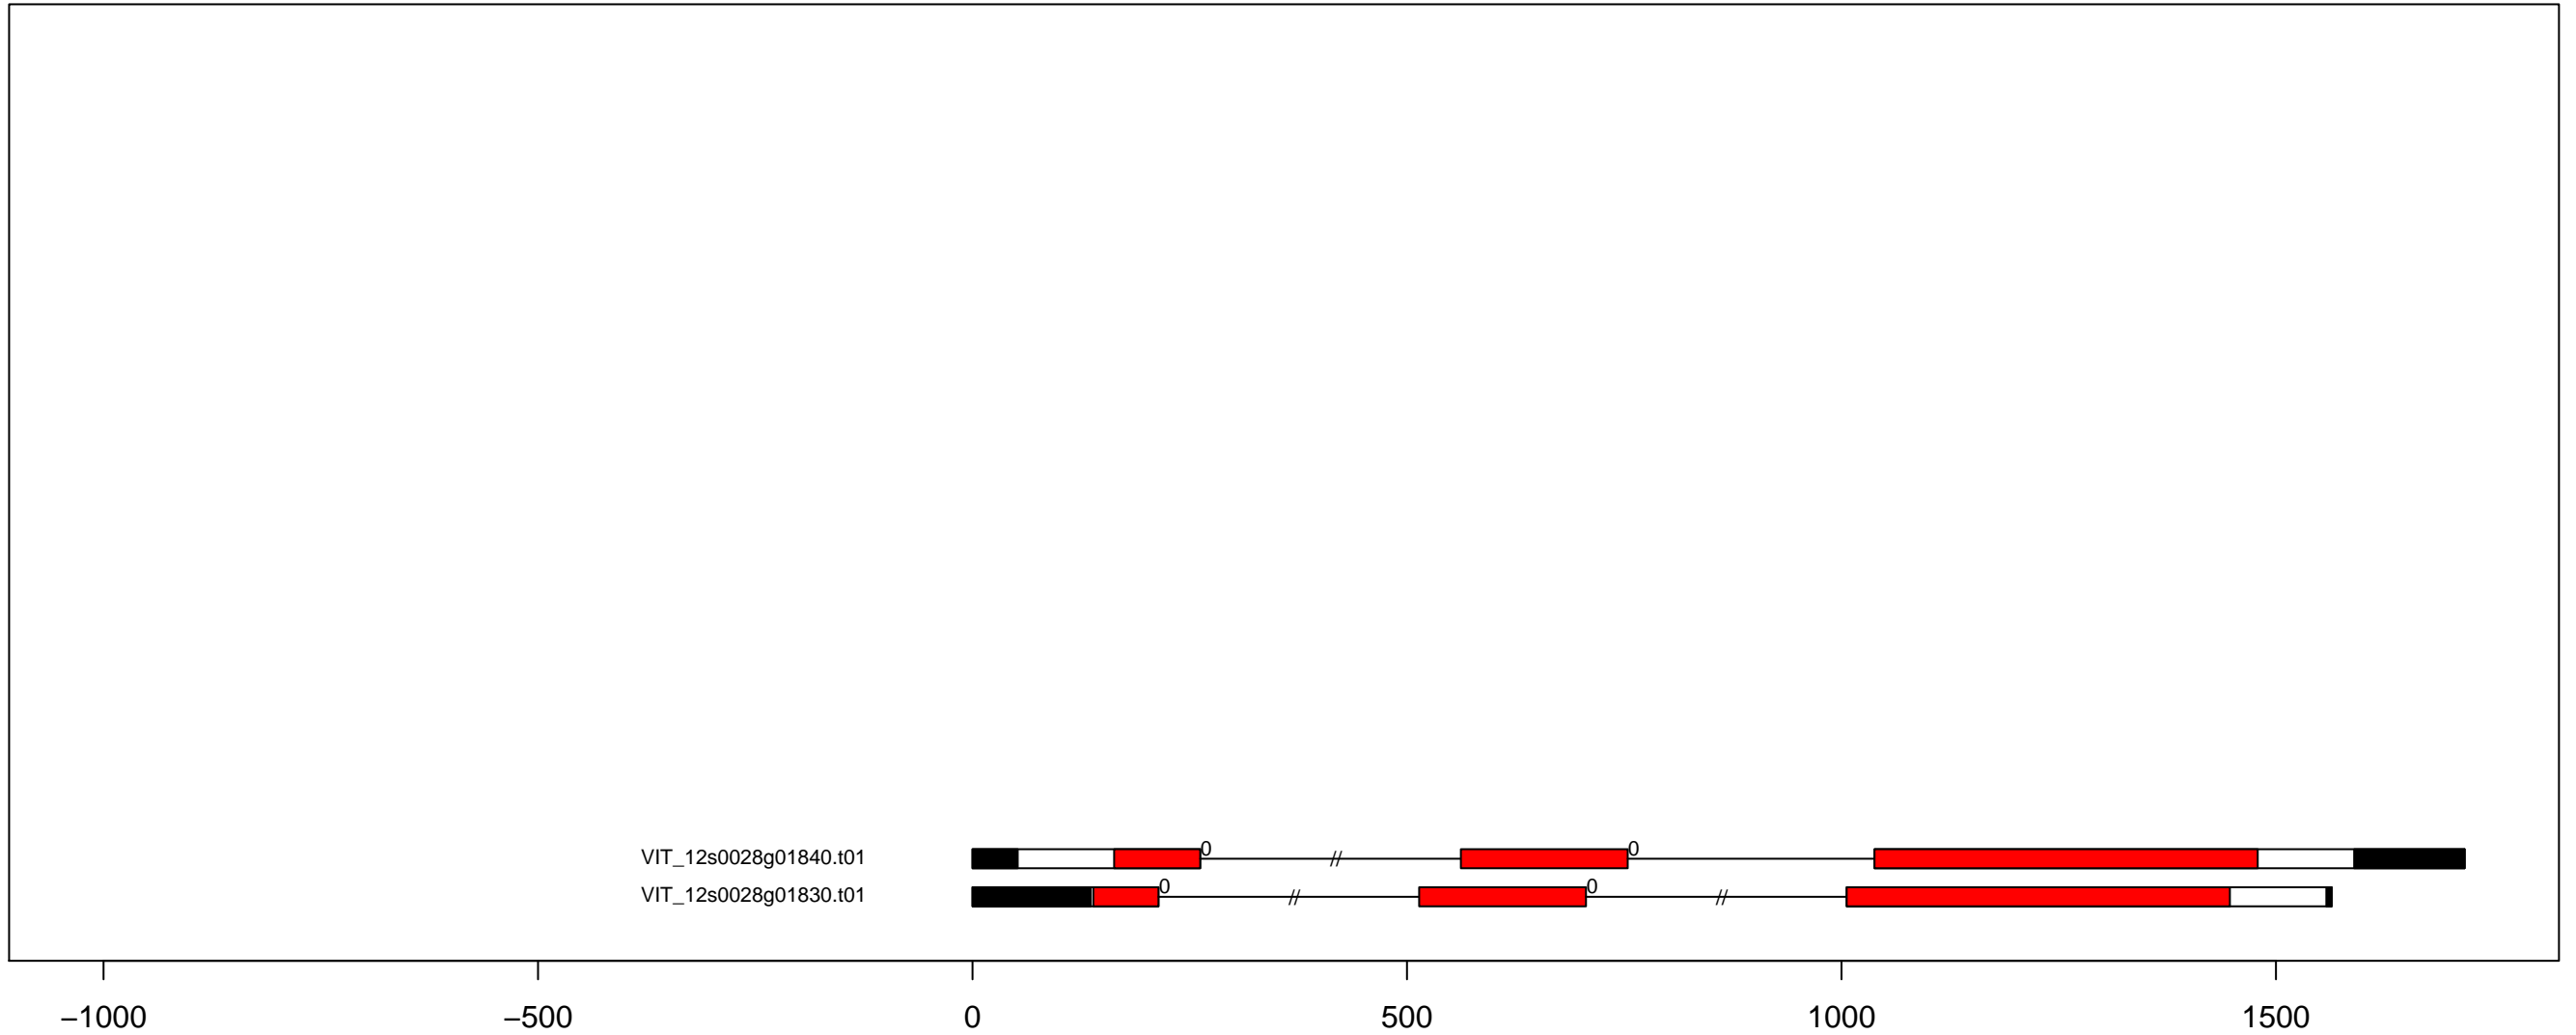



### V.vi class III peroxidase XVII subfamily exon-intron and prx domain diagram (all)

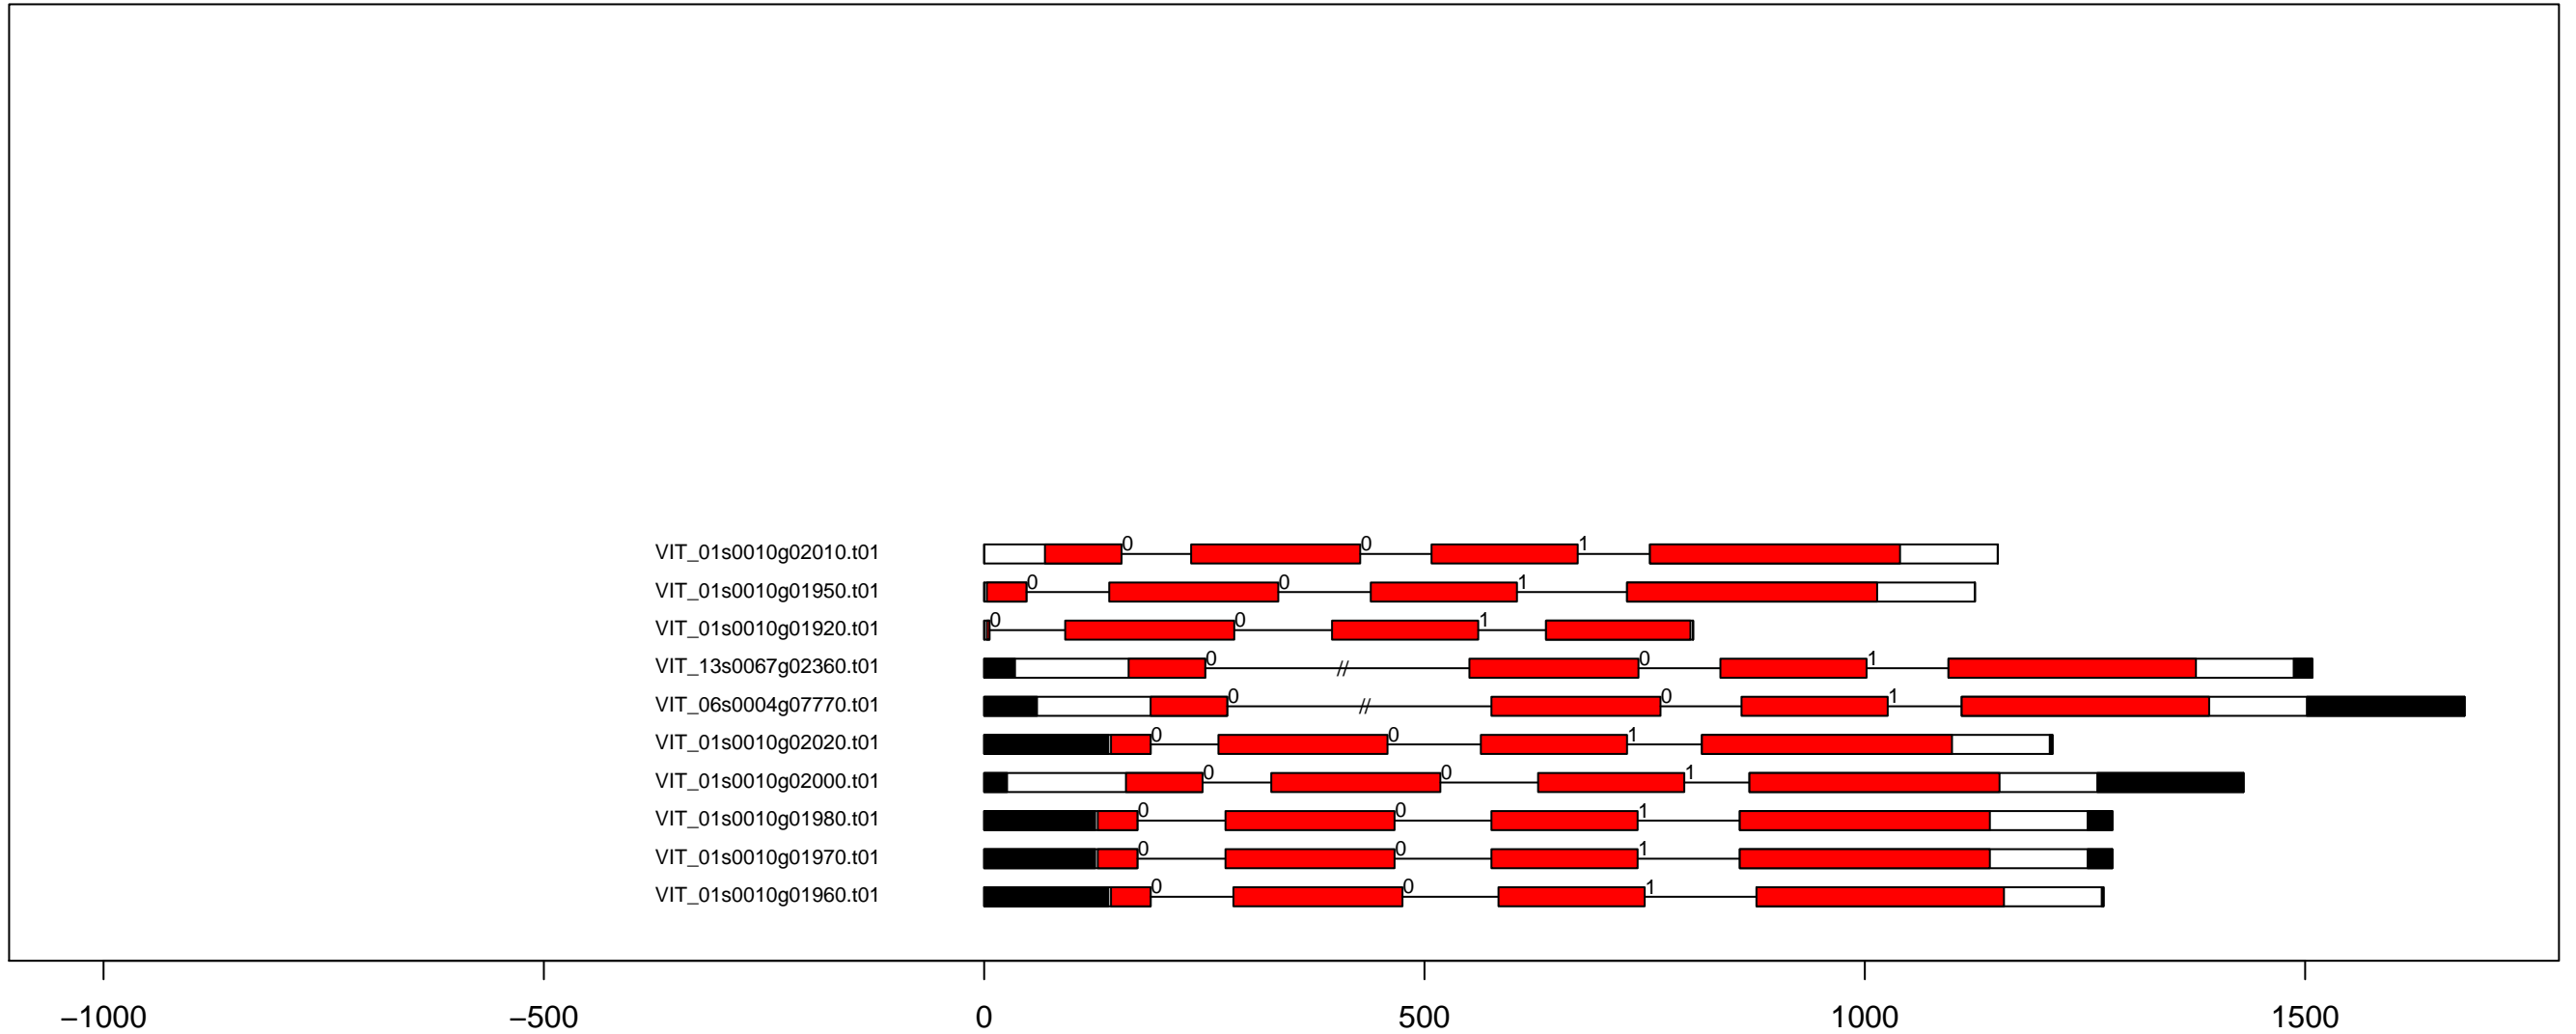

# V.vi class III peroxidase XVIII subfamily exon-intron and prx domain diagram (all)

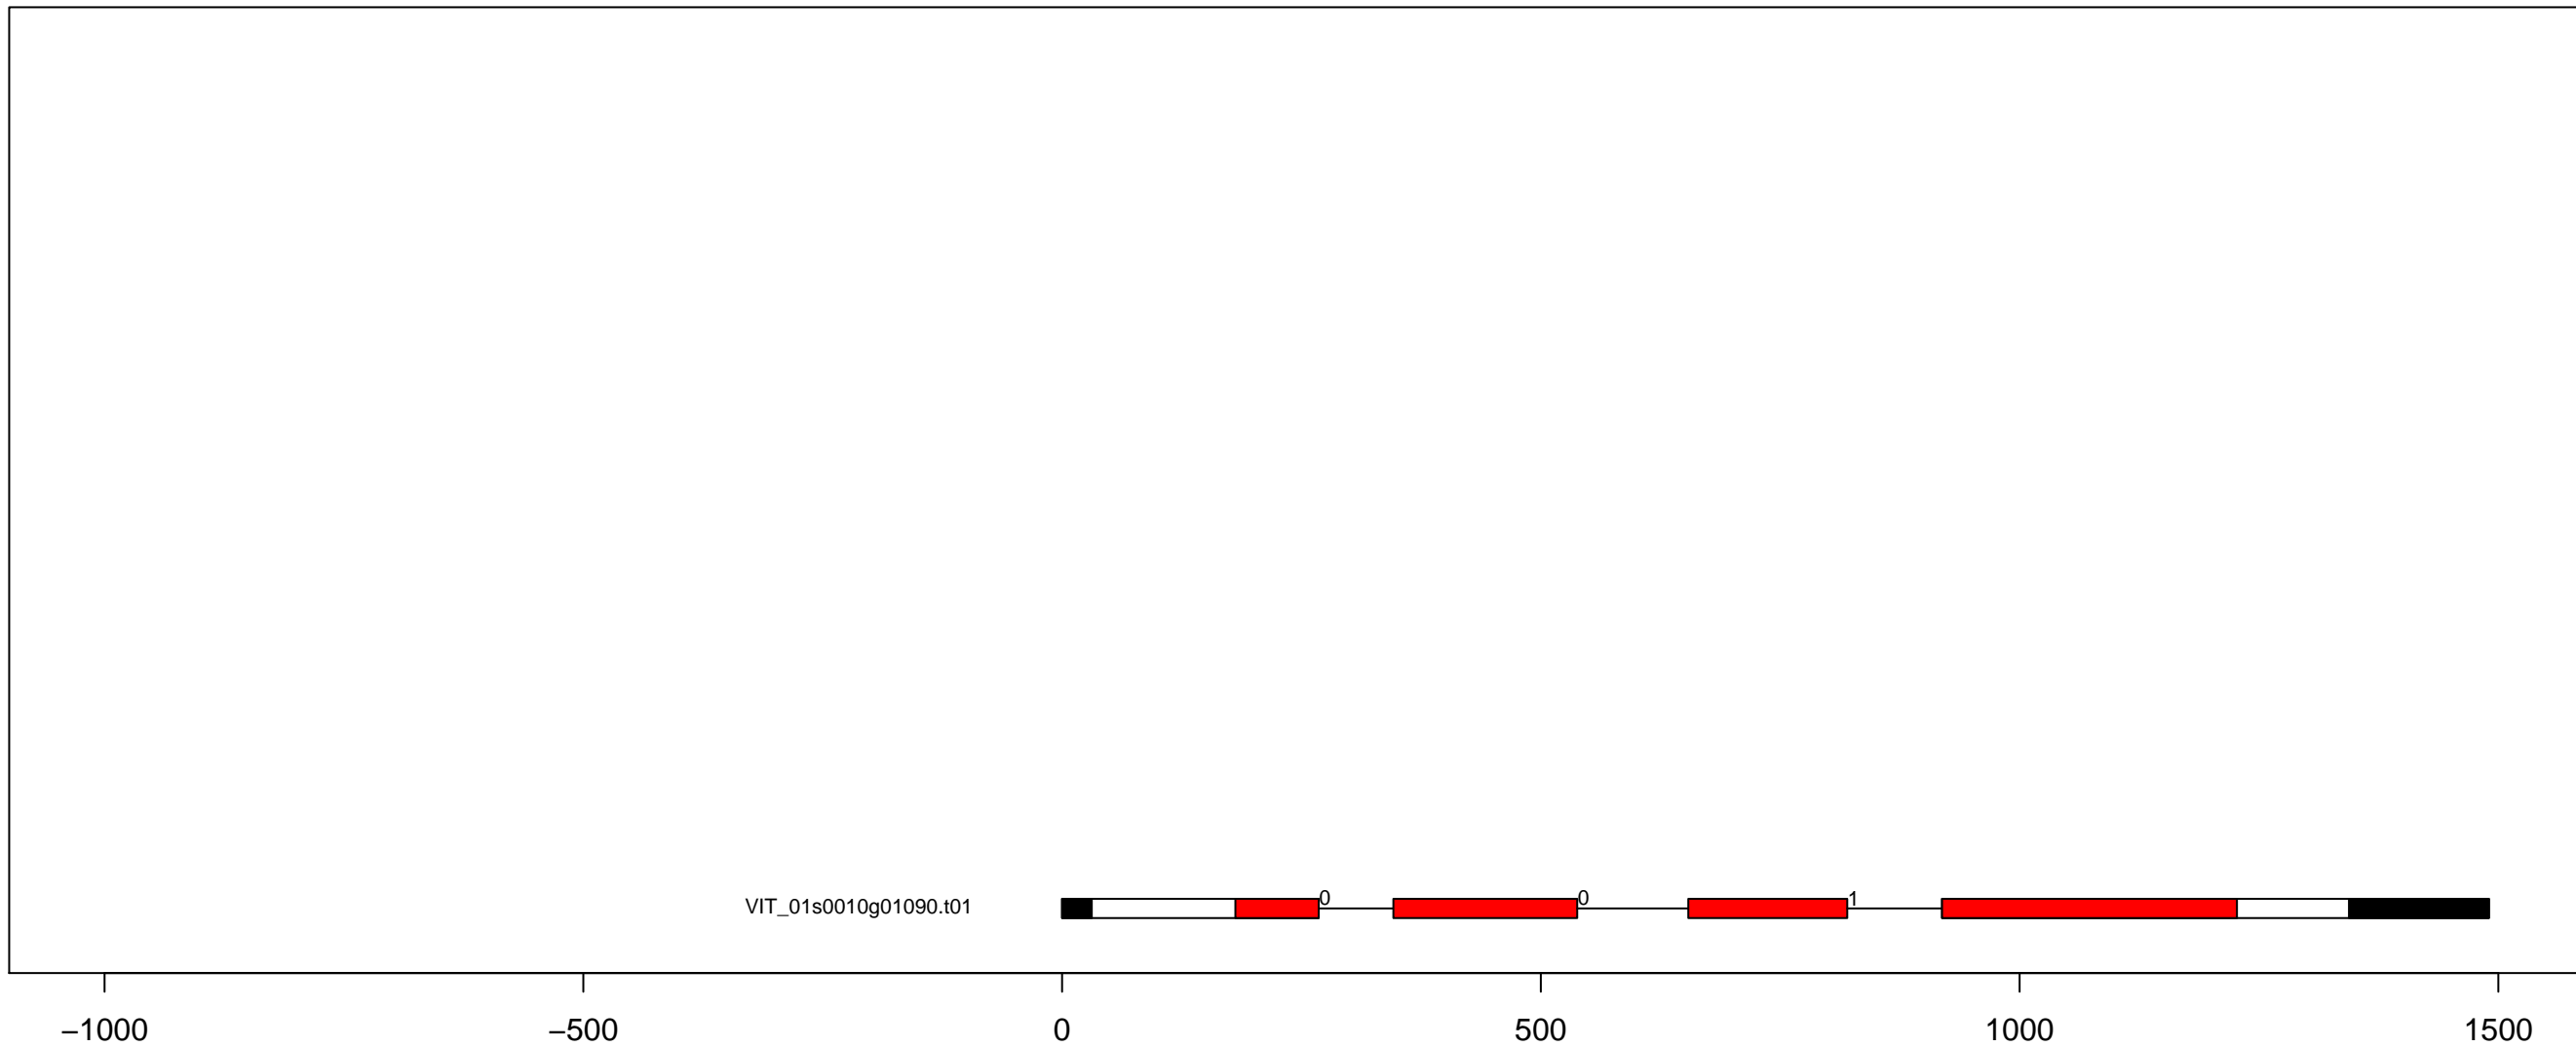

### V.vi class III peroxidase unclar\_classification subfamily exon-intron and prx domain diagram (all)

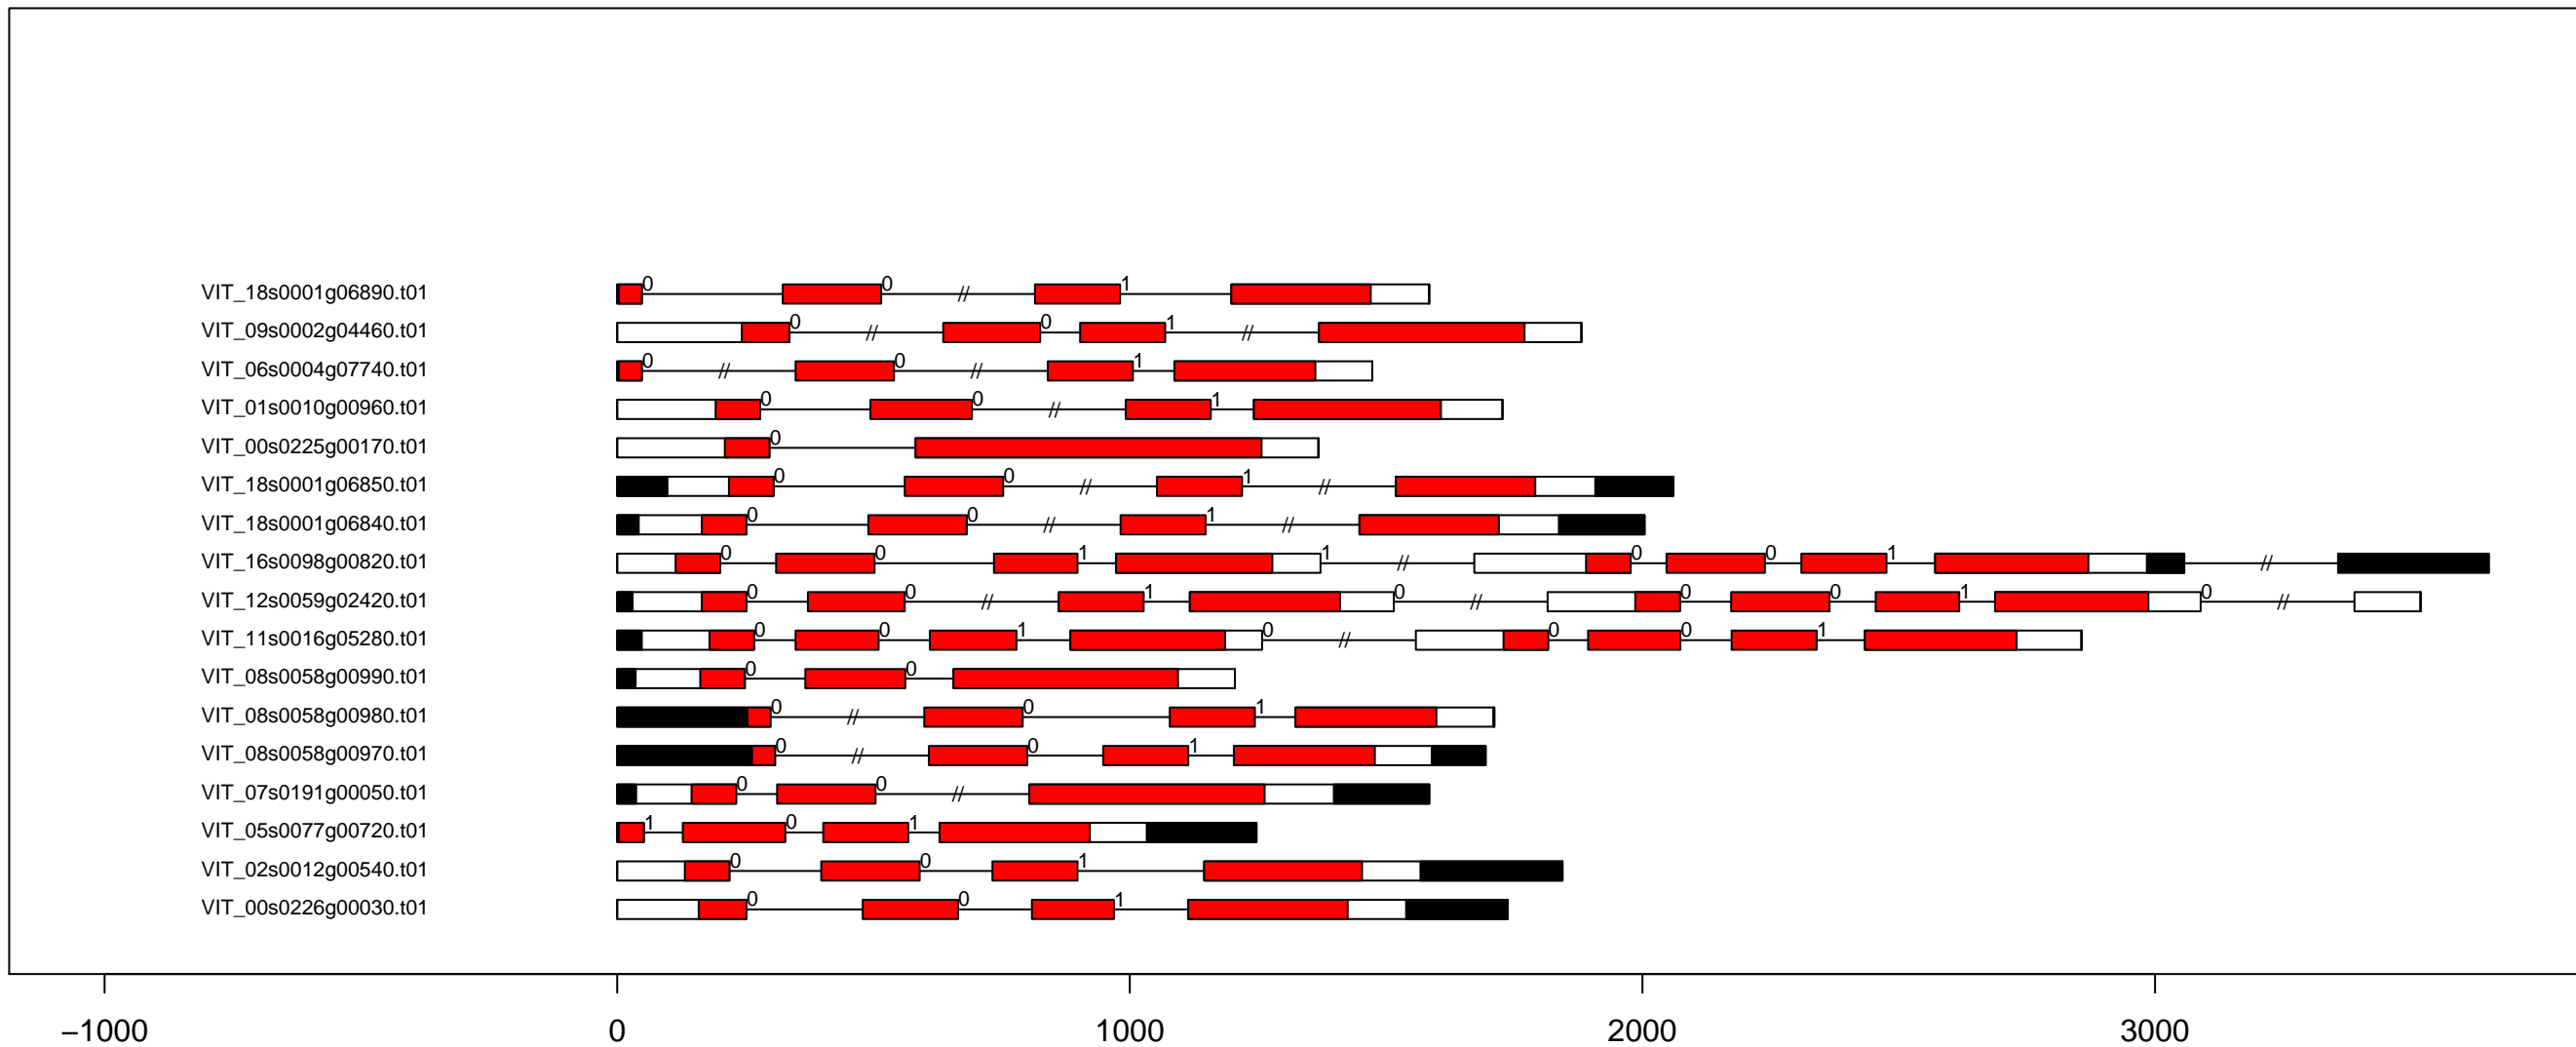

### S.mo class III peroxidase I subfamily exon-intron and prx domain diagram (part 1)

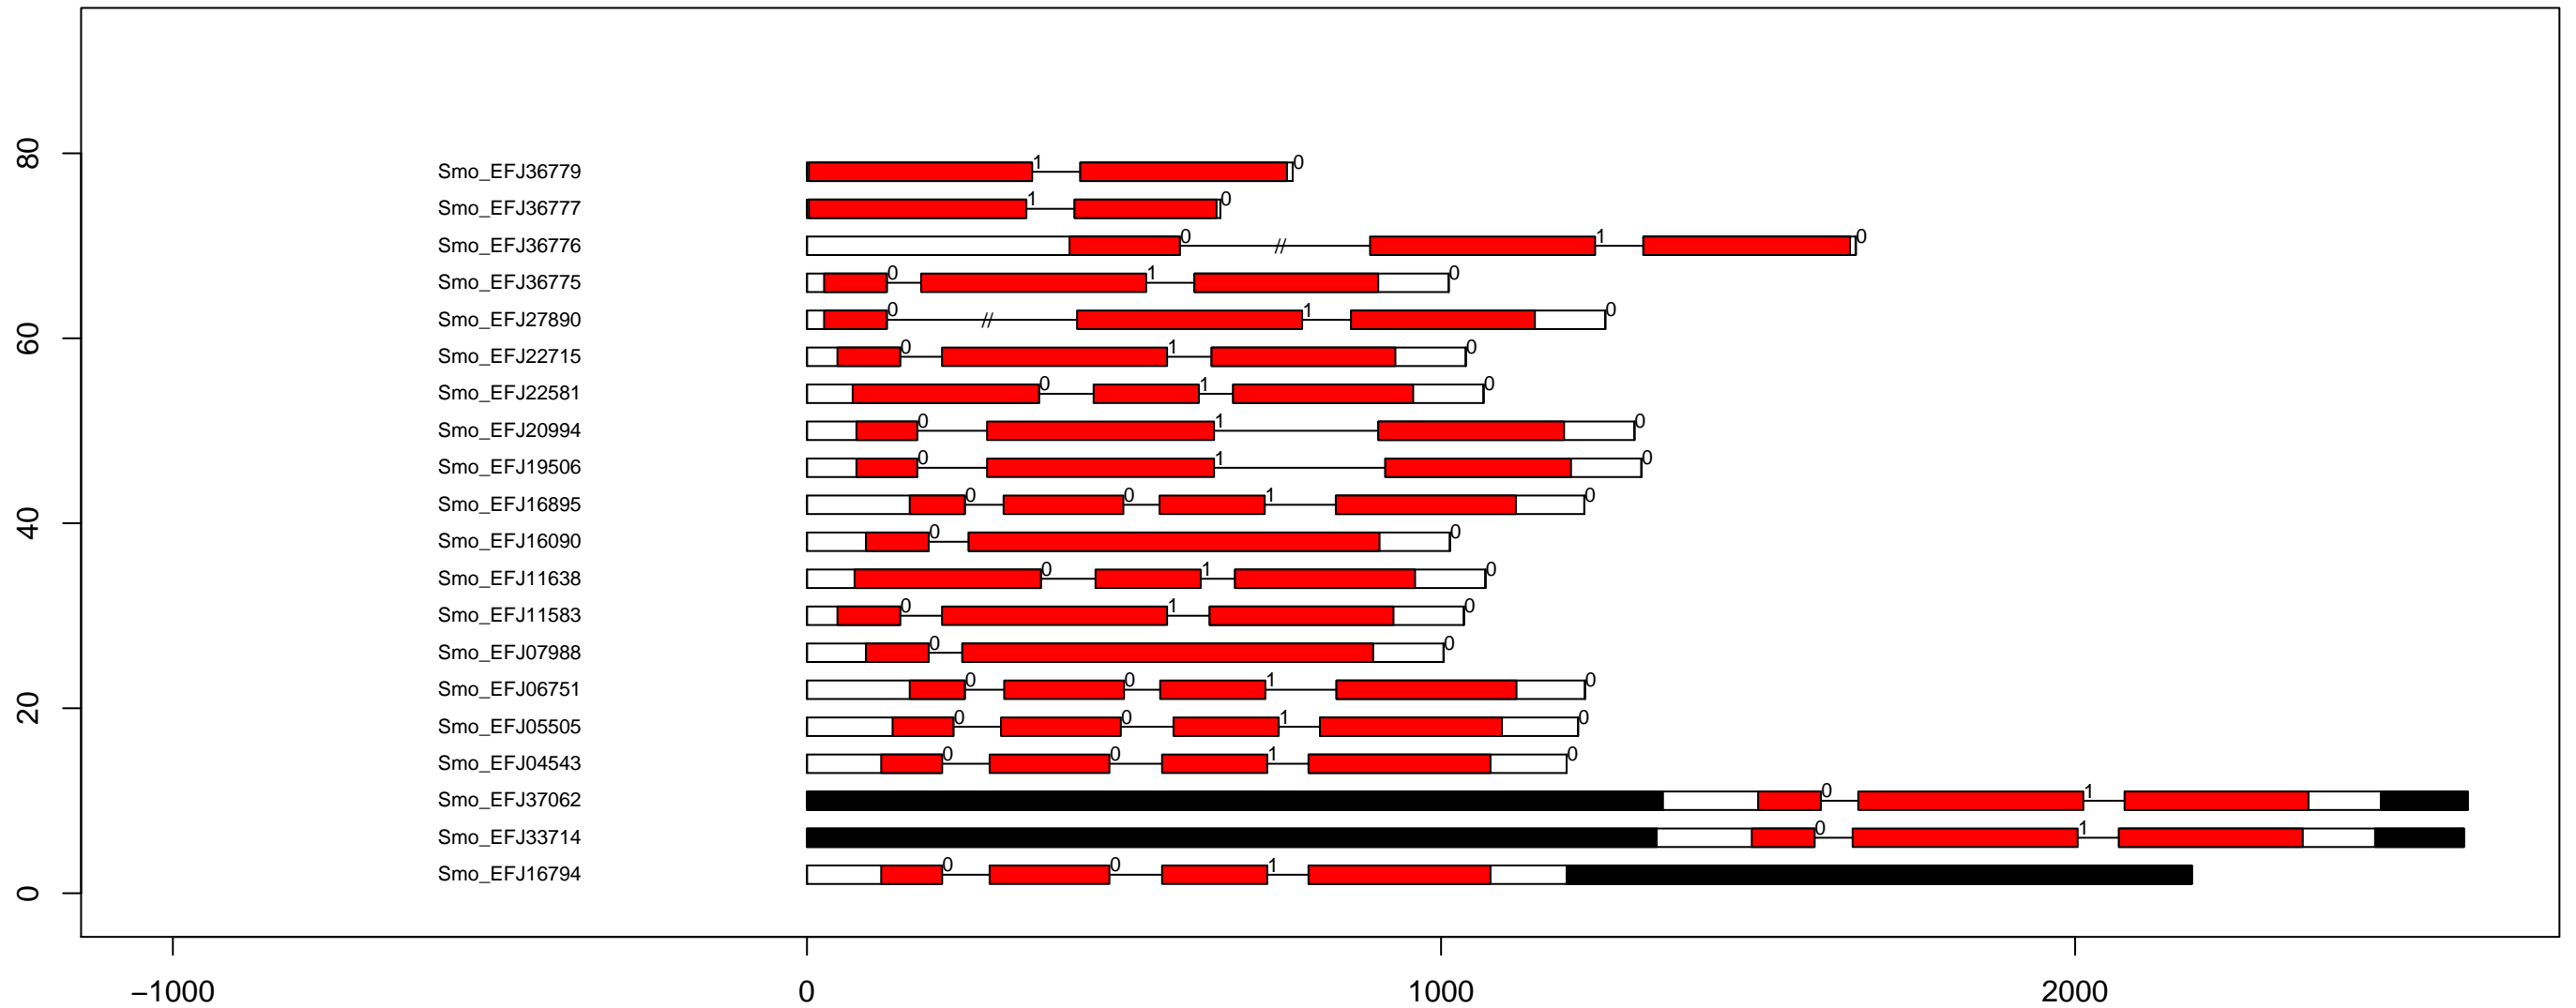

# S.mo class III peroxidase I subfamily exon-intron and prx domain diagram (part 2)

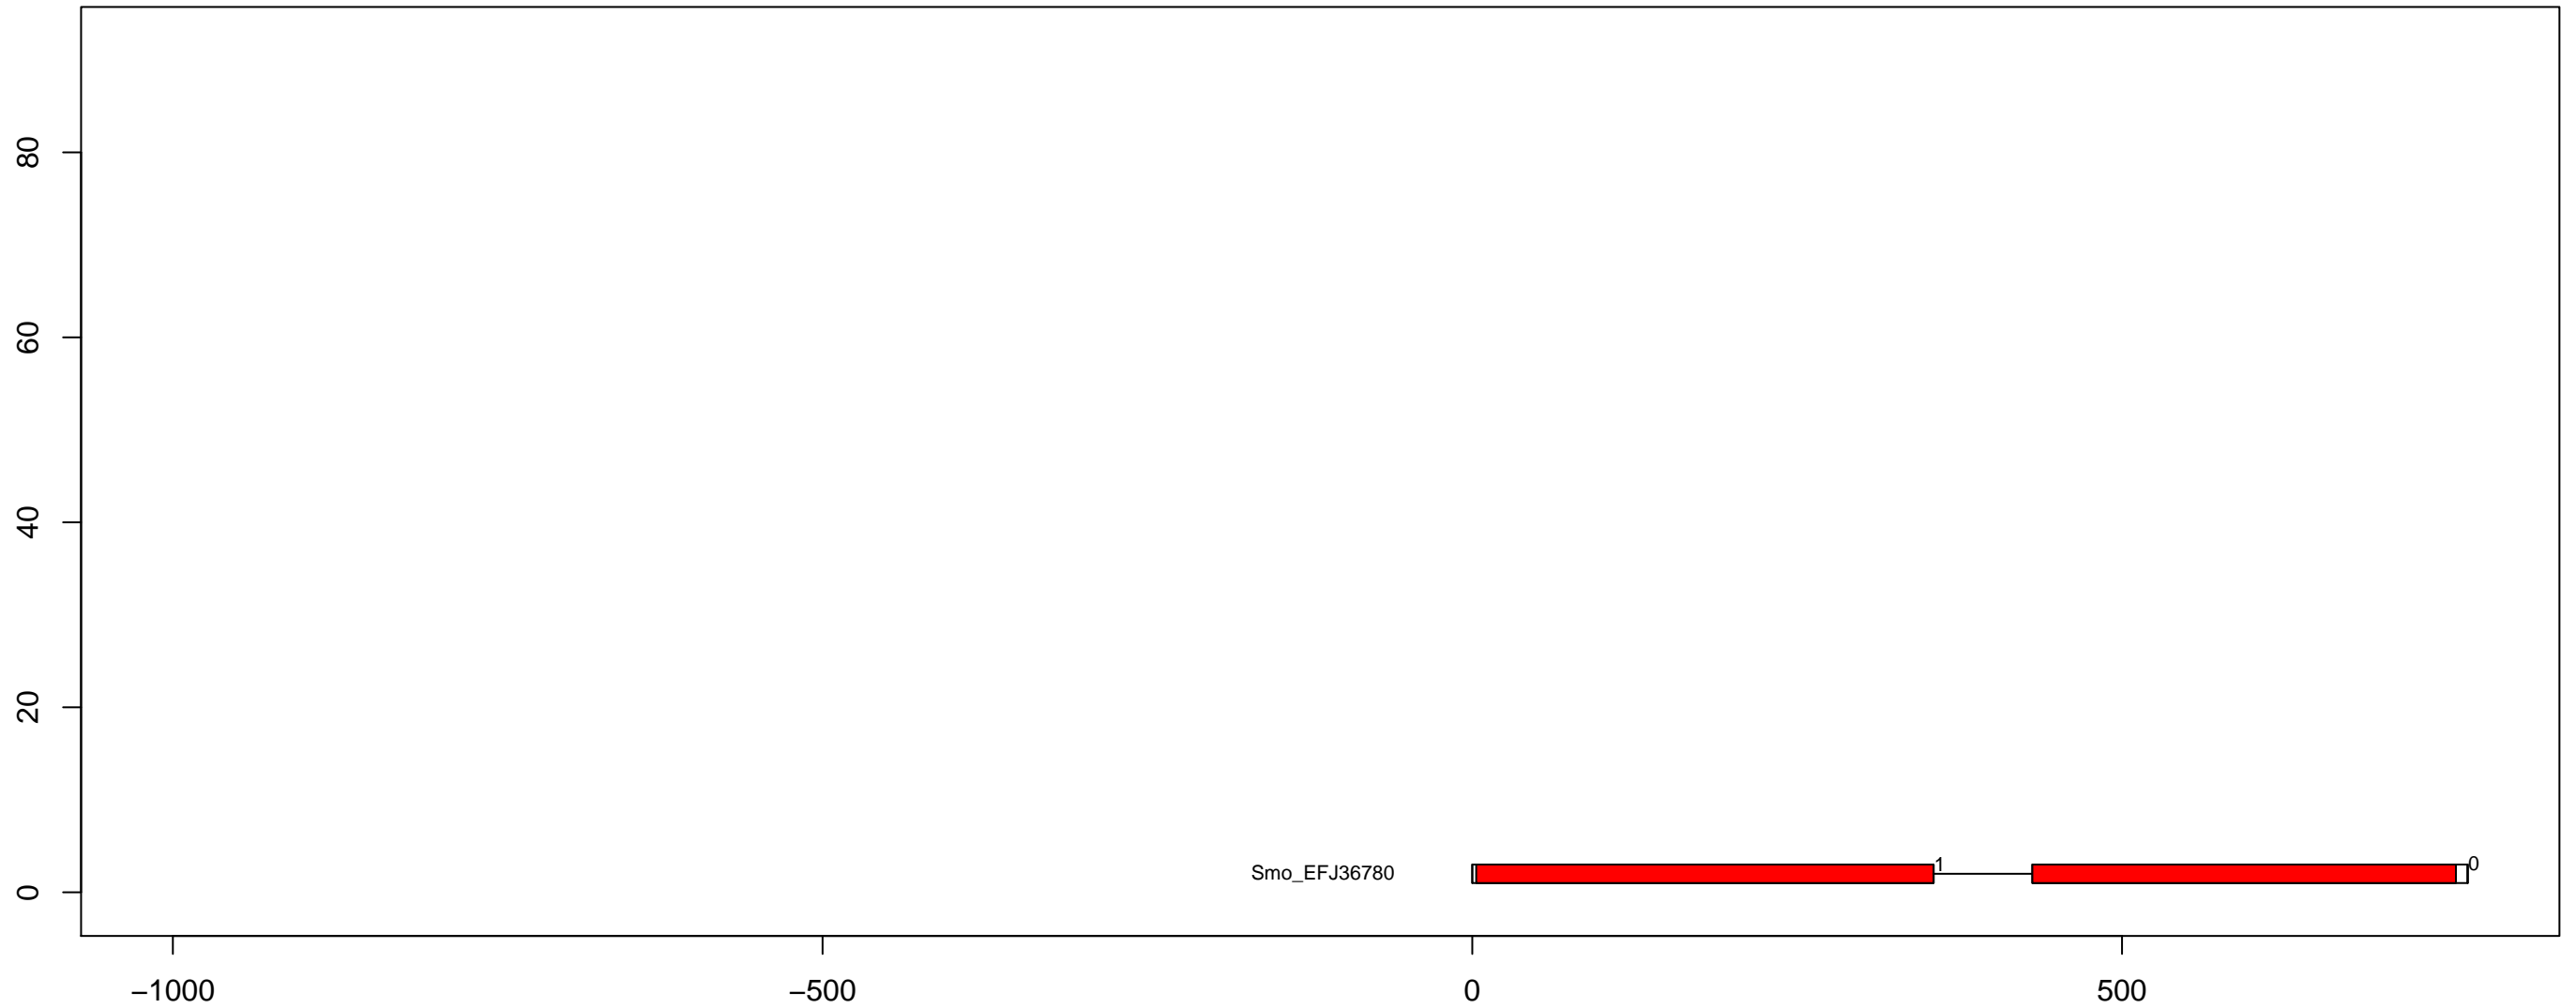

# S.mo class III peroxidase V subfamily exon-intron and prx domain diagram (all)

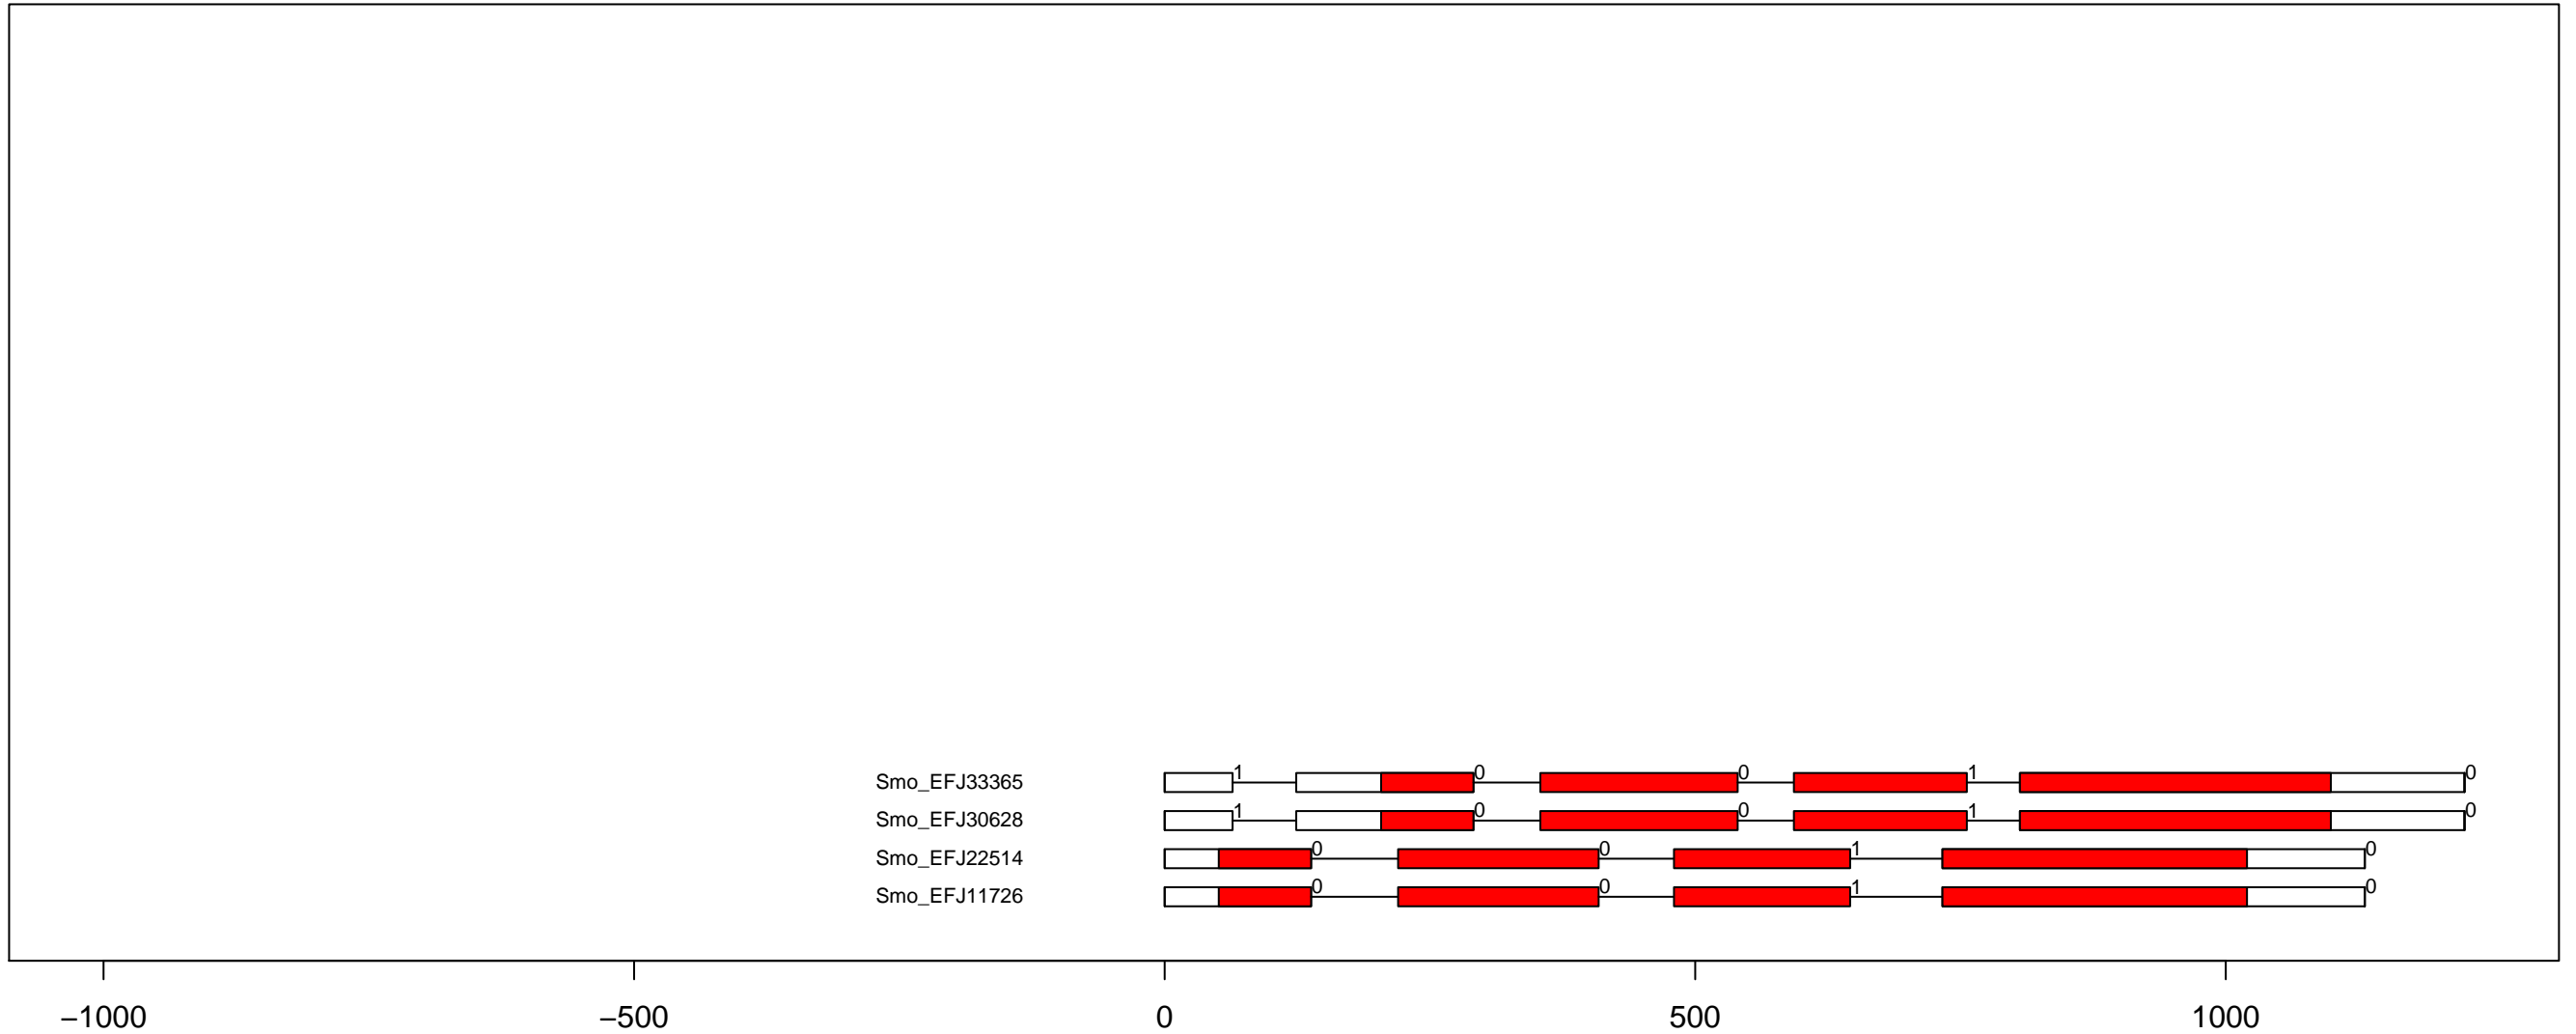

# S.mo class III peroxidase VI subfamily exon-intron and prx domain diagram (all)

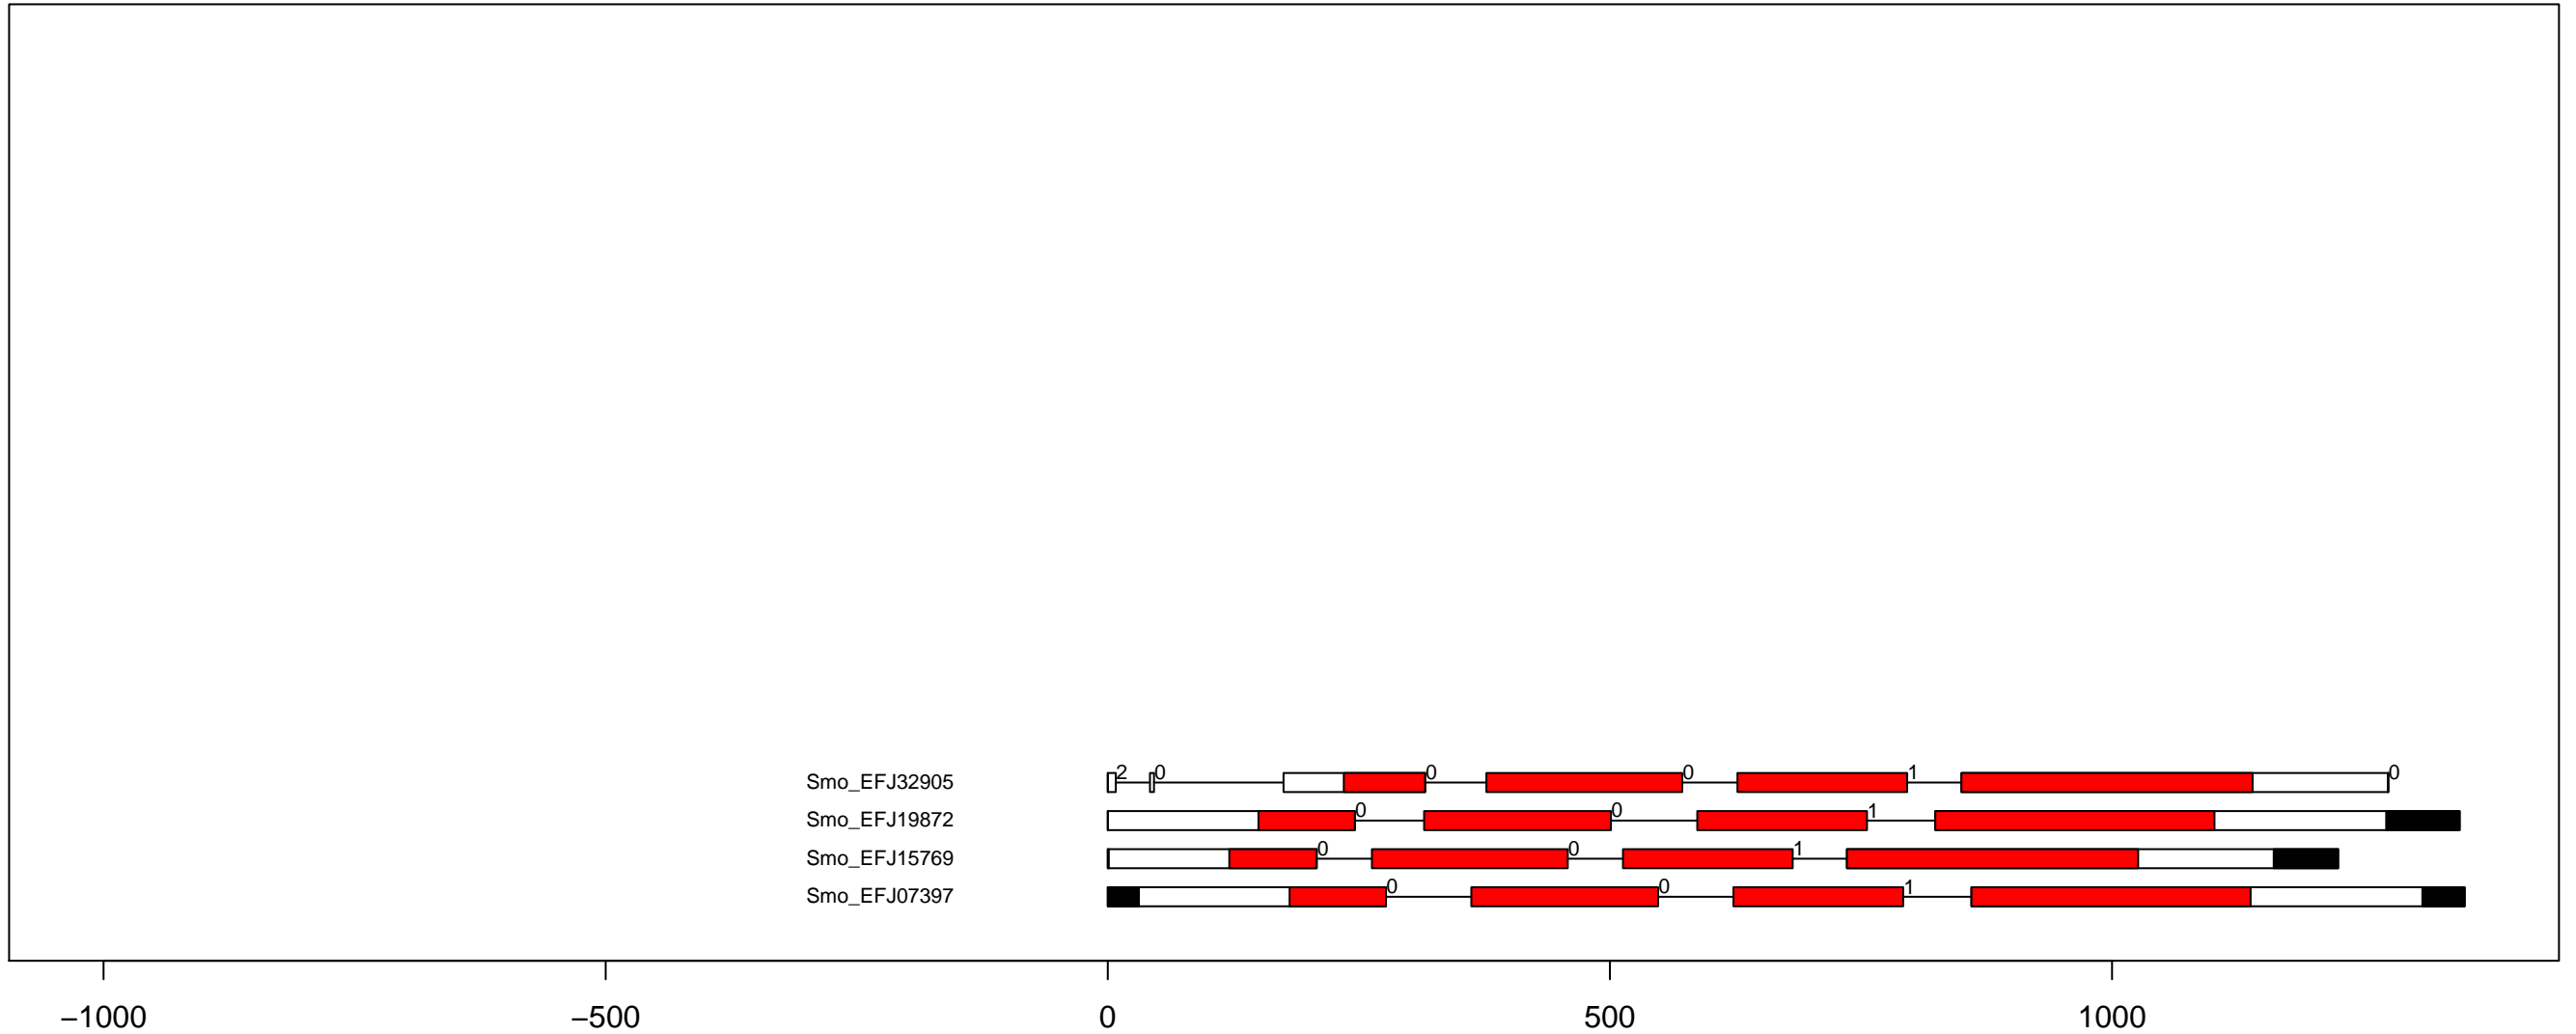





### S.mo class III peroxidase IX subfamily exon-intron and prx domain diagram (part 1)

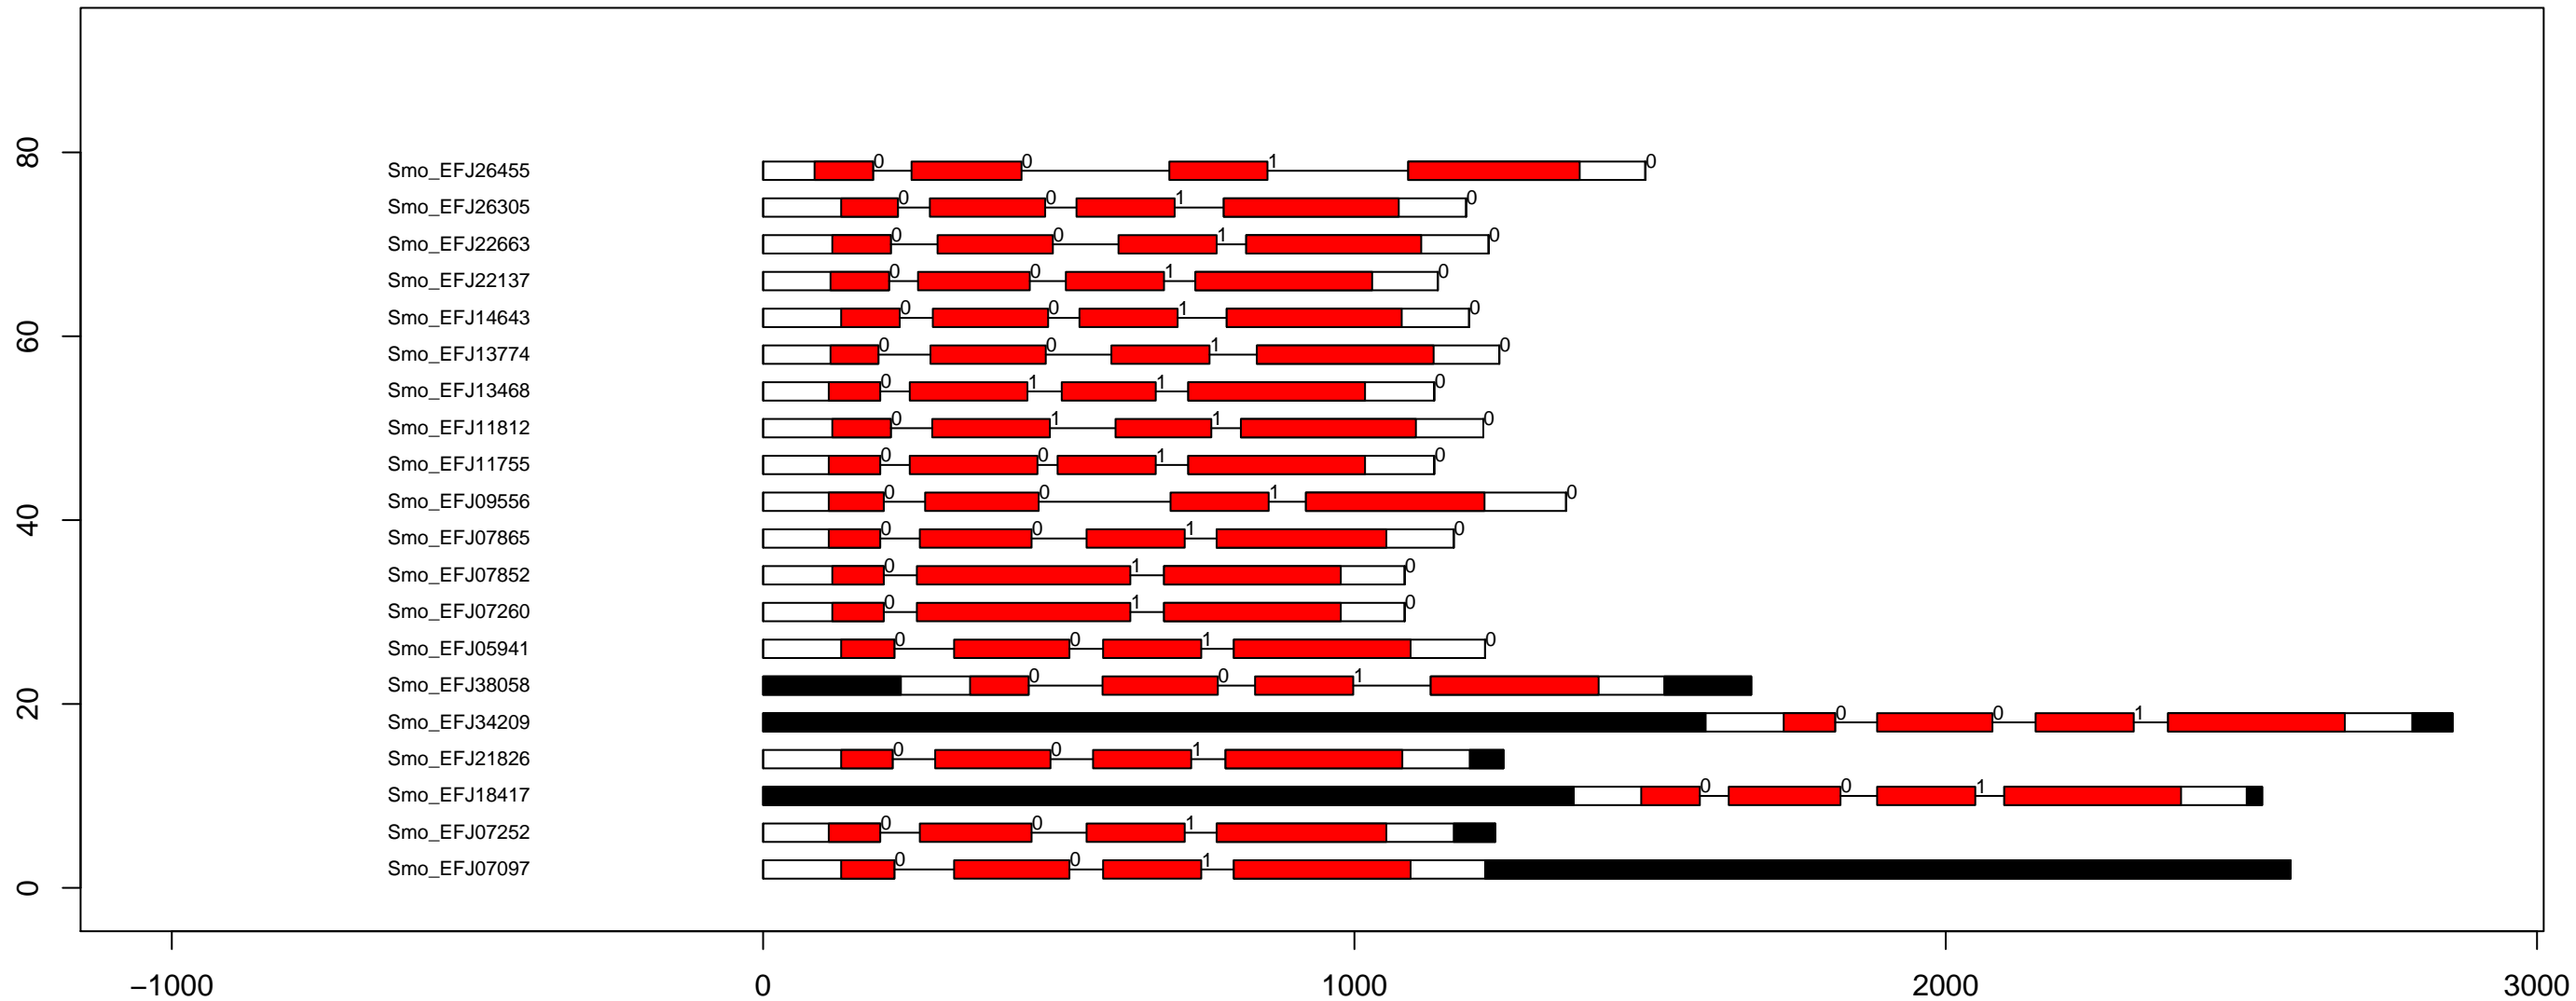

# S.mo class III peroxidase IX subfamily exon-intron and prx domain diagram (part 2)

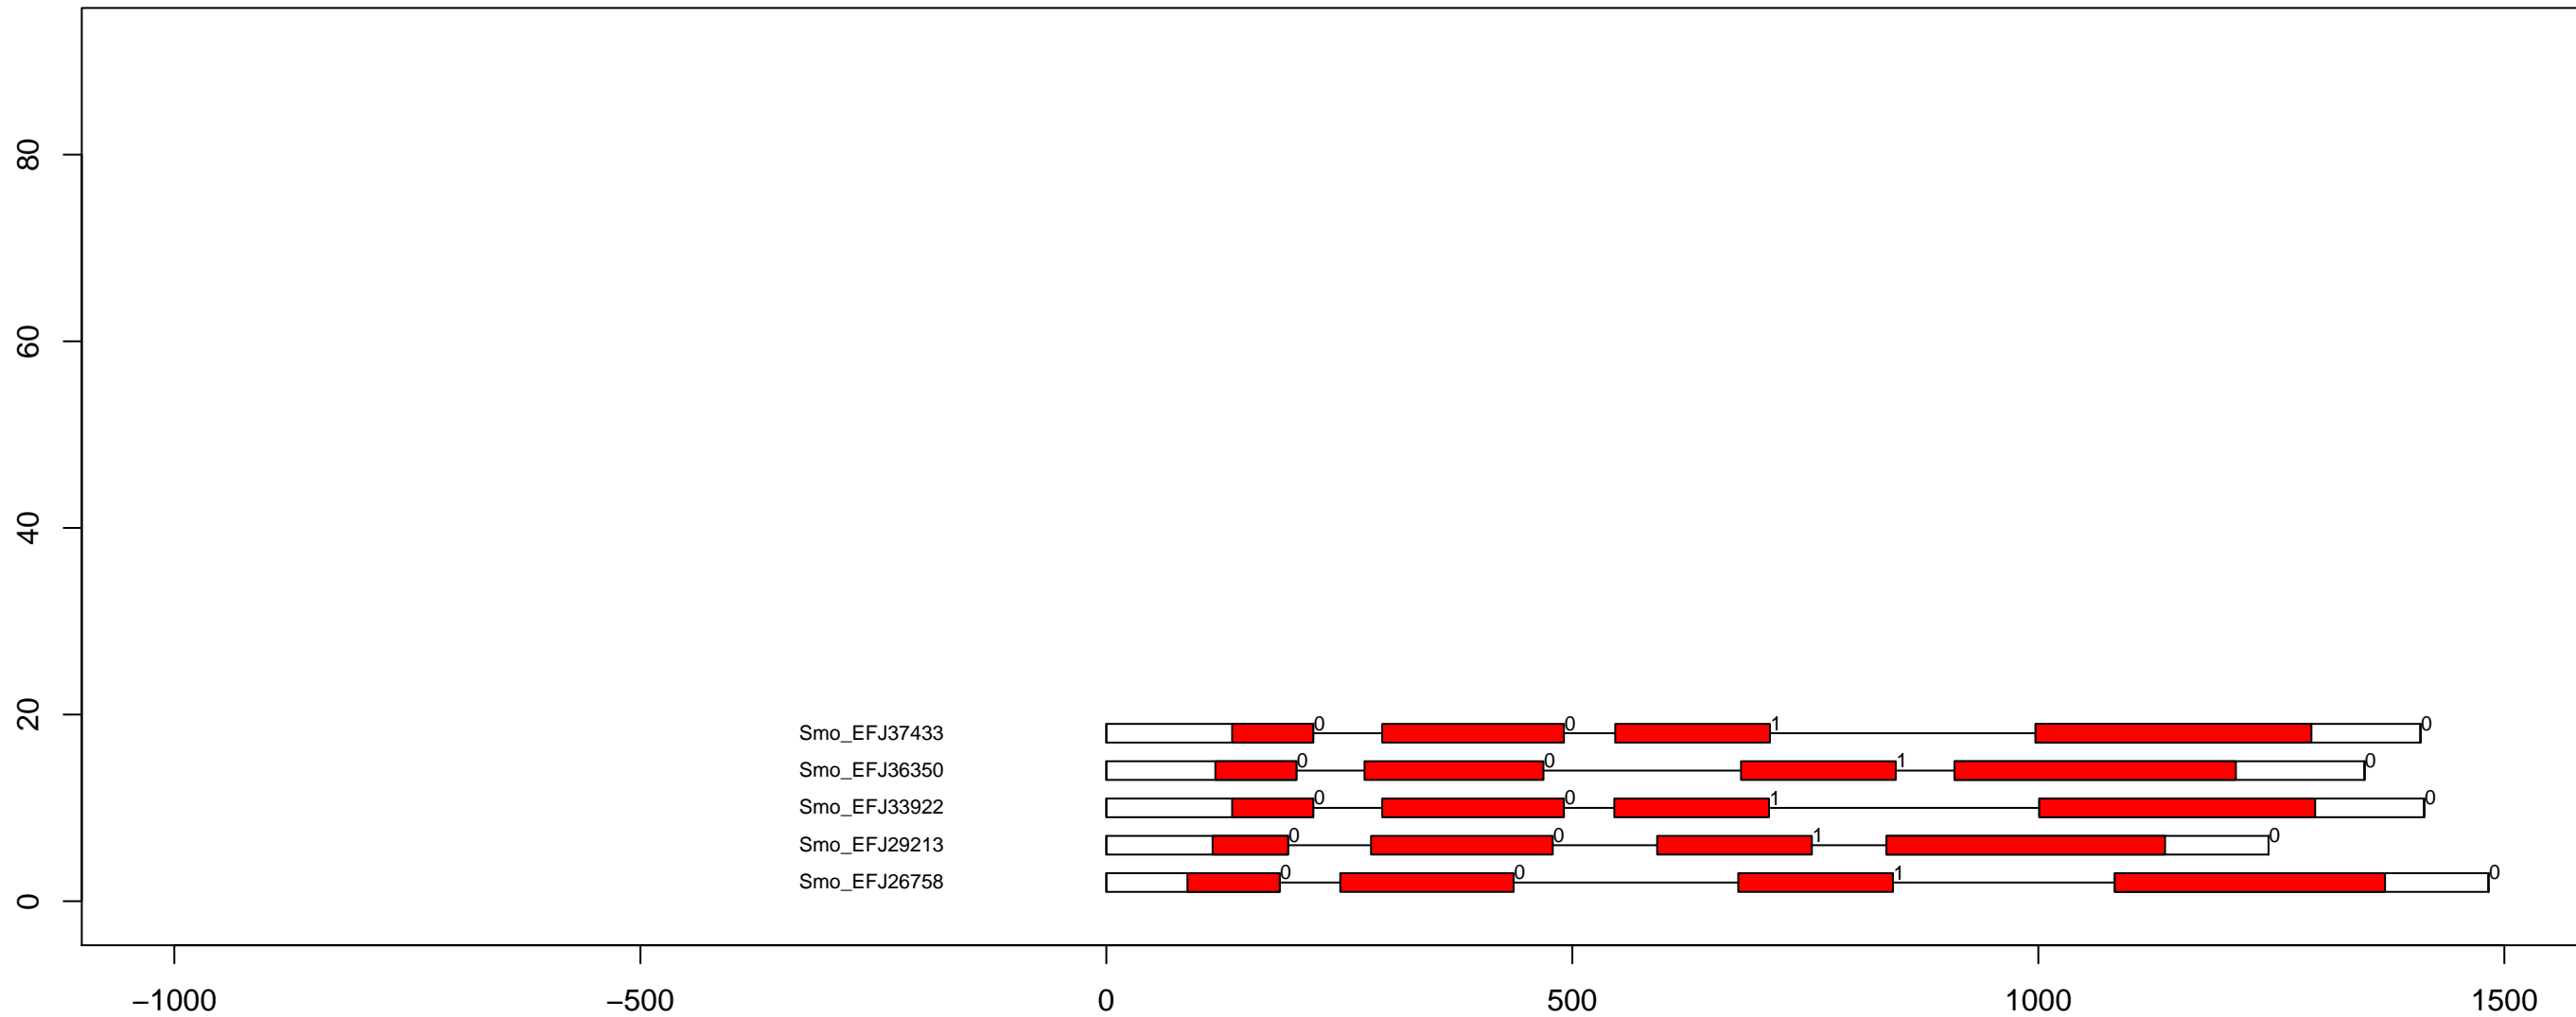

# S.mo class III peroxidase X subfamily exon-intron and prx domain diagram (all)

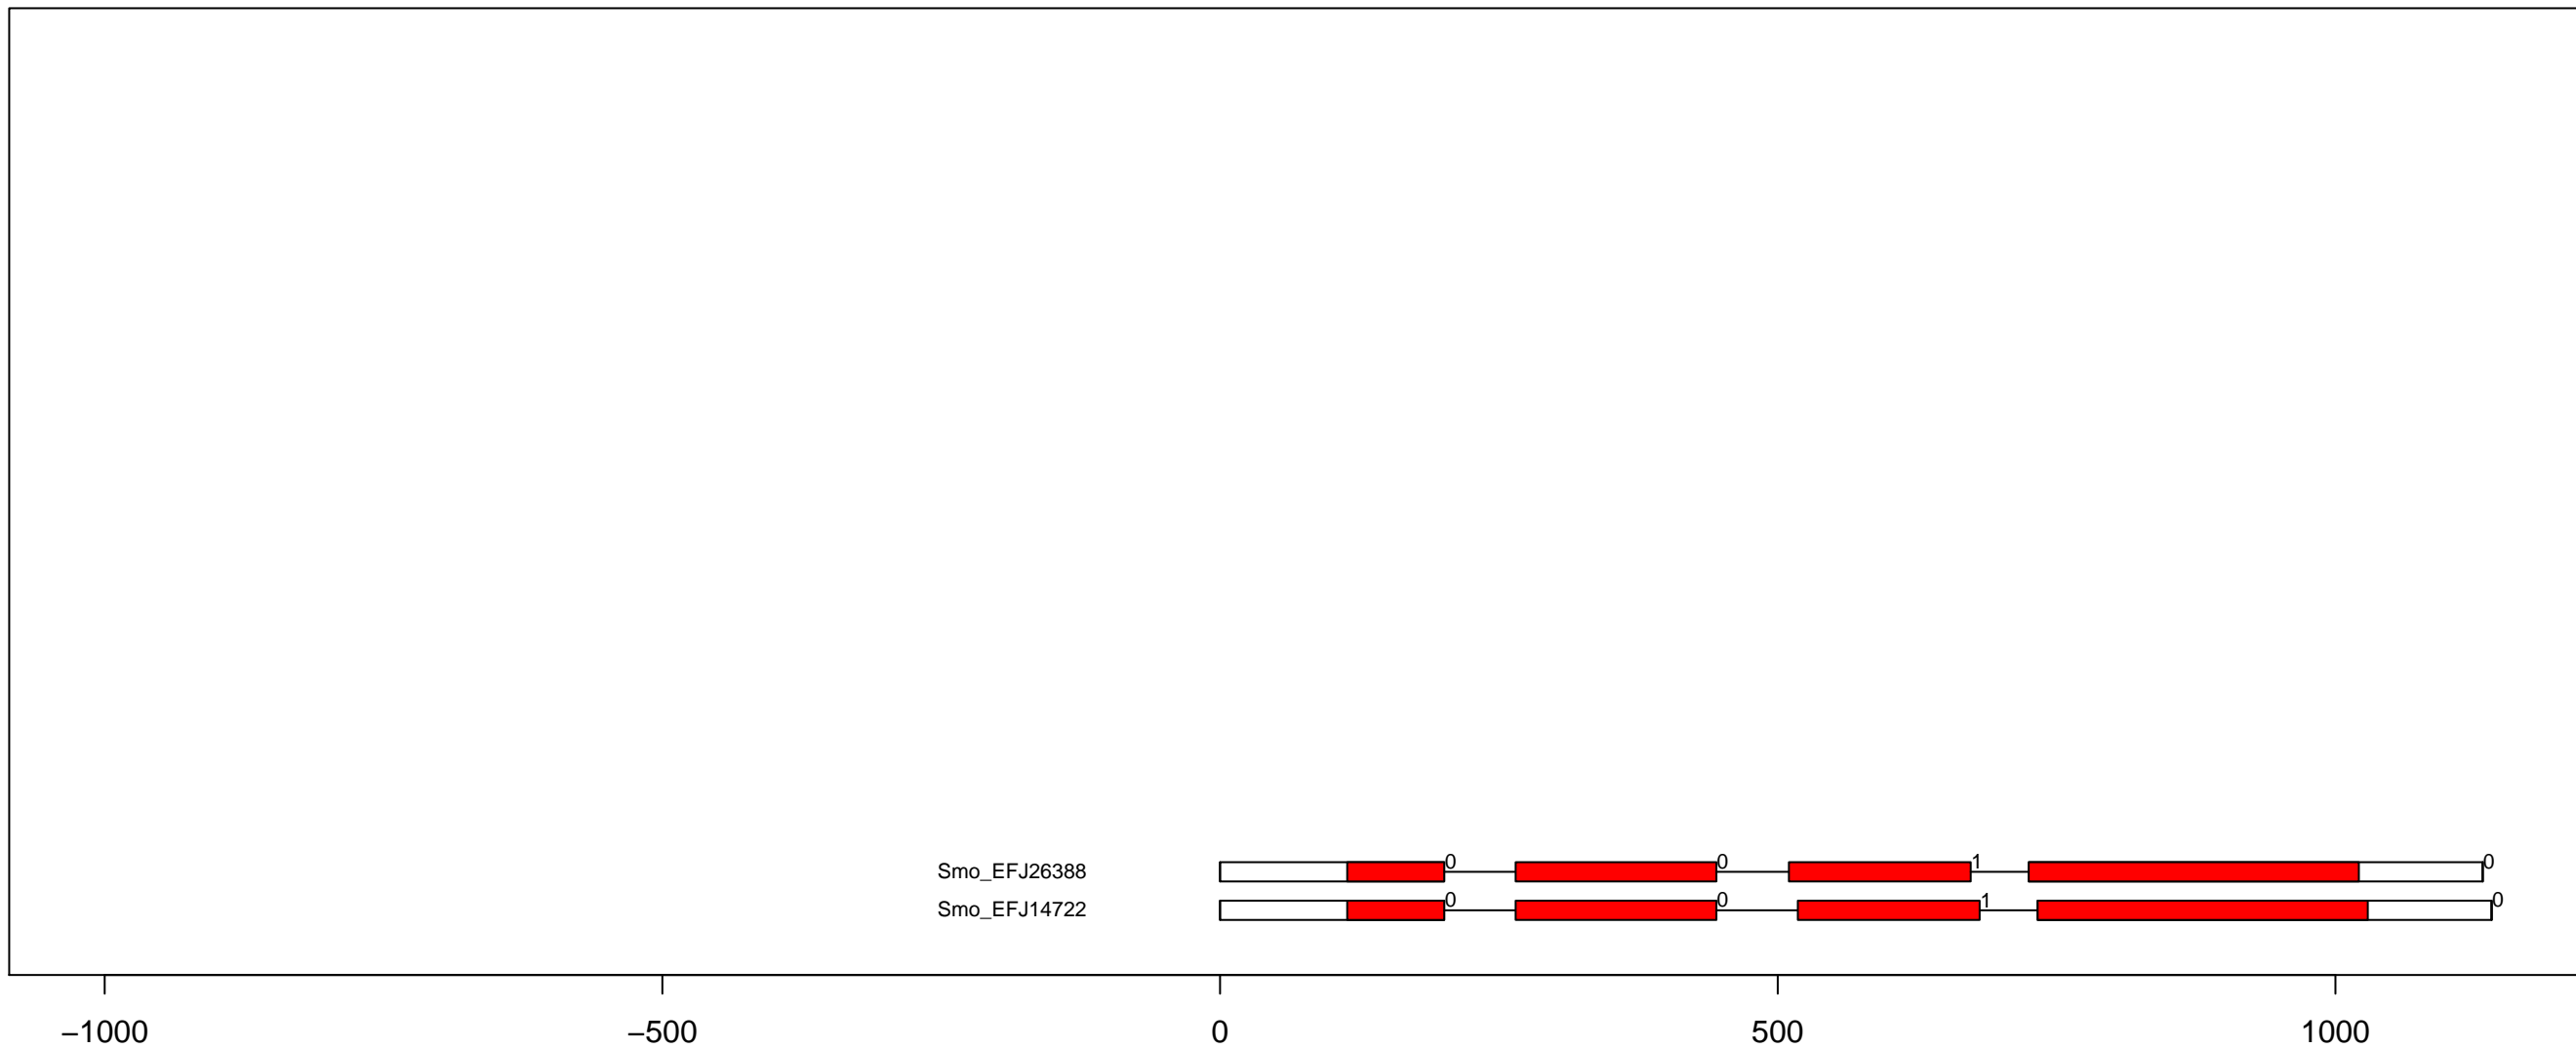

# S.mo class III peroxidase unclar\_classification subfamily exon-intron and prx domain diagram (part 1)

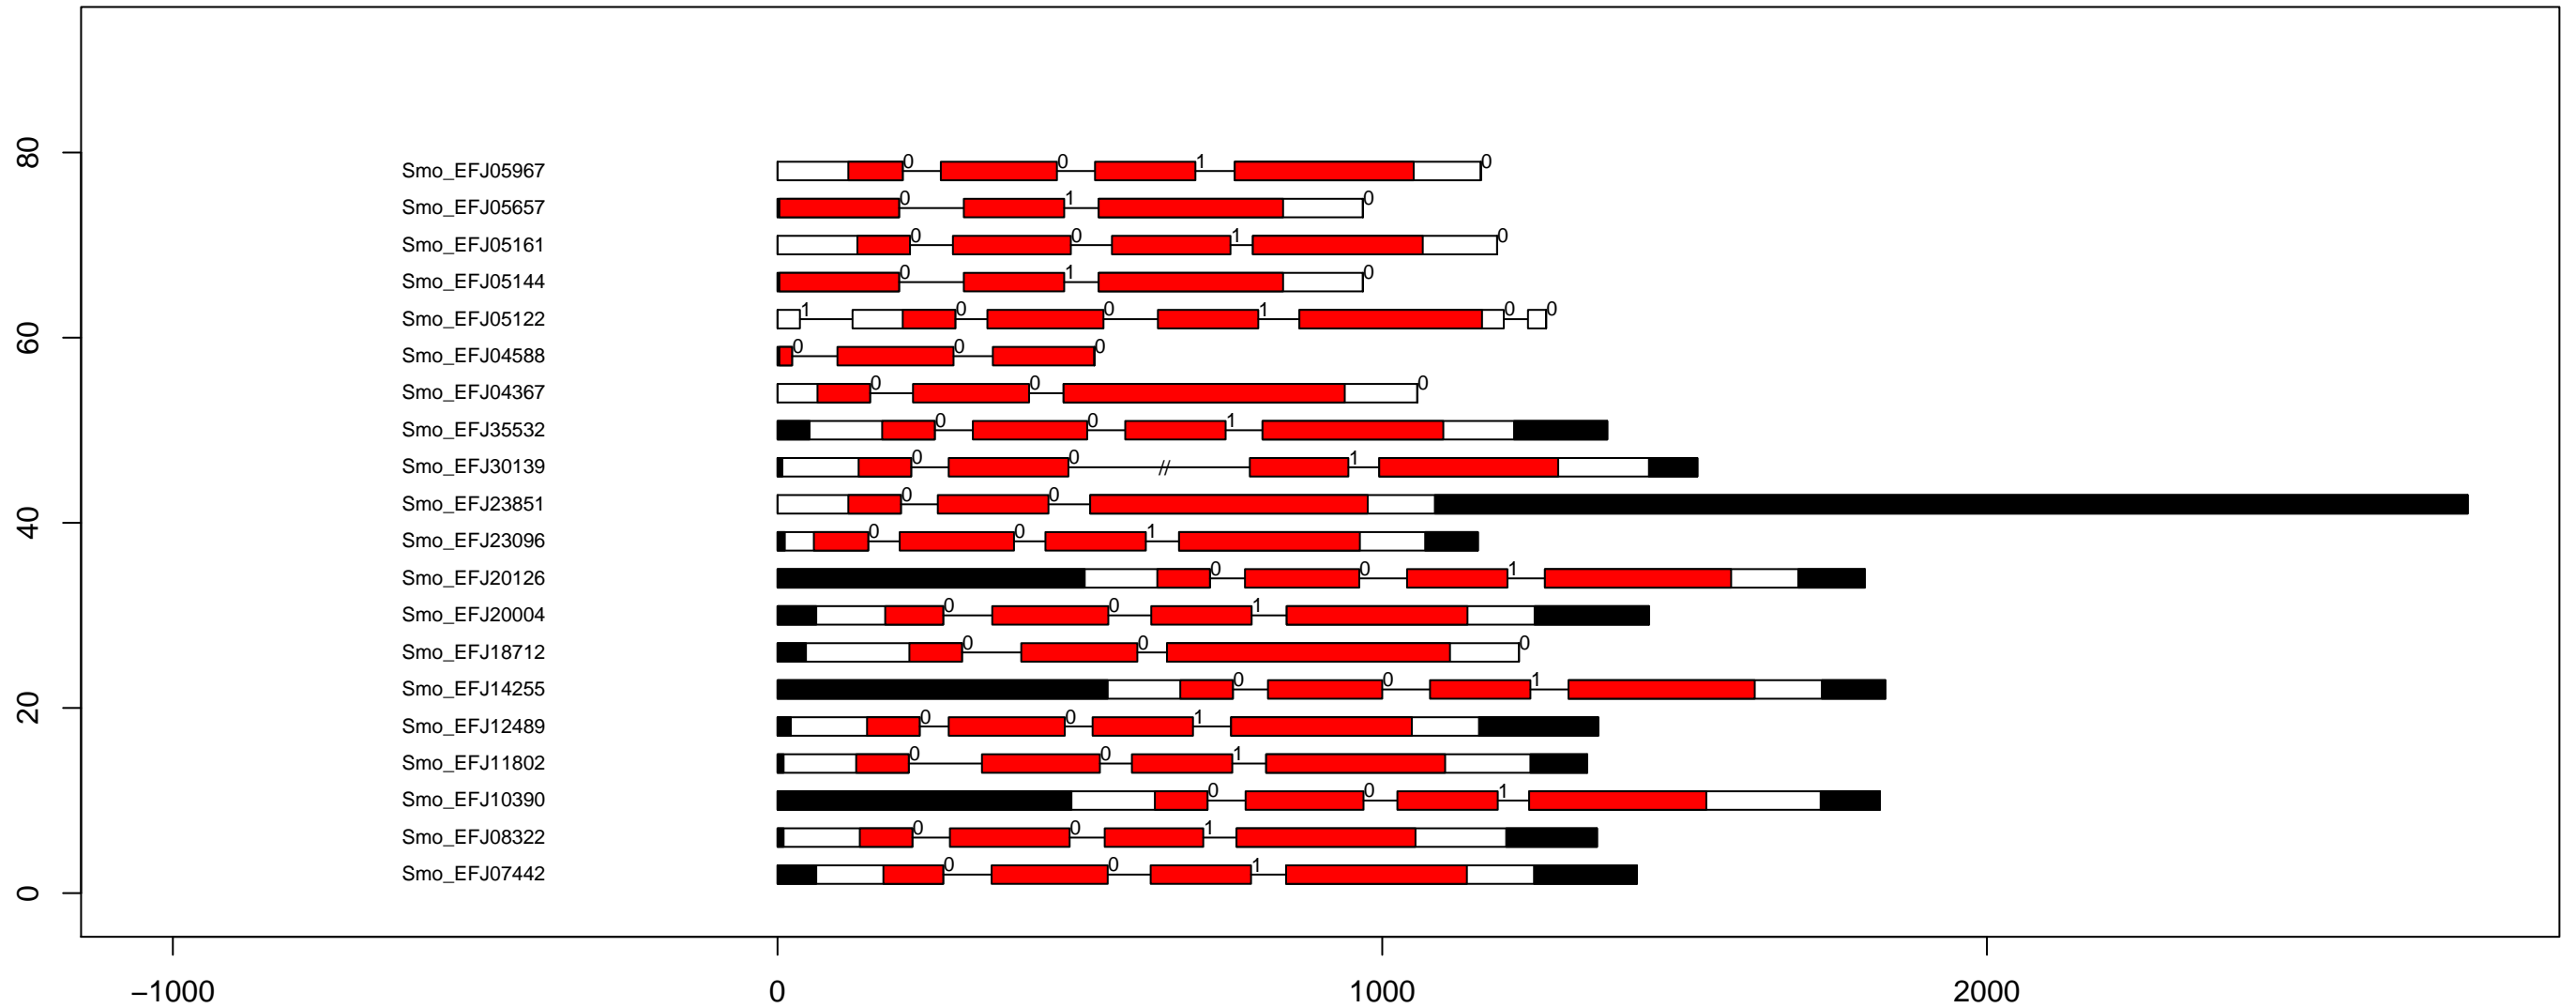



### S.mo class III peroxidase unclar\_classification subfamily exon-intron and prx domain diagram (part 3)

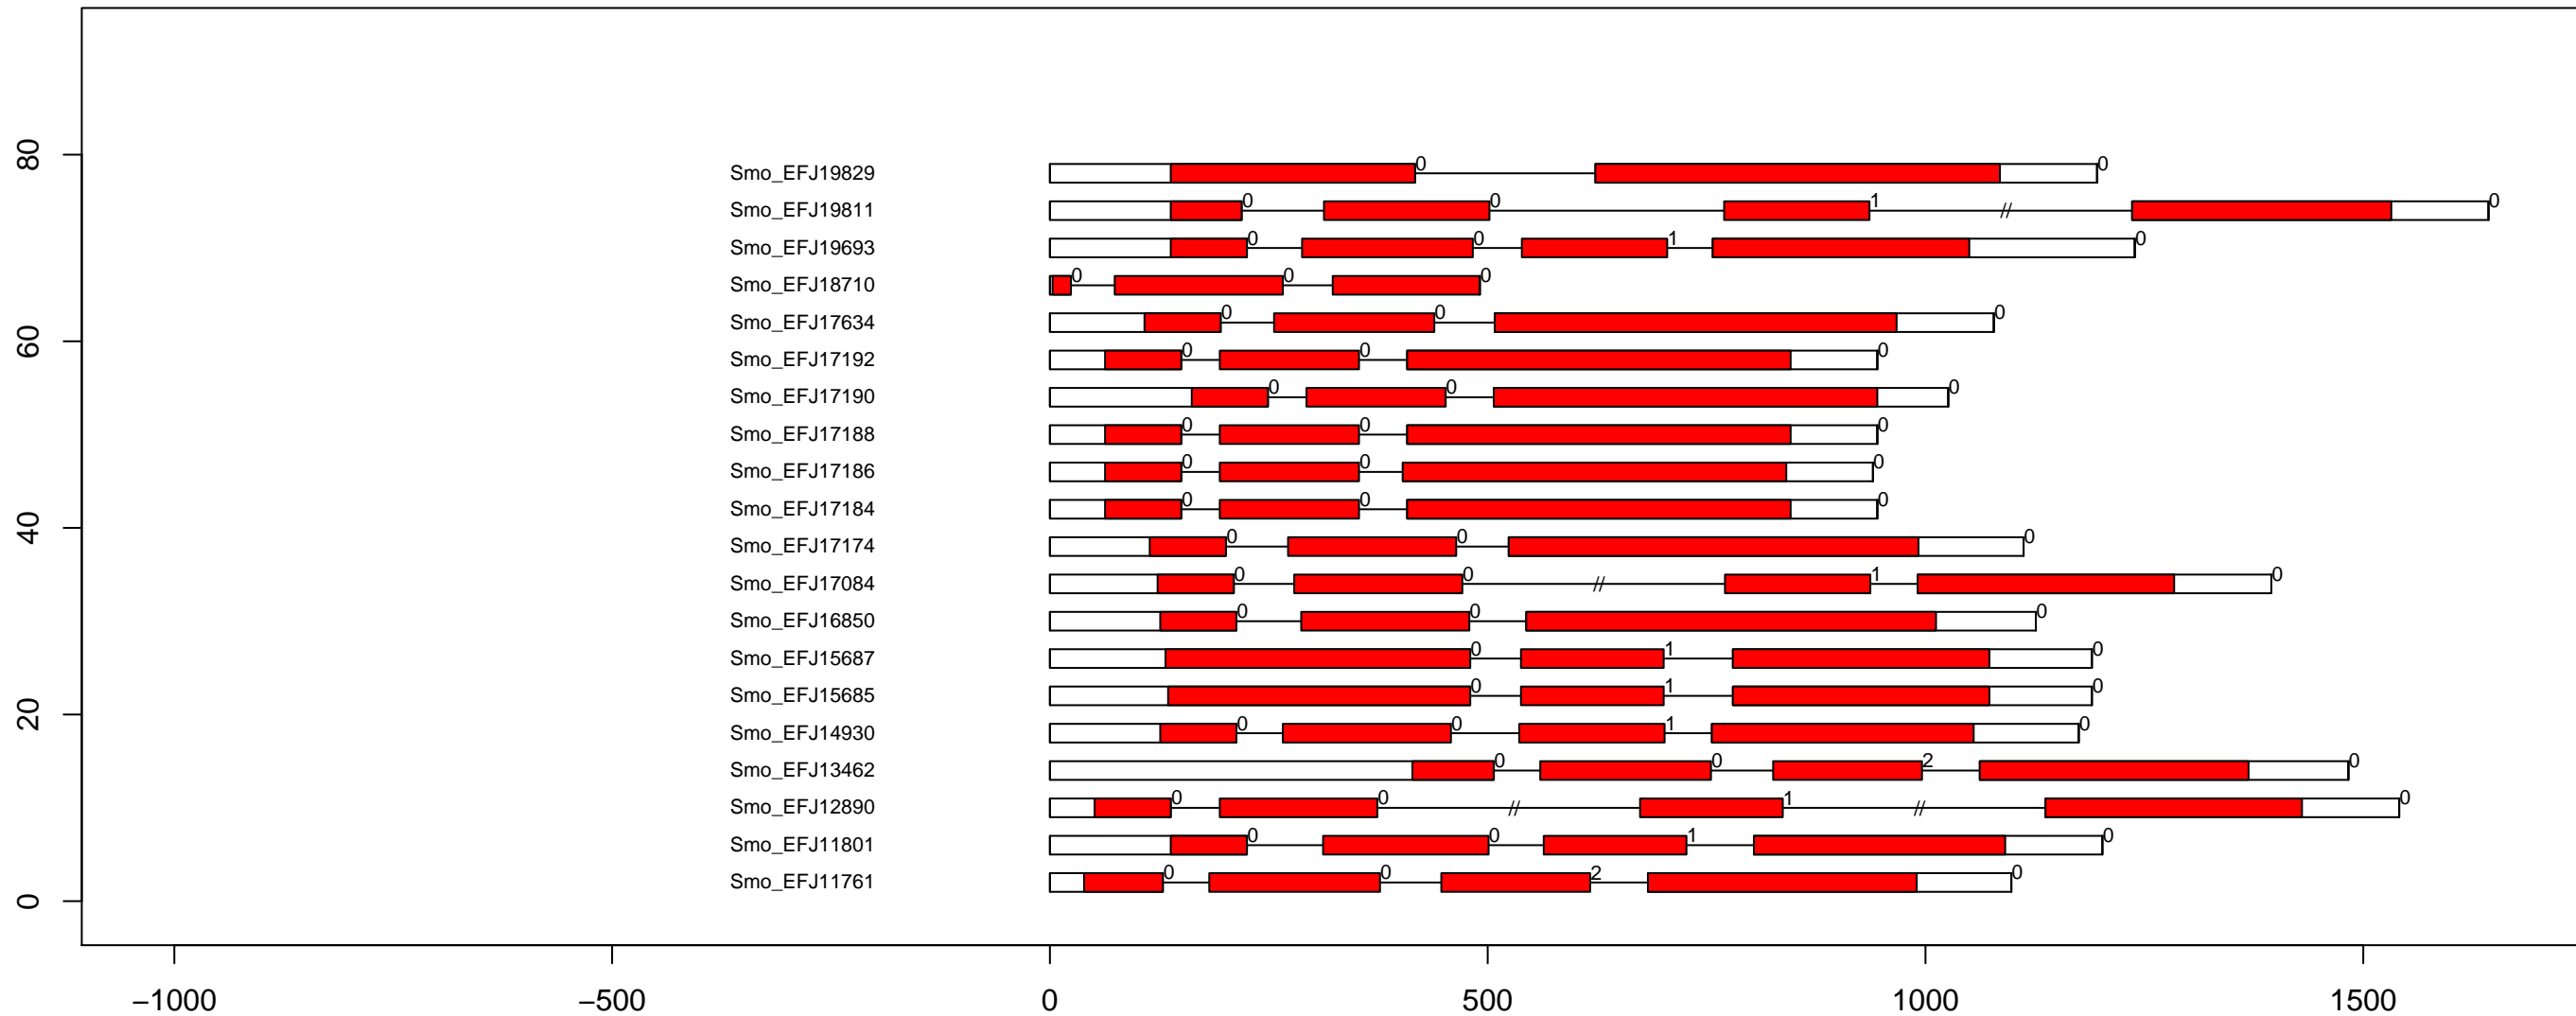

### S.mo class III peroxidase unclar\_classification subfamily exon-intron and prx domain diagram (part 4)

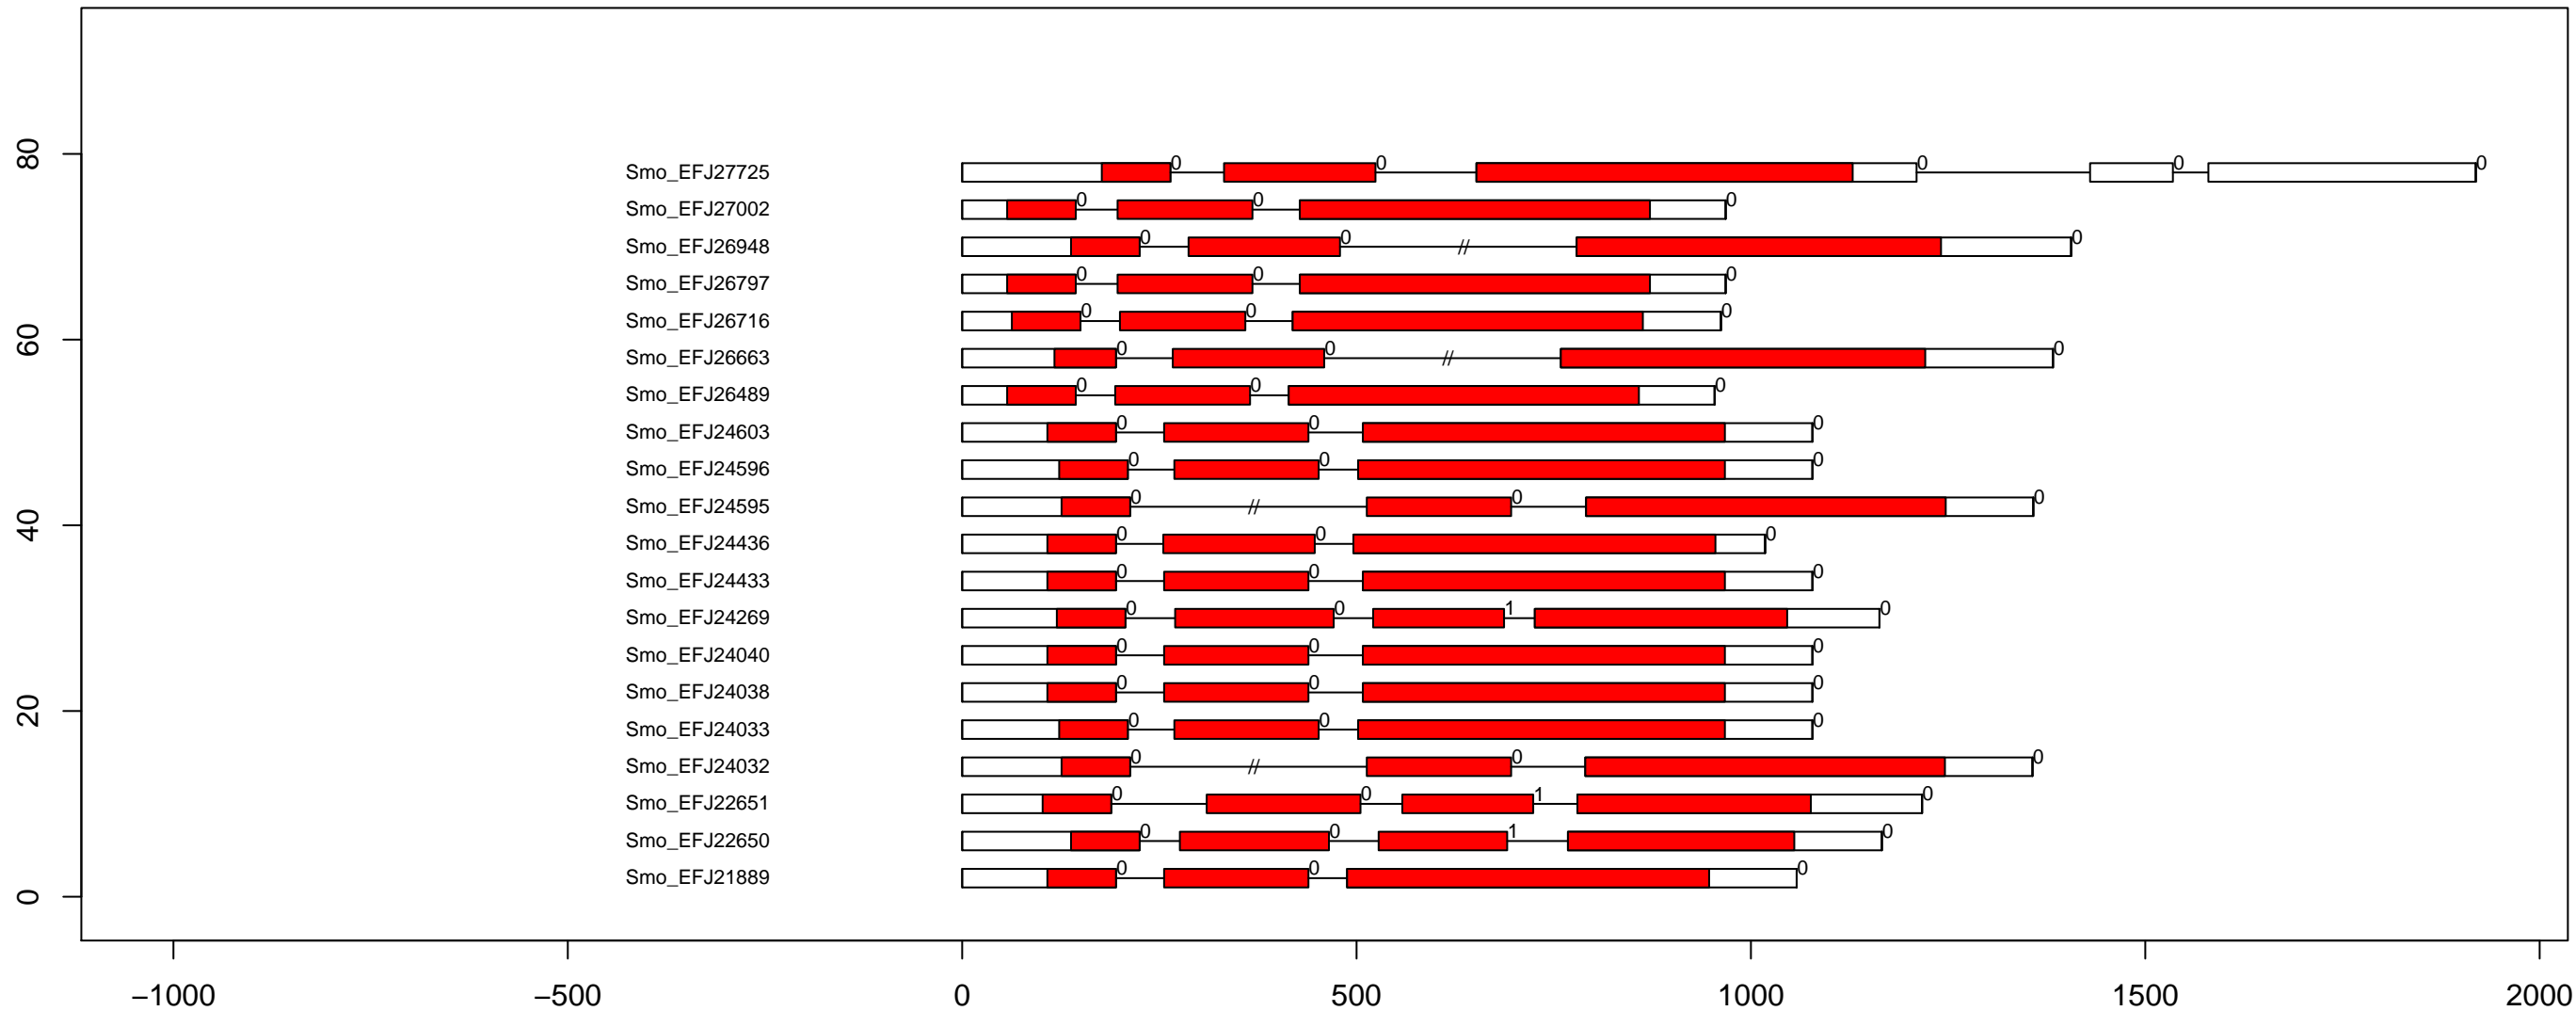





### P.pa class III peroxidase I subfamily exon-intron and prx domain diagram (part 1)

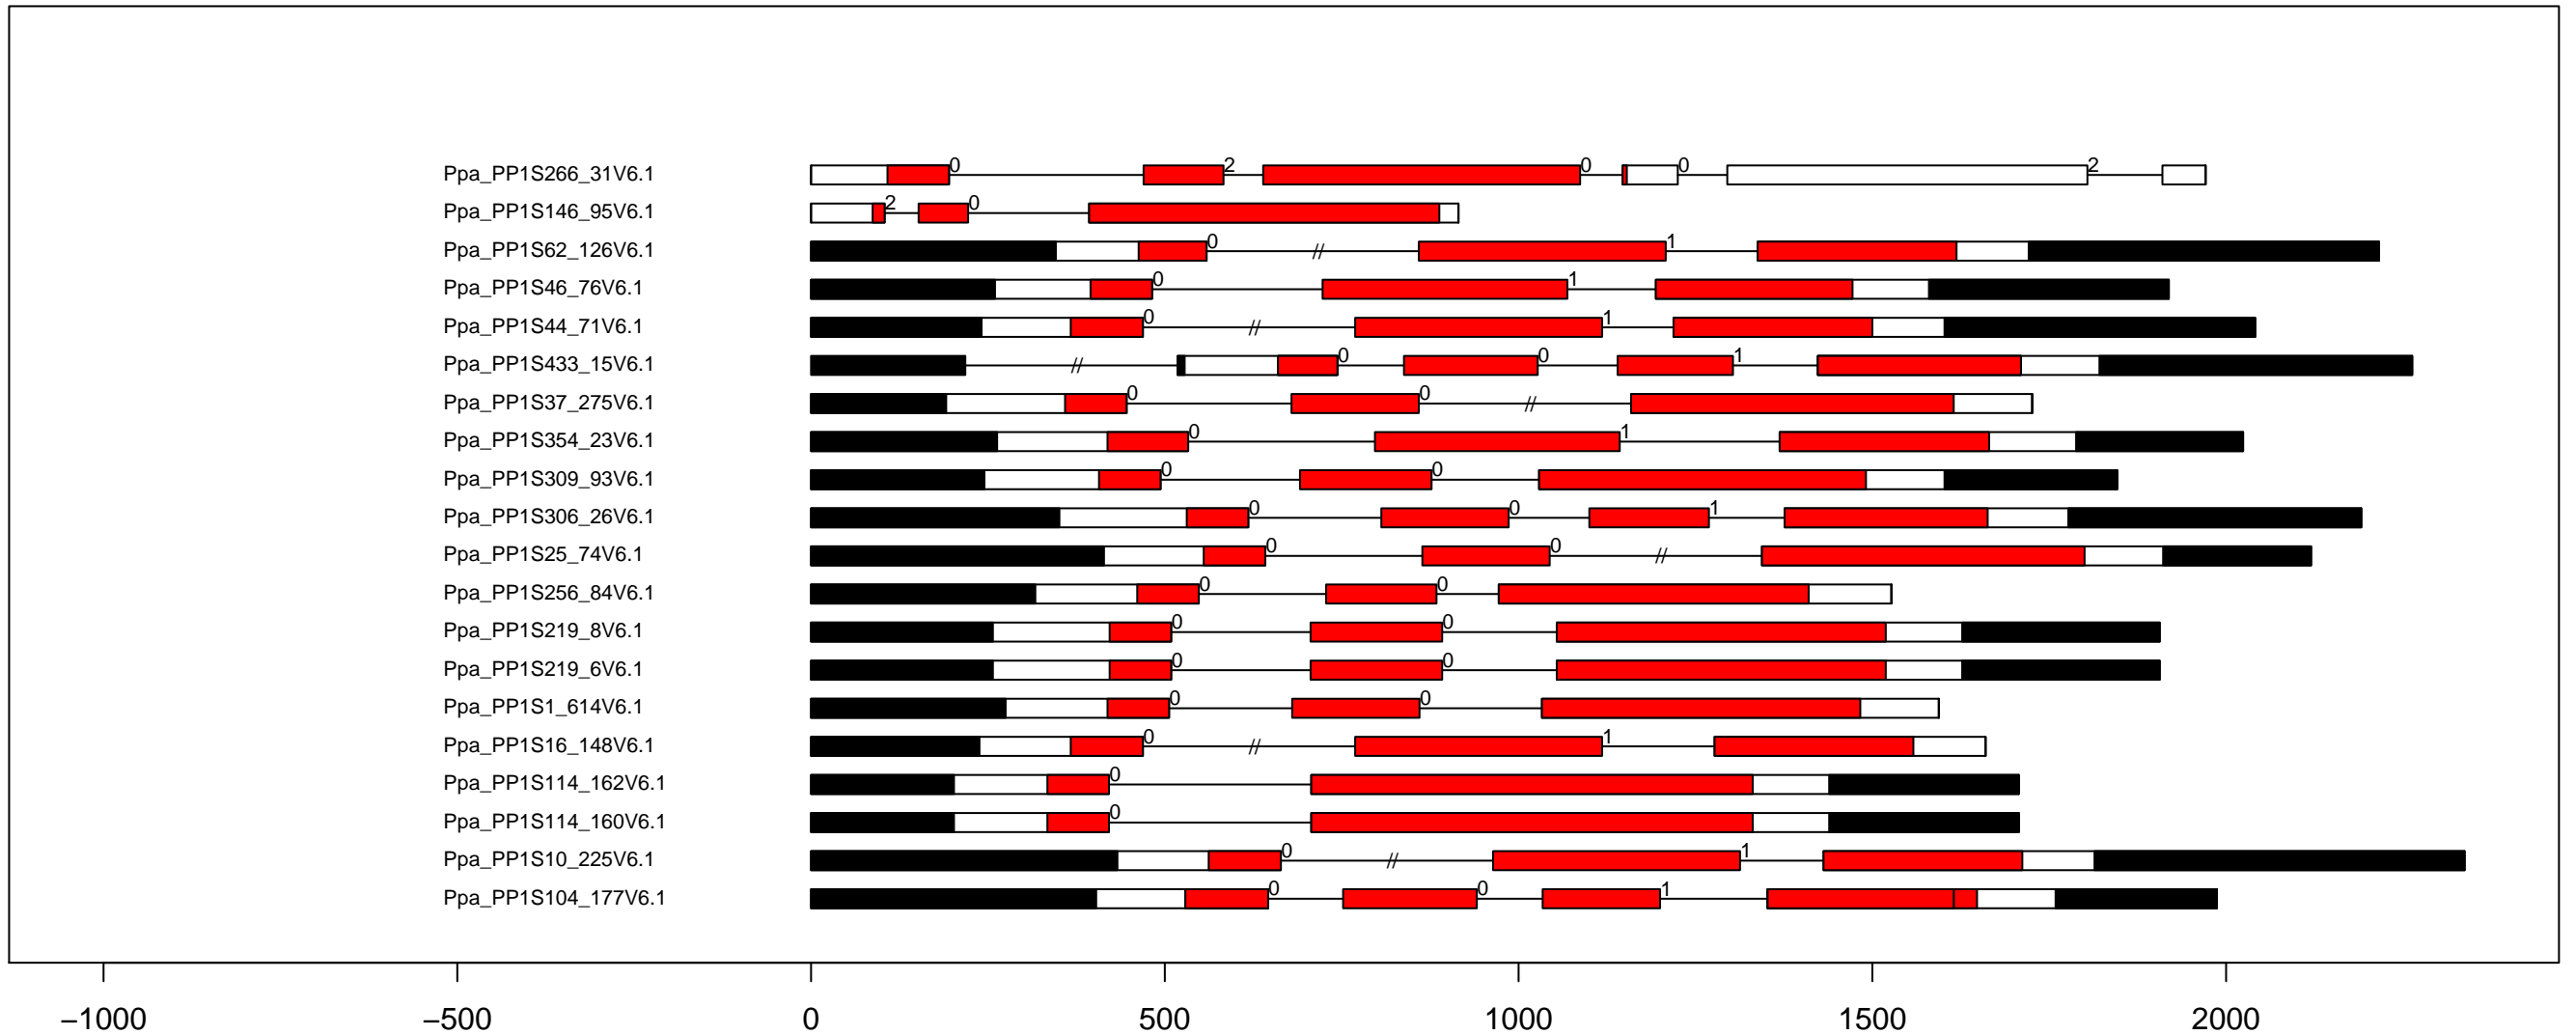

# P.pa class III peroxidase I subfamily exon-intron and prx domain diagram (part 2)

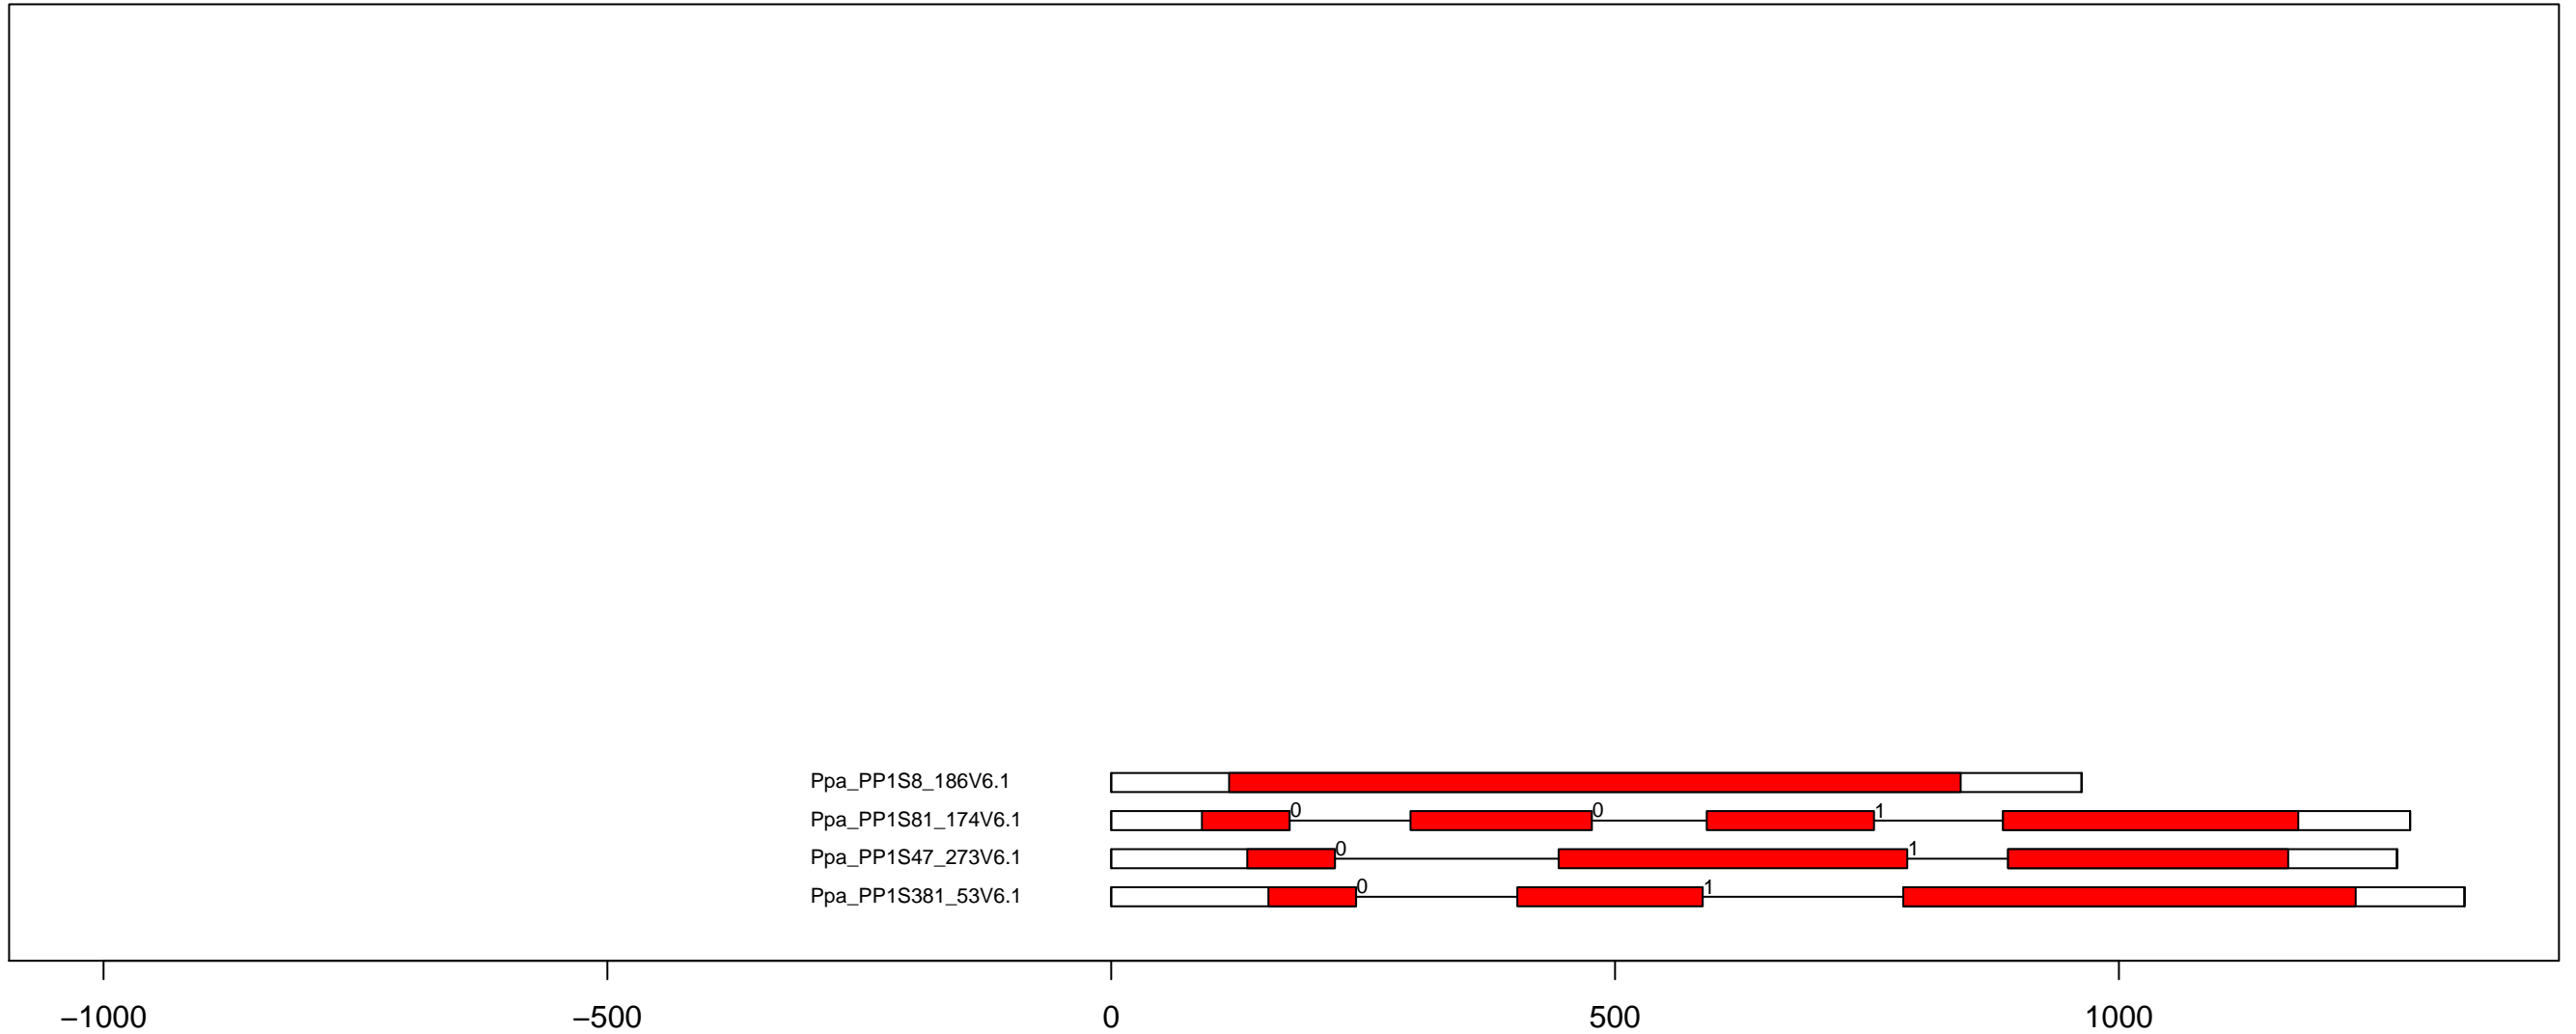

# P.pa class III peroxidase VII subfamily exon-intron and prx domain diagram (all)

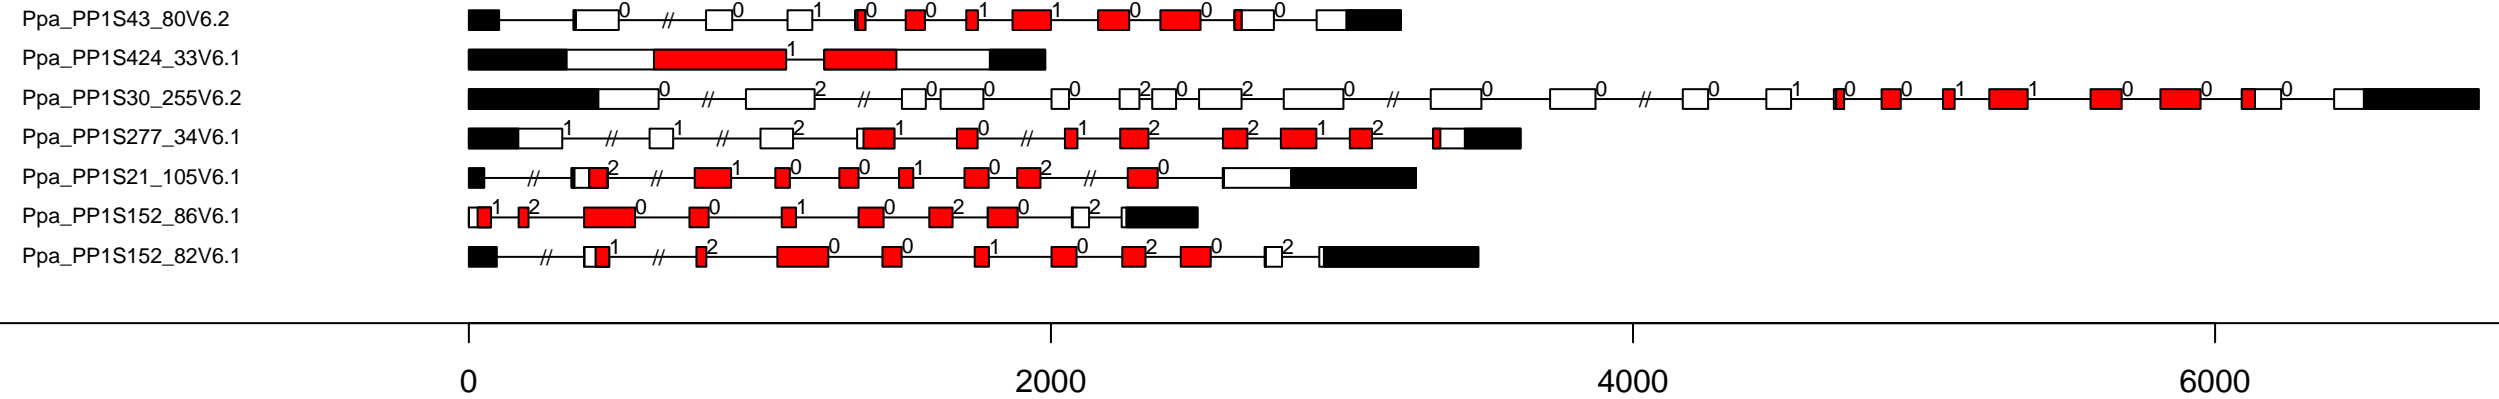

# P.pa class III peroxidase unclar\_classification subfamily exon-intron and prx domain diagram (part 1)

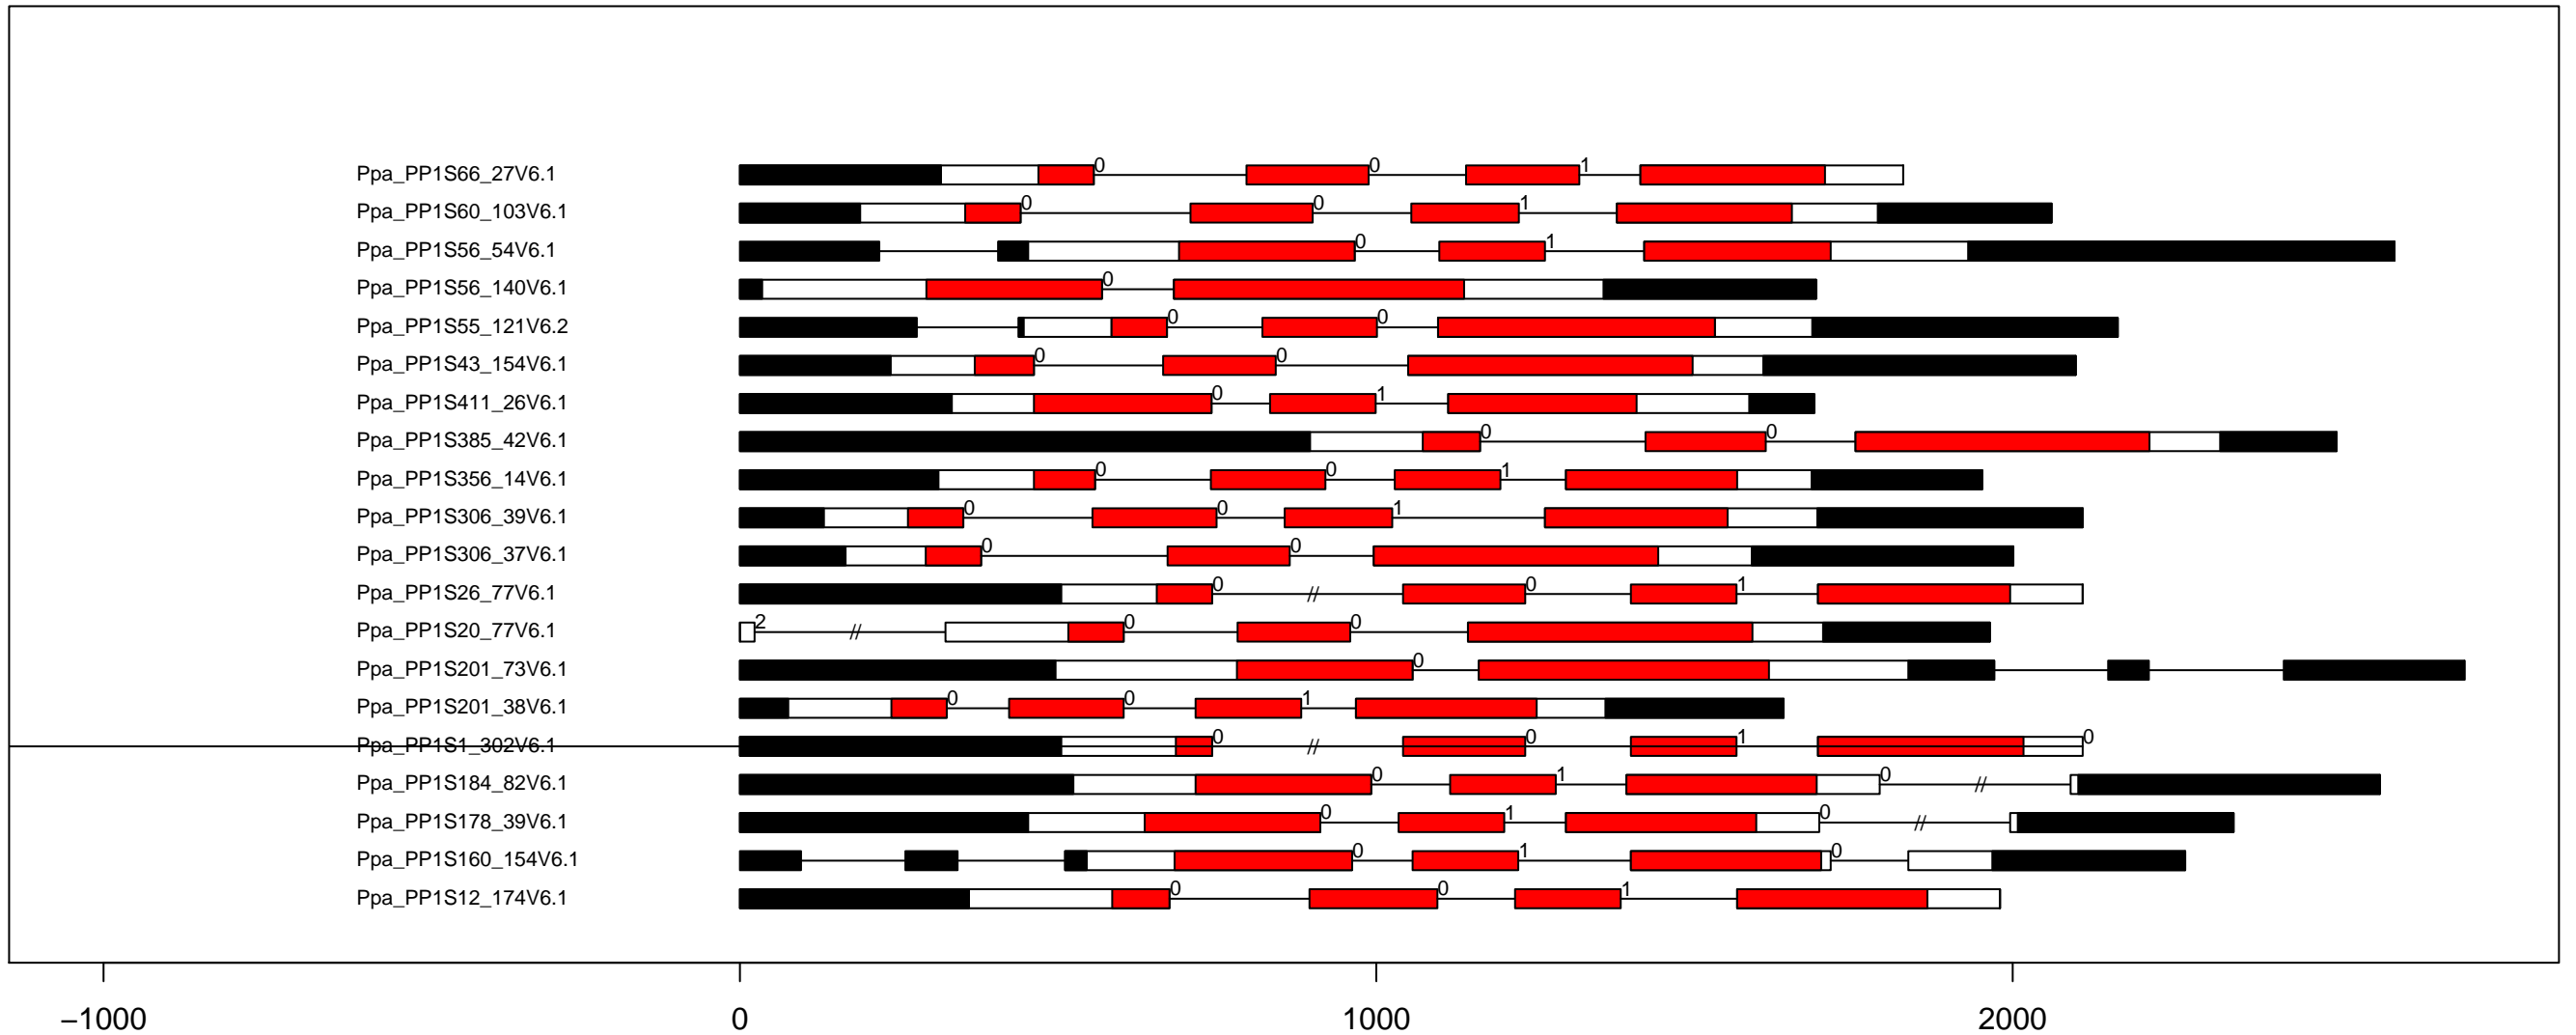

# P.pa class III peroxidase unclear\_classification subfamily exon-intron and prx domain diagram (part 2)

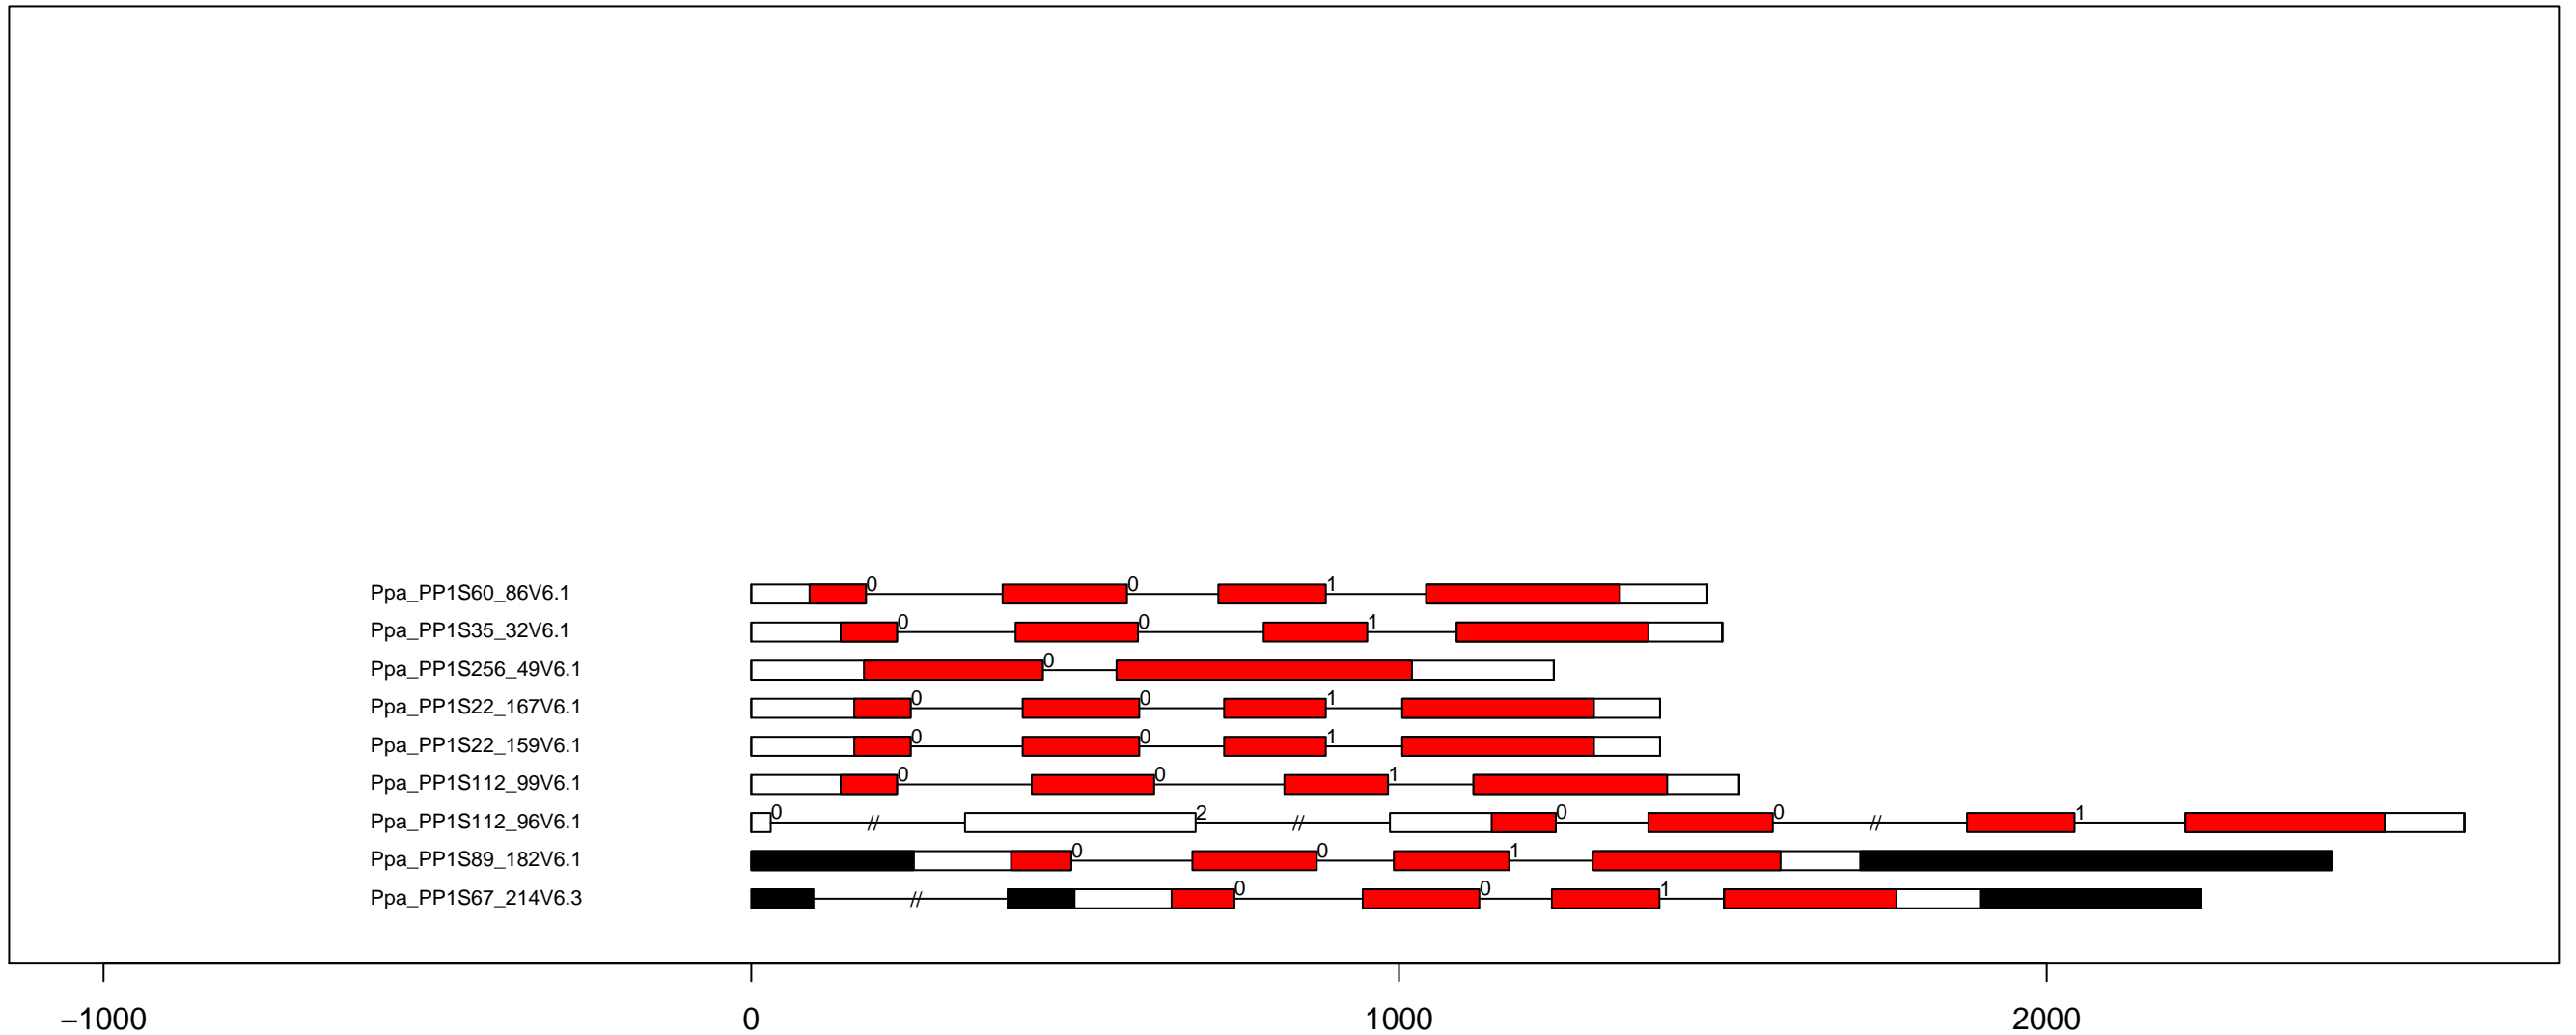

# C.re class III peroxidase VII subfamily exon-intron and prx domain diagram (all)

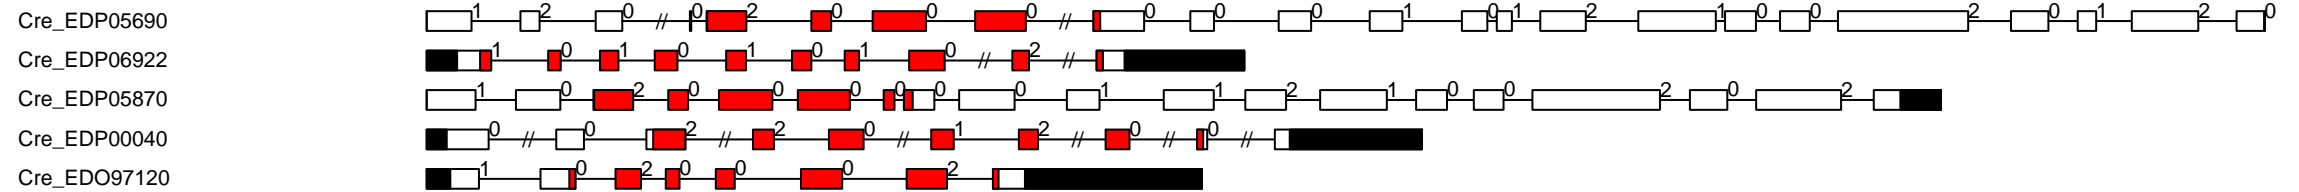

# C.re class III peroxidase unclar\_classification subfamily exon-intron and prx domain diagram (all)

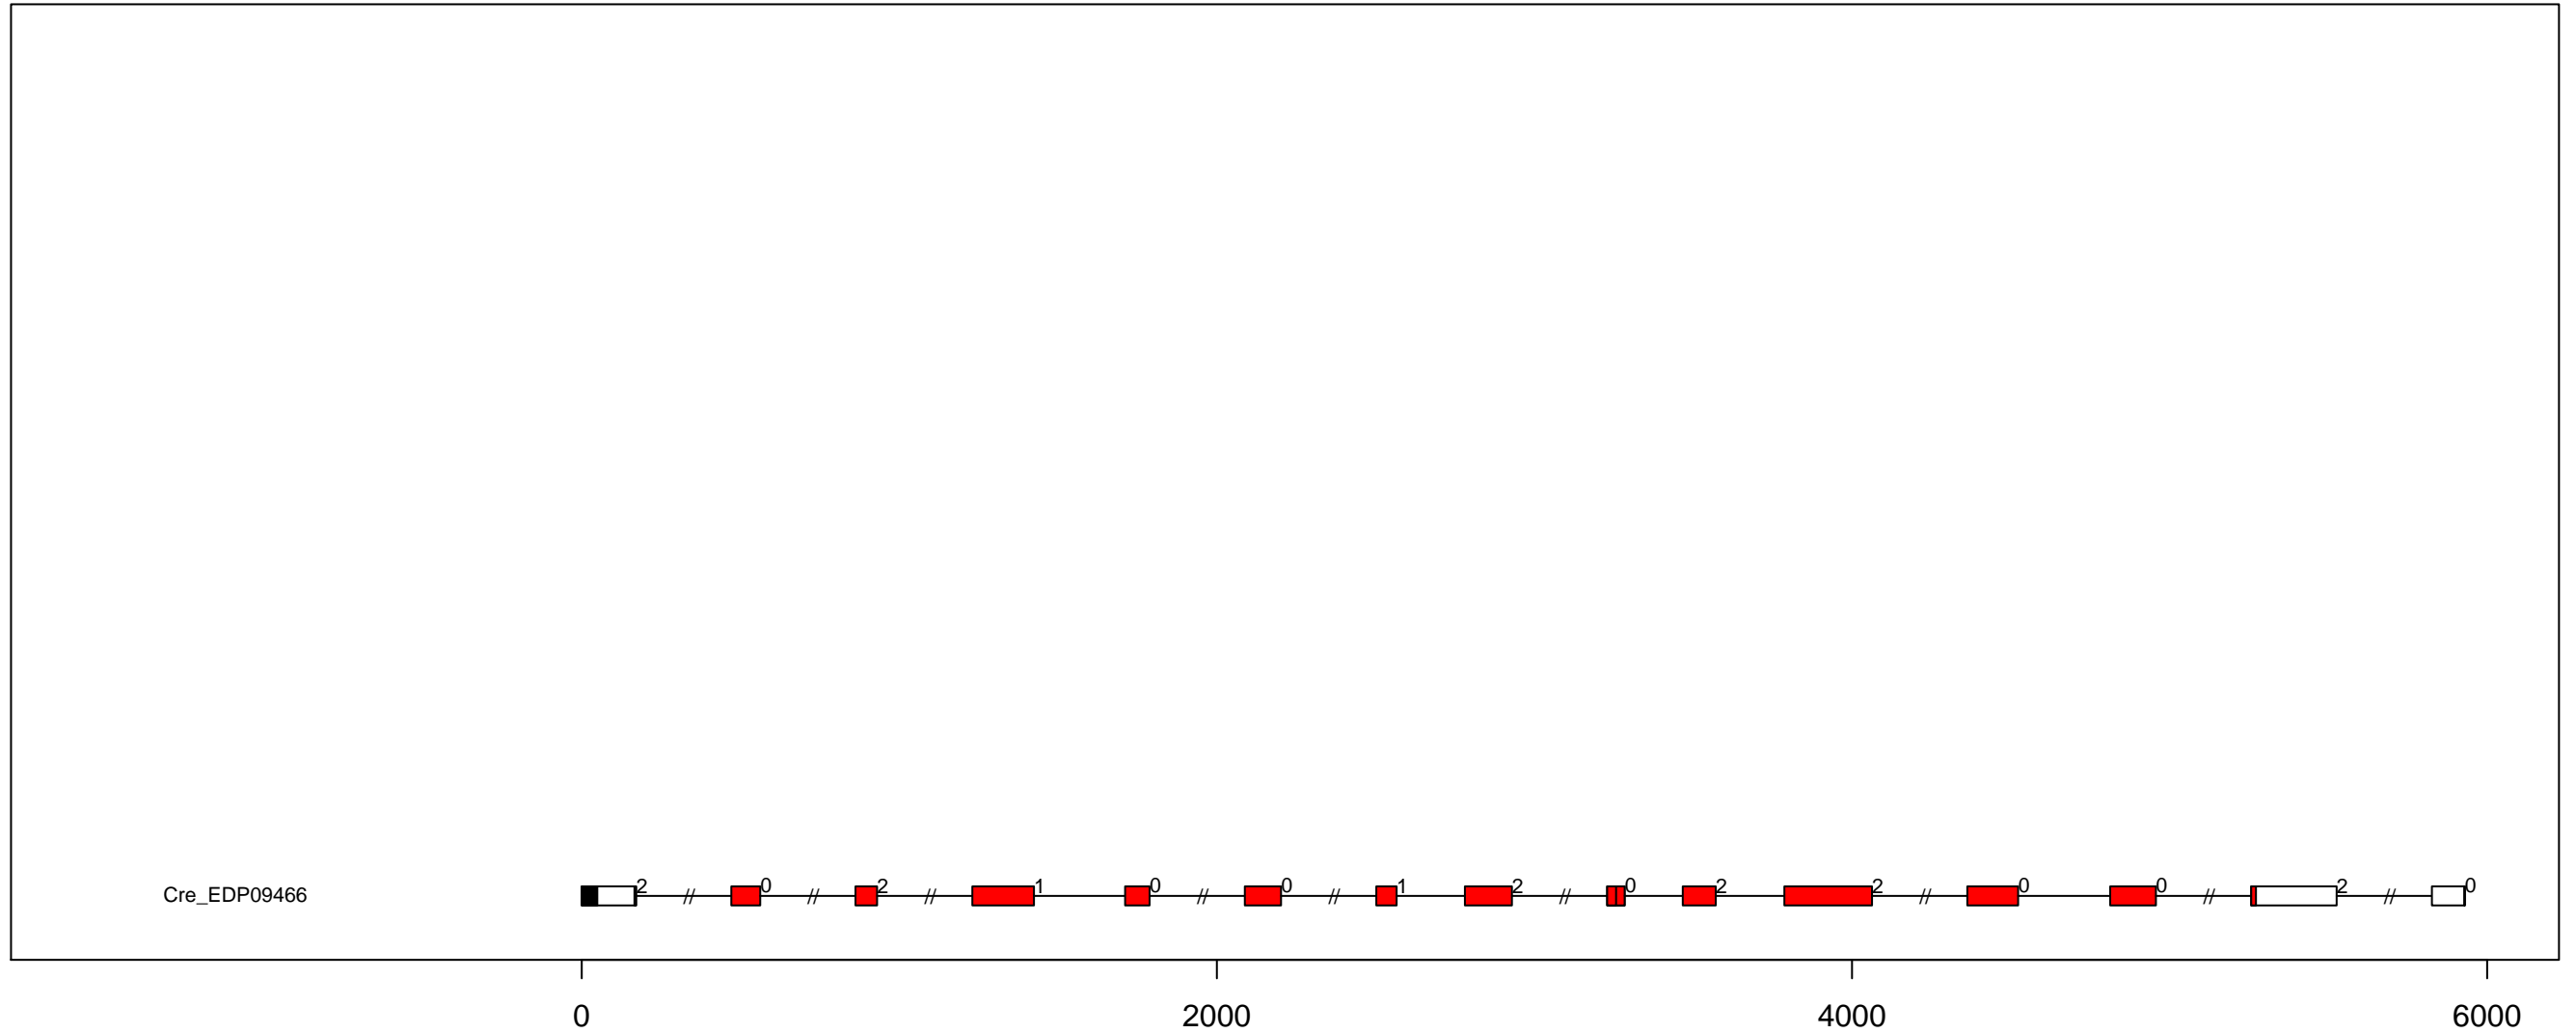

Supplement: 12864_2019_6006_MOESM2_ESM.pdf [file 12864_2019_6006_MOESM2_ESM.pdf]
