# Supplementary material for: Genome-wide and evolutionary analysis of the class III peroxidase gene family in wheat and Aegilops tauschii reveals that some members are involved in stress responses
Source: PubMed Central journal article supplement (PMC6704529; doi:10.1186/s12864-019-6006-5), 2019-08-22

# GSE12508 (tissue)

## RLE values by array

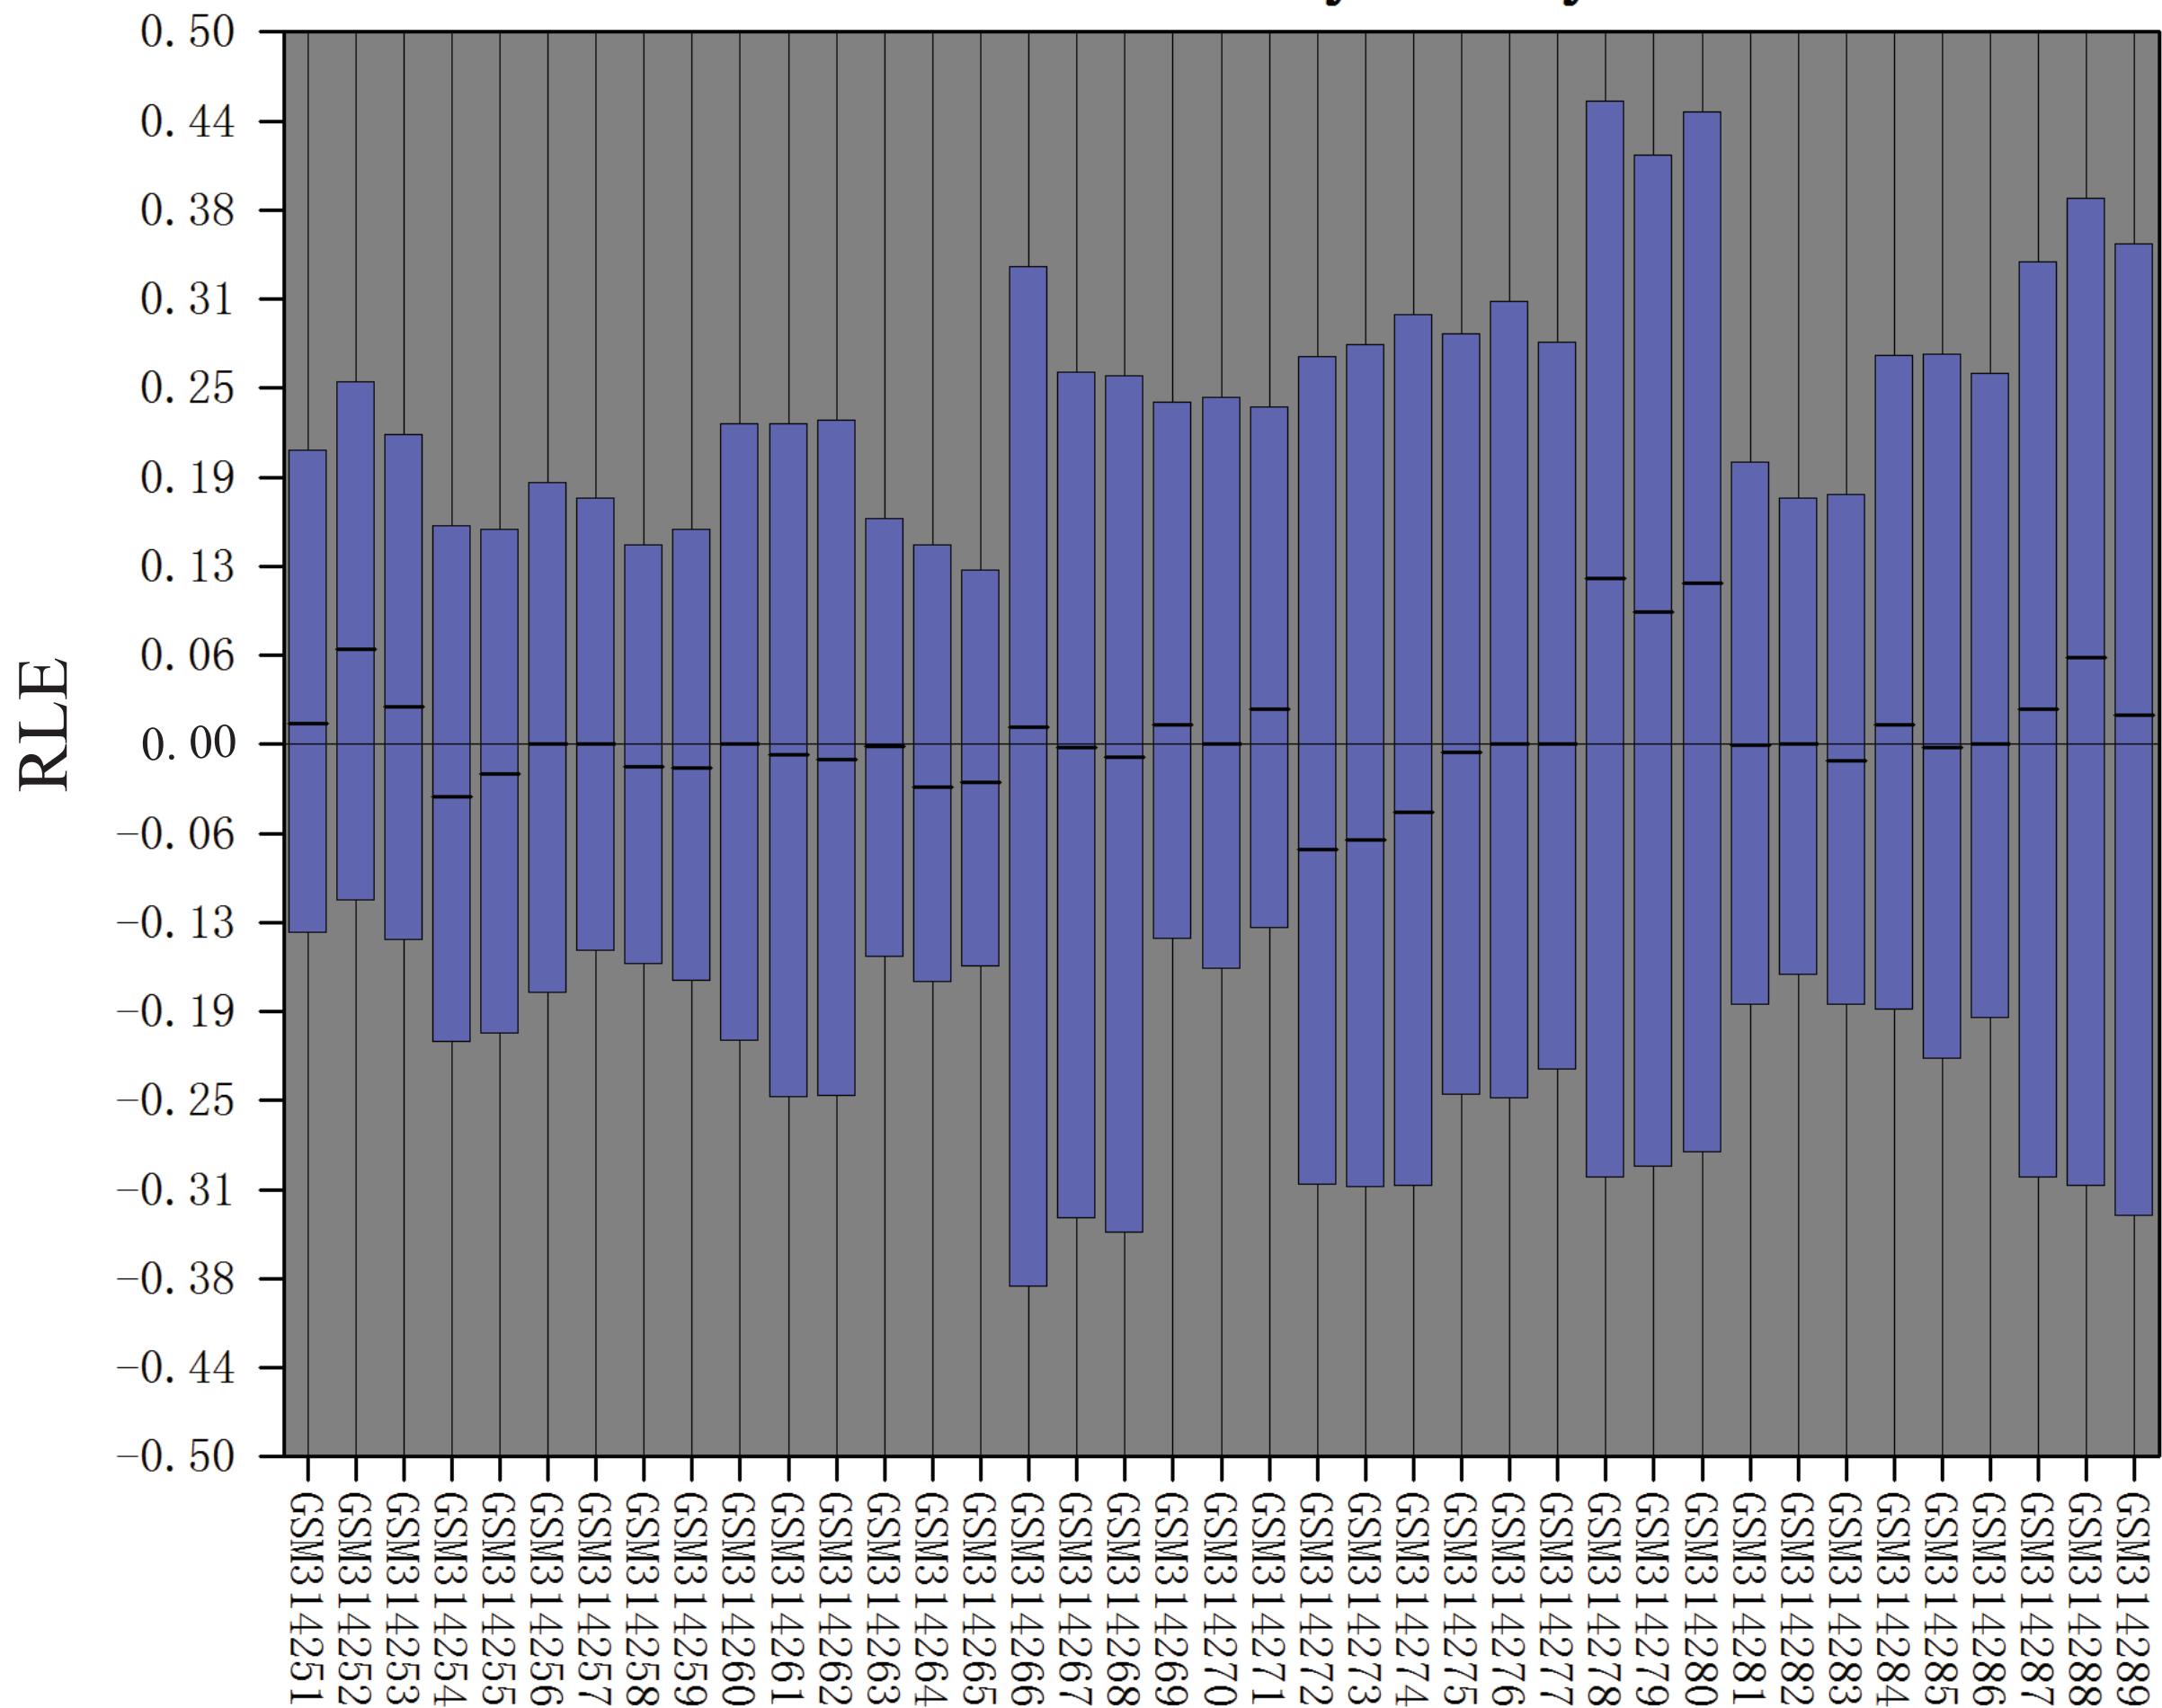

# GSE12508 (tissue)

## NUSE values by array

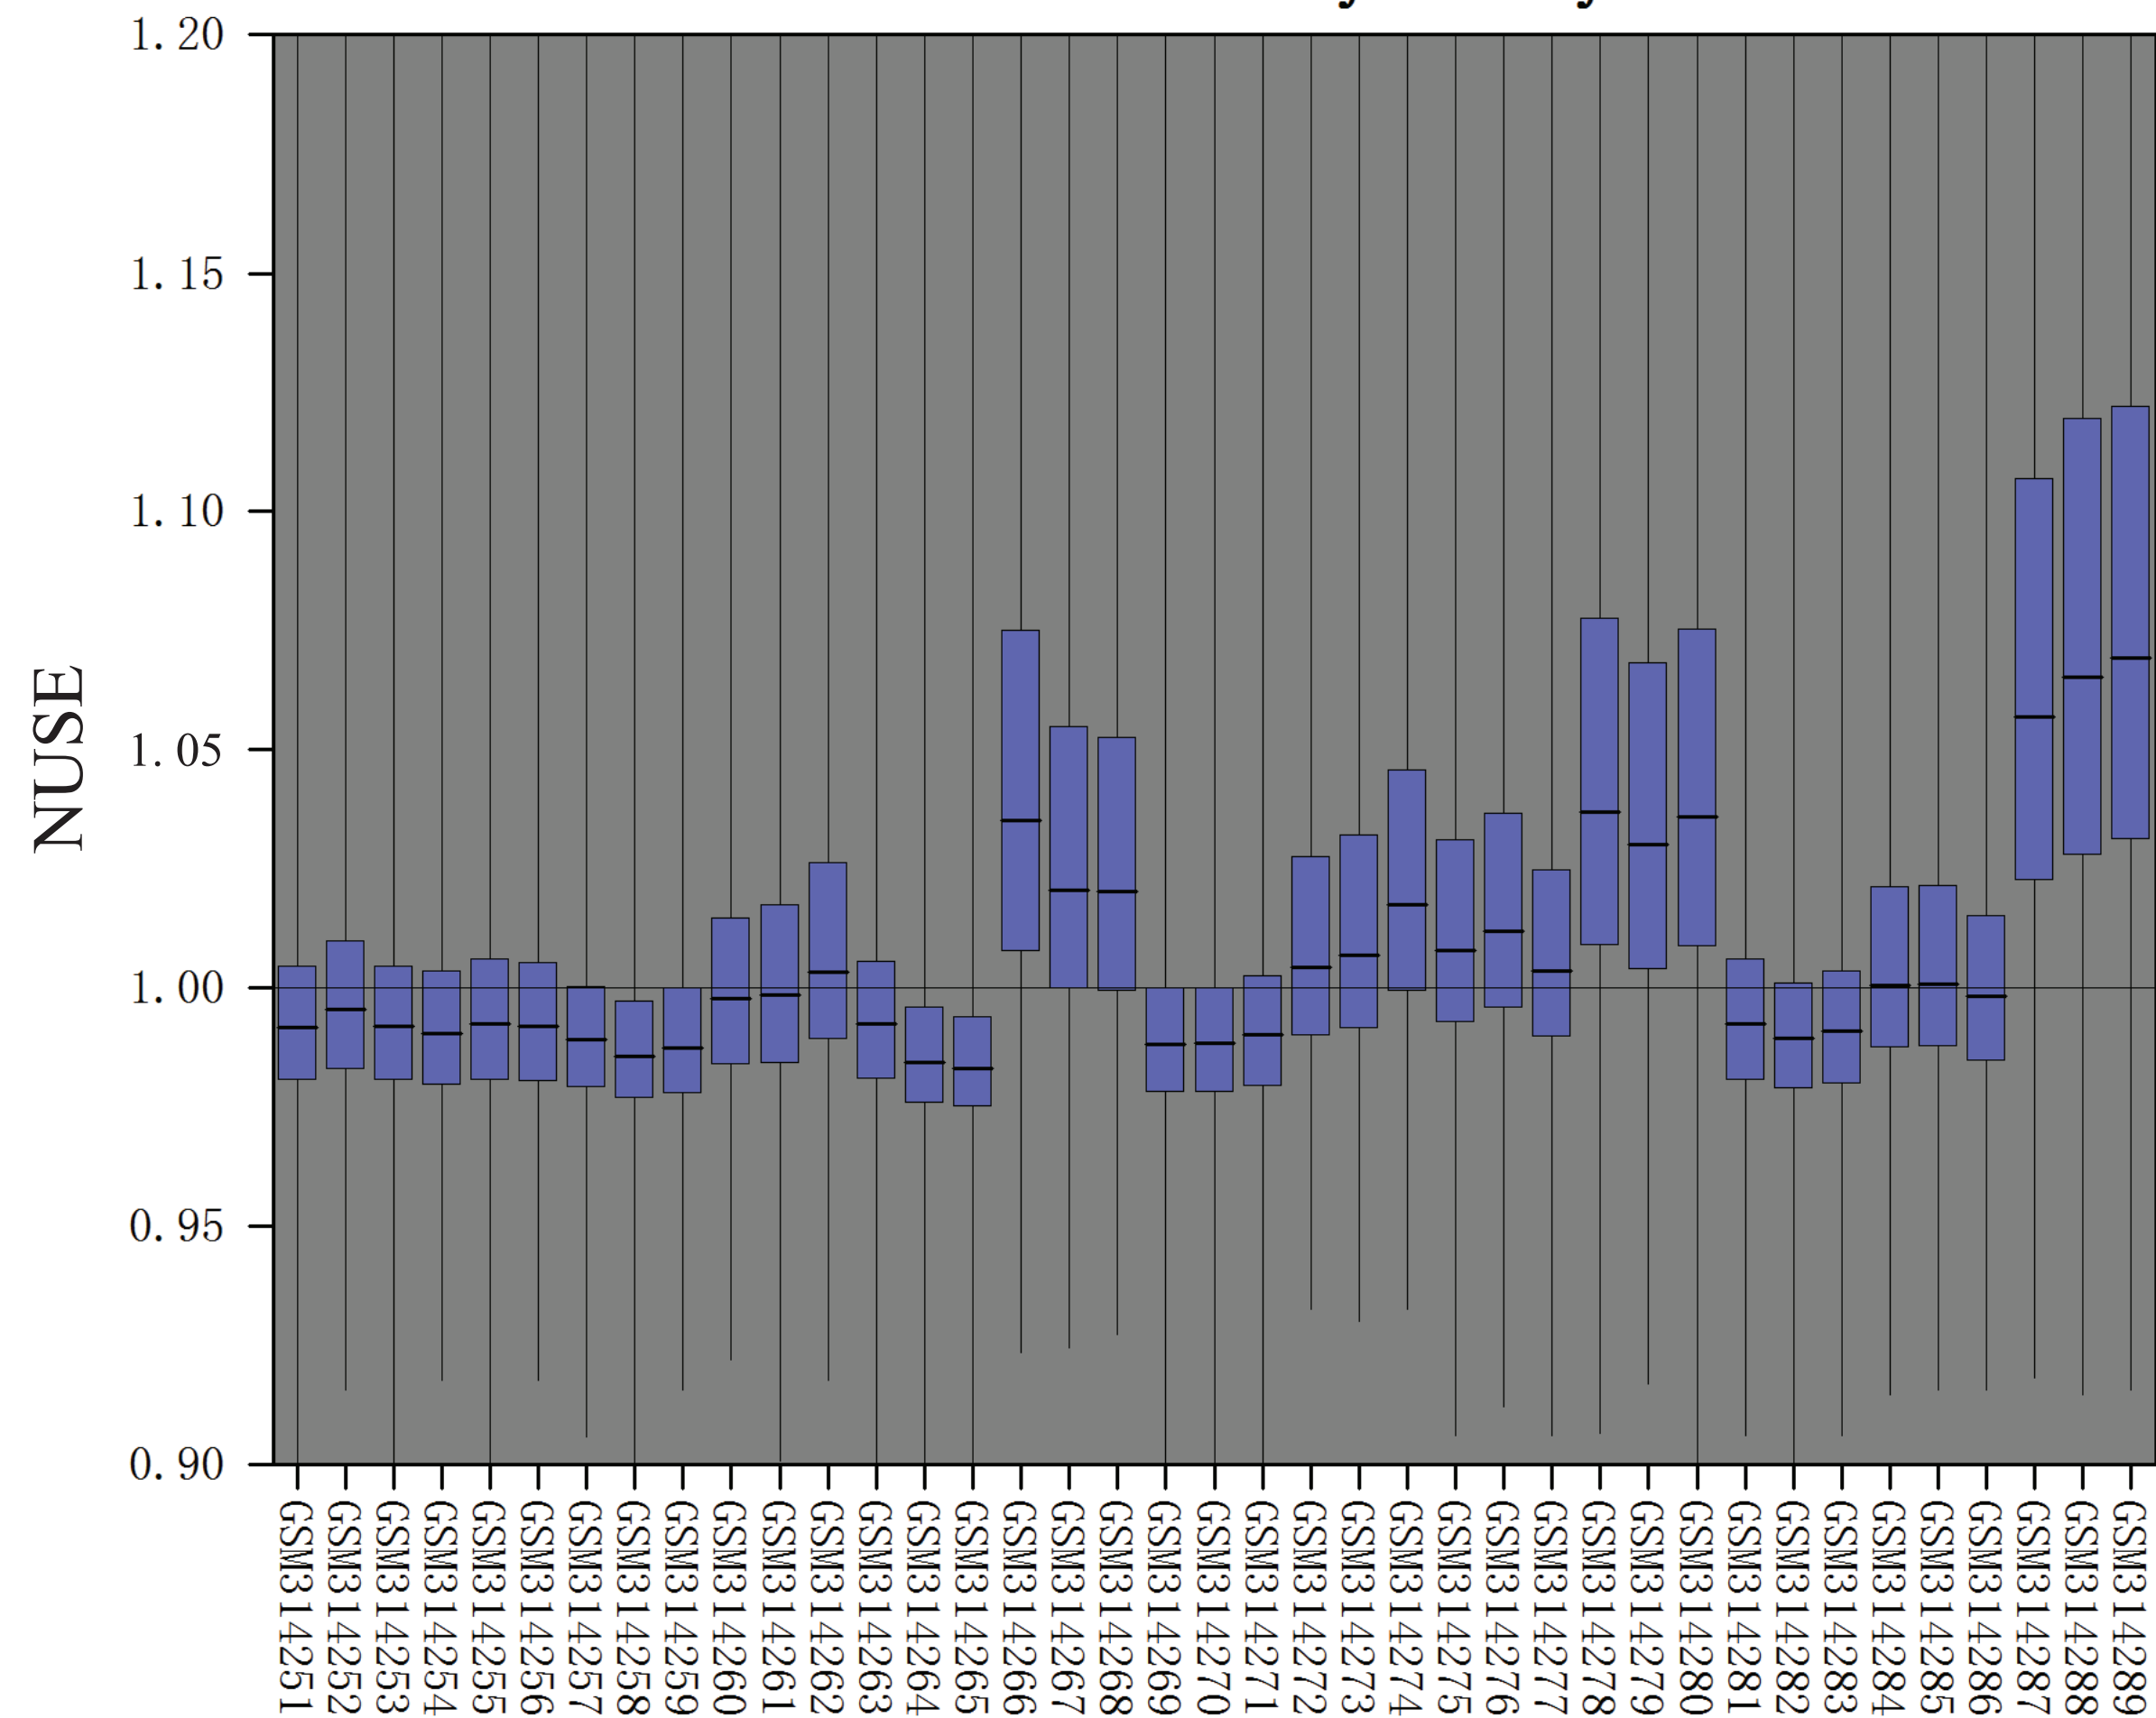

GSE14697 (cold)

RLE values by array

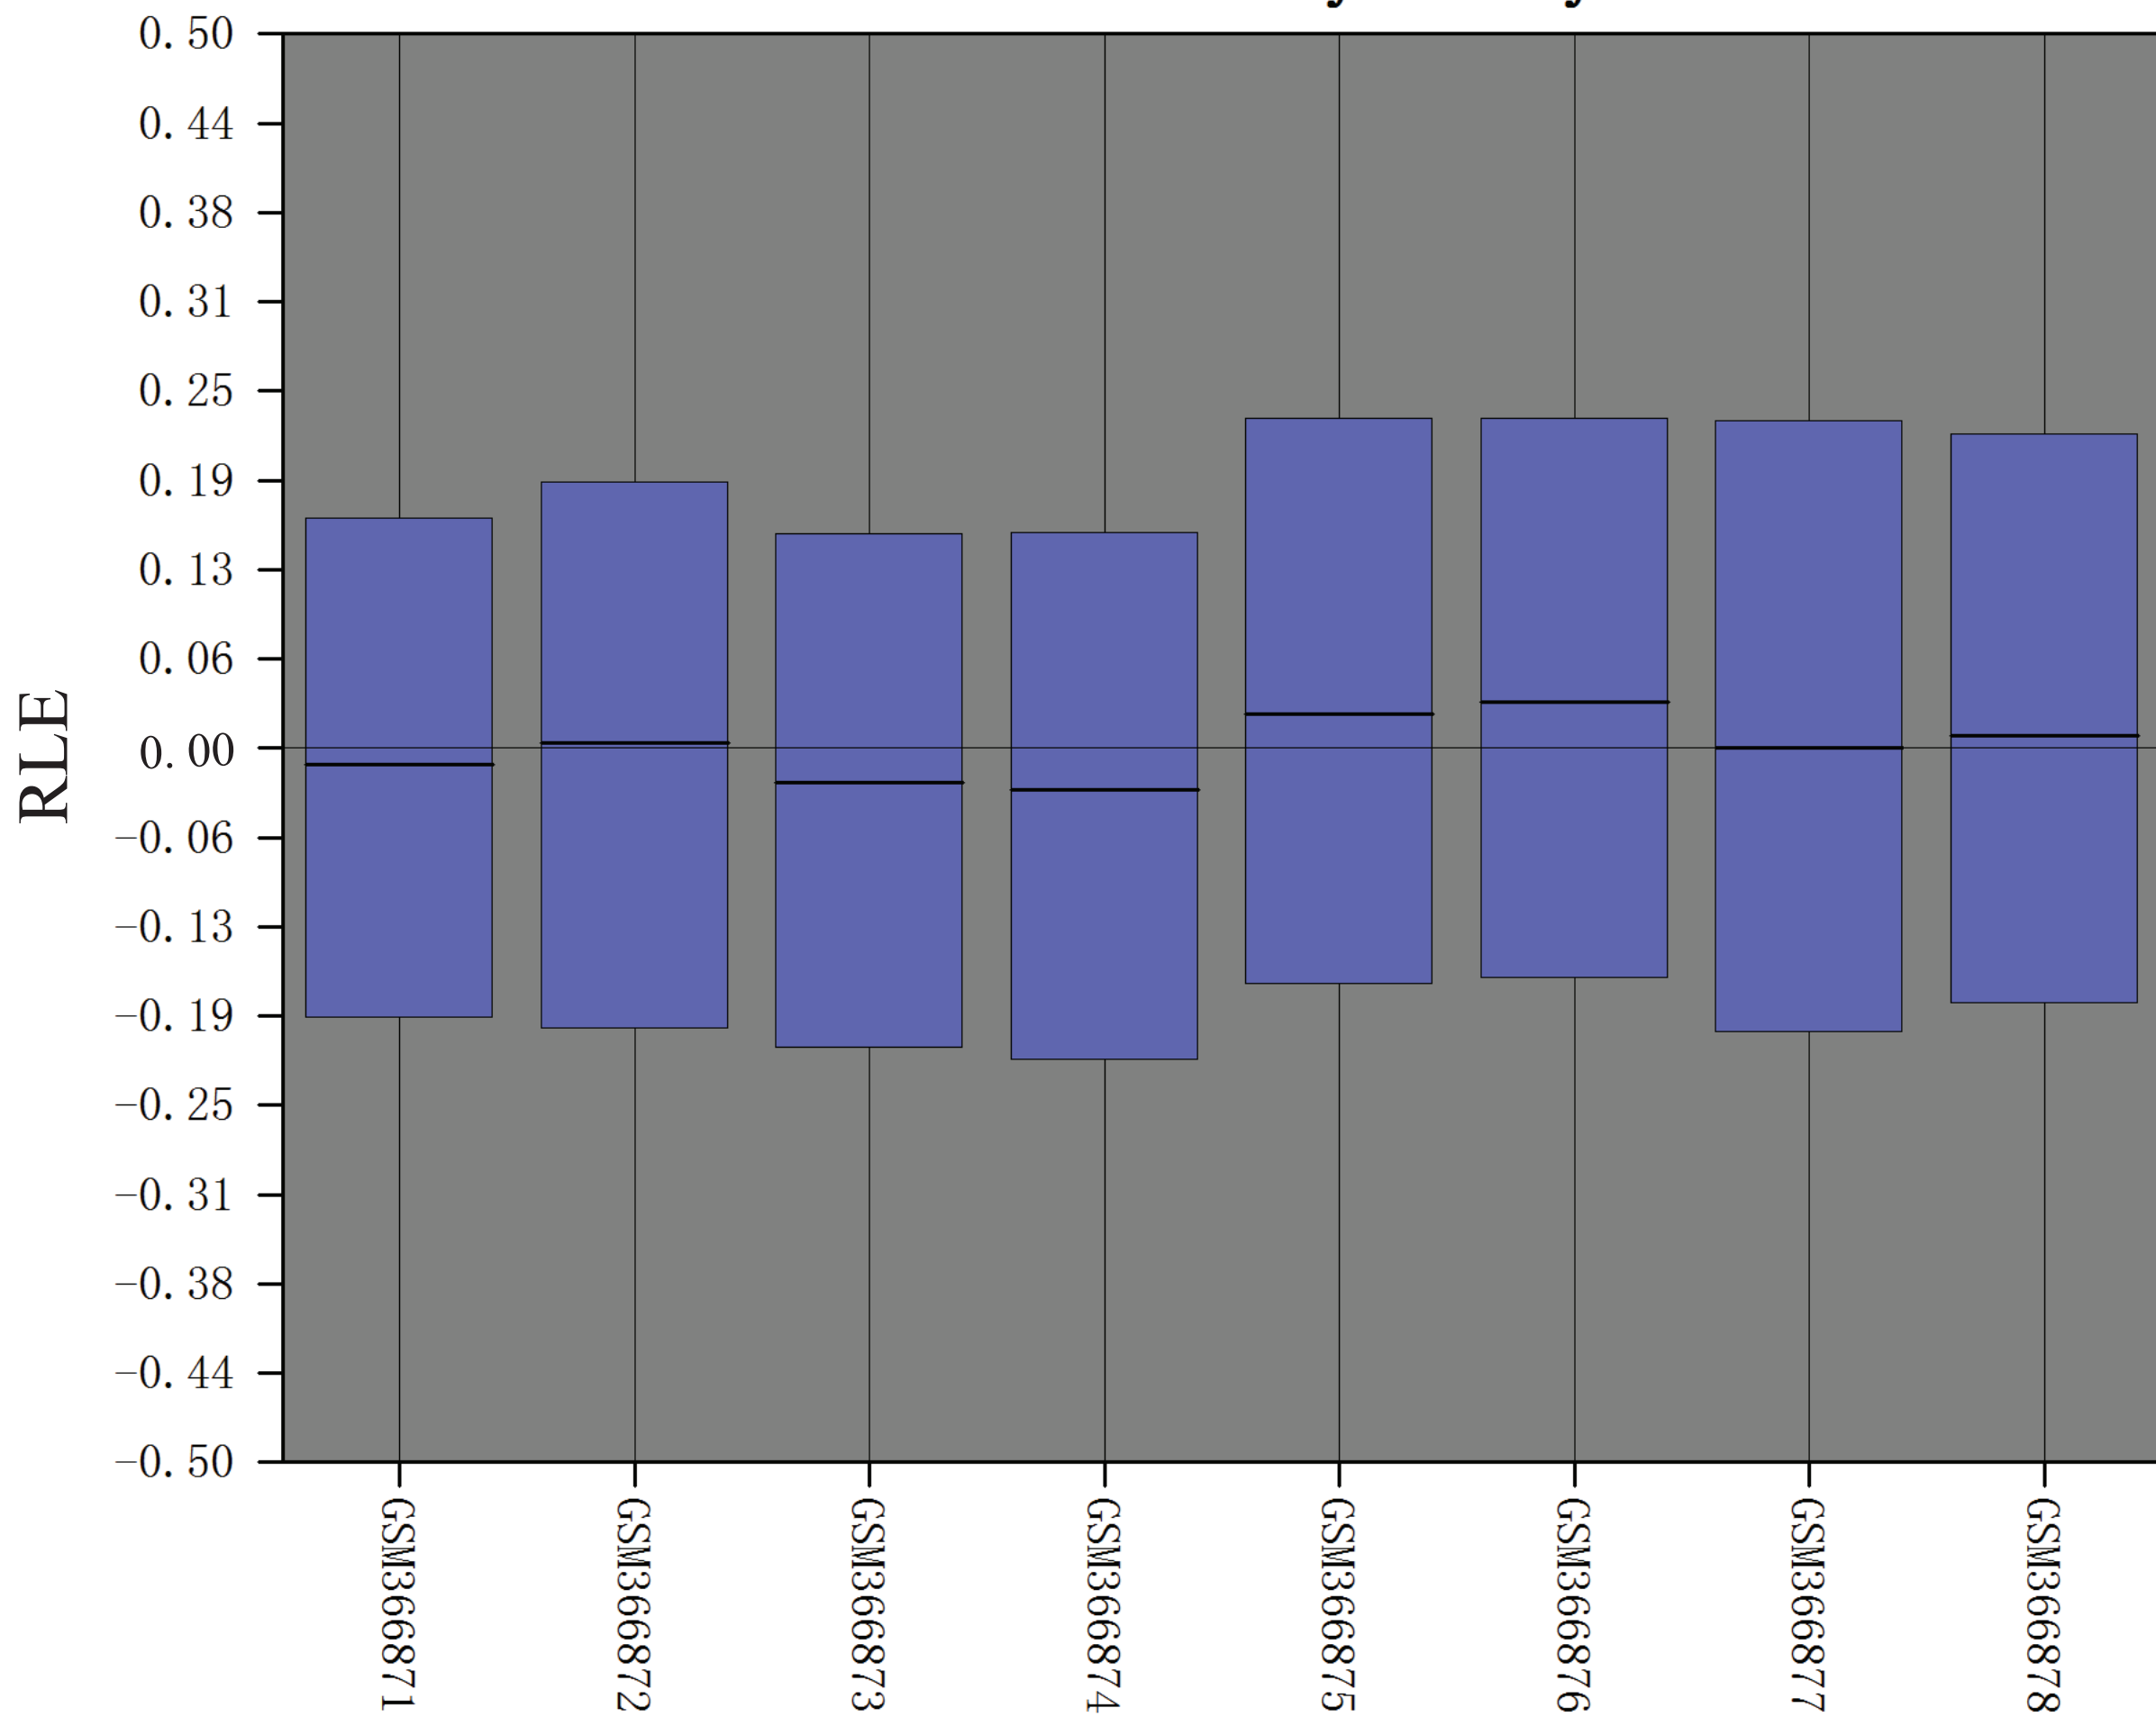

GSE14697 (cold)

NUSE values by array

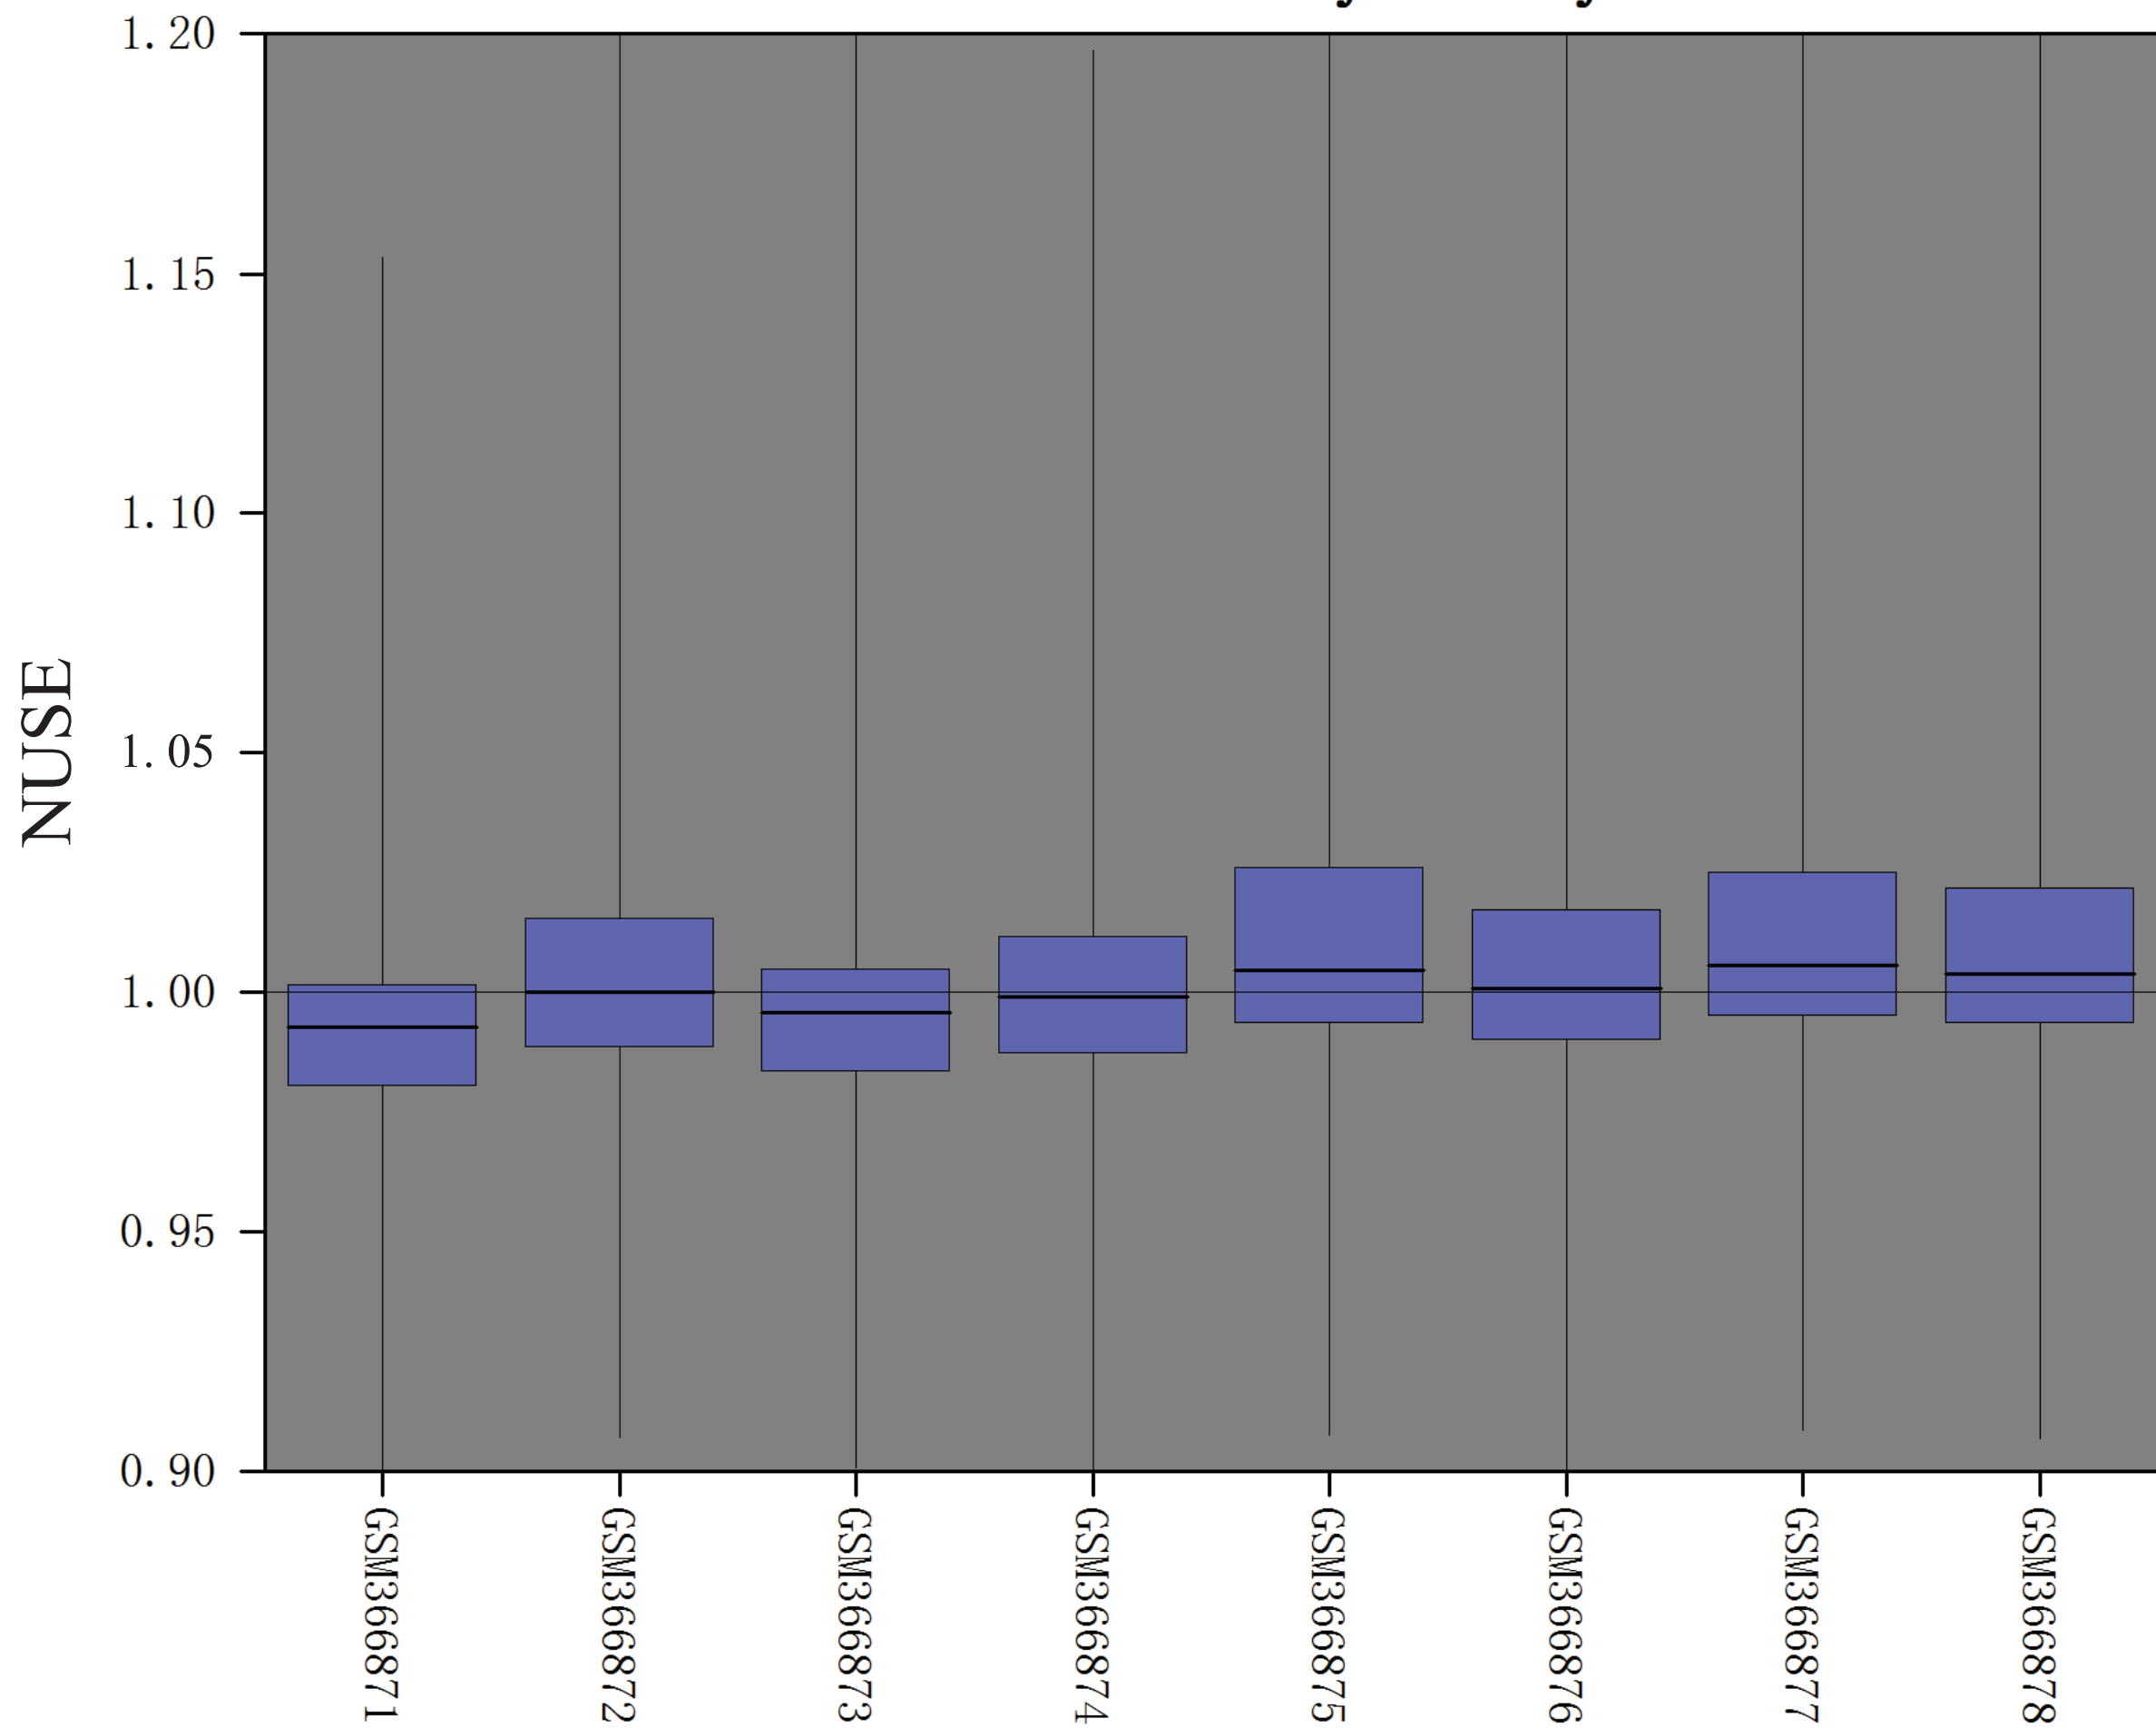

# GSE60351 (heat)

## RLE values by array

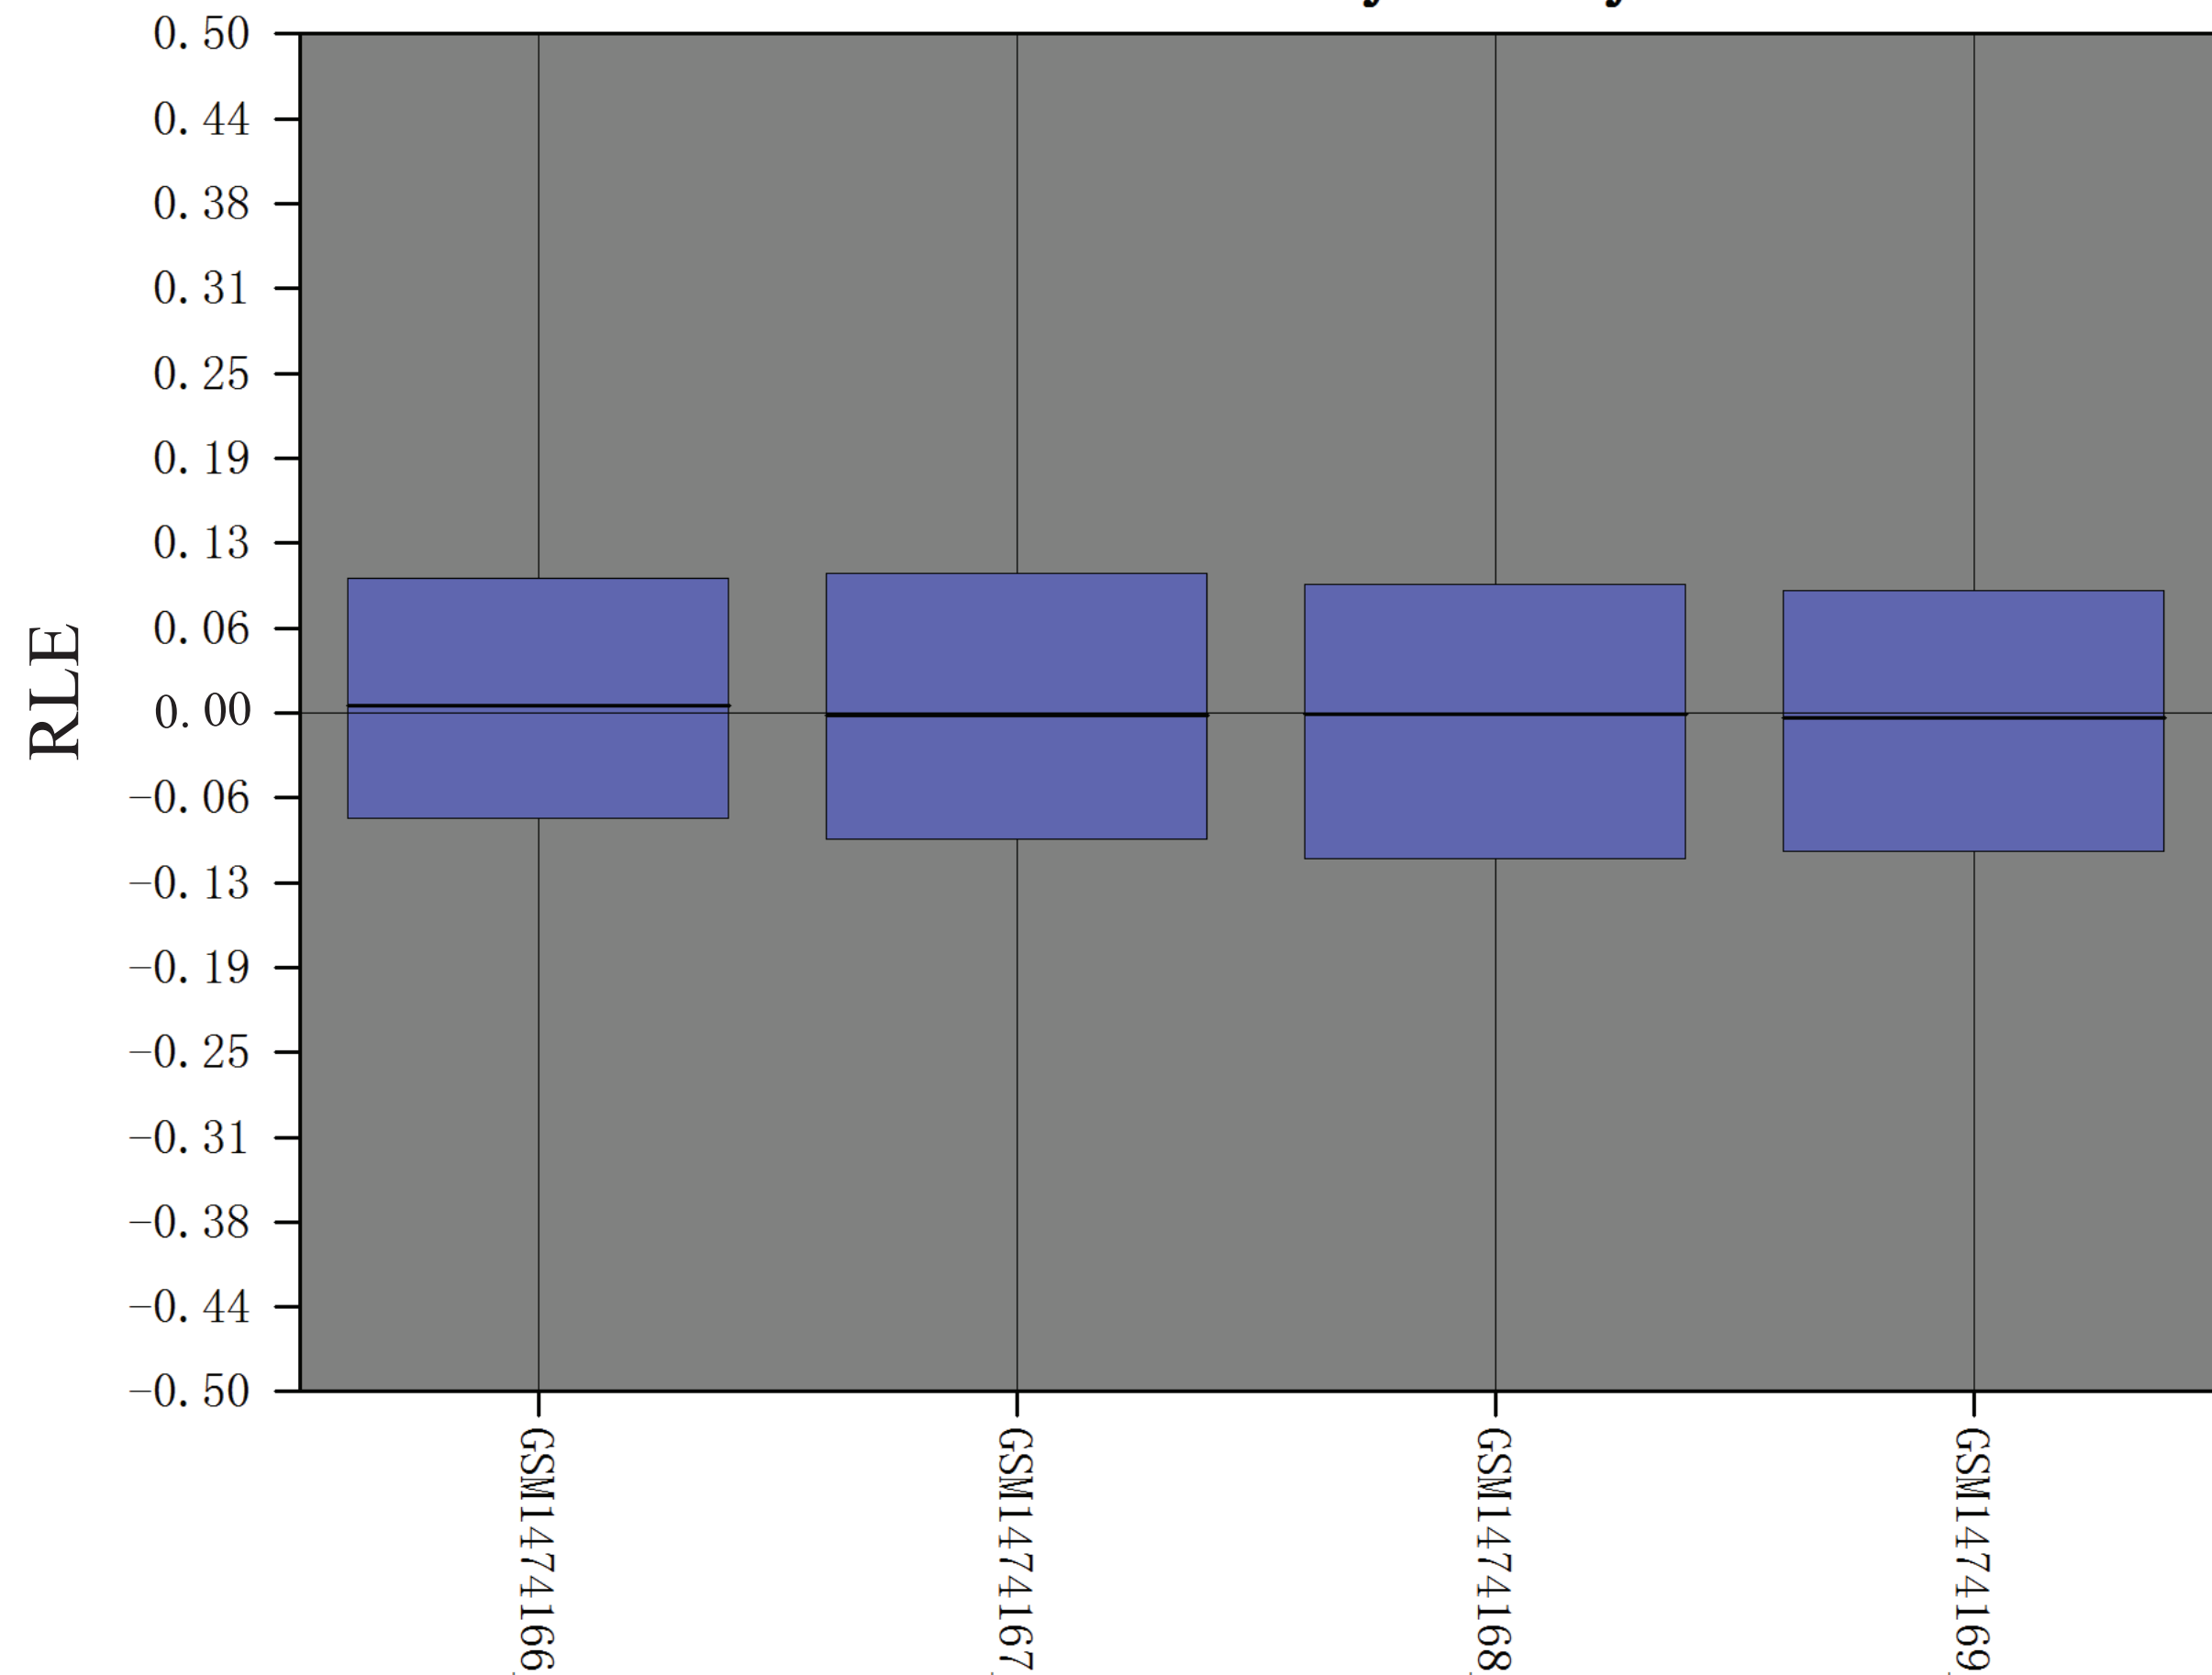

# GSE60351 (heat)

## NUSE values by array

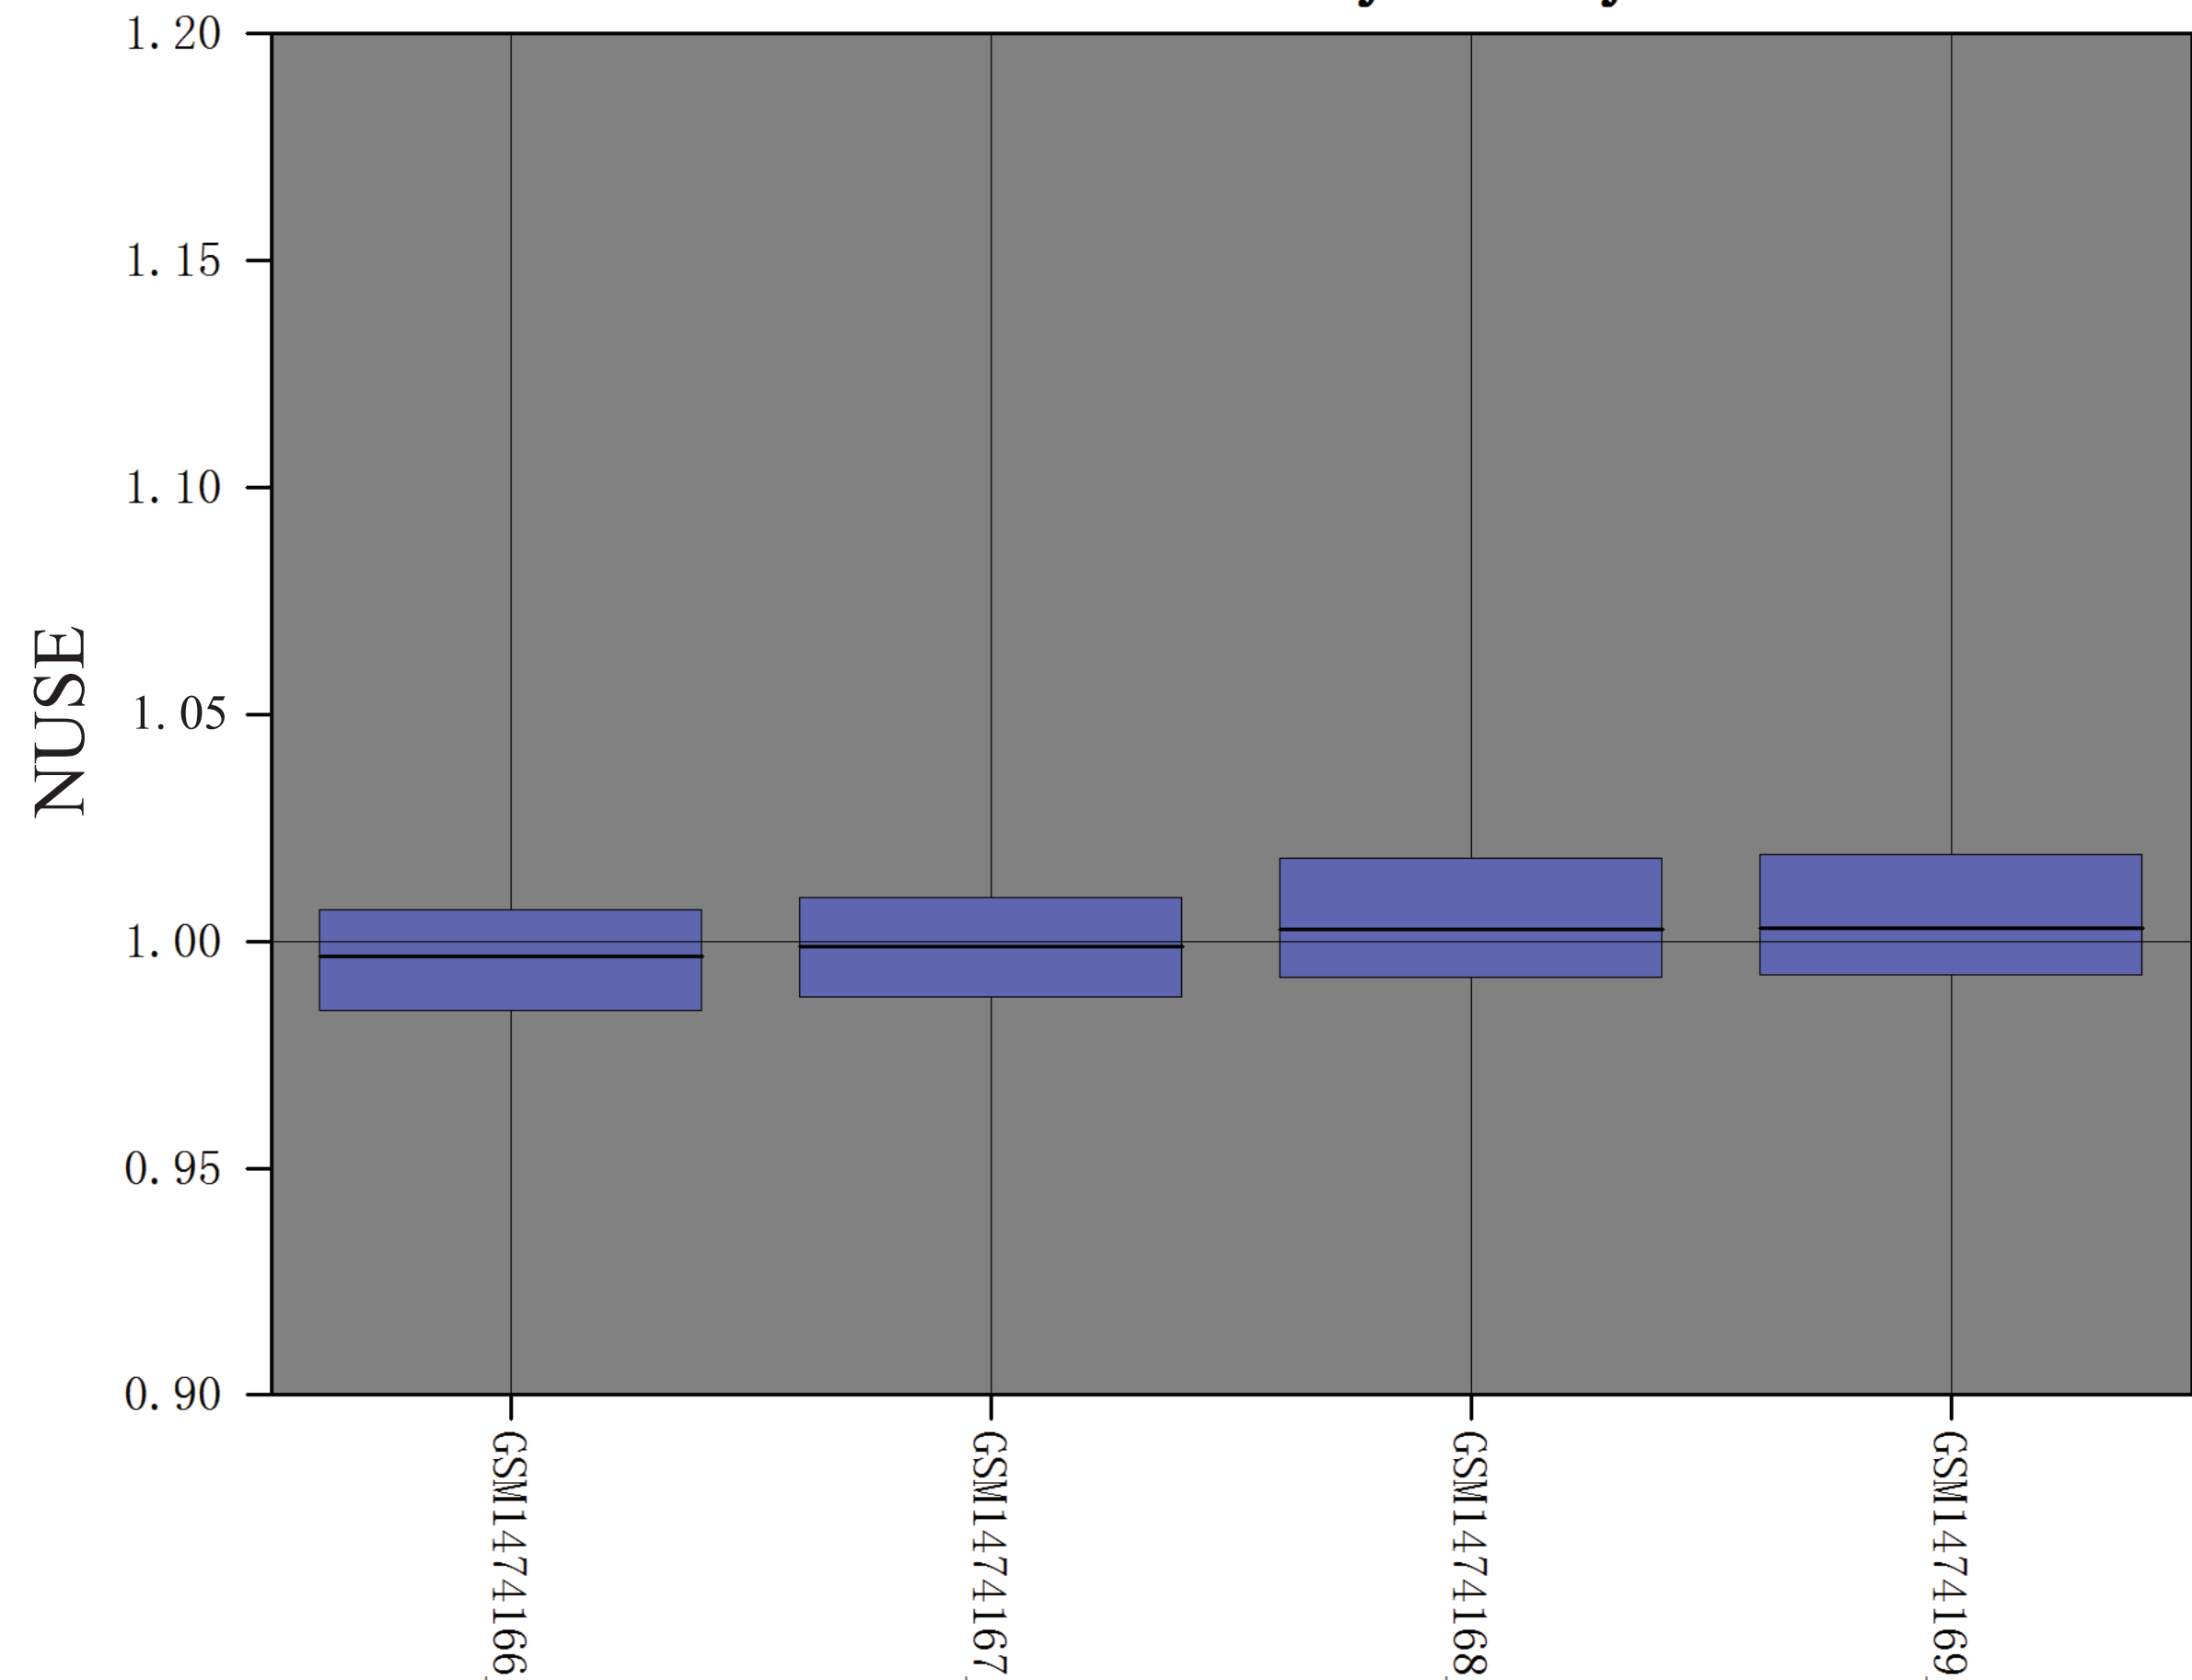

# GSE87325 (drought)

## RLE values by array

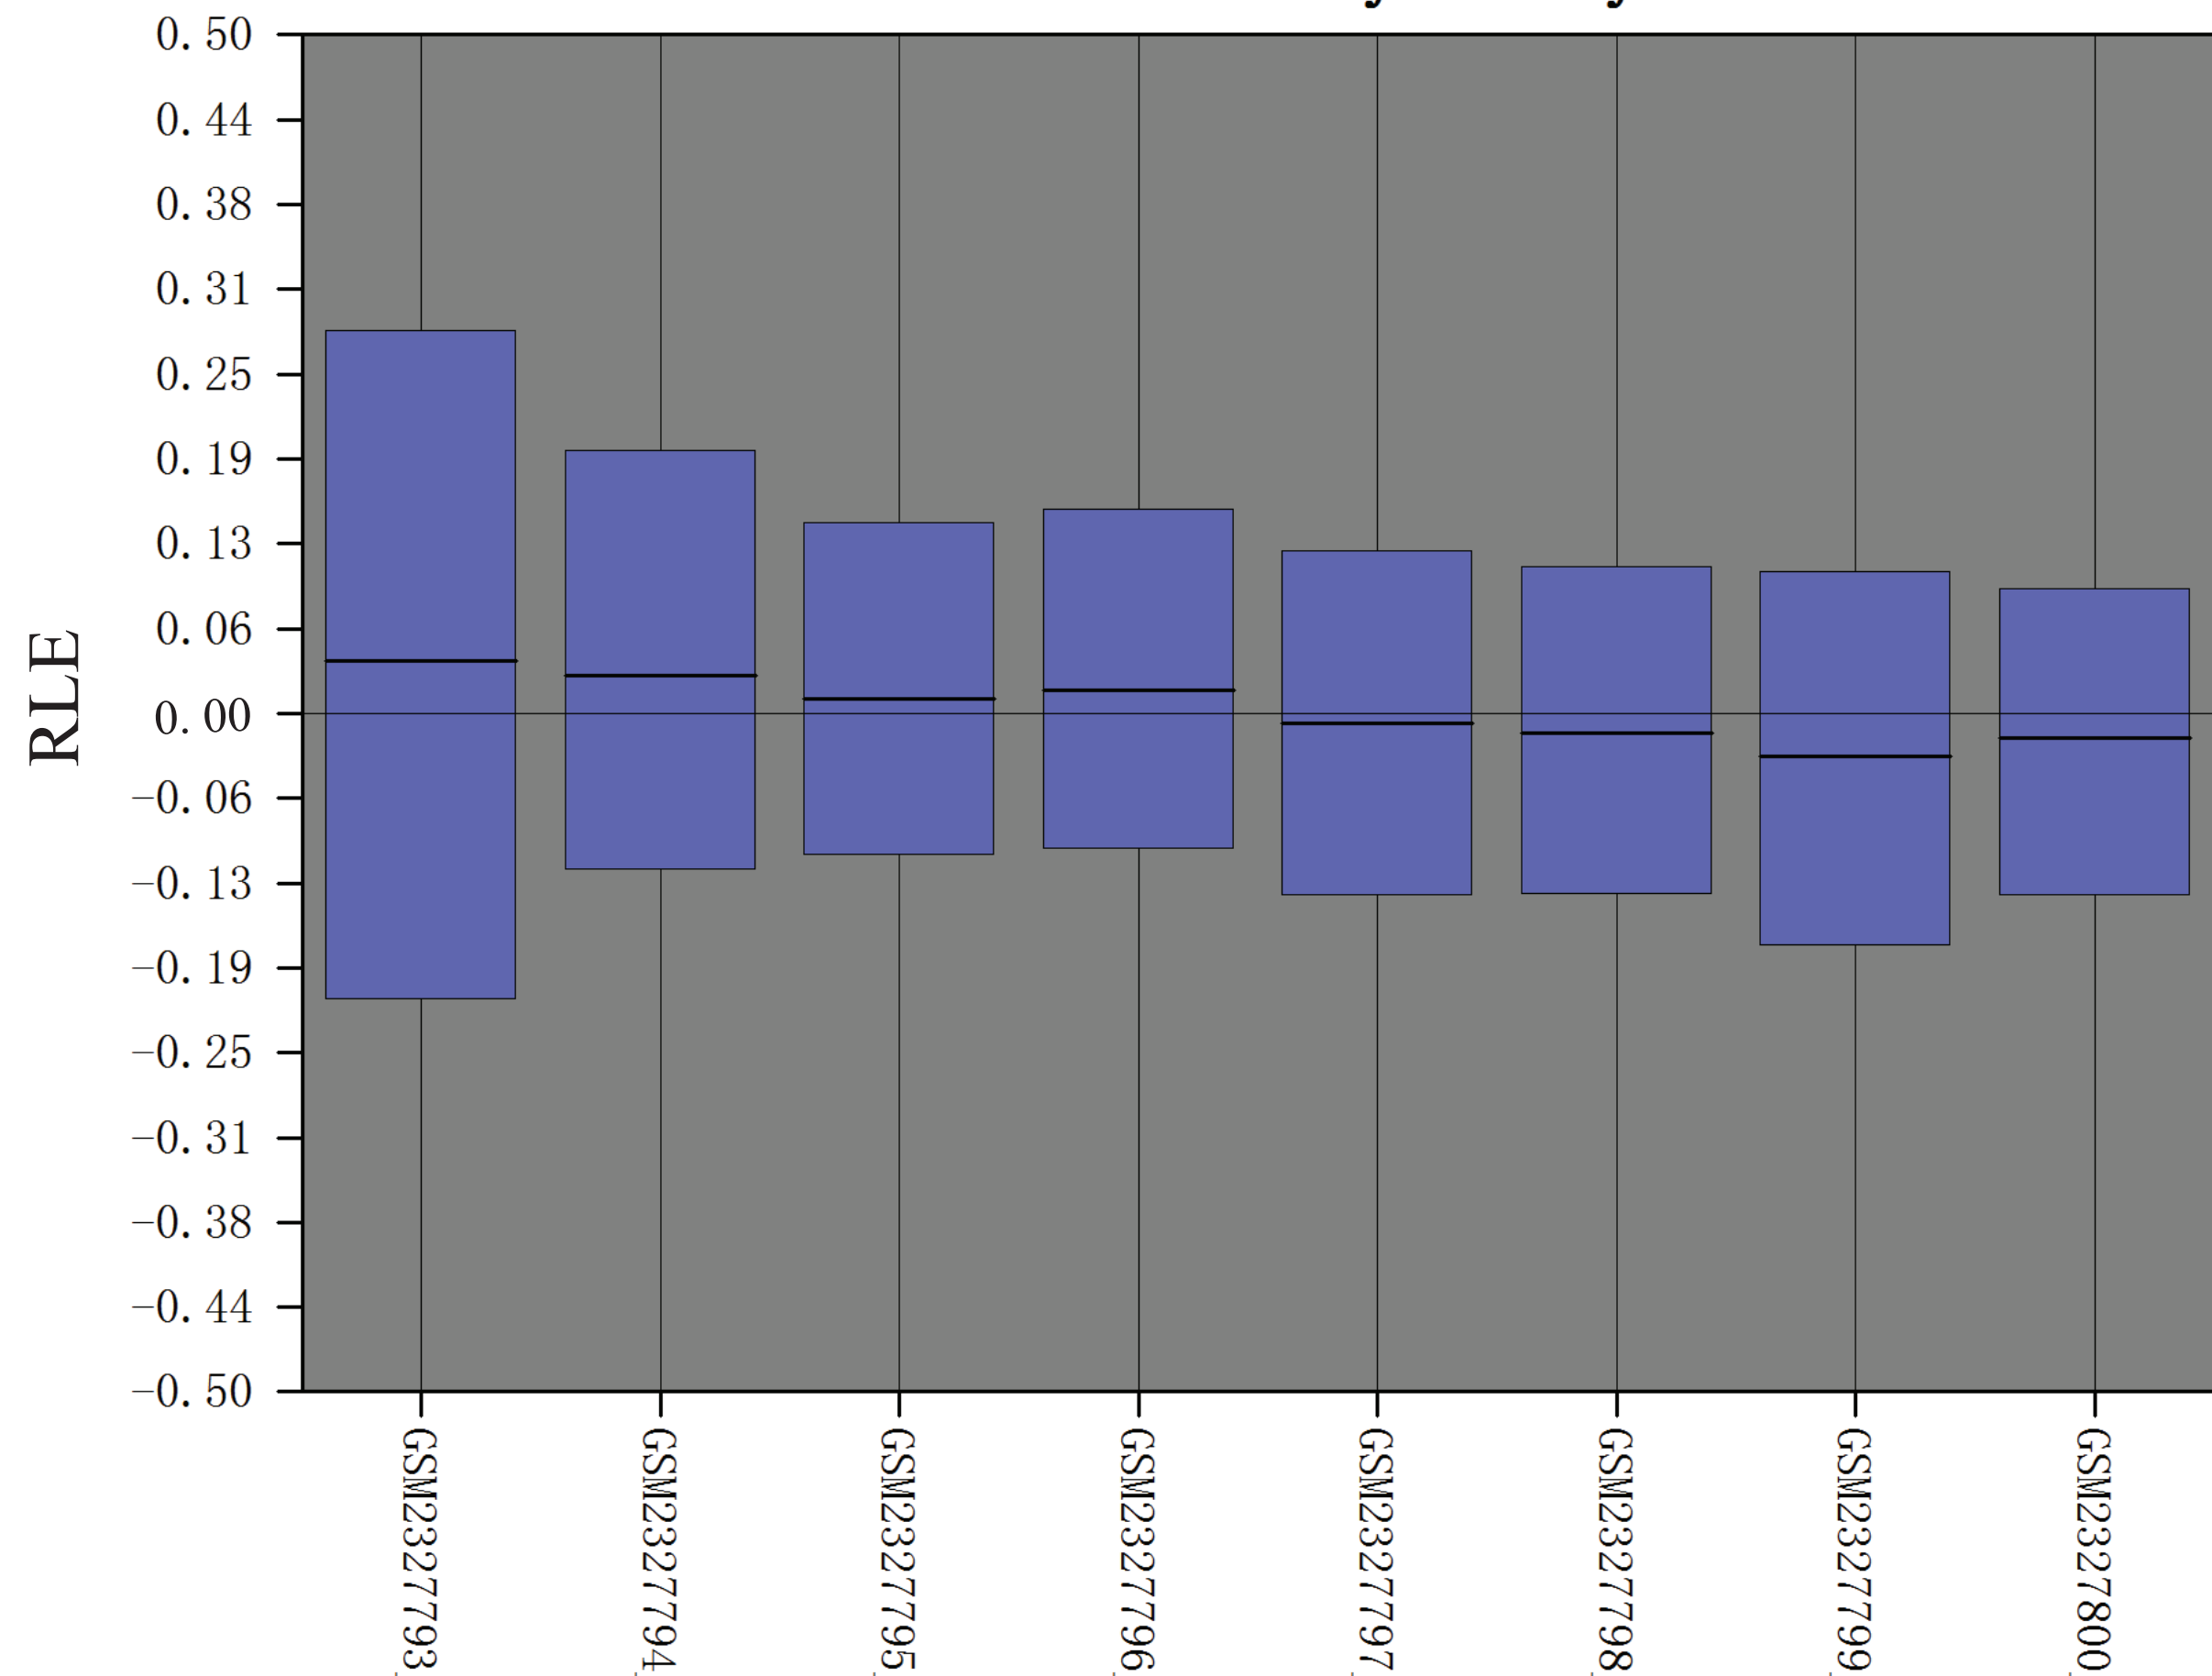

# GSE87325 (drought)

## NUSE values by array

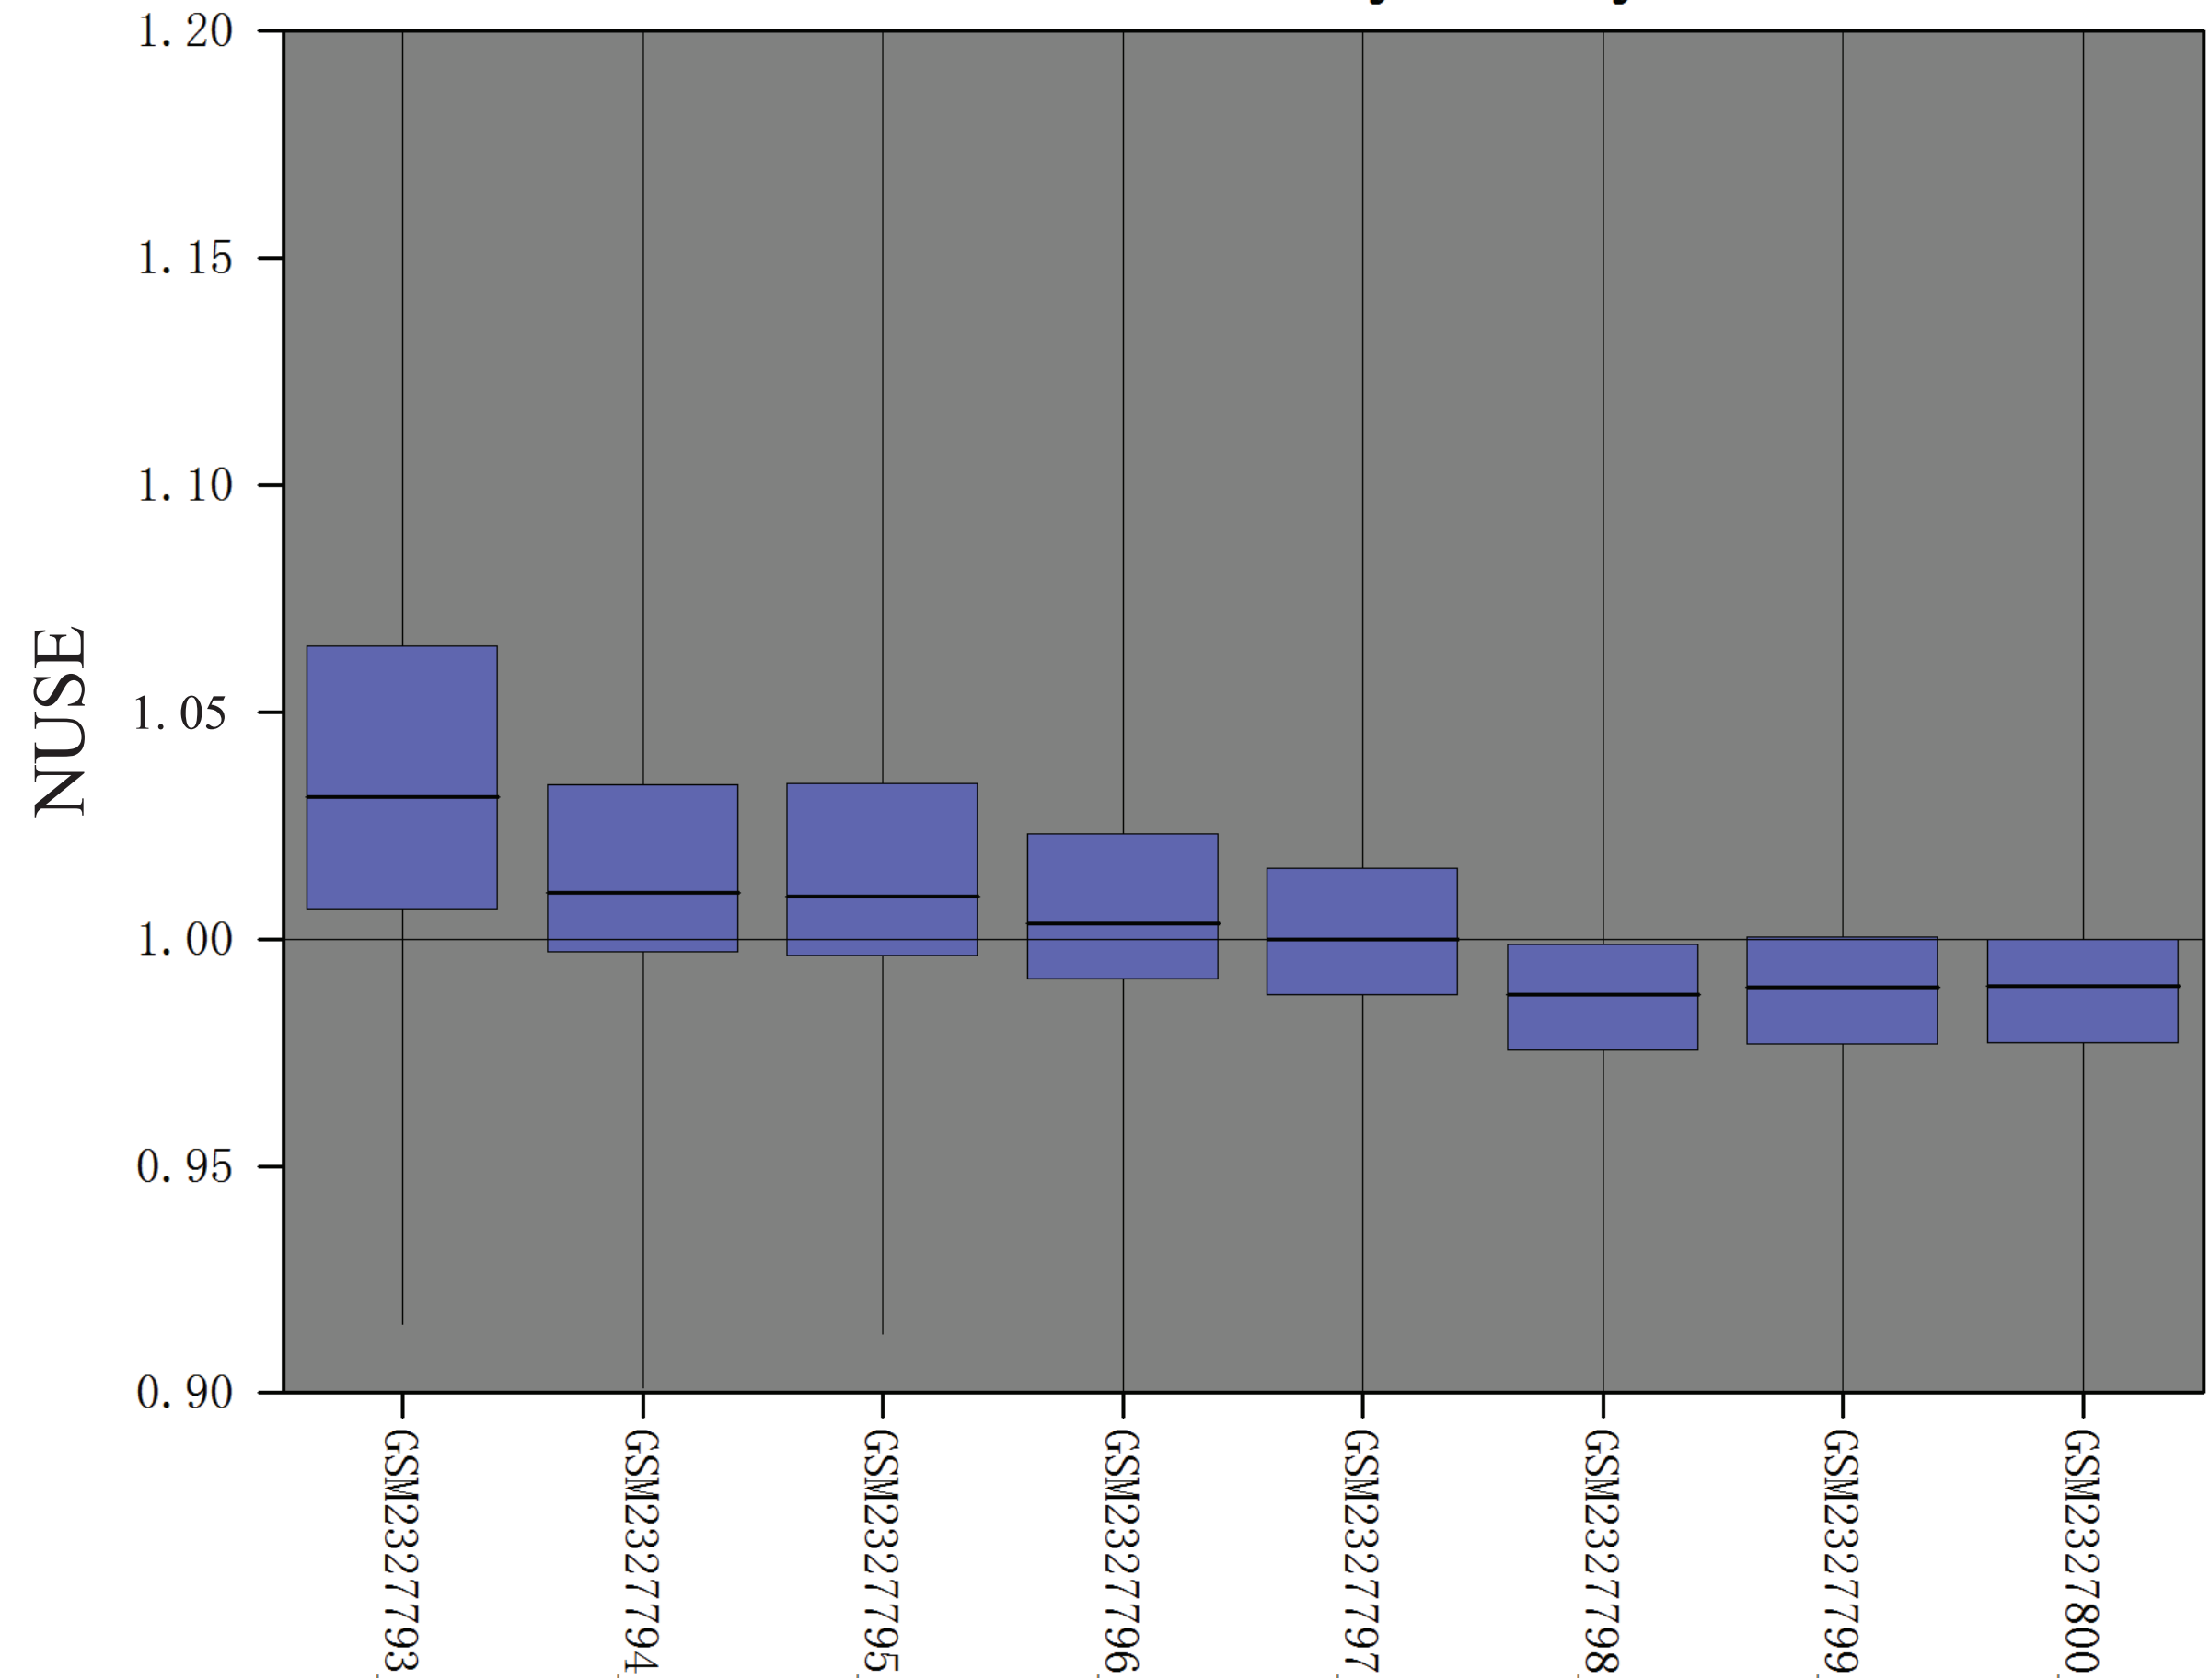



# GSE61679 (nutrient deficient)

## RLE values by array

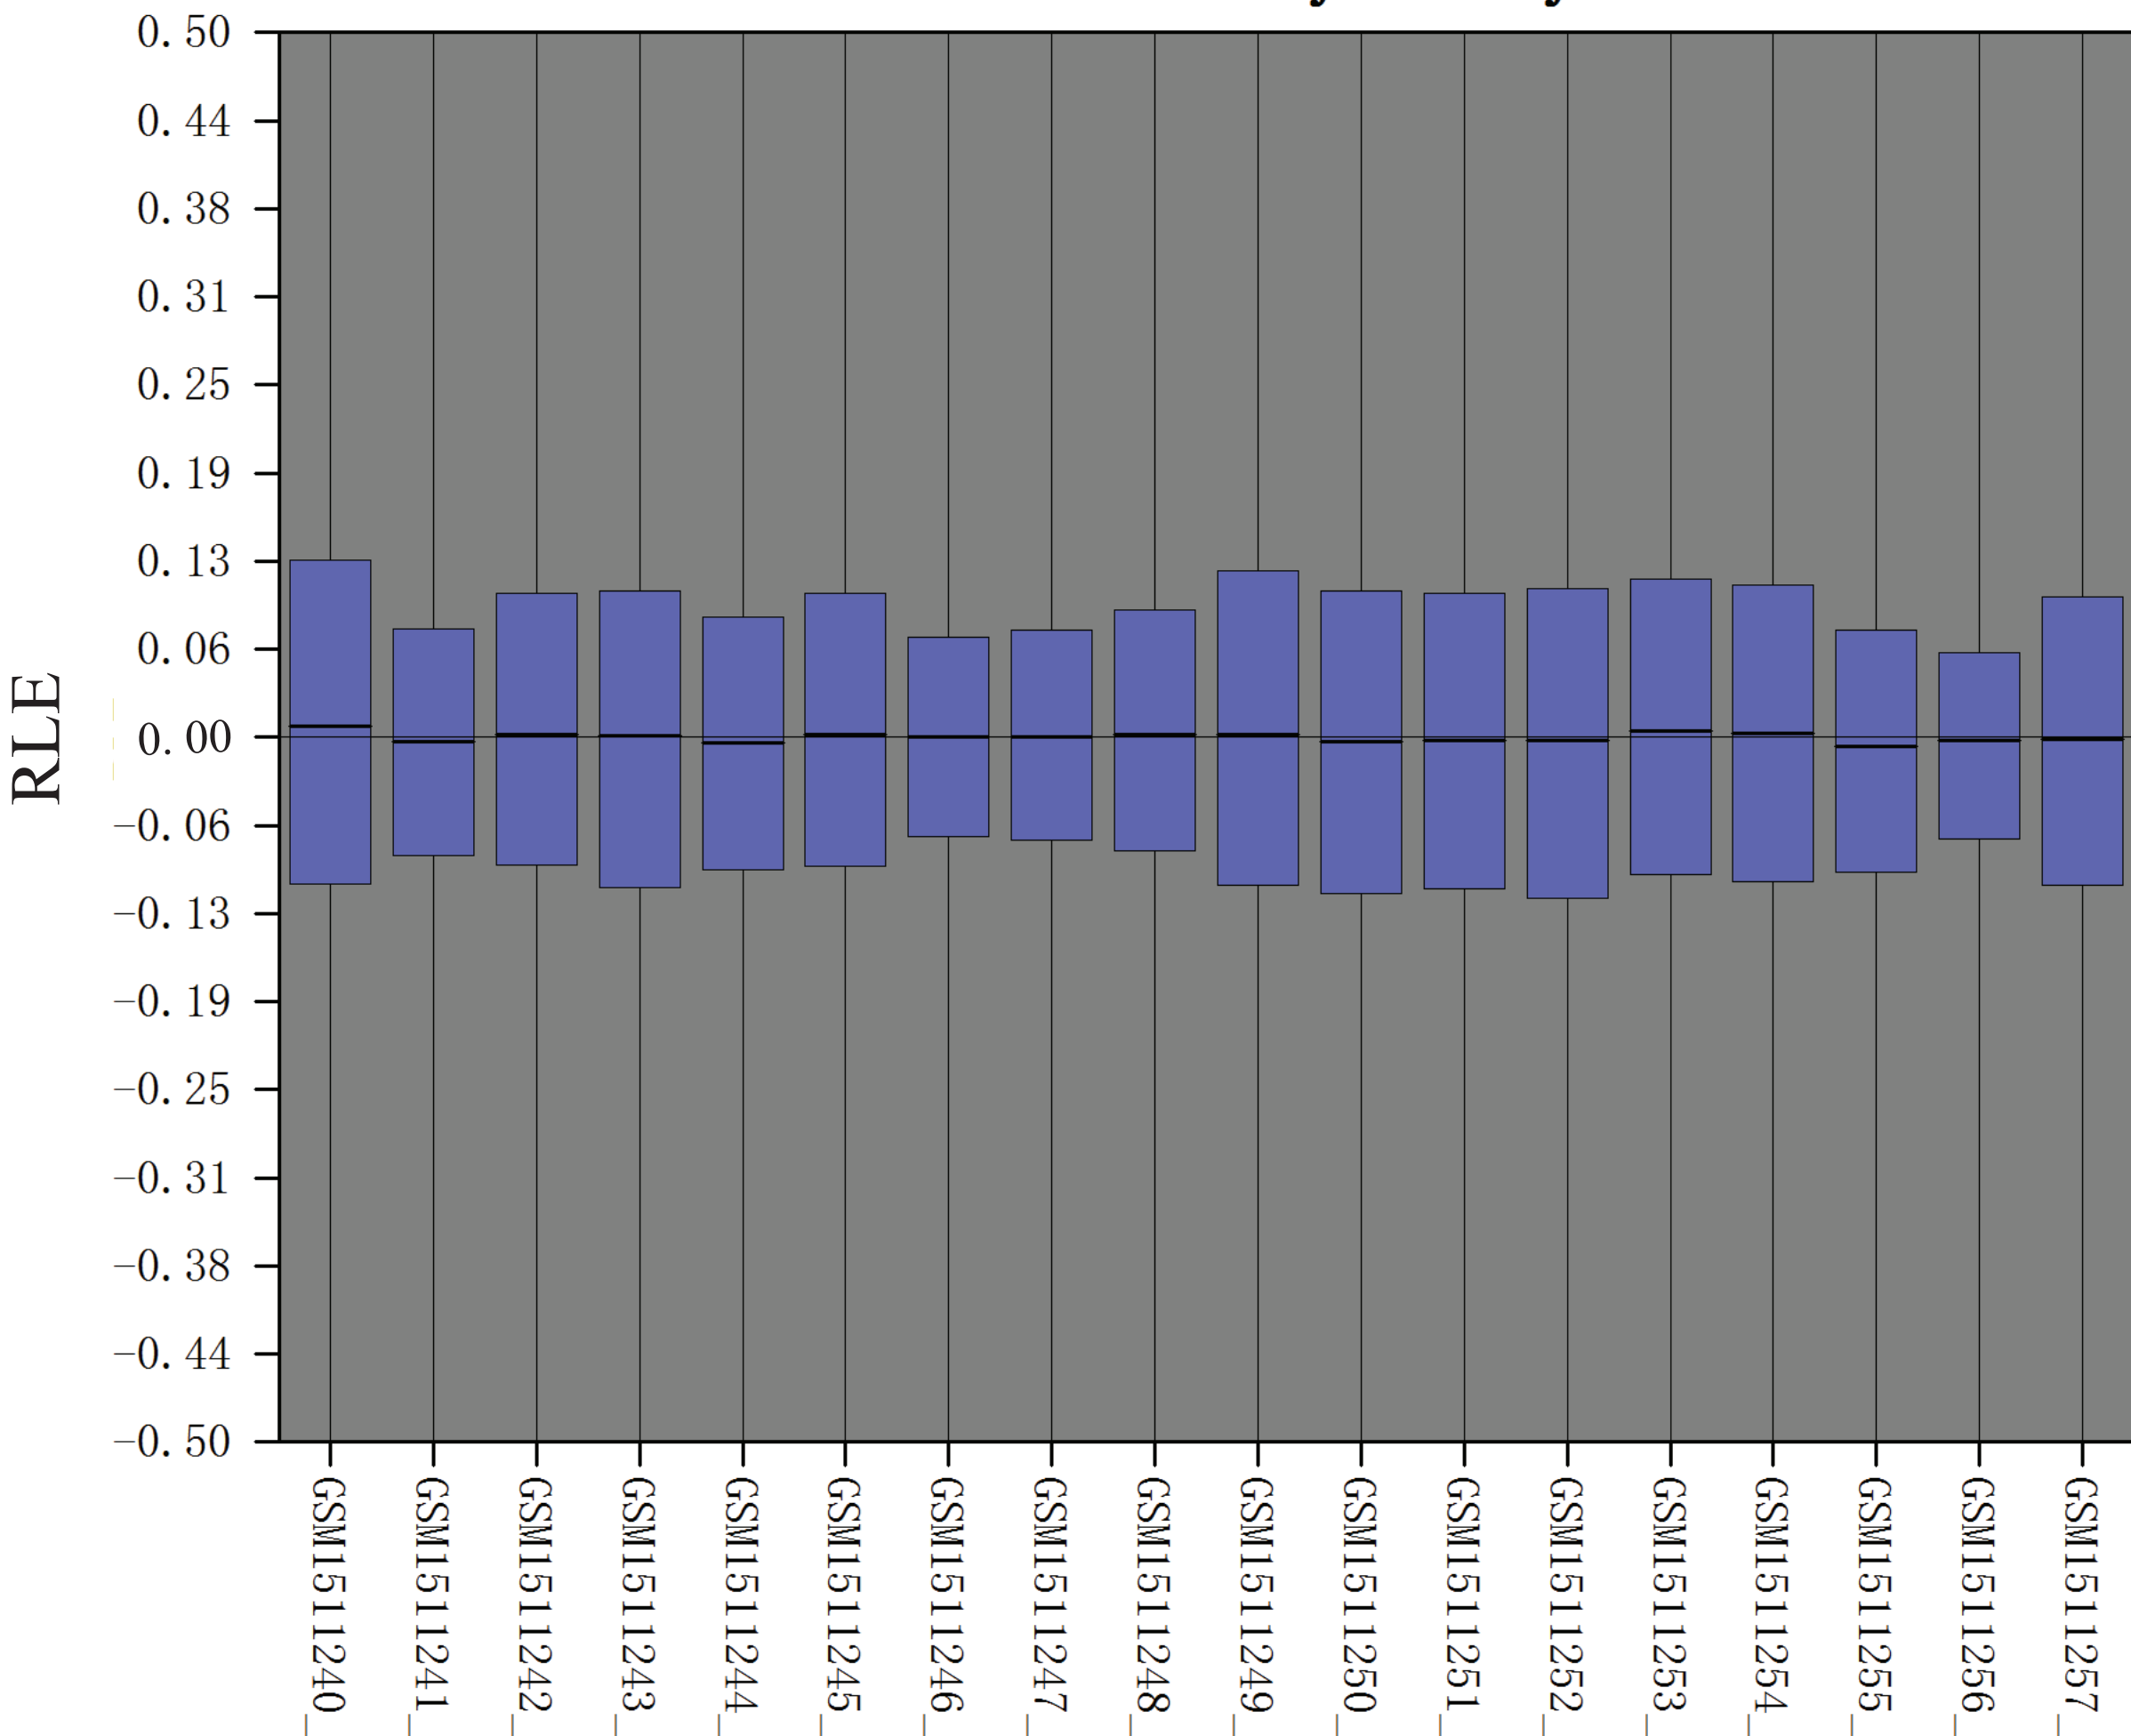

# GSE61679 (nutrient deficient)

## NUSE values by array

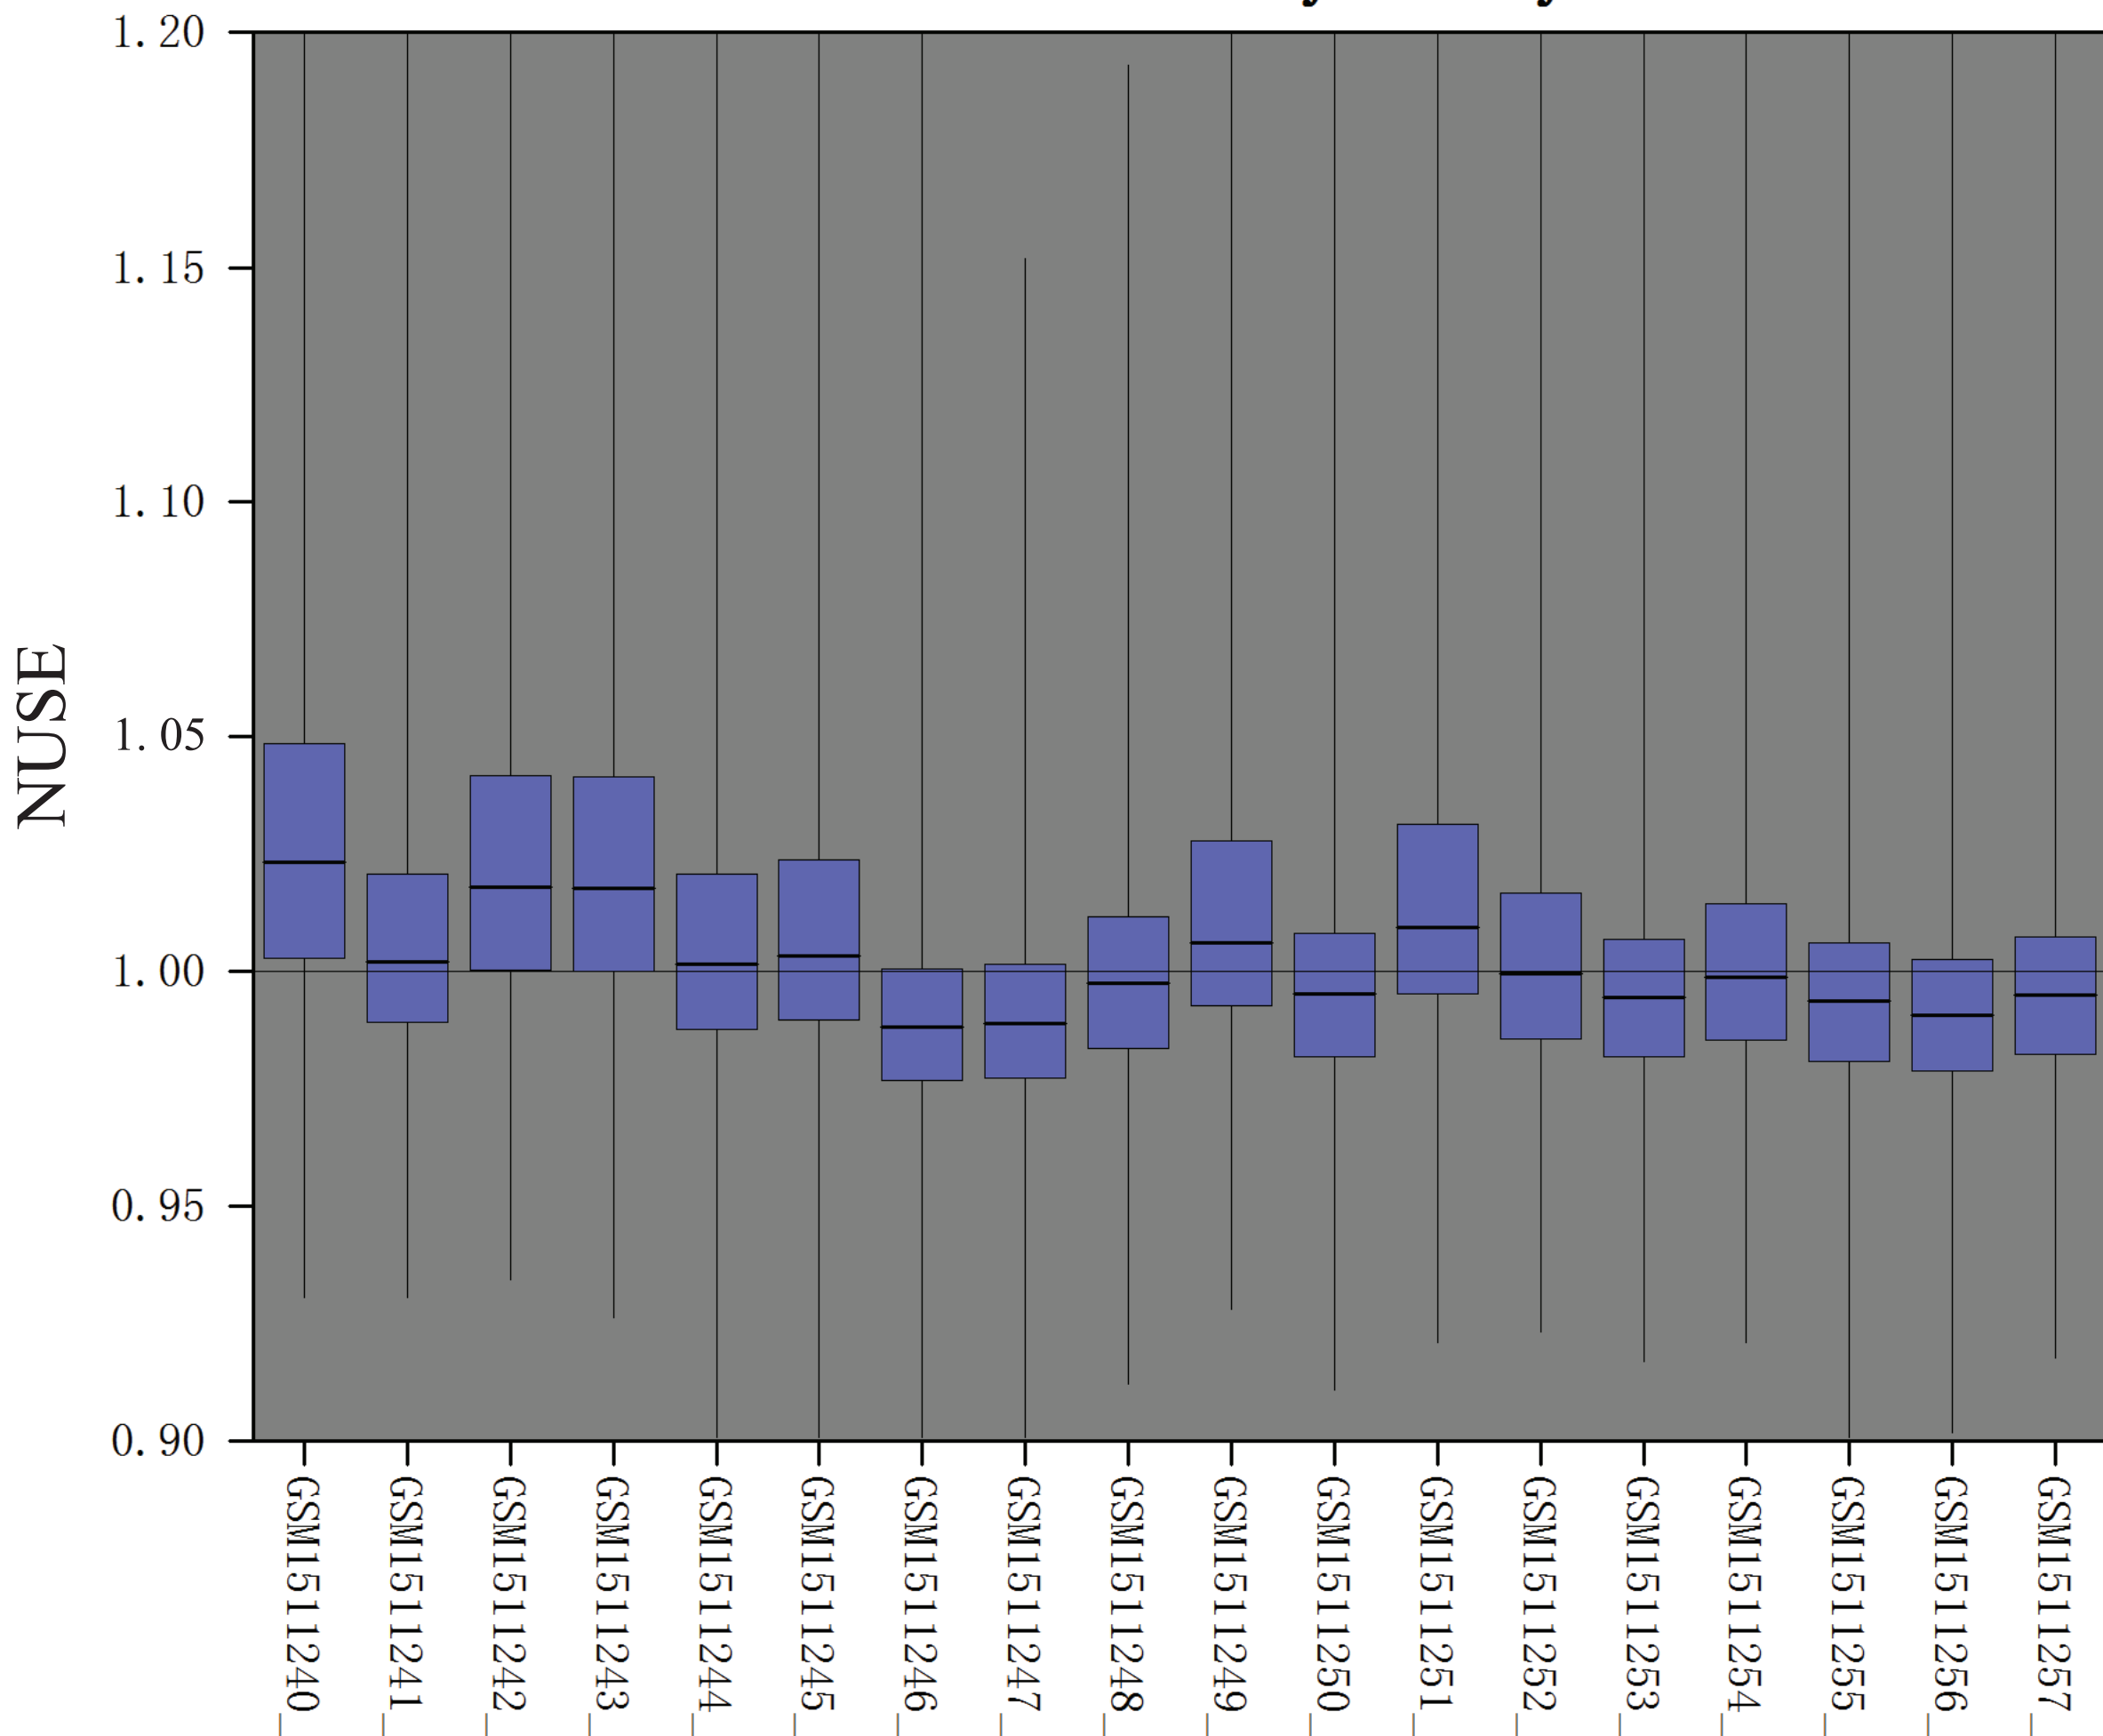

# GSE103430 (seven phytohormones)

## RLE values by array

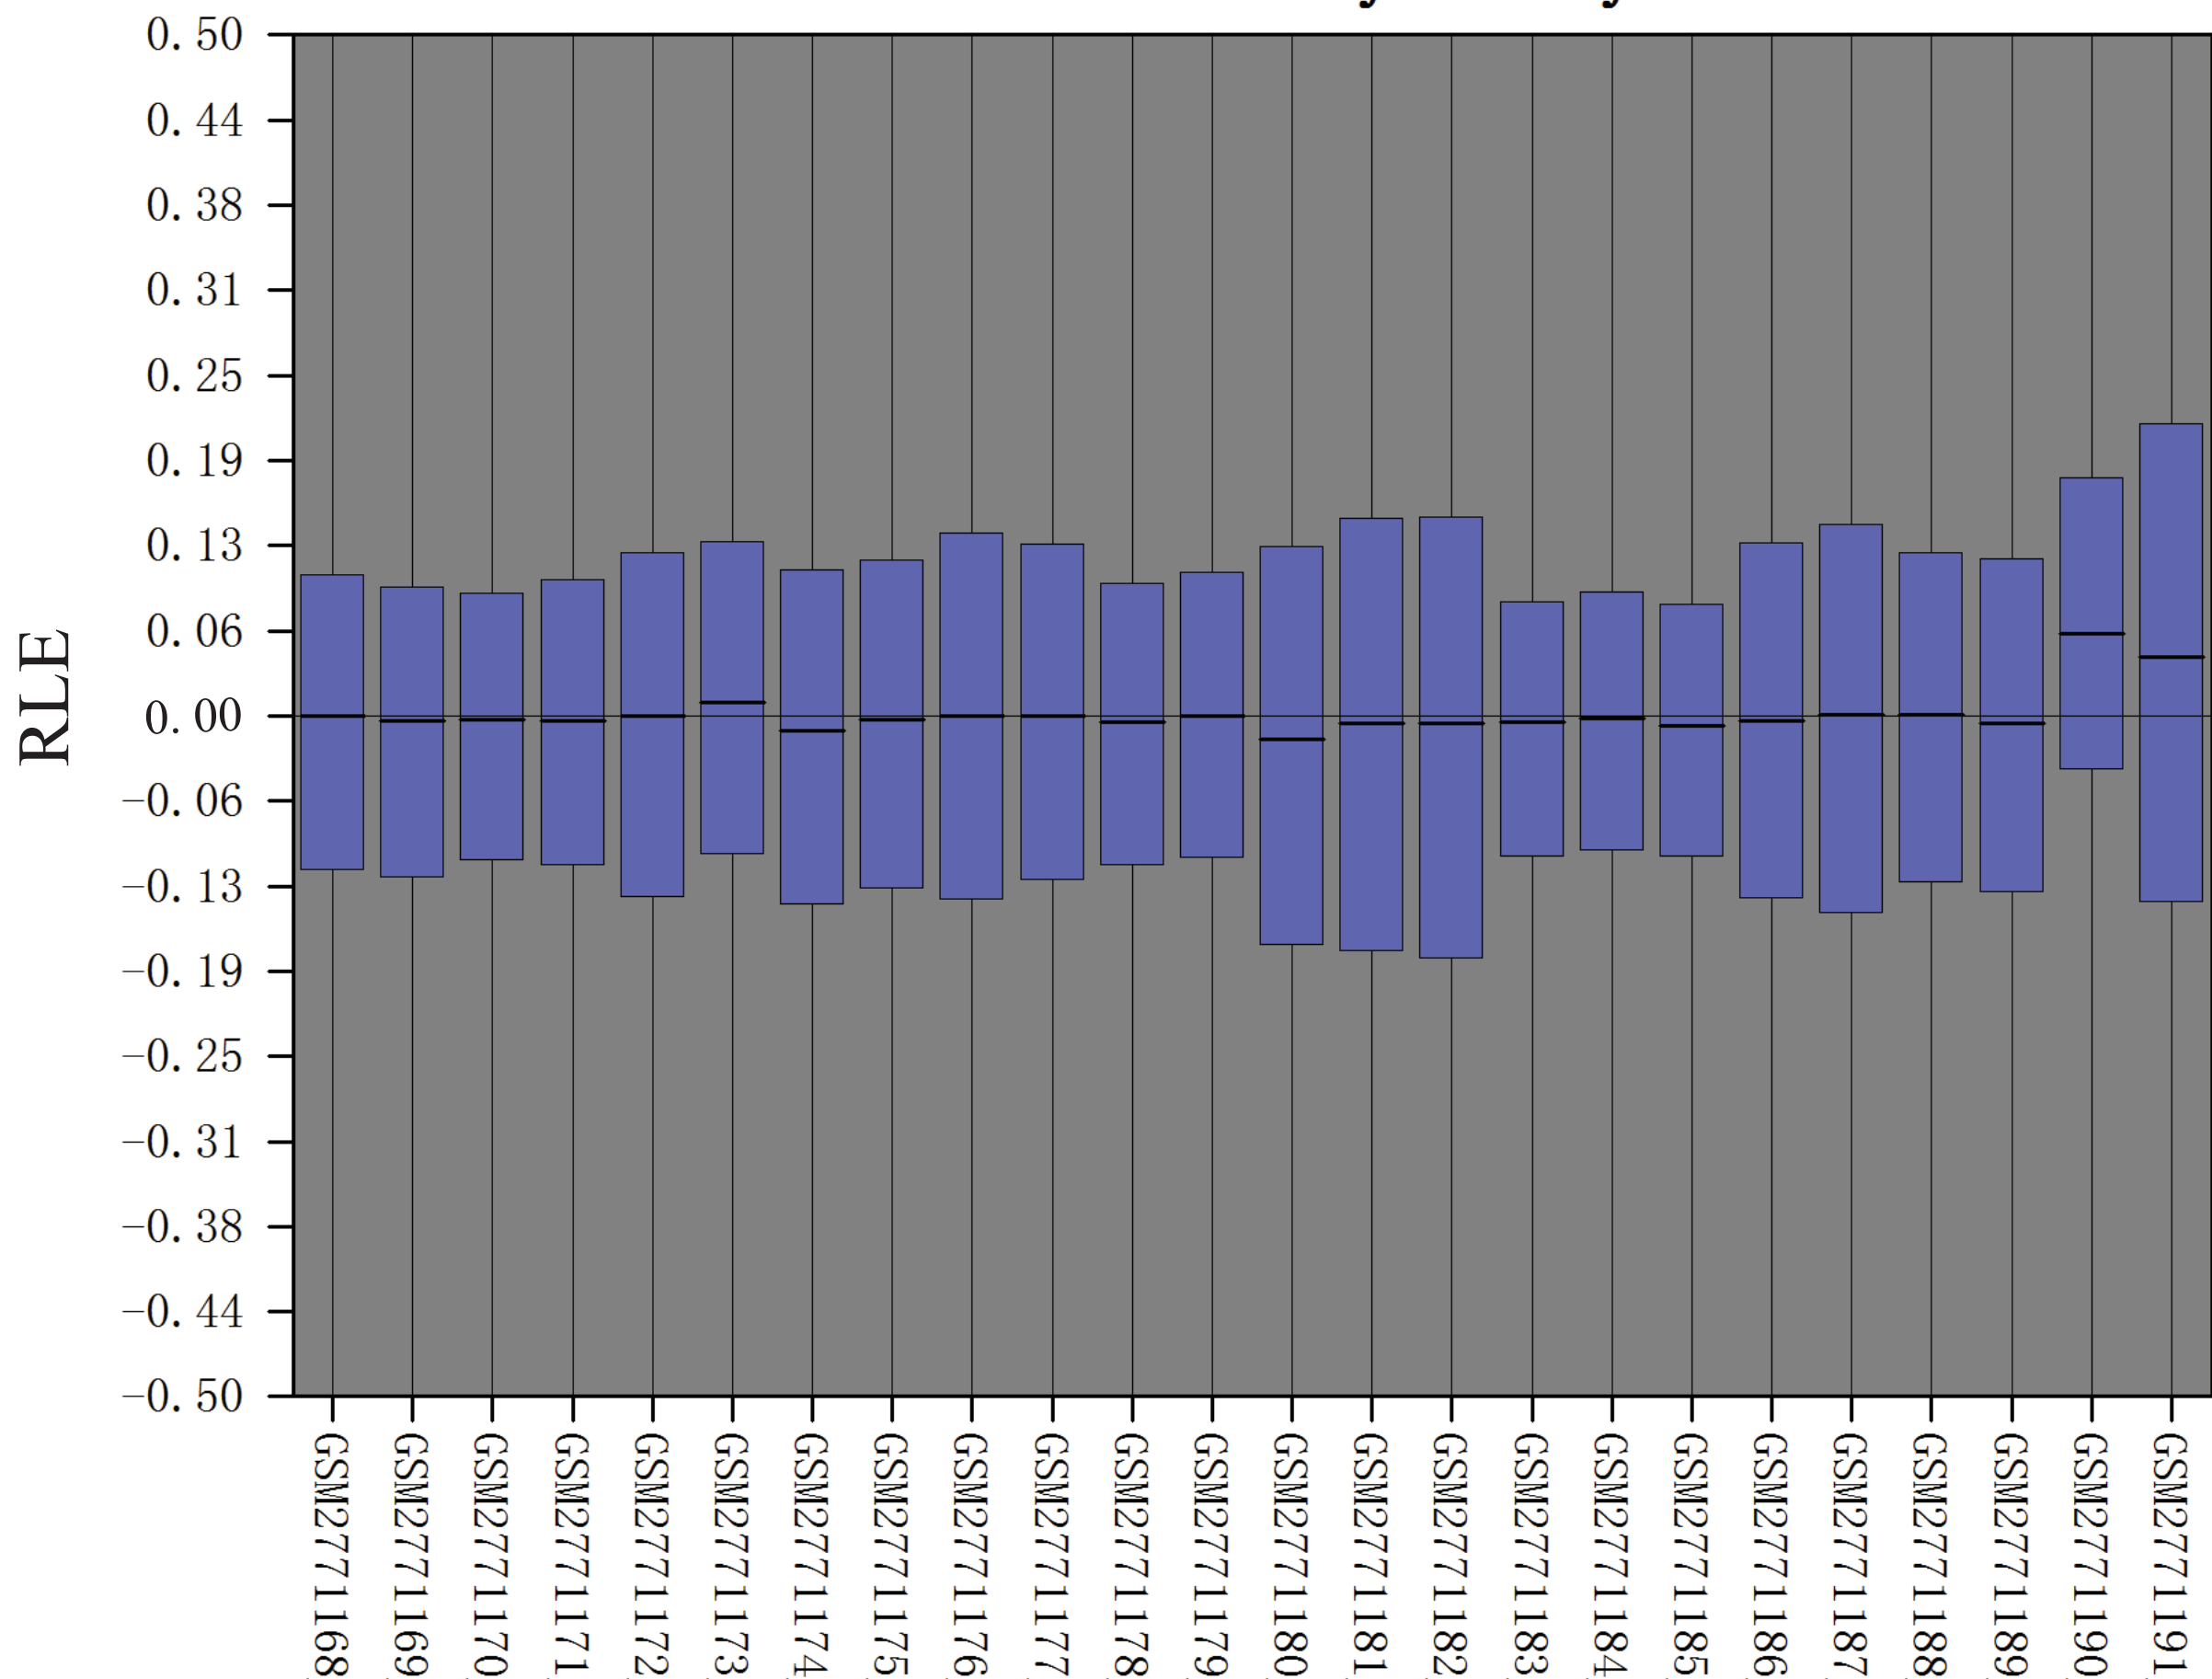

# GSE103430 (seven phytohormones)

## NUSE values by array

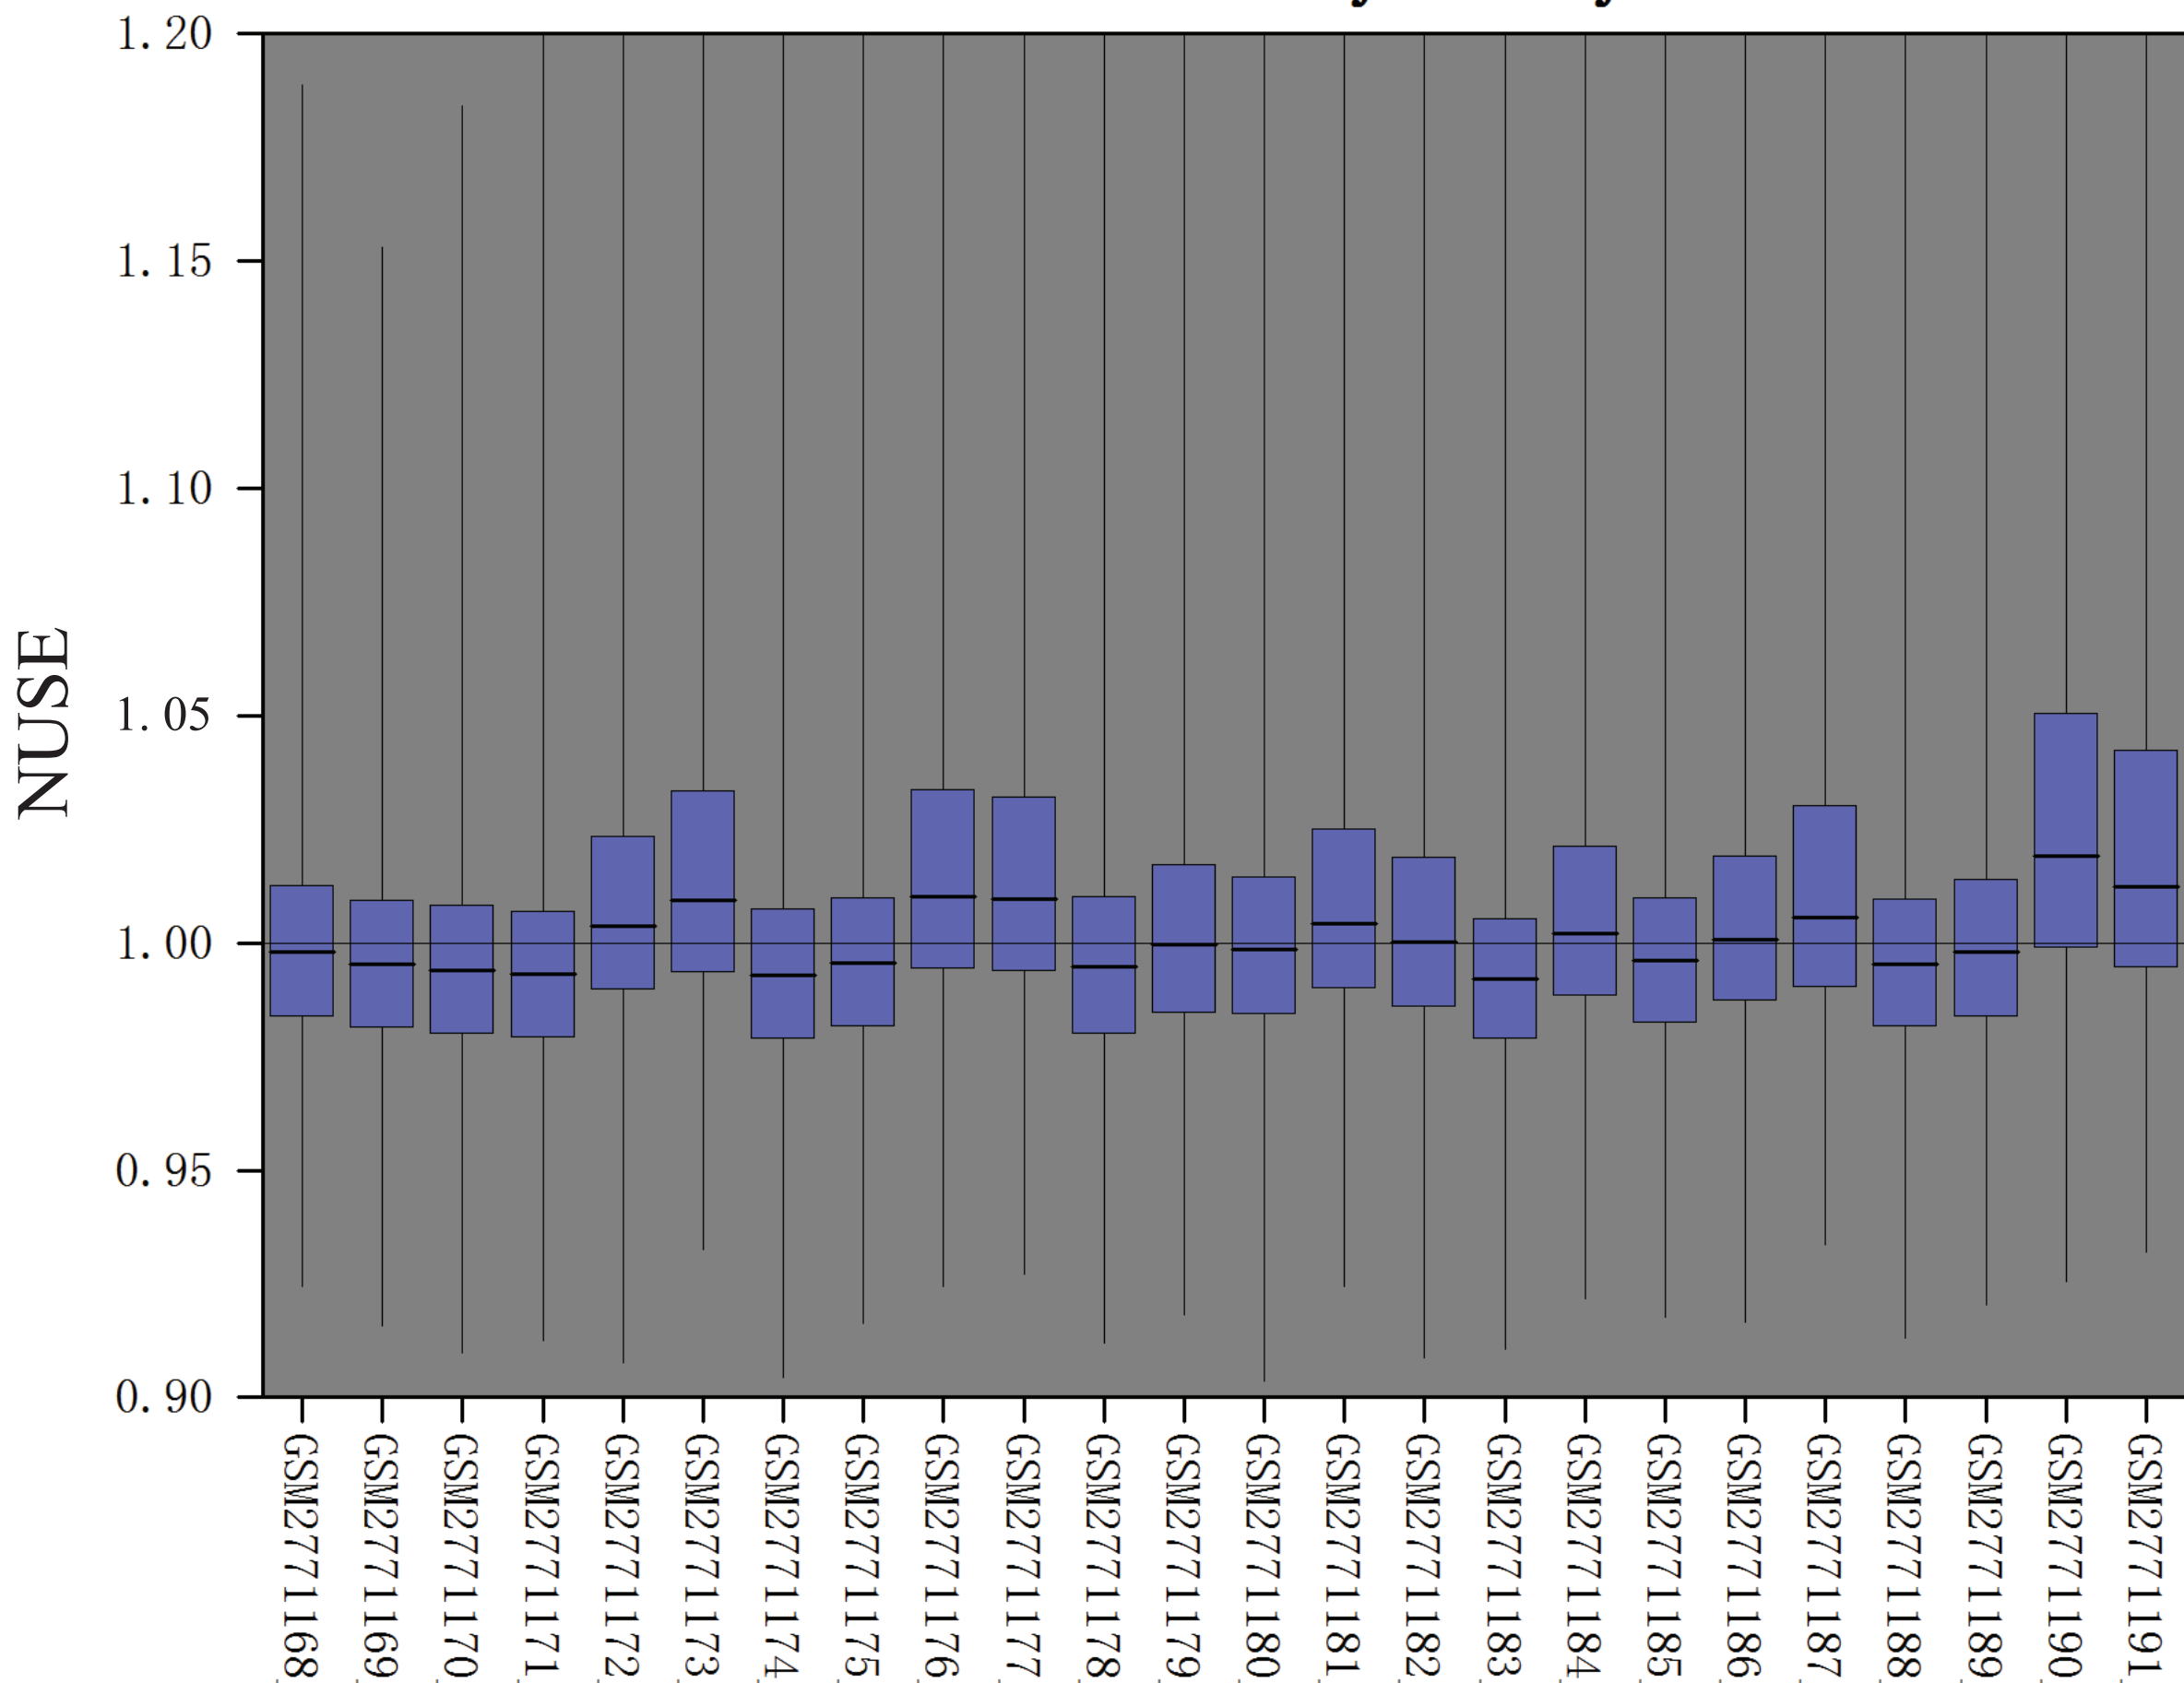

# GSE36283 (Fusarium Head Blight)

## RLE values by array

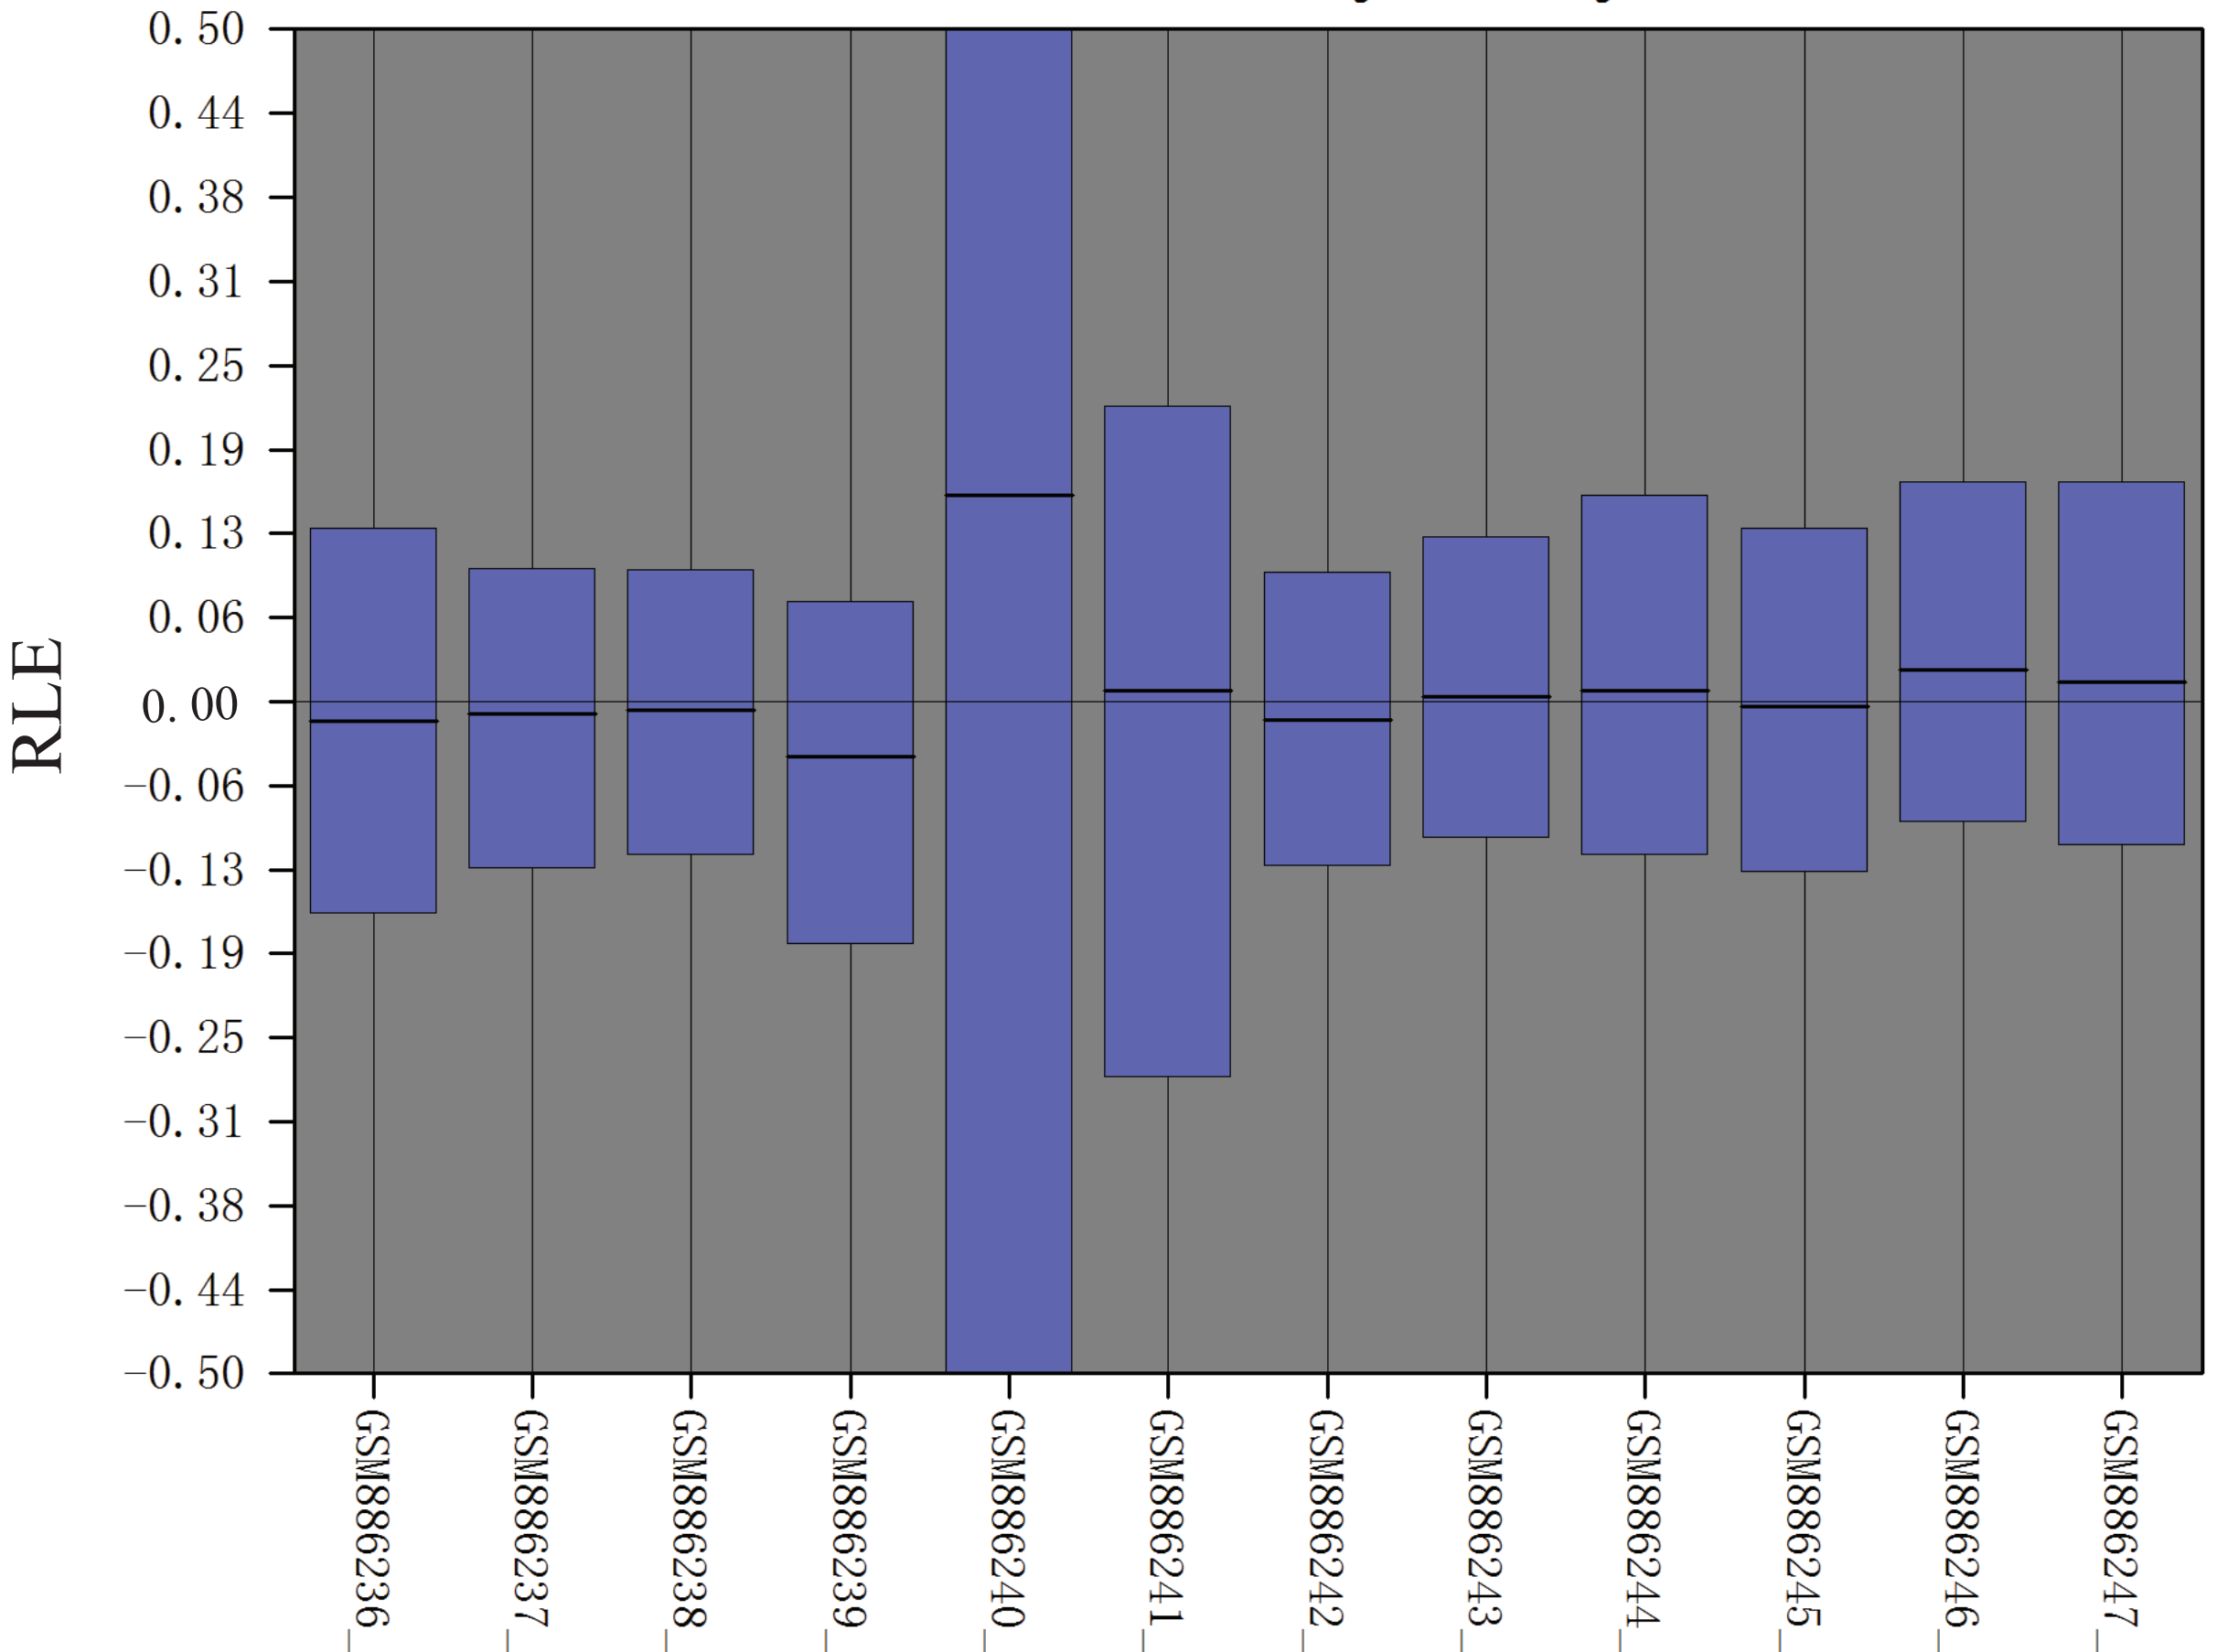

# GSE36283 (Fusarium Head Blight)

## NUSE values by array

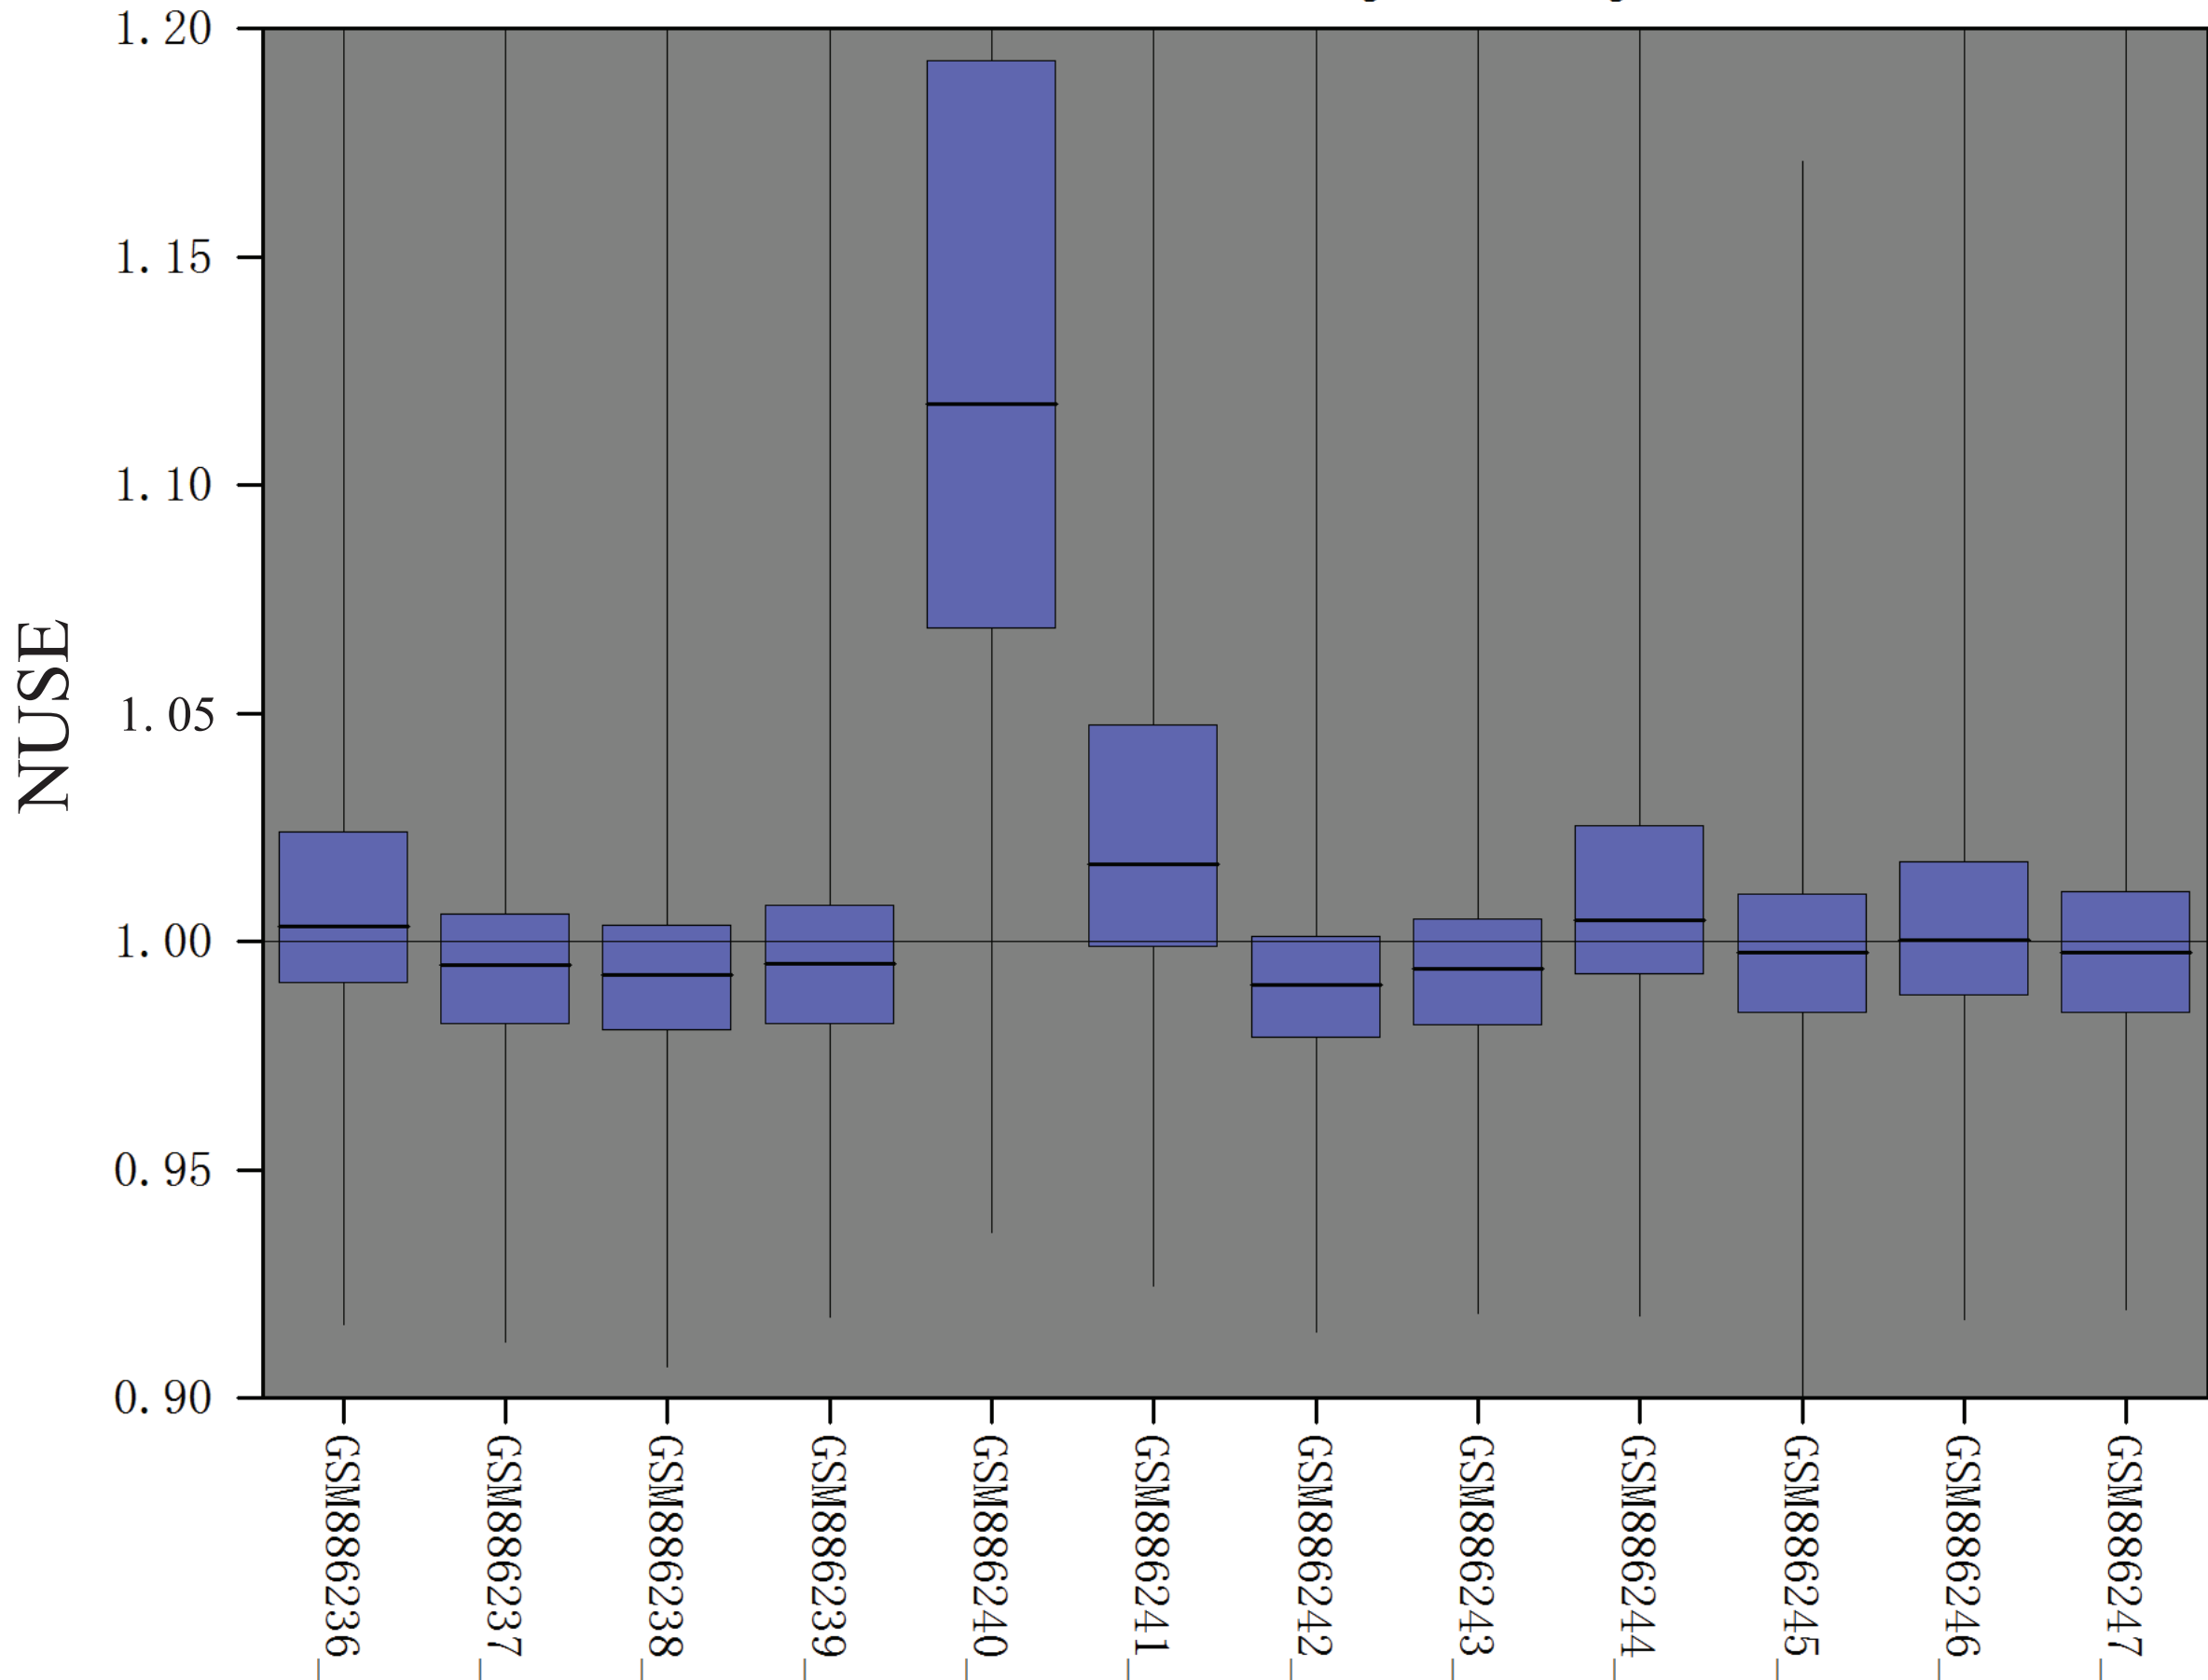

# GSE12936 (powdery mildew)

## RLE values by array

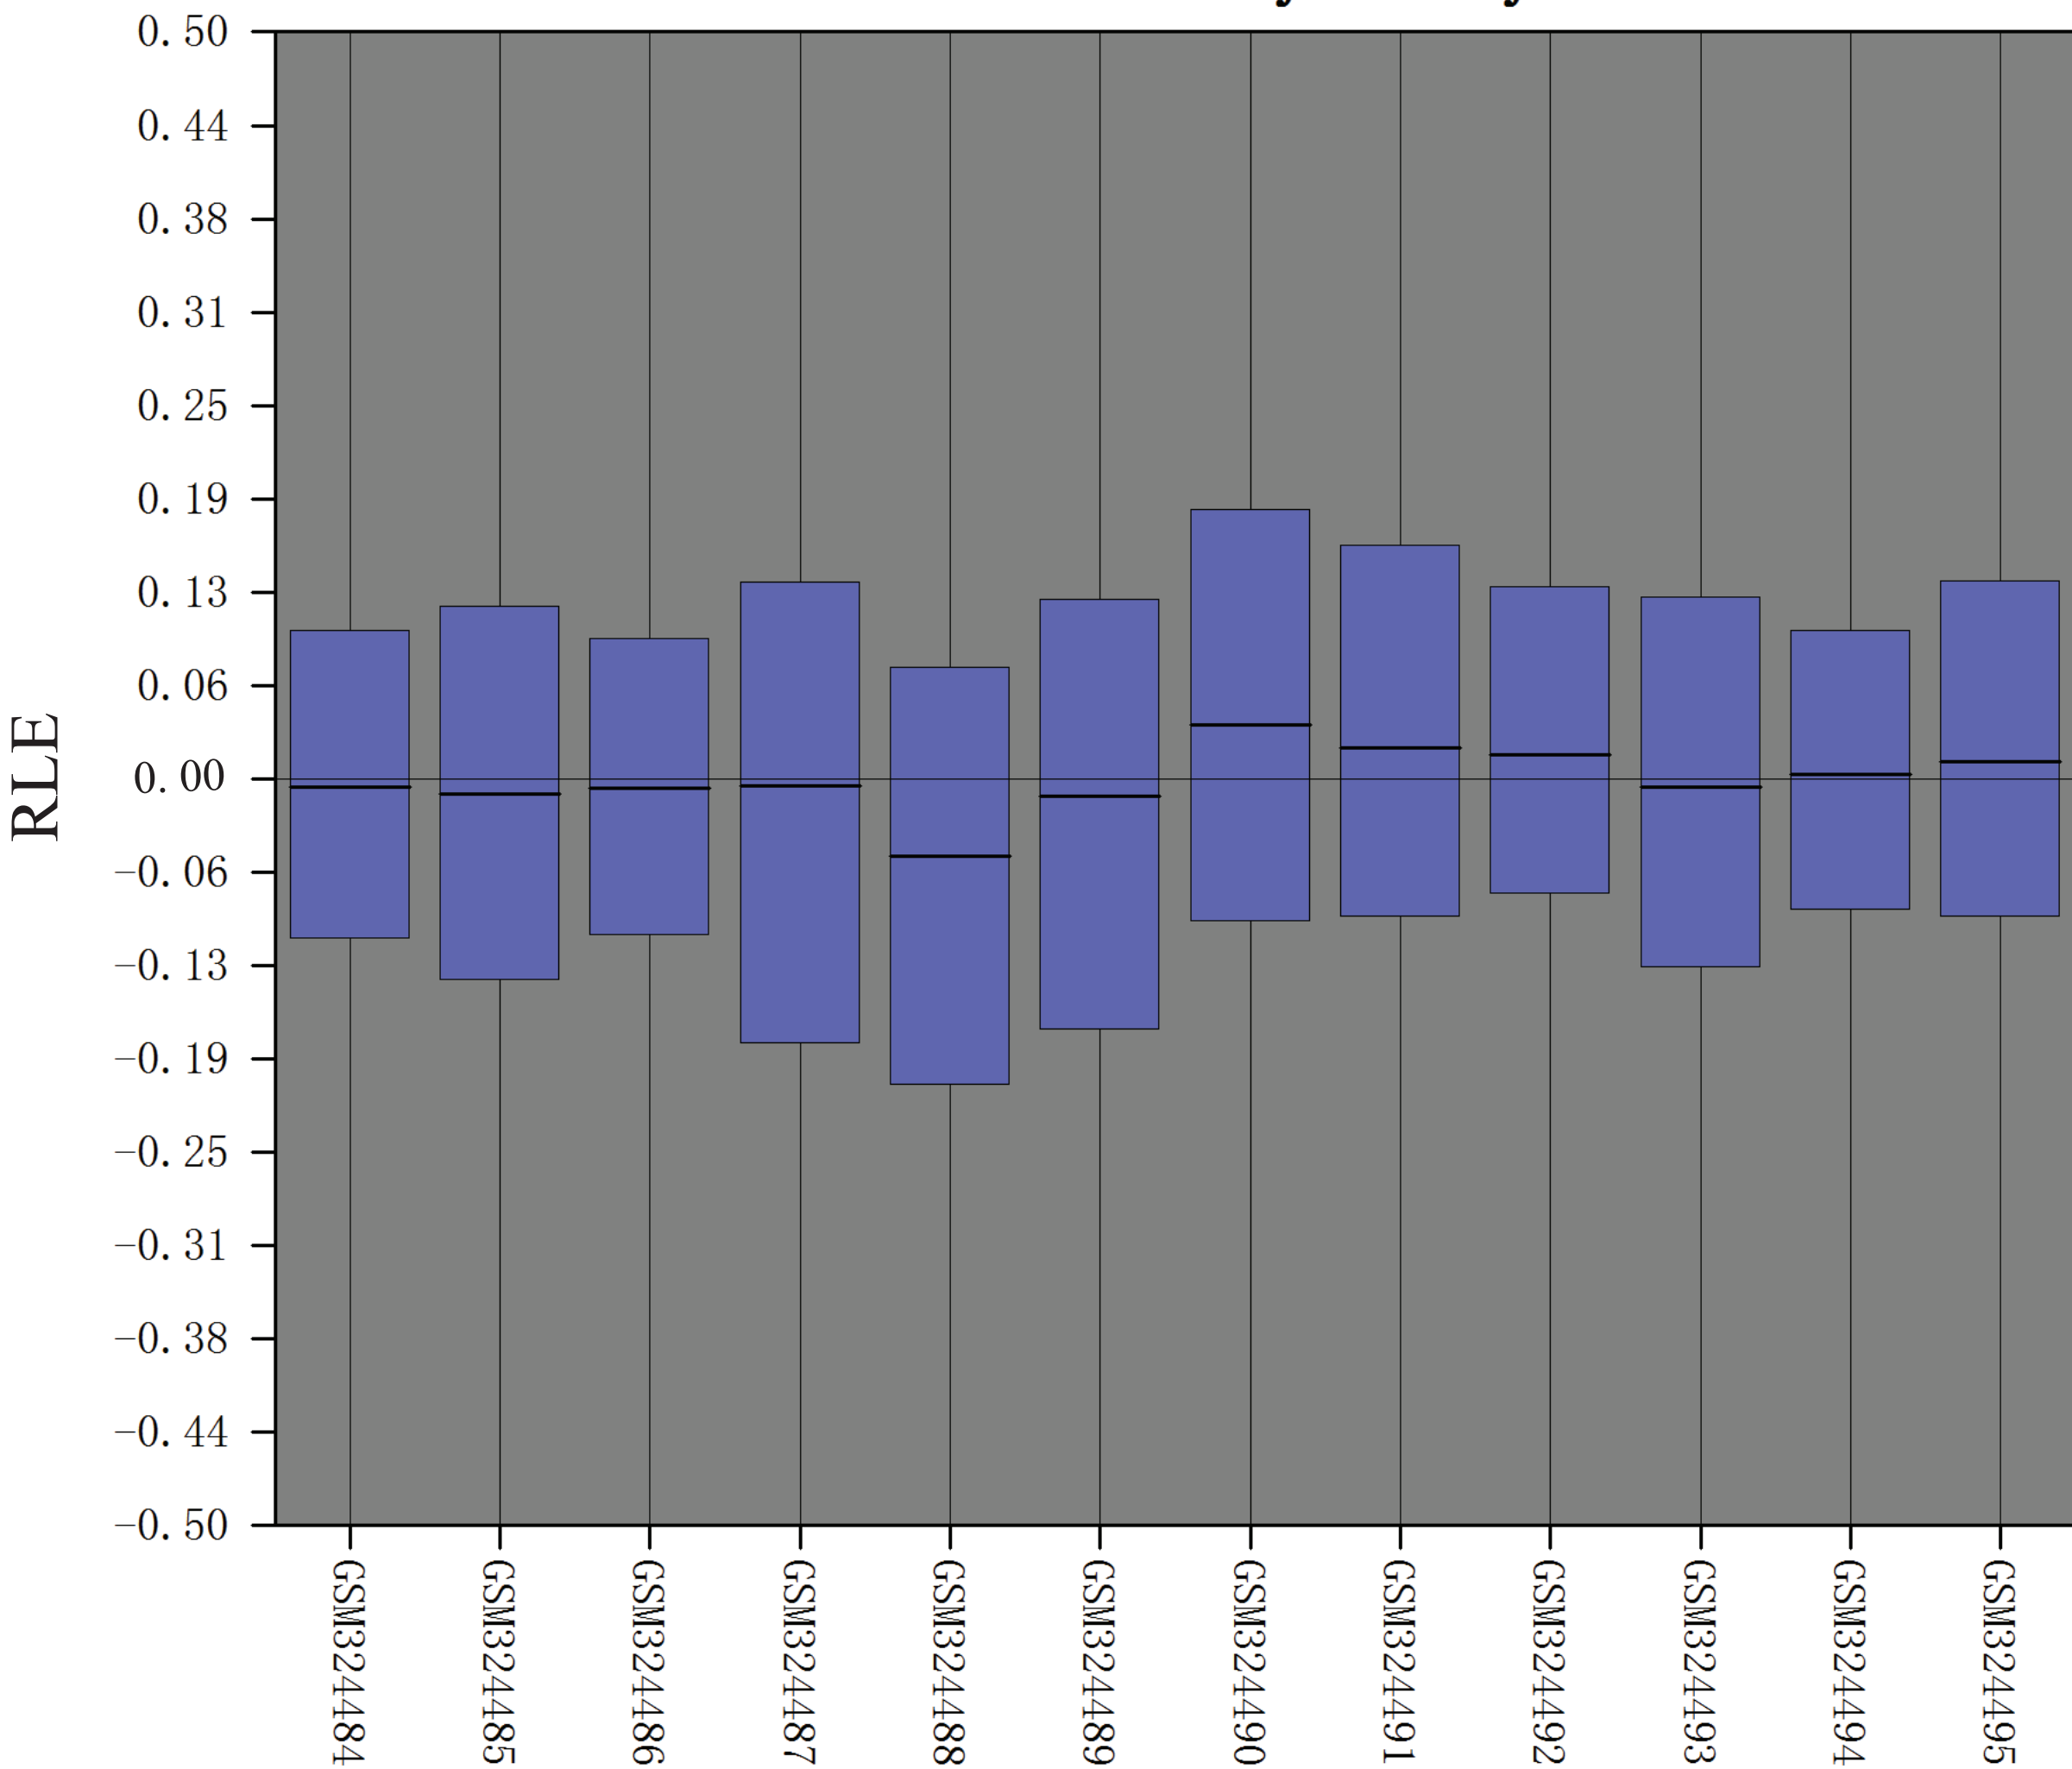

# GSE12936 (powdery mildew)

## NUSE values by array

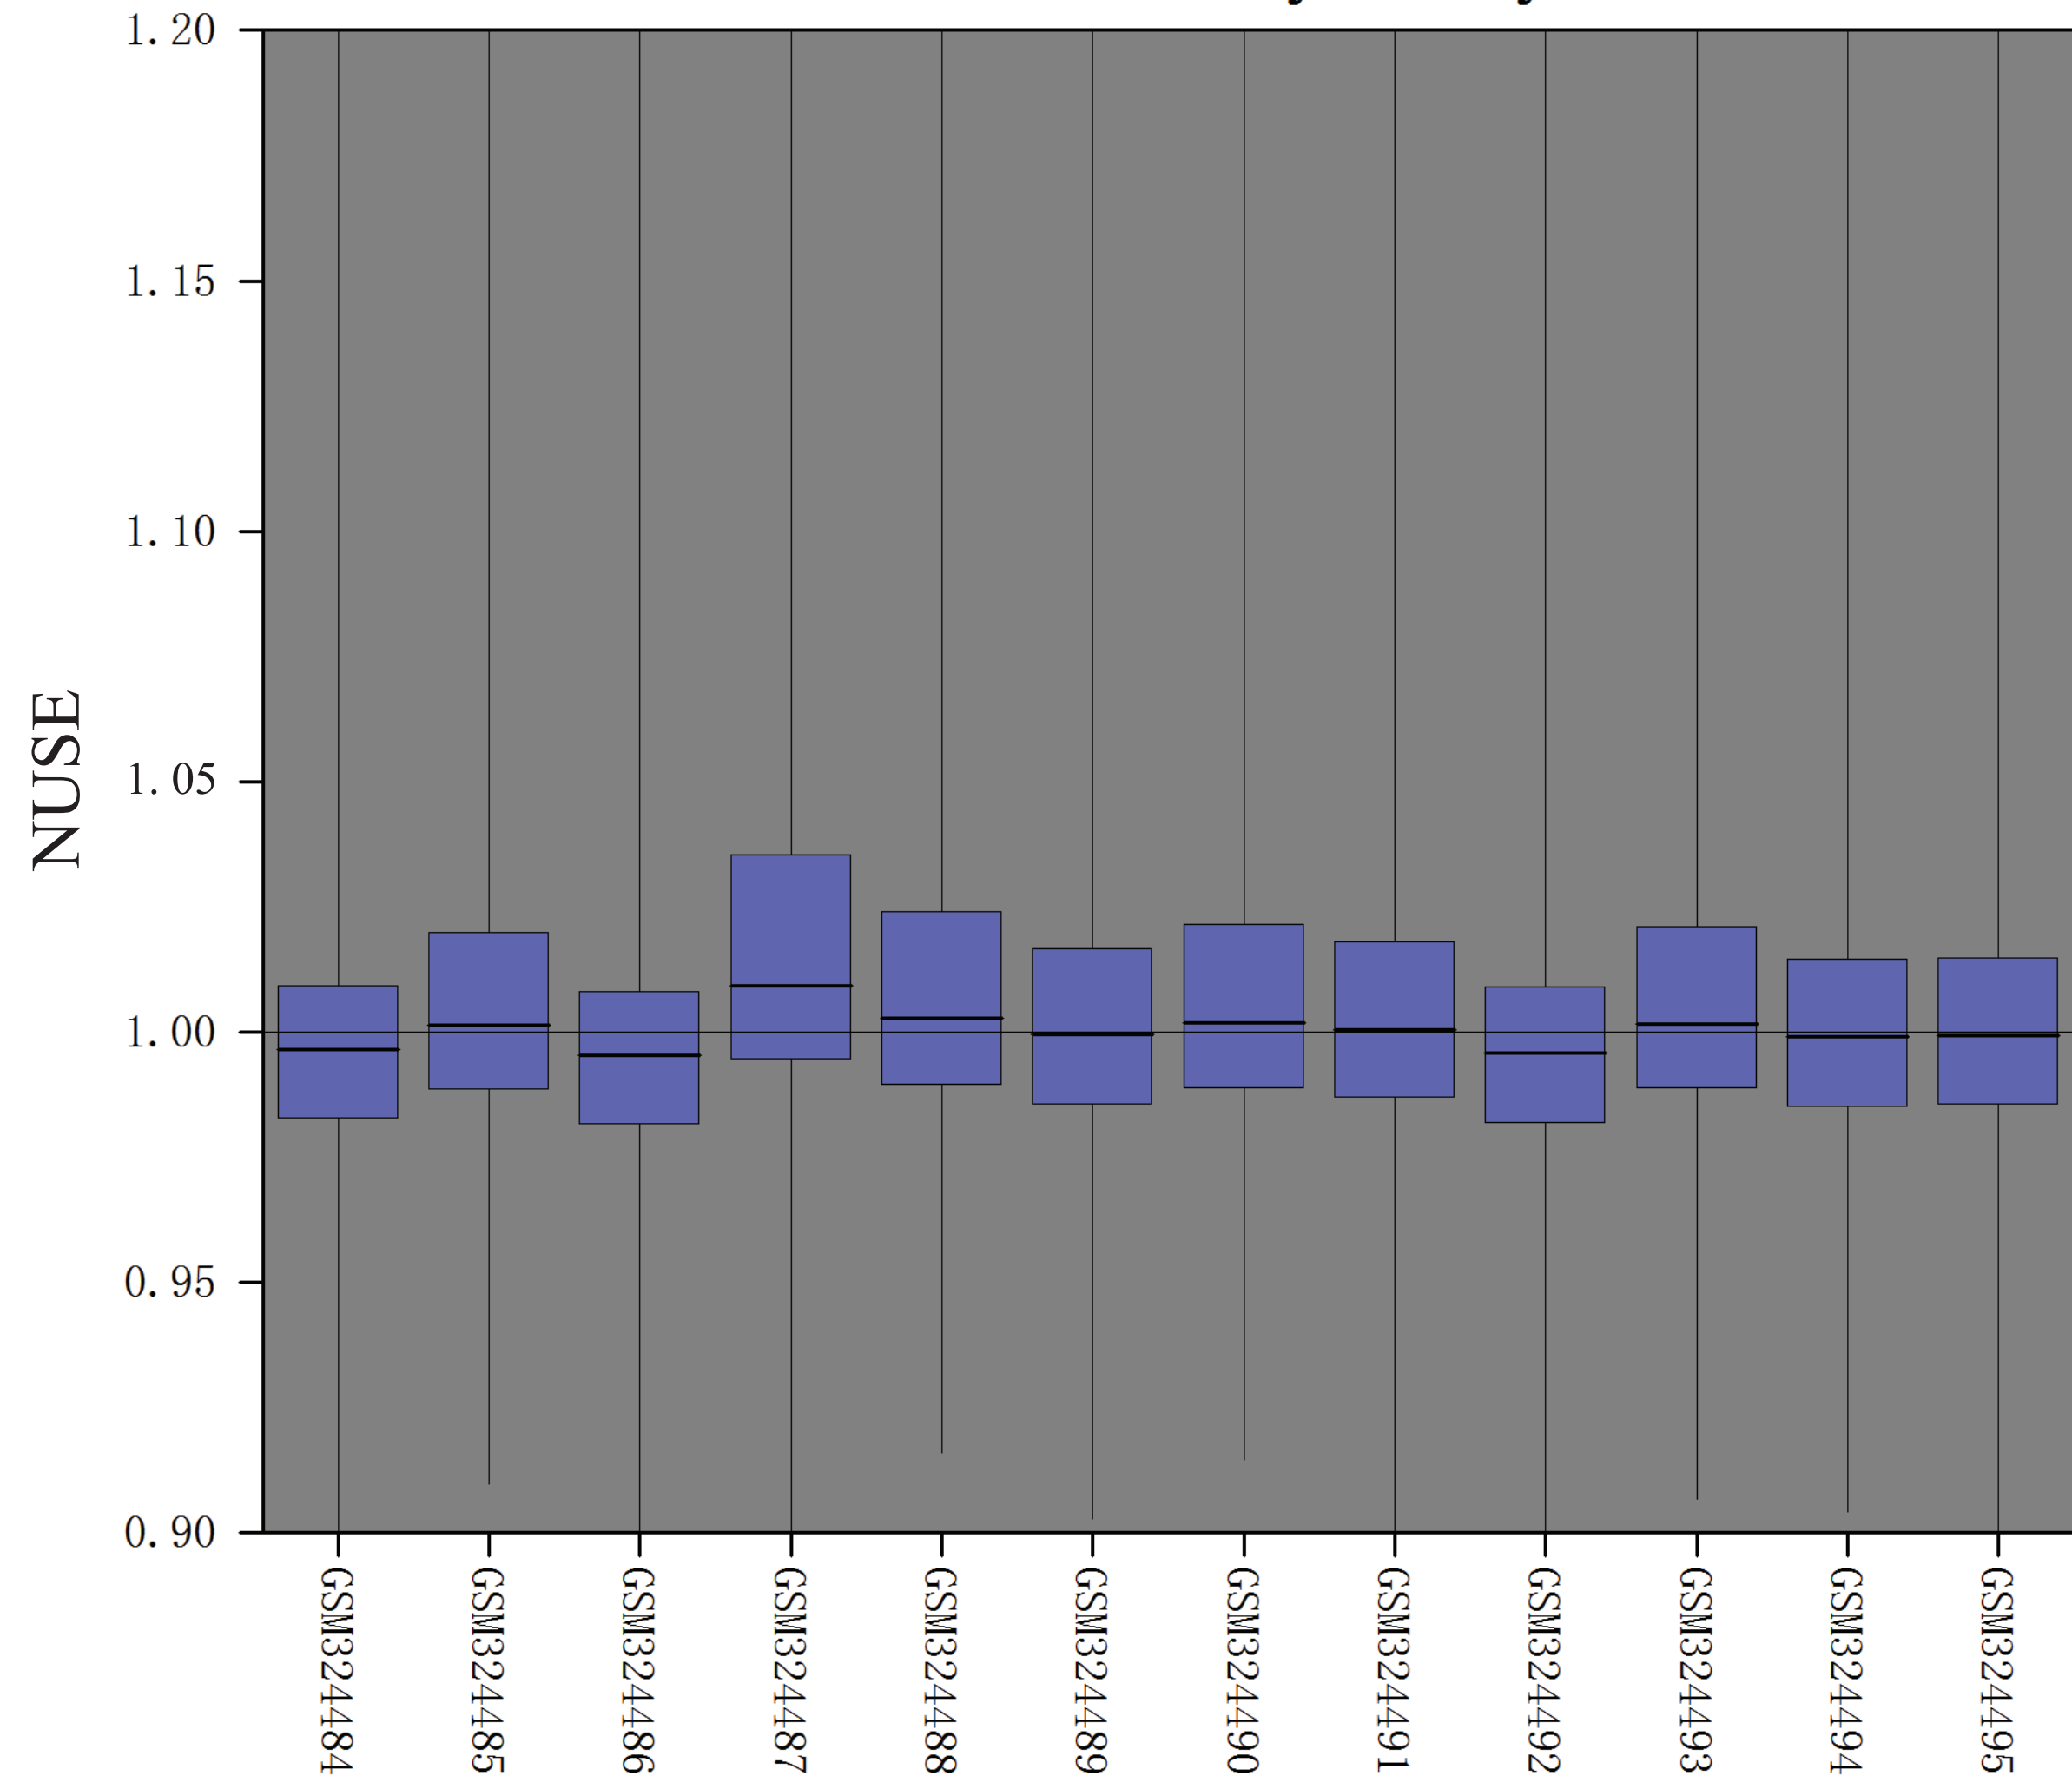



# GSE31760 (blast fungus)

## RLE values by array

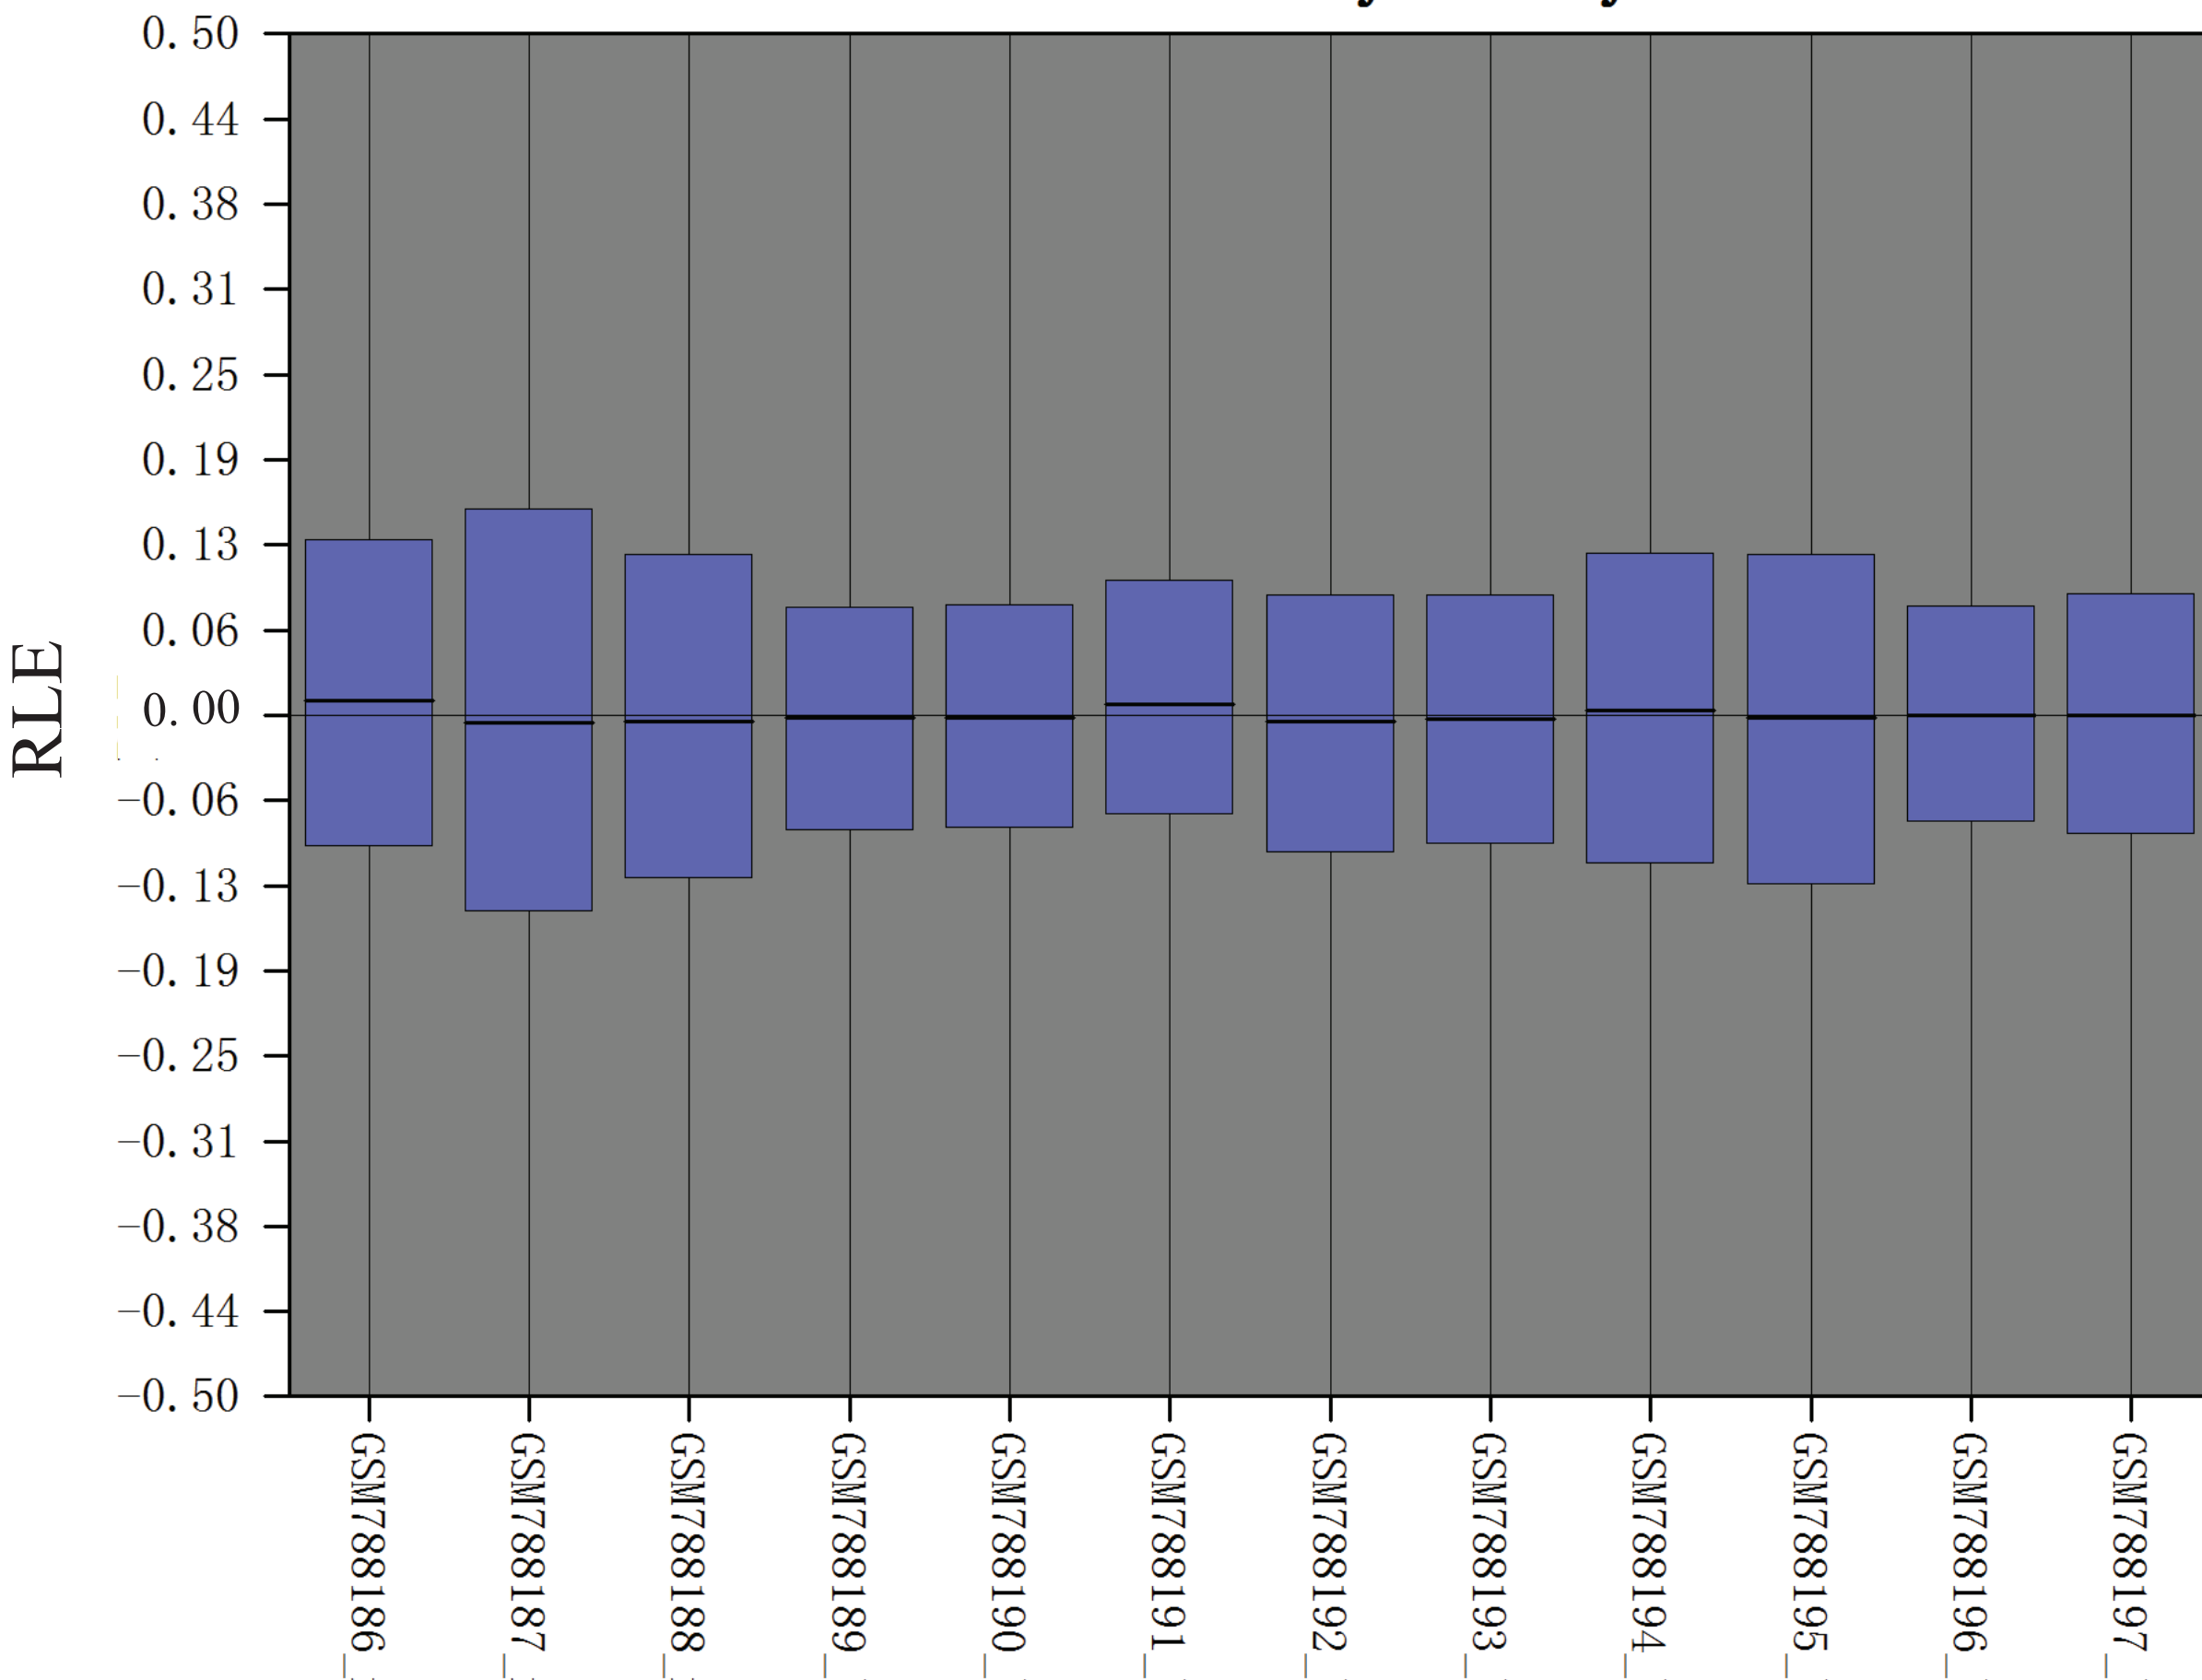

# GSE31760 (blast fungus)

## NUSE values by array

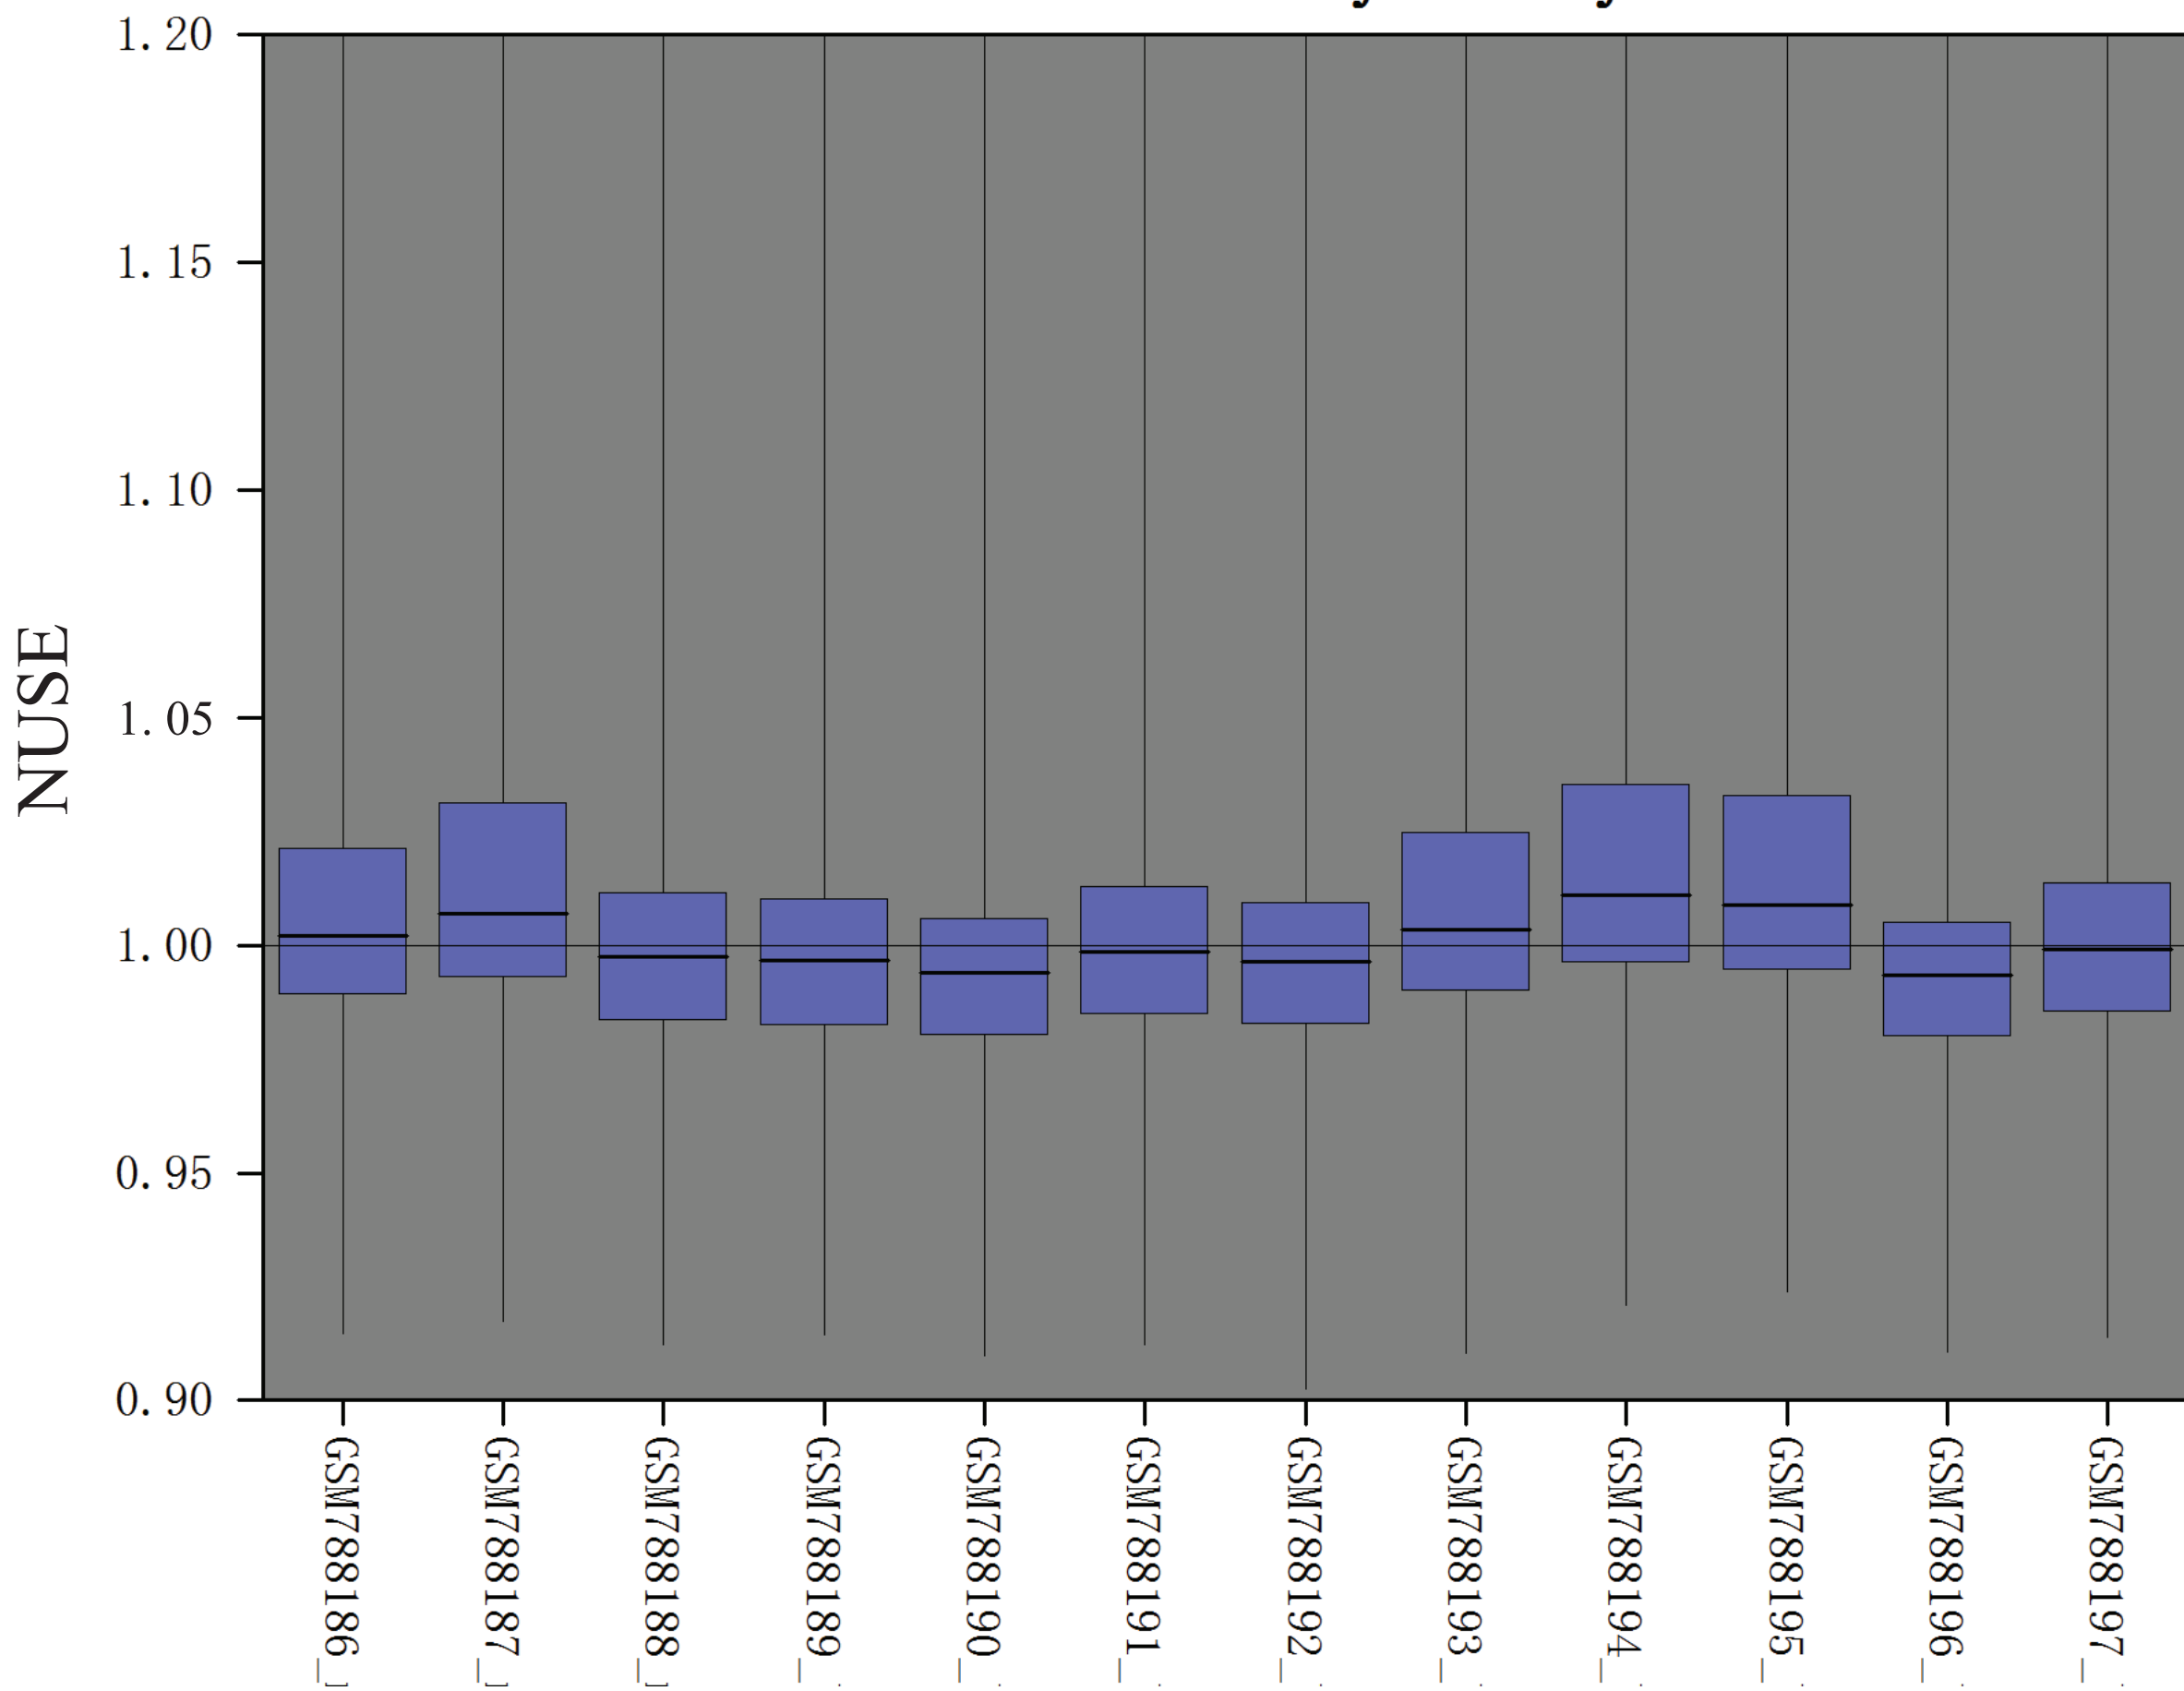

# GSE34445 (Hessian fly larval)

## RLE values by array

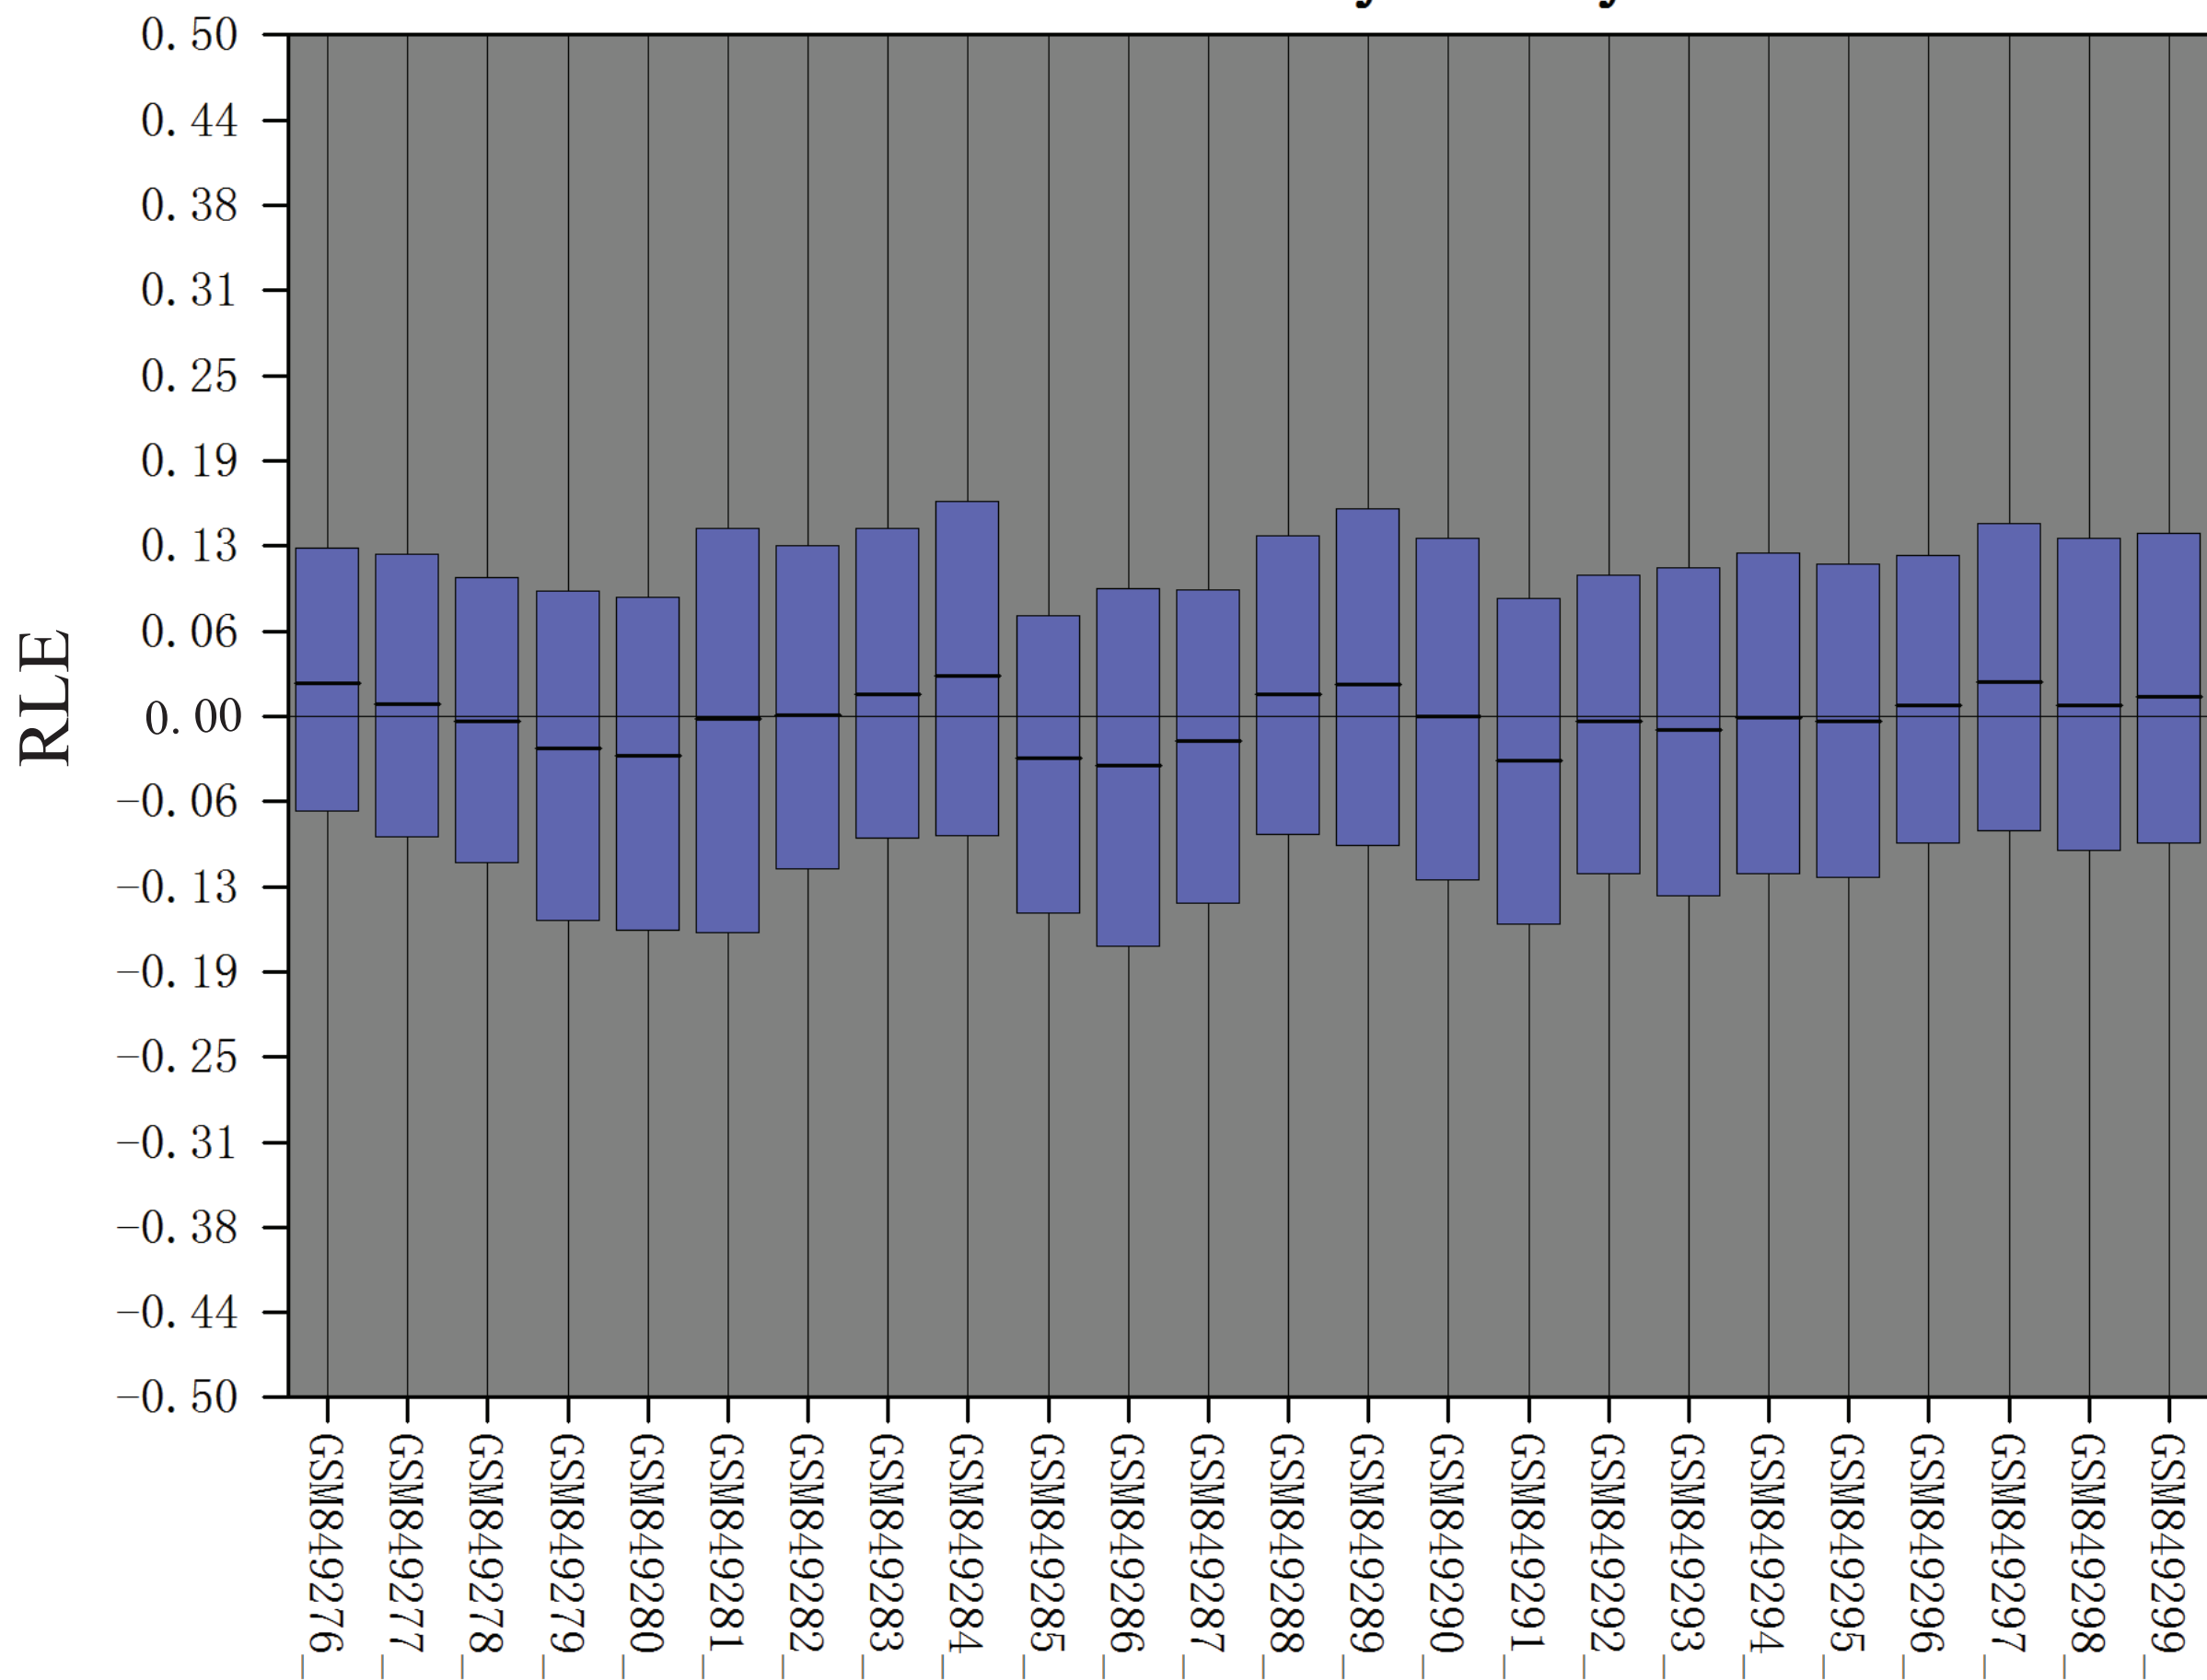

# GSE34445 (Hessian fly larval)

## NUSE values by array

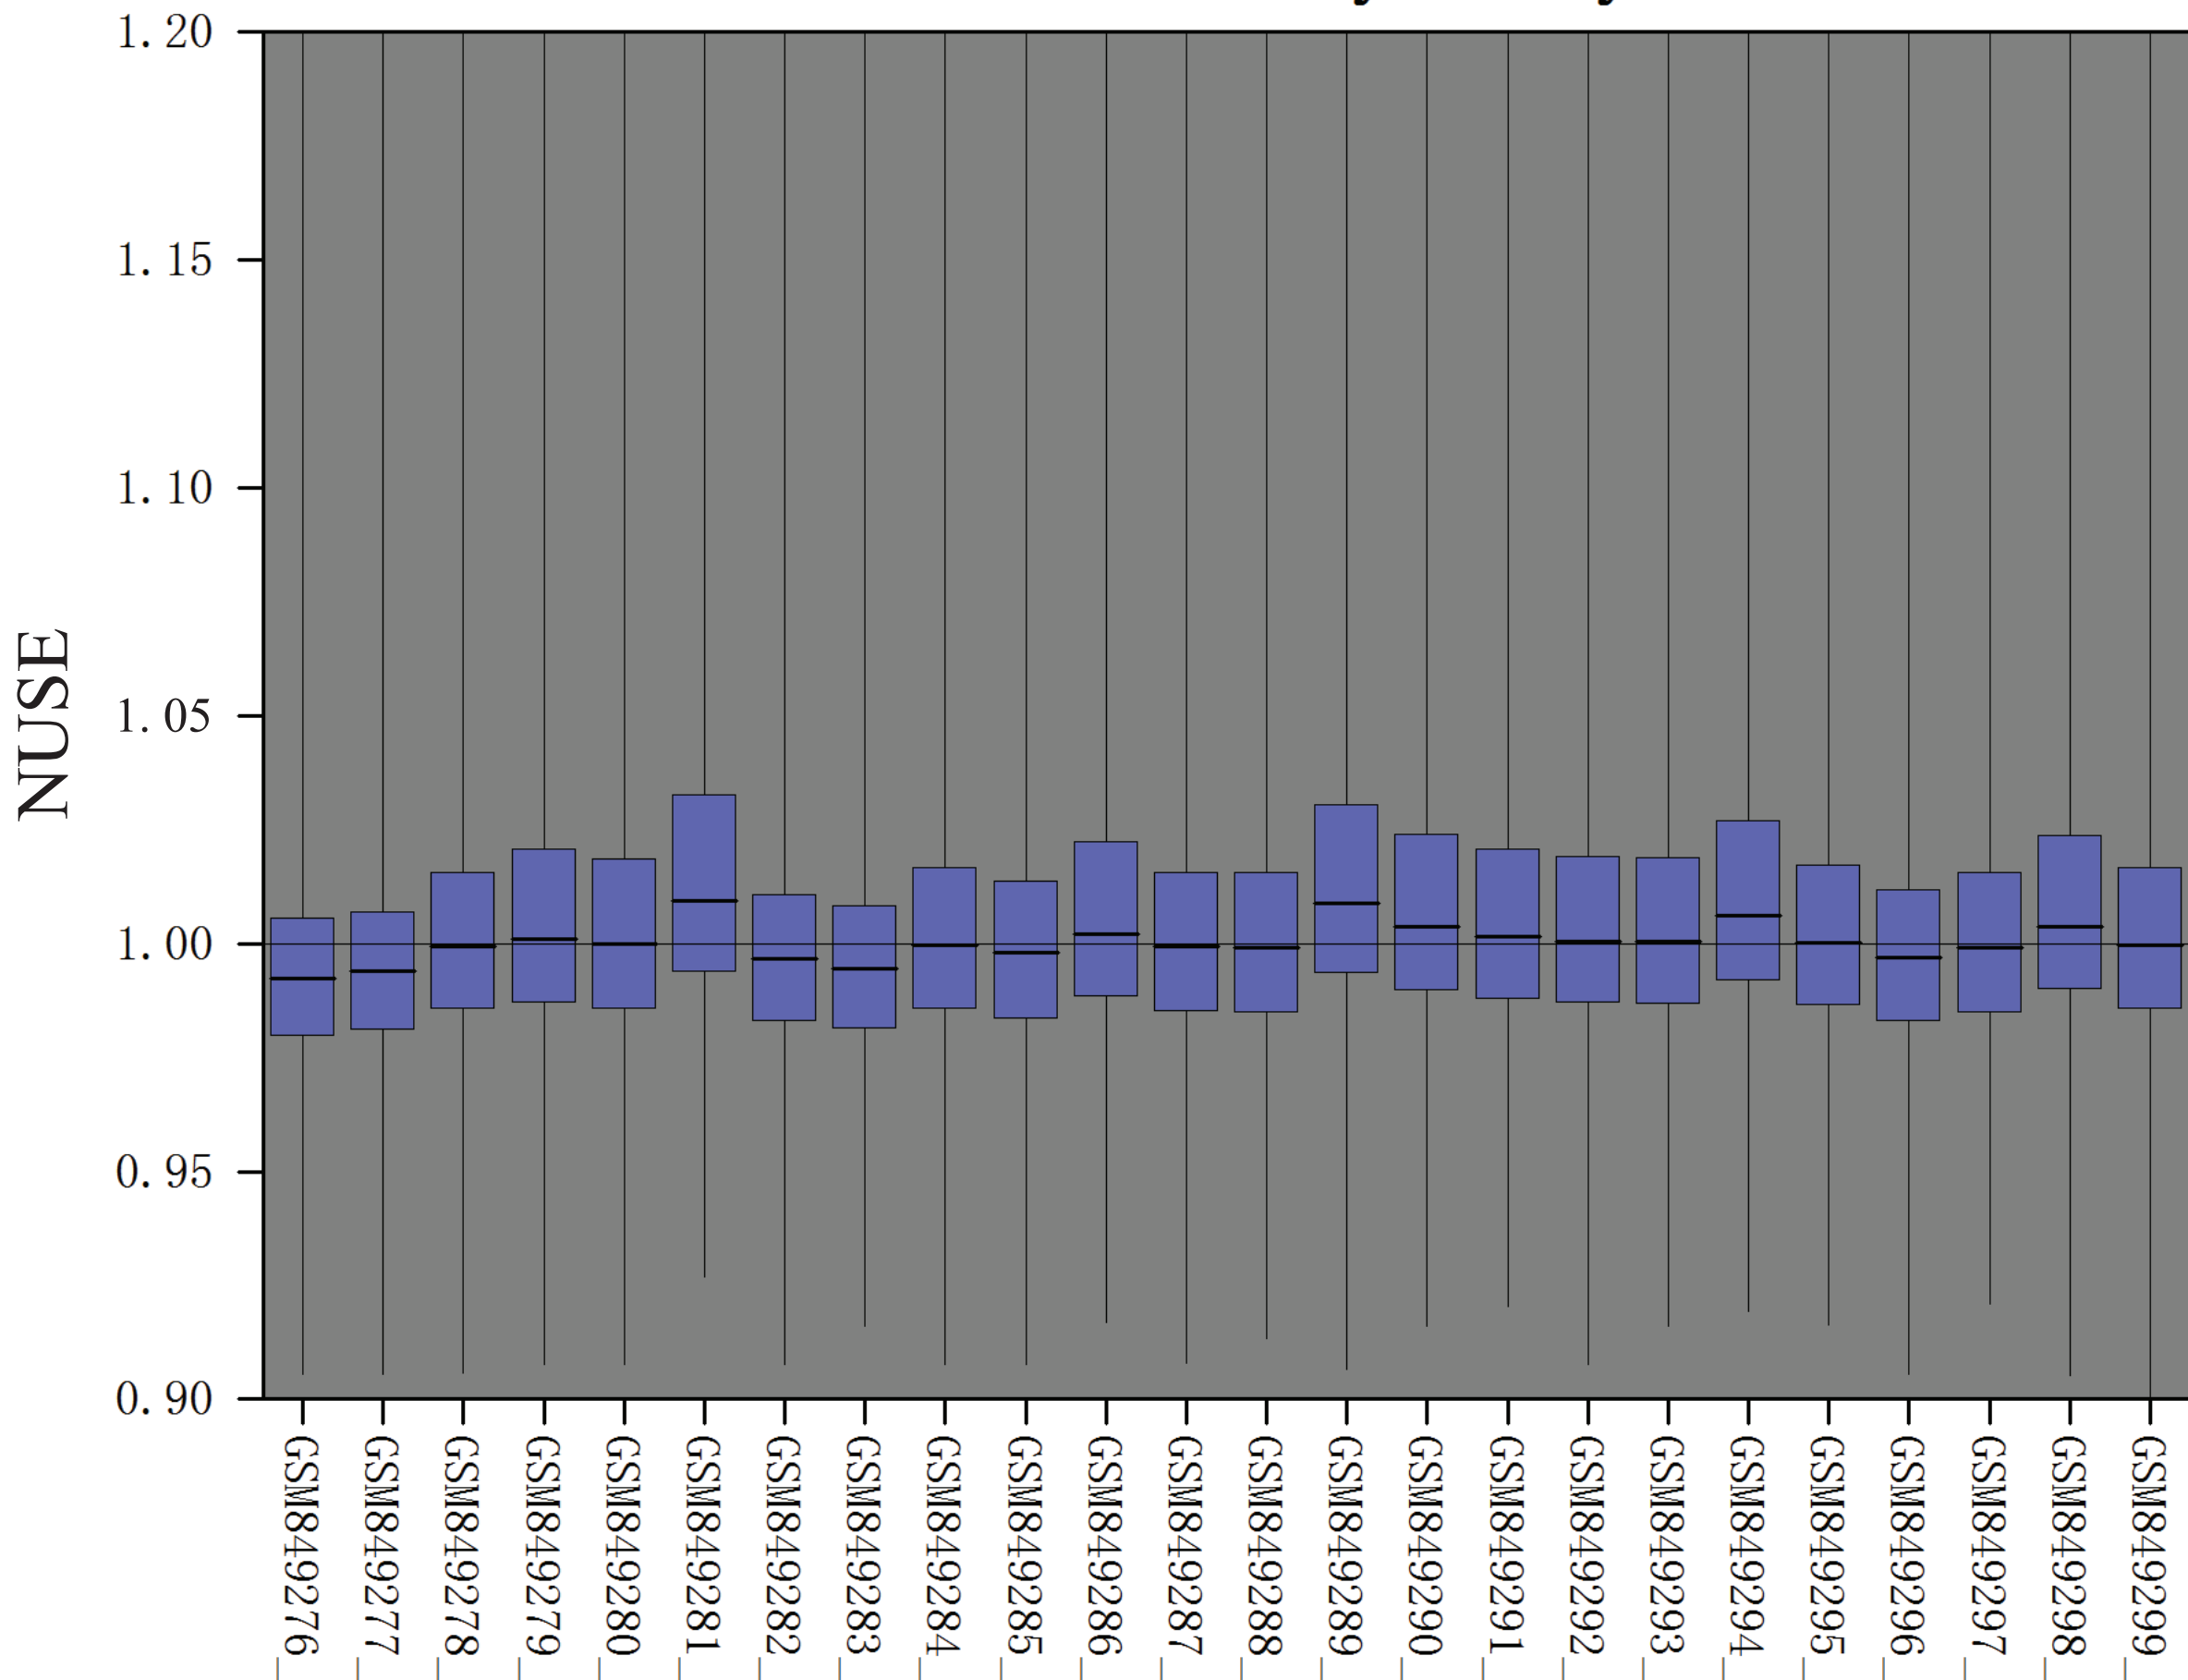

# GSE47479 (earthworms and *Gaeumannomyces graminis*)

## RLE values by array

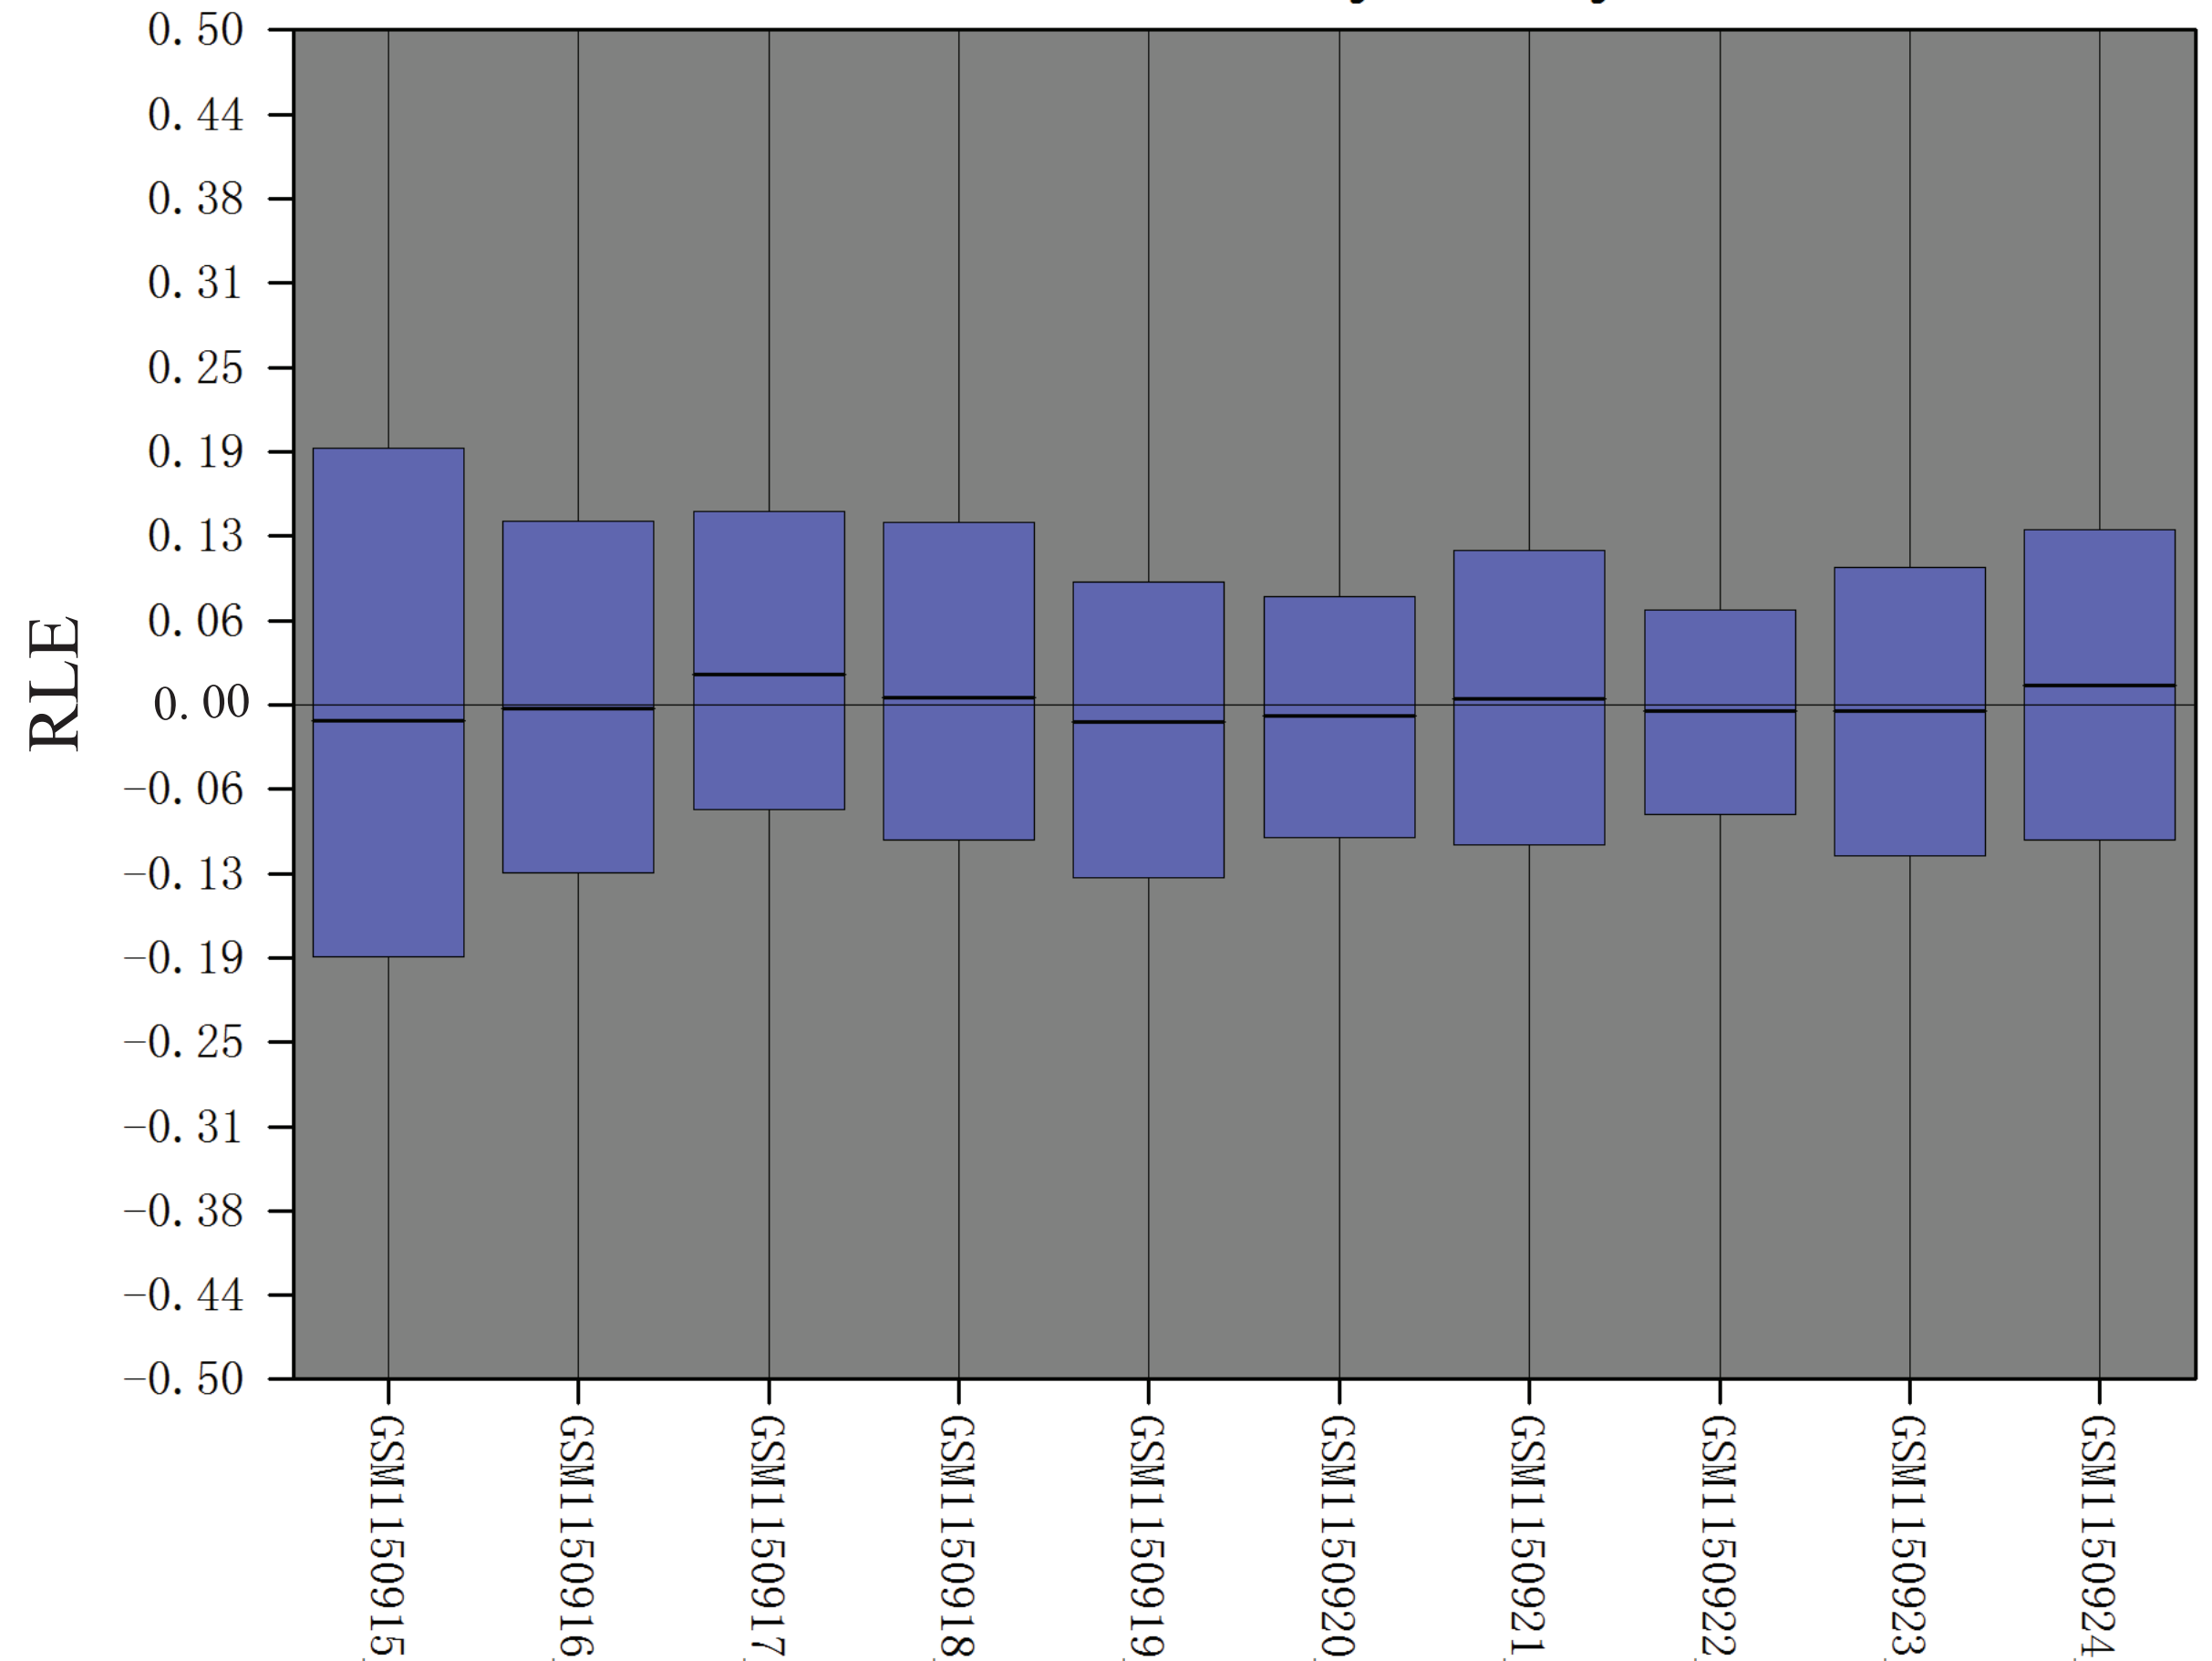

# GSE47479 (earthworms and *Gaeumannomyces graminis*)

## NUSE values by array

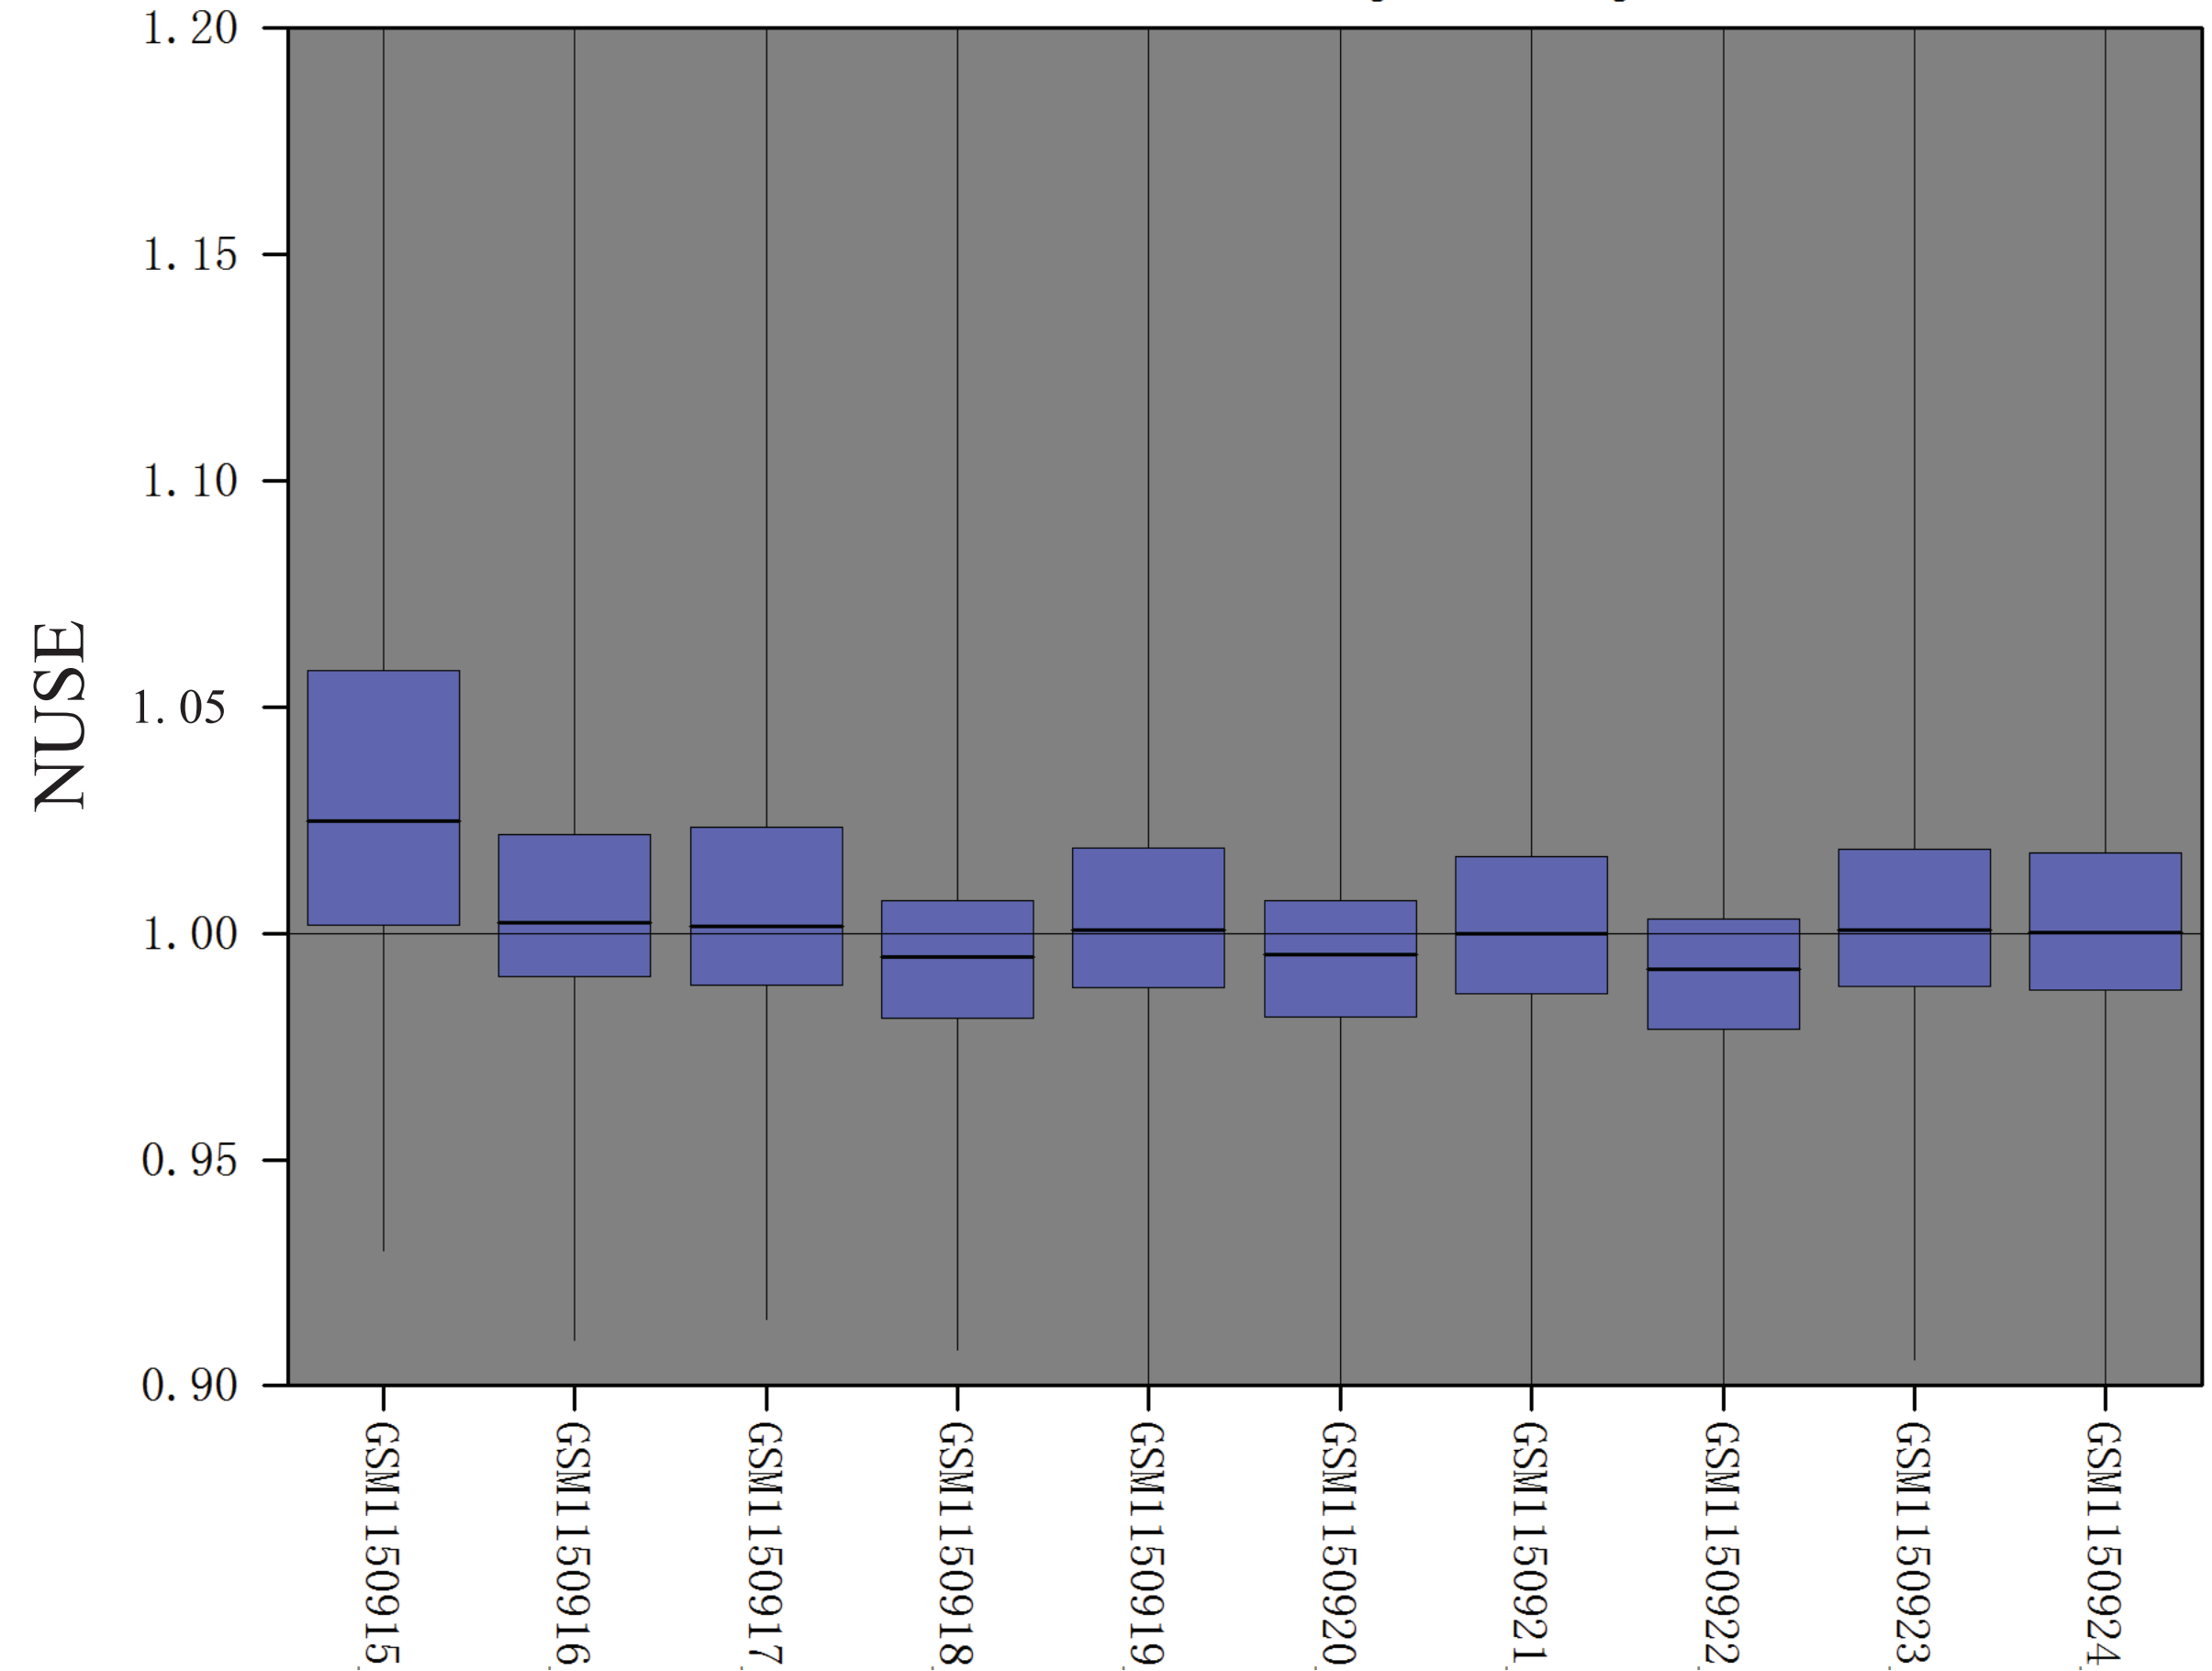

Supplement: 12864_2019_6006_MOESM5_ESM.pdf [file 12864_2019_6006_MOESM5_ESM.pdf]
