# Supplementary material for: Genome-wide and evolutionary analysis of the class III peroxidase gene family in wheat and Aegilops tauschii reveals that some members are involved in stress responses
Source: PubMed Central journal article supplement (PMC6704529; doi:10.1186/s12864-019-6006-5), 2019-08-22
Supplement: 12864_2019_6006_MOESM3_ESM.pdf [file 12864_2019_6006_MOESM3_ESM.pdf]

# Class III peroxidase I subfamily exon-intron and prx domain diagram (part 1)

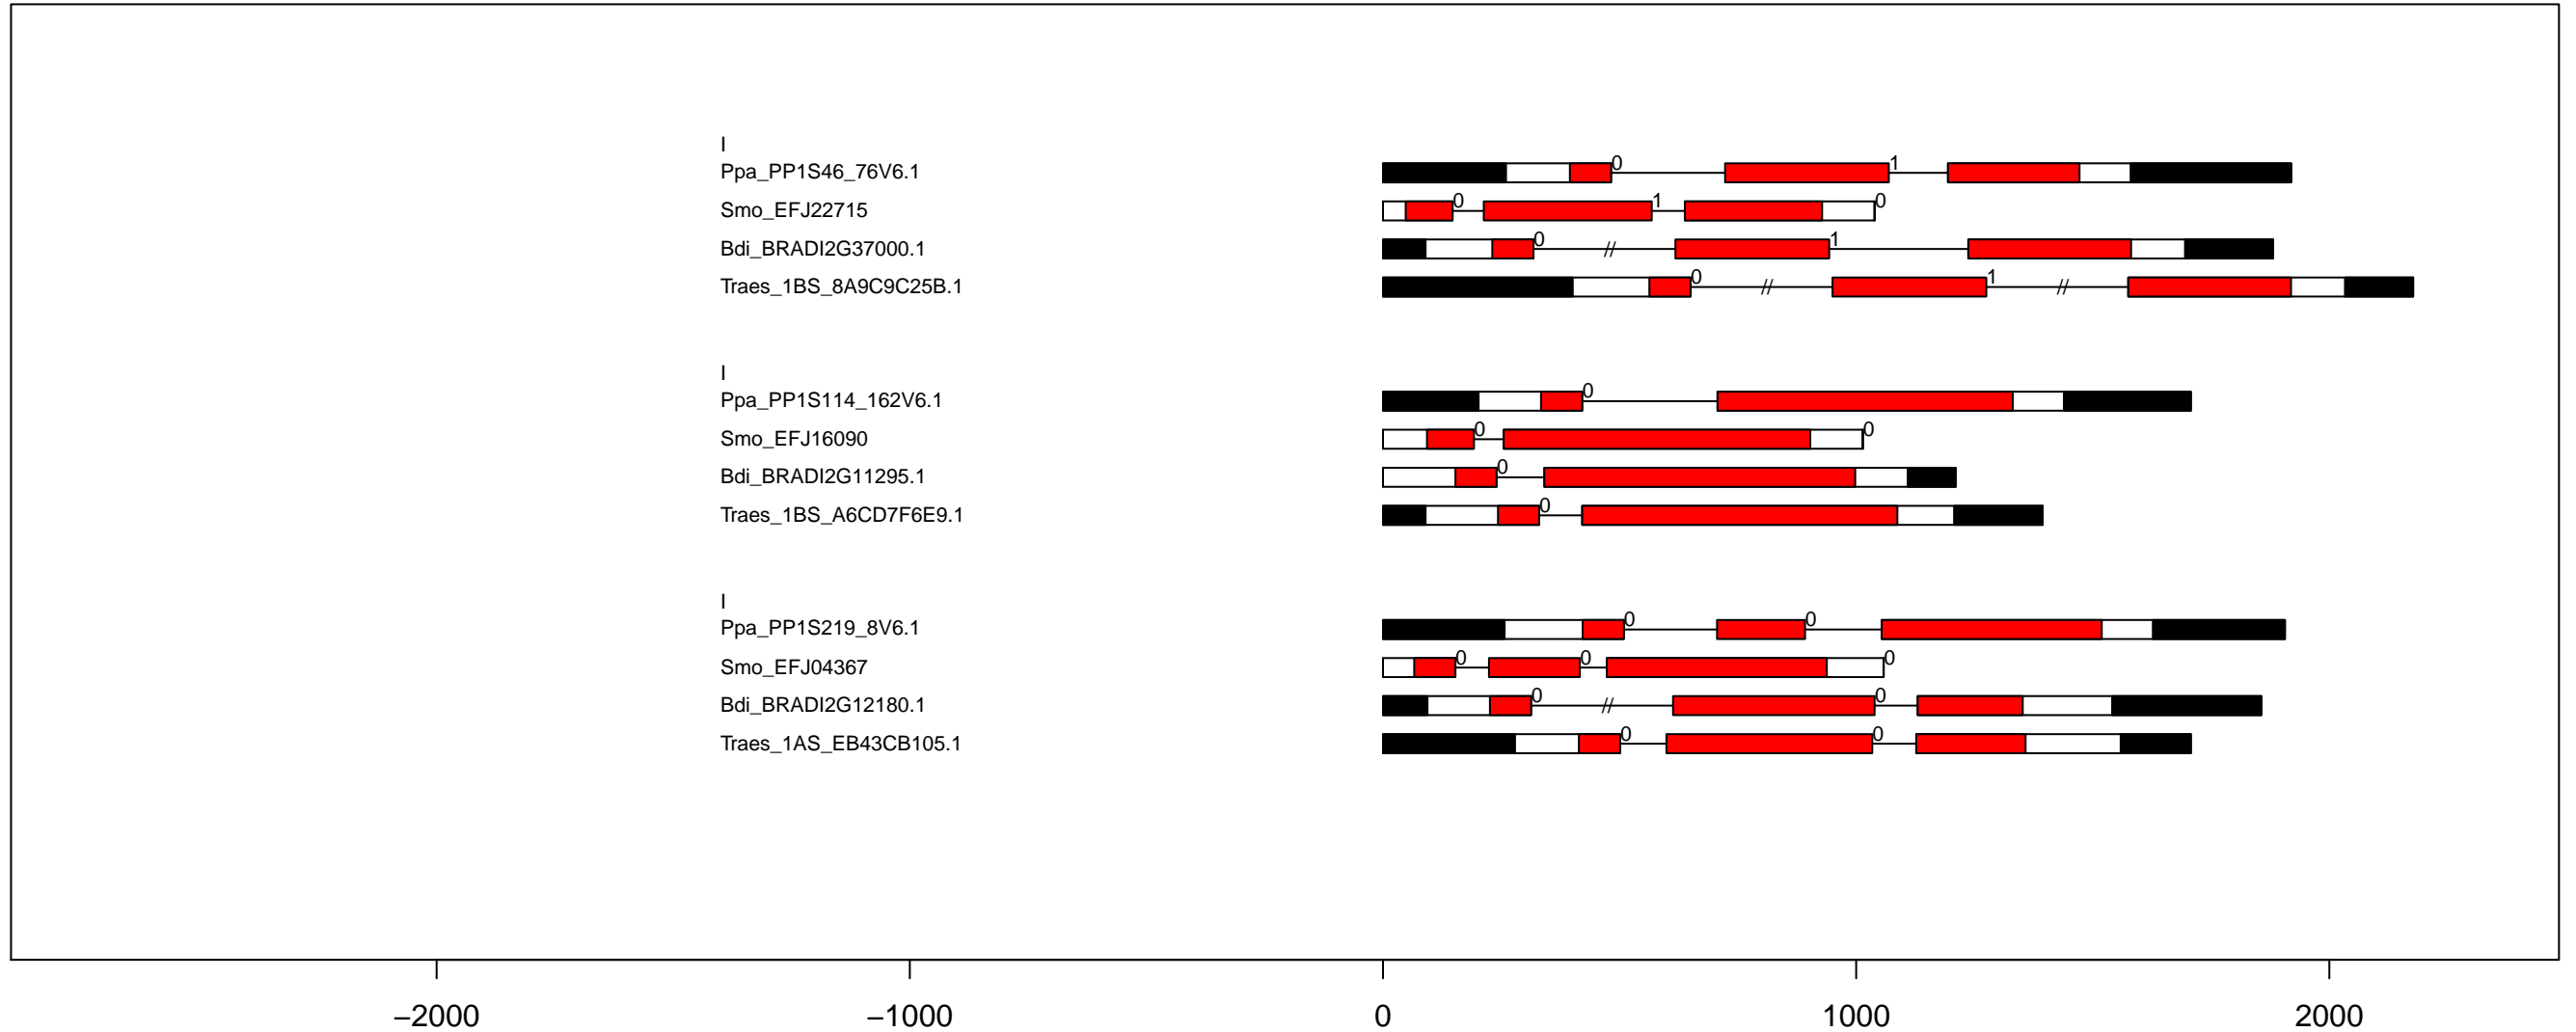

# Class III peroxidase I subfamily exon-intron and prx domain diagram (part 2)

I  
Ppa\_PP1S306\_26V6.1  
Smo\_EFJ16895  
Bdi\_BRADI5G14650.1  
Traes\_2AL\_D9106B0A2.1

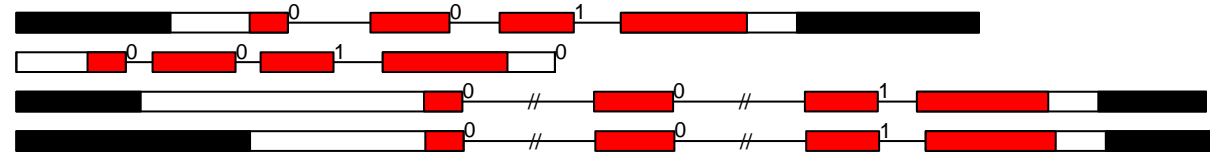



# Class III peroxidase V–XVIII subfamily exon–intron and prx domain diagram (part 1)

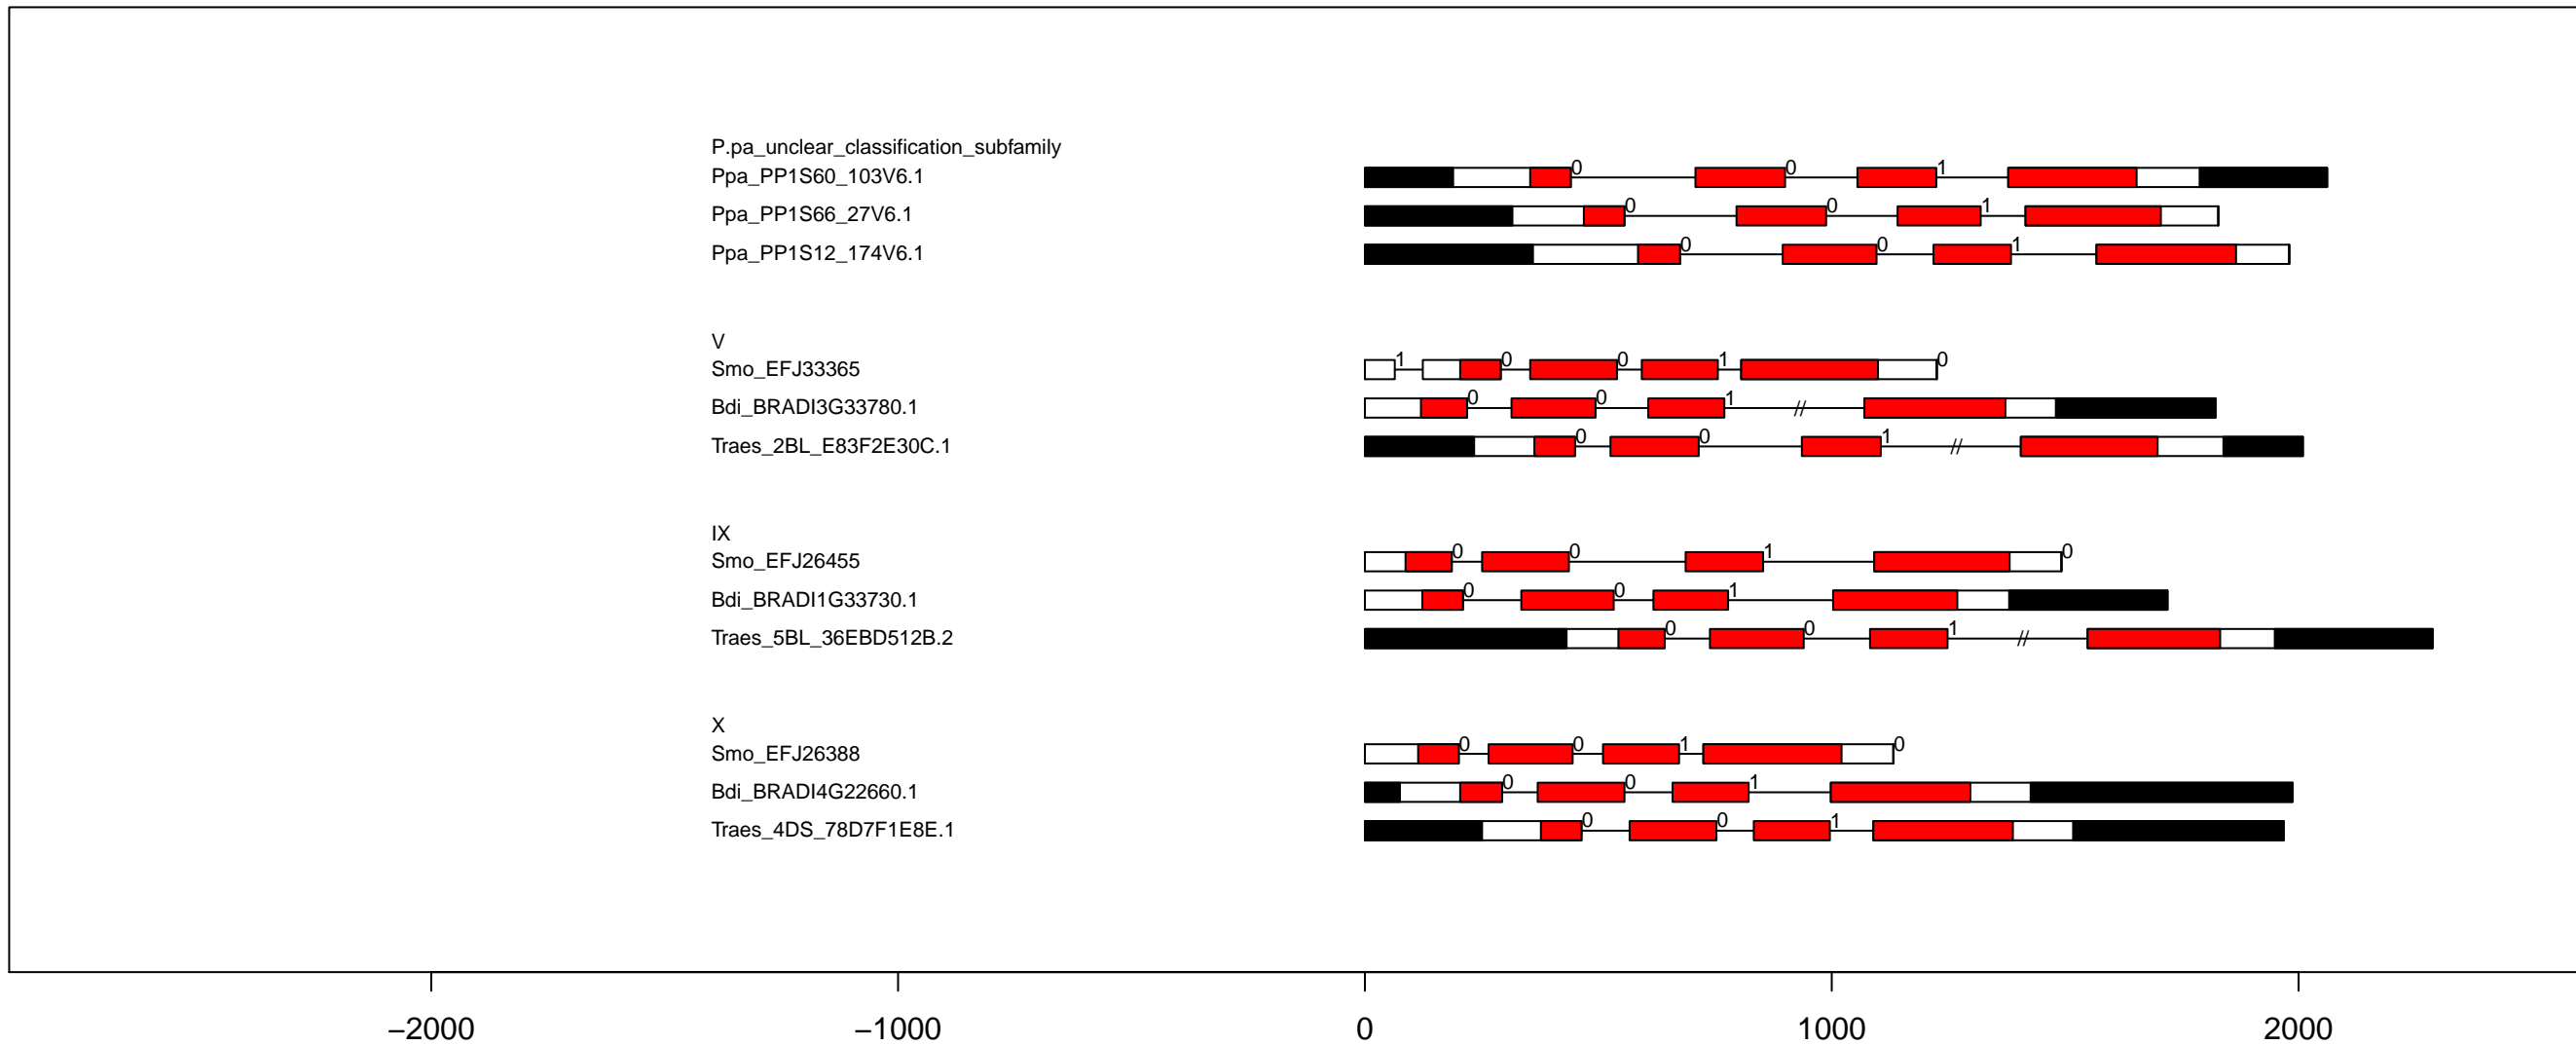

# Class III peroxidase V–XVIII subfamily exon–intron and prx domain diagram (part 2)

XII

Bdi\_BRADI1G27910.1

Traes\_1BS\_BE81667BB.1

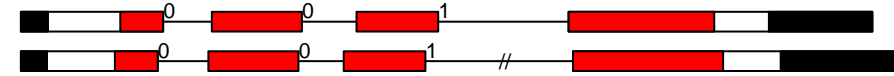

XIV

Bdi\_BRADI2G09650.1

Traes\_6DL\_2012FD949.1

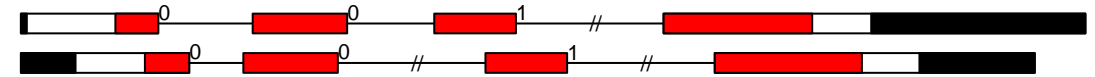

XVII

Bdi\_BRADI4G44530.1

Traes\_2AS\_64E41196E.1

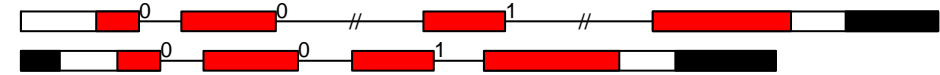

XVIII

Bdi\_BRADI1G43680.1

Traes\_7DS\_2076C1B03.1

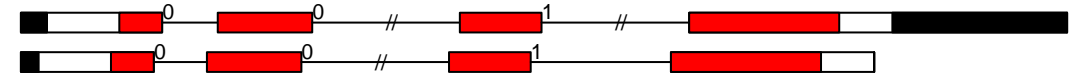

-2000

-1000

0

1000

2000
