# Supplementary material for: Genome-wide and evolutionary analysis of the class III peroxidase gene family in wheat and Aegilops tauschii reveals that some members are involved in stress responses
Source: PubMed Central journal article supplement (PMC6704529; doi:10.1186/s12864-019-6006-5), 2019-08-22

-2.0 0.0 2.0

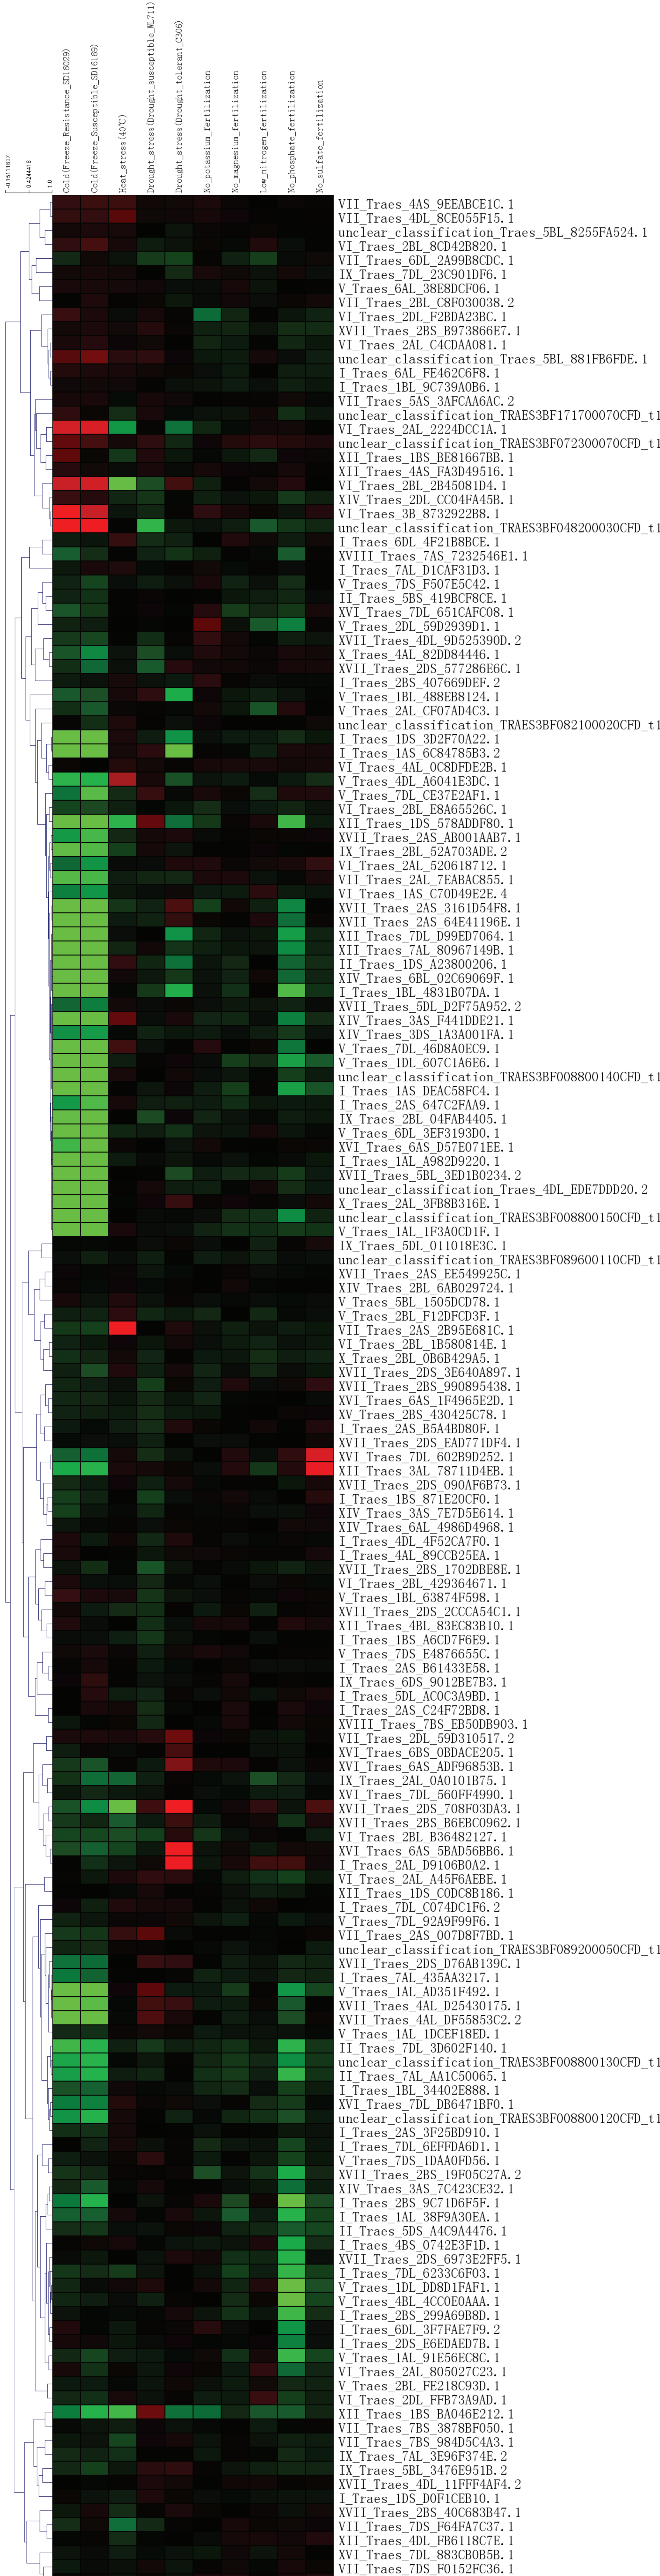

Supplement: 12864_2019_6006_MOESM7_ESM.pdf [file 12864_2019_6006_MOESM7_ESM.pdf]
