# Supplementary material for: Genome-wide and evolutionary analysis of the class III peroxidase gene family in wheat and Aegilops tauschii reveals that some members are involved in stress responses
Source: PubMed Central journal article supplement (PMC6704529; doi:10.1186/s12864-019-6006-5), 2019-08-22
Supplement: 12864_2019_6006_MOESM8_ESM.pdf [file 12864_2019_6006_MOESM8_ESM.pdf]

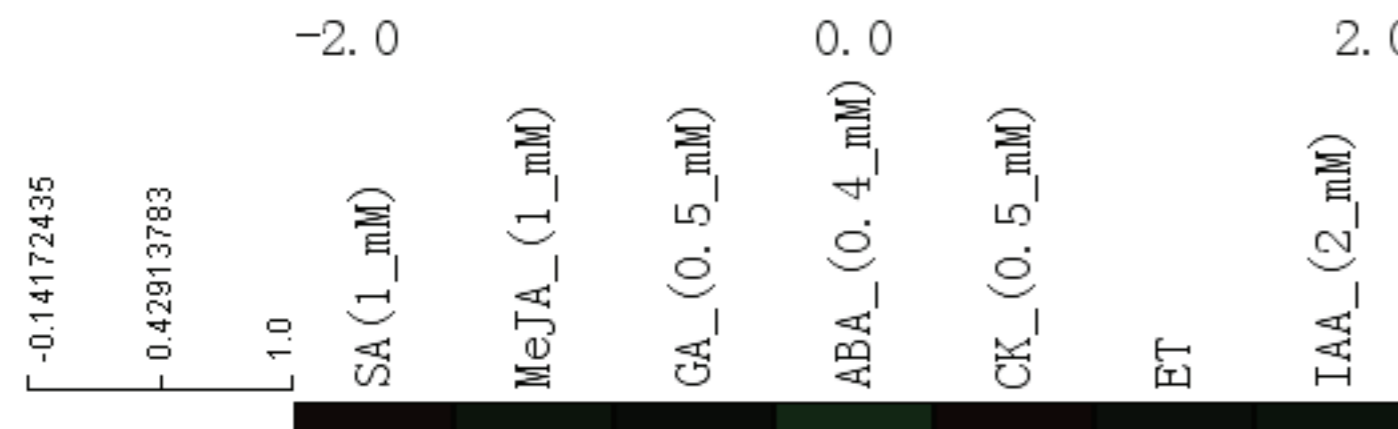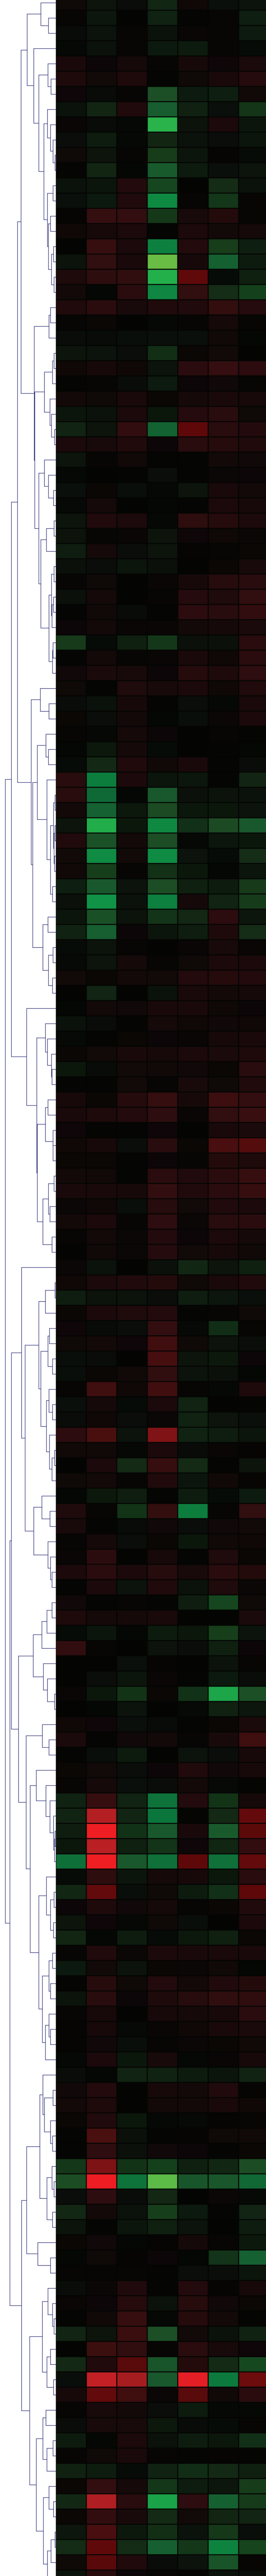

VII\_Traes\_2AS\_2B95E681C.1  
 VII\_Traes\_4DL\_8CE055F15.1  
 V\_Traes\_1AL\_1DCEF18ED.1  
 VI\_Traes\_2BL\_8CD42B820.1  
 I\_Traes\_6DL\_4F21B8BCE.1  
 VII\_Traes\_7DS\_F64FA7C37.1  
 XVII\_Traes\_4AL\_DF55853C2.2  
 I\_Traes\_1AS\_DEAC58FC4.1  
 VI\_Traes\_2AL\_2224DCC1A.1  
 X\_Traes\_4AL\_82DD84446.1  
 IX\_Traes\_5BL\_3476E951B.2  
 I\_Traes\_2AL\_D9106B0A2.1  
 V\_Traes\_7DL\_92A9F99F6.1  
 V\_Traes\_1BL\_488EB8124.1  
 VI\_Traes\_2AL\_520618712.1  
 XVI\_Traes\_6AS\_ADF96853B.1  
 XVII\_Traes\_5DL\_D2F75A952.2  
 XVII\_Traes\_5BL\_3ED1B0234.2  
 V\_Traes\_1DL\_607C1A6E6.1  
 V\_Traes\_1AL\_1F3A0CD1F.1  
 II\_Traes\_7AL\_AA1C50065.1  
 I\_Traes\_6DL\_3F7FAE7F9.2  
 I\_Traes\_1BL\_9C739A0B6.1  
 VII\_Traes\_4AS\_9EEABCE1C.1  
 VI\_Traes\_2BL\_B36482127.1  
 I\_Traes\_1AL\_A982D9220.1  
 I\_Traes\_2DS\_E6EDAED7B.1  
 VII\_Traes\_2AS\_007D8F7BD.1  
 V\_Traes\_7DL\_46D8A0EC9.1  
 XVII\_Traes\_2BS\_1702DBE8E.1  
 XVI\_Traes\_7DL\_883CBOB5B.1  
 XII\_Traes\_4AS\_FA3D49516.1  
 unclear\_classification\_TRAES3BF171700070CFD\_t1  
 XIV\_Traes\_3AS\_7E7D5E614.1  
 XIV\_Traes\_3DS\_1A3A001FA.1  
 unclear\_classification\_TRAES3BF082100020CFD\_t1  
 V\_Traes\_2AL\_CF07AD4C3.1  
 I\_Traes\_4BS\_0742E3F1D.1  
 I\_Traes\_2AS\_C24F72BD8.1  
 V\_Traes\_4BL\_4CC0E0AAA.1  
 XIV\_Traes\_2DL\_CC04FA45B.1  
 XVII\_Traes\_2DS\_EAD771DF4.1  
 XVII\_Traes\_2AS\_AB001AAB7.1  
 XIV\_Traes\_2BL\_6AB029724.1  
 XIV\_Traes\_6AL\_4986D4968.1  
 VII\_Traes\_7DS\_F0152FC36.1  
 VI\_Traes\_4AL\_0C8DFDE2B.1  
 I\_Traes\_1BS\_871E20CF0.1  
 VII\_Traes\_5AS\_3AFCAA6AC.2  
 XII\_Traes\_7DL\_D99ED7064.1  
 XIV\_Traes\_3AS\_F441DDE21.1  
 V\_Traes\_1AL\_AD351F492.1  
 VII\_Traes\_6DL\_2A99B8CDC.1  
 IX\_Traes\_2BL\_52A703ADE.2  
 XVII\_Traes\_4DL\_9D525390D.2  
 VII\_Traes\_2AL\_7EABAC855.1  
 IX\_Traes\_2BL\_04FAB4405.1  
 V\_Traes\_4DL\_A6041E3DC.1  
 V\_Traes\_6DL\_3EF3193D0.1  
 unclear\_classification\_Traes\_4DL\_EDE7DDD20.2  
 V\_Traes\_1AL\_91E56EC8C.1  
 I\_Traes\_4DL\_4F52CA7F0.1  
 XIV\_Traes\_3AS\_7C423CE32.1  
 X\_Traes\_2BL\_0B6B429A5.1  
 unclear\_classification\_Traes\_5BL\_8255FA524.1  
 VI\_Traes\_2DL\_FFB73A9AD.1  
 XVII\_Traes\_2DS\_3E640A897.1  
 I\_Traes\_4AL\_89CCB25EA.1  
 I\_Traes\_7DL\_C074DC1F6.2  
 II\_Traes\_5BS\_419BCF8CE.1  
 unclear\_classification\_TRAES3BF008800140CFD\_t1  
 IX\_Traes\_6DS\_9012BE7B3.1  
 VI\_Traes\_3B\_8732922B8.1  
 I\_Traes\_2AS\_B5A4BD80F.1  
 VI\_Traes\_2DL\_F2BDA23BC.1  
 VI\_Traes\_2BL\_2B45081D4.1  
 V\_Traes\_6AL\_38E8DCF06.1  
 XII\_Traes\_3AL\_78711D4EB.1  
 I\_Traes\_5DL\_AC0C3A9BD.1  
 unclear\_classification\_TRAES3BF089600110CFD\_t1  
 I\_Traes\_1BS\_A6CD7F6E9.1  
 VI\_Traes\_2BL\_1B580814E.1  
 XVIII\_Traes\_7BS\_EB50DB903.1  
 VII\_Traes\_7BS\_984D5C4A3.1  
 V\_Traes\_7DS\_E4876655C.1  
 XVI\_Traes\_6AS\_D57E071EE.1  
 VII\_Traes\_2BL\_C8F030038.2  
 unclear\_classification\_Traes\_5BL\_881FB6FDE.1  
 I\_Traes\_2BS\_299A69B8D.1  
 XVIII\_Traes\_7AS\_7232546E1.1  
 V\_Traes\_2BL\_FE218C93D.1  
 XVI\_Traes\_7DL\_DB6471BF0.1  
 unclear\_classification\_TRAES3BF089200050CFD\_t1  
 XVII\_Traes\_2BS\_990895438.1  
 IX\_Traes\_7AL\_3E96F374E.2  
 XVI\_Traes\_6AS\_1F4965E2D.1  
 IX\_Traes\_5DL\_011018E3C.1  
 XII\_Traes\_4DL\_FB6118C7E.1  
 XVI\_Traes\_7DL\_602B9D252.1  
 XII\_Traes\_1BS\_BA046E212.1  
 XV\_Traes\_2BS\_430425C78.1  
 I\_Traes\_2BS\_407669DEF.2  
 V\_Traes\_7DS\_1DAA0FD56.1  
 I\_Traes\_1BL\_34402E888.1  
 V\_Traes\_1BL\_63874F598.1  
 XVII\_Traes\_4AL\_D25430175.1  
 XVII\_Traes\_2BS\_B973866E7.1  
 I\_Traes\_7AL\_435AA3217.1  
 IX\_Traes\_2AL\_OA0101B75.1  
 V\_Traes\_1DL\_DD8D1FAF1.1  
 VII\_Traes\_7BS\_3878BF050.1  
 I\_Traes\_7DL\_6EFFDA6D1.1  
 I\_Traes\_7AL\_D1CAF31D3.1  
 XVII\_Traes\_2AS\_EE549925C.1  
 XIV\_Traes\_6BL\_02C69069F.1  
 unclear\_classification\_TRAES3BF072300070CFD\_t1  
 V\_Traes\_7DS\_F507E5C42.1  
 XVII\_Traes\_2DS\_6973E2FF5.1  
 XVII\_Traes\_2AS\_64E41196E.1  
 XVII\_Traes\_2AS\_3161D54F8.1  
 XVII\_Traes\_2DS\_708F03DA3.1  
 XVII\_Traes\_2BS\_B6EBC0962.1  
 I\_Traes\_1AS\_6C84785B3.2  
 VII\_Traes\_2DL\_59D310517.2  
 XVII\_Traes\_2DS\_D76AB139C.1  
 VI\_Traes\_2AL\_805027C23.1  
 V\_Traes\_2DL\_59D2939D1.1  
 XII\_Traes\_4BL\_83EC83B10.1  
 unclear\_classification\_TRAES3BF008800130CFD\_t1  
 XVII\_Traes\_2DS\_090AF6B73.1  
 VI\_Traes\_2BL\_429364671.1  
 VI\_Traes\_2AL\_A45F6AEBE.1  
 V\_Traes\_5BL\_1505DCD78.1  
 I\_Traes\_2BS\_9C71D6F5F.1  
 V\_Traes\_2BL\_F12DFCD3F.1  
 XVII\_Traes\_2DS\_2CCCA54C1.1  
 XII\_Traes\_1DS\_C0DC8B186.1  
 I\_Traes\_7DL\_6233C6F03.1  
 I\_Traes\_2AS\_B61433E58.1  
 XVI\_Traes\_7DL\_651CAFC08.1  
 XVII\_Traes\_2DS\_577286E6C.1  
 XVII\_Traes\_2BS\_19F05C27A.2  
 XVI\_Traes\_6BS\_OBDACE205.1  
 XVI\_Traes\_6AS\_5BAD56BB6.1  
 X\_Traes\_2AL\_3FB8B316E.1  
 XVII\_Traes\_2BS\_40C683B47.1  
 XVI\_Traes\_7DL\_560FF4990.1  
 XVII\_Traes\_4DL\_11FFF4AF4.2  
 XII\_Traes\_1DS\_578ADDF80.1  
 I\_Traes\_1DS\_D0F1CEB10.1  
 unclear\_classification\_TRAES3BF008800120CFD\_t1  
 XII\_Traes\_7AL\_80967149B.1  
 I\_Traes\_1AL\_38F9A30EA.1  
 IX\_Traes\_7DL\_23C901DF6.1  
 VI\_Traes\_2AL\_C4CDA081.1  
 I\_Traes\_1BL\_4831B07DA.1  
 unclear\_classification\_TRAES3BF008800150CFD\_t1  
 I\_Traes\_2AS\_3F25BD910.1  
 II\_Traes\_7DL\_3D602F140.1  
 VI\_Traes\_1AS\_C70D49E2E.4  
 I\_Traes\_2AS\_647C2FAA9.1  
 II\_Traes\_5DS\_A4C9A4476.1  
 I\_Traes\_6AL\_FE462C6F8.1  
 VI\_Traes\_2BL\_E8A65526C.1  
 I\_Traes\_1DS\_3D2F70A22.1  
 V\_Traes\_7DL\_CE37E2AF1.1  
 II\_Traes\_1DS\_A23800206.1  
 XII\_Traes\_1BS\_BE81667BB.1  
 unclear\_classification\_TRAES3BF048200030CFD\_t1  
 I\_Traes\_2BS\_9D472D49F.1
