# Supplementary material for: Genome-wide and evolutionary analysis of the class III peroxidase gene family in wheat and Aegilops tauschii reveals that some members are involved in stress responses
Source: PubMed Central journal article supplement (PMC6704529; doi:10.1186/s12864-019-6006-5), 2019-08-22
Supplement: 12864_2019_6006_MOESM9_ESM.pdf [file 12864_2019_6006_MOESM9_ESM.pdf]

>Traes\_2DS\_D76AB139C.1

```

+ GTTAATGCAT CATCATTAAC TAGATGGGAT GATGATTTTG TTGTGGCCGT AAAGATTCA AGAAACATTG
- CAATTACGTA GTAGTAATTG ATCTACCCTA CTACTAAAAC AACACCGCA TTTCTAAAGT TCTTTGTAAC

+ TAGATTGAGG AACAGTACAT GAGCTAAAAA ATTGTTTATG GCGATTGCTA CCTAGATTTA AAAATAATTA
- ATCTAACTCC TTGTCAATGA CTCGATTTTT TAACAAATAC CGCTAACGAT GGATCTAAAT TTTTATTAAT

+ TTATTTTCATC AAATCTGTTT GGGTTCTTTC CACCCGTAAG GAATCATGA AGAATGGTT ATCTTTGCAG
- AATAAAGTAG TTTAGACAAA CCCAAGAAG GTGGCATTCT CCTTAGTACT TCTTAACCAA TAGAAACGTC

+ TGCGAGGTTT CCTCTTTGGG ACGCGAATAC AAAAATCAT GAAGAGTTTT GTACTAGGAA AACAAAGGTT
- ACGTCCAAG GGAGAAACCC TGGCCTTATG TTTTGTAGTA CTCTCAAAA CATGATCCTT TTGTTTCCAA

+ CTCTCAAGA TTAAGGCTTC CAATTAATAA CAGACTCGGT GAAGGTTGAG CTTGGGCTT CCATTCGGAG
- GAGAAGTCT AATTCCGAAG GTTAATTTTT GTCTGAGCCA CTTCCAATC GAAGCCCGAA GGTAAGCCTC

+ AGTGGGGTTC AGTTTATTTT CTTCCATCGG TTGATTCAGA CAAGGACCAC CATGGAATTC GTATCAAGTT
- TCACCCCAAG TCAATAAAAA GAAGGTAGCC AACTAAGTCT GTTCTGGTG GTACCTTAAG CATAGTTCAA

+ GACCGATCGT CTGGCGACAT GGTTCGGGT TGACAATCTC AATCTATACC GGAGGTTACA CTCATCAAGG
- CTGGCTAGCA GACCGCTGTA CCAAGACCCA ACTGTTAGAG TTAGATATGG CCTCCAATGT GAGTAGTTCC

+ GTCACGACA CACCCATTTT GCTGTGTGC ACGTACCTAG TTAATAAACA TCGTTATCCC ACTCTCGCAT
- CAGTTGCTGT GTGGGTAAAA CGACAACAC TGCAATGGATC AATTATTTGT AGCAATAGGG TGAGAGCGTA

+ GTATGCGTCG ACCCATGCA CACTATCAT ATACGCCCAT TCTTACAATT GTCGATTATG GTTGCTAACA
- CATAACGAGC TGGGTAACGT GCTGATAGTA TATGCGGGTA AGAATGTTAA CAGCTAATAC CAACGATTGT

+ TTGACGACG TTGTCTAGAT CAGTGACGGC AATCCACCT TAATTTATGT TGTTTTTCAC TACTACAACA
- AACGTCGTGC AACAGATCTA GTCACGCGG TTAGGTGGGA ATTAATAACA ACAAAGAGT ATGATGTTGT

+ CCGAGGCATC GTAGAGCACA TGGTATGAAG CAAGACCCTA CCTGTCTCGT CTCTCACCC TCCGTCGGCA
- GGCTCCGTAG CATCTCGTGT ACCATACTTC GTTCTGGGAT GGACAGAGCA GAGGAGTGGG AGGCAGCCGT

+ TCTCCCTGT CACTTGGCGC CTTCTCTCAA TATCATGTGC TTTTGGGAG CCAGCACCGT CGTTACATCG
- AGAGGGGACA GTGAACCCG GGAAGGAGTT ATAGTACACG AAAACCTCC GGTCTGGCA GCAATGTAGC

+ ACCTTCCTCT TTGCGCTACA AGATTCGTC ATTTTCTAA GAGTTAGAAG GTTAAGTTAG ACCAAAACAA
- TGGAAGGAGA AACCGATGT TCTACAGCAG TAACAAGATT CTCAATCTTC CAATCAATC TGGTTTGT

+ AGTTGATGGT TGTATAAAAT ACTCAACTAC AAGTAGATAG ACTTAGGCGT GAGCAAACCG GCAATCGAAC
- TCAACTACCA ACATATTTTA TGAGTTGATG TTCATCTATC TGAATCCGCA CTCGTTGGGC CGTCAGCTTG

+ CGGCTTGGCC TCACTTTCTC CTCAGAAGCT CGGAAAAGGC TATGAAATGA TTGTTTTTTA GATCTTTCTT
- GCCGAACCG AGTGAAAGGA GAGTCTTCGA GCCTTTCCG ATACTTTACT AACAAAAAT CTAGAAAGGA

+ AAAATATGCT TAAAAGGTAT AGTTATTCAT TTTTCTTCC TGGGACCAAT TATTTAAAAA AAAAAATAGC
- TTTTATACGA ATTTTCCATA TCAATAAGTA AAAAGGAAG ACCCTGGTTA ATAAATTTTA TTTTATATCG

+ CTTTCTTTGT GATAAGACAA CACCGGGCTA AGCCCTGGCT TGGCATTTTT AGGTTGGGCT TTTGCGAACC
- GAAAGAAACA CTATTCGTT GTGGCCCGAT TCGGGACCGA ACCGTAAAAA TCCAACCCGA AAACGCTTGG

+ CGATCCAAAA ACCTAGCCTC ACCTGGGGTA TGTATGCTA TACAACCCAT GGCGCCTTGG CCACGCTTC
- GCTAGGTTTT TGGATCGGAG TGGACCCAT ACAATACGAT ATGTTGGGTA CCGCGGAACC GGTGCGGAAG

+ CCAGCGTTTG GATTGAACTA CCGATGGATG ATTTGTTTTAT TGCTATGGGA TTGGTAAATC TCACGCGACT
- GGTGCGAAAC CTAACCTGAT GGCTACCTAC TAAACAAATA ACGATACCCT AACCAATTTAG AGTGGCGTGA

+ GGTACTTAAC CAAGTCTCAG TCGATGTTAT ATTCGTCTGC TCCATCATG CACTTGATGT TATTGCTAAG
- CCATGAATG GTTCAGAGTC AGCTACAATA TAAGCAGACG AGGTAGTAAC GTGAATACA ATAACGATTC

+ CCTAGCCTTG ATTGATCCAT GTATGGTAC CTGGTGTAG AGAACAGATA GCTACTTGAA GGTCTGACC
- GGATCGGAAC TAACTAGGTA CATAACAGT GACCACAATC TCTGTCTAT CGATGAACCT CCAGCACTGG

+ CAGTGTCTGA ATGTCTCGTG TTGGCCGAAG GCGACGGGAG CGCAAGATGA CTGCGCACCG GTCAAAACGA
- GTCGACGACT TAACAGGCAC AACCGCTTC CGTCTCCCTC GCGTCTACT GACGCGTGGC CAGTTTGTCT

+ AGTGAATCGC CTTGGAATAA CGCTGACTCC CCACACTACT ATTCGACGT AAGGCCAAAA GGTGGTGTG
- TCACTTAGCG GAACCTTATT GCGACTGAGG GGTGTGATGA TAAGGTGCA TCCGTTTTT CCAACCACAC

+ CGCGCACACA TGCTCCAGG CGTCCGCTAG CATGGAGGTG ATGAAAAAAG AGAGATCGTT CAATGTTTTG
- GCGCGTGTGT ACCGAGTCC GCAGGCGATC GTACCTCCAC TACTTTTTTC TCTCTAGCAA GTTACAAAAC

+ CCGATTTTTG CGTGATAAAC GCCAAGAGAG ATCGCTCAAG TTGGCCCTGT TGCAAGGAAA ATGCAGGTGT
- GGCTAAAAAC GCACTATTTG CGGTTCTCTC TAGCGAGTTC AACCGGGACA ACGTTCCTTT TACGTCCACA

+ TGGTGTGGC GGTAGCGGCT CAAGCTGGAA GCTGCCACGA ATACGCCAAG AGAAATCGCT CAAGCTGGAA
- ACCACAACCG CCATCGCCGA GTTCGACCTT CGACGGTGT TATGCGGTTT TCTTTAGCGA GTTCGACCTT

+ GCTCGCAGTA TACCCGATGG ATCGAACGGG AGTCAGAGAC TAACGTTGGA CTAATGTGAC CTAATTTTTG
- CGAGCGTCAT ATGGGCTACC TAGCTTGCCC TCAGTCTCTG ATTGCAACCT GATTACACTG GATTAAAAAC

+ GATGAGCTAT CGCTAGTCGG AGACTGGGAG CGATCTGAAG GTGCACGTTA GCTAAATCTT TGGCTATAAA
- CTACTCGATA GCGATCAGCC TCTGACCCTC GCTAGACTTC CACGTGCACT CGATTTAGAA ACCGATATTT

+ TATGCATGCT ATGCACCACT CTCTTGACA AGCCACTA
- ATACGTACGA TACGTGGTGA GAGAAGTGT TCGGTGAT

```

Motifs Found

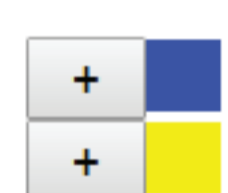

ABRE

| Site Name | Organism             | Position | Strand | Matrix score. | sequence   | function                                                    |
|-----------|----------------------|----------|--------|---------------|------------|-------------------------------------------------------------|
| ABRE      | Hordeum vulgare      | 518      | -      | 9             | CGTACGTGCA | cis-acting element involved in the abscisic acid responsive |
| ABRE      | Arabidopsis thaliana | 1586     | -      | 5             | ACGTG      | cis-acting element involved in the abscisic acid responsive |
| ABRE      | Arabidopsis thaliana | 637      | -      | 5             | ACGTG      | cis-acting element involved in the abscisic acid responsive |
| ABRE      | Arabidopsis thaliana | 1935     | +      | 5             | ACGTG      | cis-acting element involved in the abscisic acid responsive |
| ABRE      | Arabidopsis thaliana | 520      | -      | 5             | ACGTG      | cis-acting element involved in the abscisic acid responsive |
| ABRE      | Arabidopsis thaliana | 1934     | -      | 6             | CACGTG     | cis-acting element involved in the abscisic acid responsive |
| ABRE      | Arabidopsis thaliana | 965      | +      | 7             | AACCCGG    | cis-acting element involved in the abscisic acid responsive |

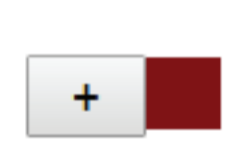

ABRE3a

| Site Name | Organism | Position | Strand | Matrix score. | sequence | function |
|-----------|----------|----------|--------|---------------|----------|----------|
| ABRE3a    | Zea mays | 520      | -      | 6             | TACGTG   |          |
| ABRE3a    | Zea mays | 1586     | -      | 6             | TACGTG   |          |

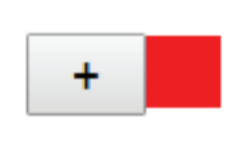

ABRE4

| Site Name | Organism | Position | Strand | Matrix score. | sequence | function |
|-----------|----------|----------|--------|---------------|----------|----------|
| ABRE4     | Zea mays | 520      | +      | 6             | CACGTA   |          |
| ABRE4     | Zea mays | 1586     | +      | 6             | CACGTA   |          |

- + AT-rich sequence
- + CAAT-box
- + CAT-box
- + CGTCA-motif

| Site Name   | Organism        | Position | Strand | Matrix score. | sequence | function                                                      |
|-------------|-----------------|----------|--------|---------------|----------|---------------------------------------------------------------|
| CGTCA-motif | Hordeum vulgare | 654      | -      | 5             | CGTCA    | cis-acting regulatory element involved in the MeJA-responsive |
| CGTCA-motif | Hordeum vulgare | 867      | +      | 5             | CGTCA    | cis-acting regulatory element involved in the MeJA-responsive |

- + DRE core
- + ERE
- + G-Box
- + G-box
- + GT1-motif
- + MRE
- + MYB
- + MYB-like sequence
- + MYC
- + Myb-binding site
- + P-box

| Site Name | Organism     | Position | Strand | Matrix score. | sequence | function                       |
|-----------|--------------|----------|--------|---------------|----------|--------------------------------|
| P-box     | Oryza sativa | 1596     | -      | 7             | CCTTTTG  | gibberellin-responsive element |

- + STRE
- + TATA
- + TATA-box
- + TATC-box
- + TC-rich repeats
- + TCT-motif
- + TGA-element

| Site Name   | Organism          | Position | Strand | Matrix score. | sequence | function                 |
|-------------|-------------------|----------|--------|---------------|----------|--------------------------|
| TGA-element | Brassica oleracea | 494      | +      | 6             | AACGAC   | auxin-responsive element |
| TGA-element | Brassica oleracea | 829      | -      | 6             | AACGAC   | auxin-responsive element |

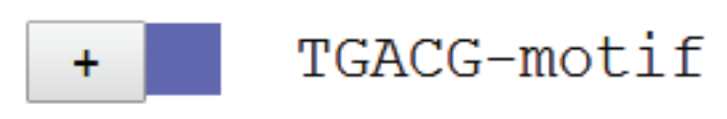

TGACG-motif

| Site Name   | Organism        | Position | Strand | Matrix score. | sequence | function                                                      |
|-------------|-----------------|----------|--------|---------------|----------|---------------------------------------------------------------|
| TGACG-motif | Hordeum vulgare | 654      | +      | 5             | TGACG    | cis-acting regulatory element involved in the MeJA-responsive |
| TGACG-motif | Hordeum vulgare | 867      | -      | 5             | TGACG    | cis-acting regulatory element involved in the MeJA-responsive |

- + Unnamed\_1
- + Unnamed\_2
- + Unnamed\_4
- + W box
- + as-1

>Traes\_2DS\_2CCCA54C1.1

```

+ GCCAAGGCAG ACCACGTAAT ATTATCGAGT ACATGATATG CCTGCAAAGT CATATTGTGC GGTTCCGTCA
- CGGTTCCGTC TGGTGCAATT TAATAGCTCA TGTACTATAC GGACGTTTCA GTATAACACG CCAAGGCAGT

+ TGTACCGGTA GATCCCTAGAC CGGCCGTTTA CTCCGCGATT CGTGTAGTAG CTGGCCACG TCCTTGTATA
- ACATGGCCAT CTAGGATCTG GCCGGCAAAT GAGGCCTAA GCACAATCAC GACCGGGTGC AGTAACATAT

+ TCATATGTAT TGTGCTGCA AAACCTGCCG TATTTGTAAT ATGCGAGGAA AGTGGCCGGA ACCCGCCAAC
- AGTATACATA ACACGGACGT TTTGACGGGC ATAAACATTA TACGCTCCTT TCACCGGCCT TGGGCGGTTG

+ CACTTTTGGT CAGTTTTTCA TTTACTCAAC CGCACTTACC GGGACCTGCC TCCTTCACTC CGATTCCCCC
- GTGAAAACCA GTCAAAAAGT AAATGAGTTG GCGTGAATGG CCCTGGACGG AGGAAGTGAG GCTAAGGGGG

+ CTTCTCTTCC TTCTTCTTCC AGCACTTGGC ACTACTCTCC ACTTTGTAGA AGTCTAGCGC CTGGTCAGAA
- GAAGAGAAGG AAGAAGGAGG TCGTGAACCG TGATGAGAGG TGAACATCTT TCAGATCGCG GACCAGTCTT

+ TGGCATTCTT AAAAGTACCG AAATAATATG TGAACATCTG TGTGTATTT TGTTTGAAGA AAAGACAGAA
- ACCGTAAAGA TTTTCATGGC TTTATTATAC ACTTGTAGAC ACAACATAAA ACAAACTTCT TTTCTGTCTT

+ AAATAGAAAT AAAATGTGTC CTTAAGTTAT TTAGATAAAA ATTGCAAGAT TTTTATTGT GACTTAACCT
- TTTATCTTTA TTTTAAACAG GAATTCATAA AATCTATTTT TAACGTTCTA AAAAAATAACA CTGAATTGCA

+ GCTGCTCGTT TGTTCCTTGG CGAAAGCGAT CGTGAGACTT GTGCGCTCGA ACTAGGCATG CCTCAAGGCC
- CGACGAGCAA ACAAGAACTC GCTTTCGCTA GCACTCTGAA CACGCGAGCT TGATCCGTAC GGAGTTCCGG

+ TCATGCTGCT GGGCCGGCCC ATATAGAATG CTGGAGGTGA GTCGCATGTA GTAGGCGACA TTTAGATGCA
- AGTACGACGA CCCGCGCGG TATATCTTAC GACCTCCACT CAGCGTACAT CATCCGCTGT AAATCTACGT

+ CCCAACAAAC ACACCGAGCG AACGGAAGAA GCCCAAATGG CGTGCAGGTA GAGGATGATT TGGCCCAAAC
- GGGTTGTTGT TGTGGCTCGC TTGCCTTCTT CGGGTTTACC GCACGCCGAT CTCTACTAA ACCGGGTTTG

+ TATTTCTCTG CAGGCTCGC TCTGAACCAA GTACCTCTAG AGCATGAAAG AAACCTGGAC TGCTGAATTG
- ATAAAGGAGC GTCCGACGC AGACTTGGTT CATGGAGATC TCGTACTTTC TTTGACCGTG ACGACTTAAC

+ CATCGTGTCA CTTTCATCGA ACACAACCTG TGTGCAAGAT GATGCGCTGT GGTCAAAGCG AGGCTGAATT
- GTAGCACAGT GAAAGTAGCT TGTGTTGGAC ACACGTTCTA CTACGCGACA CCAGTTTCGC TCCGACTTAA

+ AACTTGGACA GAAGCGGACT CCCTACTACT CACTCCGCTT CAAAATAAAT GTCTCAAACA TAGTAAACT
- TTGAACCTGT CTTCCGCTGA GGGATGATGA GTGAGGCAGA GTTTTATTTA CAGAGTTTGT ATCATTTTGA

+ TTATACTATA ATAGTGTAAA GTTGGAGCAC TTATTTTGGG ACGAAGTGAAG TATTAGTTAG ACCAAATGGC
- AATATGATAT TATCACATTT CAACTCTGTG AATAAAACCC TGCTTCACTC ATAAATCAATC TGGTTTACCG

+ GCGTCCATGC GTAGCTCCAG GCTCGGGCTG TATCACCATG TGCAATAGCA TCCATGGAGC TCGTTCCATG
- CGCAGGTACG CATCGAGGTC CGAGCCCAGC ATAGTGGTAC ACGTTATCGT AGGTACCTCG AGCAAGGTAC

+ TAGTTGGAGA TGAACCTATG TATGGTGCAT GTGGACGTAT GCGCCTGTTT ACTCCGGTAG TAGAGTGCA
- ATCAACCTCT ACTTGGATAC ATACCACGTA CACCTGCATA CCGGACAAA TGAGGCCATC ATCTCACGTC

+ GTTAGCTCTT TTACGGTGCA AAGTGAATTT TGTGTTGGGG TTTAATTACC CCCACGTTAG CTGCGGGAGA
- CAATCGAGAA AATGCCACGT TTCACTTTAA ACACAACCC AAATTAATGG GGGTSCAAAC GACGCCCTCT

+ GGAGACACAT CATGAATTTA AAGCGATGG TATCCTCTCC TGTAAGGTTA TTCTTTGACGTGATG
- CCTCTGTGTA GTACTTAAAT TTCGCTACC ATAGGAGAGG ACATTCCAAT AAGAAAACCTG CACTAGCTAC

+ ATTCAAACC TCTTATAAAA CATATGTTGC TCTTCAGCTA GGCTGACCG TAGGACGAAA TGCTCATGTA
- TAAGTTTTGG AGAATATTTT GTATAACAAG AGAAGTCGAT CCGGATGGC ATCCTGCTTT ACGAGTACAT

+ GCGGGCTAT GAGGCTATGA CGCAATAACA CTTGTTTGGC CGGCCCGGAG TCGCTTGACA AAAAAAGCAT
- CGGCCGATA CTCCGATACT GCGTTATGTT GAACAAAACG GCCGGCCTC AGCGAACTGT TTTTTCGTA

+ GTTAAGTTTA TTTACAATTG AAAAGCCTAA CAATCTTATA TTCCTCAA GCAGGTTTAC GACCACAGCT
- CAATCAAAT AAATGTTAAC TTTTCGGATT GTTAGAATAT AAGGGAGTTT CGTCCAAGTG CTGGTGTGCA

+ ATACCTAAAA AAATGATGAA GAATATATTA CTCCATTATT ATGAGATGAA CCACCTGGCA AGAGTGGTAA
- TATGGATTTT TTTACTACTT CTTATATAAT GAGGTAATAA TACTCTACTT GGTGAACCGT TCTCACCATT

+ GCTATATCAA AAAACAATGA ACATTATATG GAGATGCTGT ATGCCATTAT TGATTGCGAG ACATACGTTT
- CGATATAGTT TTTTGTACTT TGTAATAATA CTCTACGACA TACGGTAATA ACTAAGCGTC TGTATGCAAG

+ CTCTCTCCA CGGGCACCTA ACGGATACAT GATAAGGCCA AGGCAGATCA CGGAAATTA TTCGAATACA
- GAGAGAGGGT GCCCGTGGAT TGCCATGTA CTATTCGGT TCCGCTAGT GCCCTTAAAT AAGCTTATGT

+ TGATAAGCCC TATTGCCGGA AAAAAATGC AGGGCTGGTG TTGGCCGTAG CGATTTAAGC ACTCTGACCC
- ACTATTCCGG ATACGGCCT TTTTTCACG TCCCAGCAC AACCGGCATC GCTAAATTCG TGAGACTGGG

+ TTCTAAAAAA TCGCGCGCTT TGTCCGTATA CGTATCCCTT ATCCAACATC TAGCTGGCCA CACGACGGGG
- AAGATTTTTT AGCCGCCGAA ACAGGCATAT GCATAGGGGA TAGGTTGTAG ATCGACCGGT GTGCTGCCCC

+ CTGGCAGAT CGTGGATGCC GGGTFCAGCT CGATCGTCAG CCATCATAGA CCAATCGAATCTGTTTGT
- GACCCGTCTA GCACCTACGG CCCAGCTGCA GCTACGAGTC GGTAGTATCT GGTTAGCTGG TAGACAAAAC

+ GATGCTTGT AGACTAATCA GACATAAAAT TTGGATGCTT TCTCCAACT GGGAGACGGG GACTGATGTG
- CTACGAACGA TCTGATTAGT CTGTATTTTA AACCTACGAA AGAGGGTTGA CCCTCTGCC CTGACTACAC

+ CAGCTGCACG TGAGCTAAAA TTTTCCCTAT AAATATGC
- GTCGACTGCACTCGATTTT AAAAGGGATA TTTATACG

```

Motifs Found

- + ■
- + ■ AAGAA-motif
- + ■ ABRE

| Site Name            | Organism             | Position | Strand | Matrix score. | sequence   | function                                                        |
|----------------------|----------------------|----------|--------|---------------|------------|-----------------------------------------------------------------|
| <a href="#">ABRE</a> | Arabidopsis thaliana | 13       | -      | 5             | ACGTG      | cis-acting element involved in the abscisic acid responsiveness |
| <a href="#">ABRE</a> | Arabidopsis thaliana | 1306     | -      | 7             | TACGGTC    | cis-acting element involved in the abscisic acid responsiveness |
| <a href="#">ABRE</a> | Arabidopsis thaliana | 1173     | -      | 5             | ACGTG      | cis-acting element involved in the abscisic acid responsiveness |
| <a href="#">ABRE</a> | Arabidopsis thaliana | 1968     | +      | 5             | ACGTG      | cis-acting element involved in the abscisic acid responsiveness |
| <a href="#">ABRE</a> | Arabidopsis thaliana | 487      | +      | 5             | ACGTG      | cis-acting element involved in the abscisic acid responsiveness |
| <a href="#">ABRE</a> | Arabidopsis thaliana | 1967     | -      | 6             | CACGTG     | cis-acting element involved in the abscisic acid responsiveness |
| <a href="#">ABRE</a> | Arabidopsis thaliana | 1249     | +      | 5             | ACGTG      | cis-acting element involved in the abscisic acid responsiveness |
| <a href="#">ABRE</a> | Arabidopsis thaliana | 127      | -      | 5             | ACGTG      | cis-acting element involved in the abscisic acid responsiveness |
| <a href="#">ABRE</a> | Hordeum vulgare      | 770      | +      | 9             | GCAACGTGTC | cis-acting element involved in the abscisic acid responsiveness |

- + ■ ABRE3a

| Site Name              | Organism | Position | Strand | Matrix score. | sequence | function |
|------------------------|----------|----------|--------|---------------|----------|----------|
| <a href="#">ABRE3a</a> | Zea mays | 13       | -      | 6             | TACGTG   |          |

- + ■ ABRE4

| Site Name             | Organism | Position | Strand | Matrix score. | sequence | function |
|-----------------------|----------|----------|--------|---------------|----------|----------|
| <a href="#">ABRE4</a> | Zea mays | 13       | +      | 6             | CACGTA   |          |

- + ■ AT-rich element
- + ■ CAAT-box
- + ■ CAT-box
- + ■ CGTCA-motif

| Site Name                   | Organism        | Position | Strand | Matrix score. | sequence | function                                                          |
|-----------------------------|-----------------|----------|--------|---------------|----------|-------------------------------------------------------------------|
| <a href="#">CGTCA-motif</a> | Hordeum vulgare | 66       | +      | 5             | CGTCA    | cis-acting regulatory element involved in the MeJA-responsiveness |
| <a href="#">CGTCA-motif</a> | Hordeum vulgare | 1348     | -      | 5             | CGTCA    | cis-acting regulatory element involved in the MeJA-responsiveness |
| <a href="#">CGTCA-motif</a> | Hordeum vulgare | 1247     | -      | 5             | CGTCA    | cis-acting regulatory element involved in the MeJA-responsiveness |
| <a href="#">CGTCA-motif</a> | Hordeum vulgare | 1855     | +      | 5             | CGTCA    | cis-acting regulatory element involved in the MeJA-responsiveness |

- + ■ G-Box
- + ■ G-box
- + ■ GATA-motif
- + ■ GTGGC-motif
- + ■ I-box
- + ■ LTR

| Site Name           | Organism        | Position | Strand | Matrix score. | sequence | function                                                      |
|---------------------|-----------------|----------|--------|---------------|----------|---------------------------------------------------------------|
| <a href="#">LTR</a> | Hordeum vulgare | 368      | +      | 6             | CCGAAA   | cis-acting element involved in low-temperature responsiveness |

- + ■ MBS

| Site Name           | Organism             | Position | Strand | Matrix score. | sequence | function                                          |
|---------------------|----------------------|----------|--------|---------------|----------|---------------------------------------------------|
| <a href="#">MBS</a> | Arabidopsis thaliana | 1936     | +      | 6             | CAACTG   | MYB binding site involved in drought-inducibility |

- + ■ MSA-like
- + ■ MYB
- + ■ MYC
- + ■ Myb
- + ■ O2-site
- + ■ STRE
- + ■ TATA-box
- + ■ TCA-element

| Site Name                   | Organism          | Position | Strand | Matrix score. | sequence   | function                                                     |
|-----------------------------|-------------------|----------|--------|---------------|------------|--------------------------------------------------------------|
| <a href="#">TCA-element</a> | Nicotiana tabacum | 1879     | +      | 9             | CCATCTTTTT | cis-acting element involved in salicylic acid responsiveness |

- + ■ TGACG-motif

| Site Name                   | Organism        | Position | Strand | Matrix score. | sequence | function                                                          |
|-----------------------------|-----------------|----------|--------|---------------|----------|-------------------------------------------------------------------|
| <a href="#">TGACG-motif</a> | Hordeum vulgare | 66       | -      | 5             | TGACG    | cis-acting regulatory element involved in the MeJA-responsiveness |
| <a href="#">TGACG-motif</a> | Hordeum vulgare | 1348     | +      | 5             | TGACG    | cis-acting regulatory element involved in the MeJA-responsiveness |
| <a href="#">TGACG-motif</a> | Hordeum vulgare | 1247     | +      | 5             | TGACG    | cis-acting regulatory element involved in the MeJA-responsiveness |
| <a href="#">TGACG-motif</a> | Hordeum vulgare | 1855     | -      | 5             | TGACG    | cis-acting regulatory element involved in the MeJA-responsiveness |

- + ■ Unnamed\_1
- + ■ Unnamed\_4
- + ■ W box

```

+ ACCTTGCTTT TGCTCTATA TCTGAACCCA AGAAAGTCGA AGAAGCCTTC ATGGAACCTG AATGGACTCA
- TGAAACGAAA ACAGAGATAT AGACTTGGGT TCTTTCAGCT TCTTCGGAAG TACCTTGGAC TTACCTGAGT

+ AGCTATGCAA GAAGAGCTTC AATAGTTTGA CCTGAATAAT GTCTGGGAGC TTGTCAAACG TCCTGATCCT
- TCGATACGTT CTTCTCGAAG TTATCAAACCT GGACTTATTA CAGACCCTCG AACAGTTTGC AGGACTAGGA

+ TGCAAGCACA ATGGCATTGG CACGAAATGG ATCTATCGCA ACAAGCAAGA TGAACCTGGA CAAGTTGTCA
- ACGTTCTGTG TACCGTAACC GTGCTTTACC TAGATAGCGT TGTTCTGTTCT ACTTGAACCT GTTCAACAGT

+ GAAGCAGAGC TCGCCTTGT GCTCAAGGTT ACACACAACT GGAAGGAATA GACTTCGCTG AAACCTTTGC
- CTTCTGCTCG AGCGGAACAA CGAGTTCCAA TGTGTGTTCA CCTTCCTTAT CTGAAGCGAC TTTGGAACG

+ TCCTGTGGCT CGGCTTGAAG CCATTCGCAT ACTACTGGCT TATGCAAAACC ATCACAACAT TCTTCTGTAT
- AGGACACCGA GCCGAACCTC GGTAAGCGTA TGATGACCGA ATACGTTTGG TAGTGTGTA AGAAGACATA

+ CAAATGGAGC TGAAGAGTGC CTTTTTCAAT GGCAAAATCG AAGAAGTGTG TGTCACCTCA CAGCCTGGTT
- GTTTACCTGC ACTTCTCAGC GAAAAAGTTA CCGTTTTAGC TTTCTCACAT ACAGTGTGTT GTCGGACCAA

+ TTGAAGATCC TAAGCATCCC GATATGGTGT ACAAGCTCAA CAAGGCATTG CATGGCCTCC AACAAGCACC
- AACTTCTAGG ATTCTGATGG CTATACCACA TGTTCGAGTT GTTCCGTAAC GTACCGGAGG TTGTTCTGTG

+ TCGGTCTTGG TATGACAGC TGAAGGAATT CCTGAAGAGC AAAGGCTTCA AACCTGGTTC ACTAGATCCC
- AGCCAGAAC ATACTGTCTG ACTTCTTAA GGACTTCTCG TTTCCGAAGT TTGGACCAAG TGATCTAGGG

+ ATTCTCTTCA CGAATACATA TGATGGTGAA CTATTTATGT GTCAAATA TACGTTGATGAC ATTATCTTTG
- TAAGAGAAGT GCTTATGTAT ACTACCACCT GATAAATACA CAGTTTATAT GCACCTACTG TAATAGAAAC

+ GATGCACTGG TAAGAGATAC AGTACGAGT TTTGATACAT GATGCAAGAG CAATATCAGA TGCCATGAT
- CTACGTGACC ATTCTCTATG TCACTGCTCA AACCTATGTA CTACGTTCTC GTTATAGTCT ACAGGTACTA

+ GGAGGAGCTG AAATCTTCC TTGGTCTTCA AATCGTCAA CAAGCAATG TCATCTTCAI ATCGCAAGAA
- CCTCCTCGAC TTTAAGAAGG AACCAAGAT TTAGCCAGTT GTTGCCTTAC AGTAGAAGTA TAGCGTCTTT

+ AAATACCTTA AAGATTGCCT GAAAAAGTTT GGAATGCAAG ACTGCAAAGG GTACATGATG CCAATGCCAA
- TTTATGGAAT TTCTAACGGA CTTTTTCAAA CCTTACGTTT TGACGTTTCC CATGTACTAC GGTACGGTT

+ CCAAAGTCA TCTCGGACCT GACACCAATG GTAAAGAGTT CGATCAAAGG GTATACTGCT CCATGATTGG
- GGTTTTCACT AGAGCCTGGA CTGTGGTTAC CATTTCTCAA GCTAGTTTTC CATATGACGA GGTACTAACC

+ TTATTTGCTC TATTTATGTG CATCTAGGCC TGATATTATG CTTAGCATTT GCATGTGTGC CCAATCCAA
- AATAAACGAG ATAAATACAC GTAGATCCGG ACTATAATAC GAATCGTAAA CGTACACACG GGTAAAGGTT

+ GCGGCACCAA AGGAGTCACA TCACCTAGCG GTGAAGCGAA TACTTAGATA TTTGGCTCAC ACCCAACAC
- CGCCGTGGTT TCCTCAGTGT AGTGGATCGC CACTTCGCTT ATGAATCTAT AAACCGAGTG TGGGTTGTG

+ TAGGATTATG GTATCCAAAN NNNNNNNNNN NNNNNNNNNN NNNNNNNNNN NNNNNNNNNN NNNNNNNNNN
- ATCCTAATAC CATAGGTTTN NNNNNNNNNN NNNNNNNNNN NNNNNNNNNN NNNNNNNNNN NNNNNNNNNN

+ NNNNNNNNNN NNNNNNNNNN NNNNNNNNNN NNNNNNNNNN NNNNNNNNNN GCTGAACGTG TGCTGAACCTC
- NNNNNNNNNN NNNNNNNNNN NNNNNNNNNN NNNNNNNNNN NNNNNNNNNN CGACTTGCAC ACGACTTGG

+ GGAGGTGCCG TACGTTGAT ACTTGGATCG GTCGGATCGT GAAGACGTAC AACTATATCA ACCGCGTTGT
- CCTCCACGGC ATGCAAGCTA TGAACCTAGC CAGCCTAGCA CTTCTGCATG TTGATATAGT TGGCGCAACA

+ CATAACGCTT CCCCTTACGG TCTACGAGG TACATGGACA ATACTCTCCC CTCTCGTTGC TATGCATCAC
- GTATTGCGAA GGGGAATGCC AGATGCTCCC ATGTACCTGT TATGAGAGGG GAGAGCAACG ATACGTAGTG

+ CATGATCTTG CGTGTGCGTA GGAATTTTTT TGAAATTACT ACGTTCCCA ACAATCCCAT CCCATCCACC
- GTACTAGAAC GCACACGAT CTTTAAAAA ACTTTAATGA TGCAAGGGGT TGTTAGGGTA GGTAGGTGG

+ ACGTGCACGG TCGACGGAAG AGCAGGCTC CAAACCTCG CCTTTGAGA TCGTGTATGG GAGAGGTGCG
- TGACAGTGCC AACTGCCTTC TCGTCCGGAG GTTTTGGAGC GGAGAACTCT AGCACATACC CTCTCCACGC

+ ATTAGGTTTT TGAGGAGCGT TCCCGGGTGC CCCTACACCC TCATGAACAG TAAATGAAGT AGACAAACGT
- TAATCCAAA ACTCCTCGCA AGGGCCACG GGGATGTGGG AGTACTTGTG ATTTACTTCA TCTGTTTGA

+ AGATGAAGTA TTGAAAGGT GAAGGCGATG TTTGTCTACT TCATCTACAT TGTGCTGCGC TTCACCGAGT
- TCTACTTCAI AACCTTTCCA CTTCCGCTAC AAACAGATGA AGTAGATGTA ACAGCAGCGG AAGTGGCTCA

+ ATTGAAAGG TGTAACAGTT CCCGGGTGCC CCTACACCTT CATGAACAGT AAATTATGTA TTATTTAATT
- TAACCTTTC ACATTTGTC GGGCCACGG GGATGTGGGA GTACTTGTCA TTTAATACAT AATAAATTAA

+ TGATTACATC TAGTATGTAT AATTCACCAA CTGTCTTCCG TAAAAGAAC CATTAATCTC AGGTGTTATG
- ACTAAGTATG ATCATAACATA TTAGTGGTT GACAGAAGGC ATTTTCTTTG GTAATTAGAG TCCACAATAC

+ GCATCTCGAT GGAAAGTAC TTTCTACTA AGAGCACCTT GTGATGAGAA TATCATCCTT TTTCTTACT
- CGTAGAGCTA CTTTTCATG AAAGGATGAT TCTCGTGAA CACTACTCTT ATAGTAGGAA AAAAGGATGA

+ AACATAAGAG ATGATGAGCA GTCAGCATCA CATGGTAGCT AAGCAGCTTT ATCGTGCCTT GATAGAGAAA
- TTGATTTCTC TACTACTCGT CAGTCGTAGT GTACCATCGA TTCGTCGAAA TAGCAGCGGA CTATCTCTT

+ AGGCGACGAC GCCCTTTTAC TTAGCCGTGT CGCCCTTTTT TGCTTTCACA GGTTCAGATC CAAGTGTCT
- TCCGCTGCTG CGGAAAAATG AATCGGCACA CGGGAAAAA ACGAAAGTGT CCAAGTTCAG GTTCACAAGA

+ CACTACCAA AACCTGAAG AGTGTACGTA CGTCCCT
- GTGAGTGGTT TTGACTTCC TCACATGCAT GCACGGGA

```

Motifs Found

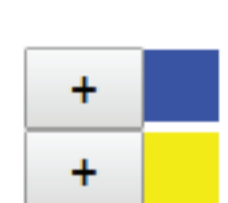

ABRE

| Site Name | Organism             | Position | Strand | Matrix score. | sequence    | function                                                        |
|-----------|----------------------|----------|--------|---------------|-------------|-----------------------------------------------------------------|
| ABRE      | Arabidopsis thaliana | 1400     | -      | 6             | CACGTG      | cis-acting element involved in the abscisic acid responsiveness |
| ABRE      | Hordeum vulgare      | 1983     | -      | 9             | CGTACGTGCA  | cis-acting element involved in the abscisic acid responsiveness |
| ABRE      | Arabidopsis thaliana | 610      | +      | 5             | ACGTG       | cis-acting element involved in the abscisic acid responsiveness |
| ABRE      | Hordeum vulgare      | 1987     | +      | 9             | CGTACGTGCA  | cis-acting element involved in the abscisic acid responsiveness |
| ABRE      | Arabidopsis thaliana | 1176     | +      | 5             | ACGTG       | cis-acting element involved in the abscisic acid responsiveness |
| ABRE      | Oryza sativa         | 1986     | -      | 10            | GACACGTACGT | cis-acting element involved in the abscisic acid responsiveness |
| ABRE      | Arabidopsis thaliana | 1401     | +      | 5             | ACGTG       | cis-acting element involved in the abscisic acid responsiveness |
| ABRE      | Arabidopsis thaliana | 1990     | +      | 5             | ACGTG       | cis-acting element involved in the abscisic acid responsiveness |
| ABRE      | Arabidopsis thaliana | 358      | +      | 5             | ACGTG       | cis-acting element involved in the abscisic acid responsiveness |
| ABRE      | Arabidopsis thaliana | 1276     | +      | 7             | TACGGTC     | cis-acting element involved in the abscisic acid responsiveness |

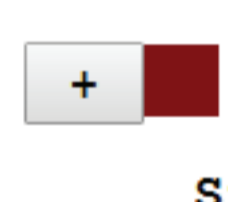

ABRE3a

| Site Name | Organism | Position | Strand | Matrix score. | sequence | function |
|-----------|----------|----------|--------|---------------|----------|----------|
| ABRE3a    | Zea mays | 609      | +      | 6             | TACGTG   |          |
| ABRE3a    | Zea mays | 1989     | +      | 6             | TACGTG   |          |

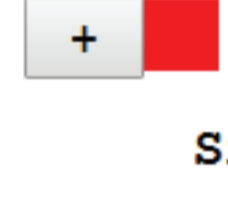

ABRE4

| Site Name | Organism | Position | Strand | Matrix score. | sequence | function |
|-----------|----------|----------|--------|---------------|----------|----------|
| ABRE4     | Zea mays | 609      | -      | 6             | CACGTA   |          |
| ABRE4     | Zea mays | 1989     | -      | 6             | CACGTA   |          |

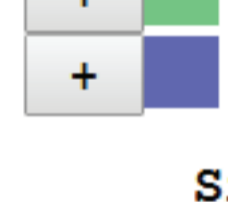

AC-I

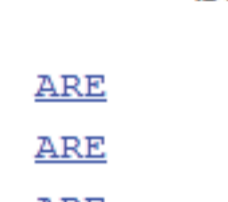

ARE

| Site Name | Organism | Position | Strand | Matrix score. | sequence | function                                                               |
|-----------|----------|----------|--------|---------------|----------|------------------------------------------------------------------------|
| ARE       | Zea mays | 326      | +      | 6             | AAACCA   | cis-acting regulatory element essential for the anaerobic inducibility |
| ARE       | Zea mays | 1727     | +      | 6             | AAACCA   | cis-acting regulatory element essential for the anaerobic inducibility |
| ARE       | Zea mays | 416      | -      | 6             | AAACCA   | cis-acting regulatory element essential for the anaerobic inducibility |

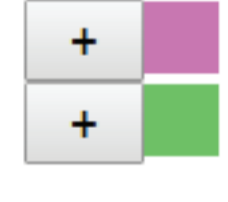

Box 4

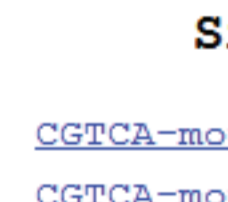

CAAT-box

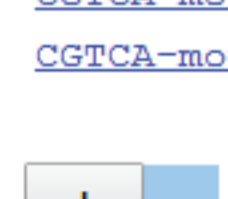

CGTCA-motif

| Site Name   | Organism        | Position | Strand | Matrix score. | sequence | function                                                          |
|-------------|-----------------|----------|--------|---------------|----------|-------------------------------------------------------------------|
| CGTCA-motif | Hordeum vulgare | 653      | -      | 5             | CGTCA    | cis-acting regulatory element involved in the MeJA-responsiveness |
| CGTCA-motif | Hordeum vulgare | 1412     | -      | 5             | CGTCA    | cis-acting regulatory element involved in the MeJA-responsiveness |
| CGTCA-motif | Hordeum vulgare | 735      | +      | 5             | CGTCA    | cis-acting regulatory element involved in the MeJA-responsiveness |

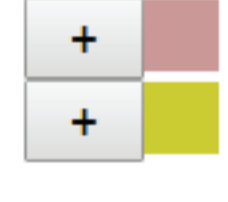

G-Box

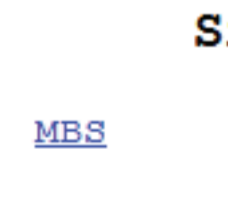

G-box

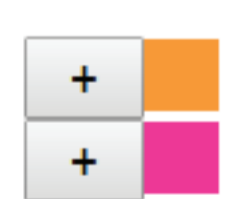

GATA-motif

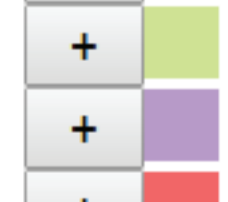

MBS

| Site Name | Organism             | Position | Strand | Matrix score. | sequence | function                                          |
|-----------|----------------------|----------|--------|---------------|----------|---------------------------------------------------|
| MBS       | Arabidopsis thaliana | 1708     | +      | 6             | CAACTG   | MYB binding site involved in drought-inducibility |

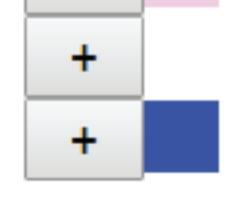

MRE

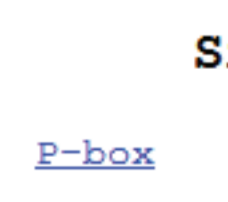

MYB

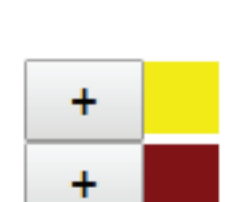

MYB-like sequence

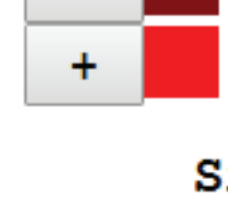

MYC

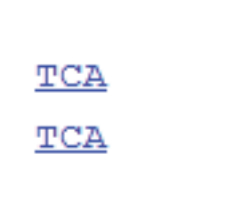

Myb

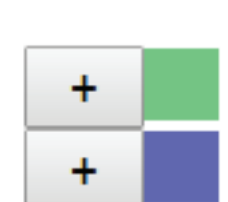

Myb-binding site

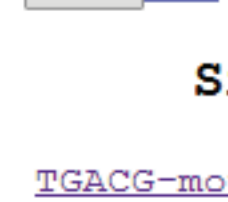

Myc

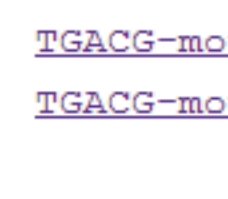

O2-site

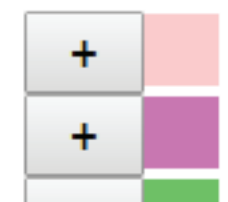

P-box

| Site Name | Organism     | Position | Strand | Matrix score. | sequence | function                       |
|-----------|--------------|----------|--------|---------------|----------|--------------------------------|
| P-box     | Oryza sativa | 885      | -      | 7             | CCTTTTG  | gibberellin-responsive element |

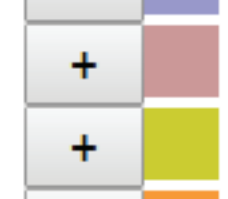

STRE

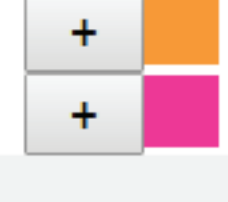

TATA-box

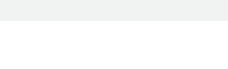

TCA

| Site Name | Organism      | Position | Strand | Matrix score. | sequence   | function |
|-----------|---------------|----------|--------|---------------|------------|----------|
| TCA       | Pisum sativum | 751      | +      | 10            | TCATCTTCAT |          |
| TCA       | Pisum sativum | 1581     | +      | 9             | TCATCTTCAT |          |



TCT-motif



TGACG-motif

| Site Name   | Organism        | Position | Strand | Matrix score. | sequence | function                                                          |
|-------------|-----------------|----------|--------|---------------|----------|-------------------------------------------------------------------|
| TGACG-motif | Hordeum vulgare | 653      | +      | 5             | TGACG    | cis-acting regulatory element involved in the MeJA-responsiveness |
| TGACG-motif | Hordeum vulgare | 1412     | +      | 5             | TGACG    | cis-acting regulatory element involved in the MeJA-responsiveness |
| TGACG-motif | Hordeum vulgare | 735      | -      | 5             | TGACG    | cis-acting regulatory element involved in the MeJA-responsiveness |



Unnamed\_1



Unnamed\_10



Unnamed\_12



Unnamed\_14



Unnamed\_4



Unnamed\_8



W box



WUN-motif



as-1

>Traes\_2BS\_40C683B47.1

```

+ TGCTCAAATT TGCCCATGAA ATCACGAGCA GTATAGGTTG CACTGCTTGG CTCTCGTCGT CTAGTATACA
- ACGAGTTTAA ACGGGTACTT TAGTGCTCGT CATATCCAAC GTGACGAACC GAGAGCAGCA GATCATATGT

+ TGTCATAAGG GTATTTTGGG TAGAAAAAGT TTATGCCGGT CCGCCAGGCG AAGGCCATCT ATGGCCGGATC
- ACAGTATTCC CATAAAACCC ATCTTTTTCA AATACGGCCA GGCGGTCCGC TTCCGGTAGA TACCGCCTAG

+ AAGAGGCTGC AGAGCTAGGC CTCTCTTCCCT CGCCATCTAT GTTACGTTGT ACTCTCCAGT CTCTCCCTCC
- TTCTCCGACG TCTCGATCCG GAGAGAAGGA GCGGTAGATA CAATGCAACA TGAGAGGTCA GAGAGGGAGG

+ CTCCCTCCTC CTCTTCTCCT CACCACGAGG AGCCCAGAGG GGACTCGCCG CCCAGGACGC CACTACTCCC
- GAGGGAGGAG GAGAAGGAGG GTGGTGCTCC TCGGGCTCCT CCTGAGCGGC GGGTCTTGGC GTGATGAGGG

+ CAGGGACCTG ACGTGTTC A GGACCGGTCG GCACTCACTC GTGACTGTCT TTGCCTCGTC TTCGTCTCCA
- GTCCCTGGAC TGCACAAAGT CCTGGCCAGC CGTGAGTGAG CACTGACGAG AACGGAGCAG AAGCAGAGGT

+ CGGAGGTCCC TGCCAGCGTC CCGCCGGAGC CGTGCACCCG TCTACTCCGG CGACCTCCCC TCCGGAAGCG
- GCCTCCAGGG ACGGTCCGAG GCGCGCCTCG GCACGTGGGC AGATGAGGCC GCTGGAGGGG AGGCCCTCCG

+ CGTGCAGCCT CAACCCGACT GGTCAAATGA AGCTGCAGGA CCTCCGAACC CACGTCCAGG AATTCTTGAC
- GCACGTCGGA GTTGGGCTGA CCAGTTTACT TCGACGTCTT GGAGGCTTGG GTGCAGGTC TTAAGAACTG

+ ATCCCATGGC TTCCAAGTTC CAACGAACGC CTGCTCATCC GCTACAGCCG CCCGGTTGGG CTGGGCAGAC
- TAGGTACCG AAGGTTCAAG GTTGTCTGCG GACGAGTAGG CGATGTCGGC GGGCCAACCC GACCCGTCTG

+ GAGACCATGG CTCCCTTAAT TTTTAAACGA AGAATGTCTA TCCTACCTCA GAAATTCATG GTTCAGATTT
- CTCTGGTACC GAGGGAATTA AAAATTTGCT TCTTACAGAT AGGATGGAGT CTTTAAGTTA CCAGTCTAAA

+ TAATATACTG CTCCCTCCCC TGTCAGCAGT ATAGGGTACT GTAAAAACGC ACTTAGAAGA AGCTTAGCTC
- ATTTATATGAC GAGGGAGGGG ACAGTCGTCA TATCCCATGA CATTTTTGGC TGAATCTTCT TCGAATCGAG

+ TCACCTTAGA GTGGTCCAAA TGACCCCTCT GCTCGATCAT TGCATTGAT GTTATCGCTA TGCCTAGCCT
- AGTGAATCT CACCAGGTTT ACTGGGGAGA CGAGTAGTA ACGTGAAC TAATAGCGAT ACGGATCGGA

+ TGATFGATCC ATGCGTGGTC ACTTGTCTGT AGAGATCAGA TAGCTACTTC AAGGTCGTGA GTTTATCCTT
- ACTAACTAGG TACGCACCAG TGAACGACAA TCTCTAGTCT ATCGATGAAG TTCCAGCACT CAAATAGGAA

+ CGGAAGATTA GTCGTGAATA GAACAGGGTT TATGGTAGAT CCCATGGTTG TGCCTCATGT TGGTTGCACC
- GCCTTCTAAT CAGCACTTAT CTTGTCCCAA ATACCATCTA GGGTACCAAC ACGGAGTACA ACCAACGTGG

+ ATACACGGCT CAGGGTAGCC GATTGTAACC CTATTATATA GAGGAATAAA ACTCGCAACT TTCTTGAAAA
- TATGTGCCGA GTCCCATCCG CTAACATTGG GATAATATAT CTCCCTATTT TGAGCGTTGA AAGAACTTTT

+ ATAAGTCTGT TTCAGGAATC CAAATCCAAC CAGCAATTCG TCGGCTTGTG CGAAAAAAA ACCAATAAATT
- TATTCAGACA AAGTCCCTTAG GTTTAGGTTG GTCGTTAAGC AGCCGAAACA GCTTTTTTTT TGGTTATTAA

+ CGTCGGAGGC ATGGAAGCCA AAGAAACTGC GTCCAGCCTA CAGATCGGGC CACGTTACGG CCGGCCTAAA
- GCAGCCTCCG TACCTTCGGT TTCTTTGACG CAGGTCGGAT GTCTAGCCCG GTGCAATGCC GGCCGGATTT

+ CGCCCGTCGG TGCTGGCCTA CGGCTGTGCG GCCTCGGTCC AGCCTCACTA TTCCACCGT GCGTTTGATA
- GCGGGCAGCC ACGACCGGAT GCCGACACGC CGGAGCCAGG TCGGAGTGAT AAGGGTGGCA CGCAAACCTAT

+ AGGCTCAACC GCTCAAGGCA GCCTTACTAC CTCCGTCTTT AAAAAAGTAT ACTTTCAACT TCATTTGAAGG
- TCCGAGTTGG CGAGTTCCGT CGGAATGATG GAGGCAAGAA TTTTTCATA TGAAAGTTGA AGTAACTTCC

+ GTCAAACCTAC TCAAAGTTTG ACCGAGTTTG TGCAAAGTA TATCAATGTT TACA AAACCA AATAGGTGTA
- CAGTTTGATG AGTTTCAAAC TGGCTCAAAC ACGTTTTCAT ATAGTTACAA ATGTTTGGT TTATCCACAT

+ TGATAAAAAAT ATATATATAT ATGAATTTAA TACTACTAAT TTGATGTCAT AAATGTTGT ATATTACTAT
- ACTATTTTTA TATAATATAG TACTTAAAT ATGATGATTA AACTACAGTA TTTACAAACA TATAATGATA

+ ATAAATGCAG TCAAACATAA AAAATTTGAA TTTTCAACAA AGTTGAAGGC ACACCTTTTC AAAAACGAAT
- TATTTACGTC AGTTTGTAT TTTTAAACTT AAAAGTTGTT TCAACTTCCG TGTGAGAAAG TTTTGGCTTA

+ GGAGTACCTC TCAATGTCCC AGCTACCGAA TTGTCCGTGT TGGCGGAAGG CGACGGGAGC GCAAGATGGC
- CCTCATGGAG AGTTACAGGG TCGATGGCTT AACAGGCACA ACCGCCCTCC GCTGCCCTCG CGTTCTACCG

+ TGCGCACCGG TCAAACAGAG CGTGAATCGC CTTGGAACAA CGCCGACTCC CCACTACTAT TCGCACGTAA
- ACGCGTGGCC AGTTTGGCTC GCACCTAGCG GAACCTTGTG GCGGCTGAGG GGTGATGATA AGCGTGCATT

+ GGCCAAACGG TTGATGTTCA CGCACACATG GCTCCAGGCG TTCGCTAGCA TGGAAGTGGT GAAAAAAGAG
- CCGGTTTGGC AACTACAAGT GCGTGTGTAC CGAGGTCCGC AAGCGATCGT ACCTTCACCA CTTTTTCTC

+ AGATCGTTCA ATGTTTGGCC GATTTTGGC TGATAAACGC CAAGAGAGAT CGCTCAAGTT GGCCCTGTTG
- TCTAGCAAGT TACAAAACGG CTAAAAACGC ACTATTTGCG GTTCTCTCTA GCGAGTTCAA CCGGGACAAC

+ CAAGGAAAAT TCAGGTGTTG GTGTTGGCGG TAGCGGCTCA AGCTGGAAGC TGCCACGAAT ACGCCAAGCT
- GTTCTTTTAA AGTCCACAAC CACAACCGCC ATCGCCGAGT TCGACCTTCG ACGGTGCTTA TGCGGTTCCG

+ GGAAGCTCGA AGTATACCCA ATCGAACGCG AGTCAGAGAC TAACGTTGGA CTAATGGGAC CTAATTTTGG
- CCTTCGAGCT TCATATGGGT TAGCTTGGCG TCAGTCTCTG ATTGCAACCT GATTACCCTG GATTTAAAAC

+ GATGAGCTAT CGCTAGTCGG AGACTGGAGC GATCTGAAGG TGCACGTGAG CTAATCTTT GGCTATAAAT
- CTACTCGATA GCGATCAGCC TCTGACCTCG CTAGACTTCC ACGTGCACCTC GATTTAGAAA CCGATATTTA

+ ATGCATGCGA TGCACCCTC TCTTGACAA GCCACTAA
- TACGTACGCT ACGTGGTGAG AGAACGTGTT CGGTGATT

```

Motifs Found

| Site Name               | Organism             | Position | Strand | Matrix score. | sequence   | function                                                        |
|-------------------------|----------------------|----------|--------|---------------|------------|-----------------------------------------------------------------|
| <b>ABRE</b>             |                      |          |        |               |            |                                                                 |
| ABRE                    | Arabidopsis thaliana | 1101     | -      | 5             | ACGTG      | cis-acting element involved in the abscisic acid responsiveness |
| ABRE                    | Arabidopsis thaliana | 1933     | -      | 6             | CACGTG     | cis-acting element involved in the abscisic acid responsiveness |
| ABRE                    | Arabidopsis thaliana | 471      | -      | 5             | ACGTG      | cis-acting element involved in the abscisic acid responsiveness |
| ABRE                    | Arabidopsis thaliana | 1934     | +      | 5             | ACGTG      | cis-acting element involved in the abscisic acid responsiveness |
| ABRE                    | Arabidopsis thaliana | 1604     | -      | 5             | ACGTG      | cis-acting element involved in the abscisic acid responsiveness |
| ABRE                    | Arabidopsis thaliana | 291      | +      | 5             | ACGTG      | cis-acting element involved in the abscisic acid responsiveness |
| <b>ABRE3a</b>           |                      |          |        |               |            |                                                                 |
| ABRE3a                  | Zea mays             | 1604     | -      | 6             | TACGTG     |                                                                 |
| <b>ABRE4</b>            |                      |          |        |               |            |                                                                 |
| ABRE4                   | Zea mays             | 1604     | +      | 6             | CACGTA     |                                                                 |
| <b>ARE</b>              |                      |          |        |               |            |                                                                 |
| ARE                     | Zea mays             | 1039     | +      | 6             | AAACCA     | cis-acting regulatory element essential for the anaerobic induc |
| ARE                     | Zea mays             | 1315     | +      | 6             | AAACCA     | cis-acting regulatory element essential for the anaerobic induc |
| <b>AT~TATA-box</b>      |                      |          |        |               |            |                                                                 |
| <b>CAAT-box</b>         |                      |          |        |               |            |                                                                 |
| <b>CAT-box</b>          |                      |          |        |               |            |                                                                 |
| <b>CGTCA-motif</b>      |                      |          |        |               |            |                                                                 |
| CGTCA-motif             | Hordeum vulgare      | 289      | -      | 5             | CGTCA      | cis-acting regulatory element involved in the MeJA-responsive   |
| <b>DRE core</b>         |                      |          |        |               |            |                                                                 |
| <b>G-Box</b>            |                      |          |        |               |            |                                                                 |
| <b>G-box</b>            |                      |          |        |               |            |                                                                 |
| <b>MYB</b>              |                      |          |        |               |            |                                                                 |
| <b>MYC</b>              |                      |          |        |               |            |                                                                 |
| <b>Myb-binding site</b> |                      |          |        |               |            |                                                                 |
| <b>STRE</b>             |                      |          |        |               |            |                                                                 |
| <b>Sp1</b>              |                      |          |        |               |            |                                                                 |
| <b>TATA-box</b>         |                      |          |        |               |            |                                                                 |
| <b>TCA</b>              |                      |          |        |               |            |                                                                 |
| TCA                     | Pisum sativum        | 1245     | +      | 9             | TCATCTTCAT |                                                                 |
| <b>TCCC-motif</b>       |                      |          |        |               |            |                                                                 |
| <b>TGACG-motif</b>      |                      |          |        |               |            |                                                                 |
| TGACG-motif             | Hordeum vulgare      | 289      | +      | 5             | TGACG      | cis-acting regulatory element involved in the MeJA-responsive   |
| <b>Unnamed_1</b>        |                      |          |        |               |            |                                                                 |
| <b>Unnamed_4</b>        |                      |          |        |               |            |                                                                 |
| <b>W box</b>            |                      |          |        |               |            |                                                                 |
| <b>as-1</b>             |                      |          |        |               |            |                                                                 |

>Traes\_6AS\_5BAD56BB6.1

```

+ CCCCGGTGAT TGTAAAAAAT GATCTATTG CATGTAGTTA CACACTTAAA TCAGGACTTG GCCCTTTCAT
- GGGGCCACTA ACAATTTTTA CTAGATAAAC GTACATCAAT GTGTGAATTT AGTCCTGAAC CGGGAAAAGTA

+ GTATGTCATG TTGTCAAATT AATATGTTGA AAGAATGTTA TATTTTCCAC AAAGGTAAAT GAAATAATGT
- CATAAGTAC AACAGTTTAA TTATACAAC TTCTTACAAT ATAAAAGGTG TTTCATTTA CTTTATTACA

+ TTATGTGCAG AAACATAGTT CTTAGCTATA TTCAAAACAT GTATTGTTCT CGATCCCTTT TCAGTCCAAC
- AATACACGTC TTTGTATCAA GAATCGATAT AAGTTTTGTA CATAACAAGA GCTAGGGAAA AGTCAGGTTG

+ ATCTTATGTC AAGCATGTAC TCTATATGTA CCTCTATCGG TGCATCAAGC ACTATTTGGC CCTTGGGGTG
- TAGAATACAG TTCGTACATG AGATATACAT GGAGATAGCC ACGTAGTTCG TGATAAACCG GGAACCCAC

+ CTTAGGTATG TGAAAAGAGG GTTGGAGTTG ACTAGGTGAT GTGGCAACCG CGGTGGTATA ACTAGGTTCT
- GAATCCATAC ACCTTCTCC CAACCTCAAC TGATCCACTA CACCGTTGGC GCCACCATAT TGATCCAAGA

+ CACTAAGGAG TACTACTCTA ACCAAAGATG TCACAAGAAC GGTTCATGGT GGTTCAAATT CCAAATTTGA
- GTGATTCCTC ATAGTGAGAT TGGTTTCTAC AGTGTCTTG CCAAGTACCA CCAAGTTTAA GGTTTAAACT

+ TACCAGATAA ATGAAACAAC TTTTACTGCT TTCATCTTTG TATGTCTCAA TAGAGGTTCA TGGTGGCGTT
- ATGGTCTATT TACTTTGTTG AAAATGACGA AAGTAGAAAC ATACAGAGTT ATCTCCAAGT ACCACCGCAA

+ CAATGAAGGT TTTATTTCCC ACAATCGAGG ATTCAATTAG TAAGGTGGTT TCAAAGAAGT TGTATATGGT
- GTTACTTCCA AAATAAAGGG TGTTAGCTCC TAAGTTAATC ATTCCACCAA AGTTTCTTCA ACATATACCA

+ TTTGTGTTTG CCTCCTTTTG AAGAGTTTCA TGGGTGTTAC AGTGATTTTT AGGAAGTCTA TTAGAAGATT
- AAACACAAC GGAGGAAAAC TTCTCAAAGT ACCCACAAATG TCACATAAAA TCCTTCAGAT AATCTTCTAA

+ GGAATAGTTG GAGAGATTGT TAAAGGGATC CCCCTTTTTT CCTTTGTTTT AATGAAGTTT CCGGGAAGTT
- CCTTATCAAC CTCTCTAACA ATTTCCCTAG GGGGAAAAAA GGAAACAAAA TTACTTCAA GGCCCTTCAA

+ CGAAATATCT CATCTGAATT CAATAGAAGA CATACTATTG AATTTAGCTG ACCTATGGCA ACATTAATTC
- GCTTTATAGA GTAGACTTAA GTTATCTTCT GTATGATAAC TTAAATCGAC TGGATACCGT TGTAAATTAAG

+ ACCTCTCATC CCGCAAACAA AATTAACAC TTGCCTCCTA GGGAGAGGAT TTGTGGCATG CAAGTGGGG
- TGGAGAGTAG GCGGTTTGT TTAATTTGTG AACGGAGGAT CCCTCTCCTA AACACCGTAC GTTCACGCCC

+ CGCACGCATG TCCCTCGTGT CCGCTTTTTA TTTTGGCTTC TGATTTTCAA AGTTTTATGT CTTTAAATG
- GCGTGCCTAC AGGGAGCACA GCGGAAAAAT AAAACCGAAG ACTAAAAGTT TCAAATACA GAAAATTTAC

+ AAAATTCCAA ACTAAGTCT GTTTTCATAT TCATGCTTCT CGTGACCAAC ACTTTCAAAT AAGATCCATT
- TTTAAGGTT TGATTCAAGA CAAAAGTATA AGTACGAAGA GCACGTGTTG TGAAAGTTA TTCTAGGTAA

+ TTGAATATAT TTCCATGACT TTTTTTTTAA ATGTTAAGTT TCAATGTTGA TACTTAGTAC GAGTGATCGA
- AACTTATATA AAGTACTGA AAAAAAATT TACAATTCAA AGTTACAAC ATGAATCATG CTCACTAGCT

+ TAAAAATCAA TTATTTTGTG TCTAGGACCG ATGGAAAAAT TACTTGAAAT TATATATCTA AAATGATTG
- ATTTTTAGTT AATAAACAC AGATCCTGGC TACCTTTTTA ATGAACTTA ATATATAGAT TTTAATAAC

+ AAACCTGACT GGTTAGATG CAAAACTAT AAGTTTTGTT GTGGAACTT AAAACTTTTT GAGGGATTTT
- TTTGAAGTGA CCAATCTAC GTTTTTGATA TTCAAACAA CACCTTTGAA TTTGAAAAA CTCCTAAAA

+ CTATTTTACT GTGCCCTCAT GTGGATTGA ACTACTGCGC GAATCGCGGG GCAAACCGAG CGGGCAGTAG
- GATAAATGA CACGGGAGTA CACCCTAACT TGATGACGCG CTTAGCGCCC CGTTTGGCTC GCCCGTCATC

+ GACTTGGCAG GTGAGTCCG CGCACTC ACGTCTCCTGCG CATTTCGTT ACCTCCACT ATGAATGCAC
- CTGAACCGTC CACTCACGGC GCGTGAATG CAGGACGC GTAAAGGCAA TGGAGGGTGA TACTTACGTG

+ TTGGAACACT CCTCTGATGG TTCTTTAATT ATGTTTTTTC TATTTCTTTA TCTTTGTTG CCTGGAATAG
- AACCTTGTA GGAGACTACC AAGAAATTA TACAAAAAAG ATAAGAAAAT AGAAACAAAC GGACCTTATC

+ TTGCCATCAT GACTTGATCA CATATCCTTC TCCGGTCCCA TGTCCTATCA GCAATTACAT AAAATTAGTT
- AACGGTAGTA CTGAAGTAGT GTATAGGAAG AGGCCAGGT ACAGGATAGT CGTTAATGTA TTTAATCAA

+ TGCTGAAGAT GATCTTTATC CATAAGATC GACAACCACA CACTAAATTA TTTATACATA ATTTCTTATA
- ACCTTCTA CTAGAAATAG GTATTTCTAG CTGTTGGTGT GTGATTTAAT AAATATGTAT TAAAGAATAT

+ TATACTGGAA TGCCATTTGG CAGTGACAGA TGAGCAACAT ATATATAAAT AAAGACAGAT CAGTTTTTGG
- ATATGACCTT ACGGTAAACC GTCACGTCT ACTCGTTGTA TATATATTTA TTCTGTCTA GTCAAAAACC

+ CATCTACAGA GAGATGCGTT GCTCTTAGTC AACCAGAGAA AGATACC ACGTGAAGTGT CATAGTTCTC
- GTAGATGTCT CTCTACGCAA CGAGAATCAG TTGGTCTCT TCTATGGTGC ACCTTGAACA GTATCAAGAG

+ CACAACCCTA ACGGCCTAAC TTTGACCAAT CTACATGCAT CTCATGCAAC TGAAAGAAGA GTGCTATTAT
- GTGTTGGGAT TGCCGATTG AAACCTGGTTA GATGTACGTA GAGTACGTTG ACTTCTTCT CACGATAATA

+ AAAT
- TTTA

```

Motifs Found

- + AAGAA-motif
- + ABRE

| Site Name            | Organism             | Position | Strand | Matrix score. | sequence | function                                                    |
|----------------------|----------------------|----------|--------|---------------|----------|-------------------------------------------------------------|
| <a href="#">ABRE</a> | Arabidopsis thaliana | 1287     | -      | 6             | CACGTG   | cis-acting element involved in the abscisic acid responsive |
| <a href="#">ABRE</a> | Arabidopsis thaliana | 1657     | -      | 6             | CACGTG   | cis-acting element involved in the abscisic acid responsive |
| <a href="#">ABRE</a> | Arabidopsis thaliana | 1288     | +      | 5             | ACGTG    | cis-acting element involved in the abscisic acid responsive |
| <a href="#">ABRE</a> | Arabidopsis thaliana | 1658     | +      | 5             | ACGTG    | cis-acting element involved in the abscisic acid responsive |

- + ABRE2

| Site Name             | Organism | Position | Strand | Matrix score. | sequence | function |
|-----------------------|----------|----------|--------|---------------|----------|----------|
| <a href="#">ABRE2</a> | Zea mays | 1656     | -      | 8             | CCACGTGG |          |

- + ARE

| Site Name           | Organism | Position | Strand | Matrix score. | sequence | function                                                        |
|---------------------|----------|----------|--------|---------------|----------|-----------------------------------------------------------------|
| <a href="#">ARE</a> | Zea mays | 536      | -      | 6             | AAACCA   | cis-acting regulatory element essential for the anaerobic induc |
| <a href="#">ARE</a> | Zea mays | 1130     | -      | 6             | AAACCA   | cis-acting regulatory element essential for the anaerobic induc |
| <a href="#">ARE</a> | Zea mays | 557      | -      | 6             | AAACCA   | cis-acting regulatory element essential for the anaerobic induc |

- + AT-rich element
- + AT~TATA-box
- + Box 4
- + CAAT-box
- + G-Box
- + G-box
- + GATA-motif
- + MBS

| Site Name           | Organism             | Position | Strand | Matrix score. | sequence | function                                          |
|---------------------|----------------------|----------|--------|---------------|----------|---------------------------------------------------|
| <a href="#">MBS</a> | Arabidopsis thaliana | 1727     | +      | 6             | CAACTG   | MYB binding site involved in drought-inducibility |

- + MYB
- + MYB-like sequence
- + MYC
- + Myb
- + O2-site
- + P-box

| Site Name             | Organism     | Position | Strand | Matrix score. | sequence | function                       |
|-----------------------|--------------|----------|--------|---------------|----------|--------------------------------|
| <a href="#">P-box</a> | Oryza sativa | 574      | +      | 7             | CCTTTTG  | gibberellin-responsive element |

- + STRE
- + TATA-box
- + TCA

| Site Name           | Organism      | Position | Strand | Matrix score. | sequence   | function |
|---------------------|---------------|----------|--------|---------------|------------|----------|
| <a href="#">TCA</a> | Pisum sativum | 935      | +      | 9             | TCATCTTCAT |          |
| <a href="#">TCA</a> | Pisum sativum | 1473     | -      | 9             | TCATCTTCAT |          |

- + TCCC-motif
- + Unnamed\_1
- + Unnamed\_2
- + Unnamed\_4
- + W box
- + WRE3
- + WUN-motif
- + circadian

>Traes\_2BS\_B6EBC0962.1

```

+ GCTTTGCCGT AGGCATAGCC CTGCCGCCAG GAGAAGCCGG GGGACGACAC FTGGCCGAGG TATGCTGACG
- CGAAACGGCA TCCGTATCGG GACGGCGGTC CTC'TTCGGCC CCCTGCTGTG CACCCCGTCC ATACGACTGC

+ ACTAGGCTGT CGGCATAGAT TTCCATCTAT GCCGACGGCC GAGCCGTCGG CATACTATGCG CACCGTGTGG
- TGATCCGACA GCCGTATCTA AAGGTAGATA CGGCTGCCGG CTCGGCAGCC GTATGTACGC GGTGCACAGC

+ TCCCTGAAT CGCCAGCGCT GTTGACGGCG CCGTCCGTTG CCGTCAGACG GAAAACAACG CCGATGGCTA
- AGGGGACTTA GCGGTGCGGA CAACTGCCGC GGCAGGCAAC GSCAGTCTGC CTTTTGTTCG GGCTACCGAT

+ AACTATGCCG ACGGCTCTCC CACGGCCGTC GGCATATGCT CCTATGTCGA CGGCTATACT ACGCCGACGG
- TTGATACGGC TGCCGAGAGG GTGCCGGCAG CCGTATACGA GGATACAGCT GCCGATATGA TGCCGCTGCC

+ TCTGACACAT CTACGCTGAC GTCATCTACG CCGACGGGGA TATGCCGATG GCAGCCGTAG GCATAGATCT
- AGACTGTGTA GATGCGACTG CACTAGATGC GGCTGCCCTT ATACGGCTAC CGTCGGCATC CGTATCTAGA

+ ATGCCGACGG CAATGGACCT ATGCCGACGG CCTTGGGCGG TAGGCATAGC CCGCGAGTCC GGTGGTGTTC
- TACGGCTGCC GTTACCTGGA TACGGCTGCC GGGACCCGGC ATCCGTATCG GCGCTCAGG CCACCACAAA

+ GGATTTTTGC CCCAAGGATG CCCATTCAAA AATACCAGGA TCAAGAGTTA TGCTACTTTA GCTTTTGCAG
- CCTAAAAACG GGGTTCCTAC GGGTAAGTTT TTATGGTCCT AGTTCTCAAT ACGATGAAAT CGAAAAACGTC

+ GACCCACATG TGATAATTGT GGTAAAAATG CCCAAAGAGA CTGATCAGTG TTTTTGTAA AAGATTAGGC
- CTGGGTGTAC ACTATTAACA CCAATTTTAC GGGTTTCTCT GACTAGTCAC AAAAAACATT TTCTAATCCG

+ AAAGAATCAG TGTTCTGGC CCAAATTCAT AAACFGGTGT TTTGTGCGAA CCTTGCAAC AATATGGTGG
- TTTCTTAGTC ACCAAGACCG GGTTTAAGTA TTTGACCACA AAACACGCTT GGAACCGTTG TTATACCACC

+ TTTCTTTTGC AATTCACTCG AGTTGGGCG AGTCTACGT AGTGCAAAAC ATTCAAGACA AATCCGTTGT
- AAAGAAAACG TTAAGTGAGC TCAACCCGTC GATAGATGCA TCACGTTTTG TAAGTTCTGT TTAGGCAACA

+ TGGATCGTGA GCCAAGAAAA GAGCTTGACT TTTGATGGAG TCCAAGCCTT TCATATCATG GGATCCATCG
- ACCTAGCACT CGGTTCTTTT CTCGAACTGA AAACCTACCTC AGGTTTCGAA AGTATAGTAC CCTAGGTAGC

+ GGGAAAGAGT CATCGCAAGA AATTGTGCTT ATATATGCCG TGACGCCCCA ATAGATCTCA TCATTAGAGT
- CCCTTTCTCA GTAGCGTCTT TTAACACGAA TATATACGGC ACCTGCGGGT TATCTAGAGT AGTAATCTCA

+ GCTTCCAGAG AATGTCATCC TCCACAAGTT CATCAAGAGG GAAATCATGC ACAAGCATCC AAAGAGTAAA
- CGAAGGTCTC TTACAGTAGG AGGTGTTCAA GTAGTTCTCC CTTTAGTACG TGTTCTGATG TTTCTCATTT

+ AACTCCATA TGTGGGCAGC GGAGACGATA GTGCTTTAT TGTATCATGAG GATCCAAGCG TTATCTTTAA
- TTGAGGGTAT ACACCCGTCG CCTCTGCTAT CACGAAATAA ACTAGTACTC CTAGGTTFCG AATAGAAATF

+ GGGCTTCAAG CATCTTTCAA TTCTTCCTTC TCAAGGCTTC AAAGATGTGG TCGATGTCC TTAGGCTTAT
- CCCGAAGTTC GTAGAAAGTT AAGAAGGAAG AGTTCGGAAG TTTCTACACC ACGCTACAGG AATCCGAATA

+ TCCCAACGAG CCATAGGGAG TCCCAATATG GTGCTTTTGC GCCATGGCTC ACGGTGATAG TGGTGAAGC
- AGGGTTGCTC GGTATCCCTC AGGGTTATAC CACGAAACG CCGTACCAGG TGCCACTATC ACCACTTCG

+ ATATAAAAAT ATGGGTCTCT CTCAGTGCAC GGATTTTCAT GCCCACACA CAGTTTGTTC GGCTCTTTTC
- TATATTTTTA TACCCAGGAG GAGTCACGTG CCTAAAAGTA CCGGGTGTGT GTCAAACAAC CCGAGAAAAG

+ ATTCATACCA TGGCCAATGA AGGCGCAAAG CTCTTACAAA TTTGTCAAGT TTTAGGACGC CAAGGCCACC
- TAAGTATGGT ACCGGTACT TCCCGTTTC GAGAATGTTT AAACAGTCAC AAATCCTGCG GTTCCGGTGG

+ GTACTACTG GGGCGGCATA CAATCTCCCA GCTGACATTG CGTTTGGCGC TGATCGTCTT GTTGAGCCG
- CATGAGTGAC CCCGCCGTAT GTTAGAGGGT CGACTGTAAC GCGAACCGCG ACTAGCAGAA CAACCTCGGC

+ GACCAAAGAA AAGCCCGGTC AATTTTGTTC AGGTTTGGGA CCGTGCTCGG CGGGACGATG AGAGGCGTGA
- CTGGTTTCTT TTCGGGCCAG TTAACAACAAC TCCAAAACCT GGCACGAGCC GCCCTGCTAC TCTCCGCACT

+ TGGAGTACAC CGCTTCGGAG GACACGACCG ACTTAACAAG CAAAGTTCGA CCAATGTTAG TTACAGTTTC
- ACCTCATGTG GCGAAGCCTC CTGTGCTGGC TGAATTGTTT GTTCAAGCT GGTACAATC AATGTCAAAG

+ TGGAAAAAAA AATACAGACG GTGGATGCCG CCTCAATCTT CCGGTGTPCA TCTCCCCTA TGCTTCAAGA
- ACCTTTTTTT TTATGTCTGC CACCTACGGC GGAGTTAGAA GGCACAGGT AGAGGGGGAT ACGAAGTTCT

+ AGCCAGGCTC ACCTCTCAGC GTCCAGCTG CGGAATTGTC TCGTGTGGC CGAAGGCGAC GGGAGCGCAA
- TCGGTCCGAG TGGAGAGTCG CAGGGTCGAC GCCTTAACAG AGCACAACCG GCTTCCGCTG CCCTCGGTT

+ GATGACTGCG CACCGGTCAA AACGAGGGTG AATCGCCTTG GAACAACGCA CACATGGCTC CAGGCGTCCC
- CTACTGACGC GTGGCCAGTT TTGCTCCAC TTAGCGGAAC CTTGTTGCGT TGTACCGAG GTCCGAGGG

+ TACTATACTA TTCGTACGTA CGTAAGGCCA AACGGTTGGT GTCCACGCAC ACATGGCTCC AGGCGTCCGT
- ATGATATGAT AAGCATGCAT GCATTCGGGT TTGCCAACCA CAGGTGCGTG TGTACCGAGG TCCGAGGCA

+ GAGCATGGAA GTGATGAAAA AAGAGAGATC GTTCAATGTT TTGCATATAT CTGCGCGATA AACTCCAAGA
- CTCGTACCTT CACTACTTTT TTCTCTCTAG CAAGTTACAA AACGTATATA GACGCGCTAT TTGAGGTTCT

+ GAGATCGCTC AAGTTGGCCA GGTGGTGTGT GGCGGTAGCG ACTCAAGCTG GAAGCTGCCG CAGCCTAAGC
- CTCTAGCGAG TTCAACCGGT CCAACCACAA CCGCCATCGC TGAGTTGAC ACTTCGACGGC GTCGGATTTCG

+ CTTGGATGCA TGCGCGACCC TTCCTTCCAA ATAAGCTTGT CGATCGATGC CAATATGCCA TGTACCTAGC
- GAACCTACGT ACGCGCTGGG AAGGAAGGTT TATTCGAACA GCTAGCTACG GTTATACGGT ACATGGATCG

+ AGATTGCGGG GTACCCGATC GAACGGCTAG CTATATCG
- TCTAACGCC CATGGGCTAG CTTGCCGATC GATATAGC

```

Motifs Found

-  A-box
-  ABRE

| Site Name | Organism             | Position | Strand | Matrix score. | sequence   | function                                                        |
|-----------|----------------------|----------|--------|---------------|------------|-----------------------------------------------------------------|
| ABRE      | Hordeum vulgare      | 46       | -      | 9             | GCAACGTGTC | cis-acting element involved in the abscisic acid responsiveness |
| ABRE      | Arabidopsis thaliana | 132      | +      | 6             | CACGTG     | cis-acting element involved in the abscisic acid responsiveness |
| ABRE      | Arabidopsis thaliana | 49       | +      | 5             | ACGTG      | cis-acting element involved in the abscisic acid responsiveness |
| ABRE      | Arabidopsis thaliana | 299      | +      | 5             | ACGTG      | cis-acting element involved in the abscisic acid responsiveness |
| ABRE      | Arabidopsis thaliana | 48       | +      | 6             | CACGTG     | cis-acting element involved in the abscisic acid responsiveness |
| ABRE      | Arabidopsis thaliana | 133      | +      | 5             | ACGTG      | cis-acting element involved in the abscisic acid responsiveness |
| ABRE      | Hordeum vulgare      | 130      | +      | 9             | GCAACGTGTC | cis-acting element involved in the abscisic acid responsiveness |

-  ARE

| Site Name | Organism | Position | Strand | Matrix score. | sequence | function                                                        |
|-----------|----------|----------|--------|---------------|----------|-----------------------------------------------------------------|
| ARE       | Zea mays | 628      | -      | 6             | AAACCA   | cis-acting regulatory element essential for the anaerobic induc |

-  AT~TATA-box
-  AuxRR-core

| Site Name  | Organism          | Position | Strand | Matrix score. | sequence | function                                                       |
|------------|-------------------|----------|--------|---------------|----------|----------------------------------------------------------------|
| AuxRR-core | Nicotiana tabacum | 363      | -      | 7             | GGTCCAT  | cis-acting regulatory element involved in auxin responsiveness |

- 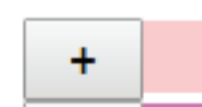 CAAT-box
-  CCAAT-box
-  CCGTCC motif

| Site Name    | Organism          | Position | Strand | Matrix score. | sequence | function |
|--------------|-------------------|----------|--------|---------------|----------|----------|
| CCGTCC motif | Nicotiana tabacum | 171      | +      | 6             | CCGTCC   |          |

- 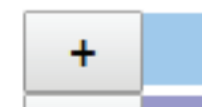 CCGTCC-box
-  CGTCA-motif
-  DRE core
-  G-Box
-  G-box
-  GC-motif
-  GT1-motif
-  I-box
-  MSA-like
-  MYB
-  MYB recognition site
-  MYB-like sequence
-  MYC
-  Myb-binding site
-  O2-site
-  STRE
-  Sp1
-  TATA-box
-  TCA-element

| Site Name   | Organism          | Position | Strand | Matrix score. | sequence  | function                                                     |
|-------------|-------------------|----------|--------|---------------|-----------|--------------------------------------------------------------|
| TCA-element | Nicotiana tabacum | 1125     | -      | 9             | CCATCTTTT | cis-acting element involved in salicylic acid responsiveness |

-  TCT-motif
-  TGACG-motif

| Site Name   | Organism        | Position | Strand | Matrix score. | sequence | function                                                          |
|-------------|-----------------|----------|--------|---------------|----------|-------------------------------------------------------------------|
| TGACG-motif | Hordeum vulgare | 66       | +      | 5             | TGACG    | cis-acting regulatory element involved in the MeJA-responsiveness |
| TGACG-motif | Hordeum vulgare | 182      | -      | 5             | TGACG    | cis-acting regulatory element involved in the MeJA-responsiveness |
| TGACG-motif | Hordeum vulgare | 163      | +      | 5             | TGACG    | cis-acting regulatory element involved in the MeJA-responsiveness |
| TGACG-motif | Hordeum vulgare | 297      | +      | 5             | TGACG    | cis-acting regulatory element involved in the MeJA-responsiveness |

-  Unnamed\_1
-  Unnamed\_2
-  Unnamed\_4
-  W box

>Traes\_1AS\_6C84785B3.2

```

+ TTTAAGGGTT TGAGGGTTAA GGGGTTCTAG TCTACACGAT TTCTTGCTCG CAAACTGTAA AAAAGCAGTT
- AAATTCCTAA ACTCCCAATT CCCCAAGATC AGATGTGCTA AAGAACGAGC GTTTGACATT TTTTCGTCAA

+ ATTTATAAGG GTTTGGAGGT TTGAGGGCTC TGCTAGAGAT GCTCTTATAG CATCTTCAGC AGACCTCGTA
- TAAATATTC CAAACCTCCA AACTCCCGAG ACGATCTCTA CGAGAATATC GTAGAAGTCG TCTGGAGCAT

+ TAGATGGTCA AACCCATAAA ATAACCATTT TTTGTAATTT CAATAAAAAG AAGATCCGGA CAAATCCTTT
- ATCTACCAGT TTGGGTATTT TATTGGTAAA AAACATTAATA GTTATTTTTTC TTCTAGGCTT GTTTAGGAAA

+ AAAATCGTCC GACCTTTTAA AAATTTTAA GAGCCCCGTA AACATGTAGC CGAAACCCTC GTATCTATAA
- TTTTAGCAGG CTGGAAATTT TTTAAAATTG CTCGGGGCAT TTGTACATCG GCTTTGGGAG CATAGATATT

+ TTTTGATGGC AACTTTTACA AAGCCCTAGA TACCAATCAA CGTTGGCGGT TGAAAAATCT CTACTCCGGC
- AAAACTACCG TTGAAAATGT TTCGGGATCT ATGGTTAGTT GCAACCGCA ACTTTTATA GATGAGGCCG

+ TAACGCCATG AAGCTCGCCC GGCCGCCCG CCACCACGCC CGTCCGTCCTA TGCCGGCCGG CCGGCCCGCT
- ATTGCGGTAC TTCGAGCGGG CCGGCCGGCC GGTGGTGGG GCAGGCAGGT ACGGCCGGCC GGCCGGCGCA

+ CGTCCACCCC GGCCACAGCG CACAGCGAGC GAGGTGCTAG CTAGCTAGCT CGCTTTTGA TGGATTCGAG
- GCAGGTGGGG CCGGTGTGCG GTGTCTGTC CTCCACGATC GATCGATCGA GCGAAAACCT ACCTAAGCTC

+ CTAGGCTAGC TAGCTAGCTC GCTCCTGGAT GGATTGGAGC AGAGCTAGCT AGCTAGCTCT TGATCGATTG
- GATCCGATCG ATCGATCGAG CGAGGACCTA CCTAACCTCG TCTCGATCGA TCGATCGAGA ACTAGCTAAG

+ GAGCAGATCT AATGGATGGA TCCCCTGGCT CTATTTTGA CCGTTTCGTG TGTTATTTGT CGATTTTGGC
- CTCGCTAGA TTACCTACCT AGGGCGCCGA GATAAAAAC GGCAAAAGCAC ACAATAAACA GCTAAAACGC

+ GAAGCAAGCT AGCTGACTAT GGACACGGAT GAGAAGAAGA AGAAGATGTG AAGAAAGAAT ATAAGTGAAT
- CTTCGTTTCA TCGACTGATA CCTGTGCTA CTCTCTTCT TCTTCTACAC TTCTTTCTTA TATTACTTA

+ ATTCCTTTT ACAGTTTAAA TTGAGGGGT CTGTCTGTC GCAGTAAAA CCGATCCTTA AAACCGTTTT
- TAAGGCAAAA TGTCAAATTT AAACCTCCCA GACAAGACGG CGTCATTTT GGCTAGGAAT TTTGCGCAAA

+ TTCATGAAC GCAAAAGTGT TTTGCGGATC GGCAGGATAT AGGGTCTGCT AGAGATGCTC TTAGAGTCGC
- AAGTACTTGA CGTTTTTACA AAACGCTTAG CCGTCTATA TCCAGACGA TCTTACGAG AATCTCAGCG

+ AACACCTTC GCGTCACTAT CGGGCGGCA ATCCCTCGA TCAGCTGCTG CATTGAGCAC TTGCGCTTGC
- TTGTTGGAAG CGCAGTGATA GCCCCCGCT TAGGAGAGCT AGTCGAGCAC GTAACCTGTG AACGCGAACG

+ ACGATCCGAA CTACGCTTGC TATAGAAATG ACACCACGCC AGCCCATGAC GGCTAGGCTT TTCCCTAAC
- TGCTAGGCTT GATGCGAACC ATATCTTTAC TGTGGTGGG TCGGGTACTG CCGATCCGAA AAGGGAATTG

+ TCTCTTTTTC TCATTTTAGT TTTTGCTCAT TTTACTTATG CCACTCTAGA ATTTAACATT TTACTTTTAC
- AGAGAAAAAC AGTAAAAATCA AAAACGAGTA AAATGAATAC GGTGAGATCT TAAATGTAA AATGAAAATG

+ CATTTTTTGC TTTTAAACAAT ACATCATAAA TGCACCGTGG CAAAAACAAT AATGTTTTAT TTCACTTTTG
- GTAAAAACG AAAATTTGTA TGATGATTT ACGTGGCACC GTTTTTGTTA TTACAAAATA AAGTAAAAAC

+ CCATTTTAA CTTTTGACAA TGTATTACAA TTGTCACTTC AAATATTTT TTTTGGCCAC GGAATGGCAA
- GGTAAGAATT GAAAACGTT ACATAATGTT AACAGTGAAG TTTATAAAC AAAACCGGTG CCTTACCGTT

+ AAGTGGTATA TTATCAAAAG CTAAGAGTGA CAAAAGTGA ATGTCAAATT CTAGAGTGGC ATAAGCACAG
- TTCACCATA ATAGTTTTTC GATTCCTACT GTTTTCACTT TACAGTTTAA GATCTACCG TATTCTGTGTC

+ TGGCAAAAAG CTAAAAGTGC AGAAACAAA TTTTCCCTCG ATTGAGAAT GTTTCCCTC GATTGAGAAC
- ACCTGTTTTT GATTTACCG TCTTTGTTT AAAAGGGAG TAACCTTGA CAAAAGGGAG CTAACCTTG

+ TTCATAAGTC TGGGTCGATT TCTGTATACT GCACTTCAG AATAGTCTT TTTCTAGTAT GCGCTGAATT
- AAGTATTCAG ACCCAGCTAA AGACATATGA CGTTGAAGTC TTATCAAGAA AAAGATCATA CGCGACTTAA

+ TATTTTTTAG CATGTGTGG CCTTAAGCG GTTATCATCT TGTGCAAAAC GTGCATCCGC TTAAGGCTCT
- ATAAAAATC GTACACAACC GGAATCCCG CAATAGTAGA ACACGTTTTG CACGTAGCG AATTCCGAGA

+ ACTGAAAAT TTTCTTTTA TTTGAAGAG GTTTCTATG GAGTTGATCT GCAATGCTAG TACATATATC
- TGACTTTTAA AAAGGAAAAT AAACCTCTCC CAAAGGATAC CTCACCTAGA CGTTACGATC ATGTATATAG

+ GCGTAATTC AAGATAAGCT CGCAATATGC ATGTCAGAAA AGGAGAGCTA TAGCTCCCG TGCAGGAAAT
- CCGATTAAG TTCTATTGTA GCGTTATACG TACAGTCTTT TCCCTCGAT ATCGAGGGCC ACGTCTTTA

+ ATGCCAACCA GAAGAAAGGG ACATAAGAAA AGACACTATA GAAAAGGCAC AGTTACGTGG CTCATCAAGA
- TACGGTTGGT CTCTTTTCCC TGTATTCTTT TCTGTGATAT CTTTTCCGTG TCAATGCACC GAGTAGTTCT

+ AAACAGTCT TCTCGAGTCT TGAGCACTGC ATTACAATCC ATCTATTCAA TCAGCAGACG TACATTACAT
- TTTGTCAGAG AGAGCTCAGA ACTCGTGAC TAATGTTAGG TAGATAAGTT AGTCGTCTGC ATGTAATGTA

+ TAACTGATG GATCAGCAT GCTCCTAAAC CTCCTATCAT GGACTTCGAC CTTTGGAGAA ACCCTGCAG
- ATTGACTACG CTAGTGGCTA CGAGGATTTG GAGGATAGTA CCTGAAGCTG GGAAACTCTT TGGGGACGTC

+ TACGGGAACA AAAGCAAGTT AGGACGGCCA TGGATCACCA ACCGGCCAGG ACAAATGAAC ATATGATTGA
- ATGCCCTTGT TTTCTTTCAA TCCTGCCGT ACCTAGTGGT TGGCCGGTCC TGTTTACTTG TATACTAAT

+ GTACTTAATC AGCCACTAGG AGCAGTCGAT CAGTTGATGA TTAGACTAAA GCAAGGCGG TGTGCATGCC
- CATGAATTAG TCGGTGATCC TCGTCAGCTA GTCAACTACT AATCTGATTT CGTTCCGCGC ACACGTACGG

+ GTGTTTATT GTGTTTTGTT CGAAAACGAA GGGCGAGA
- CACAAGTAAA CACAAAACAA GCTTTTGCTT CCCGCTCT

```

Motifs Found

- + A-box
- + AAGAA-motif
- + ABRE

| Site Name            | Organism             | Position | Strand | Matrix score. | sequence | function                                                        |
|----------------------|----------------------|----------|--------|---------------|----------|-----------------------------------------------------------------|
| <a href="#">ABRE</a> | Arabidopsis thaliana | 1449     | +      | 5             | ACGTG    | cis-acting element involved in the abscisic acid responsiveness |
| <a href="#">ABRE</a> | Arabidopsis thaliana | 1665     | +      | 5             | ACGTG    | cis-acting element involved in the abscisic acid responsiveness |

- + ABRE3a

| Site Name              | Organism | Position | Strand | Matrix score. | sequence | function |
|------------------------|----------|----------|--------|---------------|----------|----------|
| <a href="#">ABRE3a</a> | Zea mays | 1664     | +      | 6             | TACGTG   |          |

- + ABRE4

| Site Name             | Organism | Position | Strand | Matrix score. | sequence | function |
|-----------------------|----------|----------|--------|---------------|----------|----------|
| <a href="#">ABRE4</a> | Zea mays | 1664     | -      | 6             | CACGTA   |          |

- + ACE
- + AE-box
- + CAAT-box
- + CAT-box
- + CCGTCC motif
- + CCGTCC-box
- + CGTCA-motif

| Site Name                   | Organism        | Position | Strand | Matrix score. | sequence | function                                                          |
|-----------------------------|-----------------|----------|--------|---------------|----------|-------------------------------------------------------------------|
| <a href="#">CGTCA-motif</a> | Hordeum vulgare | 852      | +      | 5             | CGTCA    | cis-acting regulatory element involved in the MeJA-responsiveness |
| <a href="#">CGTCA-motif</a> | Hordeum vulgare | 957      | -      | 5             | CGTCA    | cis-acting regulatory element involved in the MeJA-responsiveness |

- + ERE
- + G-Box
- + G-box
- + GATA-motif
- + GT1-motif
- + Gap-box
- + LTR

| Site Name           | Organism        | Position | Strand | Matrix score. | sequence | function                                                      |
|---------------------|-----------------|----------|--------|---------------|----------|---------------------------------------------------------------|
| <a href="#">LTR</a> | Hordeum vulgare | 260      | +      | 6             | CCGAAA   | cis-acting element involved in low-temperature responsiveness |

- + MBS

| Site Name           | Organism             | Position | Strand | Matrix score. | sequence | function                                          |
|---------------------|----------------------|----------|--------|---------------|----------|---------------------------------------------------|
| <a href="#">MBS</a> | Arabidopsis thaliana | 1921     | -      | 6             | CAACTG   | MYB binding site involved in drought-inducibility |

- + MBSI
- + MYB
- + MYB-like sequence
- + MYC
- + Myb
- + STRE
- + Sp1
- + TATA-box
- + TCA-element

| Site Name                   | Organism          | Position | Strand | Matrix score. | sequence   | function                                                     |
|-----------------------------|-------------------|----------|--------|---------------|------------|--------------------------------------------------------------|
| <a href="#">TCA-element</a> | Brassica oleracea | 1574     | +      | 9             | TCAGAAGAGG | cis-acting element involved in salicylic acid responsiveness |

- + TGACG-motif
- + Unnamed\_1
- + Unnamed\_2
- + Unnamed\_4
- + Unnamed\_6
- + W box
- + as-1
