# Supplementary material for: Genome-wide and evolutionary analysis of the class III peroxidase gene family in wheat and Aegilops tauschii reveals that some members are involved in stress responses
Source: PubMed Central journal article supplement (PMC6704529; doi:10.1186/s12864-019-6006-5), 2019-08-22

# upstream of Traes\_2DS\_D76AB139C.1 (+, 5'->3')

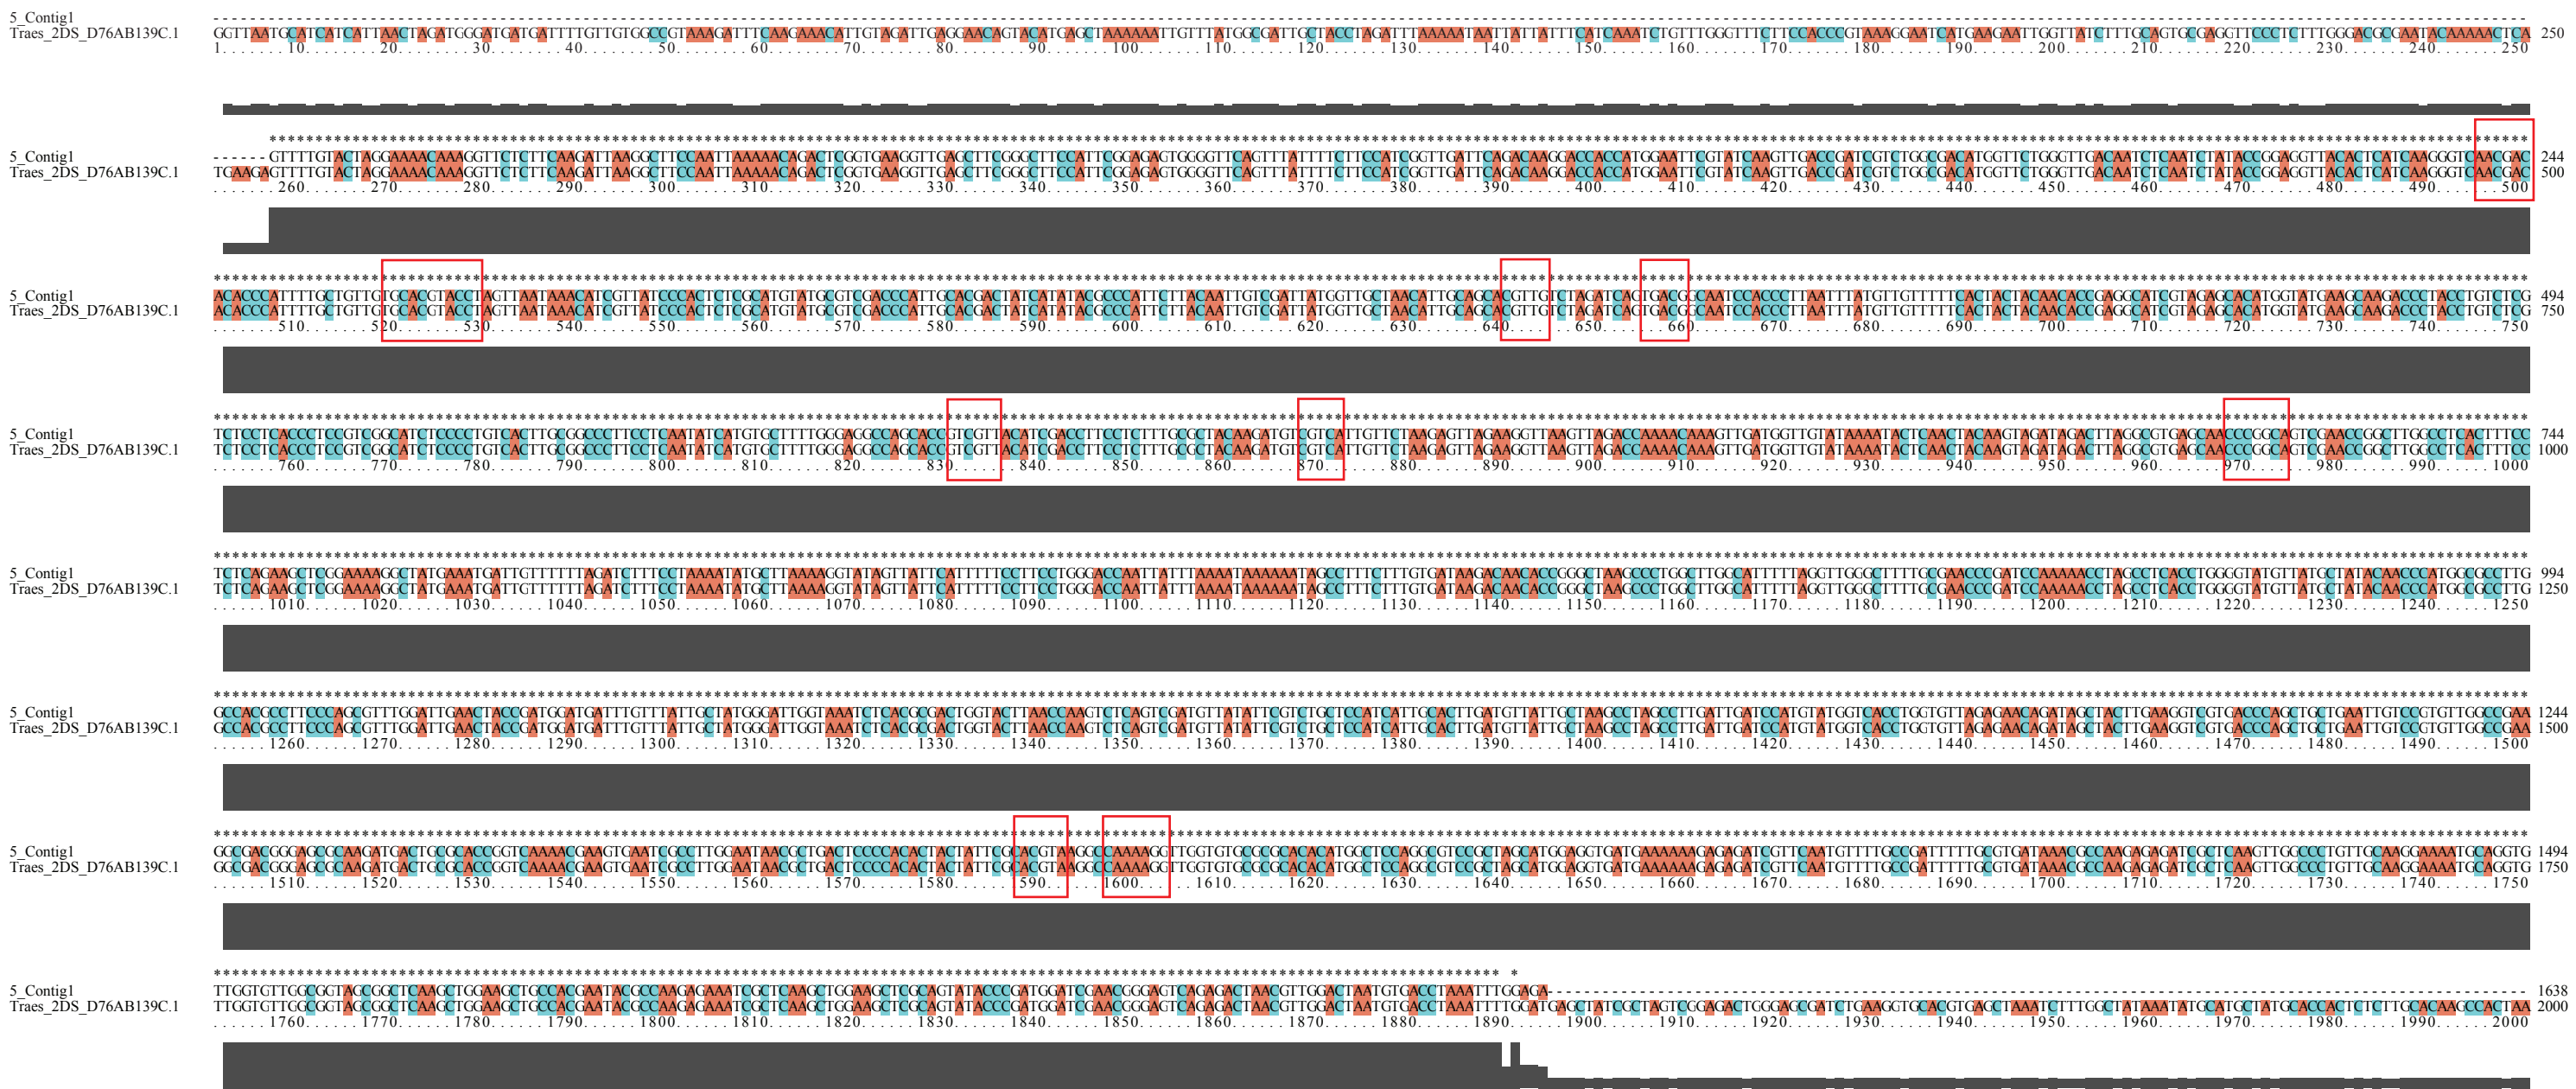

# upstream of Traes\_2DS\_2CCCA54C1.1 (+, 5'->3')

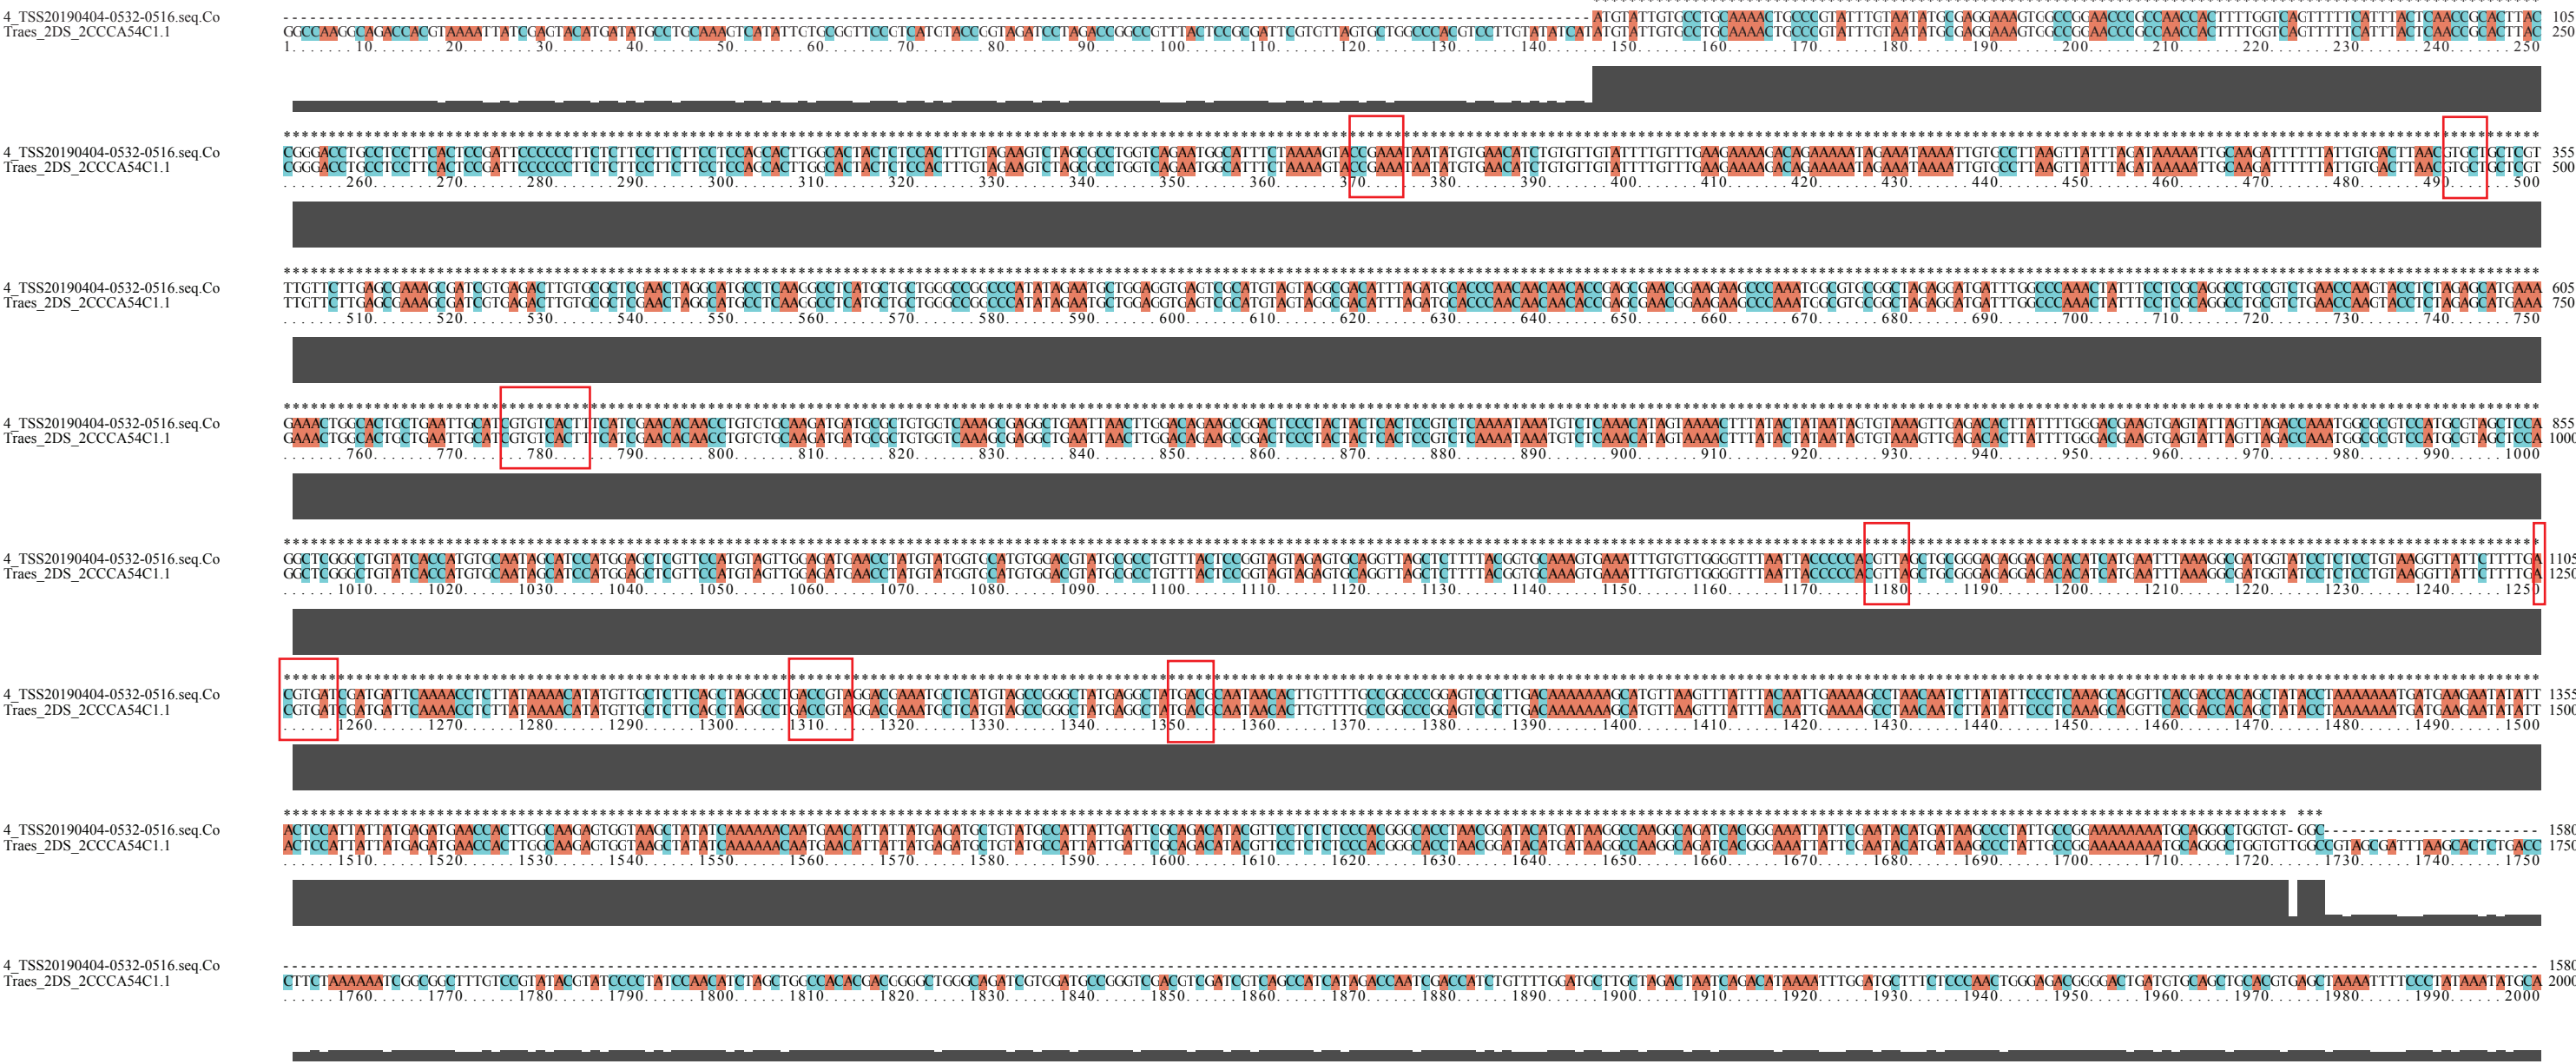

# upstream of Traes\_2BS\_40C683B47.1 (+, 5'→3')

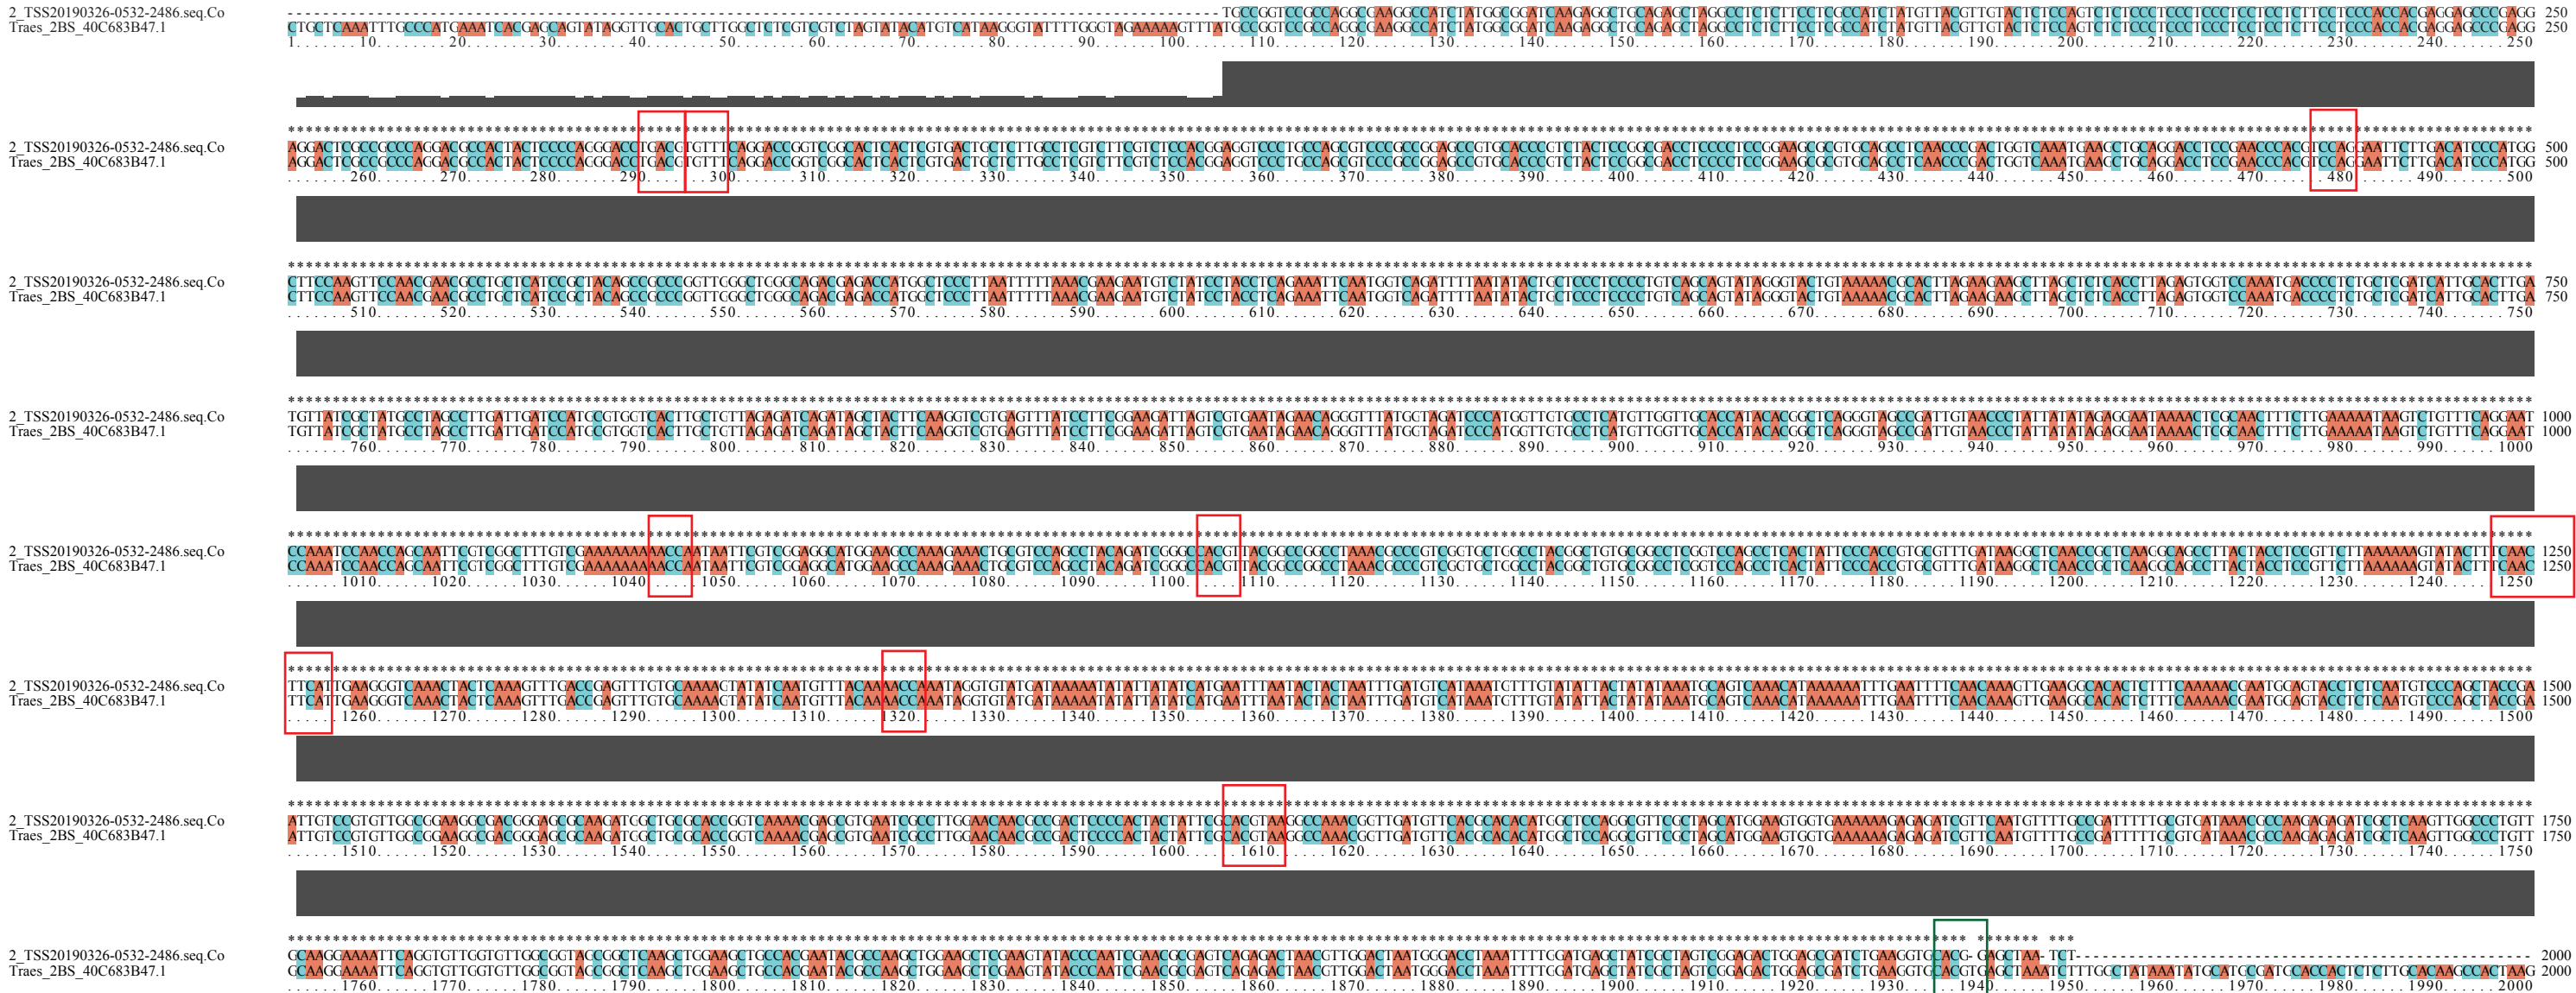

# upstream of Traes\_6AS\_5BAD56BB6.1 (-, 3'->5')

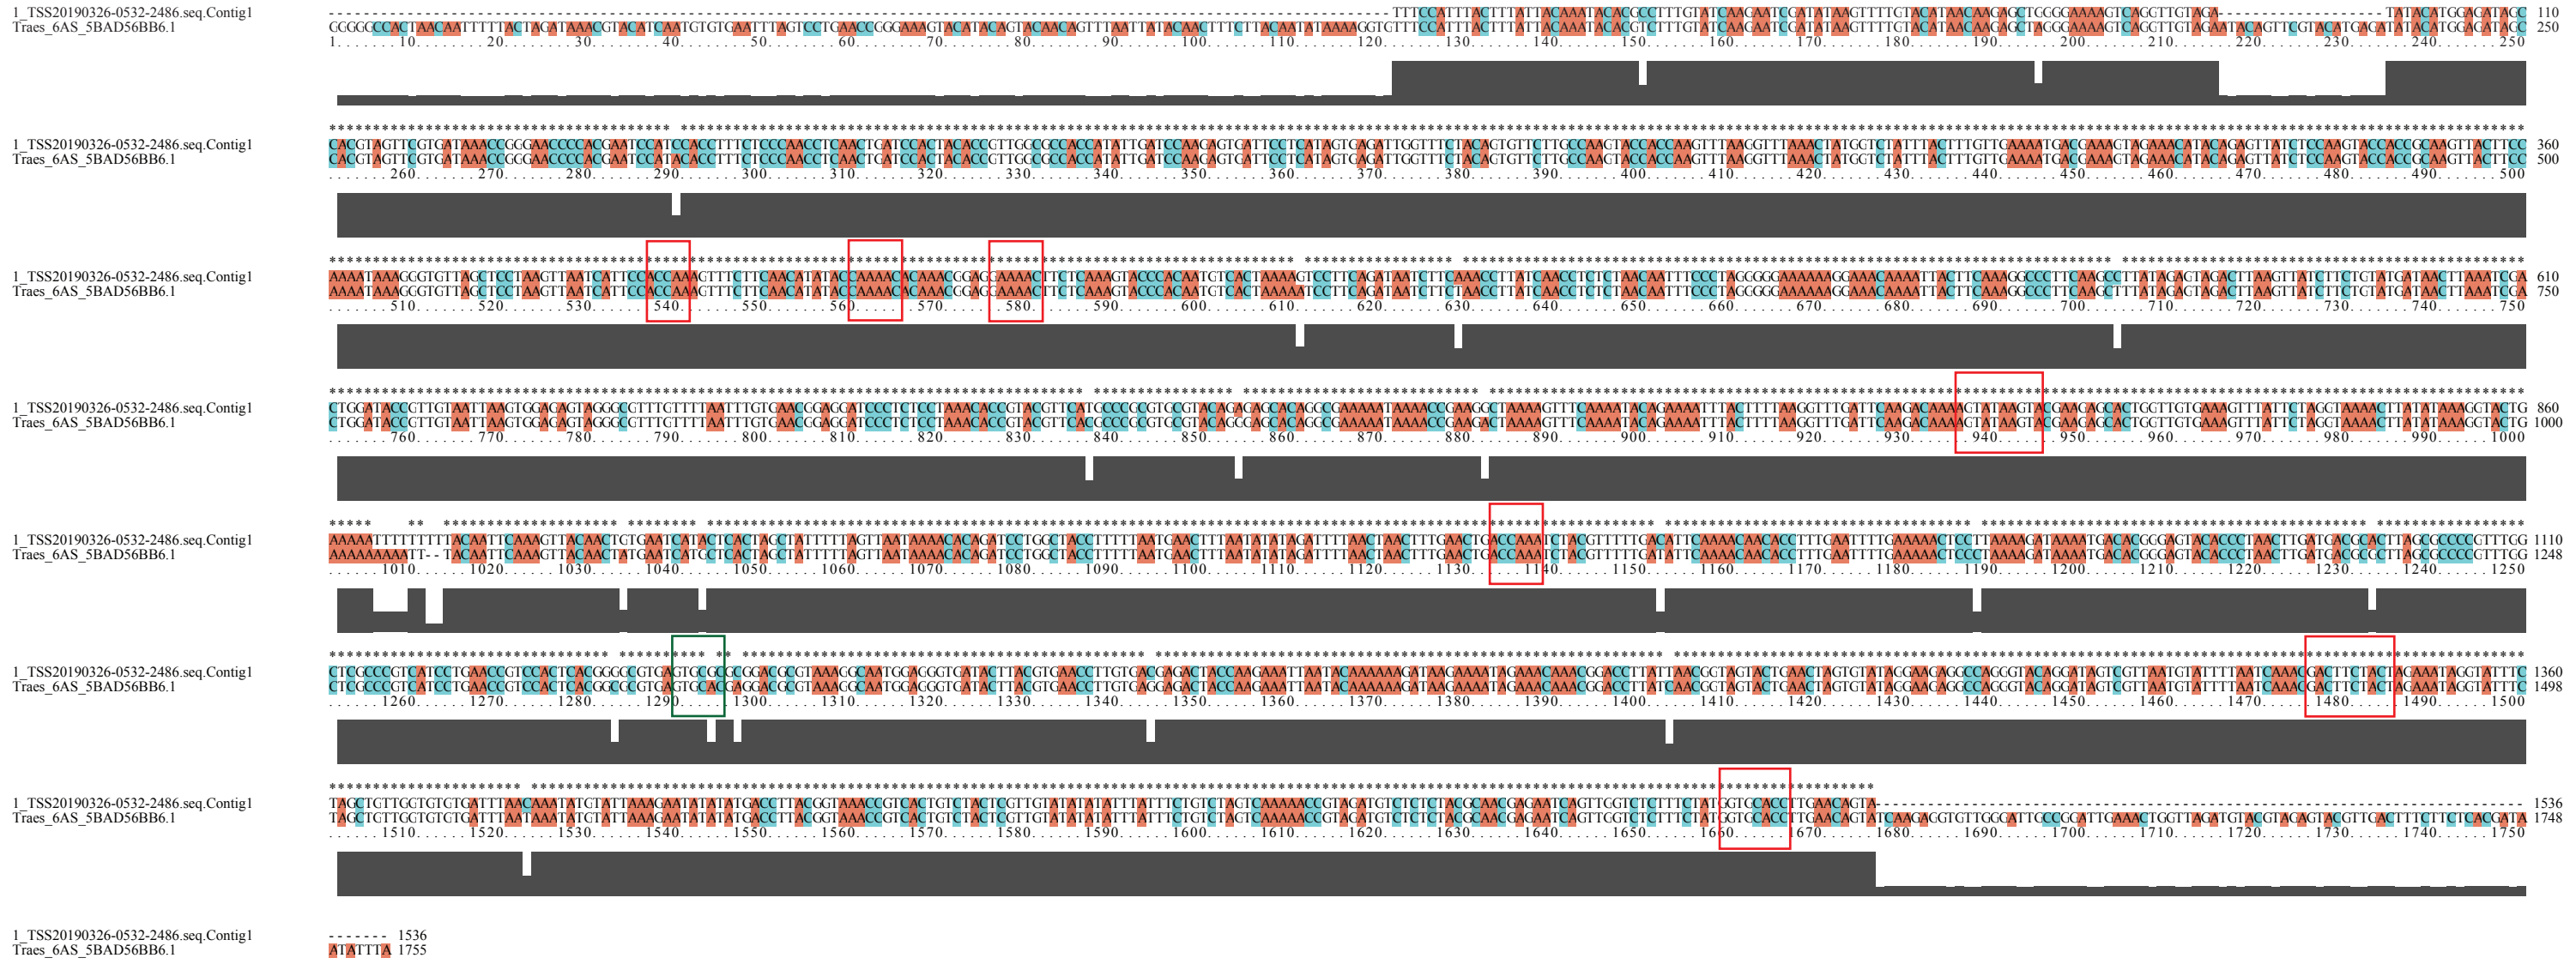

# upstream of Traes\_2BS\_B6EBC0962.1 (-, 3'->5')

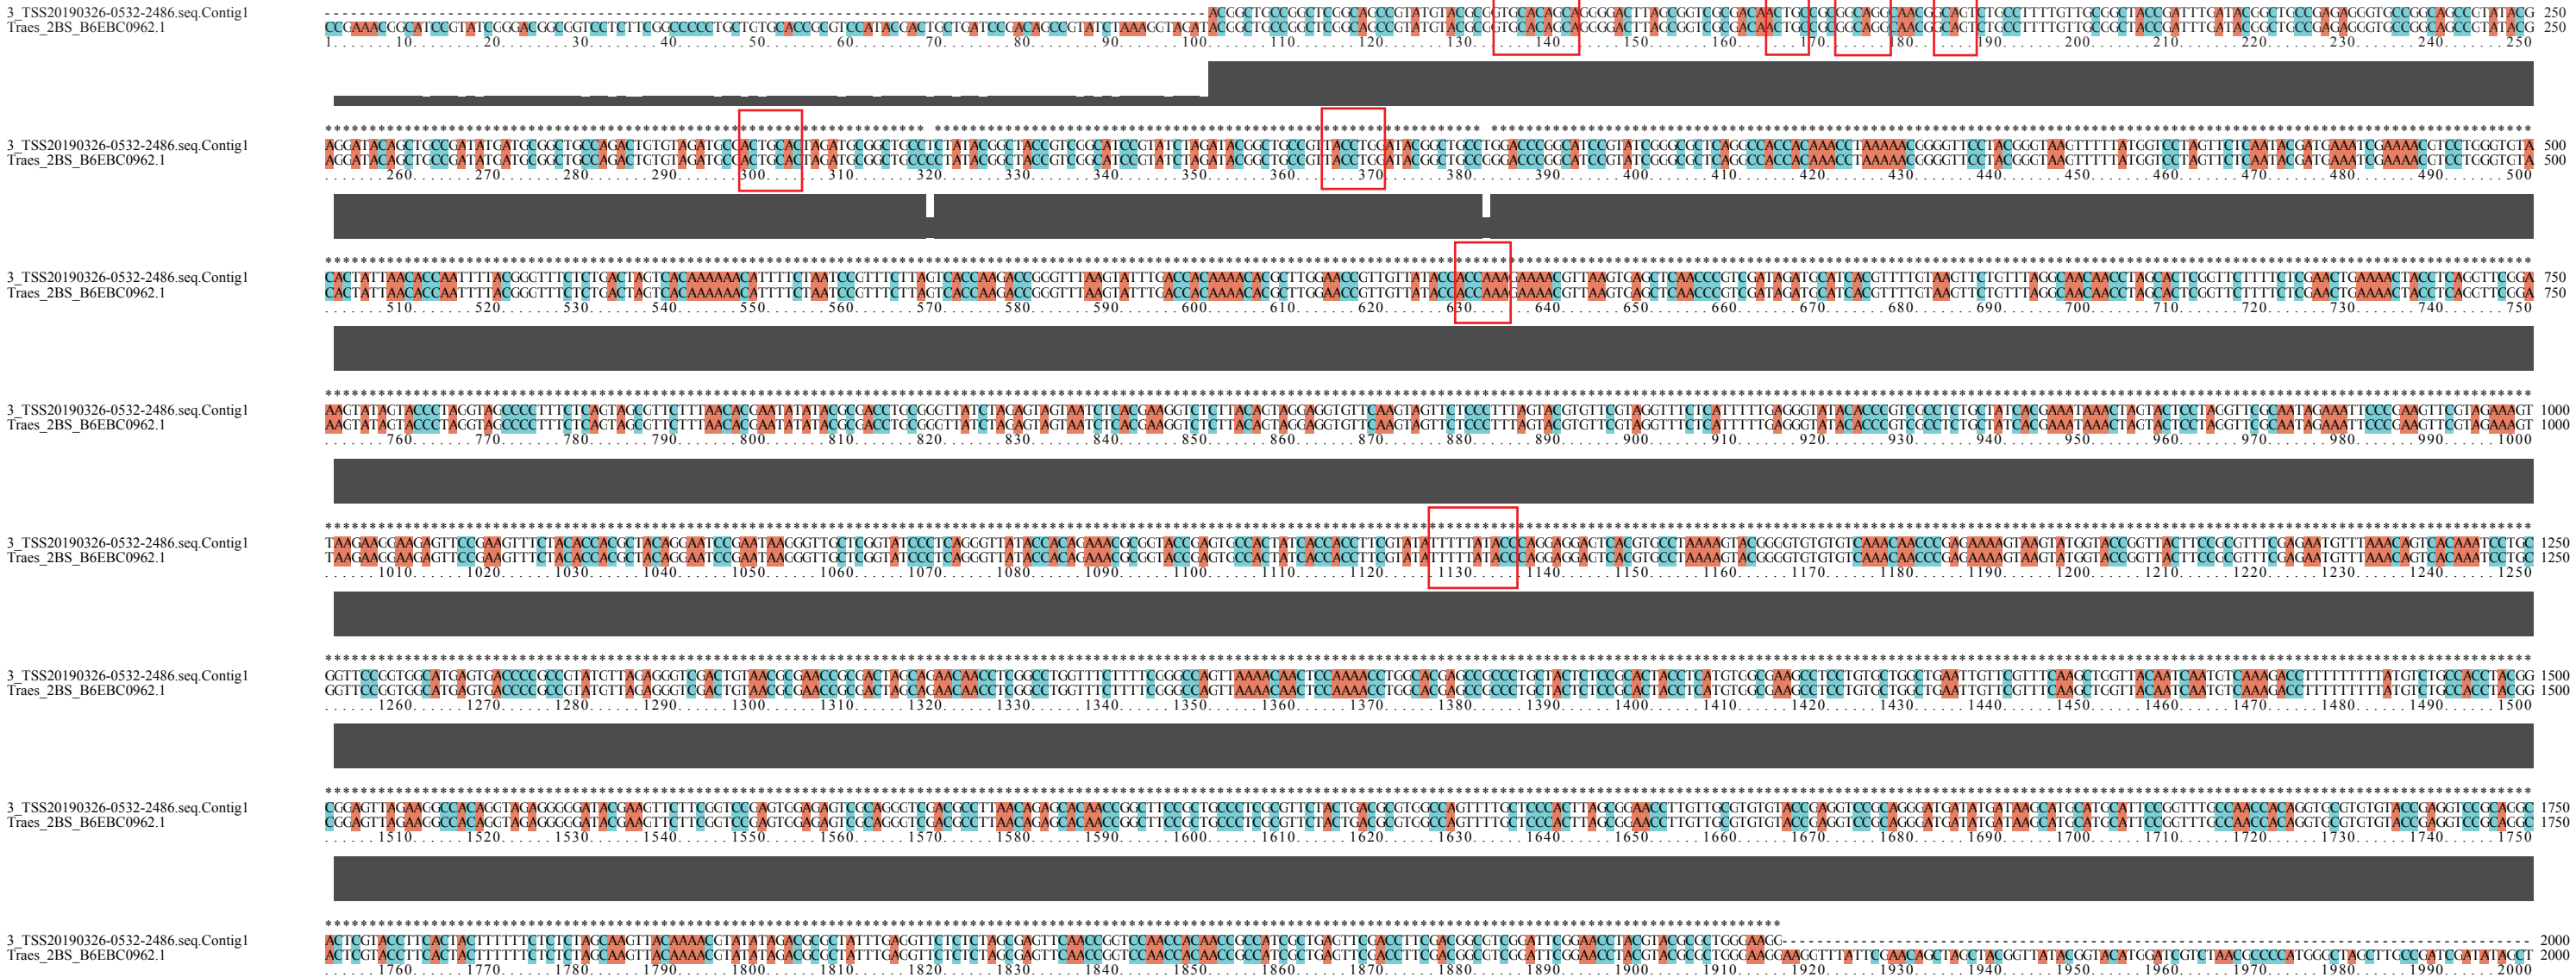

# upstream of Traes\_1AS\_6C84785B3.2 (+, 5'->3')

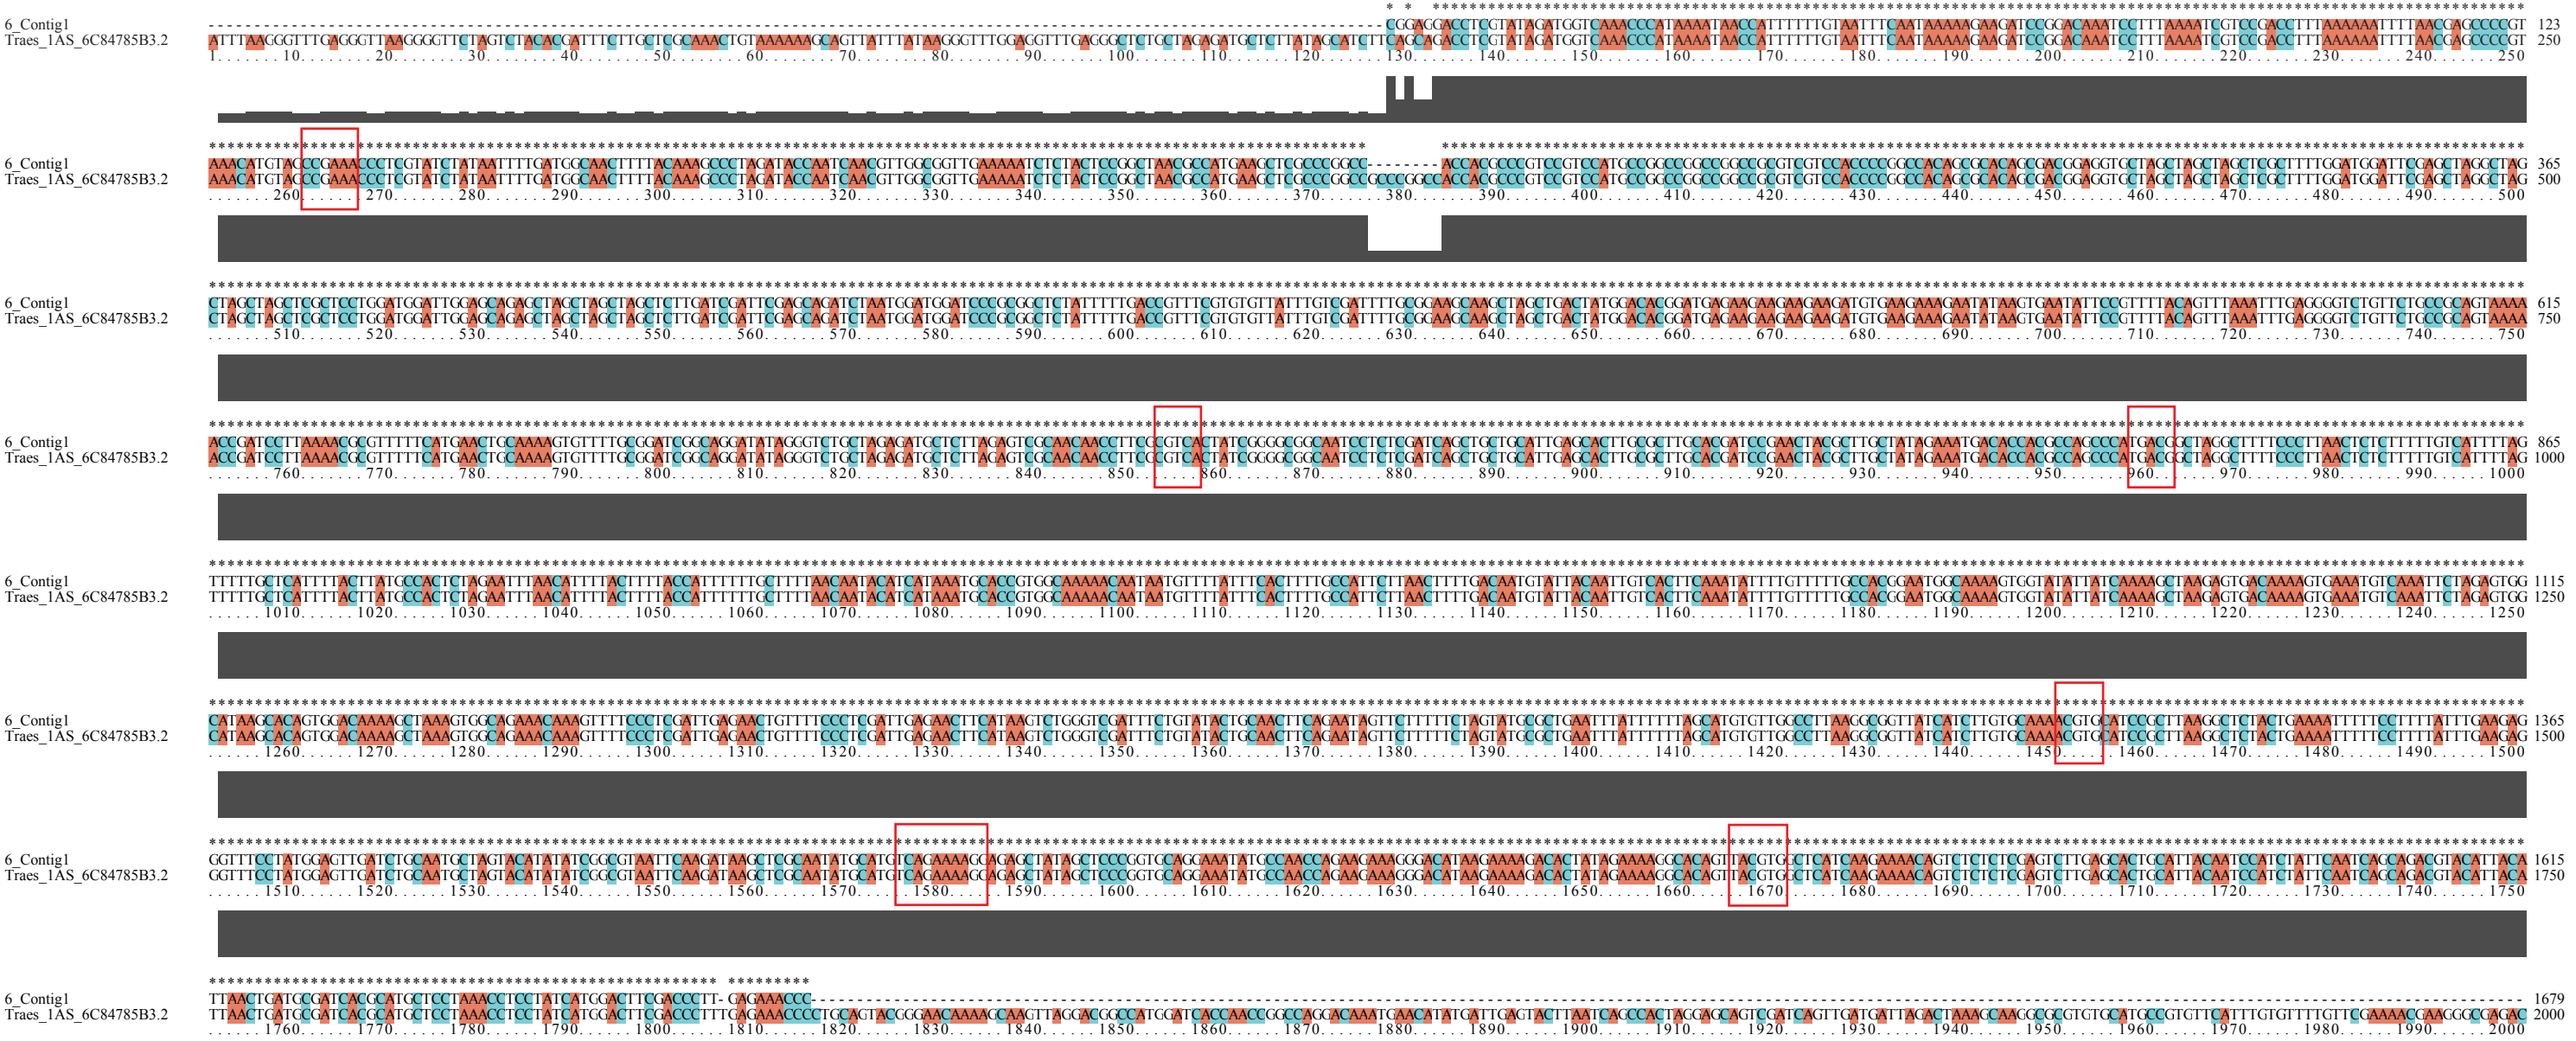

Supplement: 12864_2019_6006_MOESM10_ESM.pdf [file 12864_2019_6006_MOESM10_ESM.pdf]
